# Supplementary material for: Universal fragment descriptors for predicting properties of inorganic crystals
Source: Nat Commun. 2017 Jun 5;8:15679. doi: 10.1038/ncomms15679 (PMC5465371; doi:10.1038/ncomms15679)
Supplement: Supplementary Information — Supplementary Notes, Supplementary Tables and Supplementary References [file ncomms15679-s1.pdf]

## CONTENTS

|                          |                                        |     |
|--------------------------|----------------------------------------|-----|
| Supplementary Note 1.    | Feature importance                     | 2   |
| Supplementary Note 2.    | Five-fold cross validation predictions | 3   |
|                          | Metal/insulator classification         | 3   |
|                          | Band gap energy                        | 302 |
|                          | Bulk modulus                           | 441 |
|                          | Shear modulus                          | 470 |
|                          | Debye temperature                      | 499 |
|                          | Heat capacity at constant pressure     | 528 |
|                          | Heat capacity at constant volume       | 557 |
|                          | Thermal expansion coefficient          | 586 |
| Supplementary Note 3.    | Model validation predictions           | 615 |
|                          | Bulk modulus                           | 615 |
|                          | Shear modulus                          | 623 |
|                          | Debye temperature                      | 631 |
|                          | Heat capacity at constant pressure     | 639 |
|                          | Heat capacity at constant volume       | 647 |
|                          | Thermal expansion coefficient          | 655 |
| Supplementary Note 4.    | Comparison with experiments            | 663 |
|                          | Bulk modulus                           | 663 |
|                          | Shear modulus                          | 664 |
|                          | Debye temperature                      | 665 |
| Supplementary References |                                        | 666 |

# **SUPPLEMENTARY NOTE 1. FEATURE IMPORTANCE**

| variable                                                     | importance | mean   |
|--------------------------------------------------------------|------------|--------|
| $\text{avg}(\Delta H_{\text{fusion}} \lambda^{-1})$          | 0.1161     | 10.42  |
| $\text{avg}(V_{\text{molar}} r_{\text{cov}}^{-1})$           | 0.1120     | 23.34  |
| $\text{max}(\Delta H_{\text{fusion}} \lambda^{-1})$          | 0.0834     | 13.83  |
| $\text{min}(\Delta H_{\text{vapor}} V_{\text{molar}}^{-1})$  | 0.0578     | 7.64   |
| $\text{avg}(\alpha_{\text{P}} \Delta H_{\text{vapor}}^{-1})$ | 0.0199     | 0.16   |
| $\text{avg}(IP_2 V_{\text{molar}})$                          | 0.0192     | 349.66 |
| $\text{avg}(\Delta H_{\text{atom}} r_{\text{cov}})$          | 0.0183     | 411.19 |
| $\sum(IP_2 \Delta H_{\text{atom}}^{-1})$                     | 0.0121     | 1.70   |
| $\text{min}(C\lambda)$                                       | 0.0118     | 4.27   |
| $\text{max}(\Delta EA_{\text{bond}})$                        | 0.0108     | 0.30   |

Supplementary Table 1. Most significant features of the metal/insulator classification model. The mean value of each feature across the training set is also provided.

| variable                                             | importance | mean  |
|------------------------------------------------------|------------|-------|
| $\text{avg}(\chi Z_{\text{eff}}^{-1})$               | 0.0752     | 1.41  |
| $\text{avg}(C\lambda^{-1})$                          | 0.0713     | 17.45 |
| $\text{min}(CV_{\text{molar}})$                      | 0.0452     | 4.07  |
| $\text{avg}(CZ_{\text{eff}})$                        | 0.0244     | 3.37  |
| $\text{min}(\chi Z_{\text{eff}}^{-1})$               | 0.0220     | 0.66  |
| $\text{avg}(IP_3 C)$                                 | 0.0218     | 38.87 |
| $\sum(\Delta H_{\text{fusion}} - C)$                 | 0.0156     | 2.41  |
| $\text{avg}(Z_{\text{eff}} r_{\text{cov}})$          | 0.0147     | 5.32  |
| $\text{max}(EA\alpha_{\text{P}}^{-1})$               | 0.0104     | 1.88  |
| $\text{min}(\chi C)$                                 | 0.0103     | 1.11  |
| $\text{min}(\Delta(V_{\text{molar}})_{\text{bond}})$ | 0.0073     | 1.96  |
| $\text{avg}(\Delta IP_{\text{bond}})$                | 0.0073     | 3.08  |
| $\text{std}(\Delta IP_{\text{bond}})$                | 0.0067     | 1.38  |
| $\rho$                                               | 0.0048     | 6.03  |

Supplementary Table 2. Most significant features of the band gap energy regression model. The mean value of each feature across the training set is also provided.

| variable                                  | importance | mean    |
|-------------------------------------------|------------|---------|
| volume per atom                           | 0.2155     | 19.87   |
| $\text{med}(IP_2 \Delta H_{\text{atom}})$ | 0.0978     | 5640.00 |
| $\text{avg}(V_{\text{molar}} IP^{-1})$    | 0.0522     | 1.71    |
| $\text{min}(IP_3 \Delta H_{\text{atom}})$ | 0.0498     | 7347.37 |
| $\text{min}(IP \Delta H_{\text{atom}})$   | 0.0397     | 1907.13 |

Supplementary Table 3. Most significant features of the bulk modulus regression model. The mean value of each feature across the training set is also provided.

| variable                                      | importance | mean    |
|-----------------------------------------------|------------|---------|
| volume per atom                               | 0.2240     | 19.87   |
| $\text{med}(IP_2 \Delta H_{\text{atom}})$     | 0.0451     | 5640.00 |
| $\text{avg}(r_{\text{cov}} V_{\text{molar}})$ | 0.0436     | 17.92   |
| $\text{avg}(V_{\text{molar}} IP_3)$           | 0.0424     | 499.19  |
| $\text{med}(r_{\text{cov}} V_{\text{molar}})$ | 0.0335     | 17.92   |

Supplementary Table 4. Most significant features of the shear modulus regression model. The mean value of each feature across the training set is also provided.

| variable                                                          | importance | mean  |
|-------------------------------------------------------------------|------------|-------|
| $\text{avg}(V_{\text{molar}} C^{-1})$                             | 0.1512     | 53.99 |
| volume per atom                                                   | 0.1439     | 19.87 |
| $\text{avg}(m_{\text{atom}} C)$                                   | 0.0812     | 23.22 |
| $\text{avg}(m_{\text{atom}} \Delta H_{\text{atom}}^{-1})$         | 0.0589     | 0.38  |
| $\text{avg}(\Delta(p_{\text{P}})_{\text{bond}})$                  | 0.0509     | 4.18  |
| $\text{avg}(p_{\text{P}} Z_{\text{eff}})$                         | 0.0455     | 28.66 |
| $c$                                                               | 0.0264     | 5.55  |
| $\text{std}(\Delta H_{\text{vapor}} \Delta H_{\text{atom}}^{-1})$ | 0.0198     | 16.20 |
| $\text{avg}(\Delta EA_{\text{bond}})$                             | 0.0193     | 2.63  |
| $b$                                                               | 0.0179     | 5.32  |

Supplementary Table 5. Most significant features of the Debye temperature regression model. The mean value of each feature across the training set is also provided.

| variable                                                  | importance | mean  |
|-----------------------------------------------------------|------------|-------|
| volume per atom                                           | 0.1653     | 19.87 |
| $\text{avg}(m_{\text{atom}} C)$                           | 0.1092     | 23.22 |
| $\text{avg}(m_{\text{atom}} \Delta H_{\text{atom}}^{-1})$ | 0.0829     | 0.38  |
| $\text{avg}(V_{\text{molar}} C^{-1})$                     | 0.0614     | 53.96 |
| $\text{avg}(p_{\text{P}} N_{\text{V}}^{-1})$              | 0.0317     | 1.27  |

Supplementary Table 6. Most significant features of the heat capacity (at constant pressure) regression model. The mean value of each feature across the training set is also provided.

| variable                                                  | importance | mean  |
|-----------------------------------------------------------|------------|-------|
| volume per atom                                           | 0.1330     | 19.87 |
| $\text{avg}(m_{\text{atom}} C)$                           | 0.1098     | 23.22 |
| $\text{avg}(m_{\text{atom}} \Delta H_{\text{atom}}^{-1})$ | 0.0960     | 0.38  |
| $\text{avg}(V_{\text{molar}} C^{-1})$                     | 0.0950     | 53.96 |
| $\text{avg}(\Delta(p_{\text{P}})_{\text{bond}})$          | 0.0642     | 4.18  |
| $\text{avg}(p_{\text{P}} Z_{\text{eff}})$                 | 0.0573     | 28.68 |
| $\text{avg}(m_{\text{atom}} IP_3^{-1})$                   | 0.0334     | 3.23  |

Supplementary Table 7. Most significant features of the heat capacity (at constant volume) regression model. The mean value of each feature across the training set is also provided.

| variable                                                        | importance | mean    |
|-----------------------------------------------------------------|------------|---------|
| $\text{med}(IP_2 \Delta H_{\text{atom}})$                       | 0.1153     | 5643.45 |
| $\text{max}(IP \Delta H_{\text{atom}})$                         | 0.0993     | 3753.71 |
| $\text{min}(g_{\text{P}} \Delta H_{\text{atom}})$               | 0.0849     | 1962.71 |
| $\text{min}(\Delta H_{\text{fusion}} - \Delta H_{\text{atom}})$ | 0.0524     | -440.01 |
| $\text{avg}(IP \Delta H_{\text{atom}})$                         | 0.0411     | 2574.49 |

Supplementary Table 8. Most significant features of the thermal expansion coefficient regression model. The mean value of each feature across the training set is also provided.

## SUPPLEMENTARY NOTE 2. FIVE-FOLD CROSS VALIDATION PREDICTIONS

### Metal/insulator classification

| system                    | calculated | predicted |
|---------------------------|------------|-----------|
| Ac1Br3.ICSD_31578         | insulator  | insulator |
| Ac1Cl3.ICSD_31569         | insulator  | insulator |
| Ac1H2.ICSD_56392          | metal      | metal     |
| Ac1.ICSD_43491            | metal      | metal     |
| Ac2O3.ICSD_31750          | insulator  | insulator |
| Ag10C2F8.ICSD_407646      | insulator  | insulator |
| Ag13Al36Mg32.ICSD_55636   | metal      | metal     |
| Ag13O6Os1.ICSD_413193     | metal      | metal     |
| Ag15Cl3P4S16.ICSD_416586  | insulator  | insulator |
| Ag16Ca6N1.ICSD_78395      | metal      | metal     |
| Ag17Mg54.ICSD_58327       | metal      | metal     |
| Ag18O21Si6.ICSD_33907     | insulator  | insulator |
| Ag1Al1Li2.ICSD_57330      | metal      | metal     |
| Ag1Al1O2.ICSD_95662       | insulator  | insulator |
| Ag1Al1O2.ICSD_99688       | insulator  | insulator |
| Ag1Al1S2.ICSD_25356       | insulator  | insulator |
| Ag1Al1S2.ICSD_28744       | insulator  | insulator |
| Ag1Al1Se2.ICSD_28745      | insulator  | insulator |
| Ag1Al1Te2.ICSD_28746      | insulator  | insulator |
| Ag1Al2Pr1.ICSD_604688     | metal      | metal     |
| Ag1As1Ba1.ICSD_8278       | metal      | metal     |
| Ag1As1C4F6N4S8.ICSD_61131 | insulator  | insulator |
| Ag1As1Ca1.ICSD_10017      | metal      | metal     |
| Ag1As1Eu1.ICSD_24365      | metal      | metal     |
| Ag1As1F6Se3.ICSD_418700   | insulator  | insulator |
| Ag1As1F7.ICSD_62510       | insulator  | insulator |
| Ag1As1Hg1S3.ICSD_31194    | insulator  | insulator |
| Ag1As1Hg2O4.ICSD_413087   | insulator  | insulator |
| Ag1As1K2.ICSD_1154        | insulator  | insulator |
| Ag1As1Mg1.ICSD_655132     | metal      | metal     |
| Ag1As1Na2.ICSD_49007      | insulator  | insulator |
| Ag1As1O1Th1.ICSD_183138   | metal      | metal     |
| Ag1As1Pb1S3.ICSD_26835    | insulator  | insulator |
| Ag1As1S1.ICSD_604740      | metal      | insulator |
| Ag1As1S2.ICSD_18101       | insulator  | insulator |
| Ag1As1Se1.ICSD_604753     | metal      | metal     |
| Ag1As1Se2.ICSD_61708      | insulator  | insulator |
| Ag1As1Sr1.ICSD_49742      | metal      | insulator |
| Ag1As1Zn1.ICSD_604767     | metal      | metal     |
| Ag1As2Ce1.ICSD_93150      | metal      | metal     |
| Ag1As2Nd1.ICSD_174360     | metal      | metal     |
| Ag1As2Pr1.ICSD_412816     | metal      | metal     |
| Ag1As2Sm1.ICSD_174361     | metal      | metal     |
| Ag1Au1Ba4O6.ICSD_72329    | insulator  | insulator |
| Ag1Au1Cd2.ICSD_57337      | metal      | metal     |
| Ag1Au1Cl4.ICSD_1152       | insulator  | insulator |
| Ag1Au1Cl6Cs2.ICSD_24516   | metal      | insulator |
| Ag1Au1Cl6Cs2.ICSD_26162   | insulator  | insulator |
| Ag1Au1F4.ICSD_90071       | insulator  | insulator |
| Ag1Au1Te2.ICSD_55250      | metal      | metal     |

Supplementary Table 9. Five-fold cross validated predictions for the metal/insulator classification (1/598).

| system                   | calculated | predicted |
|--------------------------|------------|-----------|
| Ag1Au1Te4.ICSD_30874     | metal      | metal     |
| Ag1Au1Zn2.ICSD_57340     | metal      | metal     |
| Ag1Au2F8.ICSD_85416      | insulator  | insulator |
| Ag1Au3I8Rb2.ICSD_32031   | insulator  | insulator |
| Ag1B1C4N4.ICSD_411179    | insulator  | insulator |
| Ag1B1F4.ICSD_415320      | insulator  | insulator |
| Ag1B1F5.ICSD_80645       | insulator  | insulator |
| Ag1B2.ICSD_604797        | metal      | metal     |
| Ag1B7O12Sr1.ICSD_406544  | insulator  | insulator |
| Ag1Ba1Bi1.ICSD_56978     | metal      | metal     |
| Ag1Ba1Er1S3.ICSD_75074   | insulator  | insulator |
| Ag1Ba1Er1Se3.ICSD_659171 | insulator  | insulator |
| Ag1Ba1F1S1.ICSD_183713   | insulator  | insulator |
| Ag1Ba1F1Se1.ICSD_183714  | insulator  | insulator |
| Ag1Ba1F1Te1.ICSD_419382  | insulator  | insulator |
| Ag1Ba1La1Se3.ICSD_659172 | insulator  | insulator |
| Ag1Ba1Nd1S3.ICSD_659170  | insulator  | insulator |
| Ag1Ba1O9P3.ICSD_50672    | insulator  | insulator |
| Ag1Ba1P1.ICSD_41706      | insulator  | metal     |
| Ag1Ba1Sb1.ICSD_56981     | metal      | metal     |
| Ag1Ba1Se3Y1.ICSD_104237  | insulator  | insulator |
| Ag1Ba1Te3Y1.ICSD_88717   | insulator  | insulator |
| Ag1Ba1.ICSD_57342        | metal      | metal     |
| Ag1Be12.ICSD_109313      | metal      | metal     |
| Ag1Be2.ICSD_604819       | metal      | metal     |
| Ag1Bi1Ca1.ICSD_416283    | metal      | metal     |
| Ag1Bi1Ca1.ICSD_659377    | metal      | metal     |
| Ag1Bi1Cl2S1.ICSD_413290  | insulator  | insulator |
| Ag1Bi1Cr2O8.ICSD_8224    | insulator  | insulator |
| Ag1Bi1Cr4O14.ICSD_14234  | insulator  | insulator |
| Ag1Bi1Eu1.ICSD_57348     | metal      | metal     |
| Ag1Bi1K2.ICSD_1156       | insulator  | insulator |
| Ag1Bi1Li2.ICSD_57350     | metal      | metal     |
| Ag1Bi1O3.ICSD_89432      | metal      | insulator |
| Ag1Bi1P2S6.ICSD_170639   | insulator  | insulator |
| Ag1Bi1S2.ICSD_44340      | insulator  | insulator |
| Ag1Bi1Se2.ICSD_26518     | insulator  | insulator |
| Ag1Bi1Se2.ICSD_26519     | insulator  | insulator |
| Ag1Bi1Se2.ICSD_604856    | insulator  | insulator |
| Ag1Bi1Sr1.ICSD_57019     | metal      | metal     |
| Ag1Bi1Te2.ICSD_159345    | metal      | insulator |
| Ag1Bi1Te2.ICSD_43266     | insulator  | metal     |
| Ag1Bi1Te2.ICSD_604866    | insulator  | metal     |
| Ag1Bi1Yb1.ICSD_604874    | metal      | metal     |
| Ag1Bi2Cl1S3.ICSD_412372  | insulator  | insulator |
| Ag1Bi2Cl1Se3.ICSD_412371 | insulator  | insulator |
| Ag1Bi3S5.ICSD_171229     | insulator  | metal     |
| Ag1Bi6S9.ICSD_69456      | metal      | insulator |
| Ag1Br13Mo6.ICSD_412903   | insulator  | insulator |
| Ag1Br14W6.ICSD_410958    | insulator  | insulator |

Supplementary Table 10. Five-fold cross validated predictions for the metal/insulator classification (2/598).

| system                     | calculated | predicted |
|----------------------------|------------|-----------|
| Ag1Br1H3N1.ICSD.169137     | insulator  | insulator |
| Ag1Br1Hg1S1.ICSD.411773    | insulator  | insulator |
| Ag1Br1O1Pb1.ICSD.33913     | insulator  | insulator |
| Ag1Br1.ICSD.157536         | insulator  | insulator |
| Ag1Br1.ICSD.56550          | insulator  | insulator |
| Ag1Br3Cs2.ICSD.150288      | insulator  | insulator |
| Ag1Br3Rb2.ICSD.150287      | insulator  | insulator |
| Ag1Br5Pb2.ICSD.300100      | insulator  | insulator |
| Ag1C1H3N2.ICSD.169135      | insulator  | insulator |
| Ag1C1N1O1.ICSD.18149       | insulator  | insulator |
| Ag1C1N1O1.ICSD.23832       | insulator  | insulator |
| Ag1C1N1O1.ICSD.23833       | insulator  | insulator |
| Ag1C1N1O1.ICSD.260378      | insulator  | insulator |
| Ag1C1N1O1.ICSD.27678       | metal      | insulator |
| Ag1C1N1.ICSD.85783         | insulator  | insulator |
| Ag1C1N3O2.ICSD.408288      | insulator  | insulator |
| Ag1C1.ICSD.181772          | metal      | metal     |
| Ag1C1.ICSD.183175          | metal      | metal     |
| Ag1C2Cl2F6N2Sb1.ICSD.64638 | insulator  | insulator |
| Ag1C2Cs1.ICSD.410873       | insulator  | insulator |
| Ag1C2F6H2N2Sb1.ICSD.63287  | insulator  | insulator |
| Ag1C2H2N3O1.ICSD.63100     | insulator  | insulator |
| Ag1C2K1N2S2.ICSD.280587    | insulator  | insulator |
| Ag1C2K1N2.ICSD.30275       | insulator  | insulator |
| Ag1C2K1.ICSD.410874        | insulator  | insulator |
| Ag1C2Li1.ICSD.410868       | insulator  | insulator |
| Ag1C2N2Na1.ICSD.65697      | insulator  | insulator |
| Ag1C2N3.ICSD.68453         | insulator  | insulator |
| Ag1C2N3.ICSD.843           | insulator  | insulator |
| Ag1C4H12N1Se5.ICSD.159458  | insulator  | insulator |
| Ag1C4N3.ICSD.43823         | insulator  | insulator |
| Ag1Ca1Ge1.ICSD.421236      | metal      | metal     |
| Ag1Ca1P1.ICSD.10016        | metal      | insulator |
| Ag1Ca1Sb1.ICSD.5982        | insulator  | metal     |
| Ag1Ca1.ICSD.57352          | metal      | metal     |
| Ag1Cd1O4V1.ICSD.401350     | insulator  | insulator |
| Ag1Cd1Sb1.ICSD.52549       | metal      | metal     |
| Ag1Cd1.ICSD.604906         | metal      | metal     |
| Ag1Cd2Ce1.ICSD.57363       | metal      | metal     |
| Ag1Cd2Ga1S4.ICSD.90459     | insulator  | insulator |
| Ag1Cd3F20Hf3.ICSD.78893    | metal      | insulator |
| Ag1Cd3F20Zr3.ICSD.78892    | metal      | insulator |
| Ag1Ce1Cu5.ICSD.657086      | metal      | metal     |
| Ag1Ce1Ge1.ICSD.56983       | metal      | metal     |
| Ag1Ce1Mg1.ICSD.657933      | metal      | metal     |
| Ag1Ce1Mg2.ICSD.57373       | metal      | metal     |
| Ag1Ce1Pb1.ICSD.107100      | metal      | metal     |
| Ag1Ce1Sb2.ICSD.79425       | metal      | metal     |
| Ag1Ce1Si2.ICSD.247421      | metal      | metal     |
| Ag1Ce1Sn1.ICSD.55819       | metal      | metal     |

Supplementary Table 11. Five-fold cross validated predictions for the metal/insulator classification (3/598).

| system                     | calculated | predicted |
|----------------------------|------------|-----------|
| Ag1Ce1.ICSD.57368          | metal      | metal     |
| Ag1Ce1.ICSD.604941         | metal      | metal     |
| Ag1Ce3Ge1S7.ICSD.604947    | insulator  | insulator |
| Ag1Ce3S7Si1.ICSD.604959    | insulator  | insulator |
| Ag1Ce3Se7Si1.ICSD.604962   | insulator  | insulator |
| Ag1Cl1O2.ICSD.15407        | insulator  | insulator |
| Ag1Cl1O2.ICSD.16717        | insulator  | insulator |
| Ag1Cl1O3.ICSD.30227        | insulator  | insulator |
| Ag1Cl1O4Pb4.ICSD.68309     | insulator  | insulator |
| Ag1Cl1O4.ICSD.185363       | insulator  | insulator |
| Ag1Cl1O4.ICSD.185366       | insulator  | insulator |
| Ag1Cl1O4.ICSD.185367       | insulator  | insulator |
| Ag1Cl1O4.ICSD.33568        | insulator  | insulator |
| Ag1Cl1.ICSD.56539          | insulator  | insulator |
| Ag1Cl1.ICSD.56543          | insulator  | insulator |
| Ag1Cl1.ICSD.56545          | insulator  | insulator |
| Ag1Cl2Cs1.ICSD.150300      | insulator  | insulator |
| Ag1Cl3Cs2.ICSD.150286      | insulator  | insulator |
| Ag1Cl3Rb2.ICSD.280031      | insulator  | insulator |
| Ag1Co1O2.ICSD.180888       | insulator  | insulator |
| Ag1Co1O2.ICSD.180889       | metal      | insulator |
| Ag1Co1O2.ICSD.187261       | insulator  | insulator |
| Ag1Co1O2.ICSD.261608       | insulator  | insulator |
| Ag1Co1O4P1.ICSD.100520     | insulator  | insulator |
| Ag1Co3H2O12P3.ICSD.280774  | insulator  | insulator |
| Ag1Cr1O2.ICSD.4149         | insulator  | insulator |
| Ag1Cr1S2.ICSD.25628        | metal      | insulator |
| Ag1Cr1S2.ICSD.42395        | insulator  | metal     |
| Ag1Cr1Se2.ICSD.25626       | metal      | metal     |
| Ag1Cr1Se2.ICSD.68423       | insulator  | metal     |
| Ag1Cr1Te2.ICSD.605002      | metal      | metal     |
| Ag1Cr2H4O10Sc1.ICSD.156676 | insulator  | insulator |
| Ag1Cr2Te4.ICSD.71695       | metal      | metal     |
| Ag1Cr3O8.ICSD.155507       | insulator  | insulator |
| Ag1Cs1F3.ICSD.23154        | insulator  | insulator |
| Ag1Cs1N2O6.ICSD.280069     | insulator  | insulator |
| Ag1Cs1O1.ICSD.25745        | insulator  | insulator |
| Ag1Cs1O1.ICSD.40160        | insulator  | insulator |
| Ag1Cs1O1.ICSD.49754        | insulator  | insulator |
| Ag1Cs1Se4.ICSD.87464       | insulator  | insulator |
| Ag1Cs2F4.ICSD.16254        | insulator  | insulator |
| Ag1Cs2F6K1.ICSD.16783      | insulator  | insulator |
| Ag1Cs2I3.ICSD.150291       | insulator  | insulator |
| Ag1Cs2S4V1.ICSD.50460      | insulator  | insulator |
| Ag1Cs5O9Si3.ICSD.51508     | insulator  | insulator |
| Ag1Cu1O2.ICSD.95089        | insulator  | metal     |
| Ag1Cu1O4P1.ICSD.165596     | insulator  | insulator |
| Ag1Cu1O4P1.ICSD.35590      | insulator  | insulator |
| Ag1Cu1O4V1.ICSD.419201     | insulator  | insulator |
| Ag1Cu1S1.ICSD.30233        | insulator  | insulator |

Supplementary Table 12. Five-fold cross validated predictions for the metal/insulator classification (4/598).

| system                  | calculated | predicted |
|-------------------------|------------|-----------|
| Ag1Cu1S1.ICSD.66580     | insulator  | insulator |
| Ag1Cu1S1.ICSD.66582     | insulator  | insulator |
| Ag1Cu1Te2.ICSD.42482    | metal      | metal     |
| Ag1Cu4Dy1.ICSD.605006   | metal      | metal     |
| Ag1Cu4Er1.ICSD.605007   | metal      | metal     |
| Ag1Cu4Gd1.ICSD.605020   | metal      | metal     |
| Ag1Cu4Ho1.ICSD.605023   | metal      | metal     |
| Ag1Cu4Nd1.ICSD.605036   | metal      | metal     |
| Ag1Cu4Tb1.ICSD.605048   | metal      | metal     |
| Ag1Cu4Tm1.ICSD.605053   | metal      | metal     |
| Ag1Cu4U1.ICSD.603921    | metal      | metal     |
| Ag1Cu4Yb1.ICSD.605057   | metal      | metal     |
| Ag1Dy1Ge1.ICSD.605077   | metal      | metal     |
| Ag1Dy1Ge1.ICSD.86731    | metal      | metal     |
| Ag1Dy1Mg1.ICSD.657937   | metal      | metal     |
| Ag1Dy1Pb1.ICSD.107106   | metal      | metal     |
| Ag1Dy1Sb2.ICSD.95133    | metal      | metal     |
| Ag1Dy1Se2.ICSD.605083   | insulator  | insulator |
| Ag1Dy1Se2.ICSD.605084   | insulator  | insulator |
| Ag1Dy1Si1.ICSD.605085   | metal      | metal     |
| Ag1Dy1Sn1.ICSD.55823    | metal      | metal     |
| Ag1Dy1Te2.ICSD.154794   | insulator  | insulator |
| Ag1Dy1.ICSD.150538      | metal      | metal     |
| Ag1Er1Ge1.ICSD.81558    | metal      | metal     |
| Ag1Er1Ge1.ICSD.86733    | metal      | metal     |
| Ag1Er1Mg1.ICSD.657938   | metal      | metal     |
| Ag1Er1O8W2.ICSD.27743   | insulator  | insulator |
| Ag1Er1P2Se6.ICSD.420303 | insulator  | insulator |
| Ag1Er1Pb1.ICSD.107276   | metal      | metal     |
| Ag1Er1S2.ICSD.423921    | insulator  | insulator |
| Ag1Er1Se2.ICSD.605115   | insulator  | insulator |
| Ag1Er1Si1.ICSD.605116   | metal      | metal     |
| Ag1Er1Sn1.ICSD.417551   | metal      | metal     |
| Ag1Er1Sn1.ICSD.55825    | metal      | metal     |
| Ag1Er1Te2.ICSD.154791   | insulator  | insulator |
| Ag1Er1.ICSD.605102      | metal      | metal     |
| Ag1Eu1O4Ti1.ICSD.78720  | metal      | insulator |
| Ag1Eu1P1.ICSD.52567     | metal      | metal     |
| Ag1Eu1Sb1.ICSD.52568    | metal      | metal     |
| Ag1Eu1.ICSD.58257       | metal      | metal     |
| Ag1F10P1Xe2.ICSD.412662 | insulator  | insulator |
| Ag1F11Na1Zr2.ICSD.65179 | insulator  | insulator |
| Ag1F11Pd1Zr2.ICSD.65181 | insulator  | insulator |
| Ag1F12Sb2.ICSD.65186    | insulator  | insulator |
| Ag1F12Ta2.ICSD.62543    | insulator  | insulator |
| Ag1F1S1Sr1.ICSD.183709  | insulator  | insulator |
| Ag1F1Se1Sr1.ICSD.183710 | insulator  | insulator |
| Ag1F1Sr1Te1.ICSD.183711 | insulator  | insulator |
| Ag1F1.ICSD.18008        | insulator  | metal     |
| Ag1F2O6S2.ICSD.422414   | insulator  | insulator |

Supplementary Table 13. Five-fold cross validated predictions for the metal/insulator classification (5/598).

| system                        | calculated | predicted |
|-------------------------------|------------|-----------|
| Ag1F2.ICSD.20453              | metal      | insulator |
| Ag1F2.ICSD.6277               | insulator  | insulator |
| Ag1F30O6S16Sb1Te6.ICSD.412325 | insulator  | insulator |
| Ag1F3K1.ICSD.189150           | insulator  | insulator |
| Ag1F3Rb1.ICSD.23153           | insulator  | insulator |
| Ag1F3Zn1.ICSD.28950           | insulator  | insulator |
| Ag1F3.ICSD.80477              | insulator  | insulator |
| Ag1F4K1.ICSD.72715            | insulator  | insulator |
| Ag1F4K2.ICSD.421461           | insulator  | insulator |
| Ag1F4Na1.ICSD.9903            | insulator  | insulator |
| Ag1F4Na2.ICSD.425149          | insulator  | insulator |
| Ag1F6Pd1.ICSD.51507           | insulator  | insulator |
| Ag1F6Sb1.ICSD.28676           | insulator  | insulator |
| Ag1F6Sn1.ICSD.51505           | insulator  | insulator |
| Ag1F6Ta1.ICSD.411796          | insulator  | insulator |
| Ag1F6Ti1.ICSD.51506           | insulator  | insulator |
| Ag1F7Ir1.ICSD.79880           | metal      | insulator |
| Ag1Fe1O2.ICSD.2786            | metal      | metal     |
| Ag1Fe1O2.ICSD.31919           | metal      | metal     |
| Ag1Fe1O6Se2.ICSD.90414        | insulator  | insulator |
| Ag1Fe1O7P2.ICSD.421413        | insulator  | insulator |
| Ag1Fe1O7V2.ICSD.166891        | insulator  | insulator |
| Ag1Fe1S2.ICSD.156643          | metal      | insulator |
| Ag1Fe1S2.ICSD.56263           | metal      | insulator |
| Ag1Fe1Te2.ICSD.43278          | metal      | metal     |
| Ag1Fe2S3.ICSD.165661          | insulator  | metal     |
| Ag1Ga1O2.ICSD.95665           | insulator  | insulator |
| Ag1Ga1P2Se6.ICSD.71971        | insulator  | insulator |
| Ag1Ga1S2.ICSD.156785          | insulator  | insulator |
| Ag1Ga1S2.ICSD.92052           | insulator  | insulator |
| Ag1Ga1Se2.ICSD.605211         | insulator  | insulator |
| Ag1Ga1Te2.ICSD.156128         | insulator  | insulator |
| Ag1Ga1.ICSD.104466            | metal      | metal     |
| Ag1Gd1Ge1.ICSD.81556          | metal      | metal     |
| Ag1Gd1Mg1.ICSD.657936         | metal      | metal     |
| Ag1Gd1Mg2.ICSD.107733         | metal      | metal     |
| Ag1Gd1Pb1.ICSD.107104         | metal      | metal     |
| Ag1Gd1Se2.ICSD.602138         | insulator  | insulator |
| Ag1Gd1Si1.ICSD.605275         | metal      | metal     |
| Ag1Gd1.ICSD.605255            | metal      | metal     |
| Ag1Ge1Ho1.ICSD.86732          | metal      | metal     |
| Ag1Ge1La1.ICSD.56985          | metal      | metal     |
| Ag1Ge1La3S7.ICSD.80174        | insulator  | insulator |
| Ag1Ge1Pr3S7.ICSD.605303       | insulator  | insulator |
| Ag1Ge1Tb1.ICSD.86730          | metal      | metal     |
| Ag1Ge1Yb1.ICSD.402450         | metal      | metal     |
| Ag1H2Ni3O12P3.ICSD.280922     | insulator  | insulator |
| Ag1H2O4V1.ICSD.75941          | insulator  | insulator |
| Ag1H4Mo1N1S4.ICSD.236249      | insulator  | insulator |
| Ag1H4N1S4W1.ICSD.84370        | insulator  | insulator |

Supplementary Table 14. Five-fold cross validated predictions for the metal/insulator classification (6/598).

| system                   | calculated | predicted |
|--------------------------|------------|-----------|
| Ag1Hf1Rb1Te3.ICSD_402632 | insulator  | insulator |
| Ag1Hf1.ICSD_605330       | metal      | metal     |
| Ag1Hf2.ICSD_163152       | metal      | metal     |
| Ag1Hg1I1S1.ICSD_411772   | insulator  | insulator |
| Ag1Hg1I1S1.ICSD_54796    | insulator  | insulator |
| Ag1Hg1O4V1.ICSD_414429   | insulator  | insulator |
| Ag1Hg2N1O5.ICSD_89685    | insulator  | insulator |
| Ag1Hg2O4P1.ICSD_2208     | insulator  | insulator |
| Ag1Hg2Ti1.ICSD_58276     | metal      | metal     |
| Ag1Hg3O6Sb1.ICSD_170764  | insulator  | insulator |
| Ag1Ho1Pb1.ICSD_107107    | metal      | metal     |
| Ag1Ho1S2.ICSD_40960      | insulator  | insulator |
| Ag1Ho1Se2.ICSD_156419    | insulator  | insulator |
| Ag1Ho1Se2.ICSD_605365    | insulator  | insulator |
| Ag1Ho1Sn1.ICSD_55824     | metal      | metal     |
| Ag1Ho1Te2.ICSD_154795    | insulator  | insulator |
| Ag1Ho1.ICSD_605352       | metal      | metal     |
| Ag1I1O4.ICSD_52380       | insulator  | insulator |
| Ag1I1Se3.ICSD_414116     | insulator  | insulator |
| Ag1I1Te3.ICSD_414117     | insulator  | insulator |
| Ag1I1.ICSD_161581        | insulator  | insulator |
| Ag1I1.ICSD_161582        | insulator  | insulator |
| Ag1I1.ICSD_164959        | insulator  | insulator |
| Ag1I1.ICSD_1899          | insulator  | insulator |
| Ag1I1.ICSD_28230         | insulator  | insulator |
| Ag1I1.ICSD_52361         | insulator  | insulator |
| Ag1I1.ICSD_56557         | insulator  | insulator |
| Ag1I1.ICSD_79678         | insulator  | insulator |
| Ag1I2Tl1.ICSD_26318      | insulator  | insulator |
| Ag1I3K2.ICSD_150289      | insulator  | insulator |
| Ag1I3O9Pd1.ICSD_174519   | insulator  | insulator |
| Ag1I3Rb2.ICSD_150290     | insulator  | insulator |
| Ag1I3Tl2.ICSD_78929      | insulator  | insulator |
| Ag1In1Li2.ICSD_58292     | metal      | metal     |
| Ag1In1O2.ICSD_202429     | insulator  | insulator |
| Ag1In1O2.ICSD_95671      | insulator  | insulator |
| Ag1In1P2Se6.ICSD_71968   | insulator  | insulator |
| Ag1In1S2.ICSD_600585     | insulator  | insulator |
| Ag1In1S2.ICSD_605408     | insulator  | insulator |
| Ag1In1S2.ICSD_659385     | insulator  | insulator |
| Ag1In1Se2.ICSD_604401    | metal      | insulator |
| Ag1In1Se2.ICSD_605449    | insulator  | insulator |
| Ag1In1Te2.ICSD_104476    | insulator  | insulator |
| Ag1In1.ICSD_605384       | metal      | metal     |
| Ag1In2Na3.ICSD_170868    | metal      | metal     |
| Ag1In2.ICSD_58282        | metal      | metal     |
| Ag1In2.ICSD_659383       | metal      | metal     |
| Ag1In5Se8.ICSD_35597     | insulator  | insulator |
| Ag1In5Te8.ICSD_151871    | insulator  | insulator |
| Ag1K1O1.ICSD_188532      | metal      | metal     |

Supplementary Table 15. Five-fold cross validated predictions for the metal/insulator classification (7/598).

| system                   | calculated | predicted |
|--------------------------|------------|-----------|
| Ag1K1O1.ICSD_24818       | insulator  | insulator |
| Ag1K1O1.ICSD_25744       | insulator  | insulator |
| Ag1K2Nb1S4.ICSD_84292    | insulator  | insulator |
| Ag1K2P1.ICSD_402572      | insulator  | insulator |
| Ag1K2S4Sb1.ICSD_82144    | insulator  | insulator |
| Ag1K2S4Ta1.ICSD_84294    | insulator  | insulator |
| Ag1K2S4V1.ICSD_66840     | insulator  | insulator |
| Ag1K2Sb1.ICSD_11155      | insulator  | insulator |
| Ag1K2Se4V1.ICSD_50461    | insulator  | insulator |
| Ag1K3Se8Sn3.ICSD_416330  | insulator  | insulator |
| Ag1La1Mg1.ICSD_657932    | metal      | metal     |
| Ag1La1O1S1.ICSD_89023    | insulator  | insulator |
| Ag1La1Pb1.ICSD_107099    | metal      | metal     |
| Ag1La1Sb2.ICSD_95223     | metal      | metal     |
| Ag1La1.ICSD_150963       | metal      | metal     |
| Ag1La1.ICSD_58306        | metal      | metal     |
| Ag1La3S7Si1.ICSD_409845  | insulator  | insulator |
| Ag1La3S7Sn1.ICSD_417316  | insulator  | insulator |
| Ag1La3Se7Si1.ICSD_605509 | insulator  | insulator |
| Ag1La3Se7Sn1.ICSD_417803 | insulator  | insulator |
| Ag1Li1.ICSD_247145       | metal      | metal     |
| Ag1Li1.ICSD_58310        | metal      | metal     |
| Ag1Li2Pb1.ICSD_58314     | metal      | metal     |
| Ag1Li2Sb1.ICSD_52589     | insulator  | insulator |
| Ag1Li2Sn1.ICSD_58317     | metal      | metal     |
| Ag1Li2Sn1.ICSD_58318     | metal      | metal     |
| Ag1Lu1Pb1.ICSD_107278    | metal      | metal     |
| Ag1Lu1Se2.ICSD_605535    | insulator  | insulator |
| Ag1Lu1Si1.ICSD_605536    | metal      | metal     |
| Ag1Lu1Sn1.ICSD_245236    | metal      | metal     |
| Ag1Lu1Sn1.ICSD_416377    | metal      | metal     |
| Ag1Mg1Pr1.ICSD_657934    | metal      | metal     |
| Ag1Mg1Sb1.ICSD_187149    | metal      | metal     |
| Ag1Mg1Sb1.ICSD_187150    | metal      | metal     |
| Ag1Mg1Sb1.ICSD_187151    | metal      | metal     |
| Ag1Mg1Sm1.ICSD_657935    | metal      | metal     |
| Ag1Mg1Y1.ICSD_104477     | metal      | metal     |
| Ag1Mg1.ICSD_605538       | metal      | metal     |
| Ag1Mg2Nd1.ICSD_110801    | metal      | metal     |
| Ag1Mg2Pr1.ICSD_58329     | metal      | metal     |
| Ag1Mg2Sm1.ICSD_58330     | metal      | metal     |
| Ag1Mn1O4V1.ICSD_246202   | insulator  | insulator |
| Ag1Mn1O4.ICSD_30200      | insulator  | insulator |
| Ag1Mn3N1.ICSD_52592      | metal      | metal     |
| Ag1Mo3O14P2.ICSD_74937   | metal      | insulator |
| Ag1Mo3Se3.ICSD_603624    | metal      | metal     |
| Ag1Mo6S8.ICSD_600661     | metal      | metal     |
| Ag1Mo6Se8.ICSD_605584    | metal      | metal     |
| Ag1Mo6Te6.ICSD_40793     | metal      | metal     |
| Ag1N1O2.ICSD_26750       | insulator  | insulator |

Supplementary Table 16. Five-fold cross validated predictions for the metal/insulator classification (8/598).

| system                   | calculated | predicted |
|--------------------------|------------|-----------|
| Ag1N1O3.ICSD.1685        | insulator  | insulator |
| Ag1N1O3.ICSD.28103       | insulator  | insulator |
| Ag1N1O3.ICSD.35157       | insulator  | insulator |
| Ag1N1O3.ICSD.374         | insulator  | insulator |
| Ag1N1.ICSD.167874        | metal      | metal     |
| Ag1N1.ICSD.185555        | metal      | metal     |
| Ag1N1.ICSD.185565        | metal      | metal     |
| Ag1N1.ICSD.185575        | metal      | metal     |
| Ag1N2Na1O4.ICSD.20926    | insulator  | insulator |
| Ag1N3O4.ICSD.419628      | insulator  | insulator |
| Ag1N3.ICSD.183201        | insulator  | insulator |
| Ag1N3.ICSD.27135         | insulator  | insulator |
| Ag1Na1O1.ICSD.188524     | insulator  | insulator |
| Ag1Na1O1.ICSD.188531     | metal      | metal     |
| Ag1Na1O3S2.ICSD.418297   | insulator  | insulator |
| Ag1Na2Sb1.ICSD.10010     | insulator  | insulator |
| Ag1Na3O2.ICSD.24817      | insulator  | insulator |
| Ag1Na3S2.ICSD.201800     | insulator  | insulator |
| Ag1Nb1O3.ICSD.164198     | insulator  | insulator |
| Ag1Nb1O3.ICSD.55647      | insulator  | insulator |
| Ag1Nb1O3.ICSD.55649      | insulator  | metal     |
| Ag1Nb1Rb2S4.ICSD.50463   | insulator  | insulator |
| Ag1Nb1Rb2Se4.ICSD.402423 | insulator  | insulator |
| Ag1Nb3O8.ICSD.67244      | insulator  | insulator |
| Ag1Nb3S4.ICSD.605592     | metal      | metal     |
| Ag1Nb3Te4.ICSD.605595    | metal      | metal     |
| Ag1Nd1Pb1.ICSD.107102    | metal      | metal     |
| Ag1Nd1Sn1.ICSD.155736    | metal      | metal     |
| Ag1Nd1Sn1.ICSD.55821     | metal      | metal     |
| Ag1Nd1.ICSD.605598       | metal      | metal     |
| Ag1Ni1O2.ICSD.415451     | metal      | insulator |
| Ag1Ni1O2.ICSD.73974      | metal      | metal     |
| Ag1Ni1Se2.ICSD.605616    | metal      | metal     |
| Ag1Ni1Te2.ICSD.605619    | metal      | metal     |
| Ag1O13P4Ta1.ICSD.86892   | insulator  | insulator |
| Ag1O1P1Th1.ICSD.183137   | metal      | insulator |
| Ag1O1P1Th1.ICSD.419463   | insulator  | metal     |
| Ag1O1Rb1.ICSD.188526     | insulator  | insulator |
| Ag1O1Rb1.ICSD.188533     | metal      | insulator |
| Ag1O1Rb1.ICSD.40155      | insulator  | insulator |
| Ag1O1.ICSD.202055        | insulator  | metal     |
| Ag1O1.ICSD.27667         | metal      | insulator |
| Ag1O1.ICSD.35662         | metal      | metal     |
| Ag1O1.ICSD.43741         | insulator  | insulator |
| Ag1O2Rh1.ICSD.261561     | insulator  | insulator |
| Ag1O2Sc1.ICSD.422442     | insulator  | insulator |
| Ag1O2Sc1.ICSD.95668      | insulator  | insulator |
| Ag1O2Y1.ICSD.95674       | insulator  | insulator |
| Ag1O2Yb1.ICSD.163472     | insulator  | insulator |
| Ag1O3Sb1.ICSD.245292     | insulator  | insulator |

Supplementary Table 17. Five-fold cross validated predictions for the metal/insulator classification (9/598).

| system                   | calculated | predicted |
|--------------------------|------------|-----------|
| Ag1O3Sb1.ICSD.25541      | insulator  | insulator |
| Ag1O3Ta1.ICSD.40830      | insulator  | insulator |
| Ag1O3Ta1.ICSD.40831      | insulator  | insulator |
| Ag1O3Te1Ti1.ICSD.169995  | insulator  | insulator |
| Ag1O3V1.ICSD.50645       | insulator  | insulator |
| Ag1O3V1.ICSD.82079       | insulator  | insulator |
| Ag1O4P1Zn1.ICSD.260974   | insulator  | insulator |
| Ag1O4Re1.ICSD.280086     | insulator  | insulator |
| Ag1O4Tc1.ICSD.281321     | insulator  | insulator |
| Ag1O5Se1V1.ICSD.417773   | insulator  | insulator |
| Ag1O5Te1V1.ICSD.417774   | insulator  | insulator |
| Ag1O6Ti1V2.ICSD.201934   | insulator  | insulator |
| Ag1P1Pd5.ICSD.605631     | metal      | metal     |
| Ag1P1Pt5.ICSD.605633     | metal      | metal     |
| Ag1P1S3.ICSD.653748      | insulator  | insulator |
| Ag1P1S4Zn1.ICSD.48197    | insulator  | insulator |
| Ag1P1Sr1.ICSD.52596      | insulator  | metal     |
| Ag1P2S6Sc1.ICSD.63273    | insulator  | insulator |
| Ag1P2S6V1.ICSD.655222    | insulator  | insulator |
| Ag1P2Sc1Se6.ICSD.420302  | insulator  | insulator |
| Ag1P2Se6V1.ICSD.68143    | insulator  | insulator |
| Ag1P2.ICSD.35283         | insulator  | insulator |
| Ag1Pb1Pr1.ICSD.107101    | insulator  | metal     |
| Ag1Pb1S3Sb1.ICSD.24257   | insulator  | insulator |
| Ag1Pb1S3Sb1.ICSD.8166    | insulator  | insulator |
| Ag1Pb1Tb1.ICSD.107105    | metal      | metal     |
| Ag1Pb1Y1.ICSD.107275     | metal      | metal     |
| Ag1Pd3Se1.ICSD.174642    | metal      | metal     |
| Ag1Pr1Sn1.ICSD.55820     | metal      | metal     |
| Ag1Pr1.ICSD.605674       | metal      | metal     |
| Ag1Pr3S7Si1.ICSD.605682  | insulator  | insulator |
| Ag1Pr3Se7Si1.ICSD.605685 | insulator  | insulator |
| Ag1Pt3.ICSD.180887       | metal      | metal     |
| Ag1Pt5Si1.ICSD.605693    | metal      | metal     |
| Ag1Rb1S3U1.ICSD.249702   | insulator  | insulator |
| Ag1Rb1Se3U1.ICSD.249703  | insulator  | insulator |
| Ag1Rb1Se4.ICSD.87463     | insulator  | insulator |
| Ag1Rb2S4Ta1.ICSD.84295   | insulator  | insulator |
| Ag1Rb2S4V1.ICSD.66841    | insulator  | insulator |
| Ag1Rb2Se4V1.ICSD.50462   | insulator  | insulator |
| Ag1Rb3Se8Sn3.ICSD.416294 | insulator  | insulator |
| Ag1S1Ti1.ICSD.605754     | insulator  | insulator |
| Ag1S2Sb1.ICSD.16578      | insulator  | insulator |
| Ag1S2Sb1.ICSD.85130      | insulator  | insulator |
| Ag1S2Sb1.ICSD.94647      | insulator  | insulator |
| Ag1S2Yb1.ICSD.27090      | metal      | metal     |
| Ag1S2Yb1.ICSD.27091      | metal      | metal     |
| Ag1S3Ta1.ICSD.73804      | metal      | insulator |
| Ag1S3Ta1.ICSD.74442      | metal      | insulator |
| Ag1Sb1Sr1.ICSD.56990     | metal      | metal     |

Supplementary Table 18. Five-fold cross validated predictions for the metal/insulator classification (10/598).

| system                | calculated | predicted |
|-----------------------|------------|-----------|
| Ag1Sb1Te2.ICSD_000000 | metal      | metal     |
| Ag1Sb1Te2.ICSD_100000 | metal      | metal     |
| Ag1Sb1Te2.ICSD_170662 | metal      | metal     |
| Ag1Sb1Te2.ICSD_170663 | metal      | metal     |
| Ag1Sb1Te2.ICSD_200000 | metal      | metal     |
| Ag1Sb1Te2.ICSD_300000 | metal      | metal     |
| Ag1Sb1Te2.ICSD_400000 | metal      | metal     |
| Ag1Sb1Te2.ICSD_604040 | metal      | insulator |
| Ag1Sb1Te2.ICSD_704040 | insulator  | metal     |
| Ag1Sb1Yb1.ICSD_83983  | metal      | metal     |
| Ag1Sb3Zr5.ICSD_605789 | metal      | metal     |
| Ag1Sc1Se2.ICSD_155115 | insulator  | insulator |
| Ag1Sc1Se2.ICSD_605797 | insulator  | insulator |
| Ag1Sc1.ICSD_58348     | metal      | metal     |
| Ag1Sc6Te2.ICSD_94859  | metal      | metal     |
| Ag1Se1Ti1.ICSD_100710 | insulator  | insulator |
| Ag1Se1.ICSD_605802    | metal      | metal     |
| Ag1Se2Tb1.ICSD_605827 | insulator  | insulator |
| Ag1Se2Ti1.ICSD_30360  | metal      | insulator |
| Ag1Se2Y1.ICSD_605836  | insulator  | insulator |
| Ag1Se2Yb1.ICSD_605837 | metal      | insulator |
| Ag1Si1Sm1.ICSD_605842 | metal      | metal     |
| Ag1Si1Tm1.ICSD_169472 | metal      | metal     |
| Ag1Si1Tm1.ICSD_605849 | metal      | metal     |
| Ag1Si1Y1.ICSD_605850  | metal      | metal     |
| Ag1Si1Yb1.ICSD_52606  | metal      | metal     |
| Ag1Sm1.ICSD_605855    | metal      | metal     |
| Ag1Sn1Tb1.ICSD_55822  | metal      | metal     |
| Ag1Sn1Tm1.ICSD_417550 | metal      | metal     |
| Ag1Sn1Y1.ICSD_245234  | metal      | metal     |
| Ag1Sn1Yb1.ICSD_410744 | metal      | metal     |
| Ag1Sr1.ICSD_173623    | metal      | metal     |
| Ag1Sr1.ICSD_58358     | metal      | metal     |
| Ag1Tb1Te2.ICSD_154793 | insulator  | insulator |
| Ag1Tb1.ICSD_58363     | metal      | metal     |
| Ag1Tb1.ICSD_58364     | metal      | metal     |
| Ag1Te1Ti1.ICSD_23367  | metal      | insulator |
| Ag1Te1Ti1.ICSD_52609  | insulator  | metal     |
| Ag1Te2Ti1.ICSD_43284  | metal      | metal     |
| Ag1Te2Ti3.ICSD_61680  | insulator  | insulator |
| Ag1Te2Tm1.ICSD_156301 | metal      | metal     |
| Ag1Te2Y1.ICSD_154792  | insulator  | insulator |
| Ag1Te2Y6.ICSD_160181  | metal      | metal     |
| Ag1Te3.ICSD_37186     | metal      | metal     |
| Ag1Th2.ICSD_150643    | metal      | metal     |
| Ag1Ti1.ICSD_58369     | metal      | metal     |
| Ag1Ti1.ICSD_605934    | metal      | metal     |
| Ag1Ti2.ICSD_605935    | metal      | metal     |
| Ag1Ti3.ICSD_58370     | metal      | metal     |
| Ag1Tm1.ICSD_58372     | metal      | metal     |

Supplementary Table 19. Five-fold cross validated predictions for the metal/insulator classification (11/598).

| system                       | calculated | predicted |
|------------------------------|------------|-----------|
| Ag1Tm1.ICSD_605946           | metal      | metal     |
| Ag1Tm1.ICSD_605952           | metal      | metal     |
| Ag1Y1.ICSD_58376             | metal      | metal     |
| Ag1Yb1.ICSD_58378            | metal      | metal     |
| Ag1Yb1.ICSD_605970           | metal      | metal     |
| Ag1Zn1.ICSD_150570           | metal      | metal     |
| Ag1Zr1.ICSD_163155           | metal      | metal     |
| Ag1Zr2.ICSD_605999           | metal      | metal     |
| Ag1Zr3.ICSD_58392            | metal      | metal     |
| Ag1.ICSD_56269               | metal      | metal     |
| Ag1.ICSD_64707               | metal      | metal     |
| Ag1.ICSD_77917               | metal      | metal     |
| Ag2.67Cr1I0.67O4.ICSD_419833 | insulator  | insulator |
| Ag2Al1Sc1.ICSD_57333         | metal      | metal     |
| Ag2Al7Ca3.ICSD_104173        | metal      | metal     |
| Ag2As1Cs1S3.ICSD_421091      | insulator  | insulator |
| Ag2As1K1O4.ICSD_409793       | insulator  | insulator |
| Ag2As4Hg7I6.ICSD_391132      | insulator  | insulator |
| Ag2Ba1Ge1S4.ICSD_10040       | insulator  | insulator |
| Ag2Ba1Ge1Se4.ICSD_411405     | insulator  | insulator |
| Ag2Ba1Ge2.ICSD_25318         | metal      | metal     |
| Ag2Ba1Hg2O4.ICSD_40835       | insulator  | insulator |
| Ag2Ba1Mn1O8V2.ICSD_408193    | insulator  | insulator |
| Ag2Ba1S2.ICSD_50183          | insulator  | insulator |
| Ag2Ba1S4Sn1.ICSD_41898       | insulator  | insulator |
| Ag2Ba1Se4Sn1.ICSD_170856     | insulator  | insulator |
| Ag2Ba1Sn2.ICSD_25332         | metal      | metal     |
| Ag2Ba1Te2.ICSD_246048        | insulator  | insulator |
| Ag2Ba1.ICSD_240052           | metal      | metal     |
| Ag2Ba3.ICSD_108847           | metal      | metal     |
| Ag2Bi1O3.ICSD_410665         | metal      | insulator |
| Ag2Bi1O3.ICSD_415959         | insulator  | metal     |
| Ag2Br14W6.ICSD_410959        | insulator  | insulator |
| Ag2Br1N1O3.ICSD_1311         | insulator  | insulator |
| Ag2Br6Hg7P8.ICSD_171256      | insulator  | insulator |
| Ag2C1Cl1N1O4S1.ICSD_410623   | insulator  | insulator |
| Ag2C1N2.ICSD_411091          | insulator  | insulator |
| Ag2C1O3.ICSD_281040          | insulator  | insulator |
| Ag2C1O3.ICSD_93988           | insulator  | insulator |
| Ag2C2O4.ICSD_109603          | insulator  | insulator |
| Ag2C4Cs1Cu1N4.ICSD_415572    | insulator  | insulator |
| Ag2C4Cu1K1N4.ICSD_415570     | insulator  | insulator |
| Ag2C4Cu1N4Rb1.ICSD_415571    | insulator  | insulator |
| Ag2C4N4S4Zn1.ICSD_71563      | insulator  | insulator |
| Ag2C4O4.ICSD_109770          | insulator  | insulator |
| Ag2Ca1Ge2.ICSD_25316         | metal      | metal     |
| Ag2Ca1O12V4.ICSD_161369      | insulator  | insulator |
| Ag2Ca1.ICSD_57354            | metal      | metal     |
| Ag2Ca4Si6.ICSD_410522        | metal      | metal     |
| Ag2Cd1Ge1S4.ICSD_152753      | insulator  | insulator |

Supplementary Table 20. Five-fold cross validated predictions for the metal/insulator classification (12/598).

| system                   | calculated | predicted |
|--------------------------|------------|-----------|
| Ag2Cd1Ge1S4.ICSD.423404  | insulator  | insulator |
| Ag2Cd1Mg1.ICSD.104404    | metal      | metal     |
| Ag2Ce1Ge2.ICSD.246609    | metal      | metal     |
| Ag2Ce1Ge2.ICSD.604945    | metal      | metal     |
| Ag2Ce1In1.ICSD.57372     | metal      | metal     |
| Ag2Ce1Si2.ICSD.52551     | metal      | metal     |
| Ag2Cl1N1O3.ICSD.8013     | insulator  | insulator |
| Ag2Cl4Pd1.ICSD.65239     | insulator  | insulator |
| Ag2Cl6Cs2.ICSD.66067     | metal      | insulator |
| Ag2Cl6Re1.ICSD.156662    | insulator  | insulator |
| Ag2Cr1O4.ICSD.16298      | insulator  | insulator |
| Ag2Cr2O7.ICSD.2433       | insulator  | insulator |
| Ag2Cs2S4Ti1.ICSD.280645  | insulator  | insulator |
| Ag2Cu2O3.ICSD.51672      | metal      | metal     |
| Ag2Dy1In1.ICSD.57382     | metal      | metal     |
| Ag2Dy1.ICSD.150637       | metal      | metal     |
| Ag2Er1In1.ICSD.58254     | metal      | metal     |
| Ag2Er1.ICSD.605091       | metal      | metal     |
| Ag2Eu1Si2.ICSD.106697    | metal      | metal     |
| Ag2Eu1Si2.ICSD.605133    | metal      | metal     |
| Ag2Eu1.ICSD.58258        | metal      | metal     |
| Ag2Eu1.ICSD.605125       | metal      | metal     |
| Ag2Eu3.ICSD.58259        | metal      | metal     |
| Ag2F14Zn1Zr2.ICSD.422839 | insulator  | insulator |
| Ag2F1H2H1O1.ICSD.32660   | insulator  | insulator |
| Ag2F1.ICSD.68439         | metal      | metal     |
| Ag2F5.ICSD.95832         | insulator  | insulator |
| Ag2Fe1S4Sn1.ICSD.42534   | insulator  | insulator |
| Ag2Ga1.ICSD.151175       | metal      | metal     |
| Ag2Gd1In1.ICSD.185964    | metal      | metal     |
| Ag2Gd1Si2.ICSD.52574     | metal      | metal     |
| Ag2Gd1Si2.ICSD.605276    | metal      | metal     |
| Ag2Gd1.ICSD.104473       | metal      | metal     |
| Ag2Ge1In2S6.ICSD.159759  | insulator  | insulator |
| Ag2Ge1In2Se6.ICSD.88168  | insulator  | insulator |
| Ag2Ge1K2S4.ICSD.170843   | insulator  | insulator |
| Ag2Ge1Li1.ICSD.85307     | metal      | metal     |
| Ag2Ge1O3.ICSD.167332     | insulator  | insulator |
| Ag2Ge1O4Zn1.ICSD.81328   | metal      | insulator |
| Ag2Ge1Pb1S4.ICSD.180802  | insulator  | insulator |
| Ag2Ge1Rb2S4.ICSD.170844  | insulator  | insulator |
| Ag2Ge1S3.ICSD.41711      | insulator  | insulator |
| Ag2Ge2Nd1.ICSD.247286    | metal      | metal     |
| Ag2Ge2Pr1.ICSD.154450    | metal      | metal     |
| Ag2Ge2Sr1.ICSD.25317     | metal      | metal     |
| Ag2H12N4O4S1.ICSD.36585  | insulator  | insulator |
| Ag2H1O4P1.ICSD.30503     | insulator  | insulator |
| Ag2H3I1O6.ICSD.155415    | insulator  | insulator |
| Ag2H4O12S3.ICSD.408949   | insulator  | insulator |
| Ag2H4O6Te1.ICSD.240968   | metal      | insulator |

Supplementary Table 21. Five-fold cross validated predictions for the metal/insulator classification (13/598).

| system                     | calculated | predicted |
|----------------------------|------------|-----------|
| Ag2H6N2O6Pd1S2.ICSD.280075 | insulator  | insulator |
| Ag2Hf1S3.ICSD.79251        | insulator  | insulator |
| Ag2Hg1I2S1.ICSD.413300     | insulator  | insulator |
| Ag2Hg1I4.ICSD.30264        | insulator  | insulator |
| Ag2Hg1I4.ICSD.6069         | insulator  | insulator |
| Ag2Hg1O2.ICSD.280333       | insulator  | insulator |
| Ag2Hg1S2.ICSD.201713       | insulator  | insulator |
| Ag2Hg1Se4Sn1.ICSD.95094    | metal      | insulator |
| Ag2Hg2O12Te3.ICSD.171006   | insulator  | insulator |
| Ag2Hg7I6P8.ICSD.171257     | insulator  | insulator |
| Ag2Ho1In1.ICSD.58280       | metal      | metal     |
| Ag2Ho1.ICSD.605358         | metal      | metal     |
| Ag2I10Tl6.ICSD.35389       | insulator  | insulator |
| Ag2I1N1O3.ICSD.8075        | insulator  | insulator |
| Ag2I6O18Ti1.ICSD.420852    | insulator  | insulator |
| Ag2In1La1.ICSD.58290       | metal      | metal     |
| Ag2In1Li1.ICSD.171472      | metal      | metal     |
| Ag2In1Mg1.ICSD.605394      | metal      | metal     |
| Ag2In1Nd1.ICSD.58295       | metal      | metal     |
| Ag2In1Pr1.ICSD.58297       | metal      | metal     |
| Ag2In1Sc1.ICSD.58298       | metal      | metal     |
| Ag2In1Sm1.ICSD.58299       | metal      | metal     |
| Ag2In1Tb1.ICSD.56987       | metal      | metal     |
| Ag2In1Tm1.ICSD.58303       | metal      | metal     |
| Ag2In1Y1.ICSD.58304        | metal      | metal     |
| Ag2In2S6Si1.ICSD.189391    | insulator  | insulator |
| Ag2In2Se6Si1.ICSD.154635   | insulator  | insulator |
| Ag2K1Nb1Se4.ICSD.412479    | insulator  | insulator |
| Ag2K1P1S4.ICSD.420033      | insulator  | insulator |
| Ag2K1S3Sb1.ICSD.420015     | insulator  | insulator |
| Ag2K1S4Sb1.ICSD.82143      | insulator  | insulator |
| Ag2K1Se4Ta1.ICSD.412477    | insulator  | insulator |
| Ag2K1.ICSD.150142          | metal      | metal     |
| Ag2K2Se4Sn1.ICSD.90119     | insulator  | insulator |
| Ag2La1Si2.ICSD.52587       | metal      | metal     |
| Ag2La1.ICSD.605497         | metal      | metal     |
| Ag2Li1Sn1.ICSD.154086      | metal      | metal     |
| Ag2Li3Si3.ICSD.85305       | metal      | metal     |
| Ag2Lu1.ICSD.605531         | metal      | metal     |
| Ag2Mg1Zn1.ICSD.605562      | metal      | metal     |
| Ag2Mn1O4.ICSD.35762        | metal      | insulator |
| Ag2Mn1O8Sr1V2.ICSD.408052  | insulator  | insulator |
| Ag2Mo1O12Te4.ICSD.420406   | insulator  | insulator |
| Ag2Mo1O4.ICSD.36187        | insulator  | insulator |
| Ag2Mo2O7.ICSD.31027        | insulator  | insulator |
| Ag2Mo3O16Te3.ICSD.420405   | insulator  | insulator |
| Ag2Na1.ICSD.58337          | metal      | metal     |
| Ag2Nb4O11.ICSD.180731      | insulator  | insulator |
| Ag2Nb4O11.ICSD.180733      | insulator  | insulator |
| Ag2Nd1Si2.ICSD.106695      | metal      | metal     |

Supplementary Table 22. Five-fold cross validated predictions for the metal/insulator classification (14/598).

| system                  | calculated | predicted |
|-------------------------|------------|-----------|
| Ag2Nd1.ICSD_58339       | metal      | metal     |
| Ag2Nd1.ICSD_605603      | metal      | metal     |
| Ag2Ni1O2.ICSD_160582    | metal      | metal     |
| Ag2Ni1O2.ICSD_290597    | metal      | metal     |
| Ag2O10U1W2.ICSD_98550   | insulator  | insulator |
| Ag2O11Ta4.ICSD_180734   | insulator  | insulator |
| Ag2O11V4.ICSD_93453     | insulator  | insulator |
| Ag2O12Sr1V4.ICSD_161371 | insulator  | insulator |
| Ag2O12U2V2.ICSD_81576   | insulator  | insulator |
| Ag2O1.ICSD_20368        | metal      | metal     |
| Ag2O1.ICSD_246904       | metal      | metal     |
| Ag2O2Pd1.ICSD_51499     | insulator  | metal     |
| Ag2O3S1.ICSD_4433       | insulator  | insulator |
| Ag2O3Se1.ICSD_78388     | insulator  | insulator |
| Ag2O3Si1.ICSD_36589     | insulator  | insulator |
| Ag2O3Ti1.ICSD_84970     | insulator  | insulator |
| Ag2O3.ICSD_15999        | metal      | metal     |
| Ag2O3.ICSD_59193        | insulator  | metal     |
| Ag2O4S1.ICSD_69096      | insulator  | insulator |
| Ag2O4Se1.ICSD_413089    | insulator  | insulator |
| Ag2O4Si1Zn1.ICSD_81327  | metal      | insulator |
| Ag2O4Te1.ICSD_41464     | insulator  | insulator |
| Ag2O6P1V1.ICSD_73580    | insulator  | insulator |
| Ag2O6Te2.ICSD_415472    | insulator  | insulator |
| Ag2O6Te2.ICSD_417354    | insulator  | insulator |
| Ag2O7P2Pb1.ICSD_93967   | insulator  | insulator |
| Ag2O7P2Zn1.ICSD_90917   | insulator  | insulator |
| Ag2O7S2.ICSD_423166     | insulator  | insulator |
| Ag2O7Te2.ICSD_416281    | metal      | insulator |
| Ag2O7W2.ICSD_31028      | insulator  | insulator |
| Ag2P2S11Ti2.ICSD_84606  | insulator  | insulator |
| Ag2Pr1Si2.ICSD_106694   | metal      | metal     |
| Ag2Pr1.ICSD_58346       | metal      | metal     |
| Ag2Pr1.ICSD_605675      | metal      | metal     |
| Ag2Rb1S4Sb1.ICSD_82145  | insulator  | insulator |
| Ag2Rh15S15.ICSD_605703  | metal      | metal     |
| Ag2S1.ICSD_173999       | metal      | insulator |
| Ag2S1.ICSD_262633       | metal      | insulator |
| Ag2S1.ICSD_262634       | metal      | insulator |
| Ag2S1.ICSD_262637       | insulator  | insulator |
| Ag2S1.ICSD_98452        | insulator  | insulator |
| Ag2S1.ICSD_98453        | insulator  | insulator |
| Ag2S3Si1.ICSD_180764    | insulator  | insulator |
| Ag2S3Te1.ICSD_85135     | insulator  | insulator |
| Ag2S4Sn1Zn1.ICSD_605734 | insulator  | insulator |
| Ag2Sc1.ICSD_605791      | metal      | metal     |
| Ag2Se1.ICSD_15213       | metal      | metal     |
| Ag2Se1.ICSD_43242       | metal      | metal     |
| Ag2Si1.ICSD_605838      | metal      | metal     |
| Ag2Si2Sm1.ICSD_106696   | metal      | metal     |

Supplementary Table 23. Five-fold cross validated predictions for the metal/insulator classification (15/598).

| system                     | calculated | predicted |
|----------------------------|------------|-----------|
| Ag2Si2Sr1.ICSD_25330       | metal      | metal     |
| Ag2Si2Tb1.ICSD_98341       | metal      | metal     |
| Ag2Si2Yb1.ICSD_52607       | metal      | metal     |
| Ag2Sn2Sr1.ICSD_414         | metal      | metal     |
| Ag2Sr1.ICSD_58359          | metal      | metal     |
| Ag2Sr3.ICSD_58360          | metal      | metal     |
| Ag2Tb1.ICSD_605886         | metal      | metal     |
| Ag2Te1.ICSD_73402          | metal      | metal     |
| Ag2Th1.ICSD_15443          | metal      | metal     |
| Ag2Tm1.ICSD_58373          | metal      | metal     |
| Ag2Y1.ICSD_605957          | metal      | metal     |
| Ag2Yb1.ICSD_58380          | metal      | metal     |
| Ag2Yb1.ICSD_605966         | metal      | metal     |
| Ag2Yb3.ICSD_605972         | metal      | metal     |
| Ag2Zr1.ICSD_605995         | metal      | metal     |
| Ag3Al2La1.ICSD_57329       | metal      | metal     |
| Ag3As1O4.ICSD_35545        | insulator  | insulator |
| Ag3As1S3.ICSD_36352        | insulator  | insulator |
| Ag3As1S3.ICSD_419203       | insulator  | insulator |
| Ag3As1S4.ICSD_86227        | insulator  | insulator |
| Ag3As1Se3.ICSD_76519       | insulator  | metal     |
| Ag3As1Se3.ICSD_82636       | insulator  | insulator |
| Ag3As2K3.ICSD_32016        | insulator  | insulator |
| Ag3Au1S2.ICSD_15732        | insulator  | insulator |
| Ag3Au1Se2.ICSD_171959      | insulator  | insulator |
| Ag3Au1Te2.ICSD_15733       | insulator  | metal     |
| Ag3B1O3.ICSD_26521         | metal      | insulator |
| Ag3B1O3.ICSD_32721         | insulator  | insulator |
| Ag3Ba4Ge20.ICSD_56980      | metal      | metal     |
| Ag3Br1S1.ICSD_174097       | insulator  | insulator |
| Ag3C1N3O6S1.ICSD_23513     | insulator  | insulator |
| Ag3C6Cd1N6Rb1.ICSD_75503   | insulator  | insulator |
| Ag3C6Co1N6.ICSD_16959      | insulator  | insulator |
| Ag3C6Fe1H6N8.ICSD_64627    | metal      | insulator |
| Ag3C6Fe1N6.ICSD_173553     | metal      | insulator |
| Ag3C6H6La1N6O3.ICSD_170986 | insulator  | insulator |
| Ag3C6H6N6O3Tb1.ICSD_249343 | insulator  | insulator |
| Ag3C6K1Mn1N6.ICSD_262507   | insulator  | insulator |
| Ag3C6K2N6Na1.ICSD_59725    | insulator  | insulator |
| Ag3C6K2N6Na1.ICSD_65699    | insulator  | insulator |
| Ag3Ca5.ICSD_57355          | metal      | metal     |
| Ag3Ce1K2Te4.ICSD_86678     | insulator  | insulator |
| Ag3Co2O6Sb1.ICSD_174288    | insulator  | insulator |
| Ag3Cs1S2.ICSD_1033         | insulator  | insulator |
| Ag3Cs1Se5Tb2.ICSD_93684    | insulator  | insulator |
| Ag3Cu1S2.ICSD_163982       | insulator  | insulator |
| Ag3Cu1S2.ICSD_163983       | insulator  | insulator |
| Ag3Er3Ga8.ICSD_605107      | metal      | metal     |
| Ag3F14Hf2.ICSD_65178       | insulator  | insulator |
| Ag3Fe1O8V2.ICSD_166890     | insulator  | insulator |

Supplementary Table 24. Five-fold cross validated predictions for the metal/insulator classification (16/598).

| system                  | calculated | predicted |
|-------------------------|------------|-----------|
| Ag3Ga8Ho3.ICSD.605157   | metal      | metal     |
| Ag3Ge3P6Sn2.ICSD.52575  | insulator  | insulator |
| Ag3I1S1.ICSD.201004     | insulator  | insulator |
| Ag3In1O8P2.ICSD.245001  | insulator  | insulator |
| Ag3In1.ICSD.58283       | metal      | metal     |
| Ag3In2O12P3.ICSD.245002 | insulator  | insulator |
| Ag3K1Se2.ICSD.402643    | insulator  | insulator |
| Ag3K1Te2.ICSD.402230    | insulator  | insulator |
| Ag3Li17Sn6.ICSD.170571  | metal      | metal     |
| Ag3Li1O2.ICSD.4204      | insulator  | insulator |
| Ag3Mg1.ICSD.58323       | metal      | metal     |
| Ag3N1O3S1.ICSD.25523    | insulator  | insulator |
| Ag3N1O3Se1.ICSD.33581   | insulator  | insulator |
| Ag3Na1O2.ICSD.9627      | insulator  | insulator |
| Ag3Na1S2.ICSD.73198     | insulator  | insulator |
| Ag3Ni2O4.ICSD.172878    | metal      | metal     |
| Ag3O4P1.ICSD.31078      | metal      | insulator |
| Ag3O4P1.ICSD.76968      | insulator  | insulator |
| Ag3O4Ru1.ICSD.59924     | insulator  | insulator |
| Ag3O4Sb1.ICSD.417675    | insulator  | insulator |
| Ag3O4V1.ICSD.249417     | insulator  | insulator |
| Ag3O4V1.ICSD.417470     | insulator  | insulator |
| Ag3O4.ICSD.202218       | metal      | insulator |
| Ag3P11.ICSD.26563       | insulator  | insulator |
| Ag3P1S4.ICSD.416585     | insulator  | insulator |
| Ag3P1Se4.ICSD.97760     | insulator  | insulator |
| Ag3P2S8Y1.ICSD.417658   | insulator  | insulator |
| Ag3P6Si3Sn2.ICSD.52595  | insulator  | insulator |
| Ag3P7Sn1.ICSD.411041    | insulator  | insulator |
| Ag3Pt1.ICSD.605689      | metal      | metal     |
| Ag3Rb1S2.ICSD.1034      | insulator  | insulator |
| Ag3Rb1Se2.ICSD.90795    | insulator  | insulator |
| Ag3Rb1Se5Sm2.ICSD.91095 | insulator  | insulator |
| Ag3Rb1Te2.ICSD.90872    | insulator  | insulator |
| Ag3S2Ti1.ICSD.75976     | insulator  | insulator |
| Ag3S3Sb1.ICSD.181518    | insulator  | insulator |
| Ag3S3Sb1.ICSD.33714     | insulator  | insulator |
| Ag3S6Sb2Ti3.ICSD.160100 | insulator  | insulator |
| Ag3Sb1.ICSD.52600       | metal      | metal     |
| Ag3Sb1.ICSD.64716       | metal      | metal     |
| Ag3Sn1.ICSD.2721        | metal      | metal     |
| Ag3Te2Ti1.ICSD.71081    | metal      | metal     |
| Ag3Tm1.ICSD.58374       | metal      | metal     |
| Ag3Yb5.ICSD.58382       | metal      | metal     |
| Ag4C4N4S4.ICSD.159147   | insulator  | insulator |
| Ag4Cd1Ge2S7.ICSD.95121  | insulator  | insulator |
| Ag4Cu1O6Te1.ICSD.416931 | metal      | insulator |
| Ag4Dy3Sn4.ICSD.157373   | metal      | metal     |
| Ag4Eu1Sb2.ICSD.424312   | metal      | metal     |
| Ag4Ho3Sn4.ICSD.157374   | metal      | metal     |

Supplementary Table 25. Five-fold cross validated predictions for the metal/insulator classification (17/598).

| system                    | calculated | predicted |
|---------------------------|------------|-----------|
| Ag4I1O4P1.ICSD.245791     | insulator  | insulator |
| Ag4I2O4Se1.ICSD.418902    | insulator  | insulator |
| Ag4K2S3.ICSD.863          | insulator  | insulator |
| Ag4K2Se3.ICSD.54102       | insulator  | insulator |
| Ag4Lu1.ICSD.58321         | metal      | metal     |
| Ag4Mn1S6Sb2.ICSD.156764   | insulator  | insulator |
| Ag4Mn1S6Sb2.ICSD.38360    | insulator  | insulator |
| Ag4Mn3O8.ICSD.414178      | insulator  | insulator |
| Ag4N2O2S1.ICSD.23111      | insulator  | insulator |
| Ag4N2O6Te1.ICSD.16006     | metal      | insulator |
| Ag4O4S1Te1.ICSD.421880    | insulator  | insulator |
| Ag4O4Si1.ICSD.418314      | insulator  | insulator |
| Ag4P2S6.ICSD.24782        | insulator  | insulator |
| Ag4P2Se6.ICSD.1727        | insulator  | insulator |
| Ag4Pr3Sn4.ICSD.164498     | metal      | metal     |
| Ag4Rb2S3.ICSD.409727      | insulator  | insulator |
| Ag4S8Sn3.ICSD.164435      | insulator  | insulator |
| Ag4Sb2Sr1.ICSD.424311     | metal      | metal     |
| Ag4Sc1.ICSD.58349         | metal      | metal     |
| Ag5Ba1.ICSD.57344         | metal      | metal     |
| Ag5Ba2La1S6.ICSD.67894    | insulator  | insulator |
| Ag5Ba2S6Y1.ICSD.659302    | insulator  | insulator |
| Ag5Cd8.ICSD.604897        | metal      | metal     |
| Ag5Cl2P1S4.ICSD.416587    | insulator  | insulator |
| Ag5Cl5Hg4P8.ICSD.416360   | insulator  | insulator |
| Ag5Cs1Se3.ICSD.90871      | insulator  | insulator |
| Ag5Eu1.ICSD.58260         | metal      | metal     |
| Ag5Eu1.ICSD.605121        | metal      | metal     |
| Ag5Eu1.ICSD.605128        | metal      | metal     |
| Ag5Hg1O6Sb1.ICSD.421241   | metal      | insulator |
| Ag5I1O6.ICSD.415893       | metal      | insulator |
| Ag5O4P1Se1.ICSD.420342    | insulator  | insulator |
| Ag5O4P1Te1.ICSD.420343    | insulator  | insulator |
| Ag5O4Si1.ICSD.165377      | insulator  | insulator |
| Ag5O6Pb2.ICSD.155044      | metal      | metal     |
| Ag5O6Pb2.ICSD.24038       | metal      | metal     |
| Ag5Rb1Se3.ICSD.50738      | metal      | metal     |
| Ag5S4Sb1.ICSD.36347       | insulator  | insulator |
| Ag5Sr1.ICSD.58361         | metal      | metal     |
| Ag5Zn8.ICSD.58389         | metal      | metal     |
| Ag6Ba1O4.ICSD.9288        | insulator  | insulator |
| Ag6Ce1N9O27.ICSD.59256    | metal      | insulator |
| Ag6Cl1F3Mo2O7.ICSD.413082 | insulator  | insulator |
| Ag6Cr1O8Si1.ICSD.420804   | metal      | insulator |
| Ag6Ge10P12.ICSD.70055     | insulator  | insulator |
| Ag6Ge1O8S1.ICSD.300179    | metal      | metal     |
| Ag6Ge2O7.ICSD.404356      | insulator  | insulator |
| Ag6K2S4.ICSD.73581        | insulator  | insulator |
| Ag6O2.ICSD.26557          | metal      | metal     |
| Ag6O4Sr1.ICSD.10359       | insulator  | insulator |

Supplementary Table 26. Five-fold cross validated predictions for the metal/insulator classification (18/598).

| system                     | calculated | predicted |
|----------------------------|------------|-----------|
| Ag6O7Si2.ICSD.404355       | insulator  | insulator |
| Ag6O8S1Si1.ICSD.6225       | metal      | metal     |
| Ag7As1S6.ICSD.604743       | insulator  | insulator |
| Ag7As1Se6.ICSD.604758      | metal      | insulator |
| Ag7Ca2.ICSD.55510          | metal      | metal     |
| Ag7F31Zr6.ICSD.92446       | insulator  | insulator |
| Ag7P1S6.ICSD.601451        | insulator  | insulator |
| Ag7P1Se6.ICSD.54055        | insulator  | insulator |
| Ag7P3S11.ICSD.414335       | insulator  | insulator |
| Ag7Yb2.ICSD.370003         | metal      | metal     |
| Ag8Al4Li4.ICSD.414342      | metal      | metal     |
| Ag8Ca19N7.ICSD.410770      | metal      | metal     |
| Ag8Ca3.ICSD.107145         | metal      | metal     |
| Ag8Ce6Sn8.ICSD.55826       | metal      | metal     |
| Ag8Ge1S6.ICSD.100079       | insulator  | insulator |
| Ag8Ge1Se6.ICSD.10432       | metal      | metal     |
| Ag8O4S2Si1.ICSD.2330       | metal      | insulator |
| Ag8Pr6Sn8.ICSD.55827       | metal      | metal     |
| Ag8S1.ICSD.79770           | metal      | metal     |
| Ag8S6Si1.ICSD.1054         | insulator  | insulator |
| Ag8S6Sn1.ICSD.42533        | insulator  | insulator |
| Ag8S6Ti1.ICSD.95648        | insulator  | insulator |
| Ag8Se6Sn1.ICSD.95093       | metal      | metal     |
| Ag9Ga1Se6.ICSD.2411        | metal      | metal     |
| Ag9Ge2I1O8.ICSD.380303     | insulator  | insulator |
| Ag9In4.ICSD.832            | metal      | metal     |
| Al0.4C0.2Mo0.6.ICSD.606230 | metal      | metal     |
| Al0.4C0.2Nb0.6.ICSD.606235 | metal      | metal     |
| Al0.4C0.2Ta0.6.ICSD.606257 | metal      | metal     |
| Al102Re24Si12.ICSD.95127   | metal      | metal     |
| Al10Ba7.ICSD.420092        | metal      | metal     |
| Al10Ce1Ru2.ICSD.59912      | metal      | metal     |
| Al10Fe2Th1.ICSD.152354     | metal      | metal     |
| Al10Fe2U1.ICSD.155072      | metal      | metal     |
| Al10Fe2Y1.ICSD.107224      | metal      | metal     |
| Al10Fe2Yb1.ICSD.151140     | metal      | metal     |
| Al10H2O16.ICSD.23651       | insulator  | insulator |
| Al10Mn3.ICSD.57974         | metal      | metal     |
| Al10Pr1Ru2.ICSD.186913     | metal      | metal     |
| Al10Ru2U1.ICSD.182114      | metal      | metal     |
| Al10Ru2Yb1.ICSD.186915     | metal      | metal     |
| Al10V1.ICSD.58202          | metal      | metal     |
| Al11La3.ICSD.608281        | metal      | metal     |
| Al11Mn4.ICSD.10509         | metal      | metal     |
| Al12Ca1O19.ICSD.34394      | insulator  | insulator |
| Al12Ca1O27Si4.ICSD.91233   | insulator  | insulator |
| Al12Ca8O24S2.ICSD.67589    | insulator  | insulator |
| Al12Ca8O24Te2.ICSD.86156   | insulator  | insulator |
| Al12Cd8O24S2.ICSD.78368    | insulator  | insulator |
| Al12Cd8O24Te2.ICSD.86155   | insulator  | insulator |

Supplementary Table 27. Five-fold cross validated predictions for the metal/insulator classification (19/598).

| system                       | calculated | predicted |
|------------------------------|------------|-----------|
| Al12Ce3Ru4.ICSD.99134        | metal      | metal     |
| Al12Dy5Fe4Mg5Si6.ICSD.262937 | metal      | metal     |
| Al12I21La24.ICSD.416019      | metal      | metal     |
| Al12Mg17.ICSD.158247         | metal      | metal     |
| Al12Mn1.ICSD.608472          | metal      | metal     |
| Al12Mo1.ICSD.608577          | metal      | metal     |
| Al12Nd4O32Pb8.ICSD.406531    | insulator  | insulator |
| Al12O19Sr1.ICSD.2006         | insulator  | insulator |
| Al12O24S2Sr8.ICSD.67590      | insulator  | insulator |
| Al12O24Sr8Te2.ICSD.82609     | insulator  | insulator |
| Al12Re1.ICSD.109107          | metal      | metal     |
| Al12Ru1.ICSD.609231          | metal      | metal     |
| Al12Ta17.ICSD.609426         | metal      | metal     |
| Al12Tc1.ICSD.58178           | metal      | metal     |
| Al12W1.ICSD.58207            | metal      | metal     |
| Al13Ba7.ICSD.170239          | metal      | metal     |
| Al13Cr4Si4.ICSD.76116        | metal      | metal     |
| Al13La16.ICSD.414423         | metal      | metal     |
| Al13Os4.ICSD.58110           | metal      | metal     |
| Al13Ru4.ICSD.58158           | metal      | metal     |
| Al14Ca12O32.ICSD.164634      | metal      | insulator |
| Al14Ca13.ICSD.165239         | metal      | metal     |
| Al14Mg13.ICSD.150647         | metal      | metal     |
| Al14O25Sr4.ICSD.88527        | insulator  | insulator |
| Al16Ce2Pt9.ICSD.163921       | metal      | metal     |
| Al16Co7Hf6.ICSD.606582       | metal      | metal     |
| Al16Co7Ti6.ICSD.606678       | metal      | metal     |
| Al16Co7Zr6.ICSD.606726       | metal      | metal     |
| Al16Hf6Os7.ICSD.608133       | metal      | metal     |
| Al16Hf6Pd7.ICSD.608137       | metal      | metal     |
| Al16Hf6Pt7.ICSD.608140       | metal      | metal     |
| Al16Hf6Rh7.ICSD.608144       | metal      | metal     |
| Al16Ir7Sc6.ICSD.608246       | metal      | metal     |
| Al16Ir7Ti6.ICSD.608248       | metal      | metal     |
| Al16Ir7Zr6.ICSD.608254       | metal      | metal     |
| Al16Ni7Sc6.ICSD.608840       | metal      | metal     |
| Al16Ni7Ti6.ICSD.608909       | metal      | metal     |
| Al16Ni7Zr6.ICSD.608966       | metal      | metal     |
| Al16Os7Sc6.ICSD.609011       | metal      | metal     |
| Al16Os7Ti6.ICSD.609012       | metal      | metal     |
| Al16Os7Zr6.ICSD.609018       | metal      | metal     |
| Al16Pd7Sc6.ICSD.609052       | metal      | metal     |
| Al16Pd7Ti6.ICSD.609061       | metal      | metal     |
| Al16Pd7Zr6.ICSD.609066       | metal      | metal     |
| Al16Pt7Ti6.ICSD.609161       | metal      | metal     |
| Al16Pt7Zr6.ICSD.609168       | metal      | metal     |
| Al16Rh7Sc6.ICSD.609216       | metal      | metal     |
| Al16Rh7Ti6.ICSD.609218       | metal      | metal     |
| Al16Rh7Zr6.ICSD.609222       | metal      | metal     |
| Al16Ru7Sc6.ICSD.609239       | metal      | metal     |

Supplementary Table 28. Five-fold cross validated predictions for the metal/insulator classification (20/598).

| system                      | calculated | predicted |
|-----------------------------|------------|-----------|
| Al16Ru7Ti6.ICSD_609242      | metal      | metal     |
| Al16Ru7Zr6.ICSD_609247      | metal      | metal     |
| Al17Dy2.ICSD_607243         | metal      | metal     |
| Al17Er2.ICSD_657488         | metal      | metal     |
| Al17Mo4.ICSD_400887         | metal      | metal     |
| Al17Pd8Si4.ICSD_52650       | metal      | metal     |
| Al17Tb2.ICSD_609466         | metal      | metal     |
| Al18Cr2Mg3.ICSD_57659       | metal      | metal     |
| Al18Mg3Mn2.ICSD_608417      | metal      | metal     |
| Al18Mg3Mo2.ICSD_608418      | metal      | metal     |
| Al18Mg3Ta2.ICSD_608444      | metal      | metal     |
| Al18Mg3Ti2.ICSD_608446      | metal      | metal     |
| Al18Mg3V2.ICSD_608447       | metal      | metal     |
| Al18Mg3W2.ICSD_608448       | metal      | metal     |
| Al18Ni5U4.ICSD_58070        | metal      | metal     |
| Al1As1Cu1O5.ICSD_91551      | insulator  | insulator |
| Al1As1F1Na1O4.ICSD_30205    | insulator  | insulator |
| Al1As1H4O6.ICSD_170740      | insulator  | insulator |
| Al1As1O4.ICSD_24512         | insulator  | insulator |
| Al1As1O4.ICSD_67228         | insulator  | insulator |
| Al1As1.ICSD_56967           | metal      | metal     |
| Al1As1.ICSD_606008          | insulator  | insulator |
| Al1As1.ICSD_67771           | insulator  | insulator |
| Al1As2K1O7.ICSD_79711       | insulator  | insulator |
| Al1As2K2Na1.ICSD_73280      | insulator  | insulator |
| Al1As2Li1O7.ICSD_161498     | insulator  | insulator |
| Al1As2Li3Mo2O14.ICSD_260199 | insulator  | insulator |
| Al1As2Na1O7.ICSD_75142      | insulator  | insulator |
| Al1As2Na3.ICSD_63149        | insulator  | insulator |
| Al1As3Ca3.ICSD_32727        | insulator  | insulator |
| Al1As3Cl4S5.ICSD_415503     | insulator  | insulator |
| Al1As4Ca3Na3.ICSD_402309    | insulator  | insulator |
| Al1Au1Ca1.ICSD_370015       | metal      | metal     |
| Al1Au1Ce1.ICSD_658143       | metal      | metal     |
| Al1Au1Dy1.ICSD_602605       | metal      | metal     |
| Al1Au1Er1.ICSD_602607       | metal      | metal     |
| Al1Au1Eu1.ICSD_602609       | metal      | metal     |
| Al1Au1Gd1.ICSD_602627       | metal      | metal     |
| Al1Au1Ho1.ICSD_602606       | metal      | metal     |
| Al1Au1La1.ICSD_602633       | metal      | metal     |
| Al1Au1Nd1.ICSD_602636       | metal      | metal     |
| Al1Au1O2.ICSD_95663         | insulator  | insulator |
| Al1Au1Pr1.ICSD_602635       | metal      | metal     |
| Al1Au1Tb1.ICSD_602604       | metal      | metal     |
| Al1Au1Ti1.ICSD_57506        | metal      | metal     |
| Al1Au1Y1.ICSD_602610        | metal      | metal     |
| Al1Au1Yb1.ICSD_658146       | metal      | metal     |
| Al1Au1.ICSD_104649          | metal      | metal     |
| Al1Au1.ICSD_57495           | metal      | metal     |
| Al1Au2Hf1.ICSD_57503        | metal      | metal     |

Supplementary Table 29. Five-fold cross validated predictions for the metal/insulator classification (21/598).

| system                      | calculated | predicted |
|-----------------------------|------------|-----------|
| Al1Au2Mn1.ICSD_57504        | metal      | metal     |
| Al1Au2Sc1.ICSD_57505        | metal      | metal     |
| Al1Au2Ti1.ICSD_57507        | metal      | metal     |
| Al1Au2U1.ICSD_657425        | metal      | metal     |
| Al1Au2.ICSD_57496           | metal      | metal     |
| Al1Au2.ICSD_57497           | metal      | metal     |
| Al1Au2.ICSD_606020          | metal      | metal     |
| Al1Au4.ICSD_606018          | metal      | metal     |
| Al1B14Er1.ICSD_602386       | metal      | metal     |
| Al1B14Ho1.ICSD_655666       | metal      | metal     |
| Al1B14Ni20.ICSD_408418      | metal      | metal     |
| Al1B1Ba1F2O3.ICSD_409663    | insulator  | insulator |
| Al1B1Ba1F2O3.ICSD_91316     | insulator  | insulator |
| Al1B1Be1.ICSD_43351         | metal      | metal     |
| Al1B1Ca1O4.ICSD_27647       | insulator  | insulator |
| Al1B1H3Na1O10P2.ICSD_409427 | insulator  | insulator |
| Al1B1Li2O4.ICSD_50612       | insulator  | insulator |
| Al1B1Mg1O4.ICSD_34349       | insulator  | insulator |
| Al1B1Mo1.ICSD_16777         | metal      | metal     |
| Al1B1O3.ICSD_30538          | insulator  | insulator |
| Al1B1O4Pb1.ICSD_98572       | insulator  | insulator |
| Al1B2Cr2.ICSD_20083         | metal      | metal     |
| Al1B2Fe2.ICSD_20322         | metal      | metal     |
| Al1B2Li1O5.ICSD_51314       | insulator  | insulator |
| Al1B2Li3O6.ICSD_51754       | insulator  | insulator |
| Al1B2Mn2.ICSD_25518         | metal      | metal     |
| Al1B2.ICSD_52282            | metal      | metal     |
| Al1B3Ca1O7.ICSD_161813      | insulator  | insulator |
| Al1B4Cr3.ICSD_20082         | metal      | metal     |
| Al1B4Lu1.ICSD_656223        | metal      | metal     |
| Al1B4Yb1.ICSD_167533        | metal      | metal     |
| Al1B4Yb1.ICSD_181368        | metal      | metal     |
| Al1B4Yb1.ICSD_260796        | metal      | metal     |
| Al1B6Yb2.ICSD_41404         | metal      | metal     |
| Al1Ba1F5.ICSD_37033         | insulator  | insulator |
| Al1Ba1F5.ICSD_80565         | insulator  | insulator |
| Al1Ba1Ge1.ICSD_417662       | metal      | metal     |
| Al1Ba1H1Si1.ICSD_162869     | insulator  | insulator |
| Al1Ba1La1O4.ICSD_62490      | insulator  | insulator |
| Al1Ba1Si1.ICSD_162866       | metal      | metal     |
| Al1Ba2Cu2F11.ICSD_50483     | insulator  | insulator |
| Al1Ba2In1O5.ICSD_33805      | insulator  | insulator |
| Al1Ba3F9.ICSD_72718         | insulator  | insulator |
| Al1Ba3H1O4.ICSD_280520      | insulator  | insulator |
| Al1Be1H5.ICSD_156311        | insulator  | insulator |
| Al1Be1H5.ICSD_156312        | insulator  | insulator |
| Al1Be1La3S7.ICSD_606164     | insulator  | insulator |
| Al1Be1Na3O8Si2.ICSD_4334    | insulator  | insulator |
| Al1Bi1O3.ICSD_158756        | insulator  | insulator |
| Al1Bi1O3.ICSD_185508        | insulator  | insulator |

Supplementary Table 30. Five-fold cross validated predictions for the metal/insulator classification (22/598).

| system                      | calculated | predicted |
|-----------------------------|------------|-----------|
| Al1Bi1_ICSD.184567          | metal      | metal     |
| Al1Bi2Br1Cl4Te2_ICSD.174525 | insulator  | insulator |
| Al1Br1Cl4Sb2Te2_ICSD.174524 | insulator  | insulator |
| Al1Br4Cs1_ICSD.83435        | insulator  | insulator |
| Al1Br4Cu1_ICSD.165608       | insulator  | insulator |
| Al1Br4Ti1_ICSD.419829       | insulator  | insulator |
| Al1Br7Se1_ICSD.401396       | insulator  | insulator |
| Al1C1.67Zr1_ICSD.606293     | metal      | metal     |
| Al1C1Ce3_ICSD.43846         | metal      | metal     |
| Al1C1Co3_ICSD.43847         | metal      | metal     |
| Al1C1Cr2_ICSD.42918         | metal      | metal     |
| Al1C1Dy3_ICSD.43848         | metal      | metal     |
| Al1C1Er3_ICSD.43849         | metal      | metal     |
| Al1C1Er3_ICSD.606192        | metal      | metal     |
| Al1C1F5O3Sr2_ICSD.201803    | insulator  | insulator |
| Al1C1Fe3_ICSD.43853         | metal      | metal     |
| Al1C1Gd3_ICSD.43854         | metal      | metal     |
| Al1C1H2K1O5_ICSD.153303     | insulator  | insulator |
| Al1C1H2Na1O5_ICSD.100140    | insulator  | insulator |
| Al1C1Ho3_ICSD.43856         | metal      | metal     |
| Al1C1La3_ICSD.56395         | metal      | metal     |
| Al1C1Mn3_ICSD.43860         | metal      | metal     |
| Al1C1Mn3_ICSD.606226        | metal      | metal     |
| Al1C1Nb2_ICSD.606236        | metal      | metal     |
| Al1C1Nd3_ICSD.57528         | metal      | metal     |
| Al1C1O1Sc1_ICSD.419683      | insulator  | insulator |
| Al1C1Pr3_ICSD.185962        | metal      | metal     |
| Al1C1Pt3_ICSD.43864         | metal      | metal     |
| Al1C1Sc2_ICSD.160378        | metal      | metal     |
| Al1C1Sc3_ICSD.50161         | metal      | metal     |
| Al1C1Ta2_ICSD.181247        | metal      | metal     |
| Al1C1Ta2_ICSD.187514        | metal      | metal     |
| Al1C1Tb3_ICSD.43866         | metal      | metal     |
| Al1C1Tb3_ICSD.606265        | metal      | metal     |
| Al1C1Ti2_ICSD.606272        | metal      | metal     |
| Al1C1Ti3_ICSD.163846        | metal      | metal     |
| Al1C1Tm3_ICSD.43868         | metal      | metal     |
| Al1C1V2_ICSD.606283         | metal      | metal     |
| Al1C1W2_ICSD.165101         | metal      | metal     |
| Al1C1Y3_ICSD.43869          | metal      | metal     |
| Al1C1Zr2_ICSD.157761        | metal      | metal     |
| Al1C2Ta3_ICSD.249399        | metal      | metal     |
| Al1C2Ti3_ICSD.182475        | metal      | metal     |
| Al1C3Nb4_ICSD.160755        | metal      | metal     |
| Al1C3Ta4_ICSD.159456        | metal      | metal     |
| Al1C3V4_ICSD.163549         | metal      | metal     |
| Al1C8H24P1Sn2_ICSD.163054   | insulator  | insulator |
| Al1Ca1F14Mg3Na3_ICSD.168054 | insulator  | insulator |
| Al1Ca1F5_ICSD.171399        | insulator  | insulator |
| Al1Ca1F5_ICSD.69563         | insulator  | insulator |

Supplementary Table 31. Five-fold cross validated predictions for the metal/insulator classification (23/598).

| system                        | calculated | predicted |
|-------------------------------|------------|-----------|
| Al1Ca1F6Li1_ICSD.150332       | insulator  | insulator |
| Al1Ca1F6Na1_ICSD.80542        | insulator  | insulator |
| Al1Ca1H1O5Si1_ICSD.12127      | insulator  | insulator |
| Al1Ca1H1Si1_ICSD.162867       | insulator  | insulator |
| Al1Ca1H5_ICSD.156313          | insulator  | insulator |
| Al1Ca1H5_ICSD.156314          | insulator  | insulator |
| Al1Ca1H5_ICSD.172034          | insulator  | insulator |
| Al1Ca1O5Ta1_ICSD.50718        | insulator  | insulator |
| Al1Ca1O5Ta1_ICSD.99001        | insulator  | insulator |
| Al1Ca1Pd1_ICSD.370036         | metal      | metal     |
| Al1Ca1Pt1_ICSD.603309         | metal      | metal     |
| Al1Ca1Si1_ICSD.155192         | metal      | metal     |
| Al1Ca1Si1_ICSD.155193         | metal      | metal     |
| Al1Ca1Si1_ICSD.155853         | metal      | metal     |
| Al1Ca2C11F2H8O12S2_ICSD.80437 | insulator  | insulator |
| Al1Ca2F7H2O1_ICSD.182268      | insulator  | insulator |
| Al1Ca2F7_ICSD.100308          | insulator  | insulator |
| Al1Ca2F9Pb1_ICSD.180336       | insulator  | insulator |
| Al1Ca2Na5O16P4_ICSD.400310    | insulator  | insulator |
| Al1Ca3N3_ICSD.410579          | insulator  | insulator |
| Al1Ca3Sb3_ICSD.36363          | insulator  | insulator |
| Al1Cd1Ce3S7_ICSD.606335       | insulator  | insulator |
| Al1Cd1F6Na1_ICSD.80559        | insulator  | insulator |
| Al1Cd1La3S7_ICSD.606339       | insulator  | insulator |
| Al1Ce1Co1_ICSD.20632          | metal      | metal     |
| Al1Ce1Cu1_ICSD.606422         | metal      | metal     |
| Al1Ce1H2Ir1_ICSD.261890       | metal      | metal     |
| Al1Ce1H6_ICSD.247039          | metal      | insulator |
| Al1Ce1H6_ICSD.247040          | insulator  | metal     |
| Al1Ce1Ir1_ICSD.261889         | metal      | metal     |
| Al1Ce1Ni1_ICSD.57583          | metal      | metal     |
| Al1Ce1O3_ICSD.245264          | insulator  | insulator |
| Al1Ce1O3_ICSD.245267          | insulator  | insulator |
| Al1Ce1O3_ICSD.245562          | insulator  | insulator |
| Al1Ce1O3_ICSD.245565          | metal      | insulator |
| Al1Ce1Pd1_ICSD.156904         | metal      | metal     |
| Al1Ce1Pd1_ICSD.603264         | metal      | metal     |
| Al1Ce1Pd2_ICSD.604242         | metal      | metal     |
| Al1Ce1Pt1_ICSD.150172         | metal      | metal     |
| Al1Ce1Rh1_ICSD.160052         | metal      | metal     |
| Al1Ce1Ru1_ICSD.160051         | metal      | metal     |
| Al1Ce1Si2_ICSD.82674          | metal      | metal     |
| Al1Ce1_ICSD.181163            | metal      | metal     |
| Al1Ce1_ICSD.57551             | metal      | metal     |
| Al1Ce2Ru1_ICSD.422577         | metal      | metal     |
| Al1Ce3Cr1S7_ICSD.606421       | insulator  | insulator |
| Al1Ce3Fe1S7_ICSD.606457       | metal      | insulator |
| Al1Ce3Mg1S7_ICSD.606475       | insulator  | insulator |
| Al1Ce3N1_ICSD.57581           | metal      | metal     |
| Al1Ce3Ni1S7_ICSD.606499       | metal      | insulator |

Supplementary Table 32. Five-fold cross validated predictions for the metal/insulator classification (24/598).

| system                  | calculated | predicted |
|-------------------------|------------|-----------|
| Al1Ce3S7Ti1.ICSD.606505 | metal      | insulator |
| Al1Ce3S7V1.ICSD.606506  | insulator  | insulator |
| Al1Ce3S7Zn1.ICSD.606507 | insulator  | insulator |
| Al1Ce3.ICSD.108787      | metal      | metal     |
| Al1Ce3.ICSD.108788      | metal      | metal     |
| Al1Ce3.ICSD.57554       | metal      | metal     |
| Al1Ce3.ICSD.606349      | metal      | metal     |
| Al1Ce3.ICSD.606369      | metal      | metal     |
| Al1Cl1H6O4.ICSD.425880  | insulator  | insulator |
| Al1Cl1O1.ICSD.27812     | insulator  | insulator |
| Al1Cl3H12O6.ICSD.22071  | insulator  | insulator |
| Al1Cl3.ICSD.155670      | metal      | insulator |
| Al1Cl3.ICSD.39566       | insulator  | insulator |
| Al1Cl4Cs1.ICSD.8118     | insulator  | insulator |
| Al1Cl4Cu1.ICSD.165607   | insulator  | insulator |
| Al1Cl4Cu1.ICSD.35050    | insulator  | insulator |
| Al1Cl4Ga1.ICSD.62232    | insulator  | insulator |
| Al1Cl4In1.ICSD.170790   | insulator  | insulator |
| Al1Cl4Li1.ICSD.35277    | insulator  | insulator |
| Al1Cl4N1S2.ICSD.27210   | insulator  | insulator |
| Al1Cl4Na1.ICSD.71158    | insulator  | insulator |
| Al1Cl4Ti1.ICSD.419828   | insulator  | insulator |
| Al1Cl6I1.ICSD.26510     | insulator  | insulator |
| Al1Cl6I3.ICSD.26403     | insulator  | insulator |
| Al1Cl6N1S2.ICSD.14181   | insulator  | insulator |
| Al1Cl7S1.ICSD.35685     | insulator  | insulator |
| Al1Cl7Se1.ICSD.9064     | insulator  | insulator |
| Al1Cl7Te1.ICSD.26043    | insulator  | insulator |
| Al1Cl7Te1.ICSD.59133    | insulator  | insulator |
| Al1Cl8Nb1.ICSD.62029    | insulator  | insulator |
| Al1Co1Dy3S7.ICSD.606550 | insulator  | insulator |
| Al1Co1La3S7.ICSD.606601 | insulator  | insulator |
| Al1Co1Mn2.ICSD.160703   | metal      | metal     |
| Al1Co1Pr3S7.ICSD.606645 | insulator  | insulator |
| Al1Co1Pu1.ICSD.606646   | metal      | metal     |
| Al1Co1S7Y3.ICSD.606649  | insulator  | insulator |
| Al1Co1Th1.ICSD.606677   | metal      | metal     |
| Al1Co1Ti2.ICSD.185879   | metal      | metal     |
| Al1Co1U1.ICSD.606697    | metal      | metal     |
| Al1Co1.ICSD.57596       | metal      | metal     |
| Al1Co1.ICSD.606535      | metal      | metal     |
| Al1Co2Cr1.ICSD.57600    | metal      | metal     |
| Al1Co2Dy2.ICSD.107402   | metal      | metal     |
| Al1Co2Fe1.ICSD.57607    | metal      | metal     |
| Al1Co2Gd2.ICSD.412543   | metal      | metal     |
| Al1Co2Hf1.ICSD.110809   | metal      | metal     |
| Al1Co2Mn1.ICSD.606611   | metal      | metal     |
| Al1Co2Nb1.ICSD.57620    | metal      | metal     |
| Al1Co2Nd2.ICSD.107401   | metal      | metal     |
| Al1Co2Pr2.ICSD.412545   | metal      | metal     |

Supplementary Table 33. Five-fold cross validated predictions for the metal/insulator classification (25/598).

| system                  | calculated | predicted |
|-------------------------|------------|-----------|
| Al1Co2Si2.ICSD.43353    | metal      | metal     |
| Al1Co2Ta1.ICSD.606667   | metal      | metal     |
| Al1Co2Tb2.ICSD.107403   | metal      | metal     |
| Al1Co2Ti1.ICSD.606682   | metal      | metal     |
| Al1Co2U2.ICSD.57641     | metal      | metal     |
| Al1Co2V1.ICSD.606705    | metal      | metal     |
| Al1Co2Zr1.ICSD.606738   | metal      | metal     |
| Al1Co3.ICSD.187962      | metal      | metal     |
| Al1Co3.ICSD.187992      | metal      | metal     |
| Al1Cr1Cu2.ICSD.57653    | metal      | metal     |
| Al1Cr1Fe2.ICSD.57654    | metal      | metal     |
| Al1Cr1La3S7.ICSD.606794 | insulator  | insulator |
| Al1Cr1Ni2.ICSD.57662    | metal      | metal     |
| Al1Cr1Ti2.ICSD.185876   | metal      | metal     |
| Al1Cr2.ICSD.606746      | metal      | metal     |
| Al1Cs1Cu1F6.ICSD.240292 | insulator  | insulator |
| Al1Cs1F4.ICSD.10012     | insulator  | insulator |
| Al1Cs1H8N4.ICSD.2537    | insulator  | insulator |
| Al1Cs1H8N4.ICSD.40169   | metal      | insulator |
| Al1Cs1O2.ICSD.28372     | insulator  | insulator |
| Al1Cs1O4Si1.ICSD.160822 | insulator  | insulator |
| Al1Cs1O4Si1.ICSD.186607 | insulator  | insulator |
| Al1Cs1O4Si1.ICSD.186610 | insulator  | insulator |
| Al1Cs1Te3.ICSD.300180   | insulator  | insulator |
| Al1Cs2F6Na1.ICSD.41801  | insulator  | insulator |
| Al1Cs3Ge2O7.ICSD.412140 | insulator  | insulator |
| Al1Cs6K3Sb4.ICSD.300152 | insulator  | insulator |
| Al1Cs6Sb3.ICSD.300128   | insulator  | insulator |
| Al1Cu1Dy1.ICSD.606896   | metal      | metal     |
| Al1Cu1Er1.ICSD.184971   | metal      | metal     |
| Al1Cu1F6K1.ICSD.59003   | insulator  | insulator |
| Al1Cu1Gd1.ICSD.602087   | metal      | metal     |
| Al1Cu1Ho1.ICSD.184970   | metal      | metal     |
| Al1Cu1Nd1.ICSD.607037   | metal      | metal     |
| Al1Cu1O2.ICSD.32630     | insulator  | insulator |
| Al1Cu1O2.ICSD.95661     | insulator  | insulator |
| Al1Cu1Pr1.ICSD.607054   | metal      | metal     |
| Al1Cu1Pr1.ICSD.607067   | metal      | metal     |
| Al1Cu1Pt2.ICSD.107788   | metal      | metal     |
| Al1Cu1S2.ICSD.165739    | metal      | insulator |
| Al1Cu1S2.ICSD.187058    | insulator  | insulator |
| Al1Cu1Se2.ICSD.165741   | metal      | insulator |
| Al1Cu1Se2.ICSD.603539   | insulator  | insulator |
| Al1Cu1Tb1.ICSD.607130   | metal      | metal     |
| Al1Cu1Te2.ICSD.165743   | metal      | metal     |
| Al1Cu1Te2.ICSD.28735    | insulator  | insulator |
| Al1Cu1Ti2.ICSD.185881   | metal      | metal     |
| Al1Cu1Y1.ICSD.607186    | metal      | metal     |
| Al1Cu1Yb1.ICSD.607190   | metal      | metal     |
| Al1Cu1.ICSD.653749      | metal      | metal     |

Supplementary Table 34. Five-fold cross validated predictions for the metal/insulator classification (26/598).

| system                  | calculated | predicted |
|-------------------------|------------|-----------|
| Al1Cu2Hf1.ICSD.185283   | metal      | metal     |
| Al1Cu2Mn1.ICSD.607009   | metal      | metal     |
| Al1Cu2Re2.ICSD.57706    | metal      | metal     |
| Al1Cu2Sc1.ICSD.57709    | metal      | metal     |
| Al1Cu2Ti1.ICSD.656061   | metal      | metal     |
| Al1Cu2Zr1.ICSD.607205   | metal      | metal     |
| Al1Cu3U2.ICSD.23256     | metal      | metal     |
| Al1Cu3.ICSD.150823      | metal      | metal     |
| Al1Cu3.ICSD.151216      | metal      | metal     |
| Al1Cu3.ICSD.185891      | metal      | metal     |
| Al1Dy1Ge1.ICSD.607304   | metal      | metal     |
| Al1Dy1Ni1.ICSD.107417   | metal      | metal     |
| Al1Dy1Pd1.ICSD.607333   | metal      | metal     |
| Al1Dy1Pt1.ICSD.607335   | metal      | metal     |
| Al1Dy1Zn1.ICSD.607343   | metal      | metal     |
| Al1Dy1.ICSD.57735       | metal      | metal     |
| Al1Dy1.ICSD.57736       | metal      | metal     |
| Al1Dy2Ge2.ICSD.172061   | metal      | metal     |
| Al1Dy2Ni2.ICSD.607323   | metal      | metal     |
| Al1Dy2.ICSD.607222      | metal      | metal     |
| Al1Dy3Fe1S7.ICSD.607296 | insulator  | insulator |
| Al1Dy3N1.ICSD.607314    | metal      | metal     |
| Al1Dy3Ni1S7.ICSD.607332 | insulator  | insulator |
| Al1Dy3Ni8.ICSD.607316   | metal      | metal     |
| Al1Er1Ge1.ICSD.607405   | metal      | metal     |
| Al1Er1Ni1.ICSD.607431   | metal      | metal     |
| Al1Er1Pd1.ICSD.603267   | metal      | metal     |
| Al1Er1Pd1.ICSD.607432   | metal      | metal     |
| Al1Er1Pt1.ICSD.607433   | metal      | metal     |
| Al1Er1Zn1.ICSD.607444   | metal      | metal     |
| Al1Er1.ICSD.607346      | metal      | metal     |
| Al1Er2Ni2.ICSD.607424   | metal      | metal     |
| Al1Er2Si2.ICSD.92452    | metal      | metal     |
| Al1Er2.ICSD.607355      | metal      | metal     |
| Al1Er3N1.ICSD.607415    | metal      | metal     |
| Al1Er3Ni8.ICSD.607417   | metal      | metal     |
| Al1Eu1.ICSD.107525      | metal      | metal     |
| Al1F16Rb2Tb3.ICSD.98487 | metal      | insulator |
| Al1F1Na1O4P1.ICSD.40522 | insulator  | insulator |
| Al1F1O4Sr3.ICSD.50736   | insulator  | insulator |
| Al1F2Na5O8P2.ICSD.62645 | insulator  | insulator |
| Al1F3H2O2Pb1.ICSD.79740 | insulator  | insulator |
| Al1F3K2O4S1.ICSD.161272 | insulator  | insulator |
| Al1F3.ICSD.130021       | insulator  | insulator |
| Al1F3.ICSD.202681       | insulator  | insulator |
| Al1F3.ICSD.29131        | insulator  | insulator |
| Al1F3.ICSD.36034        | insulator  | insulator |
| Al1F3.ICSD.72174        | insulator  | insulator |
| Al1F3.ICSD.79816        | insulator  | insulator |
| Al1F4H4N1.ICSD.33539    | insulator  | insulator |

Supplementary Table 35. Five-fold cross validated predictions for the metal/insulator classification (27/598).

| system                   | calculated | predicted |
|--------------------------|------------|-----------|
| Al1F4K1.ICSD.16413       | insulator  | insulator |
| Al1F4K1.ICSD.166825      | insulator  | insulator |
| Al1F4K1.ICSD.285         | insulator  | insulator |
| Al1F4K1.ICSD.60525       | insulator  | insulator |
| Al1F4Na1.ICSD.166361     | insulator  | insulator |
| Al1F4Na1.ICSD.20572      | insulator  | insulator |
| Al1F4Rb1.ICSD.54120      | insulator  | insulator |
| Al1F4Rb1.ICSD.54123      | insulator  | insulator |
| Al1F4Rb1.ICSD.77914      | insulator  | insulator |
| Al1F4Ti1.ICSD.200637     | insulator  | insulator |
| Al1F4Ti1.ICSD.202455     | insulator  | insulator |
| Al1F5Fe1.ICSD.78012      | insulator  | insulator |
| Al1F5H10N2O1.ICSD.201652 | insulator  | insulator |
| Al1F5H2K2O1.ICSD.81863   | insulator  | insulator |
| Al1F5H4Mg1O2.ICSD.411650 | insulator  | insulator |
| Al1F5K2.ICSD.81864       | insulator  | insulator |
| Al1F5Mn1.ICSD.73812      | insulator  | insulator |
| Al1F5Mn1.ICSD.9912       | insulator  | insulator |
| Al1F5Ti2.ICSD.25616      | insulator  | insulator |
| Al1F6H12N3.ICSD.96591    | insulator  | insulator |
| Al1F6H18N6Ru1.ICSD.91763 | insulator  | insulator |
| Al1F6H6K1O2.ICSD.69434   | insulator  | insulator |
| Al1F6H8N2Na1.ICSD.249157 | insulator  | insulator |
| Al1F6K2Li1.ICSD.27672    | insulator  | insulator |
| Al1F6K2Li1.ICSD.408553   | insulator  | insulator |
| Al1F6K2Li1.ICSD.48149    | insulator  | insulator |
| Al1F6K2Na1.ICSD.164216   | insulator  | insulator |
| Al1F6K2Na1.ICSD.34201    | insulator  | insulator |
| Al1F6K3.ICSD.262078      | insulator  | insulator |
| Al1F6Li1Na2.ICSD.280906  | insulator  | insulator |
| Al1F6Li1Pd1.ICSD.73132   | insulator  | insulator |
| Al1F6Li1Sr1.ICSD.164563  | insulator  | insulator |
| Al1F6Li1Sr1.ICSD.68905   | insulator  | insulator |
| Al1F6Li1Yb1.ICSD.411131  | insulator  | insulator |
| Al1F6Li3.ICSD.34672      | insulator  | insulator |
| Al1F6Li3.ICSD.85171      | insulator  | insulator |
| Al1F6Na1Rb2.ICSD.290318  | insulator  | insulator |
| Al1F6Na3.ICSD.30201      | insulator  | insulator |
| Al1F6Na3.ICSD.74210      | insulator  | insulator |
| Al1F6Pd1Rb1.ICSD.78749   | insulator  | insulator |
| Al1F7Mg1Na2.ICSD.33509   | insulator  | insulator |
| Al1F7Mg1Na2.ICSD.33510   | insulator  | insulator |
| Al1F7Mg1Na2.ICSD.33511   | insulator  | insulator |
| Al1F7Na2Ni1.ICSD.72289   | insulator  | insulator |
| Al1F7Na2Zn1.ICSD.400729  | insulator  | insulator |
| Al1Fe1La3S7.ICSD.607565  | insulator  | insulator |
| Al1Fe1O3.ICSD.203203     | insulator  | insulator |
| Al1Fe1O5P1.ICSD.74760    | insulator  | insulator |
| Al1Fe1S7Tb3.ICSD.607622  | insulator  | insulator |
| Al1Fe1S7Y3.ICSD.607623   | metal      | insulator |

Supplementary Table 36. Five-fold cross validated predictions for the metal/insulator classification (28/598).

| system                     | calculated | predicted |
|----------------------------|------------|-----------|
| Al1Fe1Ti2.ICSD.185878      | metal      | metal     |
| Al1Fe1U1.ICSD.607706       | metal      | metal     |
| Al1Fe1.ICSD.165165         | metal      | metal     |
| Al1Fe1.ICSD.169548         | metal      | metal     |
| Al1Fe1.ICSD.169549         | metal      | metal     |
| Al1Fe2Mn1.ICSD.57806       | metal      | metal     |
| Al1Fe2Mo1.ICSD.57807       | metal      | metal     |
| Al1Fe2Ni1.ICSD.57808       | metal      | metal     |
| Al1Fe2O4.ICSD.76977        | metal      | metal     |
| Al1Fe2Ti1.ICSD.57827       | metal      | metal     |
| Al1Fe2V1.ICSD.57832        | insulator  | metal     |
| Al1Fe2.ICSD.57792          | metal      | metal     |
| Al1Fe3.ICSD.607485         | metal      | metal     |
| Al1Ga1Yb1.ICSD.607814      | metal      | metal     |
| Al1Gd1Ge1.ICSD.607864      | metal      | metal     |
| Al1Gd1Ni1.ICSD.607908      | metal      | metal     |
| Al1Gd1O3.ICSD.59848        | insulator  | insulator |
| Al1Gd1Pd1.ICSD.240059      | metal      | metal     |
| Al1Gd1Pd1.ICSD.240061      | metal      | metal     |
| Al1Gd1Zn1.ICSD.607941      | metal      | metal     |
| Al1Gd1.ICSD.150537         | metal      | metal     |
| Al1Gd1.ICSD.607823         | metal      | metal     |
| Al1Gd2Ge2.ICSD.95801       | metal      | metal     |
| Al1Gd2.ICSD.607837         | metal      | metal     |
| Al1Gd3Mg1S7.ICSD.607881    | insulator  | insulator |
| Al1Gd3Mn1S7.ICSD.607887    | insulator  | insulator |
| Al1Gd3N1.ICSD.607889       | metal      | metal     |
| Al1Gd3S7Ti1.ICSD.607920    | metal      | insulator |
| Al1Gd3S7V1.ICSD.607921     | insulator  | insulator |
| Al1Gd3S7Zn1.ICSD.607922    | insulator  | insulator |
| Al1Ge1Ho1.ICSD.607952      | metal      | metal     |
| Al1Ge1La1.ICSD.105149      | metal      | metal     |
| Al1Ge1Li1O4.ICSD.67238     | insulator  | insulator |
| Al1Ge1Li1.ICSD.152087      | insulator  | metal     |
| Al1Ge1Li3O5.ICSD.72098     | insulator  | insulator |
| Al1Ge1Mn1.ICSD.607974      | metal      | metal     |
| Al1Ge1Na1.ICSD.10147       | metal      | metal     |
| Al1Ge1O5Y1.ICSD.32744      | insulator  | insulator |
| Al1Ge1Pr1.ICSD.90160       | metal      | metal     |
| Al1Ge1Sc1.ICSD.608009      | metal      | metal     |
| Al1Ge1Sr1.ICSD.166379      | metal      | metal     |
| Al1Ge1Tb1.ICSD.608017      | metal      | metal     |
| Al1Ge1Y1.ICSD.76295        | metal      | metal     |
| Al1Ge2Nd1O7.ICSD.35144     | insulator  | insulator |
| Al1Ge3Tb2.ICSD.152747      | metal      | metal     |
| Al1Ge3Y2.ICSD.78969        | metal      | metal     |
| Al1Ge3Yb2.ICSD.423345      | metal      | metal     |
| Al1H0.67Ni1Zr1.ICSD.186405 | metal      | metal     |
| Al1H12N3O15.ICSD.96764     | insulator  | insulator |
| Al1H12N3O15.ICSD.96765     | insulator  | insulator |

Supplementary Table 37. Five-fold cross validated predictions for the metal/insulator classification (29/598).

| system                    | calculated | predicted |
|---------------------------|------------|-----------|
| Al1H1Li1O5P1.ICSD.68921   | metal      | insulator |
| Al1H1O10Si4.ICSD.33924    | insulator  | insulator |
| Al1H1O2.ICSD.166340       | insulator  | insulator |
| Al1H1O2.ICSD.169040       | metal      | metal     |
| Al1H1O2.ICSD.173074       | insulator  | insulator |
| Al1H1O2.ICSD.173075       | metal      | metal     |
| Al1H1O2.ICSD.173076       | insulator  | insulator |
| Al1H1O2.ICSD.173078       | metal      | metal     |
| Al1H1O2.ICSD.59609        | insulator  | insulator |
| Al1H1O4Si1.ICSD.85555     | insulator  | insulator |
| Al1H1Si1Sr1.ICSD.162868   | insulator  | insulator |
| Al1H24Li1Mg10.ICSD.158274 | insulator  | insulator |
| Al1H2Li1O5Si1.ICSD.161497 | insulator  | insulator |
| Al1H2Na3O9P2.ICSD.84643   | insulator  | insulator |
| Al1H3O3.ICSD.164050       | insulator  | insulator |
| Al1H3O3.ICSD.181006       | insulator  | insulator |
| Al1H3O3.ICSD.181008       | insulator  | insulator |
| Al1H3O3.ICSD.240781       | insulator  | insulator |
| Al1H3O3.ICSD.26830        | insulator  | insulator |
| Al1H3.ICSD.15225          | insulator  | insulator |
| Al1H3.ICSD.182534         | insulator  | insulator |
| Al1H3.ICSD.182535         | insulator  | insulator |
| Al1H3.ICSD.182536         | insulator  | insulator |
| Al1H4K1O14P4.ICSD.63033   | insulator  | insulator |
| Al1H4K1.ICSD.99082        | insulator  | insulator |
| Al1H4K1.ICSD.99083        | insulator  | insulator |
| Al1H4Li1.ICSD.22247       | insulator  | insulator |
| Al1H4Na1.ICSD.165838      | insulator  | insulator |
| Al1H4Na1.ICSD.99257       | insulator  | insulator |
| Al1H4Th2.ICSD.43313       | metal      | metal     |
| Al1H5Mg1.ICSD.165987      | insulator  | insulator |
| Al1H5O9P2.ICSD.34613      | insulator  | insulator |
| Al1H5Sr1.ICSD.156315      | insulator  | insulator |
| Al1H6I1O4.ICSD.424556     | insulator  | insulator |
| Al1H6K2Li1.ICSD.152890    | insulator  | insulator |
| Al1H6K2Li1.ICSD.245318    | insulator  | insulator |
| Al1H6K3.ICSD.152889       | metal      | insulator |
| Al1H6K3.ICSD.153683       | insulator  | insulator |
| Al1H6K3.ICSD.153684       | insulator  | insulator |
| Al1H6La1.ICSD.247038      | insulator  | insulator |
| Al1H6Li1Mg1.ICSD.165986   | insulator  | insulator |
| Al1H6Li1Na2.ICSD.152893   | insulator  | insulator |
| Al1H6Li3.ICSD.99217       | insulator  | insulator |
| Al1H6Na3.ICSD.153680      | metal      | insulator |
| Al1H6Na3.ICSD.154909      | metal      | insulator |
| Al1H6Nd1.ICSD.247044      | insulator  | metal     |
| Al1H6Pr1.ICSD.247041      | metal      | insulator |
| Al1H6Pr1.ICSD.247042      | insulator  | metal     |
| Al1H8K1N4.ICSD.2538       | insulator  | insulator |
| Al1H8N4Rb1.ICSD.40168     | insulator  | insulator |

Supplementary Table 38. Five-fold cross validated predictions for the metal/insulator classification (30/598).

| system                  | calculated | predicted |
|-------------------------|------------|-----------|
| Al1Hf1Ni1_ICSD_608130   | metal      | metal     |
| Al1Hf1Ni2_ICSD_608123   | metal      | metal     |
| Al1Hf1Pd2_ICSD_57906    | metal      | metal     |
| Al1Hf1Pt1_ICSD_261008   | metal      | metal     |
| Al1Hf1Pt1_ICSD_608141   | metal      | metal     |
| Al1Hf1Pt2_ICSD_608138   | metal      | metal     |
| Al1Hf1_ICSD_107828      | metal      | metal     |
| Al1Hf2_ICSD_608076      | metal      | metal     |
| Al1Hf3N1_ICSD_602284    | metal      | metal     |
| Al1Ho1Ni1_ICSD_107223   | metal      | metal     |
| Al1Ho1Pd1_ICSD_608213   | metal      | metal     |
| Al1Ho1Pt1_ICSD_608215   | metal      | metal     |
| Al1Ho1_ICSD_608166      | metal      | metal     |
| Al1Ho2Ni2_ICSD_608205   | metal      | metal     |
| Al1Ho2Si2_ICSD_92451    | metal      | metal     |
| Al1Ho2_ICSD_57910       | metal      | metal     |
| Al1Ho3N1_ICSD_608196    | metal      | metal     |
| Al1Ho3Ni8_ICSD_608198   | metal      | metal     |
| Al1I2Pd5_ICSD_14164     | metal      | metal     |
| Al1I3O9_ICSD_152758     | insulator  | insulator |
| Al1I3_ICSD_391247       | insulator  | insulator |
| Al1I4In1_ICSD_418802    | insulator  | insulator |
| Al1I4Na1_ICSD_400521    | insulator  | insulator |
| Al1I4Th1_ICSD_419827    | insulator  | insulator |
| Al1I7Te1_ICSD_401395    | insulator  | insulator |
| Al1I8P1_ICSD_35403      | insulator  | insulator |
| Al1In1S3_ICSD_8257      | insulator  | insulator |
| Al1Ir1Th1_ICSD_608247   | metal      | metal     |
| Al1Ir1U1_ICSD_608249    | metal      | metal     |
| Al1Ir1U1_ICSD_608251    | metal      | metal     |
| Al1Ir1_ICSD_57928       | metal      | metal     |
| Al1K1Mo2O8_ICSD_28018   | insulator  | insulator |
| Al1K1O2_ICSD_151883     | insulator  | insulator |
| Al1K1O2_ICSD_169481     | insulator  | insulator |
| Al1K1O2_ICSD_262975     | insulator  | insulator |
| Al1K1O4Si1_ICSD_34350   | insulator  | insulator |
| Al1K1O4Si1_ICSD_83449   | insulator  | insulator |
| Al1K1O7P2_ICSD_2888     | insulator  | insulator |
| Al1K1O8S2_ICSD_6305     | insulator  | insulator |
| Al1K1O8Si3_ICSD_83536   | insulator  | insulator |
| Al1K1Sb4_ICSD_300157    | insulator  | insulator |
| Al1K1Te2_ICSD_411171    | insulator  | insulator |
| Al1K1Te2_ICSD_44703     | insulator  | insulator |
| Al1K2Li1P2_ICSD_77275   | insulator  | insulator |
| Al1K2Na1P2_ICSD_73279   | insulator  | insulator |
| Al1K6Na3Sb4_ICSD_401209 | insulator  | insulator |
| Al1La1O3_ICSD_153821    | insulator  | insulator |
| Al1La1O3_ICSD_153830    | insulator  | insulator |
| Al1La1O3_ICSD_153836    | insulator  | metal     |
| Al1La1O3_ICSD_180416    | insulator  | insulator |

Supplementary Table 39. Five-fold cross validated predictions for the metal/insulator classification (31/598).

| system                  | calculated | predicted |
|-------------------------|------------|-----------|
| Al1La1O3_ICSD_180417    | insulator  | insulator |
| Al1La1O3_ICSD_90549     | insulator  | insulator |
| Al1La1Pt1_ICSD_603295   | metal      | metal     |
| Al1La1Si2_ICSD_94502    | metal      | metal     |
| Al1La1_ICSD_54470       | metal      | metal     |
| Al1La3Mg1S7_ICSD_608298 | insulator  | insulator |
| Al1La3Mn1S7_ICSD_608303 | insulator  | insulator |
| Al1La3N1_ICSD_185959    | metal      | metal     |
| Al1La3Ni1S7_ICSD_608317 | insulator  | insulator |
| Al1La3S7Ti1_ICSD_608322 | insulator  | insulator |
| Al1La3S7V1_ICSD_608323  | insulator  | insulator |
| Al1La3S7Zn1_ICSD_608324 | insulator  | insulator |
| Al1La3_ICSD_57932       | metal      | metal     |
| Al1La3_ICSD_603210      | metal      | metal     |
| Al1La6Mg22_ICSD_154679  | metal      | metal     |
| Al1Li1Mo2O8_ICSD_16175  | insulator  | insulator |
| Al1Li1Na2P2_ICSD_402083 | insulator  | insulator |
| Al1Li1O12P4_ICSD_74860  | insulator  | insulator |
| Al1Li1O2_ICSD_23815     | insulator  | insulator |
| Al1Li1O2_ICSD_28288     | insulator  | insulator |
| Al1Li1O4Si1_ICSD_22011  | insulator  | insulator |
| Al1Li1O4Si1_ICSD_22014  | insulator  | insulator |
| Al1Li1O4Si1_ICSD_32595  | insulator  | insulator |
| Al1Li1O4Si1_ICSD_38167  | insulator  | insulator |
| Al1Li1O4Si1_ICSD_97909  | insulator  | insulator |
| Al1Li1O6Si2_ICSD_158512 | insulator  | insulator |
| Al1Li1O6Si2_ICSD_30521  | insulator  | insulator |
| Al1Li1S2_ICSD_608360    | insulator  | insulator |
| Al1Li1Se2_ICSD_280225   | insulator  | insulator |
| Al1Li1Si1_ICSD_413257   | insulator  | insulator |
| Al1Li1Te2_ICSD_162672   | insulator  | insulator |
| Al1Li1_ICSD_240114      | metal      | metal     |
| Al1Li1_ICSD_240125      | metal      | metal     |
| Al1Li1_ICSD_262064      | metal      | metal     |
| Al1Li1_ICSD_262069      | metal      | metal     |
| Al1Li2Pd1_ICSD_105504   | metal      | metal     |
| Al1Li2Pt1_ICSD_105506   | metal      | metal     |
| Al1Li2Rh1_ICSD_105508   | metal      | metal     |
| Al1Li3N2_ICSD_25565     | insulator  | insulator |
| Al1Li5O4_ICSD_1037      | insulator  | insulator |
| Al1Li5O4_ICSD_42697     | insulator  | insulator |
| Al1Lu1Ni1_ICSD_608382   | metal      | metal     |
| Al1Lu1Pd1_ICSD_603268   | metal      | metal     |
| Al1Lu1Pt1_ICSD_608394   | metal      | metal     |
| Al1Lu1Si1_ICSD_415373   | metal      | metal     |
| Al1Lu2Si2_ICSD_92454    | metal      | metal     |
| Al1Lu3N1_ICSD_608380    | metal      | metal     |
| Al1Lu3Ni8_ICSD_608381   | metal      | metal     |
| Al1Mg1O5P1_ICSD_156822  | insulator  | insulator |
| Al1Mg1Si1_ICSD_153549   | metal      | metal     |

Supplementary Table 40. Five-fold cross validated predictions for the metal/insulator classification (32/598).

| system                  | calculated | predicted |
|-------------------------|------------|-----------|
| Al1Mg1Y1.ICSD.160908    | metal      | metal     |
| Al1Mg3Pt2.ICSD.105510   | metal      | metal     |
| Al1Mg4Si6.ICSD.54781    | metal      | metal     |
| Al1Mn1Ni2.ICSD.57976    | metal      | metal     |
| Al1Mn1Pd2.ICSD.57981    | metal      | metal     |
| Al1Mn1Pr3S7.ICSD.608498 | insulator  | insulator |
| Al1Mn1Pt1.ICSD.57984    | metal      | metal     |
| Al1Mn1Pt2.ICSD.57985    | metal      | metal     |
| Al1Mn1Rh2.ICSD.57986    | metal      | metal     |
| Al1Mn1Ti2.ICSD.185877   | insulator  | metal     |
| Al1Mn1.ICSD.57969       | metal      | metal     |
| Al1Mn1.ICSD.608471      | metal      | metal     |
| Al1Mn2V1.ICSD.57994     | metal      | metal     |
| Al1Mn3.ICSD.181801      | metal      | metal     |
| Al1Mo1O7V1.ICSD.280775  | insulator  | insulator |
| Al1Mo2Na1O8.ICSD.281210 | insulator  | insulator |
| Al1Mo2O8Ti1.ICSD.250339 | insulator  | insulator |
| Al1Mo3.ICSD.57999       | metal      | metal     |
| Al1Mo4S8.ICSD.36561     | metal      | metal     |
| Al1Mo4S8.ICSD.36564     | insulator  | metal     |
| Al1N1Na3O9P3.ICSD.75366 | insulator  | insulator |
| Al1N1Nd2O3.ICSD.201358  | metal      | insulator |
| Al1N1Nd3.ICSD.52638     | metal      | metal     |
| Al1N1Pr3.ICSD.52639     | metal      | metal     |
| Al1N1Tb3.ICSD.608634    | metal      | metal     |
| Al1N1Ti2.ICSD.157766    | metal      | metal     |
| Al1N1Ti3.ICSD.52642     | metal      | metal     |
| Al1N1Zr2.ICSD.157763    | metal      | metal     |
| Al1N1Zr3.ICSD.29521     | metal      | metal     |
| Al1N1.ICSD.105522       | insulator  | insulator |
| Al1N1.ICSD.163950       | insulator  | insulator |
| Al1N1.ICSD.163951       | insulator  | insulator |
| Al1N1.ICSD.188512       | insulator  | insulator |
| Al1N1.ICSD.31169        | insulator  | insulator |
| Al1N3Nb4.ICSD.181352    | metal      | metal     |
| Al1N3Ta4.ICSD.181353    | metal      | metal     |
| Al1N3Ti4.ICSD.91772     | metal      | metal     |
| Al1N3V4.ICSD.181348     | metal      | metal     |
| Al1Na1O2.ICSD.22216     | insulator  | insulator |
| Al1Na1O2.ICSD.79404     | insulator  | insulator |
| Al1Na1O4Si1.ICSD.34884  | insulator  | insulator |
| Al1Na1O4Si1.ICSD.36324  | insulator  | insulator |
| Al1Na1O6Si2.ICSD.162546 | insulator  | insulator |
| Al1Na1O7P2.ICSD.400462  | insulator  | insulator |
| Al1Na1O8Si3.ICSD.77425  | metal      | insulator |
| Al1Na1Se2.ICSD.300173   | insulator  | insulator |
| Al1Na1Se2.ICSD.44704    | insulator  | insulator |
| Al1Na1Si1.ICSD.10146    | metal      | metal     |
| Al1Na1Te2.ICSD.44701    | insulator  | insulator |
| Al1Na3P2.ICSD.402081    | insulator  | insulator |

Supplementary Table 41. Five-fold cross validated predictions for the metal/insulator classification (33/598).

| system                        | calculated | predicted |
|-------------------------------|------------|-----------|
| Al1Nb1Ni2.ICSD.608701         | metal      | metal     |
| Al1Nb1O4.ICSD.24078           | insulator  | insulator |
| Al1Nb1Ru2.ICSD.105524         | metal      | metal     |
| Al1Nb2.ICSD.601188            | metal      | metal     |
| Al1Nb3.ICSD.608655            | metal      | metal     |
| Al1Nd1Ni1.ICSD.608770         | metal      | metal     |
| Al1Nd1O3.ICSD.35550           | metal      | metal     |
| Al1Nd1O3.ICSD.90573           | insulator  | insulator |
| Al1Nd1Pd1.ICSD.603266         | metal      | metal     |
| Al1Nd1Pd2.ICSD.604244         | metal      | metal     |
| Al1Nd1Pt1.ICSD.150174         | metal      | metal     |
| Al1Nd1.ICSD.181160            | metal      | metal     |
| Al1Nd2Ni2.ICSD.608769         | metal      | metal     |
| Al1Nd3Ni8.ICSD.608765         | metal      | metal     |
| Al1Ni0.33Ru0.67U1.ICSD.164389 | metal      | metal     |
| Al1Ni1Pr1.ICSD.608820         | metal      | metal     |
| Al1Ni1Pr3S7.ICSD.608833       | insulator  | insulator |
| Al1Ni1Pu1.ICSD.608834         | metal      | metal     |
| Al1Ni1S7Y3.ICSD.608836        | insulator  | insulator |
| Al1Ni1Tb1.ICSD.105534         | metal      | metal     |
| Al1Ni1Th1.ICSD.608897         | metal      | metal     |
| Al1Ni1Ti2.ICSD.185880         | metal      | metal     |
| Al1Ni1U1.ICSD.608935          | metal      | metal     |
| Al1Ni1Y1.ICSD.608947          | metal      | metal     |
| Al1Ni1Yb1.ICSD.608960         | metal      | metal     |
| Al1Ni1Zr1.ICSD.608978         | metal      | metal     |
| Al1Ni1.ICSD.608805            | metal      | metal     |
| Al1Ni2Pr2.ICSD.608823         | metal      | metal     |
| Al1Ni2Sc1.ICSD.58050          | metal      | metal     |
| Al1Ni2Ta1.ICSD.58055          | metal      | metal     |
| Al1Ni2Tb2.ICSD.608886         | metal      | metal     |
| Al1Ni2Ti1.ICSD.165902         | metal      | metal     |
| Al1Ni2V1.ICSD.58071           | metal      | metal     |
| Al1Ni2Y2.ICSD.160936          | metal      | metal     |
| Al1Ni2Zr1.ICSD.608975         | metal      | metal     |
| Al1Ni2Zr4.ICSD.164058         | metal      | metal     |
| Al1Ni3.ICSD.107862            | metal      | metal     |
| Al1Ni3.ICSD.604410            | metal      | metal     |
| Al1Ni3.ICSD.608800            | metal      | metal     |
| Al1Ni4U1.ICSD.58069           | metal      | metal     |
| Al1Ni4Zr5.ICSD.415704         | metal      | metal     |
| Al1Ni8Tb3.ICSD.608879         | metal      | metal     |
| Al1Ni8Y3.ICSD.160938          | metal      | metal     |
| Al1O1.ICSD.28920              | metal      | insulator |
| Al1O2Rb1.ICSD.28373           | insulator  | insulator |
| Al1O2Ti1.ICSD.29010           | insulator  | insulator |
| Al1O3Pr1.ICSD.35549           | metal      | metal     |
| Al1O3Pr1.ICSD.90566           | insulator  | insulator |
| Al1O3Y1.ICSD.27100            | insulator  | insulator |
| Al1O3Y1.ICSD.4115             | insulator  | insulator |

Supplementary Table 42. Five-fold cross validated predictions for the metal/insulator classification (34/598).

| system                  | calculated | predicted |
|-------------------------|------------|-----------|
| Al1O4P1.ICSD.158619     | insulator  | insulator |
| Al1O4P1.ICSD.159272     | insulator  | insulator |
| Al1O4P1.ICSD.159273     | insulator  | insulator |
| Al1O4P1.ICSD.162670     | insulator  | insulator |
| Al1O4P1.ICSD.24511      | insulator  | insulator |
| Al1O4P1.ICSD.261306     | insulator  | insulator |
| Al1O4P1.ICSD.279582     | insulator  | insulator |
| Al1O4P1.ICSD.417475     | insulator  | insulator |
| Al1O4P1.ICSD.50101      | insulator  | insulator |
| Al1O4P1.ICSD.66996      | insulator  | insulator |
| Al1O4P1.ICSD.66998      | insulator  | insulator |
| Al1O4P1.ICSD.66999      | insulator  | insulator |
| Al1O4P1.ICSD.9643       | insulator  | insulator |
| Al1O4P1.ICSD.98384      | insulator  | insulator |
| Al1O4Rb1Si1.ICSD.160823 | insulator  | insulator |
| Al1O4Rb1Si1.ICSD.4335   | insulator  | insulator |
| Al1O4Si1Ti1.ICSD.89722  | insulator  | insulator |
| Al1O4Ta1.ICSD.33885     | insulator  | insulator |
| Al1O4Ta1.ICSD.67676     | insulator  | insulator |
| Al1O4V2.ICSD.151457     | metal      | metal     |
| Al1O4V2.ICSD.60413      | metal      | metal     |
| Al1O4W1.ICSD.4164       | insulator  | insulator |
| Al1O9P3.ICSD.26759      | insulator  | insulator |
| Al1Os1.ICSD.609006      | metal      | metal     |
| Al1P1Pt5.ICSD.609024    | metal      | metal     |
| Al1P1S4.ICSD.15910      | insulator  | insulator |
| Al1P1S4.ICSD.56821      | metal      | insulator |
| Al1P1.ICSD.67770        | insulator  | insulator |
| Al1P1.ICSD.67783        | insulator  | insulator |
| Al1Pd1Pr1.ICSD.603265   | metal      | metal     |
| Al1Pd1Sm1.ICSD.609058   | metal      | metal     |
| Al1Pd1Tb1.ICSD.160951   | metal      | metal     |
| Al1Pd1Tb1.ICSD.609059   | metal      | metal     |
| Al1Pd1Th1.ICSD.609060   | metal      | metal     |
| Al1Pd1Y1.ICSD.156923    | metal      | metal     |
| Al1Pd1Y1.ICSD.609063    | metal      | metal     |
| Al1Pd1Yb1.ICSD.370028   | metal      | metal     |
| Al1Pd1.ICSD.58112       | metal      | metal     |
| Al1Pd1.ICSD.58113       | metal      | metal     |
| Al1Pd1.ICSD.58114       | metal      | metal     |
| Al1Pd2Pr1.ICSD.604243   | metal      | metal     |
| Al1Pd2Sc1.ICSD.58120    | metal      | metal     |
| Al1Pd2Zr1.ICSD.58122    | metal      | metal     |
| Al1Pd2.ICSD.58115       | metal      | metal     |
| Al1Pd5.ICSD.245328      | metal      | metal     |
| Al1Pr1Pt1.ICSD.150173   | metal      | metal     |
| Al1Pr1Si2.ICSD.152802   | metal      | metal     |
| Al1Pr1.ICSD.108897      | metal      | metal     |
| Al1Pr1.ICSD.181159      | metal      | metal     |
| Al1Pr1.ICSD.58123       | metal      | metal     |

Supplementary Table 43. Five-fold cross validated predictions for the metal/insulator classification (35/598).

| system                 | calculated | predicted |
|------------------------|------------|-----------|
| Al1Pr3.ICSD.58124      | metal      | metal     |
| Al1Pr3.ICSD.609101     | metal      | metal     |
| Al1Pr3.ICSD.657240     | metal      | metal     |
| Al1Pt1Sm1.ICSD.609157  | metal      | metal     |
| Al1Pt1Tb1.ICSD.609159  | metal      | metal     |
| Al1Pt1Th1.ICSD.609160  | metal      | metal     |
| Al1Pt1Ti1.ICSD.163350  | metal      | metal     |
| Al1Pt1U1.ICSD.609163   | metal      | metal     |
| Al1Pt1Y1.ICSD.609165   | metal      | metal     |
| Al1Pt1Yb1.ICSD.604063  | metal      | metal     |
| Al1Pt1Zr1.ICSD.156266  | metal      | metal     |
| Al1Pt1Zr1.ICSD.609169  | metal      | metal     |
| Al1Pt1.ICSD.58128      | metal      | metal     |
| Al1Pt1.ICSD.609146     | metal      | metal     |
| Al1Pt2Zr1.ICSD.609167  | metal      | metal     |
| Al1Pt2.ICSD.459        | metal      | metal     |
| Al1Pt2.ICSD.58130      | metal      | metal     |
| Al1Pt3.ICSD.107439     | metal      | metal     |
| Al1Pt3.ICSD.609128     | metal      | metal     |
| Al1Rb6Sb3.ICSD.300217  | insulator  | insulator |
| Al1Re1.ICSD.58146      | metal      | metal     |
| Al1Re2.ICSD.58147      | metal      | metal     |
| Al1Rh1Th1.ICSD.609217  | metal      | metal     |
| Al1Rh1U1.ICSD.106246   | metal      | metal     |
| Al1Rh1U1.ICSD.656982   | metal      | metal     |
| Al1Rh1.ICSD.609212     | metal      | metal     |
| Al1Ru1U1.ICSD.609243   | metal      | metal     |
| Al1Ru1.ICSD.609238     | metal      | metal     |
| Al1Sb1.ICSD.41994      | metal      | metal     |
| Al1Sb1.ICSD.609290     | insulator  | metal     |
| Al1Sb9Yb11.ICSD.186084 | insulator  | metal     |
| Al1Sc1.ICSD.609299     | metal      | metal     |
| Al1Sc1.ICSD.609303     | metal      | metal     |
| Al1Sc2Si2.ICSD.52653   | metal      | metal     |
| Al1Sc2.ICSD.183218     | metal      | metal     |
| Al1Se2Ti1.ICSD.100130  | insulator  | insulator |
| Al1Si1Sm1.ICSD.151717  | metal      | metal     |
| Al1Si1Sr1.ICSD.162865  | metal      | metal     |
| Al1Si1Te3.ICSD.75001   | insulator  | insulator |
| Al1Si1Tm1.ICSD.415372  | metal      | metal     |
| Al1Si1Y1.ICSD.99138    | metal      | metal     |
| Al1Si2Tm2.ICSD.92453   | metal      | metal     |
| Al1Si2Y2.ICSD.92450    | metal      | metal     |
| Al1Si2Yb2.ICSD.92455   | metal      | metal     |
| Al1Sm1.ICSD.58104      | metal      | metal     |
| Al1Sm1.ICSD.609374     | metal      | metal     |
| Al1Sm3.ICSD.58106      | metal      | metal     |
| Al1Sn1.ICSD.107883     | metal      | metal     |
| Al1Sn3Zr5.ICSD.106250  | metal      | metal     |
| Al1Sr1.ICSD.344        | metal      | metal     |

Supplementary Table 44. Five-fold cross validated predictions for the metal/insulator classification (36/598).

| system                 | calculated | predicted |
|------------------------|------------|-----------|
| Al1Ta2_ICSD_107888     | metal      | metal     |
| Al1Ta2_ICSD_609429     | metal      | metal     |
| Al1Tb1_ICSD_181161     | metal      | metal     |
| Al1Tb1_ICSD_609450     | metal      | metal     |
| Al1Tb2_ICSD_609457     | metal      | metal     |
| Al1Tb3_ICSD_58173      | metal      | metal     |
| Al1Tc2_ICSD_609480     | metal      | metal     |
| Al1Th1_ICSD_609503     | metal      | metal     |
| Al1Th2_ICSD_609491     | metal      | metal     |
| Al1Ti1Zr2_ICSD_185119  | metal      | metal     |
| Al1Ti1_ICSD_290012     | metal      | metal     |
| Al1Ti1_ICSD_58187      | metal      | metal     |
| Al1Ti2V1_ICSD_185875   | metal      | metal     |
| Al1Ti2Zn1_ICSD_185882  | metal      | metal     |
| Al1Ti3_ICSD_189695     | metal      | metal     |
| Al1Ti3_ICSD_99779      | metal      | metal     |
| Al1Tm1Zn1_ICSD_609569  | metal      | metal     |
| Al1V3_ICSD_609619      | metal      | metal     |
| Al1Y1Zn1_ICSD_609667   | metal      | metal     |
| Al1Y1_ICSD_181158      | metal      | metal     |
| Al1Y1_ICSD_58209       | metal      | metal     |
| Al1Y2_ICSD_58211       | metal      | metal     |
| Al1Y3_ICSD_58212       | metal      | metal     |
| Al1Zr1_ICSD_58227      | metal      | metal     |
| Al1Zr2_ICSD_150774     | metal      | metal     |
| Al1Zr2_ICSD_609694     | metal      | metal     |
| Al1Zr3_ICSD_609742     | metal      | metal     |
| Al1_ICSD_187080        | metal      | metal     |
| Al1_ICSD_240129        | metal      | metal     |
| Al2.3Sr2.7_ICSD_609406 | metal      | metal     |
| Al20Ca1Cr2_ICSD_606307 | metal      | metal     |
| Al20Ce1Co2_ICSD_57562  | metal      | metal     |
| Al20Ce1Cr2_ICSD_107751 | metal      | metal     |
| Al20Ce1Ti2_ICSD_236257 | metal      | metal     |
| Al20Ce1V2_ICSD_236262  | metal      | metal     |
| Al20Cr2Er1_ICSD_606768 | metal      | metal     |
| Al20Cr2Ho1_ICSD_606789 | metal      | metal     |
| Al20Cr2La1_ICSD_236265 | metal      | metal     |
| Al20Cr2Nd1_ICSD_606816 | metal      | metal     |
| Al20Cr2Pr1_ICSD_236267 | metal      | metal     |
| Al20Cr2Sm1_ICSD_236268 | metal      | metal     |
| Al20Cr2Y1_ICSD_606867  | metal      | metal     |
| Al20Cr2Yb1_ICSD_236269 | metal      | metal     |
| Al20Eu1V2_ICSD_105131  | metal      | metal     |
| Al20Gd1V2_ICSD_157333  | metal      | metal     |
| Al20La1Ti2_ICSD_236256 | metal      | metal     |
| Al20La1V2_ICSD_236261  | metal      | metal     |
| Al20Pr1Ti2_ICSD_236258 | metal      | metal     |
| Al20Pr1V2_ICSD_236263  | metal      | metal     |
| Al20Sm1V2_ICSD_236264  | metal      | metal     |

Supplementary Table 45. Five-fold cross validated predictions for the metal/insulator classification (37/598).

| system                     | calculated | predicted |
|----------------------------|------------|-----------|
| Al20Ti2Yb1_ICSD_236260     | metal      | metal     |
| Al20U1V2_ICSD_107251       | metal      | metal     |
| Al21Pd8_ICSD_58119         | metal      | metal     |
| Al21Pt8_ICSD_58136         | metal      | metal     |
| Al22Na2O34_ICSD_34905      | insulator  | insulator |
| Al23Ce4Ni6_ICSD_240163     | metal      | metal     |
| Al23Ni6Y4_ICSD_160933      | metal      | metal     |
| Al23Ni6Yb4_ICSD_402094     | metal      | metal     |
| Al23V4_ICSD_174002         | metal      | metal     |
| Al24Ce3Cu8Mn1_ICSD_20315   | metal      | metal     |
| Al2As2Cs2O7_ICSD_154363    | insulator  | insulator |
| Al2As3K3_ICSD_60950        | insulator  | insulator |
| Al2As4Ca3_ICSD_60161       | insulator  | insulator |
| Al2As4Sr3_ICSD_423787      | insulator  | insulator |
| Al2Au1_ICSD_606031         | metal      | metal     |
| Al2Au2Ce1_ICSD_658114      | metal      | metal     |
| Al2Au2Dy1_ICSD_658121      | metal      | metal     |
| Al2Au2Gd1_ICSD_658119      | metal      | metal     |
| Al2Au2La1_ICSD_658113      | metal      | metal     |
| Al2Au2Nd1_ICSD_658116      | metal      | metal     |
| Al2Au2Pr1_ICSD_658115      | metal      | metal     |
| Al2Au2Sm1_ICSD_658117      | metal      | metal     |
| Al2Au2Sr1_ICSD_658124      | metal      | metal     |
| Al2Au2Tb1_ICSD_658120      | metal      | metal     |
| Al2Au2Th1_ICSD_658122      | metal      | metal     |
| Al2Au2U1_ICSD_658123       | metal      | metal     |
| Al2B1Ce1Ru2_ICSD_186682    | metal      | metal     |
| Al2B1La1Ru2_ICSD_174342    | metal      | metal     |
| Al2B1Re3_ICSD_43842        | metal      | metal     |
| Al2B2Ba1O7_ICSD_409171     | insulator  | insulator |
| Al2B2Ca1O7_ICSD_86785      | insulator  | insulator |
| Al2B2Cs2O7_ICSD_423471     | insulator  | insulator |
| Al2B2K2O7_ICSD_409420      | insulator  | insulator |
| Al2B2Na2O7_ICSD_93389      | insulator  | insulator |
| Al2B2O7Sr1_ICSD_89423      | insulator  | insulator |
| Al2B2O7Sr1_ICSD_91031      | insulator  | insulator |
| Al2B2Ru3_ICSD_43843        | metal      | metal     |
| Al2Ba1Ge2O8_ICSD_1282      | insulator  | insulator |
| Al2Ba1Ge2_ICSD_98514       | metal      | metal     |
| Al2Ba1Ge2_ICSD_98515       | metal      | metal     |
| Al2Ba1O4_ICSD_21080        | insulator  | insulator |
| Al2Ba1O4_ICSD_246027       | insulator  | insulator |
| Al2Ba1O7Sb2_ICSD_154362    | insulator  | insulator |
| Al2Ba1S4_ICSD_35136        | insulator  | insulator |
| Al2Ba1Si2_ICSD_153384      | metal      | metal     |
| Al2Ba1Si2_ICSD_153385      | metal      | metal     |
| Al2Ba1Si2_ICSD_249561      | metal      | metal     |
| Al2Ba1Te4_ICSD_41165       | insulator  | insulator |
| Al2Ba1_ICSD_57512          | metal      | metal     |
| Al2Ba2Ca1F14Mg1_ICSD_20393 | insulator  | insulator |

Supplementary Table 46. Five-fold cross validated predictions for the metal/insulator classification (38/598).

| system                        | calculated | predicted |
|-------------------------------|------------|-----------|
| Al2Ba2Ga1.33.ICSD_415931      | metal      | metal     |
| Al2Ba3F12.ICSD_413546         | insulator  | insulator |
| Al2Ba3N4.ICSD_410578          | insulator  | insulator |
| Al2Ba3O12Si3.ICSD_27386       | insulator  | insulator |
| Al2Ba5Ge7.ICSD_417659         | metal      | metal     |
| Al2Ba7O19Sc6.ICSD_39442       | insulator  | insulator |
| Al2Be1O4.ICSD_34806           | insulator  | insulator |
| Al2Be2Cl2Na8O24Si8.ICSD_34665 | insulator  | insulator |
| Al2Be3O18Si6.ICSD_202091      | insulator  | insulator |
| Al2Bi2Br12.ICSD_414262        | insulator  | insulator |
| Al2Bi2Cl12.ICSD_414261        | insulator  | insulator |
| Al2Bi6Ca5.ICSD_36364          | metal      | metal     |
| Al2Br6N2S2.ICSD_38378         | insulator  | insulator |
| Al2Br6N2Se2.ICSD_82802        | insulator  | insulator |
| Al2Br6.ICSD_83433             | insulator  | insulator |
| Al2Br6.ICSD_83434             | insulator  | insulator |
| Al2Br7K1.ICSD_2592            | insulator  | insulator |
| Al2Br8Ti1.ICSD_39243          | insulator  | insulator |
| Al2Br8Ti1.ICSD_40904          | insulator  | insulator |
| Al2C1Co1Ta3.ICSD_418908       | metal      | metal     |
| Al2C1Ni1Ti3.ICSD_43862        | metal      | metal     |
| Al2C2Mg1.ICSD_85739           | insulator  | insulator |
| Al2C3Th2.ICSD_81572           | metal      | metal     |
| Al2C6H22O2Si2.ICSD_172440     | insulator  | insulator |
| Al2Ca1Cl8.ICSD_56730          | insulator  | insulator |
| Al2Ca1Ga2.ICSD_300209         | metal      | metal     |
| Al2Ca1Ge2.ICSD_606320         | metal      | metal     |
| Al2Ca1H4O10Si2.ICSD_80837     | insulator  | insulator |
| Al2Ca1H6O13Si3.ICSD_30967     | insulator  | insulator |
| Al2Ca1H8.ICSD_246482          | insulator  | insulator |
| Al2Ca1O4.ICSD_172780          | insulator  | insulator |
| Al2Ca1O4.ICSD_41661           | insulator  | insulator |
| Al2Ca1S4.ICSD_46016           | insulator  | insulator |
| Al2Ca1Si2.ICSD_20278          | metal      | metal     |
| Al2Ca1Zn2.ICSD_57550          | metal      | metal     |
| Al2Ca1.ICSD_418966            | metal      | metal     |
| Al2Ca2Fe1H1O13Si3.ICSD_63661  | insulator  | insulator |
| Al2Ca2H1Mn1O13Si3.ICSD_26354  | insulator  | insulator |
| Al2Ca2O7Si1.ICSD_24588        | insulator  | insulator |
| Al2Ca2O9Sn2.ICSD_260890       | insulator  | insulator |
| Al2Ca3F14Na2.ICSD_202657      | insulator  | insulator |
| Al2Ca3F8H6O8S1.ICSD_31248     | insulator  | insulator |
| Al2Ca3Ge2.ICSD_52616          | metal      | metal     |
| Al2Ca3Ge3.ICSD_31982          | metal      | metal     |
| Al2Ca3H12O12.ICSD_34227       | insulator  | insulator |
| Al2Ca3N4.ICSD_280347          | insulator  | insulator |
| Al2Ca3N4.ICSD_280348          | insulator  | insulator |
| Al2Ca3N4.ICSD_280349          | insulator  | insulator |
| Al2Ca3O12Si3.ICSD_94614       | insulator  | insulator |
| Al2Ca3O6.ICSD_151369          | metal      | insulator |

Supplementary Table 47. Five-fold cross validated predictions for the metal/insulator classification (39/598).

| system                    | calculated | predicted |
|---------------------------|------------|-----------|
| Al2Ca3Si2.ICSD_100126     | metal      | metal     |
| Al2Ca5Sb6.ICSD_183853     | insulator  | insulator |
| Al2Cd1O4.ICSD_183382      | insulator  | insulator |
| Al2Cd1S4.ICSD_25634       | insulator  | insulator |
| Al2Cd1S4.ICSD_43025       | insulator  | insulator |
| Al2Cd1Se4.ICSD_174192     | insulator  | insulator |
| Al2Cd1Se4.ICSD_51423      | insulator  | insulator |
| Al2Cd1Te4.ICSD_25640      | insulator  | insulator |
| Al2Cd2Cl8.ICSD_59173      | metal      | insulator |
| Al2Cd3O12Si3.ICSD_27384   | insulator  | insulator |
| Al2Ce1Ga2.ICSD_55789      | metal      | metal     |
| Al2Ce1Ge2.ICSD_604134     | metal      | metal     |
| Al2Ce1Pd2.ICSD_658138     | metal      | metal     |
| Al2Ce1Pt1.ICSD_658140     | metal      | metal     |
| Al2Ce1Pt3.ICSD_658142     | metal      | metal     |
| Al2Ce1Zn2.ICSD_57594      | metal      | metal     |
| Al2Ce1.ICSD_57555         | metal      | metal     |
| Al2Ce1.ICSD_606350        | metal      | metal     |
| Al2Ce3I2.ICSD_409723      | metal      | metal     |
| Al2Cl10N2P2.ICSD_391165   | insulator  | insulator |
| Al2Cl1F25Sr10.ICSD_202936 | insulator  | insulator |
| Al2Cl1H6Li1O6.ICSD_83509  | insulator  | insulator |
| Al2Cl2O5Sr3.ICSD_68365    | insulator  | insulator |
| Al2Cl6O1Sn1.ICSD_411777   | insulator  | insulator |
| Al2Cl8Co1.ICSD_22143      | insulator  | insulator |
| Al2Cl8Cu1.ICSD_80107      | insulator  | insulator |
| Al2Cl8Mg1.ICSD_62046      | insulator  | insulator |
| Al2Cl8Ni1.ICSD_417872     | insulator  | insulator |
| Al2Cl8Pd1.ICSD_15595      | insulator  | insulator |
| Al2Cl8Te4.ICSD_10322      | insulator  | insulator |
| Al2Cl8Ti1.ICSD_35154      | metal      | insulator |
| Al2Cl8Ti1.ICSD_39565      | insulator  | insulator |
| Al2Cl8V1.ICSD_415951      | insulator  | insulator |
| Al2Co1H10Zr6.ICSD_88069   | metal      | metal     |
| Al2Co1O4.ICSD_290133      | insulator  | metal     |
| Al2Co1Y1.ICSD_57645       | metal      | metal     |
| Al2Co1Zr6.ICSD_150575     | metal      | metal     |
| Al2Co3O12Si3.ICSD_27383   | insulator  | insulator |
| Al2Cs2O7Sb2.ICSD_154361   | insulator  | insulator |
| Al2Cs2O9P2.ICSD_280275    | insulator  | insulator |
| Al2Cs6Te6.ICSD_300181     | insulator  | insulator |
| Al2Cu1Ir1.ICSD_167666     | metal      | metal     |
| Al2Cu1Mg1.ICSD_415062     | metal      | metal     |
| Al2Cu1O4.ICSD_24491       | metal      | metal     |
| Al2Cu1U1.ICSD_23257       | metal      | metal     |
| Al2Cu1Yb1.ICSD_604213     | metal      | metal     |
| Al2Cu1.ICSD_151384        | metal      | metal     |
| Al2Cu1.ICSD_172800        | metal      | metal     |
| Al2Cu9Nd1.ICSD_607036     | metal      | metal     |
| Al2Dy1Ni1.ICSD_57759      | metal      | metal     |

Supplementary Table 48. Five-fold cross validated predictions for the metal/insulator classification (40/598).

| system                    | calculated | predicted |
|---------------------------|------------|-----------|
| Al2Dy1Si2.ICSD.89553      | metal      | metal     |
| Al2Dy1.ICSD.607229        | metal      | metal     |
| Al2Dy3H9Ni6.ICSD.657447   | metal      | metal     |
| Al2Dy3Ni6.ICSD.607315     | metal      | metal     |
| Al2Dy3.ICSD.150549        | metal      | metal     |
| Al2Er1Ge2.ICSD.160311     | metal      | metal     |
| Al2Er1Ni1.ICSD.57778      | metal      | metal     |
| Al2Er1.ICSD.607354        | metal      | metal     |
| Al2Er3H7Ni6.ICSD.657449   | metal      | metal     |
| Al2Er3Ni6.ICSD.607416     | metal      | metal     |
| Al2Er3.ICSD.607352        | metal      | metal     |
| Al2Eu1Ge2.ICSD.607458     | metal      | metal     |
| Al2Eu1S4.ICSD.607464      | insulator  | insulator |
| Al2Eu1Se4.ICSD.607466     | insulator  | insulator |
| Al2Eu1Si2.ICSD.411055     | metal      | metal     |
| Al2Eu1Si2.ICSD.67353      | metal      | metal     |
| Al2Eu1.ICSD.659102        | metal      | metal     |
| Al2Eu2O7Sr1.ICSD.182157   | metal      | insulator |
| Al2F12Li3Na3.ICSD.31110   | insulator  | insulator |
| Al2F16Sr5.ICSD.411613     | insulator  | insulator |
| Al2F1K4Nb11O20.ICSD.65738 | insulator  | insulator |
| Al2F2Ge1O4.ICSD.409714    | insulator  | insulator |
| Al2F2K2O3.ICSD.421736     | insulator  | insulator |
| Al2Fe1O4.ICSD.187920      | metal      | insulator |
| Al2Fe1S4.ICSD.607619      | insulator  | metal     |
| Al2Fe1Zr6.ICSD.402701     | metal      | metal     |
| Al2Fe3O12Si3.ICSD.80671   | insulator  | insulator |
| Al2Fe3Si3.ICSD.422342     | metal      | metal     |
| Al2Fe3Si4.ICSD.83665      | metal      | metal     |
| Al2Ga2La1.ICSD.607781     | metal      | metal     |
| Al2Ga2Pr1.ICSD.607795     | metal      | metal     |
| Al2Ga2Yb1.ICSD.607817     | metal      | metal     |
| Al2Gd1Ni1.ICSD.607899     | metal      | metal     |
| Al2Gd1Si2.ICSD.41180      | metal      | metal     |
| Al2Gd1.ICSD.607852        | metal      | metal     |
| Al2Gd2O7Sr1.ICSD.33580    | insulator  | insulator |
| Al2Ge1H2O6.ICSD.78792     | insulator  | insulator |
| Al2Ge2La1.ICSD.604133     | metal      | metal     |
| Al2Ge2Lu1.ICSD.412125     | metal      | metal     |
| Al2Ge2Nd1.ICSD.412121     | metal      | metal     |
| Al2Ge2O7.ICSD.201750      | insulator  | insulator |
| Al2Ge2Sr1.ICSD.608014     | metal      | metal     |
| Al2Ge2Sr3.ICSD.52617      | metal      | metal     |
| Al2Ge2Tb1.ICSD.412124     | metal      | metal     |
| Al2Ge2Y1.ICSD.39053       | metal      | metal     |
| Al2Ge2Yb1.ICSD.411056     | metal      | metal     |
| Al2Ge4Sr3.ICSD.417968     | metal      | metal     |
| Al2Ge8Sc11.ICSD.76361     | metal      | metal     |
| Al2H10Ni1Zr6.ICSD.88070   | metal      | metal     |
| Al2H12O12Sr3.ICSD.20529   | insulator  | insulator |

Supplementary Table 49. Five-fold cross validated predictions for the metal/insulator classification (41/598).

| system                     | calculated | predicted |
|----------------------------|------------|-----------|
| Al2H12O15Se3.ICSD.72871    | insulator  | insulator |
| Al2H3O9P3.ICSD.74527       | insulator  | insulator |
| Al2H4K1Ni1O14P3.ICSD.75347 | insulator  | insulator |
| Al2H4Li2O14Si4.ICSD.88917  | insulator  | insulator |
| Al2H4Na2O12Si3.ICSD.31309  | insulator  | insulator |
| Al2H4O9Si2.ICSD.30996      | insulator  | insulator |
| Al2H4O9Si2.ICSD.63192      | insulator  | insulator |
| Al2H4O9Si2.ICSD.80083      | insulator  | insulator |
| Al2H4O9Si2.ICSD.87771      | insulator  | insulator |
| Al2H4O9Si2.ICSD.98133      | insulator  | insulator |
| Al2H8Mg1.ICSD.152538       | insulator  | insulator |
| Al2H9Ni6Y3.ICSD.657444     | metal      | metal     |
| Al2Hf1.ICSD.608069         | metal      | metal     |
| Al2Hf3.ICSD.60632          | metal      | metal     |
| Al2Hf6Pt1.ICSD.261007      | metal      | metal     |
| Al2Hg1S4.ICSD.25635        | insulator  | insulator |
| Al2Hg1S4.ICSD.608160       | insulator  | insulator |
| Al2Hg1Se4.ICSD.25638       | insulator  | insulator |
| Al2Hg1Se4.ICSD.608163      | insulator  | insulator |
| Al2Hg1Te4.ICSD.25641       | insulator  | insulator |
| Al2Ho1Ni1.ICSD.57919       | metal      | metal     |
| Al2Ho1.ICSD.608178         | metal      | metal     |
| Al2Ho3Ni6.ICSD.105154      | metal      | metal     |
| Al2Ho3.ICSD.184632         | metal      | metal     |
| Al2I12Sb2.ICSD.38253       | insulator  | insulator |
| Al2I1La2.ICSD.411690       | metal      | metal     |
| Al2I2La3.ICSD.411691       | metal      | metal     |
| Al2Ir1Li1.ICSD.105155      | metal      | metal     |
| Al2K2O24P8.ICSD.260827     | insulator  | insulator |
| Al2K2O7Sb2.ICSD.280310     | insulator  | insulator |
| Al2K6O6.ICSD.74968         | insulator  | insulator |
| Al2K6Se6.ICSD.300172       | insulator  | insulator |
| Al2K6Te6.ICSD.300168       | insulator  | insulator |
| Al2La1Zn2.ICSD.105503      | metal      | metal     |
| Al2La1.ICSD.604450         | metal      | metal     |
| Al2La5Ru3.ICSD.167948      | metal      | metal     |
| Al2Li1Pd1.ICSD.105505      | metal      | metal     |
| Al2Li1Pt1.ICSD.105507      | metal      | metal     |
| Al2Li1Rh1.ICSD.105509      | metal      | metal     |
| Al2Li3.ICSD.57951          | metal      | metal     |
| Al2Lu1.ICSD.608370         | metal      | metal     |
| Al2Lu3.ICSD.57959          | metal      | metal     |
| Al2Mg1O4.ICSD.161057       | insulator  | insulator |
| Al2Mg1O4.ICSD.182859       | insulator  | insulator |
| Al2Mg1S4.ICSD.107308       | insulator  | insulator |
| Al2Mg1S4.ICSD.79672        | insulator  | insulator |
| Al2Mg1Se4.ICSD.83363       | insulator  | insulator |
| Al2Mg1Si2.ICSD.156101      | metal      | metal     |
| Al2Mg2Se5.ICSD.41928       | insulator  | insulator |
| Al2Mg3O12Si3.ICSD.24941    | insulator  | insulator |

Supplementary Table 50. Five-fold cross validated predictions for the metal/insulator classification (42/598).

| system                    | calculated | predicted |
|---------------------------|------------|-----------|
| Al2Mn1S4.ICSD.608507      | metal      | insulator |
| Al2Mn1S4.ICSD.608509      | insulator  | insulator |
| Al2Mn1Te4.ICSD.608538     | insulator  | insulator |
| Al2Mn3O12Si3.ICSD.52396   | insulator  | insulator |
| Al2N1Nb3.ICSD.60644       | metal      | metal     |
| Al2N1Ni1Ti3.ICSD.91338    | metal      | metal     |
| Al2N2O3Si1Sr1.ICSD.408170 | insulator  | insulator |
| Al2N4Sr3.ICSD.74824       | insulator  | insulator |
| Al2Na6Se6.ICSD.300166     | insulator  | insulator |
| Al2Na6Te6.ICSD.300163     | insulator  | insulator |
| Al2Na7Sb5.ICSD.48168      | insulator  | insulator |
| Al2Nd1.ICSD.58027         | metal      | metal     |
| Al2Ni1O1Ti3.ICSD.91339    | metal      | metal     |
| Al2Ni1O4.ICSD.608815      | metal      | insulator |
| Al2Ni1Sc1.ICSD.370012     | metal      | metal     |
| Al2Ni1Tb1.ICSD.608885     | metal      | metal     |
| Al2Ni1Tm1.ICSD.58067      | metal      | metal     |
| Al2Ni1Tm1.ICSD.608918     | metal      | metal     |
| Al2Ni1Y1.ICSD.160930      | metal      | metal     |
| Al2Ni1Yb1.ICSD.370014     | metal      | metal     |
| Al2Ni1Zr6.ICSD.160911     | metal      | metal     |
| Al2Ni3Pr1.ICSD.107864     | metal      | metal     |
| Al2Ni6Tb3.ICSD.608878     | metal      | metal     |
| Al2Ni6Y3.ICSD.160937      | metal      | metal     |
| Al2O10Rb2Si3.ICSD.180324  | insulator  | insulator |
| Al2O12P3Rb3.ICSD.280211   | insulator  | insulator |
| Al2O12P3Ti3.ICSD.280212   | insulator  | insulator |
| Al2O12S3.ICSD.73249       | insulator  | insulator |
| Al2O12Si3Sr3.ICSD.27385   | insulator  | insulator |
| Al2O12W3.ICSD.73878       | insulator  | insulator |
| Al2O12W3.ICSD.73879       | insulator  | insulator |
| Al2O15Ti7.ICSD.202646     | metal      | insulator |
| Al2O1.ICSD.28919          | metal      | insulator |
| Al2O3.ICSD.161061         | insulator  | insulator |
| Al2O3.ICSD.161062         | insulator  | insulator |
| Al2O3.ICSD.169722         | insulator  | insulator |
| Al2O3.ICSD.173014         | insulator  | insulator |
| Al2O3.ICSD.30026          | insulator  | insulator |
| Al2O3.ICSD.82504          | insulator  | insulator |
| Al2O3.ICSD.84375          | insulator  | insulator |
| Al2O4Pb1.ICSD.33532       | insulator  | insulator |
| Al2O4Sr1.ICSD.160296      | insulator  | insulator |
| Al2O4Sr1.ICSD.160298      | insulator  | insulator |
| Al2O4Zn1.ICSD.94159       | insulator  | insulator |
| Al2O5Si1.ICSD.76936       | insulator  | insulator |
| Al2O5Si1.ICSD.85742       | insulator  | insulator |
| Al2O5Si1.ICSD.85745       | insulator  | insulator |
| Al2O5Si1.ICSD.85746       | insulator  | insulator |
| Al2O5Ti1.ICSD.27681       | insulator  | insulator |
| Al2O6Rb6.ICSD.74969       | insulator  | insulator |

Supplementary Table 51. Five-fold cross validated predictions for the metal/insulator classification (43/598).

| system                  | calculated | predicted |
|-------------------------|------------|-----------|
| Al2O7Rb2Sb2.ICSD.154360 | insulator  | insulator |
| Al2O9Pb2Si2.ICSD.159977 | insulator  | insulator |
| Al2O9Tb4.ICSD.164882    | insulator  | insulator |
| Al2O9Y4.ICSD.51076      | insulator  | insulator |
| Al2Os1.ICSD.58108       | insulator  | metal     |
| Al2P4Sr3.ICSD.409134    | insulator  | insulator |
| Al2Pb1S4.ICSD.609026    | insulator  | insulator |
| Al2Pb2Sr1.ICSD.25336    | metal      | metal     |
| Al2Pd1Yb1.ICSD.658148   | metal      | metal     |
| Al2Pd1.ICSD.58116       | metal      | metal     |
| Al2Pd5Pu1.ICSD.166270   | metal      | metal     |
| Al2Pd5U1.ICSD.161313    | metal      | metal     |
| Al2Pd5Y1.ICSD.182836    | metal      | metal     |
| Al2Pr1Si2.ICSD.152800   | metal      | metal     |
| Al2Pr1Zn2.ICSD.106244   | metal      | metal     |
| Al2Pr1.ICSD.609072      | metal      | metal     |
| Al2Pr1.ICSD.609080      | metal      | metal     |
| Al2Pt1.ICSD.609121      | metal      | metal     |
| Al2Pu1.ICSD.58140       | metal      | metal     |
| Al2Ru1.ICSD.58156       | insulator  | metal     |
| Al2Ru1.ICSD.609228      | metal      | metal     |
| Al2Ru1.ICSD.609234      | insulator  | metal     |
| Al2S3.ICSD.609250       | insulator  | insulator |
| Al2S3.ICSD.73220        | insulator  | insulator |
| Al2S4Sr1.ICSD.609259    | insulator  | insulator |
| Al2S4Zn1.ICSD.609280    | insulator  | insulator |
| Al2S4Zn1.ICSD.76278     | insulator  | insulator |
| Al2Sb6Sr5.ICSD.62304    | insulator  | insulator |
| Al2Sb6Yb5.ICSD.409996   | metal      | metal     |
| Al2Sc1.ICSD.609301      | metal      | metal     |
| Al2Se3.ICSD.14373       | insulator  | insulator |
| Al2Se4Sr1.ICSD.49732    | insulator  | insulator |
| Al2Se4Zn1.ICSD.25636    | insulator  | insulator |
| Al2Se4Zn1.ICSD.609325   | insulator  | insulator |
| Al2Si2Sm1.ICSD.89551    | metal      | metal     |
| Al2Si2Sr1.ICSD.419886   | metal      | metal     |
| Al2Si2Sr3.ICSD.100127   | metal      | metal     |
| Al2Si2Tb1.ICSD.89552    | metal      | metal     |
| Al2Si2Y1.ICSD.89550     | metal      | metal     |
| Al2Si2Yb1.ICSD.411054   | metal      | metal     |
| Al2Sm1Zn2.ICSD.609398   | metal      | metal     |
| Al2Sm1.ICSD.609382      | metal      | metal     |
| Al2Sr1.ICSD.181800      | metal      | metal     |
| Al2Sr1.ICSD.58166       | metal      | metal     |
| Al2Sr3.ICSD.609416      | metal      | metal     |
| Al2Tb1.ICSD.609469      | metal      | metal     |
| Al2Tb3.ICSD.609454      | metal      | metal     |
| Al2Te3.ICSD.406353      | insulator  | insulator |
| Al2Te4Zn1.ICSD.25639    | insulator  | insulator |
| Al2Te5.ICSD.78941       | insulator  | insulator |

Supplementary Table 52. Five-fold cross validated predictions for the metal/insulator classification (44/598).

| system                   | calculated | predicted |
|--------------------------|------------|-----------|
| Al2Th1.ICSD_58181        | metal      | metal     |
| Al2Th1.ICSD_58182        | metal      | metal     |
| Al2Th3.ICSD_58183        | metal      | metal     |
| Al2Ti1.ICSD_106252       | metal      | metal     |
| Al2Tm1.ICSD_609563       | metal      | metal     |
| Al2U1.ICSD_106979        | metal      | metal     |
| Al2U1.ICSD_609586        | metal      | metal     |
| Al2W1.ICSD_173662        | metal      | metal     |
| Al2Y1.ICSD_609656        | metal      | metal     |
| Al2Y3.ICSD_247100        | metal      | metal     |
| Al2Yb1.ICSD_609677       | metal      | metal     |
| Al2Zr1.ICSD_609730       | metal      | metal     |
| Al2Zr3.ICSD_58231        | metal      | metal     |
| Al30Mg23.ICSD_57965      | metal      | metal     |
| Al3Au1Ce1.ICSD_658144    | metal      | metal     |
| Al3Au8.ICSD_57502        | metal      | metal     |
| Al3B2Ru4.ICSD_43844      | metal      | metal     |
| Al3B4Gd1O12.ICSD_100831  | insulator  | insulator |
| Al3B4Nd1O12.ICSD_20800   | insulator  | insulator |
| Al3B4Nd1O12.ICSD_6175    | insulator  | insulator |
| Al3B4O12Pr1.ICSD_160892  | insulator  | insulator |
| Al3B4O12Y1.ICSD_20223    | insulator  | insulator |
| Al3B6Co20.ICSD_43833     | metal      | metal     |
| Al3B6Ni20.ICSD_408417    | metal      | metal     |
| Al3Ba10Ge7.ICSD_1078     | metal      | metal     |
| Al3Bi5Cl12.ICSD_201993   | insulator  | insulator |
| Al3Br12La1.ICSD_72281    | insulator  | insulator |
| Al3Br12Pr1.ICSD_72282    | insulator  | insulator |
| Al3C1Zr5.ICSD_606294     | metal      | metal     |
| Al3C2O5Sc3.ICSD_420953   | insulator  | insulator |
| Al3C3Co1W9.ICSD_421253   | metal      | metal     |
| Al3C3Dy1.ICSD_606190     | metal      | metal     |
| Al3C3Er1.ICSD_606194     | metal      | metal     |
| Al3C3Gd1.ICSD_606207     | metal      | metal     |
| Al3C3Ho1.ICSD_606218     | metal      | metal     |
| Al3C3Sc1.ICSD_43477      | insulator  | insulator |
| Al3C3Sc1.ICSD_62308      | insulator  | insulator |
| Al3C3Tb1.ICSD_606267     | metal      | metal     |
| Al3C3Tm1.ICSD_606281     | insulator  | metal     |
| Al3C3U1.ICSD_43478       | metal      | metal     |
| Al3C3Y1.ICSD_606289      | metal      | metal     |
| Al3C4Hf2.ICSD_161588     | metal      | metal     |
| Al3C4U2.ICSD_66750       | metal      | metal     |
| Al3C4Zr2.ICSD_153859     | metal      | metal     |
| Al3C5Hf3.ICSD_161587     | metal      | metal     |
| Al3C5Zr2.ICSD_87349      | metal      | metal     |
| Al3C5Zr3.ICSD_159412     | metal      | metal     |
| Al3C6Zr4.ICSD_159413     | metal      | metal     |
| Al3Ca2H1O13Si3.ICSD_9245 | insulator  | insulator |
| Al3Ca4Mg1.ICSD_152756    | metal      | metal     |

Supplementary Table 53. Five-fold cross validated predictions for the metal/insulator classification (45/598).

| system                    | calculated | predicted |
|---------------------------|------------|-----------|
| Al3Ca8.ICSD_165240        | metal      | metal     |
| Al3Ce1Ni2.ICSD_602476     | metal      | metal     |
| Al3Ce1Pd2.ICSD_603064     | metal      | metal     |
| Al3Ce1.ICSD_150603        | metal      | metal     |
| Al3Ce2Ge4.ICSD_50977      | metal      | metal     |
| Al3Cl12Tb1.ICSD_410939    | insulator  | insulator |
| Al3Co14Ho2.ICSD_606594    | metal      | metal     |
| Al3Co14Y2.ICSD_606723     | metal      | metal     |
| Al3Co1Er2.ICSD_606559     | metal      | metal     |
| Al3Cs2F12Na1.ICSD_646     | insulator  | insulator |
| Al3Cu1Gd1.ICSD_658383     | metal      | metal     |
| Al3Cu1Nd1.ICSD_290391     | metal      | metal     |
| Al3Cu1Pr1.ICSD_290390     | metal      | metal     |
| Al3Cu2Gd1.ICSD_57681      | metal      | metal     |
| Al3Cu2Ni3Zr12.ICSD_166652 | insulator  | metal     |
| Al3Cu2.ICSD_57668         | metal      | metal     |
| Al3Dy1.ICSD_57738         | metal      | metal     |
| Al3Dy1.ICSD_57739         | metal      | metal     |
| Al3Dy1.ICSD_607239        | metal      | metal     |
| Al3Dy2Ge4.ICSD_607305     | metal      | metal     |
| Al3Dy2Si2.ICSD_92449      | metal      | metal     |
| Al3Er0.8Y0.2.ICSD_607439  | metal      | metal     |
| Al3Er1Ni2.ICSD_55529      | metal      | metal     |
| Al3Er1.ICSD_607353        | metal      | metal     |
| Al3Er2Si2.ICSD_415148     | metal      | metal     |
| Al3Er3Ge2Ni1.ICSD_171194  | metal      | metal     |
| Al3Er5Ge4Ni3.ICSD_172068  | metal      | metal     |
| Al3F12K2Na1.ICSD_40178    | insulator  | insulator |
| Al3F12Na1Rb2.ICSD_40177   | insulator  | insulator |
| Al3F14Na5.ICSD_26419      | insulator  | insulator |
| Al3F19Pb5.ICSD_203224     | insulator  | insulator |
| Al3Fe1Si2.ICSD_79710      | metal      | metal     |
| Al3Fe2Si1.ICSD_422341     | metal      | metal     |
| Al3Gd1O8Pb2.ICSD_404479   | insulator  | insulator |
| Al3Gd1Pd2.ICSD_105145     | metal      | metal     |
| Al3Gd1.ICSD_607838        | metal      | metal     |
| Al3Ge2Ni1Y3.ICSD_76297    | metal      | metal     |
| Al3Ge4La2.ICSD_76359      | metal      | metal     |
| Al3H14Na5.ICSD_246195     | insulator  | insulator |
| Al3H6K1O14S2.ICSD_12106   | metal      | insulator |
| Al3H6K1O14S2.ICSD_18141   | insulator  | insulator |
| Al3Hf1.ICSD_57896         | metal      | metal     |
| Al3Hf1.ICSD_608082        | metal      | metal     |
| Al3Hf2.ICSD_109105        | metal      | metal     |
| Al3Hf4.ICSD_608091        | metal      | metal     |
| Al3Hf5N1.ICSD_603995      | metal      | metal     |
| Al3Hf5.ICSD_57898         | metal      | metal     |
| Al3Ho1O8Pb2.ICSD_67819    | insulator  | insulator |
| Al3Ho1.ICSD_57913         | metal      | metal     |
| Al3Ho1.ICSD_57914         | metal      | metal     |

Supplementary Table 54. Five-fold cross validated predictions for the metal/insulator classification (46/598).

| system                 | calculated | predicted |
|------------------------|------------|-----------|
| Al3Ho2Si2_ICSD_415147  | metal      | metal     |
| Al3I1Te3_ICSD_66030    | insulator  | insulator |
| Al3Ir1_ICSD_608235     | metal      | metal     |
| Al3Ir1_ICSD_608237     | metal      | metal     |
| Al3La1Pd2_ICSD_105500  | metal      | metal     |
| Al3La1_ICSD_659413     | metal      | metal     |
| Al3La5Ni2_ICSD_415701  | metal      | metal     |
| Al3Li12Si4_ICSD_39597  | metal      | metal     |
| Al3Li1_ICSD_57952      | metal      | metal     |
| Al3Li8Si5_ICSD_51446   | metal      | metal     |
| Al3Lu1O8Pb2_ICSD_67820 | insulator  | insulator |
| Al3Lu1_ICSD_608373     | metal      | metal     |
| Al3Mo1_ICSD_105517     | insulator  | metal     |
| Al3Nb1_ICSD_186000     | metal      | metal     |
| Al3Nd1Ni2_ICSD_58034   | metal      | metal     |
| Al3Nd1Pd2_ICSD_150136  | metal      | metal     |
| Al3Nd1_ICSD_58028      | metal      | metal     |
| Al3Nd1_ICSD_658317     | metal      | metal     |
| Al3Ni1Y1_ICSD_160939   | metal      | metal     |
| Al3Ni1_ICSD_608787     | metal      | metal     |
| Al3Ni2Pr1_ICSD_58045   | metal      | metal     |
| Al3Ni2Th1_ICSD_58061   | metal      | metal     |
| Al3Ni2U1_ICSD_659220   | metal      | metal     |
| Al3Ni2Y1_ICSD_160934   | metal      | metal     |
| Al3Ni2_ICSD_608786     | metal      | metal     |
| Al3Ni5_ICSD_58041      | metal      | metal     |
| Al3O12Sc2Y3_ICSD_67055 | insulator  | insulator |
| Al3O27P9_ICSD_409479   | insulator  | insulator |
| Al3Os1U2_ICSD_58111    | metal      | metal     |
| Al3Os2_ICSD_58109      | metal      | metal     |
| Al3Pd2Sm1_ICSD_105540  | metal      | metal     |
| Al3Pd2U1_ICSD_657574   | metal      | metal     |
| Al3Pd2_ICSD_58117      | metal      | metal     |
| Al3Pd5_ICSD_58118      | metal      | metal     |
| Al3Pr1_ICSD_107867     | metal      | metal     |
| Al3Pr1_ICSD_58126      | metal      | metal     |
| Al3Pr1_ICSD_609096     | metal      | metal     |
| Al3Pt2_ICSD_58134      | metal      | metal     |
| Al3Pt2_ICSD_602213     | metal      | metal     |
| Al3Pt5_ICSD_656681     | metal      | metal     |
| Al3Pu1_ICSD_58141      | metal      | metal     |
| Al3Pu1_ICSD_58142      | metal      | metal     |
| Al3Pu1_ICSD_58143      | metal      | metal     |
| Al3Pu1_ICSD_609172     | metal      | metal     |
| Al3Pu1_ICSD_609187     | metal      | metal     |
| Al3Pu1_ICSD_609188     | metal      | metal     |
| Al3Ru1Sc2_ICSD_58159   | metal      | metal     |
| Al3Ru1_ICSD_609233     | metal      | metal     |
| Al3Ru2_ICSD_609226     | metal      | metal     |
| Al3Ru2_ICSD_609232     | metal      | metal     |

Supplementary Table 55. Five-fold cross validated predictions for the metal/insulator classification (47/598).

| system                     | calculated | predicted |
|----------------------------|------------|-----------|
| Al3Sc1_ICSD_247449         | metal      | metal     |
| Al3Sc1_ICSD_609305         | metal      | metal     |
| Al3Si2Tb2_ICSD_415146      | metal      | metal     |
| Al3Si2Tm2_ICSD_415150      | metal      | metal     |
| Al3Si2Y2_ICSD_75228        | metal      | metal     |
| Al3Ta1_ICSD_609440         | metal      | metal     |
| Al3Ta5_ICSD_609439         | metal      | metal     |
| Al3Tb0.8Zr0.2_ICSD_609475  | metal      | metal     |
| Al3Tb1_ICSD_58175          | metal      | metal     |
| Al3Tc2_ICSD_609482         | metal      | metal     |
| Al3Th1_ICSD_609500         | metal      | metal     |
| Al3Ti1_ICSD_167814         | metal      | metal     |
| Al3Ti1_ICSD_609543         | metal      | metal     |
| Al3Tm1_ICSD_58194          | metal      | metal     |
| Al3U1_ICSD_658006          | metal      | metal     |
| Al3V1_ICSD_167811          | metal      | metal     |
| Al3V1_ICSD_167812          | metal      | metal     |
| Al3Y1_ICSD_58216           | metal      | metal     |
| Al3Y1_ICSD_58218           | metal      | metal     |
| Al3Y1_ICSD_58220           | metal      | metal     |
| Al3Y5_ICSD_603810          | metal      | metal     |
| Al3Yb1_ICSD_658320         | metal      | metal     |
| Al3Zr1_ICSD_609709         | metal      | metal     |
| Al3Zr1_ICSD_609737         | metal      | metal     |
| Al3Zr2_ICSD_609705         | metal      | metal     |
| Al3Zr4_ICSD_150529         | metal      | metal     |
| Al3Zr5_ICSD_58235          | metal      | metal     |
| Al3Zr5_ICSD_603491         | metal      | metal     |
| Al40Ba21_ICSD_170238       | metal      | metal     |
| Al43Dy6Ti4_ICSD_150119     | metal      | metal     |
| Al45Cr7_ICSD_57652         | metal      | metal     |
| Al45V7_ICSD_58204          | metal      | metal     |
| Al4As8K12_ICSD_300121      | insulator  | insulator |
| Al4Au1Er1Ge2_ICSD_415290   | metal      | metal     |
| Al4B12Be4Cs1O28_ICSD_17018 | metal      | insulator |
| Al4B2Co1O10_ICSD_1975      | insulator  | insulator |
| Al4Ba1S7_ICSD_33237        | insulator  | insulator |
| Al4Ba1_ICSD_57513          | metal      | metal     |
| Al4Ba7Ge9_ICSD_417660      | metal      | metal     |
| Al4Be1Mg1O8_ICSD_36361     | insulator  | insulator |
| Al4Bi2O9_ICSD_26807        | insulator  | insulator |
| Al4Bi2S8_ICSD_408439       | insulator  | insulator |
| Al4Bi2Se8_ICSD_408440      | insulator  | insulator |
| Al4Bi4Cl16S4_ICSD_414154   | insulator  | insulator |
| Al4Bi4Cl16Se4_ICSD_414155  | insulator  | insulator |
| Al4Bi4Cl16Te4_ICSD_411714  | insulator  | insulator |
| Al4C1N3O1_ICSD_409682      | insulator  | insulator |
| Al4C1O4_ICSD_18204         | insulator  | insulator |
| Al4C3_ICSD_606173          | insulator  | metal     |
| Al4C4Si1_ICSD_606255       | metal      | insulator |

Supplementary Table 56. Five-fold cross validated predictions for the metal/insulator classification (48/598).

| system                      | calculated | predicted |
|-----------------------------|------------|-----------|
| A14C4Th1.ICSD_81573         | metal      | metal     |
| A14C5Hf2.ICSD_161586        | metal      | metal     |
| A14C5Zr2.ICSD_173676        | metal      | metal     |
| A14C6Hf3.ICSD_161585        | metal      | metal     |
| A14C6Zr3.ICSD_173677        | metal      | metal     |
| A14Ca1H2O12Si2.ICSD_34855   | insulator  | insulator |
| A14Ca1O7.ICSD_16191         | insulator  | insulator |
| A14Ca1.ICSD_151189          | metal      | metal     |
| A14Ce1Co1.ICSD_55598        | metal      | metal     |
| A14Ce1Ni1.ICSD_606496       | metal      | metal     |
| A14Ce1.ICSD_606379          | metal      | metal     |
| A14Ce3Si6.ICSD_82675        | metal      | metal     |
| A14Cl14Te4.ICSD_10323       | insulator  | insulator |
| A14Co1La1.ICSD_9986         | metal      | metal     |
| A14Co1Nd1.ICSD_154678       | metal      | metal     |
| A14Co1Pr1.ICSD_600912       | metal      | metal     |
| A14Co1U1.ICSD_240136        | metal      | metal     |
| A14Cu2O7.ICSD_100355        | metal      | metal     |
| A14Cu9.ICSD_606890          | metal      | metal     |
| A14Dy1Ni1.ICSD_607321       | metal      | metal     |
| A14Er1Mo2.ICSD_607414       | metal      | metal     |
| A14Er1Ni1.ICSD_57779        | metal      | metal     |
| A14Eu1.ICSD_425968          | metal      | metal     |
| A14Eu1.ICSD_55427           | metal      | metal     |
| A14Eu1.ICSD_607445          | metal      | metal     |
| A14Eu1.ICSD_607452          | metal      | metal     |
| A14F9K3O8P2.ICSD_79700      | insulator  | insulator |
| A14Fe8U1.ICSD_607702        | metal      | metal     |
| A14Gd1Mo2.ICSD_607888       | metal      | metal     |
| A14Ge2Ni1Tb2.ICSD_95799     | metal      | metal     |
| A14H1O14Ta3.ICSD_67673      | insulator  | insulator |
| A14H3O15P3.ICSD_6193        | insulator  | insulator |
| A14H6O18P6.ICSD_415615      | insulator  | insulator |
| A14Ho1Ni1.ICSD_57920        | metal      | metal     |
| A14In3Sr11.ICSD_159149      | metal      | metal     |
| A14K12P8.ICSD_300130        | insulator  | insulator |
| A14La17N33Si9.ICSD_416358   | insulator  | insulator |
| A14La1.ICSD_57935           | metal      | metal     |
| A14La1.ICSD_57936           | metal      | metal     |
| A14Li9.ICSD_57953           | metal      | metal     |
| A14Mg2O18Si5.ICSD_86347     | insulator  | insulator |
| A14Mg2Zn3.ICSD_180365       | metal      | metal     |
| A14Mn13O28Sb2Si2.ICSD_12137 | insulator  | insulator |
| A14Mo1.ICSD_58000           | metal      | metal     |
| A14Mo2Yb1.ICSD_660236       | metal      | metal     |
| A14Na4P12Sr8.ICSD_409319    | insulator  | insulator |
| A14Nd1.ICSD_608758          | metal      | metal     |
| A14Ni1Tb1.ICSD_58060        | metal      | metal     |
| A14Ni1Tm1.ICSD_58068        | metal      | metal     |
| A14Ni1Y1.ICSD_58077         | metal      | metal     |

Supplementary Table 57. Five-fold cross validated predictions for the metal/insulator classification (49/598).

| system                   | calculated | predicted |
|--------------------------|------------|-----------|
| A14Ni3.ICSD_58042        | metal      | metal     |
| A14O15Sr6Y2.ICSD_262993  | insulator  | insulator |
| A14O1Si6Sr10.ICSD_418387 | metal      | metal     |
| A14O7Sr1.ICSD_16751      | insulator  | insulator |
| A14O7Sr1.ICSD_34803      | insulator  | insulator |
| A14Pr1.ICSD_150507       | metal      | metal     |
| A14Pr1.ICSD_609088       | metal      | metal     |
| A14Pr3Si6.ICSD_152801    | metal      | metal     |
| A14Pu1.ICSD_150593       | metal      | metal     |
| A14Sm1.ICSD_609378       | metal      | metal     |
| A14Sm1.ICSD_609392       | metal      | metal     |
| A14Sn3Sr11.ICSD_159165   | metal      | metal     |
| A14Sr1.ICSD_609418       | metal      | metal     |
| A14Tb1.ICSD_609456       | metal      | metal     |
| A14Tc1.ICSD_609483       | metal      | metal     |
| A14U1.ICSD_150933        | metal      | metal     |
| A14W1.ICSD_58205         | metal      | metal     |
| A14Zr5.ICSD_167476       | metal      | metal     |
| Al5.15Mg3.15.ICSD_150646 | metal      | metal     |
| Al57Mn12.ICSD_14374      | metal      | metal     |
| Al5B1O9.ICSD_167310      | insulator  | insulator |
| Al5Ba3.ICSD_420090       | metal      | metal     |
| Al5Ba4.ICSD_1985         | metal      | metal     |
| Al5Ba5Pb1.ICSD_416337    | metal      | metal     |
| Al5Ba5Sn1.ICSD_416338    | metal      | metal     |
| Al5Br2La4.ICSD_413191    | metal      | metal     |
| Al5C3N1.ICSD_14398       | insulator  | insulator |
| Al5C3N1.ICSD_36303       | insulator  | insulator |
| Al5Ce1Ni2.ICSD_104630    | metal      | metal     |
| Al5Ce1Pt3.ICSD_171199    | metal      | metal     |
| Al5Co2.ICSD_30207        | metal      | metal     |
| Al5Cu6Mg2.ICSD_57694     | metal      | metal     |
| Al5Cu6U1.ICSD_188588     | metal      | metal     |
| Al5Dy2Fe12.ICSD_604298   | metal      | metal     |
| Al5Er3O12.ICSD_170147    | insulator  | insulator |
| Al5Eu3O12.ICSD_245326    | insulator  | insulator |
| Al5Gd3O12.ICSD_23849     | insulator  | insulator |
| Al5Ge8Yb7.ICSD_76360     | metal      | metal     |
| Al5Ho3O12.ICSD_33603     | insulator  | insulator |
| Al5La1Ni2.ICSD_608306    | metal      | metal     |
| Al5Lu3O12.ICSD_182354    | insulator  | insulator |
| Al5Lu3O12.ICSD_23846     | insulator  | insulator |
| Al5Mo1.ICSD_105519       | metal      | metal     |
| Al5Mo1.ICSD_105520       | metal      | metal     |
| Al5Mo1.ICSD_105521       | metal      | metal     |
| Al5Na1O12Ti2.ICSD_15346  | insulator  | insulator |
| Al5Ni2Pr1.ICSD_58046     | metal      | metal     |
| Al5Ni2Zr1.ICSD_58084     | metal      | metal     |
| Al5O12Tb3.ICSD_33602     | insulator  | insulator |
| Al5O12Y3.ICSD_31496      | insulator  | insulator |

Supplementary Table 58. Five-fold cross validated predictions for the metal/insulator classification (50/598).

| system                      | calculated | predicted |
|-----------------------------|------------|-----------|
| Al5O12Yb3.ICSD_170159       | insulator  | insulator |
| Al5Re24.ICSD_609200         | metal      | metal     |
| Al5Rh2.ICSD_58153           | metal      | metal     |
| Al5W1.ICSD_58206            | metal      | metal     |
| Al6Au1Dy2Si4.ICSD_281661    | metal      | metal     |
| Al6Au1Si4Tb2.ICSD_281659    | metal      | metal     |
| Al6Br2Ge6Li8O24.ICSD_87991  | insulator  | insulator |
| Al6Br2Ge6Na8O24.ICSD_65665  | insulator  | insulator |
| Al6Br2Na8O24Si6.ICSD_417676 | insulator  | insulator |
| Al6C3N2.ICSD_14399          | metal      | insulator |
| Al6Ca10Ge9.ICSD_417966      | metal      | metal     |
| Al6Ca4O13.ICSD_16177        | insulator  | insulator |
| Al6Ca4O13.ICSD_245370       | insulator  | insulator |
| Al6Ca4O16S1.ICSD_28480      | insulator  | insulator |
| Al6Ca4O16W1.ICSD_28481      | insulator  | insulator |
| Al6Ca5O14.ICSD_1714         | insulator  | insulator |
| Al6Cl2Ge6Li8O24.ICSD_87990  | insulator  | insulator |
| Al6Cl2Ge6Na8O24.ICSD_65664  | insulator  | insulator |
| Al6Cl2K8O24Si6.ICSD_41191   | insulator  | insulator |
| Al6Cl2Li8O24Si6.ICSD_41186  | insulator  | insulator |
| Al6Cl2Na8O24Si6.ICSD_29443  | insulator  | insulator |
| Al6Cu1H16O28P4.ICSD_21062   | metal      | insulator |
| Al6Dy2Pt1Si4.ICSD_281660    | metal      | metal     |
| Al6F21Na1Rb2.ICSD_68555     | insulator  | insulator |
| Al6Fe1.ICSD_607497          | metal      | metal     |
| Al6Ge6I2Li8O24.ICSD_87992   | insulator  | insulator |
| Al6Ge6I2Na8O24.ICSD_65666   | insulator  | insulator |
| Al6I2Na8O24Si6.ICSD_68960   | insulator  | insulator |
| Al6Mn1.ICSD_57973           | metal      | metal     |
| Al6Na8O24Si6.ICSD_56710     | metal      | insulator |
| Al6O11Sr2.ICSD_97713        | insulator  | insulator |
| Al6O16S1Sr4.ICSD_28482      | insulator  | insulator |
| Al6O16Sr4W1.ICSD_28483      | insulator  | insulator |
| Al6O1Si8Sr13.ICSD_418388    | metal      | metal     |
| Al6Pt1Si4Tb2.ICSD_281658    | metal      | metal     |
| Al6Re1.ICSD_58149           | metal      | metal     |
| Al6Ru1.ICSD_58157           | metal      | metal     |
| Al6Tc1.ICSD_58177           | metal      | metal     |
| Al7Au3Ce1.ICSD_391101       | metal      | metal     |
| Al7Au3Dy1.ICSD_391108       | metal      | metal     |
| Al7Au3Er1.ICSD_391109       | metal      | metal     |
| Al7Au3Gd1.ICSD_391102       | metal      | metal     |
| Al7Au3Ho1.ICSD_391106       | metal      | metal     |
| Al7Au3Lu1.ICSD_391105       | metal      | metal     |
| Al7Au3Nd1.ICSD_391107       | metal      | metal     |
| Al7Au3Pr1.ICSD_391104       | metal      | metal     |
| Al7Au3Tb1.ICSD_391103       | metal      | metal     |
| Al7Au3Yb1.ICSD_391110       | metal      | metal     |
| Al7C3N3.ICSD_14400          | metal      | insulator |
| Al7Ca3Cu2.ICSD_57538        | metal      | metal     |

Supplementary Table 59. Five-fold cross validated predictions for the metal/insulator classification (51/598).

| system                  | calculated | predicted |
|-------------------------|------------|-----------|
| Al7Co1Cu2.ICSD_57603    | metal      | metal     |
| Al7Cu16Dy6.ICSD_606894  | metal      | metal     |
| Al7Cu16Er6.ICSD_606911  | metal      | metal     |
| Al7Cu16H9Zr6.ICSD_76304 | metal      | metal     |
| Al7Cu16Ho6.ICSD_606961  | metal      | metal     |
| Al7Cu16Yb6.ICSD_607188  | metal      | metal     |
| Al7Cu16Zr6.ICSD_656063  | metal      | metal     |
| Al7Cu2Fe1.ICSD_57677    | metal      | metal     |
| Al7S12Ti3.ICSD_72324    | insulator  | insulator |
| Al7Te10.ICSD_62659      | insulator  | insulator |
| Al7Th2.ICSD_58186       | metal      | metal     |
| Al8Be1Mg3O16.ICSD_31227 | insulator  | insulator |
| Al8C3N4.ICSD_14401      | metal      | insulator |
| Al8Ca1Co2.ICSD_57534    | metal      | metal     |
| Al8Ca1Cu4.ICSD_57539    | metal      | metal     |
| Al8Ca1Fe4.ICSD_606314   | metal      | metal     |
| Al8Ca1Mn4.ICSD_57545    | metal      | metal     |
| Al8Ce1Cr4.ICSD_606419   | metal      | metal     |
| Al8Ce1Cu4.ICSD_57566    | metal      | metal     |
| Al8Ce1Fe4.ICSD_57574    | metal      | metal     |
| Al8Ce1Mn4.ICSD_57579    | metal      | metal     |
| Al8Co2Pr1.ICSD_600914   | metal      | metal     |
| Al8Co2Sm1.ICSD_600915   | metal      | metal     |
| Al8Cr4Dy1.ICSD_606767   | metal      | metal     |
| Al8Cr4Er1.ICSD_606769   | metal      | metal     |
| Al8Cr4Gd1.ICSD_156967   | metal      | metal     |
| Al8Cr4Ho1.ICSD_606790   | metal      | metal     |
| Al8Cr4La1.ICSD_606792   | metal      | metal     |
| Al8Cr4Nd1.ICSD_606817   | metal      | metal     |
| Al8Cr4Pr1.ICSD_606830   | metal      | metal     |
| Al8Cr4Tb1.ICSD_606848   | metal      | metal     |
| Al8Cr4Th1.ICSD_54964    | metal      | metal     |
| Al8Cr4Th1.ICSD_606850   | metal      | metal     |
| Al8Cr4Y1.ICSD_57664     | metal      | metal     |
| Al8Cr4Y1.ICSD_606869    | metal      | metal     |
| Al8Cr4Yb1.ICSD_606871   | metal      | metal     |
| Al8Cr5.ICSD_606753      | metal      | metal     |
| Al8Cu4Dy1.ICSD_606899   | metal      | metal     |
| Al8Cu4Er1.ICSD_606913   | metal      | metal     |
| Al8Cu4Eu1.ICSD_606928   | metal      | metal     |
| Al8Cu4Gd1.ICSD_606934   | metal      | metal     |
| Al8Cu4Ho1.ICSD_606964   | metal      | metal     |
| Al8Cu4Lu1.ICSD_606997   | metal      | metal     |
| Al8Cu4Nd1.ICSD_607039   | metal      | metal     |
| Al8Cu4Pr1.ICSD_607058   | metal      | metal     |
| Al8Cu4Tb1.ICSD_607133   | metal      | metal     |
| Al8Cu4Th1.ICSD_607143   | metal      | metal     |
| Al8Cu4U1.ICSD_57724     | metal      | metal     |
| Al8Cu4Y1.ICSD_607184    | metal      | metal     |
| Al8Cu4Yb1.ICSD_607191   | metal      | metal     |

Supplementary Table 60. Five-fold cross validated predictions for the metal/insulator classification (52/598).

| system                    | calculated | predicted |
|---------------------------|------------|-----------|
| Al8Dy1Fe4.ICSD_607289     | metal      | metal     |
| Al8Dy1Mn4.ICSD_607312     | metal      | metal     |
| Al8Er1Fe4.ICSD_607382     | metal      | metal     |
| Al8Er1Mn4.ICSD_607412     | metal      | metal     |
| Al8Eu1Mn4.ICSD_607460     | metal      | metal     |
| Al8Fe1Mg3Si6.ICSD_27140   | metal      | metal     |
| Al8Fe4Gd1.ICSD_607505     | metal      | metal     |
| Al8Fe4Hf1.ICSD_607535     | metal      | metal     |
| Al8Fe4Ho1.ICSD_607546     | metal      | metal     |
| Al8Fe4La1.ICSD_607554     | metal      | metal     |
| Al8Fe4Lu1.ICSD_607568     | metal      | metal     |
| Al8Fe4Nd1.ICSD_607593     | metal      | metal     |
| Al8Fe4Sc1.ICSD_164856     | metal      | metal     |
| Al8Fe4Tb1.ICSD_57822      | metal      | metal     |
| Al8Fe4Th1.ICSD_607671     | metal      | metal     |
| Al8Fe4U1.ICSD_607699      | metal      | metal     |
| Al8Fe4Y1.ICSD_607728      | metal      | metal     |
| Al8Fe4Yb1.ICSD_607748     | metal      | metal     |
| Al8Fe4Zr1.ICSD_607756     | metal      | metal     |
| Al8Fe5Si9U6.ICSD_183358   | metal      | metal     |
| Al8Fe5.ICSD_169547        | metal      | metal     |
| Al8Ge3Sr14.ICSD_173215    | metal      | metal     |
| Al8Ho1Mn4.ICSD_608195     | metal      | metal     |
| Al8La1Mn4.ICSD_608299     | metal      | metal     |
| Al8Lu1Mn4.ICSD_608379     | metal      | metal     |
| Al8Mn4Nd1.ICSD_608479     | metal      | metal     |
| Al8Mn4Pr1.ICSD_608494     | metal      | metal     |
| Al8Mn4Sc1.ICSD_99142      | metal      | metal     |
| Al8Mn4Tb1.ICSD_608537     | metal      | metal     |
| Al8Mn4Th1.ICSD_608539     | metal      | metal     |
| Al8Mn4U1.ICSD_105516      | metal      | metal     |
| Al8Mn4U1.ICSD_608550      | metal      | metal     |
| Al8Mn4U1.ICSD_608553      | metal      | metal     |
| Al8Mn4Y1.ICSD_608564      | metal      | metal     |
| Al8Mn4Yb1.ICSD_608570     | metal      | metal     |
| Al8Mo3.ICSD_58002         | insulator  | metal     |
| Al8Si38.ICSD_180298       | metal      | insulator |
| Al9Ba1Co2.ICSD_606143     | metal      | metal     |
| Al9Ba1Fe2.ICSD_57518      | metal      | metal     |
| Al9Ba1Ni2.ICSD_107746     | metal      | metal     |
| Al9Ca1Co2.ICSD_57535      | metal      | metal     |
| Al9Ca1Ni1.ICSD_63626      | metal      | metal     |
| Al9Co2Eu1.ICSD_409394     | metal      | metal     |
| Al9Co2Sr1.ICSD_57633      | metal      | metal     |
| Al9Co2.ICSD_57598         | metal      | metal     |
| Al9Co3U2.ICSD_157329      | metal      | metal     |
| Al9Co3Y2.ICSD_104653      | metal      | metal     |
| Al9Er1Ni3.ICSD_105031     | metal      | metal     |
| Al9Fe1Mg3Si5.ICSD_96905   | metal      | metal     |
| Al9Fe2H1O24Si4.ICSD_16769 | insulator  | insulator |

Supplementary Table 61. Five-fold cross validated predictions for the metal/insulator classification (53/598).

| system                      | calculated | predicted |
|-----------------------------|------------|-----------|
| Al9Fe2.ICSD_607498          | metal      | metal     |
| Al9Gd2Ir3.ICSD_370034       | metal      | metal     |
| Al9Ir2.ICSD_414302          | metal      | metal     |
| Al9Ir2.ICSD_608238          | metal      | metal     |
| Al9Mn3Si1.ICSD_76249        | metal      | metal     |
| Al9Ni2Sr1.ICSD_608861       | metal      | metal     |
| Al9Rh2.ICSD_414304          | metal      | metal     |
| Al9Rh2.ICSD_58154           | metal      | metal     |
| Al9Sr5.ICSD_62343           | metal      | metal     |
| Ar1.ICSD_426923             | insulator  | insulator |
| Ar1.ICSD_77918              | insulator  | insulator |
| As1.01Ce1Se0.99.ICSD_249802 | insulator  | insulator |
| As11Rb3.ICSD_412872         | insulator  | insulator |
| As12Ce1Fe4.ICSD_610003      | insulator  | metal     |
| As12Ce1Os4.ICSD_610010      | metal      | metal     |
| As12Ce1Ru4.ICSD_610013      | insulator  | metal     |
| As12Fe4La1.ICSD_23080       | metal      | metal     |
| As12La1Os4.ICSD_610776      | metal      | metal     |
| As12La1Ru4.ICSD_610778      | metal      | insulator |
| As12Nd1Os4.ICSD_611007      | metal      | metal     |
| As12Ni2Re5.ICSD_35731       | metal      | metal     |
| As12Os4Pr1.ICSD_611141      | metal      | metal     |
| As12Os4Th1.ICSD_611145      | insulator  | metal     |
| As12Pr1Ru4.ICSD_611222      | metal      | metal     |
| As14Ba3.ICSD_1404           | insulator  | insulator |
| As1Au1Ba1.ICSD_420341       | metal      | metal     |
| As1Au1Ca1.ICSD_404725       | metal      | metal     |
| As1Au1Eu1.ICSD_43870        | metal      | metal     |
| As1Au1K2S4.ICSD_85681       | insulator  | insulator |
| As1Au1Na2.ICSD_23254        | insulator  | insulator |
| As1B1Ba1O5.ICSD_404439      | insulator  | insulator |
| As1B1Ba3O3.ICSD_402682      | insulator  | insulator |
| As1B1O4.ICSD_413436         | insulator  | insulator |
| As1B1O4.ICSD_413438         | insulator  | insulator |
| As1B1O5Pb1.ICSD_404328      | insulator  | insulator |
| As1B1.ICSD_181292           | insulator  | insulator |
| As1B2P1.ICSD_181293         | insulator  | insulator |
| As1B6.ICSD_68151            | insulator  | metal     |
| As1Ba1Cu1.ICSD_41705        | metal      | metal     |
| As1Ba1Li1.ICSD_56445        | insulator  | insulator |
| As1Ba1O6V1.ICSD_83629       | insulator  | insulator |
| As1Ba1Pd1.ICSD_404724       | metal      | metal     |
| As1Ba1Pt1.ICSD_59192        | metal      | metal     |
| As1Ba2Fe1O3Sc1.ICSD_420654  | metal      | metal     |
| As1Ba2.ICSD_87345           | metal      | metal     |
| As1Be1Cs1O4.ICSD_74027      | insulator  | insulator |
| As1Be1Li1.ICSD_100004       | insulator  | insulator |
| As1Be1Na1.ICSD_100091       | insulator  | insulator |
| As1Bi1Ca2O6.ICSD_91475      | insulator  | insulator |
| As1Bi1Cu2O6.ICSD_88111      | metal      | insulator |

Supplementary Table 62. Five-fold cross validated predictions for the metal/insulator classification (54/598).

| system                    | calculated | predicted |
|---------------------------|------------|-----------|
| As1Bi1Mg2O6.ICSD_73895    | insulator  | insulator |
| As1Bi1Mn1O5.ICSD_59721    | insulator  | insulator |
| As1Bi1Ni1O5.ICSD_92916    | insulator  | insulator |
| As1Bi1O4.ICSD_27199       | insulator  | insulator |
| As1Bi1O4.ICSD_30636       | insulator  | insulator |
| As1Bi1O5Pb1.ICSD_419124   | insulator  | insulator |
| As1Bi3Ni18S16.ICSD_203066 | metal      | metal     |
| As1Br1Hg3O4.ICSD_411758   | insulator  | insulator |
| As1Br1Hg3S4.ICSD_280330   | insulator  | insulator |
| As1Br1Hg3Se4.ICSD_280331  | insulator  | insulator |
| As1Br3Ca3.ICSD_426        | insulator  | insulator |
| As1Br3F6S1.ICSD_202502    | insulator  | insulator |
| As1Br3F6Te1.ICSD_200689   | insulator  | insulator |
| As1Br3F6.ICSD_33811       | insulator  | insulator |
| As1Br3.ICSD_26774         | insulator  | insulator |
| As1C1Cl2F9S1.ICSD_60141   | insulator  | insulator |
| As1C1F11N2S3.ICSD_81839   | insulator  | insulator |
| As1C1F5N2O1S2.ICSD_16422  | insulator  | insulator |
| As1C1F6H5O1.ICSD_408996   | insulator  | insulator |
| As1C1F9H3N1O1.ICSD_41317  | insulator  | insulator |
| As1C1Nb2.ICSD_180617      | metal      | metal     |
| As1C1V2.ICSD_43874        | metal      | metal     |
| As1C1V3.ICSD_609887       | metal      | metal     |
| As1C2Cs1H6Se2.ICSD_171201 | insulator  | insulator |
| As1C2F6H5O2.ICSD_407344   | insulator  | insulator |
| As1C2F6N1O2.ICSD_410737   | insulator  | insulator |
| As1C3H10I1.ICSD_171203    | insulator  | insulator |
| As1C3H6N1.ICSD_170721     | insulator  | insulator |
| As1C3N3.ICSD_35330        | insulator  | insulator |
| As1Ca1Co1H1O5.ICSD_240725 | insulator  | insulator |
| As1Ca1Cu1.ICSD_49741      | insulator  | metal     |
| As1Ca1F1Fe1.ICSD_186504   | metal      | metal     |
| As1Ca1F1Mg1O4.ICSD_26000  | insulator  | insulator |
| As1Ca1F1Mg1O4.ICSD_56862  | insulator  | insulator |
| As1Ca1H1Ni1O5.ICSD_202422 | insulator  | insulator |
| As1Ca1H1O5Zn1.ICSD_63285  | insulator  | insulator |
| As1Ca1Na1O4.ICSD_262123   | insulator  | insulator |
| As1Ca1Rb1.ICSD_409177     | insulator  | insulator |
| As1Ca1.ICSD_26263         | metal      | metal     |
| As1Ca2Cl1O4.ICSD_26234    | insulator  | insulator |
| As1Ca2F13H4.ICSD_415156   | insulator  | insulator |
| As1Ca2I1.ICSD_65218       | insulator  | insulator |
| As1Ca2.ICSD_166865        | insulator  | metal     |
| As1Ca3Cl3.ICSD_36002      | insulator  | insulator |
| As1Ca3N1.ICSD_56968       | insulator  | insulator |
| As1Ca3N1.ICSD_657356      | insulator  | insulator |
| As1Cd1Ce1O1.ICSD_88268    | insulator  | insulator |
| As1Cd1K1.ICSD_609963      | insulator  | insulator |
| As1Cd1Li1.ICSD_609965     | metal      | metal     |
| As1Cd1Li1.ICSD_609966     | metal      | metal     |

Supplementary Table 63. Five-fold cross validated predictions for the metal/insulator classification (55/598).

| system                  | calculated | predicted |
|-------------------------|------------|-----------|
| As1Cd1Na1.ICSD_609968   | metal      | insulator |
| As1Cd1Pd5.ICSD_609974   | metal      | metal     |
| As1Cd1Pt5.ICSD_609975   | metal      | metal     |
| As1Cd1.ICSD_432         | insulator  | insulator |
| As1Cd2Cl2.ICSD_26013    | insulator  | insulator |
| As1Cd2F1O4.ICSD_202983  | insulator  | insulator |
| As1Cd3Cl3.ICSD_23306    | insulator  | insulator |
| As1Ce1F1O4.ICSD_166934  | insulator  | insulator |
| As1Ce1Fe1O1.ICSD_162819 | metal      | metal     |
| As1Ce1Ni1O1.ICSD_174440 | metal      | metal     |
| As1Ce1Ni1O1.ICSD_182625 | metal      | metal     |
| As1Ce1O1Ru1.ICSD_188947 | metal      | metal     |
| As1Ce1O4.ICSD_280982    | insulator  | insulator |
| As1Ce1Pd1.ICSD_71613    | metal      | metal     |
| As1Ce1Rh1.ICSD_90869    | metal      | metal     |
| As1Ce1S1.ICSD_42432     | metal      | metal     |
| As1Ce1S1.ICSD_610017    | metal      | metal     |
| As1Ce1.ICSD_609995      | metal      | metal     |
| As1Cl13Nb1P1.ICSD_25110 | insulator  | insulator |
| As1Cl13P1Sb1.ICSD_25109 | insulator  | insulator |
| As1Cl13P1Ta1.ICSD_25111 | insulator  | insulator |
| As1Cl1Co2O4.ICSD_902    | insulator  | insulator |
| As1Cl1Cu2O4.ICSD_901    | insulator  | insulator |
| As1Cl1Hg3O4.ICSD_411757 | insulator  | insulator |
| As1Cl1Hg3S4.ICSD_280329 | insulator  | insulator |
| As1Cl1O2Pb1.ICSD_66246  | insulator  | insulator |
| As1Cl2Hg2.ICSD_39930    | insulator  | insulator |
| As1Cl3F5O1P1.ICSD_82761 | insulator  | insulator |
| As1Cl3F6S1.ICSD_60076   | insulator  | insulator |
| As1Cl3F6S3.ICSD_154804  | metal      | insulator |
| As1Cl3F6Se1.ICSD_66843  | insulator  | insulator |
| As1Cl3.ICSD_35133       | insulator  | insulator |
| As1Cl5.ICSD_412103      | insulator  | insulator |
| As1Co1Hf1.ICSD_406953   | metal      | metal     |
| As1Co1La1O1.ICSD_167818 | metal      | metal     |
| As1Co1Li1O4.ICSD_155305 | insulator  | insulator |
| As1Co1Mn1.ICSD_610084   | metal      | metal     |
| As1Co1Nb1.ICSD_610089   | metal      | metal     |
| As1Co1Nd1O1.ICSD_180774 | metal      | metal     |
| As1Co1Ni1.ICSD_610094   | metal      | metal     |
| As1Co1Rh1.ICSD_43896    | metal      | metal     |
| As1Co1S1.ICSD_36395     | insulator  | insulator |
| As1Co1S1.ICSD_41857     | metal      | insulator |
| As1Co1S1.ICSD_41858     | metal      | insulator |
| As1Co1S1.ICSD_610107    | insulator  | metal     |
| As1Co1S1.ICSD_69129     | insulator  | metal     |
| As1Co1Se1.ICSD_41731    | insulator  | insulator |
| As1Co1.ICSD_43888       | metal      | metal     |
| As1Co1.ICSD_610033      | metal      | metal     |
| As1Co1.ICSD_610048      | metal      | metal     |

Supplementary Table 64. Five-fold cross validated predictions for the metal/insulator classification (56/598).

| system                      | calculated | predicted |
|-----------------------------|------------|-----------|
| As1Co2Cr1_ICSD_180207       | metal      | metal     |
| As1Co2_ICSD_610030          | metal      | metal     |
| As1Cr1Ni1_ICSD_43913        | metal      | metal     |
| As1Cr1Ni1_ICSD_610244       | metal      | metal     |
| As1Cr1O4_ICSD_62132         | insulator  | insulator |
| As1Cr1Rh1_ICSD_43919        | metal      | metal     |
| As1Cr1Rh1_ICSD_601513       | metal      | metal     |
| As1Cr1Rh1_ICSD_610256       | metal      | metal     |
| As1Cr1Ti1_ICSD_610275       | metal      | metal     |
| As1Cr1_ICSD_107934          | metal      | metal     |
| As1Cr1_ICSD_42640           | metal      | metal     |
| As1Cr2_ICSD_610130          | metal      | metal     |
| As1Cr2_ICSD_610131          | metal      | metal     |
| As1Cr2_ICSD_610145          | metal      | metal     |
| As1Cr2_ICSD_610153          | metal      | metal     |
| As1Cr3N1_ICSD_25760         | metal      | metal     |
| As1Cs1F4_ICSD_413041        | insulator  | insulator |
| As1Cs1F6_ICSD_408070        | insulator  | insulator |
| As1Cs1H12Mg1O10_ICSD_260150 | insulator  | insulator |
| As1Cs1O5Ti1_ICSD_280315     | insulator  | insulator |
| As1Cs1Se2_ICSD_65299        | insulator  | insulator |
| As1Cs2Li1O4_ICSD_36645      | insulator  | insulator |
| As1Cs2Na1O4_ICSD_36533      | insulator  | insulator |
| As1Cs3Ge1Se5_ICSD_415214    | metal      | insulator |
| As1Cs3O4_ICSD_412392        | insulator  | insulator |
| As1Cs3Se4_ICSD_404082       | insulator  | insulator |
| As1Cs3_ICSD_409668          | metal      | metal     |
| As1Cs5P4S12_ICSD_260946     | insulator  | insulator |
| As1Cu1Eu1_ICSD_107941       | metal      | metal     |
| As1Cu1F7_ICSD_413972        | insulator  | insulator |
| As1Cu1Ge1Hf1_ICSD_185859    | metal      | metal     |
| As1Cu1Ge1Ti1_ICSD_185857    | metal      | metal     |
| As1Cu1Ge1Zr1_ICSD_423103    | metal      | metal     |
| As1Cu1H1O5Zn1_ICSD_160894   | insulator  | insulator |
| As1Cu1Hf1Si1_ICSD_185856    | metal      | metal     |
| As1Cu1K2_ICSD_43936         | insulator  | insulator |
| As1Cu1Li2_ICSD_43938        | metal      | insulator |
| As1Cu1Mg1_ICSD_412296       | metal      | metal     |
| As1Cu1Mn1_ICSD_423230       | metal      | metal     |
| As1Cu1Mn1_ICSD_72413        | metal      | metal     |
| As1Cu1Na2_ICSD_43937        | insulator  | insulator |
| As1Cu1O1Th1_ICSD_183136     | metal      | metal     |
| As1Cu1O4Pb1_ICSD_61677      | insulator  | insulator |
| As1Cu1O4Ti1_ICSD_50458      | insulator  | insulator |
| As1Cu1O4Ti2_ICSD_407563     | insulator  | insulator |
| As1Cu1O4Ti2_ICSD_50456      | insulator  | insulator |
| As1Cu1S1_ICSD_23826         | insulator  | insulator |
| As1Cu1S1_ICSD_240925        | insulator  | insulator |
| As1Cu1Se1_ICSD_610356       | metal      | metal     |
| As1Cu1Se2_ICSD_42884        | insulator  | metal     |

Supplementary Table 65. Five-fold cross validated predictions for the metal/insulator classification (57/598).

| system                       | calculated | predicted |
|------------------------------|------------|-----------|
| As1Cu1Si1Ti1_ICSD_185854     | metal      | metal     |
| As1Cu1Si1Zr1_ICSD_185855     | metal      | metal     |
| As1Cu1Sr1_ICSD_107943        | insulator  | metal     |
| As1Cu1Te1_ICSD_610367        | metal      | metal     |
| As1Cu1_ICSD_610308           | metal      | metal     |
| As1Cu3S4_ICSD_42516          | metal      | metal     |
| As1Cu3S4_ICSD_95547          | insulator  | metal     |
| As1Cu3Se4_ICSD_610361        | metal      | metal     |
| As1Cu3_ICSD_16840            | metal      | metal     |
| As1Cu3_ICSD_655109           | metal      | metal     |
| As1Cu4K1S4_ICSD_75430        | insulator  | insulator |
| As1Dy1O4_ICSD_16512          | insulator  | insulator |
| As1Dy1Pd1_ICSD_656672        | insulator  | insulator |
| As1Dy1Pt1_ICSD_610382        | metal      | metal     |
| As1Dy1_ICSD_187521           | metal      | metal     |
| As1Dy1_ICSD_43638            | metal      | metal     |
| As1Er1O1Zn1_ICSD_420203      | insulator  | insulator |
| As1Er1Pd1_ICSD_656673        | metal      | insulator |
| As1Er1Pt1_ICSD_610395        | metal      | metal     |
| As1Er1S1_ICSD_610398         | metal      | metal     |
| As1Er1_ICSD_167763           | metal      | metal     |
| As1Er1_ICSD_610387           | metal      | metal     |
| As1Eu1Na1S4_ICSD_262583      | insulator  | insulator |
| As1Eu1O4_ICSD_409995         | metal      | insulator |
| As1Eu1Pt1_ICSD_60829         | metal      | metal     |
| As1F11H1N1S1Xe1_ICSD_249654  | insulator  | insulator |
| As1F11H1N1Te1Xe1_ICSD_171447 | insulator  | insulator |
| As1F12I1_ICSD_249129         | insulator  | insulator |
| As1F1Fe1Sr1_ICSD_168774      | metal      | metal     |
| As1F1Fe1Sr1_ICSD_186507      | metal      | metal     |
| As1F3_ICSD_35132             | insulator  | insulator |
| As1F5H6N2_ICSD_412507        | insulator  | insulator |
| As1F5N4S4_ICSD_14083         | insulator  | insulator |
| As1F5_ICSD_65477             | insulator  | insulator |
| As1F6H2Li1O1_ICSD_59367      | insulator  | insulator |
| As1F6H3O1_ICSD_61236         | insulator  | insulator |
| As1F6H6Li1O3_ICSD_416608     | insulator  | insulator |
| As1F6I1Se6_ICSD_35351        | insulator  | insulator |
| As1F6I3_ICSD_15527           | insulator  | insulator |
| As1F6I5_ICSD_59115           | insulator  | insulator |
| As1F6In1_ICSD_417952         | insulator  | insulator |
| As1F6K1_ICSD_16663           | insulator  | insulator |
| As1F6K1_ICSD_2362            | insulator  | insulator |
| As1F6Li1_ICSD_74831          | insulator  | insulator |
| As1F6N1O2_ICSD_68906         | insulator  | insulator |
| As1F6N1S2_ICSD_62120         | insulator  | insulator |
| As1F6N2S3_ICSD_31787         | insulator  | insulator |
| As1F6N2S3_ICSD_4043          | insulator  | insulator |
| As1F6Na1_ICSD_184563         | insulator  | insulator |
| As1F6Na1_ICSD_184564         | insulator  | insulator |

Supplementary Table 66. Five-fold cross validated predictions for the metal/insulator classification (58/598).

| system                    | calculated | predicted |
|---------------------------|------------|-----------|
| As1F6Rb1_ICSD_408069      | insulator  | insulator |
| As1F6Tl1_ICSD_417954      | insulator  | insulator |
| As1F7Kr1_ICSD_279624      | insulator  | insulator |
| As1F7Pb1_ICSD_411788      | insulator  | insulator |
| As1F7Sn1_ICSD_816         | insulator  | insulator |
| As1F8Sb1_ICSD_9920        | insulator  | insulator |
| As1F9O1S1_ICSD_10193      | insulator  | insulator |
| As1Fe1La1O1_ICSD_180435   | metal      | metal     |
| As1Fe1La1O1_ICSD_180436   | metal      | metal     |
| As1Fe1Li1O4_ICSD_245182   | insulator  | insulator |
| As1Fe1Li1_ICSD_166457     | metal      | metal     |
| As1Fe1Li1_ICSD_168206     | metal      | metal     |
| As1Fe1Li1_ICSD_187131     | metal      | metal     |
| As1Fe1Li1_ICSD_187132     | insulator  | metal     |
| As1Fe1Li1_ICSD_187133     | metal      | metal     |
| As1Fe1Mn1_ICSD_610492     | metal      | metal     |
| As1Fe1Mn1_ICSD_93239      | metal      | metal     |
| As1Fe1Na1_ICSD_163143     | metal      | metal     |
| As1Fe1Na1_ICSD_187136     | metal      | metal     |
| As1Fe1Nb1_ICSD_610502     | metal      | metal     |
| As1Fe1Nd1O1_ICSD_163546   | metal      | metal     |
| As1Fe1Nd1O1_ICSD_164679   | metal      | metal     |
| As1Fe1Nd1O1_ICSD_164680   | metal      | metal     |
| As1Fe1Ni1_ICSD_610509     | metal      | metal     |
| As1Fe1O1Pr1_ICSD_162833   | metal      | metal     |
| As1Fe1O1Tb1_ICSD_422004   | metal      | metal     |
| As1Fe1O3Sr2V1_ICSD_184994 | metal      | metal     |
| As1Fe1O4_ICSD_73978       | metal      | insulator |
| As1Fe1S1_ICSD_15986       | metal      | insulator |
| As1Fe1S1_ICSD_15987       | insulator  | metal     |
| As1Fe1S1_ICSD_185809      | insulator  | metal     |
| As1Fe1S1_ICSD_43508       | metal      | insulator |
| As1Fe1Ta1_ICSD_610528     | metal      | metal     |
| As1Fe1Te1_ICSD_610529     | insulator  | metal     |
| As1Fe1Ti1_ICSD_610530     | metal      | metal     |
| As1Fe1V1_ICSD_610532      | metal      | metal     |
| As1Fe1_ICSD_42449         | metal      | metal     |
| As1Fe1_ICSD_42451         | metal      | metal     |
| As1Fe2Ti1_ICSD_186059     | metal      | metal     |
| As1Fe2_ICSD_610470        | metal      | metal     |
| As1Ga1O4_ICSD_33256       | insulator  | insulator |
| As1Ga1O4_ICSD_423937      | insulator  | insulator |
| As1Ga1Pd5_ICSD_610564     | metal      | metal     |
| As1Ga1_ICSD_41992         | metal      | insulator |
| As1Ga1_ICSD_43950         | metal      | insulator |
| As1Ga1_ICSD_43951         | metal      | metal     |
| As1Ga1_ICSD_610543        | insulator  | metal     |
| As1Ga1_ICSD_67773         | insulator  | insulator |
| As1Ga2Rh5_ICSD_56973      | metal      | metal     |
| As1Gd1O1Zn1_ICSD_420206   | insulator  | insulator |

Supplementary Table 67. Five-fold cross validated predictions for the metal/insulator classification (59/598).

| system                      | calculated | predicted |
|-----------------------------|------------|-----------|
| As1Gd1S1_ICSD_610596        | metal      | metal     |
| As1Gd1_ICSD_610585          | metal      | metal     |
| As1Ge1Nb1_ICSD_610611       | metal      | metal     |
| As1Ge1Se1_ICSD_100828       | insulator  | insulator |
| As1Ge1_ICSD_17033           | metal      | metal     |
| As1Ge1_ICSD_610598          | insulator  | insulator |
| As1H1Hg1O5Zn1_ICSD_281591   | insulator  | insulator |
| As1H1O4Pb1_ICSD_29552       | insulator  | insulator |
| As1H1O5Pb1Zn1_ICSD_98385    | insulator  | insulator |
| As1H1O5Zn2_ICSD_34868       | insulator  | insulator |
| As1H2Li1O4_ICSD_62024       | insulator  | insulator |
| As1H2Li1O5Zn1_ICSD_409396   | insulator  | insulator |
| As1H2Mn1O5_ICSD_71164       | insulator  | insulator |
| As1H36Li3N12Se4_ICSD_409539 | insulator  | insulator |
| As1H3_ICSD_24499            | metal      | insulator |
| As1H4Na1O5_ICSD_4284        | insulator  | insulator |
| As1H4Na1O6Zn1_ICSD_407316   | insulator  | insulator |
| As1H6N1O4_ICSD_66206        | insulator  | insulator |
| As1H6N1O4_ICSD_66208        | insulator  | insulator |
| As1H6N1O4_ICSD_66210        | insulator  | insulator |
| As1Hf1Os1_ICSD_610652       | metal      | metal     |
| As1Hf1Ru1_ICSD_610654       | metal      | metal     |
| As1Hf1Ru1_ICSD_610655       | metal      | metal     |
| As1Hf1_ICSD_42915           | metal      | metal     |
| As1Hf2_ICSD_610638          | metal      | metal     |
| As1Hf3_ICSD_10490           | metal      | metal     |
| As1Hf9Mo4_ICSD_610646       | metal      | metal     |
| As1Hf9Re4_ICSD_610653       | metal      | metal     |
| As1Hf9W4_ICSD_610661        | metal      | metal     |
| As1Hg1K1_ICSD_10458         | metal      | insulator |
| As1Hg1Pd5_ICSD_610664       | metal      | metal     |
| As1Hg1S3Ti1_ICSD_610665     | metal      | insulator |
| As1Hg31Se4_ICSD_280332      | insulator  | insulator |
| As1Ho1O4_ICSD_155919        | insulator  | insulator |
| As1Ho1Pd1_ICSD_71619        | insulator  | metal     |
| As1Ho1Pt1_ICSD_610678       | metal      | metal     |
| As1Ho1_ICSD_187364          | metal      | metal     |
| As1Ho1_ICSD_610670          | metal      | metal     |
| As1I1Se1_ICSD_200799        | insulator  | insulator |
| As1I3La3_ICSD_411803        | metal      | metal     |
| As1I3_ICSD_56571            | insulator  | insulator |
| As1In1Pd5_ICSD_610706       | metal      | metal     |
| As1In1Pt5_ICSD_610708       | metal      | metal     |
| As1In1_ICSD_156105          | metal      | metal     |
| As1In1_ICSD_41993           | metal      | metal     |
| As1In1_ICSD_43972           | metal      | metal     |
| As1In1_ICSD_610687          | metal      | metal     |
| As1K1Li2_ICSD_78938         | insulator  | insulator |
| As1K1Mg1_ICSD_610753        | insulator  | insulator |
| As1K1Mo1O6_ICSD_203218      | insulator  | insulator |

Supplementary Table 68. Five-fold cross validated predictions for the metal/insulator classification (60/598).

| system                   | calculated | predicted |
|--------------------------|------------|-----------|
| As1K1NiO4.ICSD.63544     | insulator  | insulator |
| As1K1O2.ICSD.413149      | insulator  | insulator |
| As1K1O5Ti1.ICSD.75322    | insulator  | insulator |
| As1K1S5Sn1.ICSD.281038   | insulator  | insulator |
| As1K1Se2.ICSD.65297      | insulator  | insulator |
| As1K1Sn1.ICSD.610765     | insulator  | insulator |
| As1K1Zn1.ICSD.10459      | insulator  | insulator |
| As1K1Zn1.ICSD.43985      | insulator  | insulator |
| As1K1.ICSD.409653        | insulator  | insulator |
| As1K3S3.ICSD.610764      | insulator  | insulator |
| As1K3Se11Ta2.ICSD.413600 | insulator  | insulator |
| As1K3Se3.ICSD.50492      | insulator  | insulator |
| As1K3.ICSD.26887         | metal      | insulator |
| As1La1NiO1.ICSD.246061   | metal      | metal     |
| As1La1O1Ru1.ICSD.262831  | metal      | metal     |
| As1La1O1Zn1.ICSD.420204  | insulator  | insulator |
| As1La1O3.ICSD.423416     | insulator  | insulator |
| As1La1O4.ICSD.415338     | insulator  | insulator |
| As1La1Pd1.ICSD.56974     | metal      | metal     |
| As1La1Rh1.ICSD.95191     | metal      | metal     |
| As1La1S1.ICSD.610779     | insulator  | metal     |
| As1La1Te1.ICSD.280231    | insulator  | metal     |
| As1La1.ICSD.106265       | metal      | metal     |
| As1La1.ICSD.98427        | metal      | metal     |
| As1Li1Mg1O4.ICSD.67523   | insulator  | insulator |
| As1Li1Mg1.ICSD.107954    | insulator  | insulator |
| As1Li1Mn1O4.ICSD.245181  | insulator  | insulator |
| As1Li1Mo1O6.ICSD.15035   | insulator  | insulator |
| As1Li1Mo1O6.ICSD.59822   | insulator  | insulator |
| As1Li1Mo2O9.ICSD.170039  | insulator  | insulator |
| As1Li1Ni1O4.ICSD.245184  | insulator  | insulator |
| As1Li1O3.ICSD.16617      | insulator  | insulator |
| As1Li1O3.ICSD.202862     | insulator  | insulator |
| As1Li1O4Rb2.ICSD.36644   | insulator  | insulator |
| As1Li1O5Ti1.ICSD.172582  | insulator  | insulator |
| As1Li1O5V1.ICSD.90991    | insulator  | insulator |
| As1Li1S2.ICSD.419061     | insulator  | insulator |
| As1Li1Se2.ICSD.248116    | insulator  | insulator |
| As1Li1Se2.ICSD.248118    | insulator  | insulator |
| As1Li1Zn1.ICSD.74504     | insulator  | insulator |
| As1Li1.ICSD.26472        | insulator  | insulator |
| As1Li2Na1O4.ICSD.73200   | insulator  | insulator |
| As1Li3O4.ICSD.75927      | insulator  | insulator |
| As1Li3S3.ICSD.59381      | insulator  | insulator |
| As1Li3.ICSD.26878        | insulator  | insulator |
| As1Li3.ICSD.610785       | insulator  | insulator |
| As1Lu1O4.ICSD.2506       | insulator  | insulator |
| As1Lu1Pd1.ICSD.656676    | metal      | metal     |
| As1Lu1.ICSD.247648       | metal      | metal     |
| As1Lu1.ICSD.43993        | metal      | metal     |

Supplementary Table 69. Five-fold cross validated predictions for the metal/insulator classification (61/598).

| system                    | calculated | predicted |
|---------------------------|------------|-----------|
| As1Mg1Na1.ICSD.610829     | insulator  | insulator |
| As1Mg1Pt5.ICSD.610830     | metal      | metal     |
| As1Mn1Na1O4.ICSD.95087    | insulator  | insulator |
| As1Mn1Na1.ICSD.610878     | metal      | metal     |
| As1Mn1Nd1O1.ICSD.50242    | metal      | metal     |
| As1Mn1Ni1.ICSD.161716     | metal      | metal     |
| As1Mn1Ni1.ICSD.610883     | metal      | metal     |
| As1Mn1Ni1.ICSD.610884     | metal      | metal     |
| As1Mn1O4.ICSD.165271      | insulator  | insulator |
| As1Mn1Pd1.ICSD.610906     | metal      | metal     |
| As1Mn1Pd2.ICSD.107955     | metal      | metal     |
| As1Mn1Rb1.ICSD.610910     | metal      | metal     |
| As1Mn1Rh1.ICSD.610914     | metal      | metal     |
| As1Mn1Ru1.ICSD.44004      | metal      | metal     |
| As1Mn1Ru1.ICSD.601489     | metal      | metal     |
| As1Mn1Ti1.ICSD.610927     | metal      | metal     |
| As1Mn1.ICSD.16543         | metal      | metal     |
| As1Mn1.ICSD.184925        | metal      | metal     |
| As1Mn1.ICSD.250011        | metal      | metal     |
| As1Mn1.ICSD.76408         | metal      | metal     |
| As1Mn2.ICSD.610849        | metal      | metal     |
| As1Mn3.ICSD.76409         | metal      | metal     |
| As1Mo1O6Rb1.ICSD.280174   | insulator  | insulator |
| As1Mo1.ICSD.610957        | metal      | metal     |
| As1N1V3.ICSD.610970       | metal      | metal     |
| As1N2U2.ICSD.41947        | metal      | metal     |
| As1Na1Ni1O4.ICSD.63353    | insulator  | insulator |
| As1Na1O2.ICSD.413148      | insulator  | insulator |
| As1Na1O3.ICSD.16654       | insulator  | insulator |
| As1Na1O5Ti1.ICSD.421302   | insulator  | insulator |
| As1Na1S2.ICSD.854         | insulator  | insulator |
| As1Na1Sr1.ICSD.402448     | insulator  | insulator |
| As1Na1Zn1.ICSD.610979     | insulator  | insulator |
| As1Na1.ICSD.182158        | insulator  | insulator |
| As1Na1.ICSD.182160        | metal      | metal     |
| As1Na3S3.ICSD.645         | insulator  | insulator |
| As1Na3Se3.ICSD.50491      | insulator  | insulator |
| As1Na3.ICSD.182163        | metal      | insulator |
| As1Na3.ICSD.26883         | metal      | metal     |
| As1Na3.ICSD.81565         | metal      | metal     |
| As1Nb1Ni1.ICSD.610993     | metal      | metal     |
| As1Nb1Si1.ICSD.187693     | metal      | metal     |
| As1Nb1.ICSD.27040         | metal      | metal     |
| As1Nb2Rb3Se11.ICSD.413598 | insulator  | insulator |
| As1Nb3Te3.ICSD.79934      | metal      | metal     |
| As1Nb3.ICSD.1998          | metal      | metal     |
| As1Nd1O1Ru1.ICSD.262832   | metal      | metal     |
| As1Nd1O1Zn1.ICSD.85778    | insulator  | insulator |
| As1Nd1O4.ICSD.155918      | insulator  | insulator |
| As1Nd1Pd1.ICSD.71614      | metal      | metal     |

Supplementary Table 70. Five-fold cross validated predictions for the metal/insulator classification (62/598).

| system                  | calculated | predicted |
|-------------------------|------------|-----------|
| As1Nd1Pd1.ICSD_71615    | metal      | metal     |
| As1Nd1S1.ICSD_611011    | metal      | metal     |
| As1Nd1.ICSD_610998      | metal      | metal     |
| As1Ni1Pd1.ICSD_611044   | metal      | metal     |
| As1Ni1Rh1.ICSD_601484   | metal      | metal     |
| As1Ni1S1.ICSD_93899     | metal      | metal     |
| As1Ni1Se1.ICSD_93901    | metal      | metal     |
| As1Ni1Ta1.ICSD_611079   | metal      | metal     |
| As1Ni1Ti1.ICSD_611086   | metal      | metal     |
| As1Ni1V1.ICSD_611097    | metal      | metal     |
| As1Ni1.ICSD_611033      | metal      | metal     |
| As1Ni1.ICSD_655881      | metal      | metal     |
| As1Ni2Si1.ICSD_83753    | metal      | metal     |
| As1O1Y1Zn1.ICSD_420205  | insulator  | insulator |
| As1O2Rb1.ICSD_413150    | insulator  | insulator |
| As1O3Sb1.ICSD_37187     | insulator  | insulator |
| As1O4P1.ICSD_31879      | insulator  | insulator |
| As1O4Sb1.ICSD_23316     | insulator  | insulator |
| As1O4Sc1.ICSD_155920    | insulator  | insulator |
| As1O4Tb1.ICSD_16329     | insulator  | insulator |
| As1O4Tb1.ICSD_200231    | insulator  | insulator |
| As1O4Ti1Zn1.ICSD_74812  | insulator  | insulator |
| As1O4Ti3.ICSD_407561    | insulator  | insulator |
| As1O4Y1.ICSD_24513      | insulator  | insulator |
| As1O4Yb1.ICSD_171193    | metal      | metal     |
| As1O5P1.ICSD_36649      | insulator  | insulator |
| As1O5Rb1Sn1.ICSD_80977  | insulator  | insulator |
| As1O5Rb1Ti1.ICSD_280131 | insulator  | insulator |
| As1O5Sb1.ICSD_36650     | insulator  | insulator |
| As1Os1Zr1.ICSD_611146   | metal      | metal     |
| As1P1U1.ICSD_611155     | metal      | metal     |
| As1Pa1.ICSD_44041       | metal      | metal     |
| As1Pb2Pd3.ICSD_106267   | metal      | metal     |
| As1Pb3Zr5.ICSD_604204   | metal      | metal     |
| As1Pd1S1.ICSD_611197    | metal      | metal     |
| As1Pd1Se1.ICSD_611203   | metal      | metal     |
| As1Pd1Sm1.ICSD_71616    | metal      | metal     |
| As1Pd1Sr1.ICSD_404723   | metal      | metal     |
| As1Pd1Tb1.ICSD_656671   | insulator  | metal     |
| As1Pd1Yb1.ICSD_71620    | metal      | metal     |
| As1Pd1Zr1.ICSD_92440    | metal      | metal     |
| As1Pd2.ICSD_26279       | metal      | metal     |
| As1Pd2.ICSD_611190      | metal      | metal     |
| As1Pd3.ICSD_611183      | metal      | metal     |
| As1Pd5Sb1.ICSD_30009    | metal      | metal     |
| As1Pd5Ti1.ICSD_23540    | metal      | metal     |
| As1Pd5.ICSD_44042       | metal      | metal     |
| As1Pr1S1.ICSD_611223    | metal      | metal     |
| As1Pr1.ICSD_52010       | metal      | metal     |
| As1Pt1Sr1.ICSD_59187    | metal      | metal     |

Supplementary Table 71. Five-fold cross validated predictions for the metal/insulator classification (63/598).

| system                 | calculated | predicted |
|------------------------|------------|-----------|
| As1Pt1Y1.ICSD_44047    | metal      | metal     |
| As1Pt1Yb1.ICSD_611243  | metal      | metal     |
| As1Pt5Ti1.ICSD_611241  | metal      | metal     |
| As1Pt5Zn1.ICSD_611244  | metal      | metal     |
| As1Pu1.ICSD_44048      | metal      | metal     |
| As1Pu1.ICSD_44049      | metal      | metal     |
| As1Rb1.ICSD_412594     | insulator  | insulator |
| As1Rb3Se16.ICSD_405959 | insulator  | insulator |
| As1Rb3Se4.ICSD_404080  | insulator  | insulator |
| As1Rb3.ICSD_25551      | metal      | insulator |
| As1Rh1Ti1.ICSD_601549  | metal      | metal     |
| As1Rh1V1.ICSD_107965   | metal      | metal     |
| As1Rh1.ICSD_42572      | metal      | metal     |
| As1Rh2.ICSD_43511      | metal      | metal     |
| As1Rh2.ICSD_611266     | metal      | metal     |
| As1Ru1Te1.ICSD_611299  | insulator  | insulator |
| As1Ru1Ti1.ICSD_611300  | metal      | metal     |
| As1Ru1Zr1.ICSD_35593   | metal      | metal     |
| As1Ru1.ICSD_611293     | metal      | metal     |
| As1S1Sm1.ICSD_611320   | metal      | metal     |
| As1S1Sm1.ICSD_96227    | metal      | metal     |
| As1S1Th1.ICSD_611325   | metal      | metal     |
| As1S1Tm1.ICSD_611336   | metal      | metal     |
| As1S1U1.ICSD_66945     | metal      | metal     |
| As1S1.ICSD_180621      | insulator  | insulator |
| As1S2Ti1.ICSD_26514    | metal      | insulator |
| As1S2Ti1.ICSD_658371   | insulator  | insulator |
| As1S2.ICSD_424590      | insulator  | insulator |
| As1S3Ti3.ICSD_611332   | insulator  | insulator |
| As1S3Ti3.ICSD_79580    | insulator  | insulator |
| As1S4Ti3.ICSD_61057    | insulator  | insulator |
| As1Sb3Zr5.ICSD_611352  | metal      | metal     |
| As1Sc1.ICSD_164628     | metal      | metal     |
| As1Sc1.ICSD_44057      | metal      | metal     |
| As1Se1Th1.ICSD_611384  | metal      | metal     |
| As1Se1U1.ICSD_66946    | metal      | metal     |
| As1Se3Ti3.ICSD_603666  | insulator  | insulator |
| As1Si1Ta1.ICSD_42355   | metal      | metal     |
| As1Si1.ICSD_611404     | insulator  | insulator |
| As1Sm1.ICSD_611421     | metal      | metal     |
| As1Sm1.ICSD_611422     | metal      | metal     |
| As1Sn1.ICSD_44063      | metal      | metal     |
| As1Sr1.ICSD_26264      | metal      | metal     |
| As1Sr2.ICSD_44066      | metal      | metal     |
| As1Ta1.ICSD_611451     | metal      | metal     |
| As1Ta2.ICSD_611452     | metal      | metal     |
| As1Ta3.ICSD_611459     | metal      | metal     |
| As1Tb1.ICSD_43601      | metal      | metal     |
| As1Te1Th1.ICSD_611471  | metal      | metal     |
| As1Te1Ti1.ICSD_281420  | metal      | metal     |

Supplementary Table 72. Five-fold cross validated predictions for the metal/insulator classification (64/598).

| system                  | calculated | predicted |
|-------------------------|------------|-----------|
| As1Te1U1.ICSD_87139     | metal      | metal     |
| As1Te1.ICSD_44071       | metal      | metal     |
| As1Th1.ICSD_44073       | metal      | metal     |
| As1Th1.ICSD_611485      | metal      | metal     |
| As1Ti1Zr1.ICSD_92989    | metal      | metal     |
| As1Ti1.ICSD_44981       | metal      | metal     |
| As1Ti1.ICSD_611502      | metal      | metal     |
| As1Ti3.ICSD_611498      | metal      | metal     |
| As1Ti3.ICSD_611501      | metal      | metal     |
| As1Ti1.ICSD_184574      | metal      | metal     |
| As1Tm1.ICSD_43647       | metal      | metal     |
| As1Tm1.ICSD_611521      | metal      | metal     |
| As1U1.ICSD_44079        | metal      | metal     |
| As1U1.ICSD_611545       | metal      | metal     |
| As1V1.ICSD_42445        | metal      | metal     |
| As1V1.ICSD_42446        | metal      | metal     |
| As1V1.ICSD_44083        | metal      | metal     |
| As1V3.ICSD_611575       | metal      | metal     |
| As1Y1.ICSD_160147       | metal      | metal     |
| As1Y1.ICSD_658803       | metal      | metal     |
| As1Yb1.ICSD_44088       | metal      | metal     |
| As1Zn1.ICSD_431         | insulator  | insulator |
| As1Zr1.ICSD_20291       | metal      | metal     |
| As1Zr1.ICSD_44092       | metal      | metal     |
| As1Zr3.ICSD_611620      | metal      | metal     |
| As1.ICSD_158473         | metal      | metal     |
| As1.ICSD_158474         | metal      | metal     |
| As1.ICSD_609828         | metal      | metal     |
| As1.ICSD_70100          | metal      | metal     |
| As2Au1K5.ICSD_40698     | insulator  | insulator |
| As2B1Cs3.ICSD_300122    | metal      | insulator |
| As2B1K3.ICSD_300105     | insulator  | insulator |
| As2B1Rb3.ICSD_402082    | insulator  | insulator |
| As2B4Cl4.ICSD_80153     | insulator  | insulator |
| As2Ba1Cd2.ICSD_30917    | insulator  | insulator |
| As2Ba1Co2O8.ICSD_260062 | insulator  | insulator |
| As2Ba1Co2.ICSD_609848   | metal      | metal     |
| As2Ba1Cr2.ICSD_609849   | metal      | metal     |
| As2Ba1Cu2.ICSD_609850   | metal      | metal     |
| As2Ba1Cu4.ICSD_89628    | metal      | metal     |
| As2Ba1Cu6.ICSD_79256    | metal      | metal     |
| As2Ba1Fe2.ICSD_180475   | metal      | metal     |
| As2Ba1Fe2.ICSD_180490   | metal      | metal     |
| As2Ba1Fe2.ICSD_182273   | metal      | metal     |
| As2Ba1Fe2.ICSD_188346   | metal      | metal     |
| As2Ba1Fe2.ICSD_189024   | metal      | metal     |
| As2Ba1Ga2.ICSD_380478   | insulator  | insulator |
| As2Ba1Ge2.ICSD_26417    | metal      | insulator |
| As2Ba1Mg2.ICSD_30916    | insulator  | insulator |
| As2Ba1Mn2.ICSD_41794    | metal      | metal     |

Supplementary Table 73. Five-fold cross validated predictions for the metal/insulator classification (65/598).

| system                     | calculated | predicted |
|----------------------------|------------|-----------|
| As2Ba1Ni2O8.ICSD_27014     | insulator  | insulator |
| As2Ba1Ni2.ICSD_164196      | metal      | metal     |
| As2Ba1Ni2.ICSD_185463      | metal      | metal     |
| As2Ba1O1Ti2.ICSD_169074    | metal      | metal     |
| As2Ba1Pd1.ICSD_405110      | metal      | metal     |
| As2Ba1Pd2.ICSD_36376       | metal      | metal     |
| As2Ba1Pd2.ICSD_61196       | metal      | metal     |
| As2Ba1Pt1.ICSD_405112      | metal      | metal     |
| As2Ba1Rh2.ICSD_416983      | metal      | metal     |
| As2Ba1Ru2.ICSD_602110      | metal      | metal     |
| As2Ba1Zn2.ICSD_12146       | insulator  | insulator |
| As2Ba1Zn2.ICSD_417000      | metal      | metal     |
| As2Ba1.ICSD_414139         | insulator  | insulator |
| As2Ba2Cd1.ICSD_422941      | insulator  | metal     |
| As2Ba2Ge1.ICSD_35151       | insulator  | insulator |
| As2Ba2Mn1O2Zn2.ICSD_85659  | metal      | metal     |
| As2Ba2Mn2O1.ICSD_75454     | insulator  | metal     |
| As2Ba2Se5.ICSD_60954       | insulator  | insulator |
| As2Ba2Zn1.ICSD_421423      | insulator  | insulator |
| As2Ba3O8.ICSD_404438       | insulator  | insulator |
| As2Ba4O1.ICSD_33905        | insulator  | insulator |
| As2Be1K4.ICSD_300111       | insulator  | insulator |
| As2Be2Ca1.ICSD_609867      | insulator  | insulator |
| As2Be2Mg1.ICSD_609872      | insulator  | insulator |
| As2Br1La3O7.ICSD_421948    | insulator  | insulator |
| As2Br2Cd2Hg2.ICSD_240354   | insulator  | insulator |
| As2Br3Hg4.ICSD_82312       | insulator  | insulator |
| As2Ca1Cd2.ICSD_100065      | insulator  | insulator |
| As2Ca1Co2.ICSD_609899      | metal      | metal     |
| As2Ca1Cu1O7.ICSD_82623     | insulator  | insulator |
| As2Ca1Cu4.ICSD_32619       | metal      | metal     |
| As2Ca1F20Xe4.ICSD_412759   | insulator  | insulator |
| As2Ca1Fe2.ICSD_166017      | metal      | metal     |
| As2Ca1Fe2.ICSD_182277      | metal      | metal     |
| As2Ca1Fe2.ICSD_182278      | metal      | metal     |
| As2Ca1Ga2.ICSD_422526      | metal      | metal     |
| As2Ca1H4O8.ICSD_2809       | insulator  | insulator |
| As2Ca1H6Mn1O10.ICSD_200702 | insulator  | insulator |
| As2Ca1Mg2.ICSD_100041      | insulator  | insulator |
| As2Ca1Mn2.ICSD_41792       | metal      | metal     |
| As2Ca1Ni2.ICSD_188174      | metal      | metal     |
| As2Ca1O6.ICSD_77379        | insulator  | insulator |
| As2Ca1Pd2.ICSD_604341      | metal      | metal     |
| As2Ca1Ru2.ICSD_609914      | metal      | metal     |
| As2Ca1Zn2.ICSD_609920      | insulator  | insulator |
| As2Ca2Cd1.ICSD_422578      | insulator  | insulator |
| As2Ca2Cd1.ICSD_422579      | insulator  | insulator |
| As2Ca2H4Mn1O10.ICSD_156223 | insulator  | insulator |
| As2Ca2O7.ICSD_32602        | insulator  | insulator |
| As2Ca4O1.ICSD_68203        | insulator  | insulator |

Supplementary Table 74. Five-fold cross validated predictions for the metal/insulator classification (66/598).

| system                     | calculated | predicted |
|----------------------------|------------|-----------|
| As2Cd1Ge1_ICSD_609947      | metal      | metal     |
| As2Cd1Hg4I4_ICSD_416973    | insulator  | insulator |
| As2Cd1K4_ICSD_300190       | insulator  | insulator |
| As2Cd1O6_ICSD_280576       | insulator  | insulator |
| As2Cd1Si1_ICSD_603895      | insulator  | insulator |
| As2Cd1Sn1_ICSD_609982      | metal      | metal     |
| As2Cd1Sr2_ICSD_422940      | insulator  | insulator |
| As2Cd1_ICSD_16037          | insulator  | metal     |
| As2Cd2Eu1_ICSD_422963      | metal      | metal     |
| As2Cd2O7_ICSD_280579       | insulator  | insulator |
| As2Cd2Sr1_ICSD_23249       | insulator  | insulator |
| As2Cd3_ICSD_56167          | metal      | metal     |
| As2Cd3_ICSD_609930         | metal      | metal     |
| As2Cd4I3_ICSD_1964         | insulator  | insulator |
| As2Ce1Co2_ICSD_610002      | metal      | metal     |
| As2Ce1Ir2_ICSD_186993      | metal      | metal     |
| As2Ce1Li2_ICSD_32042       | insulator  | metal     |
| As2Ce1Ni2_ICSD_610005      | metal      | metal     |
| As2Ce1Ni2_ICSD_610006      | metal      | metal     |
| As2Ce1Pd2_ICSD_604354      | metal      | metal     |
| As2Ce1Pd3_ICSD_81775       | metal      | metal     |
| As2Ce1Rh2_ICSD_610012      | metal      | metal     |
| As2Ce1_ICSD_609997         | insulator  | insulator |
| As2Cl13Sb1_ICSD_26088      | insulator  | insulator |
| As2Cl2In2O5_ICSD_422701    | insulator  | insulator |
| As2Cl3F5O1_ICSD_82760      | insulator  | insulator |
| As2Cl3Hg3Ti1_ICSD_411520   | insulator  | insulator |
| As2Cl4F6_ICSD_33884        | insulator  | insulator |
| As2Cl6O2_ICSD_411196       | insulator  | insulator |
| As2Co1O6_ICSD_80350        | insulator  | insulator |
| As2Co1U1_ICSD_90313        | metal      | metal     |
| As2Co1Zr6_ICSD_83932       | metal      | metal     |
| As2Co1_ICSD_610034         | metal      | metal     |
| As2Co1_ICSD_610039         | metal      | metal     |
| As2Co2K1_ICSD_610072       | metal      | metal     |
| As2Co2La1_ICSD_610073      | metal      | metal     |
| As2Co2Nd1_ICSD_610090      | metal      | metal     |
| As2Co2O6Sc2Sr4_ICSD_262356 | metal      | metal     |
| As2Co2O7_ICSD_69001        | insulator  | insulator |
| As2Co2O8Sr1_ICSD_400764    | insulator  | insulator |
| As2Co2Pr1_ICSD_610099      | metal      | metal     |
| As2Co2Sr1_ICSD_610122      | metal      | metal     |
| As2Co2Th1_ICSD_610124      | metal      | metal     |
| As2Co7O12_ICSD_403080      | insulator  | insulator |
| As2Cr1_ICSD_43898          | metal      | metal     |
| As2Cr2Fe2O6Sr4_ICSD_180529 | metal      | metal     |
| As2Cr2Sr1_ICSD_610273      | metal      | metal     |
| As2Cs1Rh2_ICSD_610296      | metal      | metal     |
| As2Cs1Ru2_ICSD_610297      | metal      | metal     |
| As2Cs2F8O2_ICSD_6070       | insulator  | insulator |

Supplementary Table 75. Five-fold cross validated predictions for the metal/insulator classification (67/598).

| system                    | calculated | predicted |
|---------------------------|------------|-----------|
| As2Cs2Pd1_ICSD_69647      | insulator  | insulator |
| As2Cs2Se9Sn1_ICSD_281267  | insulator  | insulator |
| As2Cs2Si1_ICSD_71225      | insulator  | insulator |
| As2Cs2Sn1_ICSD_71226      | insulator  | insulator |
| As2Cs4Te6_ICSD_405235     | insulator  | insulator |
| As2Cu1Dy1_ICSD_412552     | metal      | metal     |
| As2Cu1Er1_ICSD_412553     | metal      | metal     |
| As2Cu1F12O8S4_ICSD_411792 | metal      | insulator |
| As2Cu1Gd1_ICSD_91305      | metal      | metal     |
| As2Cu1H16O20U2_ICSD_97287 | metal      | insulator |
| As2Cu1Ho1_ICSD_94440      | metal      | metal     |
| As2Cu1K5_ICSD_40699       | insulator  | insulator |
| As2Cu1Lu1_ICSD_174358     | metal      | metal     |
| As2Cu1Na4O8_ICSD_63058    | insulator  | insulator |
| As2Cu1O4_ICSD_16829       | metal      | insulator |
| As2Cu1O8Zn2_ICSD_18115    | insulator  | insulator |
| As2Cu1Tb1_ICSD_412551     | metal      | metal     |
| As2Cu1Tm1_ICSD_412554     | metal      | metal     |
| As2Cu1U1_ICSD_601780      | metal      | metal     |
| As2Cu1Y1_ICSD_412550      | metal      | metal     |
| As2Cu1Yb1_ICSD_412193     | metal      | metal     |
| As2Cu1_ICSD_610303        | metal      | metal     |
| As2Cu2O7_ICSD_162061      | insulator  | insulator |
| As2Cu2O7_ICSD_162062      | insulator  | insulator |
| As2Cu2Sr1_ICSD_610366     | metal      | metal     |
| As2Cu2U1_ICSD_601803      | metal      | metal     |
| As2Cu3K3_ICSD_32015       | insulator  | insulator |
| As2Cu3O8_ICSD_201733      | insulator  | insulator |
| As2Cu3O8_ICSD_24198       | insulator  | insulator |
| As2Cu3O8_ICSD_63057       | insulator  | insulator |
| As2Cu4Eu1_ICSD_89627      | metal      | metal     |
| As2Cu4K1_ICSD_59207       | metal      | metal     |
| As2Cu4Sr1_ICSD_89626      | metal      | metal     |
| As2Cu5_ICSD_26253         | metal      | metal     |
| As2Dy1K3S8_ICSD_420737    | insulator  | insulator |
| As2Dy1Ni4_ICSD_68526      | metal      | metal     |
| As2Dy2Ni1_ICSD_610379     | metal      | metal     |
| As2Er1Ni4_ICSD_610390     | metal      | metal     |
| As2Er2Ni1_ICSD_610392     | metal      | metal     |
| As2Eu1Fe2_ICSD_163210     | metal      | metal     |
| As2Eu1Fe2_ICSD_163211     | metal      | metal     |
| As2Eu1Fe2_ICSD_169687     | metal      | metal     |
| As2Eu1Fe2_ICSD_185355     | metal      | metal     |
| As2Eu1Mn2_ICSD_100583     | metal      | metal     |
| As2Eu1Ni2_ICSD_610437     | metal      | metal     |
| As2Eu1Pd2_ICSD_604348     | metal      | metal     |
| As2Eu1Pt2_ICSD_418152     | metal      | metal     |
| As2Eu1Rh2_ICSD_416982     | metal      | metal     |
| As2Eu1Ru2_ICSD_610446     | metal      | metal     |
| As2Eu1Zn2_ICSD_610450     | metal      | insulator |

Supplementary Table 76. Five-fold cross validated predictions for the metal/insulator classification (68/598).

| system                     | calculated | predicted |
|----------------------------|------------|-----------|
| As2Eu2_ICSD_810            | metal      | metal     |
| As2Eu3S8_ICSD_249612       | insulator  | insulator |
| As2Eu4O1_ICSD_1222         | insulator  | insulator |
| As2F12Hg3_ICSD_9323        | insulator  | insulator |
| As2F12Hg4_ICSD_35412       | insulator  | insulator |
| As2F12I4S2_ICSD_14074      | insulator  | insulator |
| As2F12I4_ICSD_37001        | metal      | insulator |
| As2F12Mn1O4S2_ICSD_411791  | insulator  | insulator |
| As2F12Mn1_ICSD_83635       | insulator  | insulator |
| As2F12N2S1Se2_ICSD_71357   | insulator  | insulator |
| As2F12N2S3_ICSD_54159      | insulator  | insulator |
| As2F12N2Se3_ICSD_73584     | insulator  | insulator |
| As2F16Mg1Xe2_ICSD_281694   | insulator  | insulator |
| As2F18Pb1Xe3_ICSD_391093   | insulator  | insulator |
| As2F2O1Sr2Ti2_ICSD_167013  | metal      | insulator |
| As2F7K1_ICSD_36332         | insulator  | insulator |
| As2F8K2O2_ICSD_9027        | insulator  | insulator |
| As2F8O2Rb2_ICSD_9028       | insulator  | insulator |
| As2Fe1Li1O7_ICSD_75180     | insulator  | insulator |
| As2Fe1_ICSD_610471         | metal      | metal     |
| As2Fe2O6Sc2Sr4_ICSD_180528 | metal      | metal     |
| As2Fe2Rb1_ICSD_167329      | metal      | metal     |
| As2Fe2Sr1_ICSD_163208      | metal      | metal     |
| As2Fe2Sr1_ICSD_163869      | metal      | metal     |
| As2Fe4O11_ICSD_100442      | insulator  | insulator |
| As2Ga1K1O7_ICSD_82391      | insulator  | insulator |
| As2Ga1K2Li1_ICSD_401208    | insulator  | insulator |
| As2Ga1K2Na1_ICSD_300129    | insulator  | insulator |
| As2Ga1Li1Na2_ICSD_402111   | insulator  | insulator |
| As2Ga1Li1O7_ICSD_161500    | insulator  | insulator |
| As2Gd1Ni2_ICSD_610591      | metal      | metal     |
| As2Ge1K2_ICSD_71222        | insulator  | insulator |
| As2Ge1Mg1_ICSD_182368      | insulator  | insulator |
| As2Ge1Te4_ICSD_68111       | insulator  | insulator |
| As2Ge1Zn1_ICSD_16735       | metal      | metal     |
| As2Ge1_ICSD_23872          | insulator  | insulator |
| As2Ge2Te5_ICSD_68112       | insulator  | insulator |
| As2Ge3Te6_ICSD_68113       | insulator  | insulator |
| As2Ge4Te7_ICSD_68114       | insulator  | insulator |
| As2Ge5Te8_ICSD_63174       | insulator  | insulator |
| As2H16O16Zn3_ICSD_100492   | insulator  | insulator |
| As2H2K1O8Sc1_ICSD_59820    | insulator  | insulator |
| As2H3Li1O7_ICSD_172988     | insulator  | insulator |
| As2H4O9Ti1_ICSD_86771      | insulator  | insulator |
| As2H4O9V1_ICSD_69585       | insulator  | insulator |
| As2H6O11U1_ICSD_411217     | insulator  | insulator |
| As2H8O12Zn3_ICSD_290615    | insulator  | insulator |
| As2Hf1Ni4_ICSD_610651      | metal      | metal     |
| As2Hf1_ICSD_42916          | metal      | metal     |
| As2Hf1_ICSD_610636         | metal      | metal     |

Supplementary Table 77. Five-fold cross validated predictions for the metal/insulator classification (69/598).

| system                  | calculated | predicted |
|-------------------------|------------|-----------|
| As2Hf3_ICSD_610637      | metal      | metal     |
| As2Hg1K4_ICSD_402573    | insulator  | insulator |
| As2Hg1O6_ICSD_409490    | insulator  | insulator |
| As2Hg2O6_ICSD_411230    | insulator  | insulator |
| As2Hg3O8_ICSD_72527     | insulator  | insulator |
| As2Hg4I3_ICSD_67227     | insulator  | insulator |
| As2Hg4O7_ICSD_391228    | insulator  | insulator |
| As2Hg6O8_ICSD_2604      | insulator  | insulator |
| As2Ho1Ni4_ICSD_610673   | metal      | metal     |
| As2Ho2Ni1_ICSD_68142    | metal      | metal     |
| As2In1K2Li1_ICSD_402147 | insulator  | insulator |
| As2Ir1_ICSD_610739      | insulator  | insulator |
| As2Ir2La1_ICSD_186992   | metal      | metal     |
| As2K2Ni1_ICSD_300120    | insulator  | insulator |
| As2K2Pd1_ICSD_32009     | insulator  | insulator |
| As2K2Pt1_ICSD_610762    | insulator  | insulator |
| As2K2S6Sn1_ICSD_281039  | insulator  | insulator |
| As2K2Si1_ICSD_40426     | insulator  | insulator |
| As2K3La1O8_ICSD_421979  | insulator  | insulator |
| As2K3Nb1O9_ICSD_202980  | insulator  | insulator |
| As2K3Nd1S8_ICSD_240365  | insulator  | insulator |
| As2K4Zn1_ICSD_409919    | insulator  | insulator |
| As2La1Ni2_ICSD_610772   | metal      | metal     |
| As2La1Ni2_ICSD_610773   | metal      | metal     |
| As2La1Pd2_ICSD_604343   | metal      | metal     |
| As2La1Rh2_ICSD_610777   | metal      | metal     |
| As2La1Ru2_ICSD_602111   | metal      | metal     |
| As2La1_ICSD_280294      | insulator  | insulator |
| As2La1_ICSD_610769      | insulator  | insulator |
| As2Li1O7Sc1_ICSD_161499 | insulator  | insulator |
| As2Li2Nd1_ICSD_23261    | metal      | metal     |
| As2Li2Pr1_ICSD_23260    | metal      | metal     |
| As2Li3Nd1_ICSD_49626    | insulator  | metal     |
| As2Lu1Ni4_ICSD_610818   | metal      | metal     |
| As2Mg1Si1_ICSD_182367   | insulator  | insulator |
| As2Mg2O7_ICSD_16885     | insulator  | insulator |
| As2Mg2Sr1_ICSD_610831   | insulator  | insulator |
| As2Mg2Zn1_ICSD_610834   | metal      | insulator |
| As2Mg3_ICSD_24485       | insulator  | insulator |
| As2Mg3_ICSD_25504       | insulator  | insulator |
| As2Mg3_ICSD_610824      | insulator  | insulator |
| As2Mn1O6_ICSD_80351     | insulator  | insulator |
| As2Mn1S5Ti2_ICSD_17035  | insulator  | insulator |
| As2Mn2O7_ICSD_69003     | insulator  | insulator |
| As2Mn2Sr1_ICSD_41793    | metal      | metal     |
| As2Mn2Sr1_ICSD_49020    | metal      | metal     |
| As2Mn2Yb1_ICSD_100585   | metal      | metal     |
| As2Mn2Zn1_ICSD_610947   | metal      | metal     |
| As2Mn3O2Sr2_ICSD_32010  | metal      | metal     |
| As2Mn3_ICSD_73251       | metal      | metal     |

Supplementary Table 78. Five-fold cross validated predictions for the metal/insulator classification (70/598).

| system                     | calculated | predicted |
|----------------------------|------------|-----------|
| As2Mn3.ICSD.75510          | metal      | metal     |
| As2Mo1.ICSD.610950         | metal      | metal     |
| As2Mo2O12Sr1.ICSD.87794    | insulator  | insulator |
| As2Na1O7Sc1.ICSD.161501    | insulator  | insulator |
| As2Na1Sn2.ICSD.82366       | metal      | metal     |
| As2Na1.ICSD.182161         | metal      | insulator |
| As2Na2.ICSD.421420         | insulator  | insulator |
| As2Na4O7.ICSD.2887         | insulator  | insulator |
| As2Na4O9Ti1.ICSD.59321     | insulator  | insulator |
| As2Na4Te4.ICSD.300185      | insulator  | insulator |
| As2Nb1Ni1.ICSD.38412       | metal      | metal     |
| As2Nb1.ICSD.18143          | metal      | metal     |
| As2Nd1Ni2.ICSD.611001      | metal      | metal     |
| As2Nd1Ni2.ICSD.611004      | metal      | metal     |
| As2Nd1Pd2.ICSD.604337      | metal      | metal     |
| As2Nd1Rh2.ICSD.611010      | metal      | metal     |
| As2Nd1.ICSD.1730           | insulator  | insulator |
| As2Ni1O6.ICSD.80349        | insulator  | insulator |
| As2Ni1Tb2.ICSD.611083      | metal      | metal     |
| As2Ni1Tm2.ICSD.96762       | metal      | metal     |
| As2Ni1U1.ICSD.601778       | metal      | metal     |
| As2Ni1Zr2.ICSD.68141       | metal      | metal     |
| As2Ni1.ICSD.34851          | metal      | metal     |
| As2Ni1.ICSD.611031         | metal      | metal     |
| As2Ni1.ICSD.76940          | metal      | metal     |
| As2Ni2O6Sc2Sr4.ICSD.180270 | metal      | metal     |
| As2Ni2O7.ICSD.69002        | insulator  | insulator |
| As2Ni2Pr1.ICSD.611047      | metal      | metal     |
| As2Ni2Pr1.ICSD.611048      | metal      | metal     |
| As2Ni2Sr1.ICSD.611078      | metal      | metal     |
| As2Ni2U1.ICSD.611092       | metal      | metal     |
| As2Ni3O8.ICSD.63708        | insulator  | insulator |
| As2Ni3O8.ICSD.63709        | insulator  | insulator |
| As2Ni4Sc1.ICSD.611064      | metal      | metal     |
| As2Ni4Tb1.ICSD.611081      | metal      | metal     |
| As2Ni4Y1.ICSD.611100       | metal      | metal     |
| As2Ni4Yb1.ICSD.611105      | metal      | metal     |
| As2Ni4Zr1.ICSD.611111      | metal      | metal     |
| As2Ni5.ICSD.42681          | metal      | metal     |
| As2O11W2.ICSD.15020        | insulator  | insulator |
| As2O12S3.ICSD.32586        | insulator  | insulator |
| As2O13Pb8.ICSD.99432       | insulator  | insulator |
| As2O13V4.ICSD.60781        | insulator  | insulator |
| As2O14Pb3Te1Zn3.ICSD.85574 | insulator  | insulator |
| As2O1Sr4.ICSD.33904        | insulator  | insulator |
| As2O1Yb4.ICSD.402951       | insulator  | metal     |
| As2O3.ICSD.100434          | insulator  | insulator |
| As2O3.ICSD.183097          | metal      | insulator |
| As2O3.ICSD.27588           | insulator  | insulator |
| As2O3.ICSD.409611          | insulator  | insulator |

Supplementary Table 79. Five-fold cross validated predictions for the metal/insulator classification (71/598).

| system                 | calculated | predicted |
|------------------------|------------|-----------|
| As2O4Pb1.ICSD.65027    | insulator  | insulator |
| As2O4Zn1.ICSD.202249   | insulator  | insulator |
| As2O4.ICSD.10436       | insulator  | insulator |
| As2O5.ICSD.10015       | insulator  | insulator |
| As2O5.ICSD.987         | insulator  | insulator |
| As2O6Pb1.ICSD.81063    | insulator  | insulator |
| As2O6Pd1.ICSD.187098   | insulator  | insulator |
| As2O6S1.ICSD.4297      | insulator  | insulator |
| As2O6Sr1.ICSD.420296   | insulator  | insulator |
| As2O6Sr1.ICSD.420297   | insulator  | insulator |
| As2O6Zn3.ICSD.10400    | insulator  | insulator |
| As2O6Zn3.ICSD.417004   | insulator  | insulator |
| As2O7Ti1.ICSD.73476    | insulator  | insulator |
| As2O7Ti1.ICSD.73477    | insulator  | insulator |
| As2O8Pb3.ICSD.200414   | insulator  | insulator |
| As2O8Sr3.ICSD.420295   | insulator  | insulator |
| As2O8Zn3.ICSD.404199   | insulator  | insulator |
| As2O8Zn3.ICSD.404229   | insulator  | insulator |
| As2O9S2.ICSD.63530     | insulator  | insulator |
| As2O9V3.ICSD.424067    | insulator  | insulator |
| As2Os1.ICSD.611138     | insulator  | insulator |
| As2P2S7.ICSD.30706     | insulator  | insulator |
| As2Pa1.ICSD.611160     | metal      | metal     |
| As2Pd1.ICSD.43101      | metal      | metal     |
| As2Pd2Pr1.ICSD.604345  | metal      | metal     |
| As2Pd2Sm1.ICSD.604347  | metal      | metal     |
| As2Pd2Sr1.ICSD.36374   | metal      | metal     |
| As2Pr1.ICSD.611219     | insulator  | insulator |
| As2Pt1Rh2.ICSD.107529  | insulator  | insulator |
| As2Pt1.ICSD.38428      | insulator  | metal     |
| As2Pt2Sr1.ICSD.181396  | metal      | metal     |
| As2Pt2Sr1.ICSD.418156  | metal      | metal     |
| As2Rb2Si1.ICSD.60617   | insulator  | insulator |
| As2Rb2Sn1.ICSD.71223   | insulator  | insulator |
| As2Rh1.ICSD.42616      | insulator  | metal     |
| As2Rh2Sr1.ICSD.417001  | metal      | metal     |
| As2Rh2Sr1.ICSD.417002  | metal      | metal     |
| As2Ru1.ICSD.611289     | insulator  | insulator |
| As2Ru2Sr1.ICSD.602109  | metal      | metal     |
| As2S3.ICSD.185819      | insulator  | insulator |
| As2S6Sn1Ti2.ICSD.72907 | insulator  | insulator |
| As2Sc3.ICSD.16411      | metal      | metal     |
| As2Sc3.ICSD.611355     | metal      | metal     |
| As2Se3.ICSD.2600       | insulator  | insulator |
| As2Se3.ICSD.611373     | insulator  | insulator |
| As2Si1Zn1.ICSD.23707   | insulator  | insulator |
| As2Si1.ICSD.24801      | metal      | metal     |
| As2Si1.ICSD.611405     | insulator  | insulator |
| As2Sn1Zn1.ICSD.43357   | metal      | metal     |
| As2Sn2Sr1.ICSD.82371   | metal      | metal     |

Supplementary Table 80. Five-fold cross validated predictions for the metal/insulator classification (72/598).

| system                     | calculated | predicted |
|----------------------------|------------|-----------|
| As2Sr1Zn2.ICSD_23248       | insulator  | insulator |
| As2Ta1.ICSD_107966         | metal      | metal     |
| As2Te3.ICSD_30981          | insulator  | insulator |
| As2Te3.ICSD_41040          | insulator  | insulator |
| As2Te3.ICSD_68110          | insulator  | insulator |
| As2Th1.ICSD_611488         | metal      | metal     |
| As2Ti1.ICSD_611500         | metal      | metal     |
| As2U1.ICSD_611529          | metal      | metal     |
| As2U1.ICSD_611531          | metal      | metal     |
| As2V1.ICSD_611574          | metal      | metal     |
| As2V3.ICSD_999             | metal      | metal     |
| As2W1.ICSD_611576          | metal      | metal     |
| As2Yb1Zn2.ICSD_88231       | insulator  | metal     |
| As2Zn1.ICSD_2021           | insulator  | insulator |
| As2Zn3.ICSD_24486          | metal      | metal     |
| As2Zn3.ICSD_611595         | metal      | metal     |
| As2Zn3.ICSD_611608         | insulator  | metal     |
| As2Zr1.ICSD_168665         | metal      | metal     |
| As2Zr1.ICSD_20292          | metal      | metal     |
| As2Zr3.ICSD_611611         | metal      | metal     |
| As3Ba1.ICSD_86402          | metal      | metal     |
| As3Ba2Cd2.ICSD_420833      | metal      | metal     |
| As3Ba3In1.ICSD_402338      | insulator  | insulator |
| As3Ba3Nb1O1.ICSD_408853    | insulator  | insulator |
| As3Ba3O1Ta1.ICSD_280155    | insulator  | insulator |
| As3Ba5Cl1O12.ICSD_260065   | insulator  | insulator |
| As3Ba5.ICSD_43872          | metal      | metal     |
| As3Be3Cl1Li4O12.ICSD_74526 | insulator  | insulator |
| As3Bi2K3O12.ICSD_59887     | insulator  | insulator |
| As3Br1Cd2.ICSD_100815      | insulator  | insulator |
| As3Br1Cd2.ICSD_75170       | insulator  | insulator |
| As3Br1Hg2.ICSD_75169       | insulator  | insulator |
| As3C1V5.ICSD_609885        | metal      | metal     |
| As3Ca1Fe4.ICSD_260320      | metal      | metal     |
| As3Ca1Fe4.ICSD_260323      | metal      | metal     |
| As3Ca1.ICSD_193            | metal      | metal     |
| As3Ca2.ICSD_43876          | insulator  | insulator |
| As3Ca3Ga1.ICSD_60126       | insulator  | insulator |
| As3Ca5F1O12.ICSD_172996    | insulator  | insulator |
| As3Ca5.ICSD_609889         | metal      | insulator |
| As3Cd2I1.ICSD_40449        | insulator  | insulator |
| As3Cd2I1.ICSD_8216         | insulator  | insulator |
| As3Cd4K1.ICSD_262032       | metal      | metal     |
| As3Cd4Rb1.ICSD_262037      | metal      | metal     |
| As3Ce4.ICSD_43883          | metal      | metal     |
| As3Cl1O12Pb5.ICSD_69960    | insulator  | insulator |
| As3Cl1O12Sr5.ICSD_260196   | insulator  | insulator |
| As3Cl1O9Pb5.ICSD_100168    | insulator  | insulator |
| As3Cl1O9Pb5.ICSD_31863     | insulator  | insulator |
| As3Co1Hf5.ICSD_85884       | metal      | metal     |

Supplementary Table 81. Five-fold cross validated predictions for the metal/insulator classification (73/598).

| system                   | calculated | predicted |
|--------------------------|------------|-----------|
| As3Co1.ICSD_34051        | metal      | metal     |
| As3Cr2Na3O12.ICSD_280946 | metal      | insulator |
| As3Cr4.ICSD_66761        | metal      | metal     |
| As3Cs1Zn4.ICSD_262030    | metal      | insulator |
| As3Cs5Ge1.ICSD_65718     | metal      | insulator |
| As3Cs5Si1.ICSD_65716     | insulator  | metal     |
| As3Cs6In1.ICSD_300145    | insulator  | insulator |
| As3Cu13S16V1.ICSD_610353 | metal      | insulator |
| As3Cu2O1U2.ICSD_75132    | metal      | metal     |
| As3Cu4K1O12.ICSD_63059   | insulator  | insulator |
| As3Eu1Ni5.ICSD_33916     | metal      | metal     |
| As3Eu1.ICSD_86401        | metal      | metal     |
| As3Eu4.ICSD_10440        | metal      | metal     |
| As3Eu5.ICSD_2250         | metal      | metal     |
| As3F1O12Sr5.ICSD_260044  | insulator  | insulator |
| As3F6Sb1Se4.ICSD_24413   | insulator  | insulator |
| As3H1Sr5.ICSD_173027     | insulator  | metal     |
| As3H2Na1O9.ICSD_65011    | insulator  | insulator |
| As3H5O10.ICSD_14327      | insulator  | insulator |
| As3Hf1Na5.ICSD_66026     | insulator  | insulator |
| As3Hg1S6Ti1.ICSD_38363   | insulator  | insulator |
| As3Ir1.ICSD_15457        | metal      | metal     |
| As3K5O10.ICSD_23302      | insulator  | insulator |
| As3K6Nb1O1.ICSD_409630   | insulator  | insulator |
| As3La1Si1.ICSD_68204     | metal      | insulator |
| As3La1Zn3.ICSD_261981    | insulator  | metal     |
| As3La4.ICSD_610771       | metal      | metal     |
| As3Mg4Na1O12.ICSD_59888  | insulator  | insulator |
| As3Mn4.ICSD_80375        | metal      | metal     |
| As3Mo2.ICSD_41015        | metal      | metal     |
| As3Na1O12Ti2.ICSD_421531 | insulator  | insulator |
| As3Na1O12Zr2.ICSD_97956  | insulator  | insulator |
| As3Na1Zn4.ICSD_262036    | insulator  | metal     |
| As3Na5Sn1.ICSD_656058    | insulator  | insulator |
| As3Nb4.ICSD_15032        | metal      | metal     |
| As3Nb5.ICSD_16417        | metal      | metal     |
| As3Ni5Sr1.ICSD_33915     | metal      | metal     |
| As3O1Sr3Ta1.ICSD_409567  | insulator  | insulator |
| As3Pr4.ICSD_611220       | metal      | metal     |
| As3Rb1Zn4.ICSD_262038    | insulator  | metal     |
| As3Rb5Si1.ICSD_300191    | insulator  | insulator |
| As3Rh1.ICSD_611268       | metal      | metal     |
| As3Sc5.ICSD_41677        | metal      | metal     |
| As3Sn4.ICSD_611426       | metal      | metal     |
| As3Sr1.ICSD_41831        | metal      | metal     |
| As3Sr2Zn2.ICSD_262413    | insulator  | insulator |
| As3Sr4.ICSD_402110       | insulator  | insulator |
| As3Sr5.ICSD_44067        | metal      | metal     |
| As3Ti4.ICSD_611492       | metal      | metal     |
| As3Ti5.ICSD_611496       | metal      | metal     |

Supplementary Table 82. Five-fold cross validated predictions for the metal/insulator classification (74/598).

| system                     | calculated | predicted |
|----------------------------|------------|-----------|
| As3Ti5_ICSD_611507         | metal      | metal     |
| As3V4_ICSD_15049           | metal      | metal     |
| As3V4_ICSD_23787           | metal      | metal     |
| As3V5_ICSD_611571          | metal      | metal     |
| As3W2_ICSD_43185           | metal      | metal     |
| As3Yb4_ICSD_153669         | metal      | metal     |
| As3Yb4_ICSD_42685          | metal      | metal     |
| As4Ba1Cu8_ICSD_66017       | metal      | metal     |
| As4Ba3Cd2_ICSD_424761      | metal      | metal     |
| As4Ba3Li4_ICSD_280027      | metal      | metal     |
| As4Ba3Si2_ICSD_41183       | insulator  | insulator |
| As4Ba3Sn2_ICSD_30702       | insulator  | insulator |
| As4Ba3Zn2_ICSD_424760      | metal      | metal     |
| As4Ba4Si1_ICSD_26467       | insulator  | insulator |
| As4Ba4Ti1_ICSD_380115      | insulator  | insulator |
| As4Bi1Cl7Hg6_ICSD_411204   | insulator  | insulator |
| As4Br16Ga4Hg11_ICSD_411676 | insulator  | insulator |
| As4Br1K1O6_ICSD_65206      | insulator  | insulator |
| As4Br6Cd1Hg6_ICSD_417039   | insulator  | insulator |
| As4Br7Cr1Hg6_ICSD_411481   | insulator  | insulator |
| As4Br7Hg6Ti1_ICSD_411239   | insulator  | insulator |
| As4Br7Hg6Yb1_ICSD_413988   | metal      | insulator |
| As4C3_ICSD_163831          | metal      | insulator |
| As4C4F12_ICSD_9071         | insulator  | insulator |
| As4Ca1Na2O12_ICSD_409335   | insulator  | insulator |
| As4Ca1Rh6_ICSD_89612       | metal      | metal     |
| As4Ca3Ge2_ICSD_16455       | insulator  | insulator |
| As4Ca3In2_ICSD_61336       | insulator  | insulator |
| As4Ca3Si2_ICSD_16456       | insulator  | insulator |
| As4Ca5H10O20_ICSD_21068    | insulator  | insulator |
| As4Cd2Ge1_ICSD_42132       | insulator  | insulator |
| As4Cd5Rb2_ICSD_290262      | metal      | insulator |
| As4Cl1Cu1S3_ICSD_419754    | insulator  | insulator |
| As4Cl1K1O6_ICSD_65205      | insulator  | insulator |
| As4Cl2Cu2S3_ICSD_419755    | insulator  | insulator |
| As4Cl7Hg6In1_ICSD_411820   | insulator  | insulator |
| As4Cl7Hg6Mo1_ICSD_411240   | insulator  | insulator |
| As4Cl7Hg6Ti1_ICSD_411238   | insulator  | insulator |
| As4Cs1F13_ICSD_281641      | insulator  | insulator |
| As4Cs4Se8_ICSD_171373      | insulator  | insulator |
| As4Cu12S12_ICSD_33588      | metal      | metal     |
| As4Cu12S13_ICSD_26724      | metal      | metal     |
| As4Cu3K2O12_ICSD_65416     | insulator  | insulator |
| As4Cu3_ICSD_41169          | metal      | metal     |
| As4Cu6Hg3S12_ICSD_169803   | insulator  | insulator |
| As4Eu3Pd4_ICSD_79094       | metal      | metal     |
| As4Eu3_ICSD_8211           | insulator  | metal     |
| As4Ga1Na3Sr3_ICSD_402286   | insulator  | insulator |
| As4Ge1Sr4_ICSD_610619      | insulator  | insulator |
| As4Ge1Te7_ICSD_41107       | insulator  | insulator |

Supplementary Table 83. Five-fold cross validated predictions for the metal/insulator classification (75/598).

| system                   | calculated | predicted |
|--------------------------|------------|-----------|
| As4Ge2Sr3_ICSD_16454     | insulator  | insulator |
| As4Ge3_ICSD_163833       | metal      | metal     |
| As4Hf7_ICSD_610634       | metal      | metal     |
| As4I1K1O6_ICSD_16889     | insulator  | insulator |
| As4K7Nb1_ICSD_380109     | insulator  | insulator |
| As4K7Ta1_ICSD_380110     | insulator  | insulator |
| As4Mg1Rh6_ICSD_89611     | metal      | metal     |
| As4Mg1_ICSD_1079         | insulator  | insulator |
| As4Mn5_ICSD_73252        | metal      | metal     |
| As4Mo5_ICSD_43187        | metal      | metal     |
| As4Mo5_ICSD_610956       | metal      | metal     |
| As4Na2O11_ICSD_62963     | insulator  | insulator |
| As4Na5_ICSD_182165       | metal      | insulator |
| As4Na8Ti1_ICSD_73310     | insulator  | insulator |
| As4Nb1Rb7_ICSD_380111    | insulator  | insulator |
| As4Nb5Pd4_ICSD_412866    | metal      | metal     |
| As4Nb7_ICSD_610986       | metal      | metal     |
| As4Pa3_ICSD_9818         | metal      | metal     |
| As4Pb9S15_ICSD_18097     | insulator  | insulator |
| As4Rb5Ta1Ti2_ICSD_85784  | insulator  | insulator |
| As4Rh6Sr1_ICSD_89613     | metal      | metal     |
| As4Rh6Yb1_ICSD_89614     | metal      | metal     |
| As4S3_ICSD_188058        | insulator  | insulator |
| As4S4_ICSD_187210        | insulator  | insulator |
| As4S5_ICSD_16107         | insulator  | insulator |
| As4Se3_ICSD_611376       | insulator  | insulator |
| As4Se4_ICSD_2056         | insulator  | insulator |
| As4Se4_ICSD_2599         | insulator  | insulator |
| As4Si1Sr4_ICSD_611409    | insulator  | insulator |
| As4Si2Sr3_ICSD_16453     | insulator  | insulator |
| As4Sn3_ICSD_163834       | insulator  | metal     |
| As4Sr3_ICSD_100110       | insulator  | metal     |
| As4Sr4Ti1_ICSD_380113    | insulator  | insulator |
| As4Ta5_ICSD_36525        | metal      | metal     |
| As4Th3_ICSD_611484       | metal      | metal     |
| As4U3_ICSD_611525        | metal      | metal     |
| As4Zr7_ICSD_611614       | metal      | metal     |
| As5B1O20Pb6_ICSD_404329  | insulator  | insulator |
| As5Ba1Ni9_ICSD_33919     | metal      | metal     |
| As5Cs3O9_ICSD_413151     | insulator  | insulator |
| As5I1Te7_ICSD_31877      | insulator  | insulator |
| As5K6Sn3_ICSD_71009      | insulator  | insulator |
| As6Ba1Pt4_ICSD_62519     | insulator  | insulator |
| As6Bi1K3Se12_ICSD_180763 | insulator  | insulator |
| As6Ca5Ga2_ICSD_27        | metal      | insulator |
| As6Ca5Sn2_ICSD_61037     | insulator  | insulator |
| As6Cs4_ICSD_409382       | insulator  | insulator |
| As6Cu7Se13_ICSD_15235    | metal      | insulator |
| As6Ge2Na10_ICSD_300187   | metal      | insulator |
| As6Ir7Mg4_ICSD_94393     | metal      | metal     |

Supplementary Table 84. Five-fold cross validated predictions for the metal/insulator classification (76/598).

| system                         | calculated | predicted |
|--------------------------------|------------|-----------|
| As6Mg4Rh7_ICSD_94391           | metal      | metal     |
| As6Na10Si2_ICSD_300188         | metal      | insulator |
| As6Na10Sn2_ICSD_40559          | insulator  | insulator |
| As6Pt4Sr1_ICSD_62518           | insulator  | insulator |
| As6Rb4_ICSD_409381             | insulator  | insulator |
| As6Rh7Yb4_ICSD_94392           | metal      | metal     |
| As6Ru7U4_ICSD_90326            | metal      | metal     |
| As6Sn2Sr5_ICSD_262646          | metal      | insulator |
| As7Ca4Ir8_ICSD_413846          | metal      | metal     |
| As7Ce2Ni12_ICSD_610004         | metal      | metal     |
| As7Dy2Ni12_ICSD_610376         | metal      | metal     |
| As7Er2Ni12_ICSD_610389         | metal      | metal     |
| As7Ho2Ni12_ICSD_610672         | metal      | metal     |
| As7K2Ni12_ICSD_300138          | metal      | metal     |
| As7Mg6Ni16_ICSD_78834          | metal      | metal     |
| As7Mn6Ni16_ICSD_83742          | metal      | metal     |
| As7Ni12Tb2_ICSD_611080         | metal      | metal     |
| As7Ni12U2_ICSD_93169           | metal      | metal     |
| As7Ni12Y2_ICSD_611099          | metal      | metal     |
| As7Re3_ICSD_611260             | metal      | metal     |
| As8Ge38I8_ICSD_22033           | insulator  | insulator |
| As8Ni11_ICSD_164878            | metal      | metal     |
| As8Ni11_ICSD_34853             | metal      | metal     |
| As8S9_ICSD_98792               | insulator  | insulator |
| Au0.17Gd0.17Sn0.17_ICSD_240884 | metal      | metal     |
| Au1.01Cd0.99_ICSD_106276       | metal      | metal     |
| Au10Ca4In3_ICSD_249601         | metal      | metal     |
| Au10In3_ICSD_612020            | metal      | metal     |
| Au1B2_ICSD_52699               | metal      | metal     |
| Au1Ba1Bi1_ICSD_106269          | metal      | metal     |
| Au1Ba1Gd1Se3_ICSD_88718        | insulator  | insulator |
| Au1Ba1P1_ICSD_420340           | metal      | metal     |
| Au1Ba1Sb1_ICSD_106270          | metal      | metal     |
| Au1Ba1Sb1_ICSD_280954          | metal      | metal     |
| Au1Ba1_ICSD_419559             | metal      | metal     |
| Au1Ba2Ti7_ICSD_98964           | metal      | metal     |
| Au1Ba4C4K1O4_ICSD_40854        | insulator  | insulator |
| Au1Ba4Na1O8_ICSD_73189         | insulator  | insulator |
| Au1Be12_ICSD_109312            | metal      | metal     |
| Au1Be1_ICSD_58396              | metal      | metal     |
| Au1Be5_ICSD_58397              | metal      | metal     |
| Au1Bi1Ca1_ICSD_58399           | metal      | metal     |
| Au1Bi1Eu1_ICSD_611652          | metal      | metal     |
| Au1Bi1K2_ICSD_380341           | insulator  | insulator |
| Au1Bi1Li2_ICSD_261786          | insulator  | metal     |
| Au1Bi1Li2_ICSD_58400           | metal      | metal     |
| Au1Bi1Na2_ICSD_261788          | insulator  | insulator |
| Au1Bi1Sr1_ICSD_106271          | metal      | metal     |
| Au1Bi1Yb1_ICSD_106272          | metal      | metal     |
| Au1Bi1Yb1_ICSD_611656          | metal      | metal     |

Supplementary Table 85. Five-fold cross validated predictions for the metal/insulator classification (77/598).

| system                     | calculated | predicted |
|----------------------------|------------|-----------|
| Au1Bi2O5_ICSD_82092        | metal      | insulator |
| Au1Bi5Na2O11_ICSD_164986   | insulator  | insulator |
| Au1Br1C2H8N4S2_ICSD_72684  | insulator  | insulator |
| Au1Br1F6_ICSD_93481        | insulator  | insulator |
| Au1Br1Se1_ICSD_2897        | insulator  | insulator |
| Au1Br1_ICSD_200286         | insulator  | insulator |
| Au1Br1_ICSD_200287         | insulator  | insulator |
| Au1Br4K1_ICSD_280033       | insulator  | insulator |
| Au1Br8Te1_ICSD_63129       | insulator  | insulator |
| Au1C1Cl1O1_ICSD_33526      | insulator  | insulator |
| Au1C1Cl3S2_ICSD_63379      | insulator  | insulator |
| Au1C1N1_ICSD_165175        | insulator  | insulator |
| Au1C1_ICSD_169406          | metal      | metal     |
| Au1C2Cl1H3N1_ICSD_152108   | insulator  | insulator |
| Au1C2Cl1H8N4S2_ICSD_170718 | insulator  | insulator |
| Au1C2Cs1_ICSD_411251       | insulator  | insulator |
| Au1C2K1N2S2_ICSD_159001    | insulator  | insulator |
| Au1C2K1N2_ICSD_26498       | insulator  | insulator |
| Au1C2K1_ICSD_411255        | insulator  | insulator |
| Au1C2Li1_ICSD_411253       | insulator  | insulator |
| Au1C2N2Rb1S2_ICSD_159002   | insulator  | insulator |
| Au1C2N2Rb1_ICSD_66037      | insulator  | insulator |
| Au1C2Na1_ICSD_411254       | insulator  | insulator |
| Au1C2Rb1_ICSD_411252       | insulator  | insulator |
| Au1C4H12N1_ICSD_110302     | insulator  | insulator |
| Au1C4H2K1N4O1_ICSD_16043   | insulator  | insulator |
| Au1Ca1Cd1_ICSD_420574      | metal      | metal     |
| Au1Ca1Ga1_ICSD_106273      | metal      | metal     |
| Au1Ca1Ge1_ICSD_85836       | metal      | metal     |
| Au1Ca1In1_ICSD_408579      | metal      | metal     |
| Au1Ca1In2_ICSD_408882      | metal      | metal     |
| Au1Ca1P1_ICSD_52661        | metal      | metal     |
| Au1Ca1Sb1_ICSD_52662       | metal      | metal     |
| Au1Ca1_ICSD_54978          | metal      | metal     |
| Au1Ca2N1_ICSD_85528        | metal      | metal     |
| Au1Ca3N1_ICSD_72942        | metal      | metal     |
| Au1Ca3_ICSD_58401          | metal      | metal     |
| Au1Cd1Ce1_ICSD_411542      | metal      | metal     |
| Au1Cd1Eu1_ICSD_411544      | metal      | metal     |
| Au1Cd1La1_ICSD_411543      | metal      | metal     |
| Au1Cd1Sb1_ICSD_52663       | metal      | metal     |
| Au1Cd1Yb1_ICSD_411545      | metal      | metal     |
| Au1Cd1_ICSD_58408          | metal      | metal     |
| Au1Cd1_ICSD_58409          | metal      | metal     |
| Au1Cd1_ICSD_58410          | metal      | metal     |
| Au1Cd3_ICSD_58411          | metal      | metal     |
| Au1Ce1Cu5_ICSD_107971      | metal      | metal     |
| Au1Ce1Ge1_ICSD_154287      | metal      | metal     |
| Au1Ce1Ge1_ICSD_245768      | metal      | metal     |
| Au1Ce1Ge1_ICSD_57176       | metal      | metal     |

Supplementary Table 86. Five-fold cross validated predictions for the metal/insulator classification (78/598).

| system                 | calculated | predicted |
|------------------------|------------|-----------|
| Au1Ce1In1.ICSD_58421   | metal      | metal     |
| Au1Ce1Pb1.ICSD_611722  | metal      | metal     |
| Au1Ce1Sb1.ICSD_603059  | metal      | metal     |
| Au1Ce1Sb2.ICSD_658239  | metal      | metal     |
| Au1Ce1Sn1.ICSD_411539  | metal      | metal     |
| Au1Ce1Sn1.ICSD_611730  | metal      | metal     |
| Au1Ce1Zn1.ICSD_418712  | metal      | metal     |
| Au1Ce1.ICSD_611709     | metal      | metal     |
| Au1Ce1.ICSD_611711     | metal      | metal     |
| Au1Ce2P3.ICSD_411550   | metal      | metal     |
| Au1Ce2.ICSD_611710     | metal      | metal     |
| Au1Cl1F3P1.ICSD_415842 | insulator  | insulator |
| Au1Cl1O1.ICSD_8190     | insulator  | insulator |
| Au1Cl1Te2.ICSD_16324   | metal      | insulator |
| Au1Cl1.ICSD_6052       | insulator  | insulator |
| Au1Cl3Cs1.ICSD_56472   | metal      | insulator |
| Au1Cl3.ICSD_22146      | insulator  | insulator |
| Au1Cl4Cs1.ICSD_423233  | insulator  | insulator |
| Au1Cl4K1.ICSD_73080    | insulator  | insulator |
| Au1Cl4N5S5.ICSD_61254  | insulator  | insulator |
| Au1Cl4P1.ICSD_15565    | insulator  | insulator |
| Au1Cl4Rb1.ICSD_26021   | insulator  | insulator |
| Au1Cl4Tl1.ICSD_62107   | insulator  | insulator |
| Au1Cl5S1.ICSD_39532    | insulator  | insulator |
| Au1Cl7S1.ICSD_62908    | insulator  | insulator |
| Au1Cl7Se1.ICSD_62511   | insulator  | insulator |
| Au1Cl7Te1.ICSD_61350   | insulator  | insulator |
| Au1Cl8P1.ICSD_62236    | insulator  | insulator |
| Au1Co1Na4O5.ICSD_36661 | insulator  | insulator |
| Au1Cr1S2.ICSD_88852    | insulator  | metal     |
| Au1Cr1Te4.ICSD_150279  | metal      | metal     |
| Au1Cr3O8.ICSD_155508   | insulator  | insulator |
| Au1Cs1F4.ICSD_152056   | insulator  | insulator |
| Au1Cs1K2O2.ICSD_62064  | insulator  | insulator |
| Au1Cs1N12.ICSD_416487  | insulator  | insulator |
| Au1Cs1O1.ICSD_409553   | insulator  | insulator |
| Au1Cs1Se3.ICSD_84002   | insulator  | insulator |
| Au1Cs1Te1.ICSD_71653   | insulator  | insulator |
| Au1Cs1.ICSD_150971     | insulator  | insulator |
| Au1Cs3Ge4.ICSD_413725  | insulator  | insulator |
| Au1Cs3Pb4.ICSD_107448  | insulator  | insulator |
| Au1Cu1F5.ICSD_62544    | metal      | insulator |
| Au1Cu1Se4.ICSD_93052   | metal      | metal     |
| Au1Cu1Sn1.ICSD_611768  | metal      | metal     |
| Au1Cu1Zn2.ICSD_150571  | metal      | metal     |
| Au1Cu1.ICSD_42575      | metal      | metal     |
| Au1Cu3.ICSD_150666     | metal      | metal     |
| Au1Cu4Dy1.ICSD_611752  | metal      | metal     |
| Au1Cu4Er1.ICSD_611753  | metal      | metal     |
| Au1Cu4Ho1.ICSD_611759  | metal      | metal     |

Supplementary Table 87. Five-fold cross validated predictions for the metal/insulator classification (79/598).

| system                   | calculated | predicted |
|--------------------------|------------|-----------|
| Au1Cu4Tb1.ICSD_611769    | metal      | metal     |
| Au1Cu4U1.ICSD_611772     | metal      | metal     |
| Au1Cu4Yb1.ICSD_611773    | metal      | metal     |
| Au1Dy1Ge1.ICSD_106279    | metal      | metal     |
| Au1Dy1In1.ICSD_54951     | metal      | metal     |
| Au1Dy1Ni4.ICSD_611799    | metal      | metal     |
| Au1Dy1Pb1.ICSD_58443     | metal      | metal     |
| Au1Dy1Sn1.ICSD_55000     | metal      | metal     |
| Au1Dy1Sn1.ICSD_611806    | metal      | metal     |
| Au1Dy1.ICSD_58439        | metal      | metal     |
| Au1Dy1.ICSD_611786       | metal      | metal     |
| Au1Dy2.ICSD_611788       | metal      | metal     |
| Au1Er1Ge1.ICSD_107984    | metal      | metal     |
| Au1Er1In1.ICSD_165161    | metal      | metal     |
| Au1Er1Ni4.ICSD_611829    | metal      | metal     |
| Au1Er1Pb1.ICSD_58450     | metal      | metal     |
| Au1Er1Sn1.ICSD_245759    | metal      | metal     |
| Au1Er1Sn1.ICSD_58451     | metal      | metal     |
| Au1Er1.ICSD_58444        | metal      | metal     |
| Au1Er1.ICSD_611819       | metal      | metal     |
| Au1Er2.ICSD_611816       | metal      | metal     |
| Au1Eu1Ge1.ICSD_80270     | metal      | metal     |
| Au1Eu1In1.ICSD_404043    | metal      | metal     |
| Au1Eu1P1.ICSD_52664      | metal      | metal     |
| Au1Eu1Sb1.ICSD_422622    | metal      | metal     |
| Au1Eu1Zn1.ICSD_420674    | metal      | metal     |
| Au1Eu1.ICSD_611844       | metal      | metal     |
| Au1Eu3O6.ICSD_411503     | insulator  | insulator |
| Au1F11Th2.ICSD_89619     | insulator  | insulator |
| Au1F11U2.ICSD_152058     | insulator  | insulator |
| Au1F12Sb2Xe2.ICSD_412106 | insulator  | insulator |
| Au1F16H4Sb2.ICSD_412237  | metal      | insulator |
| Au1F3.ICSD_16876         | insulator  | insulator |
| Au1F4K1.ICSD_9906        | insulator  | insulator |
| Au1F4Li1.ICSD_33953      | insulator  | insulator |
| Au1F4Li1.ICSD_9908       | insulator  | insulator |
| Au1F4Na1.ICSD_9905       | insulator  | insulator |
| Au1F4Rb1.ICSD_9907       | insulator  | insulator |
| Au1F6K1.ICSD_415874      | insulator  | insulator |
| Au1F6Li1.ICSD_165209     | insulator  | insulator |
| Au1F6O2.ICSD_171655      | insulator  | insulator |
| Au1F6Ti1.ICSD_95770      | insulator  | insulator |
| Au1Ga1Hf1.ICSD_156265    | metal      | metal     |
| Au1Ga1Li2.ICSD_58461     | metal      | metal     |
| Au1Ga1O2.ICSD_95666      | insulator  | insulator |
| Au1Ga1Zr1.ICSD_156264    | metal      | metal     |
| Au1Ga1.ICSD_611867       | metal      | metal     |
| Au1Ga2.ICSD_188888       | metal      | metal     |
| Au1Ga2.ICSD_611874       | metal      | metal     |
| Au1Gd1Ge1.ICSD_656872    | metal      | metal     |

Supplementary Table 88. Five-fold cross validated predictions for the metal/insulator classification (80/598).

| system                   | calculated | predicted |
|--------------------------|------------|-----------|
| Au1Gd1In1.ICSD_104011    | metal      | metal     |
| Au1Gd1Mg1.ICSD_413335    | metal      | metal     |
| Au1Gd1Pb1.ICSD_58467     | metal      | metal     |
| Au1Gd1Sn1.ICSD_245762    | metal      | metal     |
| Au1Gd1.ICSD_611906       | metal      | metal     |
| Au1Gd1.ICSD_611908       | metal      | metal     |
| Au1Gd2.ICSD_611913       | metal      | metal     |
| Au1Gd3O6.ICSD_411500     | insulator  | insulator |
| Au1Ge1Ho1.ICSD_245770    | metal      | metal     |
| Au1Ge1Ho1.ICSD_656875    | metal      | metal     |
| Au1Ge1La1.ICSD_405322    | metal      | metal     |
| Au1Ge1Li2.ICSD_52668     | metal      | metal     |
| Au1Ge1Lu1.ICSD_81734     | metal      | metal     |
| Au1Ge1Na1.ICSD_78866     | metal      | metal     |
| Au1Ge1Nd1.ICSD_656870    | metal      | metal     |
| Au1Ge1Pr1.ICSD_656869    | metal      | metal     |
| Au1Ge1Sc1.ICSD_81733     | metal      | metal     |
| Au1Ge1Tb1.ICSD_656873    | metal      | metal     |
| Au1Ge1Y1.ICSD_405323     | metal      | metal     |
| Au1Ge1Yb1.ICSD_656877    | metal      | metal     |
| Au1Ge1Yb1.ICSD_85835     | metal      | metal     |
| Au1Ge2In3Yb3.ICSD_261317 | metal      | metal     |
| Au1Ge4K3.ICSD_413728     | insulator  | insulator |
| Au1Ge4Rb3.ICSD_413724    | insulator  | insulator |
| Au1H3Ti3.ICSD_611953     | metal      | metal     |
| Au1Hf1.ICSD_611959       | metal      | metal     |
| Au1Hf2.ICSD_611958       | metal      | metal     |
| Au1Ho1In1.ICSD_54955     | metal      | metal     |
| Au1Ho1Ni4.ICSD_611998    | metal      | metal     |
| Au1Ho1Pb1.ICSD_58487     | metal      | metal     |
| Au1Ho1Sn1.ICSD_55001     | metal      | metal     |
| Au1Ho1Sn1.ICSD_58488     | metal      | metal     |
| Au1Ho1Sn1.ICSD_612005    | metal      | metal     |
| Au1Ho1.ICSD_58479        | metal      | metal     |
| Au1Ho1.ICSD_611986       | metal      | metal     |
| Au1Ho2.ICSD_58480        | metal      | metal     |
| Au1I1Te1.ICSD_1661       | insulator  | insulator |
| Au1I1.ICSD_24619         | insulator  | insulator |
| Au1I2K5O2.ICSD_40376     | insulator  | insulator |
| Au1I4K1O12.ICSD_417267   | insulator  | insulator |
| Au1I4K1.ICSD_406966      | metal      | insulator |
| Au1In1La1.ICSD_58496     | metal      | metal     |
| Au1In1Li2.ICSD_58497     | metal      | metal     |
| Au1In1Nd1.ICSD_58499     | metal      | metal     |
| Au1In1O2.ICSD_95672      | metal      | insulator |
| Au1In1Pr1.ICSD_612052    | metal      | metal     |
| Au1In1Sm1.ICSD_58505     | metal      | metal     |
| Au1In1Sr1.ICSD_391422    | metal      | metal     |
| Au1In1Tb1.ICSD_54949     | metal      | metal     |
| Au1In1Y1.ICSD_58513      | metal      | metal     |

Supplementary Table 89. Five-fold cross validated predictions for the metal/insulator classification (81/598).

| system                  | calculated | predicted |
|-------------------------|------------|-----------|
| Au1In2Na1.ICSD_107505   | metal      | metal     |
| Au1In2Na3.ICSD_170867   | metal      | metal     |
| Au1In2Yb1.ICSD_410436   | metal      | metal     |
| Au1In2.ICSD_612012      | metal      | metal     |
| Au1K1N12.ICSD_416489    | insulator  | insulator |
| Au1K1N4O12.ICSD_16141   | insulator  | insulator |
| Au1K1Na2O2.ICSD_61226   | insulator  | insulator |
| Au1K1O2.ICSD_15115      | insulator  | insulator |
| Au1K1O8S2.ICSD_412094   | insulator  | insulator |
| Au1K1P2S7.ICSD_165325   | insulator  | insulator |
| Au1K1S1.ICSD_202178     | insulator  | insulator |
| Au1K1S5.ICSD_402875     | insulator  | insulator |
| Au1K1Se1.ICSD_656713    | insulator  | insulator |
| Au1K1Se2.ICSD_84003     | insulator  | insulator |
| Au1K1Se5.ICSD_67372     | insulator  | insulator |
| Au1K1Te1.ICSD_655856    | metal      | metal     |
| Au1K2P1S4.ICSD_85679    | insulator  | insulator |
| Au1K2P1.ICSD_300201     | insulator  | insulator |
| Au1K2Sb1.ICSD_380340    | insulator  | insulator |
| Au1K3O1.ICSD_79086      | insulator  | insulator |
| Au1K3P2Se8.ICSD_165321  | insulator  | insulator |
| Au1K3Se13.ICSD_67373    | insulator  | insulator |
| Au1K3Se2.ICSD_402000    | insulator  | insulator |
| Au1K3Sn4.ICSD_107444    | insulator  | insulator |
| Au1K5P2.ICSD_40700      | insulator  | insulator |
| Au1La1O3.ICSD_73873     | insulator  | insulator |
| Au1La1Pb1.ICSD_612104   | metal      | metal     |
| Au1La1Sb2.ICSD_658238   | metal      | metal     |
| Au1La1.ICSD_612099      | metal      | metal     |
| Au1La1.ICSD_612101      | metal      | metal     |
| Au1La2.ICSD_612100      | metal      | metal     |
| Au1Li1Mg1Sn1.ICSD_16477 | metal      | metal     |
| Au1Li1S1.ICSD_165259    | insulator  | insulator |
| Au1Li1S1.ICSD_280534    | insulator  | insulator |
| Au1Li1Sb1.ICSD_107996   | metal      | metal     |
| Au1Li1Sn1.ICSD_412208   | metal      | metal     |
| Au1Li2Pb1.ICSD_58528    | metal      | metal     |
| Au1Li2Sb1.ICSD_58529    | metal      | insulator |
| Au1Li2Sn1.ICSD_58533    | metal      | metal     |
| Au1Li2Th1.ICSD_58534    | metal      | metal     |
| Au1Li3O3.ICSD_15113     | insulator  | insulator |
| Au1Li3S2.ICSD_280535    | insulator  | insulator |
| Au1Li3.ICSD_58524       | metal      | metal     |
| Au1Lu1Ni4.ICSD_612133   | metal      | metal     |
| Au1Lu1Si1.ICSD_71999    | metal      | metal     |
| Au1Lu1Sn1.ICSD_415825   | metal      | metal     |
| Au1Lu1.ICSD_58535       | metal      | metal     |
| Au1Lu2.ICSD_612129      | metal      | metal     |
| Au1Mg1Sn1.ICSD_16475    | metal      | metal     |
| Au1Mg1Yb1.ICSD_411303   | metal      | metal     |

Supplementary Table 90. Five-fold cross validated predictions for the metal/insulator classification (82/598).

| system                  | calculated | predicted |
|-------------------------|------------|-----------|
| Au1Mg1.ICSD_612143      | metal      | metal     |
| Au1Mg2.ICSD_58540       | metal      | metal     |
| Au1Mg3.ICSD_106287      | metal      | metal     |
| Au1Mg3.ICSD_58541       | metal      | metal     |
| Au1Mg3.ICSD_58542       | metal      | metal     |
| Au1Mg3.ICSD_612138      | metal      | metal     |
| Au1Mn1Sb1.ICSD_612167   | metal      | metal     |
| Au1Mn1Sn1.ICSD_240860   | metal      | metal     |
| Au1Mn1.ICSD_109348      | metal      | metal     |
| Au1Mn1.ICSD_109349      | metal      | metal     |
| Au1Mn2.ICSD_58548       | metal      | metal     |
| Au1Mn3.ICSD_150552      | metal      | metal     |
| Au1N12Rb1.ICSD_416488   | insulator  | insulator |
| Au1N1Sr2.ICSD_95826     | metal      | metal     |
| Au1N1V3.ICSD_58547      | metal      | metal     |
| Au1N1.ICSD_167866       | metal      | metal     |
| Au1N1.ICSD_167882       | metal      | metal     |
| Au1N2.ICSD_166464       | metal      | metal     |
| Au1N2.ICSD_166465       | metal      | insulator |
| Au1Na1O2.ICSD_409547    | insulator  | insulator |
| Au1Na1Se2.ICSD_84004    | insulator  | insulator |
| Au1Na1Sn1.ICSD_58554    | metal      | metal     |
| Au1Na1Sn1.ICSD_660108   | metal      | metal     |
| Au1Na1Te1.ICSD_71650    | metal      | metal     |
| Au1Na2O2Rb1.ICSD_411460 | insulator  | insulator |
| Au1Na2Sb1.ICSD_23255    | insulator  | insulator |
| Au1Na2Sn3.ICSD_107556   | metal      | metal     |
| Au1Na2.ICSD_58527       | metal      | metal     |
| Au1Na3O2.ICSD_62066     | insulator  | insulator |
| Au1Na3S2.ICSD_202329    | insulator  | insulator |
| Au1Na4Ti1.ICSD_107428   | metal      | metal     |
| Au1Nb3.ICSD_612198      | metal      | metal     |
| Au1Nd1Pb1.ICSD_612219   | metal      | metal     |
| Au1Nd1Sb2.ICSD_658241   | metal      | metal     |
| Au1Nd1Sn1.ICSD_54998    | metal      | metal     |
| Au1Nd1Sn1.ICSD_612224   | metal      | metal     |
| Au1Nd1.ICSD_58565       | metal      | metal     |
| Au1Nd1.ICSD_612215      | metal      | metal     |
| Au1Nd1.ICSD_612217      | metal      | metal     |
| Au1Nd2P3.ICSD_411552    | metal      | metal     |
| Au1Ni2Sn4.ICSD_150127   | metal      | metal     |
| Au1Ni4Sc1.ICSD_612227   | metal      | metal     |
| Au1Ni4Tb1.ICSD_612229   | metal      | metal     |
| Au1Ni4Y1.ICSD_612233    | metal      | metal     |
| Au1Ni4Yb1.ICSD_612234   | metal      | metal     |
| Au1O1Rb1.ICSD_409552    | insulator  | insulator |
| Au1O1Rb3.ICSD_75499     | insulator  | insulator |
| Au1O2Rb1.ICSD_15116     | insulator  | insulator |
| Au1O2Sc1.ICSD_95669     | insulator  | insulator |
| Au1O2Y1.ICSD_95675      | insulator  | insulator |

Supplementary Table 91. Five-fold cross validated predictions for the metal/insulator classification (83/598).

| system                  | calculated | predicted |
|-------------------------|------------|-----------|
| Au1O8Rb1S2.ICSD_412095  | insulator  | insulator |
| Au1O8Rb1Se2.ICSD_413989 | insulator  | insulator |
| Au1P1S4Ti2.ICSD_85680   | insulator  | insulator |
| Au1P1S4.ICSD_413009     | insulator  | insulator |
| Au1Pb1Pr1.ICSD_612247   | metal      | metal     |
| Au1Pb1Tb1.ICSD_58569    | metal      | metal     |
| Au1Pb1Y1.ICSD_58570     | metal      | metal     |
| Au1Pb2.ICSD_56272       | metal      | metal     |
| Au1Pb3.ICSD_58567       | metal      | metal     |
| Au1Pb4Rb3.ICSD_107447   | insulator  | insulator |
| Au1Pd3.ICSD_180877      | metal      | metal     |
| Au1Pr1Sb2.ICSD_658240   | metal      | metal     |
| Au1Pr1Sn1.ICSD_54997    | metal      | metal     |
| Au1Pr1Sn1.ICSD_612271   | metal      | metal     |
| Au1Pr1.ICSD_58575       | metal      | metal     |
| Au1Pr1.ICSD_612261      | metal      | metal     |
| Au1Pr1.ICSD_612264      | metal      | metal     |
| Au1Pr2.ICSD_150634      | metal      | metal     |
| Au1Pt4U1.ICSD_612276    | metal      | metal     |
| Au1Rb1S1.ICSD_71654     | insulator  | insulator |
| Au1Rb1Se1.ICSD_656714   | insulator  | insulator |
| Au1Rb1Se3U1.ICSD_420483 | insulator  | insulator |
| Au1Rb1Te1.ICSD_71652    | insulator  | insulator |
| Au1Rb1Te1.ICSD_75026    | metal      | insulator |
| Au1Rb1Te3U1.ICSD_420485 | insulator  | insulator |
| Au1Rb1.ICSD_58428       | insulator  | metal     |
| Au1Rb2S4Sb1.ICSD_54507  | insulator  | insulator |
| Au1Rb3Sn4.ICSD_107445   | insulator  | insulator |
| Au1Si1Ta5.ICSD_51139    | metal      | metal     |
| Au1S2V1.ICSD_96089      | metal      | metal     |
| Au1Sb1Sr1.ICSD_106292   | metal      | metal     |
| Au1Sb1Ti1.ICSD_391381   | metal      | metal     |
| Au1Sb1Yb1.ICSD_83984    | metal      | metal     |
| Au1Sb2Sm1.ICSD_658242   | metal      | metal     |
| Au1Sb2U1.ICSD_157378    | metal      | metal     |
| Au1Sb2.ICSD_43107       | metal      | metal     |
| Au1Sb3.ICSD_43504       | metal      | metal     |
| Au1Sc1Si1.ICSD_71998    | metal      | metal     |
| Au1Sc1Sn1.ICSD_245753   | metal      | metal     |
| Au1Sc1Sn1.ICSD_612303   | metal      | metal     |
| Au1Sc1.ICSD_58582       | metal      | metal     |
| Au1Se1.ICSD_52674       | metal      | metal     |
| Au1Se1.ICSD_73668       | metal      | metal     |
| Au1Se1.ICSD_73700       | metal      | metal     |
| Au1Se3Ti4.ICSD_612311   | metal      | metal     |
| Au1Si1Th1.ICSD_75032    | metal      | metal     |
| Au1Si1U1.ICSD_81907     | metal      | metal     |
| Au1Si1Y1.ICSD_72000     | metal      | metal     |
| Au1Si1Yb1.ICSD_89631    | metal      | metal     |
| Au1Sm1Sn1.ICSD_245763   | metal      | metal     |

Supplementary Table 92. Five-fold cross validated predictions for the metal/insulator classification (84/598).

| system                | calculated | predicted |
|-----------------------|------------|-----------|
| Au1Sm1Sn1_ICSD_245764 | metal      | metal     |
| Au1Sm1Sn1_ICSD_612343 | metal      | metal     |
| Au1Sm1_ICSD_58584     | metal      | metal     |
| Au1Sm1_ICSD_612333    | metal      | metal     |
| Au1Sm1_ICSD_612335    | metal      | metal     |
| Au1Sn1Sr1_ICSD_412013 | metal      | metal     |
| Au1Sn1Tb1_ICSD_54999  | metal      | metal     |
| Au1Sn1Tb1_ICSD_612357 | metal      | metal     |
| Au1Sn1Tm1_ICSD_245757 | metal      | metal     |
| Au1Sn1Tm1_ICSD_245758 | metal      | metal     |
| Au1Sn1Tm1_ICSD_416420 | metal      | metal     |
| Au1Sn1Tm1_ICSD_58592  | metal      | metal     |
| Au1Sn1U1_ICSD_612359  | metal      | metal     |
| Au1Sn1U1_ICSD_657567  | metal      | metal     |
| Au1Sn1Y1_ICSD_415826  | metal      | metal     |
| Au1Sn1Y1_ICSD_612362  | metal      | metal     |
| Au1Sn1_ICSD_612356    | metal      | metal     |
| Au1Sn2_ICSD_58587     | metal      | metal     |
| Au1Sn4_ICSD_612348    | metal      | metal     |
| Au1Sr1_ICSD_58594     | metal      | metal     |
| Au1Ta2_ICSD_612373    | metal      | metal     |
| Au1Ta3_ICSD_58599     | metal      | metal     |
| Au1Tb1_ICSD_58600     | metal      | metal     |
| Au1Tb1_ICSD_612379    | metal      | metal     |
| Au1Tb2_ICSD_612381    | metal      | metal     |
| Au1Te2_ICSD_30905     | metal      | metal     |
| Au1Te2_ICSD_612391    | metal      | metal     |
| Au1Te2_ICSD_659326    | metal      | metal     |
| Au1Te2_ICSD_659331    | metal      | metal     |
| Au1Th1_ICSD_601380    | metal      | metal     |
| Au1Th2_ICSD_58602     | metal      | metal     |
| Au1Ti1_ICSD_58603     | metal      | metal     |
| Au1Ti1_ICSD_612407    | metal      | metal     |
| Au1Ti1_ICSD_612415    | metal      | metal     |
| Au1Ti3_ICSD_58604     | metal      | metal     |
| Au1Ti3_ICSD_612417    | metal      | metal     |
| Au1Ti2_ICSD_102798    | metal      | metal     |
| Au1Ti3_ICSD_186643    | metal      | metal     |
| Au1Tm1_ICSD_58608     | metal      | metal     |
| Au1Tm1_ICSD_612431    | metal      | metal     |
| Au1Tm1_ICSD_612432    | metal      | metal     |
| Au1V3_ICSD_58611      | metal      | metal     |
| Au1V3_ICSD_612459     | metal      | metal     |
| Au1Y1_ICSD_169022     | metal      | metal     |
| Au1Y1_ICSD_58617      | metal      | metal     |
| Au1Y2_ICSD_262044     | metal      | metal     |
| Au1Yb1Zn1_ICSD_159306 | metal      | metal     |
| Au1Yb1_ICSD_612473    | metal      | metal     |
| Au1Yb1_ICSD_612495    | metal      | metal     |
| Au1Yb2_ICSD_612475    | metal      | metal     |

Supplementary Table 93. Five-fold cross validated predictions for the metal/insulator classification (85/598).

| system                 | calculated | predicted |
|------------------------|------------|-----------|
| Au1Zn1_ICSD_612506     | metal      | metal     |
| Au1Zn3_ICSD_58626      | metal      | metal     |
| Au1Zr2_ICSD_612512     | metal      | metal     |
| Au1Zr3_ICSD_58630      | metal      | metal     |
| Au1_ICSD_611625        | metal      | metal     |
| Au2Ba1F12_ICSD_39316   | insulator  | insulator |
| Au2Ba1F8_ICSD_65289    | insulator  | insulator |
| Au2Ba1In2_ICSD_249562  | metal      | metal     |
| Au2Ba1O4_ICSD_80327    | insulator  | insulator |
| Au2Ba1Sb2_ICSD_416298  | metal      | metal     |
| Au2Ba1_ICSD_181532     | metal      | metal     |
| Au2Ba3_ICSD_611635     | metal      | metal     |
| Au2Be1_ICSD_150581     | metal      | metal     |
| Au2Bi1Dy5_ICSD_156957  | metal      | metal     |
| Au2Bi1Er5_ICSD_156959  | metal      | metal     |
| Au2Bi1Ho5_ICSD_156958  | metal      | metal     |
| Au2Bi1Tb5_ICSD_156956  | metal      | metal     |
| Au2Bi1_ICSD_52284      | metal      | metal     |
| Au2Br2H12N4_ICSD_80216 | insulator  | insulator |
| Au2Br6Cs2_ICSD_170696  | insulator  | insulator |
| Au2Br6Rb2_ICSD_9577    | insulator  | insulator |
| Au2Br6_ICSD_4069       | insulator  | insulator |
| Au2C10Cl8S8_ICSD_65114 | insulator  | insulator |
| Au2Ca1F12_ICSD_39315   | insulator  | insulator |
| Au2Ca1Ge2_ICSD_25333   | metal      | metal     |
| Au2Ca1O4_ICSD_79801    | insulator  | insulator |
| Au2Ca1Si2_ICSD_412     | metal      | metal     |
| Au2Ca1_ICSD_55542      | metal      | metal     |
| Au2Ca2Pb1_ICSD_409531  | metal      | metal     |
| Au2Ca5_ICSD_58403      | metal      | metal     |
| Au2Cd1F12_ICSD_415873  | insulator  | insulator |
| Au2Cd1F8_ICSD_85413    | insulator  | insulator |
| Au2Cd2Rb2S4_ICSD_85582 | insulator  | insulator |
| Au2Ce1Ge2_ICSD_246610  | metal      | metal     |
| Au2Ce1In1_ICSD_611714  | metal      | metal     |
| Au2Ce1Si2_ICSD_418530  | metal      | metal     |
| Au2Ce1Si2_ICSD_611726  | metal      | metal     |
| Au2Ce1_ICSD_611706     | metal      | metal     |
| Au2Ce3Sb3_ICSD_163719  | metal      | metal     |
| Au2Cl6Cs2_ICSD_417370  | insulator  | insulator |
| Au2Cl6Cs2_ICSD_56470   | insulator  | insulator |
| Au2Cs1F7_ICSD_152057   | insulator  | insulator |
| Au2Cs2I6_ICSD_186066   | insulator  | insulator |
| Au2Cs2Se3_ICSD_85708   | insulator  | insulator |
| Au2Dy1In1_ICSD_58442   | metal      | metal     |
| Au2Dy1Si2_ICSD_106691  | metal      | metal     |
| Au2Dy1_ICSD_58440      | metal      | metal     |
| Au2Dy2In1_ICSD_106280  | metal      | metal     |
| Au2Dy5Sb1_ICSD_156952  | metal      | metal     |
| Au2Er1In1_ICSD_58449   | metal      | metal     |

Supplementary Table 94. Five-fold cross validated predictions for the metal/insulator classification (86/598).

| system                  | calculated | predicted |
|-------------------------|------------|-----------|
| Au2Er1Si2.ICSD.106692   | metal      | metal     |
| Au2Er1.ICSD.611807      | metal      | metal     |
| Au2Er2In1.ICSD.658840   | metal      | metal     |
| Au2Er2Sn1.ICSD.658830   | metal      | metal     |
| Au2Er5Sb1.ICSD.156954   | metal      | metal     |
| Au2Er7Te2.ICSD.168470   | metal      | metal     |
| Au2Eu1Ge2.ICSD.421997   | metal      | metal     |
| Au2Eu1Si2.ICSD.106690   | metal      | metal     |
| Au2Eu1Si2.ICSD.611854   | metal      | metal     |
| Au2Eu1.ICSD.611839      | metal      | metal     |
| Au2Eu2Sn5.ICSD.410884   | metal      | metal     |
| Au2F11H1Mg1.ICSD.415872 | insulator  | insulator |
| Au2F8Hg1.ICSD.85414     | insulator  | insulator |
| Au2F8Mg1.ICSD.65287     | insulator  | insulator |
| Au2F8Ni1.ICSD.65288     | insulator  | insulator |
| Au2F8Zn1.ICSD.65286     | insulator  | insulator |
| Au2Ga1.ICSD.58459       | metal      | metal     |
| Au2Ga2Sr1.ICSD.370004   | metal      | metal     |
| Au2Gd1In1.ICSD.185965   | metal      | metal     |
| Au2Gd1In1.ICSD.58466    | metal      | metal     |
| Au2Gd1Si2.ICSD.52667    | metal      | metal     |
| Au2Gd1Si2.ICSD.55941    | metal      | metal     |
| Au2Gd1Si2.ICSD.611929   | metal      | metal     |
| Au2Gd1.ICSD.611904      | metal      | metal     |
| Au2Gd1.ICSD.611914      | metal      | metal     |
| Au2Gd2Sn1.ICSD.658833   | metal      | metal     |
| Au2Ge2Nd1.ICSD.164728   | metal      | metal     |
| Au2Ge2Sr1.ICSD.25334    | metal      | metal     |
| Au2Ge2Th1.ICSD.52670    | metal      | metal     |
| Au2Hf1In1.ICSD.58472    | metal      | metal     |
| Au2Hf1.ICSD.611956      | metal      | metal     |
| Au2Ho1In1.ICSD.58486    | metal      | metal     |
| Au2Ho1Si2.ICSD.55944    | metal      | metal     |
| Au2Ho1.ICSD.611984      | metal      | metal     |
| Au2Ho2In1.ICSD.658839   | metal      | metal     |
| Au2Ho2Sn1.ICSD.658829   | metal      | metal     |
| Au2Ho5Sb1.ICSD.156953   | metal      | metal     |
| Au2Ho7Te2.ICSD.262392   | metal      | metal     |
| Au2In1Lu1.ICSD.58498    | metal      | metal     |
| Au2In1Nd1.ICSD.58500    | metal      | metal     |
| Au2In1Pr1.ICSD.58503    | metal      | metal     |
| Au2In1Sc1.ICSD.58504    | metal      | metal     |
| Au2In1Sm1.ICSD.58506    | metal      | metal     |
| Au2In1Tb1.ICSD.58508    | metal      | metal     |
| Au2In1Tb2.ICSD.658837   | metal      | metal     |
| Au2In1Th1.ICSD.58509    | metal      | metal     |
| Au2In1Ti1.ICSD.58510    | metal      | metal     |
| Au2In1U1.ICSD.612076    | metal      | metal     |
| Au2In1Y1.ICSD.58514     | metal      | metal     |
| Au2In1Y2.ICSD.658835    | metal      | metal     |

Supplementary Table 95. Five-fold cross validated predictions for the metal/insulator classification (87/598).

| system                  | calculated | predicted |
|-------------------------|------------|-----------|
| Au2In1Yb1.ICSD.58516    | metal      | metal     |
| Au2In1Zr1.ICSD.58517    | metal      | metal     |
| Au2In2Sr1.ICSD.249563   | metal      | metal     |
| Au2In4La1.ICSD.249529   | metal      | metal     |
| Au2In4Nd1.ICSD.249532   | metal      | metal     |
| Au2In4Pr1.ICSD.249531   | metal      | metal     |
| Au2In4Yb1.ICSD.261042   | metal      | metal     |
| Au2K1.ICSD.58520        | metal      | metal     |
| Au2K2P2Se6.ICSD.165322  | insulator  | insulator |
| Au2K2S4Sn1.ICSD.74022   | insulator  | insulator |
| Au2La1Si2.ICSD.106686   | metal      | metal     |
| Au2La1.ICSD.612096      | metal      | metal     |
| Au2La4O9.ICSD.74989     | insulator  | insulator |
| Au2Lu1.ICSD.612125      | metal      | metal     |
| Au2Lu5Te2.ICSD.261995   | metal      | metal     |
| Au2Mn1.ICSD.612163      | metal      | metal     |
| Au2Na1.ICSD.612178      | metal      | metal     |
| Au2Nb1.ICSD.58558       | metal      | metal     |
| Au2Nb3.ICSD.58559       | metal      | metal     |
| Au2Nb3.ICSD.612191      | metal      | metal     |
| Au2Nd1Si2.ICSD.106689   | metal      | metal     |
| Au2Nd1Si2.ICSD.55939    | metal      | metal     |
| Au2O10Se3.ICSD.170260   | insulator  | insulator |
| Au2O11Se4.ICSD.15495    | insulator  | insulator |
| Au2O3.ICSD.8014         | insulator  | insulator |
| Au2O4Sr1.ICSD.80328     | insulator  | insulator |
| Au2O7Se2.ICSD.37009     | insulator  | insulator |
| Au2P2Pb1.ICSD.412224    | metal      | metal     |
| Au2P2Se6Ti2.ICSD.171216 | insulator  | insulator |
| Au2P3.ICSD.8058         | insulator  | insulator |
| Au2Pb1Yb2.ICSD.409532   | metal      | metal     |
| Au2Pb1.ICSD.56261       | metal      | metal     |
| Au2Pr1Si2.ICSD.106688   | metal      | metal     |
| Au2Pr1.ICSD.58577       | metal      | metal     |
| Au2Pu1Si2.ICSD.73040    | metal      | metal     |
| Au2S1.ICSD.612282       | insulator  | metal     |
| Au2Sb1Tb5.ICSD.156951   | metal      | metal     |
| Au2Sc1.ICSD.612299      | metal      | metal     |
| Au2Si2Sm1.ICSD.52675    | metal      | metal     |
| Au2Si2Sr1.ICSD.413      | metal      | metal     |
| Au2Si2Tb1.ICSD.55818    | metal      | metal     |
| Au2Si2Th1.ICSD.52676    | metal      | metal     |
| Au2Si2U1.ICSD.52677     | metal      | metal     |
| Au2Si2U1.ICSD.612325    | metal      | metal     |
| Au2Si2Y1.ICSD.55943     | metal      | metal     |
| Au2Si2Yb1.ICSD.52678    | metal      | metal     |
| Au2Sn1Tb2.ICSD.658834   | metal      | metal     |
| Au2Sn1U1.ICSD.58593     | metal      | metal     |
| Au2Sr1.ICSD.55543       | metal      | metal     |
| Au2Sr3.ICSD.58596       | metal      | metal     |

Supplementary Table 96. Five-fold cross validated predictions for the metal/insulator classification (88/598).

| system                     | calculated | predicted |
|----------------------------|------------|-----------|
| Au2Tb1_ICSD_612375         | metal      | metal     |
| Au2Th1_ICSD_15444          | metal      | metal     |
| Au2Ti1_ICSD_58607          | metal      | metal     |
| Au2Tm1_ICSD_58387          | metal      | metal     |
| Au2Tm1_ICSD_612427         | metal      | metal     |
| Au2Tm1_ICSD_612435         | metal      | metal     |
| Au2Tm1_ICSD_612437         | metal      | metal     |
| Au2U1_ICSD_58609           | metal      | metal     |
| Au2U1_ICSD_612443          | metal      | metal     |
| Au2V1_ICSD_58614           | metal      | metal     |
| Au2Y1_ICSD_612462          | metal      | metal     |
| Au2Y3_ICSD_262043          | metal      | metal     |
| Au2Yb1_ICSD_58388          | metal      | metal     |
| Au2Zr1_ICSD_612510         | metal      | metal     |
| Au31Mn9_ICSD_58552         | metal      | metal     |
| Au3C6Co1K1N6_ICSD_201056   | insulator  | insulator |
| Au3C6H6La1N6O3_ICSD_170989 | insulator  | insulator |
| Au3C6K1N6Ni1_ICSD_249724   | insulator  | insulator |
| Au3Ca1Ga1_ICSD_249634      | metal      | metal     |
| Au3Ca2In4_ICSD_410702      | metal      | metal     |
| Au3Ca3In1_ICSD_418239      | metal      | metal     |
| Au3Ca5_ICSD_58404          | metal      | metal     |
| Au3Cd5_ICSD_58416          | metal      | metal     |
| Au3Cl8Rb3_ICSD_9578        | insulator  | insulator |
| Au3Cs1Ga2_ICSD_263058      | metal      | metal     |
| Au3Cu1_ICSD_56266          | metal      | metal     |
| Au3Dy1_ICSD_611784         | metal      | metal     |
| Au3Dy3Sb4_ICSD_611802      | insulator  | insulator |
| Au3Er1_ICSD_611810         | metal      | metal     |
| Au3Er3Ga8_ICSD_611824      | metal      | metal     |
| Au3Er3Sb4_ICSD_611833      | insulator  | insulator |
| Au3Eu1In3_ICSD_245680      | metal      | metal     |
| Au3F12La1_ICSD_78915       | insulator  | insulator |
| Au3Ga2Rb1_ICSD_263057      | metal      | metal     |
| Au3Ga7Yb1_ICSD_402170      | metal      | metal     |
| Au3Gd3Sb4_ICSD_611925      | insulator  | insulator |
| Au3Ge1Na1_ICSD_16463       | insulator  | metal     |
| Au3Ge1Sr1_ICSD_262386      | metal      | metal     |
| Au3Hf1_ICSD_611955         | metal      | metal     |
| Au3Ho1_ICSD_611983         | metal      | metal     |
| Au3Ho3Sb4_ICSD_612001      | insulator  | insulator |
| Au3In1_ICSD_612031         | metal      | metal     |
| Au3In2_ICSD_612030         | metal      | metal     |
| Au3In3Sr1_ICSD_245679      | metal      | metal     |
| Au3In3Yb3_ICSD_261318      | metal      | metal     |
| Au3K1Sn3_ICSD_249645       | metal      | metal     |
| Au3K2_ICSD_65113           | metal      | metal     |
| Au3K3Sb2_ICSD_78977        | insulator  | insulator |
| Au3La3Sb4_ICSD_612105      | insulator  | metal     |
| Au3Li1Na2_ICSD_152090      | metal      | metal     |

Supplementary Table 97. Five-fold cross validated predictions for the metal/insulator classification (89/598).

| system                | calculated | predicted |
|-----------------------|------------|-----------|
| Au3Li1Sn4_ICSD_412207 | metal      | metal     |
| Au3Li1_ICSD_58525     | metal      | metal     |
| Au3Lu1_ICSD_612128    | metal      | metal     |
| Au3Lu3Sb4_ICSD_612134 | insulator  | insulator |
| Au3Na1Si1_ICSD_16462  | insulator  | metal     |
| Au3Nd3Sb4_ICSD_612220 | metal      | metal     |
| Au3O2Rb5_ICSD_91308   | insulator  | insulator |
| Au3P7Sn1_ICSD_416407  | insulator  | insulator |
| Au3Pd1_ICSD_180872    | metal      | metal     |
| Au3Pr3Sb4_ICSD_612269 | metal      | metal     |
| Au3Rb1Se2_ICSD_82541  | insulator  | metal     |
| Au3Rb2Tl1_ICSD_249924 | metal      | metal     |
| Au3Rb2_ICSD_106288    | metal      | metal     |
| Au3Rb3Sb2_ICSD_78978  | insulator  | insulator |
| Au3Sb4Sm3_ICSD_612289 | metal      | metal     |
| Au3Sb4Tb3_ICSD_612293 | insulator  | insulator |
| Au3Sb4Y3_ICSD_957     | insulator  | insulator |
| Au3Sm1_ICSD_58585     | metal      | metal     |
| Au3Sn2Yb2_ICSD_710044 | metal      | metal     |
| Au3Sn4U3_ICSD_612361  | metal      | metal     |
| Au3Sr7_ICSD_58597     | metal      | metal     |
| Au3Tb1_ICSD_612380    | metal      | metal     |
| Au3Y1_ICSD_612464     | metal      | metal     |
| Au3Yb1_ICSD_612472    | metal      | metal     |
| Au3Yb5_ICSD_58621     | metal      | metal     |
| Au3Yb7_ICSD_58622     | metal      | metal     |
| Au3Zn1_ICSD_654236    | metal      | metal     |
| Au3Zr1_ICSD_612509    | metal      | metal     |
| Au4Ca1Cd2_ICSD_424033 | metal      | metal     |
| Au4Ca3_ICSD_54547     | metal      | metal     |
| Au4Ca5_ICSD_58406     | metal      | metal     |
| Au4Cd1K2S4_ICSD_85583 | insulator  | insulator |
| Au4Ce1Si2_ICSD_154801 | metal      | metal     |
| Au4Ce1Si2_ICSD_418529 | metal      | metal     |
| Au4Cl8_ICSD_201436    | insulator  | insulator |
| Au4Cr1_ICSD_611737    | metal      | metal     |
| Au4Er1_ICSD_611812    | metal      | metal     |
| Au4Hf1_ICSD_611961    | metal      | metal     |
| Au4Ho1_ICSD_58483     | metal      | metal     |
| Au4In2K1_ICSD_249221  | metal      | metal     |
| Au4In2Rb1_ICSD_249220 | metal      | metal     |
| Au4In6K1_ICSD_249520  | metal      | metal     |
| Au4In6Rb1_ICSD_249521 | metal      | metal     |
| Au4K1Sn2_ICSD_58522   | metal      | metal     |
| Au4K1Sn6_ICSD_249644  | metal      | metal     |
| Au4Li15_ICSD_150973   | metal      | metal     |
| Au4Lu1_ICSD_612131    | metal      | metal     |
| Au4Mn1_ICSD_657182    | metal      | metal     |
| Au4S3Ti2_ICSD_51235   | insulator  | insulator |
| Au4Sc1_ICSD_612300    | metal      | metal     |

Supplementary Table 98. Five-fold cross validated predictions for the metal/insulator classification (90/598).

| system                    | calculated | predicted |
|---------------------------|------------|-----------|
| Au4Th3.ICSD_601382        | metal      | metal     |
| Au4Ti1.ICSD_612411        | metal      | metal     |
| Au4V1.ICSD_612460         | metal      | metal     |
| Au4Yb1.ICSD_612477        | metal      | metal     |
| Au4Yb5.ICSD_58624         | metal      | metal     |
| Au4Zr1.ICSD_58631         | metal      | metal     |
| Au5Ba1.ICSD_58395         | metal      | metal     |
| Au5Ca1.ICSD_58407         | metal      | metal     |
| Au5Cd8.ICSD_611679        | metal      | metal     |
| Au5Cs7O2.ICSD_411334      | insulator  | insulator |
| Au5Cs7O2.ICSD_95821       | insulator  | insulator |
| Au5Eu1.ICSD_58452         | metal      | metal     |
| Au5In1K3.ICSD_249922      | metal      | metal     |
| Au5K1.ICSD_106286         | metal      | metal     |
| Au5K3Pb1.ICSD_107450      | metal      | metal     |
| Au5Mn2.ICSD_612154        | metal      | metal     |
| Au5O2Rb7.ICSD_95825       | insulator  | insulator |
| Au5Rb1.ICSD_612281        | metal      | metal     |
| Au5Sn1.ICSD_58589         | metal      | metal     |
| Au5Sr1.ICSD_612363        | metal      | metal     |
| Au6Ba8Ge40.ICSD_181524    | metal      | metal     |
| Au6Ba8Si40.ICSD_186541    | metal      | metal     |
| Au6Dy1.ICSD_611790        | metal      | metal     |
| Au6Ga3Sr2.ICSD_426465     | metal      | metal     |
| Au6Hg5.ICSD_150475        | metal      | metal     |
| Au6Ho1.ICSD_611991        | metal      | metal     |
| Au6In5Na2.ICSD_55545      | metal      | metal     |
| Au6Nd1.ICSD_612210        | metal      | metal     |
| Au6Pr1.ICSD_2125          | metal      | metal     |
| Au6Pr3Sn5.ICSD_419491     | metal      | metal     |
| Au6Rb4S5.ICSD_82556       | insulator  | insulator |
| Au6Sr2Zn3.ICSD_426464     | metal      | metal     |
| Au6Tb1.ICSD_612383        | metal      | metal     |
| Au7Cd16Na6.ICSD_261960    | metal      | metal     |
| Au7Cs4Sn2.ICSD_107449     | metal      | metal     |
| Au7Ga2.ICSD_654822        | metal      | metal     |
| Au7Ge2K4.ICSD_79111       | metal      | metal     |
| Au7I1P10.ICSD_12162       | insulator  | insulator |
| Au7I1P10.ICSD_8059        | insulator  | insulator |
| Au7Rb3.ICSD_106291        | metal      | metal     |
| Au7Rb4Sn2.ICSD_58581      | metal      | metal     |
| Au9In4.ICSD_58494         | metal      | metal     |
| B0.667N0.667.ICSD_162872  | insulator  | insulator |
| B10Ba2H2Na2O19.ICSD_95447 | insulator  | insulator |
| B10Ca1La2O19.ICSD_92866   | insulator  | insulator |
| B10Ce2Ni1.ICSD_91245      | metal      | metal     |
| B10Co1Th2.ICSD_78822      | metal      | metal     |
| B10Fe1Th2.ICSD_78821      | metal      | metal     |
| B10Ho3Ni19.ICSD_39286     | metal      | metal     |
| B10Nd2Ni1.ICSD_91246      | metal      | metal     |

Supplementary Table 99. Five-fold cross validated predictions for the metal/insulator classification (91/598).

| system                   | calculated | predicted |
|--------------------------|------------|-----------|
| B10Ni1Th2.ICSD_78823     | metal      | metal     |
| B10O21Pb6.ICSD_2641      | insulator  | insulator |
| B11Li1.ICSD_164841       | metal      | metal     |
| B11Li1.ICSD_164842       | metal      | metal     |
| B11Li1.ICSD_164843       | metal      | metal     |
| B11Li1.ICSD_164845       | metal      | metal     |
| B12Ba7Ir12.ICSD_8156     | metal      | metal     |
| B12Be1C2.ICSD_612548     | metal      | insulator |
| B12Br1Cs3H12.ICSD_414584 | insulator  | insulator |
| B12Br1H12K3.ICSD_414581  | insulator  | insulator |
| B12Br1H12Rb3.ICSD_414583 | insulator  | insulator |
| B12C2Li2.ICSD_415556     | insulator  | metal     |
| B12C2Mg1.ICSD_416801     | insulator  | insulator |
| B12C3.ICSD_612562        | insulator  | metal     |
| B12Cl1Cs3H12.ICSD_414586 | insulator  | insulator |
| B12Cl1H12Rb3.ICSD_414585 | insulator  | insulator |
| B12Cs2H12.ICSD_92501     | insulator  | insulator |
| B12Cs3H12I1.ICSD_98622   | insulator  | insulator |
| B12Dy1.ICSD_613592       | metal      | metal     |
| B12Er1.ICSD_613695       | metal      | metal     |
| B12Gd1.ICSD_614314       | metal      | metal     |
| B12H12I1K3.ICSD_98619    | insulator  | insulator |
| B12H12I1Rb3.ICSD_98620   | insulator  | insulator |
| B12H12K2.ICSD_36148      | insulator  | insulator |
| B12H12Rb2.ICSD_20015     | insulator  | insulator |
| B12H12Ti2.ICSD_422433    | insulator  | insulator |
| B12H20Li2O4.ICSD_163690  | insulator  | insulator |
| B12H20N2.ICSD_98618      | insulator  | insulator |
| B12Hf1.ICSD_614421       | metal      | metal     |
| B12Ho1.ICSD_614457       | metal      | metal     |
| B12Lu1.ICSD_600741       | metal      | metal     |
| B12Ni1.ICSD_614986       | insulator  | metal     |
| B12O24Se2Zn8.ICSD_74057  | insulator  | insulator |
| B12P2.ICSD_62748         | insulator  | insulator |
| B12Pu1.ICSD_615219       | metal      | metal     |
| B12S1.ICSD_150626        | metal      | insulator |
| B12Sc1.ICSD_615424       | metal      | metal     |
| B12Sc1.ICSD_68028        | metal      | metal     |
| B12Si3.ICSD_615435       | metal      | insulator |
| B12Tb1.ICSD_615534       | metal      | metal     |
| B12Th1.ICSD_615581       | metal      | metal     |
| B12Tm1.ICSD_615607       | metal      | metal     |
| B12U1.ICSD_615635        | metal      | metal     |
| B12Y1.ICSD_23860         | metal      | metal     |
| B12Yb1.ICSD_603063       | metal      | metal     |
| B12Zr1.ICSD_615752       | metal      | metal     |
| B13C2Li1.ICSD_415557     | insulator  | metal     |
| B13C2.ICSD_612568        | metal      | insulator |
| B13Co1Tb4.ICSD_44183     | metal      | metal     |
| B13Co1Y4.ICSD_39466      | metal      | metal     |

Supplementary Table 100. Five-fold cross validated predictions for the metal/insulator classification (92/598).

| system                     | calculated | predicted |
|----------------------------|------------|-----------|
| B13Er4Ni1_ICSD_20700       | metal      | metal     |
| B13N2_ICSD_162801          | metal      | insulator |
| B14Ho4Ni1_ICSD_409535      | metal      | metal     |
| B16Ir19Mg10_ICSD_163909    | metal      | metal     |
| B18Hg2Rb4Se18_ICSD_410758  | insulator  | insulator |
| B1Ba1Bi1O4_ICSD_154105     | insulator  | insulator |
| B1Ba1Bi1S4_ICSD_248222     | insulator  | insulator |
| B1Ba1Cl1F4_ICSD_188654     | insulator  | insulator |
| B1Ba1Cu1La1O5_ICSD_75318   | metal      | insulator |
| B1Ba1Cu1Nd1O5_ICSD_94205   | metal      | metal     |
| B1Ba1F10P1_ICSD_420597     | insulator  | insulator |
| B1Ba1F1O3Zn1_ICSD_248042   | insulator  | insulator |
| B1Ba1F2Ga1O3_ICSD_91315    | insulator  | insulator |
| B1Ba1F3O1_ICSD_16684       | insulator  | insulator |
| B1Ba1Li1O3_ICSD_73218      | insulator  | insulator |
| B1Ba1Li1O3_ICSD_92843      | insulator  | insulator |
| B1Ba1Li1S3_ICSD_82352      | insulator  | insulator |
| B1Ba1Na1O3_ICSD_250086     | insulator  | insulator |
| B1Ba1O5P1_ICSD_50875       | insulator  | insulator |
| B1Ba1O5P1_ICSD_99842       | insulator  | insulator |
| B1Ba1Pd4_ICSD_247264       | metal      | metal     |
| B1Ba1S4Sb1_ICSD_248221     | insulator  | insulator |
| B1Ba2Cl17Zr6_ICSD_203141   | insulator  | insulator |
| B1Ba2Cl1N2_ICSD_418947     | insulator  | insulator |
| B1Ba3O3P1_ICSD_402017      | insulator  | insulator |
| B1Ba3O7P1_ICSD_150328      | insulator  | insulator |
| B1Be2Cs1F2O3_ICSD_20000    | insulator  | insulator |
| B1Be2F1O3_ICSD_200264      | insulator  | insulator |
| B1Be2F1O3_ICSD_56847       | insulator  | insulator |
| B1Be2F2K1O3_ICSD_16178     | insulator  | insulator |
| B1Be2F2K1O3_ICSD_77277     | insulator  | insulator |
| B1Be2F2Na1O3_ICSD_75594    | insulator  | insulator |
| B1Be2F2O3Rb1_ICSD_260439   | insulator  | insulator |
| B1Be2F2O3Rb1_ICSD_4223     | insulator  | insulator |
| B1Be2H1O4_ICSD_34650       | insulator  | insulator |
| B1Be2_ICSD_108027          | metal      | metal     |
| B1Bi1O3_ICSD_413621        | insulator  | insulator |
| B1Bi1O4Pb1_ICSD_183393     | insulator  | insulator |
| B1Bi1O4Pb1_ICSD_416639     | insulator  | insulator |
| B1Bi1_ICSD_184569          | insulator  | metal     |
| B1Br1C4F4H11N1_ICSD_249155 | insulator  | insulator |
| B1Br1Eu2N2_ICSD_409982     | insulator  | insulator |
| B1Br1Mg2N2_ICSD_261620     | insulator  | insulator |
| B1Br1N2Sr2_ICSD_261795     | insulator  | insulator |
| B1Br20K8Zr6_ICSD_165310    | insulator  | insulator |
| B1Br3I3P1_ICSD_411438      | insulator  | insulator |
| B1Br3P4S3_ICSD_165186      | insulator  | insulator |
| B1Br3_ICSD_173374          | insulator  | insulator |
| B1C1Ca3Cl2N1_ICSD_33850    | insulator  | insulator |
| B1C1Cl2N1Sr3_ICSD_74914    | insulator  | insulator |

Supplementary Table 101. Five-fold cross validated predictions for the metal/insulator classification (93/598).

| system                      | calculated | predicted |
|-----------------------------|------------|-----------|
| B1C1Cl3La3_ICSD_415102      | metal      | metal     |
| B1C1Dy1_ICSD_42477          | metal      | metal     |
| B1C1F4H6N3_ICSD_202434      | insulator  | insulator |
| B1C1F6K1_ICSD_1194          | insulator  | insulator |
| B1C1Gd1_ICSD_612618         | metal      | metal     |
| B1C1H5N2_ICSD_2165          | insulator  | insulator |
| B1C1Ho1_ICSD_612623         | metal      | metal     |
| B1C1Li1_ICSD_245288         | insulator  | metal     |
| B1C1Lu1Ni1_ICSD_75610       | metal      | metal     |
| B1C1Mo2_ICSD_43318          | metal      | metal     |
| B1C1Ni1Y1_ICSD_85283        | metal      | metal     |
| B1C1Th1_ICSD_2368           | metal      | metal     |
| B1C1U1_ICSD_612669          | metal      | metal     |
| B1C1Y1_ICSD_42626           | metal      | metal     |
| B1C2Cs1F8_ICSD_200869       | insulator  | insulator |
| B1C2N1_ICSD_93040           | insulator  | insulator |
| B1C2N1_ICSD_93041           | insulator  | insulator |
| B1C2Sc2_ICSD_88804          | metal      | metal     |
| B1C3.33N1_ICSD_161278       | insulator  | insulator |
| B1C3Cs1F9N1O2_ICSD_410079   | insulator  | insulator |
| B1C3F4H10N1_ICSD_171202     | insulator  | insulator |
| B1C3H12N1_ICSD_249799       | insulator  | insulator |
| B1C3K2N3_ICSD_262588        | insulator  | insulator |
| B1C3Lu3_ICSD_411641         | metal      | metal     |
| B1C4Cl1F4H11N1_ICSD_320194  | insulator  | insulator |
| B1C4Cs1N4_ICSD_414556       | insulator  | insulator |
| B1C4Cu1N4_ICSD_414557       | insulator  | insulator |
| B1C4H4N5_ICSD_414561        | insulator  | insulator |
| B1C4K1N4_ICSD_411180        | insulator  | insulator |
| B1C4K1O8_ICSD_281621        | insulator  | insulator |
| B1C4Li1N4_ICSD_414558       | insulator  | insulator |
| B1C4N4Na1_ICSD_414559       | insulator  | insulator |
| B1C4N4Rb1_ICSD_414563       | insulator  | insulator |
| B1C4N4Tl1_ICSD_414564       | insulator  | insulator |
| B1C4Na1O8_ICSD_281622       | insulator  | insulator |
| B1C5_ICSD_166553            | metal      | metal     |
| B1C5_ICSD_166554            | metal      | metal     |
| B1C5_ICSD_166555            | metal      | metal     |
| B1C5_ICSD_166556            | metal      | metal     |
| B1C7_ICSD_181952            | metal      | metal     |
| B1C7_ICSD_181953            | metal      | metal     |
| B1C7_ICSD_181954            | metal      | metal     |
| B1C7_ICSD_181955            | metal      | metal     |
| B1C7_ICSD_181956            | metal      | metal     |
| B1Ca1Ga1O4_ICSD_93390       | insulator  | insulator |
| B1Ca1H1O3_ICSD_181633       | insulator  | insulator |
| B1Ca1H1O5Si1_ICSD_168627    | insulator  | insulator |
| B1Ca1H3Ni1O10P2_ICSD_409898 | insulator  | insulator |
| B1Ca1Li1O3_ICSD_99386       | insulator  | insulator |
| B1Ca1Ni4_ICSD_36504         | metal      | metal     |

Supplementary Table 102. Five-fold cross validated predictions for the metal/insulator classification (94/598).

| system                   | calculated | predicted |
|--------------------------|------------|-----------|
| B1Ca1O5P1.ICSD.87893     | insulator  | insulator |
| B1Ca2Cl1N2.ICSD.406361   | insulator  | insulator |
| B1Ca2Cl1O3.ICSD.342      | insulator  | insulator |
| B1Ca2F1N2.ICSD.50842     | insulator  | insulator |
| B1Ca2H1N2.ICSD.414006    | insulator  | insulator |
| B1Ca3N3.ICSD.95814       | insulator  | insulator |
| B1Cd1Cs1O3.ICSD.189199   | insulator  | insulator |
| B1Cd1Li1O3.ICSD.200615   | insulator  | insulator |
| B1Cd1Li1O3.ICSD.20191    | insulator  | insulator |
| B1Ce1Co4.ICSD.42101      | metal      | metal     |
| B1Ce1N2.ICSD.410417      | insulator  | insulator |
| B1Ce1O3.ICSD.99689       | insulator  | insulator |
| B1Ce1O3.ICSD.99690       | insulator  | insulator |
| B1Ce1O5Si1.ICSD.28026    | insulator  | insulator |
| B1Ce1Pd3.ICSD.612819     | metal      | metal     |
| B1Ce1Pt2.ICSD.90403      | metal      | metal     |
| B1Ce1Pt3.ICSD.95051      | metal      | metal     |
| B1Ce1Pt4.ICSD.55453      | metal      | metal     |
| B1Ce1Rh3.ICSD.612823     | metal      | metal     |
| B1Ce1S3.ICSD.421071      | insulator  | insulator |
| B1Cl1Cu1H4O4.ICSD.56963  | metal      | insulator |
| B1Cl1F4O2.ICSD.166598    | insulator  | insulator |
| B1Cl1F6.ICSD.68277       | insulator  | insulator |
| B1Cl1H4Na2O4.ICSD.32518  | insulator  | insulator |
| B1Cl1Mg2N2.ICSD.413908   | insulator  | insulator |
| B1Cl1N2Sr2.ICSD.50845    | insulator  | insulator |
| B1Cl2H4K1Zn1.ICSD.174294 | insulator  | insulator |
| B1Cl3.ICSD.27869         | insulator  | insulator |
| B1Cl6Sc4.ICSD.201977     | metal      | metal     |
| B1Co1Mo1.ICSD.42894      | metal      | metal     |
| B1Co1Re1.ICSD.20079      | metal      | metal     |
| B1Co1W1.ICSD.613388      | metal      | metal     |
| B1Co1.ICSD.612863        | metal      | metal     |
| B1Co2Fe1.ICSD.603579     | metal      | metal     |
| B1Co2.ICSD.42531         | metal      | metal     |
| B1Co2.ICSD.612878        | metal      | metal     |
| B1Co3Fe1Y1.ICSD.613036   | metal      | metal     |
| B1Co3O5.ICSD.93484       | insulator  | insulator |
| B1Co3O7P1.ICSD.51317     | insulator  | insulator |
| B1Co3.ICSD.44339         | metal      | metal     |
| B1Co3.ICSD.612882        | metal      | metal     |
| B1Co4Dy1.ICSD.612899     | metal      | metal     |
| B1Co4Er1.ICSD.612926     | metal      | metal     |
| B1Co4Ho1.ICSD.613107     | metal      | metal     |
| B1Co4La1.ICSD.613133     | metal      | metal     |
| B1Co4Nd1.ICSD.157353     | metal      | metal     |
| B1Co4Nd1.ICSD.97606      | metal      | metal     |
| B1Co4Pr1.ICSD.97722      | metal      | metal     |
| B1Co4Tb1.ICSD.613336     | metal      | metal     |
| B1Co4Y1.ICSD.51272       | metal      | metal     |

Supplementary Table 103. Five-fold cross validated predictions for the metal/insulator classification (95/598).

| system                   | calculated | predicted |
|--------------------------|------------|-----------|
| B1Co4Y1.ICSD.613437      | metal      | metal     |
| B1Cr1O3.ICSD.43311       | insulator  | insulator |
| B1Cr1O4Pb1.ICSD.97663    | insulator  | insulator |
| B1Cr1.ICSD.613479        | metal      | metal     |
| B1Cr2O12P3.ICSD.409459   | insulator  | insulator |
| B1Cr2.ICSD.188474        | metal      | metal     |
| B1Cr2.ICSD.76127         | metal      | metal     |
| B1Cr5Si3.ICSD.613552     | metal      | metal     |
| B1Cs1F4.ICSD.95828       | insulator  | insulator |
| B1Cs1H4.ICSD.27864       | metal      | metal     |
| B1Cs1Li2S3.ICSD.411530   | insulator  | insulator |
| B1Cs1Na2O3.ICSD.67524    | insulator  | insulator |
| B1Cs1Se3.ICSD.411342     | insulator  | insulator |
| B1Cs3P2.ICSD.300123      | insulator  | insulator |
| B1Cs3S3.ICSD.391170      | insulator  | insulator |
| B1Cu1Ir1.ICSD.75029      | metal      | metal     |
| B1Cu1S2.ICSD.156413      | insulator  | insulator |
| B1Cu1Se2.ICSD.613591     | insulator  | insulator |
| B1Cu2H5O6.ICSD.54883     | insulator  | insulator |
| B1Dy1Ni4.ICSD.613650     | metal      | metal     |
| B1Dy1O3.ICSD.59849       | insulator  | insulator |
| B1Dy1Pd3.ICSD.44210      | metal      | metal     |
| B1Dy1Rh3.ICSD.44211      | metal      | metal     |
| B1Dy3O9W1.ICSD.250419    | insulator  | insulator |
| B1Dy5Ge3.ICSD.613639     | metal      | metal     |
| B1Dy5Si3.ICSD.415746     | metal      | metal     |
| B1Er1Fe4.ICSD.44215      | metal      | metal     |
| B1Er1Ni4.ICSD.156976     | metal      | metal     |
| B1Er1Pd3.ICSD.44233      | metal      | metal     |
| B1Er1Rh3.ICSD.44237      | metal      | metal     |
| B1Eu1Pd3.ICSD.44241      | metal      | metal     |
| B1Eu1Rh3.ICSD.44242      | metal      | metal     |
| B1F1H4N1O4P1.ICSD.170949 | insulator  | insulator |
| B1F1N2Sr2.ICSD.50843     | insulator  | insulator |
| B1F3H4O2.ICSD.26551      | insulator  | insulator |
| B1F3Mg3O3.ICSD.4226      | insulator  | insulator |
| B1F3Na2O4S1.ICSD.424150  | insulator  | insulator |
| B1F3.ICSD.24783          | insulator  | insulator |
| B1F4H2N3S3.ICSD.201705   | insulator  | insulator |
| B1F4H3O1.ICSD.15591      | insulator  | insulator |
| B1F4H4N1.ICSD.93978      | insulator  | insulator |
| B1F4H5N2.ICSD.245055     | insulator  | insulator |
| B1F4In1.ICSD.50218       | insulator  | insulator |
| B1F4K1.ICSD.22260        | insulator  | insulator |
| B1F4Li1.ICSD.171375      | insulator  | insulator |
| B1F4N1O2.ICSD.240721     | insulator  | insulator |
| B1F4Na1.ICSD.30349       | insulator  | insulator |
| B1F4Rb1.ICSD.24016       | insulator  | insulator |
| B1F4Tl1.ICSD.300222      | insulator  | insulator |
| B1F5Li2.ICSD.426821      | insulator  | insulator |

Supplementary Table 104. Five-fold cross validated predictions for the metal/insulator classification (96/598).

| system                 | calculated | predicted |
|------------------------|------------|-----------|
| B1F7N2O1S2.ICSD.414492 | insulator  | insulator |
| B1F7S1.ICSD.10337      | insulator  | insulator |
| B1F7Sn2.ICSD.15263     | insulator  | insulator |
| B1F8N1.ICSD.165425     | insulator  | insulator |
| B1F8N1.ICSD.63311      | insulator  | insulator |
| B1F9Sn3.ICSD.15264     | insulator  | insulator |
| B1Fe1Nb1.ICSD.20298    | metal      | metal     |
| B1Fe1Nb1.ICSD.614046   | metal      | metal     |
| B1Fe1Ni2O5.ICSD.69615  | insulator  | insulator |
| B1Fe1O3.ICSD.34474     | insulator  | insulator |
| B1Fe1O4Pb1.ICSD.97668  | insulator  | insulator |
| B1Fe1Ta1.ICSD.614205   | metal      | metal     |
| B1Fe1W1.ICSD.614256    | metal      | metal     |
| B1Fe1.ICSD.391329      | metal      | metal     |
| B1Fe1.ICSD.613898      | metal      | metal     |
| B1Fe2Ni1.ICSD.614129   | metal      | metal     |
| B1Fe2O12P3.ICSD.260895 | insulator  | insulator |
| B1Fe2O4.ICSD.88450     | insulator  | insulator |
| B1Fe2.ICSD.160789      | metal      | metal     |
| B1Fe2.ICSD.160790      | metal      | metal     |
| B1Fe2.ICSD.16809       | metal      | metal     |
| B1Fe2.ICSD.613907      | metal      | metal     |
| B1Fe3O5.ICSD.164815    | insulator  | insulator |
| B1Fe3O5.ICSD.25101     | metal      | insulator |
| B1Fe3O6.ICSD.23863     | insulator  | insulator |
| B1Fe3.ICSD.184958      | metal      | metal     |
| B1Fe3.ICSD.260757      | metal      | metal     |
| B1Fe4Lu1.ICSD.614001   | metal      | metal     |
| B1Ga1O4Pb1.ICSD.279600 | insulator  | insulator |
| B1Gd1N2.ICSD.657369    | insulator  | insulator |
| B1Gd1O3.ICSD.87779     | insulator  | insulator |
| B1Gd1Pd3.ICSD.163775   | metal      | metal     |
| B1Gd1Pd3.ICSD.44309    | metal      | metal     |
| B1Gd1Rh3.ICSD.44310    | metal      | metal     |
| B1Gd1Rh3.ICSD.614376   | metal      | metal     |
| B1Gd3O9W1.ICSD.250417  | insulator  | insulator |
| B1Gd5Si3.ICSD.614390   | metal      | metal     |
| B1Ge1La1O5.ICSD.39262  | insulator  | insulator |
| B1Ge1Li1O4.ICSD.28106  | insulator  | insulator |
| B1Ge1Li1O4.ICSD.67535  | insulator  | insulator |
| B1Ge2K1O6.ICSD.281258  | insulator  | insulator |
| B1Ge2Ni6.ICSD.185118   | metal      | metal     |
| B1Ge3La5.ICSD.614396   | metal      | metal     |
| B1Ge3Nb5.ICSD.614400   | metal      | metal     |
| B1Ge3Ta5.ICSD.614404   | metal      | metal     |
| B1Ge3Tb5.ICSD.614406   | metal      | metal     |
| B1Ge3V5.ICSD.614407    | metal      | metal     |
| B1H10Li4N3.ICSD.161018 | insulator  | insulator |
| B1H1Li1.ICSD.153290    | metal      | insulator |
| B1H1Na2O3.ICSD.27211   | insulator  | insulator |

Supplementary Table 105. Five-fold cross validated predictions for the metal/insulator classification (97/598).

| system                      | calculated | predicted |
|-----------------------------|------------|-----------|
| B1H1O2.ICSD.34639           | insulator  | insulator |
| B1H2Li1.ICSD.153289         | insulator  | insulator |
| B1H2Na1O7Si2.ICSD.12134     | insulator  | insulator |
| B1H3In1Na1O10P2.ICSD.409585 | insulator  | insulator |
| B1H3Mg3O6.ICSD.250420       | insulator  | insulator |
| B1H3Na1O10P2V1.ICSD.409651  | insulator  | insulator |
| B1H3O3.ICSD.52290           | insulator  | insulator |
| B1H4K1.ICSD.160985          | insulator  | insulator |
| B1H4K1.ICSD.160986          | insulator  | insulator |
| B1H4Li1.ICSD.173101         | insulator  | insulator |
| B1H4Li1.ICSD.186262         | insulator  | insulator |
| B1H4Li1.ICSD.245569         | insulator  | insulator |
| B1H4Li1.ICSD.95207          | insulator  | insulator |
| B1H4N1O8P2Zn1.ICSD.410872   | insulator  | insulator |
| B1H4Na1O4.ICSD.167112       | insulator  | insulator |
| B1H4Na1.ICSD.159243         | insulator  | insulator |
| B1H4Na1.ICSD.181024         | insulator  | insulator |
| B1H4Na1.ICSD.182733         | insulator  | insulator |
| B1H4Na1.ICSD.182734         | insulator  | insulator |
| B1H4Na1.ICSD.261750         | insulator  | insulator |
| B1H4Na1.ICSD.261751         | insulator  | insulator |
| B1H5In1N1O9P2.ICSD.409584   | insulator  | insulator |
| B1H5Li1N1.ICSD.180548       | insulator  | insulator |
| B1H6N1.ICSD.165975          | insulator  | insulator |
| B1H6N1.ICSD.180547          | insulator  | insulator |
| B1H6N1.ICSD.181423          | insulator  | insulator |
| B1H7Li1N1.ICSD.169560       | insulator  | insulator |
| B1Hf1Rh3.ICSD.614447        | metal      | metal     |
| B1Hf1.ICSD.614418           | metal      | metal     |
| B1Hf9Mo4.ICSD.23788         | metal      | metal     |
| B1Hf9Os4.ICSD.614445        | metal      | metal     |
| B1Hf9Re4.ICSD.614446        | metal      | metal     |
| B1Ho1Ni4.ICSD.409500        | metal      | metal     |
| B1Ho1Pd3.ICSD.44417         | metal      | metal     |
| B1Ho1Rh3.ICSD.44418         | metal      | metal     |
| B1Ho5Si3.ICSD.415742        | metal      | metal     |
| B1I12Zr6.ICSD.202103        | metal      | insulator |
| B1I1N2Sr2.ICSD.50598        | insulator  | insulator |
| B1I3P4S3.ICSD.165187        | insulator  | insulator |
| B1I3.ICSD.28328             | insulator  | insulator |
| B1In1La3.ICSD.107021        | metal      | metal     |
| B1In1O3.ICSD.75254          | insulator  | insulator |
| B1In1Sc3.ICSD.44421         | metal      | metal     |
| B1In2O12P3.ICSD.420643      | insulator  | insulator |
| B1Ir1Li1.ICSD.75027         | metal      | metal     |
| B1Ir1Mg1.ICSD.409979        | metal      | metal     |
| B1Ir1Pd1.ICSD.75030         | metal      | metal     |
| B1Ir3Sc1.ICSD.44423         | metal      | metal     |
| B1Ir6Zr2.ICSD.421246        | metal      | metal     |
| B1K1Li2O3.ICSD.48177        | insulator  | insulator |

Supplementary Table 106. Five-fold cross validated predictions for the metal/insulator classification (98/598).

| system                 | calculated | predicted |
|------------------------|------------|-----------|
| B1K1Mg1O3.ICSD.174336  | insulator  | insulator |
| B1K1Na2O3.ICSD.33261   | insulator  | insulator |
| B1K1O6Si2.ICSD.380488  | insulator  | insulator |
| B1K2Li1O3.ICSD.60949   | insulator  | insulator |
| B1K2Na1P2.ICSD.300133  | insulator  | insulator |
| B1K3O13Sb4.ICSD.411501 | insulator  | insulator |
| B1K3P2.ICSD.300104     | insulator  | insulator |
| B1K3S3.ICSD.411607     | insulator  | insulator |
| B1La1N1Ni1.ICSD.77939  | metal      | metal     |
| B1La1Ni4.ICSD.170617   | metal      | metal     |
| B1La1O3.ICSD.15383     | insulator  | insulator |
| B1La1O5Si1.ICSD.83397  | insulator  | insulator |
| B1La1Pd3.ICSD.614637   | metal      | metal     |
| B1La1Pt2.ICSD.98425    | metal      | metal     |
| B1La1Rh3.ICSD.44430    | metal      | metal     |
| B1La3O9W1.ICSD.39809   | insulator  | insulator |
| B1Li1Mn1O3.ICSD.94318  | insulator  | insulator |
| B1Li1O2.ICSD.200891    | insulator  | insulator |
| B1Li1O2.ICSD.34256     | insulator  | insulator |
| B1Li1O3Sr1.ICSD.92842  | insulator  | insulator |
| B1Li1O4Si1.ICSD.67536  | insulator  | insulator |
| B1Li1Pt3.ICSD.68091    | metal      | metal     |
| B1Li1S3Sr1.ICSD.380105 | insulator  | insulator |
| B1Li1Si2.ICSD.425643   | insulator  | insulator |
| B1Li1.ICSD.153291      | metal      | metal     |
| B1Li2Pd3.ICSD.246447   | metal      | metal     |
| B1Li2Pt3.ICSD.246448   | metal      | metal     |
| B1Li3N2.ICSD.155126    | insulator  | insulator |
| B1Li3N2.ICSD.155129    | insulator  | insulator |
| B1Li3N2.ICSD.655673    | insulator  | insulator |
| B1Li3O3.ICSD.9105      | insulator  | insulator |
| B1Li3S3.ICSD.75223     | insulator  | insulator |
| B1Lu1O3.ICSD.16525     | metal      | insulator |
| B1Lu1Pd3.ICSD.44437    | metal      | metal     |
| B1Lu1Rh3.ICSD.44438    | metal      | metal     |
| B1Lu5Si3.ICSD.415737   | metal      | metal     |
| B1Mg1Na1O3.ICSD.249567 | insulator  | insulator |
| B1Mg3N3.ICSD.79623     | insulator  | insulator |
| B1Mg8Pt4.ICSD.245121   | metal      | metal     |
| B1Mg8Rh4.ICSD.249110   | metal      | metal     |
| B1Mn1O4Pb1.ICSD.97664  | insulator  | insulator |
| B1Mn1.ICSD.614725      | metal      | metal     |
| B1Mn1.ICSD.614742      | metal      | metal     |
| B1Mn2.ICSD.42529       | metal      | metal     |
| B1Mn2.ICSD.614741      | metal      | metal     |
| B1Mo1.ICSD.24280       | metal      | metal     |
| B1Mo1.ICSD.614812      | metal      | metal     |
| B1Mo2.ICSD.614814      | metal      | metal     |
| B1Mo4Zr9.ICSD.614862   | metal      | metal     |
| B1N1U1.ICSD.71067      | metal      | metal     |

Supplementary Table 107. Five-fold cross validated predictions for the metal/insulator classification (99/598).

| system                 | calculated | predicted |
|------------------------|------------|-----------|
| B1N1.ICSD.162871       | insulator  | insulator |
| B1N1.ICSD.162875       | insulator  | insulator |
| B1N1.ICSD.162876       | insulator  | insulator |
| B1N1.ICSD.162877       | insulator  | insulator |
| B1N1.ICSD.162880       | insulator  | insulator |
| B1N1.ICSD.162882       | insulator  | insulator |
| B1N1.ICSD.162883       | insulator  | insulator |
| B1N1.ICSD.186246       | insulator  | insulator |
| B1N1.ICSD.27986        | metal      | insulator |
| B1N1.ICSD.42002        | insulator  | insulator |
| B1N1.ICSD.614873       | insulator  | insulator |
| B1N2Na3.ICSD.68619     | insulator  | insulator |
| B1N2Nd1.ICSD.657367    | insulator  | insulator |
| B1N3Ta2.ICSD.182349    | metal      | metal     |
| B1Na1O2.ICSD.34645     | insulator  | insulator |
| B1Na1O3Sr1.ICSD.172420 | insulator  | insulator |
| B1Na1O4Si1.ICSD.39459  | insulator  | insulator |
| B1Na1Pt3.ICSD.68092    | metal      | metal     |
| B1Na2O3Rb1.ICSD.67525  | insulator  | insulator |
| B1Na3O3.ICSD.1351      | insulator  | insulator |
| B1Na3P2.ICSD.300124    | insulator  | insulator |
| B1Na3S3.ICSD.411608    | insulator  | insulator |
| B1Nb1Ni1.ICSD.614909   | metal      | metal     |
| B1Nb1Ni2O6.ICSD.32583  | insulator  | insulator |
| B1Nb1O4.ICSD.63202     | insulator  | insulator |
| B1Nb1.ICSD.614885      | metal      | metal     |
| B1Nb5Si3.ICSD.614916   | metal      | metal     |
| B1Nd1Ni4.ICSD.20882    | metal      | metal     |
| B1Nd1O3.ICSD.240380    | insulator  | insulator |
| B1Nd1O3.ICSD.412407    | insulator  | insulator |
| B1Nd1Pd3.ICSD.44463    | metal      | metal     |
| B1Nd1Pt2.ICSD.98426    | metal      | metal     |
| B1Nd1Pt3.ICSD.97371    | metal      | metal     |
| B1Nd1Rh3.ICSD.44464    | metal      | metal     |
| B1Nd1S3.ICSD.421073    | insulator  | insulator |
| B1Ni1Ta1.ICSD.615023   | metal      | metal     |
| B1Ni1.ICSD.26937       | metal      | metal     |
| B1Ni2.ICSD.603804      | metal      | metal     |
| B1Ni3.ICSD.106927      | metal      | metal     |
| B1Ni4Tb1.ICSD.156975   | metal      | metal     |
| B1Ni4Tm1.ICSD.44531    | metal      | metal     |
| B1Ni4U1.ICSD.615060    | metal      | metal     |
| B1Ni4Y1.ICSD.615076    | metal      | metal     |
| B1Ni4Yb1.ICSD.615088   | metal      | metal     |
| B1Ni6Si2.ICSD.185117   | metal      | metal     |
| B1O2Ti1.ICSD.36404     | insulator  | insulator |
| B1O3P1Sr3.ICSD.401207  | insulator  | insulator |
| B1O3Pr1.ICSD.421745    | insulator  | insulator |
| B1O3Sc1.ICSD.65010     | insulator  | insulator |
| B1O3Ti1.ICSD.402039    | metal      | insulator |

Supplementary Table 108. Five-fold cross validated predictions for the metal/insulator classification (100/598).

| system                   | calculated | predicted |
|--------------------------|------------|-----------|
| B1O3Ti3.ICSD_8084        | insulator  | insulator |
| B1O3V1.ICSD_45060        | insulator  | insulator |
| B1O3Y1.ICSD_44162        | insulator  | insulator |
| B1O3Yb1.ICSD_160141      | metal      | insulator |
| B1O3Yb1.ICSD_34663       | metal      | insulator |
| B1O4P1.ICSD_26890        | insulator  | insulator |
| B1O4P1.ICSD_413435       | insulator  | insulator |
| B1O4Ta1.ICSD_402404      | insulator  | insulator |
| B1O5P1Pb1.ICSD_93598     | insulator  | insulator |
| B1O5P1Sr1.ICSD_77519     | insulator  | insulator |
| B1O5P1Sr1.ICSD_97675     | insulator  | insulator |
| B1O7P1Zn3.ICSD_406386    | insulator  | insulator |
| B1O8P2Rb1Zn1.ICSD_410870 | insulator  | insulator |
| B1O9Tb3W1.ICSD_250418    | insulator  | insulator |
| B1Os1.ICSD_181304        | metal      | metal     |
| B1P1S4.ICSD_24618        | insulator  | insulator |
| B1P1.ICSD_184570         | insulator  | insulator |
| B1P1.ICSD_615155         | insulator  | insulator |
| B1P2Rb3.ICSD_402084      | insulator  | insulator |
| B1Pb1Sc3.ICSD_44541      | metal      | metal     |
| B1Pd2.ICSD_615164        | metal      | metal     |
| B1Pd3Pr1.ICSD_44543      | metal      | metal     |
| B1Pd3Tb1.ICSD_44545      | metal      | metal     |
| B1Pd3Tm1.ICSD_44546      | metal      | metal     |
| B1Pd3Yb1.ICSD_44547      | metal      | metal     |
| B1Pd3.ICSD_94235         | metal      | metal     |
| B1Pd4Sr1.ICSD_247263     | metal      | metal     |
| B1Pr1Pt3.ICSD_97370      | metal      | metal     |
| B1Pr1Pt4.ICSD_55454      | metal      | metal     |
| B1Pr1Rh3.ICSD_44548      | metal      | metal     |
| B1Pr1S3.ICSD_421072      | insulator  | insulator |
| B1Pt1.ICSD_24363         | metal      | metal     |
| B1Pt2Y1.ICSD_156947      | metal      | metal     |
| B1Pt2.ICSD_615207        | metal      | metal     |
| B1Pu1.ICSD_43661         | metal      | metal     |
| B1Rb1S3.ICSD_73084       | insulator  | insulator |
| B1Rb1Se3.ICSD_411343     | insulator  | insulator |
| B1Re3.ICSD_615241        | metal      | metal     |
| B1Re4Zr9.ICSD_615287     | metal      | metal     |
| B1Rh1.ICSD_150732        | metal      | metal     |
| B1Rh2.ICSD_24699         | metal      | metal     |
| B1Rh3Sc1.ICSD_44561      | metal      | metal     |
| B1Rh3Tb1.ICSD_44565      | metal      | metal     |
| B1Rh3Tm1.ICSD_44566      | metal      | metal     |
| B1Rh3Tm1.ICSD_615332     | metal      | metal     |
| B1Rh3U1.ICSD_615338      | metal      | metal     |
| B1Rh3Y1.ICSD_44568       | metal      | metal     |
| B1Rh3Yb1.ICSD_44570      | metal      | metal     |
| B1Rh3Yb1.ICSD_615350     | metal      | metal     |
| B1Rh3Zr1.ICSD_615353     | metal      | metal     |

Supplementary Table 109. Five-fold cross validated predictions for the metal/insulator classification (101/598).

| system                  | calculated | predicted |
|-------------------------|------------|-----------|
| B1Rh6Sn4.ICSD_77353     | metal      | metal     |
| B1Rh6Ti2.ICSD_415337    | metal      | metal     |
| B1S2Ti1.ICSD_71593      | insulator  | insulator |
| B1S3Tb1.ICSD_710042     | insulator  | insulator |
| B1S3Ti1.ICSD_73085      | insulator  | insulator |
| B1S3Ti3.ICSD_202528     | insulator  | insulator |
| B1Sb1.ICSD_184571       | insulator  | metal     |
| B1Sc3Sn1.ICSD_167913    | metal      | metal     |
| B1Sc3Ti1.ICSD_44586     | metal      | metal     |
| B1Se3Ti3.ICSD_40375     | insulator  | insulator |
| B1Si2Ti6.ICSD_98945     | metal      | metal     |
| B1Si3Tb5.ICSD_615438    | metal      | metal     |
| B1Sn3Zr5.ICSD_656289    | metal      | metal     |
| B1Ta1.ICSD_42954        | metal      | metal     |
| B1Ta2.ICSD_76744        | metal      | metal     |
| B1Ta4Te8.ICSD_410843    | metal      | metal     |
| B1Tc1.ICSD_168895       | metal      | metal     |
| B1Tc1.ICSD_168897       | metal      | metal     |
| B1Tc1.ICSD_168899       | metal      | metal     |
| B1Tc1.ICSD_168900       | metal      | metal     |
| B1Tc1.ICSD_168901       | metal      | metal     |
| B1Tc3.ICSD_615555       | metal      | metal     |
| B1Ti1.ICSD_44595        | metal      | metal     |
| B1Ti1.ICSD_615596       | metal      | metal     |
| B1Ti2.ICSD_189385       | metal      | metal     |
| B1V1.ICSD_615658        | metal      | metal     |
| B1W1.ICSD_24281         | metal      | metal     |
| B1W1.ICSD_615689        | metal      | metal     |
| B1W2.ICSD_24279         | metal      | metal     |
| B1W4Zr9.ICSD_615705     | metal      | metal     |
| B1Zr1.ICSD_44605        | metal      | metal     |
| B1.ICSD_189437          | metal      | metal     |
| B1.ICSD_22300           | metal      | metal     |
| B1.ICSD_240995          | metal      | metal     |
| B1.ICSD_659240          | insulator  | metal     |
| B20Na3.ICSD_410247      | metal      | metal     |
| B24Fe80Nb12.ICSD_164057 | metal      | metal     |
| B28.ICSD_164659         | insulator  | metal     |
| B2Ba1Be2O6.ICSD_67975   | insulator  | insulator |
| B2Ba1Cu1O5.ICSD_84683   | insulator  | insulator |
| B2Ba1F8.ICSD_240991     | insulator  | insulator |
| B2Ba1Ga2O7.ICSD_91280   | insulator  | insulator |
| B2Ba1Ir2.ICSD_612532    | metal      | metal     |
| B2Ba1O6Ti1.ICSD_183931  | insulator  | insulator |
| B2Ba1O6Zr1.ICSD_95527   | insulator  | insulator |
| B2Ba1Rh2.ICSD_8155      | metal      | metal     |
| B2Ba1S4.ICSD_412516     | insulator  | insulator |
| B2Ba1Se6.ICSD_411967    | insulator  | insulator |
| B2Ba2Ca1O6.ICSD_80429   | insulator  | insulator |
| B2Ba2Cd1O6.ICSD_180954  | insulator  | insulator |

Supplementary Table 110. Five-fold cross validated predictions for the metal/insulator classification (102/598).

| system                      | calculated | predicted |
|-----------------------------|------------|-----------|
| B2Ba2C11Gd1O6.ICSD.262073   | insulator  | insulator |
| B2Ba2C11Ho1O6.ICSD.65933    | insulator  | insulator |
| B2Ba2C11O6Y1.ICSD.262072    | insulator  | insulator |
| B2Ba2C11O6Yb1.ICSD.65934    | insulator  | insulator |
| B2Ba2Mg1O6.ICSD.75986       | insulator  | insulator |
| B2Ba3N4.ICSD.412663         | insulator  | insulator |
| B2Ba3O12Ti3.ICSD.99460      | insulator  | insulator |
| B2Ba4N4O1.ICSD.400338       | insulator  | insulator |
| B2Be1C2.ICSD.418618         | insulator  | insulator |
| B2Be1Ca1O5.ICSD.72520       | insulator  | insulator |
| B2Be1.ICSD.186762           | metal      | metal     |
| B2Be2Ca1F1K1O6.ICSD.183886  | insulator  | insulator |
| B2Be2Ca1F1Na1O6.ICSD.183885 | insulator  | insulator |
| B2Be2F1K1O6Sr1.ICSD.183887  | insulator  | insulator |
| B2Be2O7Sr2.ICSD.79025       | insulator  | insulator |
| B2Bi1F1O4.ICSD.172481       | insulator  | insulator |
| B2Bi2Ca1O7.ICSD.245016      | insulator  | insulator |
| B2Bi2O7Zn1.ICSD.152281      | insulator  | insulator |
| B2Br15Tb1O10.ICSD.410990    | metal      | insulator |
| B2Br3C3Ce6.ICSD.401744      | metal      | metal     |
| B2Br4Cl6N2P2.ICSD.412556    | insulator  | insulator |
| B2Br6C4Gd8.ICSD.401745      | metal      | metal     |
| B2C1Ce1Ir2.ICSD.95098       | metal      | metal     |
| B2C1Ce1Ni2.ICSD.56645       | metal      | metal     |
| B2C1Ce1Rh2.ICSD.95097       | metal      | metal     |
| B2C1Ce1.ICSD.40164          | metal      | metal     |
| B2C1Co2Pr1.ICSD.157583      | metal      | metal     |
| B2C1Co2Tm1.ICSD.164575      | metal      | metal     |
| B2C1Dy1Ni2.ICSD.79573       | metal      | metal     |
| B2C1Dy1Rh2.ICSD.150156      | metal      | metal     |
| B2C1Dy1.ICSD.42476          | metal      | metal     |
| B2C1Er1Ni2.ICSD.246431      | metal      | metal     |
| B2C1Er1Rh2.ICSD.150159      | metal      | metal     |
| B2C1Eu1Ni2.ICSD.79571       | metal      | metal     |
| B2C1Gd1Ni2.ICSD.79563       | metal      | metal     |
| B2C1Gd1Rh2.ICSD.150154      | metal      | metal     |
| B2C1Ho1Ni2.ICSD.56650       | metal      | metal     |
| B2C1Ho1Rh2.ICSD.150158      | metal      | metal     |
| B2C1Ho1.ICSD.41762          | metal      | metal     |
| B2C1Ir2La1.ICSD.79567       | metal      | metal     |
| B2C1La1Ni2.ICSD.79562       | metal      | metal     |
| B2C1La1Pt2.ICSD.79565       | metal      | metal     |
| B2C1La1Rh2.ICSD.150149      | metal      | metal     |
| B2C1Lu1Ni2.ICSD.79564       | metal      | metal     |
| B2C1Lu1.ICSD.44139          | metal      | metal     |
| B2C1N1.ICSD.183790          | metal      | metal     |
| B2C1N1.ICSD.183791          | metal      | metal     |
| B2C1N1.ICSD.183792          | metal      | metal     |
| B2C1N1.ICSD.183793          | metal      | metal     |
| B2C1N1.ICSD.183794          | metal      | metal     |

Supplementary Table 111. Five-fold cross validated predictions for the metal/insulator classification (103/598).

| system                 | calculated | predicted |
|------------------------|------------|-----------|
| B2C1Nd1Ni2.ICSD.79569  | metal      | metal     |
| B2C1Nd1Rh2.ICSD.150152 | metal      | metal     |
| B2C1Ni2Pr1.ICSD.157582 | metal      | metal     |
| B2C1Ni2Tb1.ICSD.89155  | metal      | metal     |
| B2C1Ni2Th1.ICSD.659009 | metal      | metal     |
| B2C1Ni2Tm1.ICSD.56652  | metal      | metal     |
| B2C1Ni2Y1.ICSD.83231   | metal      | metal     |
| B2C1Ni2Yb1.ICSD.56653  | metal      | metal     |
| B2C1Pr1Pt2.ICSD.157584 | metal      | metal     |
| B2C1Pr1Rh2.ICSD.150151 | metal      | metal     |
| B2C1Pt2Th1.ICSD.659011 | metal      | metal     |
| B2C1Rh2Tb1.ICSD.150155 | metal      | metal     |
| B2C1Rh2Th1.ICSD.659010 | metal      | metal     |
| B2C1Rh2U1.ICSD.659008  | metal      | metal     |
| B2C1Rh2Y1.ICSD.150157  | metal      | metal     |
| B2C1Sc1.ICSD.54104     | metal      | metal     |
| B2C1Tb1.ICSD.44141     | metal      | metal     |
| B2C1Th1.ICSD.68415     | metal      | metal     |
| B2C1Tm1.ICSD.41763     | metal      | metal     |
| B2C1U1.ICSD.44142      | metal      | metal     |
| B2C1U1.ICSD.69767      | metal      | metal     |
| B2C1Y1.ICSD.41761      | metal      | metal     |
| B2C2Ca1.ICSD.166515    | metal      | insulator |
| B2C2Ca1.ICSD.88019     | insulator  | metal     |
| B2C2Ce1.ICSD.603066    | metal      | metal     |
| B2C2Ce1.ICSD.88858     | metal      | metal     |
| B2C2Dy1.ICSD.42475     | metal      | metal     |
| B2C2Dy1.ICSD.88558     | metal      | metal     |
| B2C2Er1.ICSD.612593    | metal      | metal     |
| B2C2Er1.ICSD.94042     | metal      | metal     |
| B2C2Gd1.ICSD.612619    | metal      | metal     |
| B2C2Ho1.ICSD.612622    | metal      | metal     |
| B2C2Ho1.ICSD.94041     | metal      | metal     |
| B2C2La1.ICSD.612631    | metal      | metal     |
| B2C2La1.ICSD.94035     | metal      | metal     |
| B2C2Lu1.ICSD.94044     | metal      | metal     |
| B2C2Mg1.ICSD.421839    | insulator  | insulator |
| B2C2Mg1.ICSD.79587     | insulator  | insulator |
| B2C2Nd1.ICSD.612651    | metal      | metal     |
| B2C2Nd1.ICSD.88859     | metal      | metal     |
| B2C2Nd1.ICSD.88860     | metal      | metal     |
| B2C2Nd1.ICSD.94038     | metal      | metal     |
| B2C2Pr1.ICSD.612652    | metal      | metal     |
| B2C2Pr1.ICSD.94037     | metal      | metal     |
| B2C2Sc1.ICSD.23834     | metal      | metal     |
| B2C2Tb1.ICSD.612659    | metal      | metal     |
| B2C2Tb1.ICSD.94039     | metal      | metal     |
| B2C2Y1.ICSD.612672     | metal      | metal     |
| B2C2Yb1.ICSD.612680    | metal      | metal     |
| B2C3Tb2.ICSD.419476    | metal      | metal     |

Supplementary Table 112. Five-fold cross validated predictions for the metal/insulator classification (104/598).

| system                     | calculated | predicted |
|----------------------------|------------|-----------|
| B2C3Th3_ICSD_23077         | metal      | metal     |
| B2C5Dy5_ICSD_410896        | metal      | metal     |
| B2C6F8Fe1O6_ICSD_152380    | insulator  | insulator |
| B2C8Co1H4N8O2_ICSD_260263  | metal      | insulator |
| B2C8Cu1N8_ICSD_415546      | insulator  | insulator |
| B2C8Hg1N8_ICSD_412297      | insulator  | insulator |
| B2C8N8Zn1_ICSD_415547      | insulator  | insulator |
| B2Ca1H10N2_ICSD_246139     | insulator  | insulator |
| B2Ca1H12O10_ICSD_23016     | insulator  | insulator |
| B2Ca1H1_ICSD_168228        | metal      | metal     |
| B2Ca1H2_ICSD_163473        | metal      | metal     |
| B2Ca1H2_ICSD_168230        | metal      | metal     |
| B2Ca1H2_ICSD_183133        | insulator  | metal     |
| B2Ca1H2_ICSD_183134        | metal      | insulator |
| B2Ca1H3_ICSD_168232        | metal      | metal     |
| B2Ca1H3_ICSD_168233        | metal      | metal     |
| B2Ca1H8_ICSD_163262        | insulator  | insulator |
| B2Ca1H8_ICSD_163263        | insulator  | insulator |
| B2Ca1H8_ICSD_163480        | insulator  | insulator |
| B2Ca1H8_ICSD_164182        | insulator  | insulator |
| B2Ca1H8_ICSD_168224        | insulator  | insulator |
| B2Ca1H8_ICSD_168225        | insulator  | insulator |
| B2Ca1Ir2_ICSD_49738        | metal      | metal     |
| B2Ca1Li4O6_ICSD_99503      | insulator  | insulator |
| B2Ca1O4_ICSD_20097         | insulator  | insulator |
| B2Ca1O4_ICSD_23241         | insulator  | insulator |
| B2Ca1O6Sn1_ICSD_30998      | insulator  | insulator |
| B2Ca1O8Si2_ICSD_26491      | insulator  | insulator |
| B2Ca1Rh2_ICSD_49737        | metal      | metal     |
| B2Ca1Rh3_ICSD_66767        | metal      | metal     |
| B2Ca1_ICSD_186764          | metal      | metal     |
| B2Ca2O5_ICSD_66516         | insulator  | insulator |
| B2Ca3Ni7_ICSD_36505        | metal      | metal     |
| B2Ca3O6_ICSD_23664         | insulator  | insulator |
| B2Cd1F1K1O6Zn2_ICSD_248025 | insulator  | insulator |
| B2Cd1H8_ICSD_262600        | insulator  | insulator |
| B2Cd2O5_ICSD_200621        | insulator  | insulator |
| B2Cd2O5_ICSD_281357        | insulator  | insulator |
| B2Cd3O6_ICSD_66170         | insulator  | insulator |
| B2Ce1Cl1O4_ICSD_413236     | insulator  | insulator |
| B2Ce1Co3_ICSD_612737       | metal      | metal     |
| B2Ce1Co3_ICSD_612751       | metal      | metal     |
| B2Ce1Ir3_ICSD_97341        | metal      | metal     |
| B2Ce1Os2_ICSD_601367       | metal      | metal     |
| B2Ce1Rh3_ICSD_40777        | metal      | metal     |
| B2Ce1Rh3_ICSD_40778        | metal      | metal     |
| B2Ce1Rh3_ICSD_612827       | metal      | metal     |
| B2Ce1Ru1_ICSD_612853       | metal      | metal     |
| B2Ce1Ru2_ICSD_40799        | metal      | metal     |
| B2Ce1Ru2_ICSD_40800        | metal      | metal     |

Supplementary Table 113. Five-fold cross validated predictions for the metal/insulator classification (105/598).

| system                  | calculated | predicted |
|-------------------------|------------|-----------|
| B2Ce1Ru3_ICSD_612852    | metal      | metal     |
| B2Ce2Ir5_ICSD_97343     | metal      | metal     |
| B2Ce3Cl3O6_ICSD_413237  | insulator  | insulator |
| B2Ce3N4_ICSD_68610      | metal      | metal     |
| B2Ce4N5_ICSD_51538      | metal      | metal     |
| B2Cl1La1O4_ICSD_413209  | insulator  | insulator |
| B2Cl1O4Pr1_ICSD_95851   | insulator  | insulator |
| B2Cl4_ICSD_31693        | insulator  | insulator |
| B2Co1Ir5Mg2_ICSD_613129 | metal      | metal     |
| B2Co1Mo2_ICSD_613166    | metal      | metal     |
| B2Co1Nb1_ICSD_41893     | metal      | metal     |
| B2Co1O4_ICSD_422063     | insulator  | insulator |
| B2Co1W2_ICSD_16776      | metal      | metal     |
| B2Co2Dy1_ICSD_612907    | metal      | metal     |
| B2Co2Er1_ICSD_612925    | metal      | metal     |
| B2Co2Gd1_ICSD_602344    | metal      | metal     |
| B2Co2Ho1_ICSD_613114    | metal      | metal     |
| B2Co2La1_ICSD_423045    | metal      | metal     |
| B2Co2Nd1_ICSD_44168     | metal      | metal     |
| B2Co2Nd1_ICSD_613196    | metal      | metal     |
| B2Co2O5_ICSD_24284      | insulator  | insulator |
| B2Co2Tb1_ICSD_613330    | metal      | metal     |
| B2Co2Y1_ICSD_613423     | metal      | metal     |
| B2Co3Dy1_ICSD_612896    | metal      | metal     |
| B2Co3Er1_ICSD_612931    | metal      | metal     |
| B2Co3Gd1_ICSD_23656     | metal      | metal     |
| B2Co3Hf1_ICSD_23550     | metal      | metal     |
| B2Co3Hf1_ICSD_613106    | metal      | metal     |
| B2Co3Ho1_ICSD_87165     | metal      | metal     |
| B2Co3Lu1_ICSD_44171     | metal      | metal     |
| B2Co3O6_ICSD_24035      | insulator  | insulator |
| B2Co3Sc1_ICSD_44179     | metal      | metal     |
| B2Co3Tb1_ICSD_246511    | metal      | metal     |
| B2Co3U1_ICSD_44185      | metal      | metal     |
| B2Co3Y1_ICSD_659053     | metal      | metal     |
| B2Co3Yb1_ICSD_44189     | metal      | metal     |
| B2Co3Zr1_ICSD_16179     | metal      | metal     |
| B2Co3Zr1_ICSD_44191     | metal      | metal     |
| B2Co3Zr1_ICSD_613452    | metal      | metal     |
| B2Co5P1_ICSD_613222     | metal      | metal     |
| B2Co5Ti3_ICSD_20140     | metal      | metal     |
| B2Co7U3_ICSD_86379      | metal      | metal     |
| B2Cr1Ir5Mg2_ICSD_613516 | metal      | metal     |
| B2Cr1Nb2_ICSD_613529    | metal      | metal     |
| B2Cr1Rh5Sc2_ICSD_51435  | metal      | metal     |
| B2Cr1Ta2_ICSD_613557    | metal      | metal     |
| B2Cr1_ICSD_44194        | metal      | metal     |
| B2Cr2Ir1_ICSD_601518    | metal      | metal     |
| B2Cs1Li5O6_ICSD_61203   | insulator  | insulator |
| B2Cs1Nb1O6_ICSD_79703   | insulator  | insulator |

Supplementary Table 114. Five-fold cross validated predictions for the metal/insulator classification (106/598).

| system                     | calculated | predicted |
|----------------------------|------------|-----------|
| B2Cs1O6Ta1_ICSD_80423      | insulator  | insulator |
| B2Cs3Li2Na1O6_ICSD_36531   | insulator  | insulator |
| B2Cu1O4_ICSD_9087          | metal      | insulator |
| B2Cu1O6Pb2_ICSD_155317     | insulator  | insulator |
| B2Cu1O6Sr2_ICSD_202934     | insulator  | insulator |
| B2Cu2O6Sr1_ICSD_247206     | insulator  | insulator |
| B2Cu2O6Sr1_ICSD_247207     | insulator  | insulator |
| B2Cu2O6Sr1_ICSD_80592      | insulator  | insulator |
| B2Dy1Fe2_ICSD_613606       | metal      | metal     |
| B2Dy1Ir2_ICSD_613641       | metal      | metal     |
| B2Dy1Ir3_ICSD_613640       | metal      | metal     |
| B2Dy1Ni2_ICSD_613653       | metal      | metal     |
| B2Dy1Os1_ICSD_613666       | metal      | metal     |
| B2Dy1Rh3_ICSD_613675       | metal      | metal     |
| B2Dy1Ru1_ICSD_613687       | metal      | metal     |
| B2Dy1Ru3_ICSD_613684       | metal      | metal     |
| B2Dy1_ICSD_44205           | metal      | metal     |
| B2Dy3Ni13_ICSD_108041      | metal      | metal     |
| B2Dy3Ni7_ICSD_613658       | metal      | metal     |
| B2Er1Fe2_ICSD_44218        | metal      | metal     |
| B2Er1Fe2_ICSD_613745       | metal      | metal     |
| B2Er1Ir3_ICSD_44230        | metal      | metal     |
| B2Er1Ni2_ICSD_613779       | metal      | metal     |
| B2Er1Os1_ICSD_613789       | metal      | metal     |
| B2Er1Rh3_ICSD_72568        | metal      | metal     |
| B2Er1Ru1_ICSD_613819       | metal      | metal     |
| B2Er1Ru3_ICSD_44238        | metal      | metal     |
| B2Er1_ICSD_613696          | metal      | metal     |
| B2Er3Ni13_ICSD_601073      | metal      | metal     |
| B2Er3Ni7_ICSD_44231        | metal      | metal     |
| B2Eu1Rh3_ICSD_44243        | metal      | metal     |
| B2Eu3O6_ICSD_86479         | insulator  | insulator |
| B2F10H1Nd1_ICSD_420467     | insulator  | insulator |
| B2F10H1Pr1_ICSD_420466     | insulator  | insulator |
| B2F3Gd3O6_ICSD_51140       | insulator  | insulator |
| B2F4_ICSD_27867            | insulator  | insulator |
| B2F8H6N2_ICSD_49614        | insulator  | insulator |
| B2Fe1Ir5Sc2_ICSD_85631     | metal      | metal     |
| B2Fe1Mo2_ICSD_44292        | metal      | metal     |
| B2Fe1Nb2_ICSD_614047       | metal      | metal     |
| B2Fe1O4_ICSD_420403        | insulator  | insulator |
| B2Fe1Rh5Sc2_ICSD_51437     | metal      | metal     |
| B2Fe1Ta2_ICSD_614207       | metal      | metal     |
| B2Fe1W2_ICSD_43016         | metal      | metal     |
| B2Fe1W2_ICSD_614261        | metal      | metal     |
| B2Fe1_ICSD_425310          | insulator  | metal     |
| B2Fe1_ICSD_613892          | metal      | metal     |
| B2Fe2Gd1_ICSD_613920       | metal      | metal     |
| B2Fe2H2K2O18P4_ICSD_407797 | insulator  | insulator |
| B2Fe2Ho1_ICSD_613974       | metal      | metal     |

Supplementary Table 115. Five-fold cross validated predictions for the metal/insulator classification (107/598).

| system                       | calculated | predicted |
|------------------------------|------------|-----------|
| B2Fe2Lu1_ICSD_604549         | metal      | metal     |
| B2Fe2Tb1_ICSD_614209         | metal      | metal     |
| B2Fe2Y1_ICSD_614264          | metal      | metal     |
| B2Fe3U1_ICSD_44302           | metal      | metal     |
| B2Fe5P1_ICSD_601531          | metal      | metal     |
| B2Fe5Si1_ICSD_614183         | metal      | metal     |
| B2Ga1Rh5Sc2_ICSD_51438       | metal      | metal     |
| B2Ga2K2O7_ICSD_50039         | insulator  | insulator |
| B2Ga2O7Sr1_ICSD_91279        | insulator  | insulator |
| B2Ga6Ge6H8Na8O24_ICSD_188639 | insulator  | insulator |
| B2Gd1Os1_ICSD_614363         | metal      | metal     |
| B2Gd1Rh3_ICSD_44311          | metal      | metal     |
| B2Gd1Ru1_ICSD_614386         | metal      | metal     |
| B2Gd1Ru2_ICSD_601355         | metal      | metal     |
| B2Gd1Ru3_ICSD_44312          | metal      | metal     |
| B2Gd1_ICSD_614307            | metal      | metal     |
| B2Ge1Mg2Rh5_ICSD_51432       | metal      | metal     |
| B2H16Na2O14_ICSD_30532       | insulator  | insulator |
| B2H4Li2O8_ICSD_100854        | insulator  | insulator |
| B2H6_ICSD_1312               | insulator  | insulator |
| B2H6_ICSD_413919             | insulator  | insulator |
| B2H8K1Li1_ICSD_173236        | insulator  | insulator |
| B2H8K1Na1_ICSD_163376        | insulator  | insulator |
| B2H8K1Na1_ICSD_163377        | insulator  | insulator |
| B2H8K1Na1_ICSD_163378        | insulator  | insulator |
| B2H8K1Na1_ICSD_163379        | insulator  | insulator |
| B2H8Mg1_ICSD_155717          | insulator  | insulator |
| B2H8Mg1_ICSD_161140          | insulator  | insulator |
| B2H8Mg1_ICSD_187436          | insulator  | insulator |
| B2H8Mg1_ICSD_187440          | insulator  | insulator |
| B2H8Mg1_ICSD_187459          | insulator  | insulator |
| B2H8Mg1_ICSD_262083          | insulator  | insulator |
| B2H8Zn1_ICSD_161376          | insulator  | insulator |
| B2Hf1_ICSD_167823            | metal      | metal     |
| B2Hf3Ir5_ICSD_44316          | metal      | metal     |
| B2Hg3O6_ICSD_409688          | insulator  | insulator |
| B2Ho1Ir3_ICSD_614472         | metal      | metal     |
| B2Ho1Ni2_ICSD_39487          | metal      | metal     |
| B2Ho1Os1_ICSD_614489         | metal      | metal     |
| B2Ho1Rh3_ICSD_614497         | metal      | metal     |
| B2Ho1Ru1_ICSD_614509         | metal      | metal     |
| B2Ho1Ru3_ICSD_614506         | metal      | metal     |
| B2Ho1_ICSD_44320             | metal      | metal     |
| B2Ho3Ni13_ICSD_601055        | metal      | metal     |
| B2Ho3Ni7_ICSD_614478         | metal      | metal     |
| B2Ir1Mo2_ICSD_23786          | metal      | metal     |
| B2Ir1V2_ICSD_601555          | metal      | metal     |
| B2Ir2La1_ICSD_614525         | metal      | metal     |
| B2Ir2Sr1_ICSD_8154           | metal      | metal     |
| B2Ir2Tb1_ICSD_614567         | metal      | metal     |

Supplementary Table 116. Five-fold cross validated predictions for the metal/insulator classification (108/598).

| system                  | calculated | predicted |
|-------------------------|------------|-----------|
| B2Ir2Zn1_ICSD_71642     | metal      | metal     |
| B2Ir3La1_ICSD_44422     | metal      | metal     |
| B2Ir3Lu1_ICSD_614531    | metal      | metal     |
| B2Ir3Nd1_ICSD_614546    | metal      | metal     |
| B2Ir3Pr1_ICSD_97342     | metal      | metal     |
| B2Ir3Pu1_ICSD_600578    | metal      | metal     |
| B2Ir3Sc1_ICSD_614561    | metal      | metal     |
| B2Ir3Tb1_ICSD_614566    | metal      | metal     |
| B2Ir3Th1_ICSD_44425     | metal      | metal     |
| B2Ir3U1_ICSD_44426      | metal      | metal     |
| B2Ir3Y1_ICSD_99236      | metal      | metal     |
| B2Ir3Yb1_ICSD_614581    | metal      | metal     |
| B2Ir5Mg2Mn1_ICSD_614533 | metal      | metal     |
| B2Ir5Mg2Si1_ICSD_69487  | metal      | metal     |
| B2Ir5Sc2Si1_ICSD_85629  | metal      | metal     |
| B2Ir5Sc2V1_ICSD_85630   | metal      | metal     |
| B2Ir6Sn5_ICSD_78984     | metal      | metal     |
| B2K1O6Ta1_ICSD_162214   | insulator  | insulator |
| B2K2La2O7_ICSD_174543   | insulator  | insulator |
| B2K2O6Zr1_ICSD_67982    | insulator  | insulator |
| B2K3Nb3O12_ICSD_85091   | insulator  | insulator |
| B2K3Nb3O12_ICSD_968     | insulator  | insulator |
| B2K3O12Ta3_ICSD_201143  | insulator  | insulator |
| B2K3O6Y1_ICSD_245925    | insulator  | insulator |
| B2La1Os2_ICSD_601366    | metal      | metal     |
| B2La1Rh3_ICSD_614643    | metal      | metal     |
| B2La1Ru2_ICSD_601360    | metal      | metal     |
| B2La1Ru3_ICSD_44433     | metal      | metal     |
| B2La3N4_ICSD_407033     | metal      | metal     |
| B2La5N6_ICSD_410980     | metal      | metal     |
| B2Li2Rh3_ICSD_417442    | metal      | metal     |
| B2Li2S5_ICSD_401723     | insulator  | insulator |
| B2Li2Se5_ICSD_411410    | insulator  | insulator |
| B2Li2_ICSD_1            | metal      | metal     |
| B2Li2_ICSD_2            | metal      | metal     |
| B2Li3O6Sc1_ICSD_241234  | insulator  | insulator |
| B2Li3O6Sc1_ICSD_261256  | insulator  | insulator |
| B2Lu1Os3_ICSD_44435     | metal      | metal     |
| B2Lu1Rh3_ICSD_614701    | metal      | metal     |
| B2Lu1Ru3_ICSD_44439     | metal      | metal     |
| B2Lu1_ICSD_57002        | metal      | metal     |
| B2Mg1Ni3_ICSD_156018    | metal      | metal     |
| B2Mg1Ni6.7_ICSD_44442   | metal      | metal     |
| B2Mg1O6Sn1_ICSD_28266   | insulator  | insulator |
| B2Mg1O6Sr2_ICSD_240897  | insulator  | insulator |
| B2Mg1_ICSD_96906        | metal      | metal     |
| B2Mg2O5_ICSD_24789      | insulator  | insulator |
| B2Mg2O5_ICSD_81229      | insulator  | insulator |
| B2Mg3Mn3O10_ICSD_30654  | metal      | insulator |
| B2Mg3O6_ICSD_24036      | insulator  | insulator |

Supplementary Table 117. Five-fold cross validated predictions for the metal/insulator classification (109/598).

| system                 | calculated | predicted |
|------------------------|------------|-----------|
| B2Mn1Mo2_ICSD_614755   | metal      | metal     |
| B2Mn1O6Sn1_ICSD_79165  | insulator  | insulator |
| B2Mn1Rh5Sc2_ICSD_51436 | metal      | metal     |
| B2Mn1W2_ICSD_44449     | metal      | metal     |
| B2Mn1_ICSD_43664       | metal      | metal     |
| B2Mn5P1_ICSD_109111    | metal      | metal     |
| B2Mo1_ICSD_418398      | metal      | metal     |
| B2Mo1_ICSD_76410       | metal      | metal     |
| B2Mo2Nb1_ICSD_614821   | metal      | metal     |
| B2Mo2Ni1_ICSD_43192    | metal      | metal     |
| B2Mo2Os1_ICSD_614829   | metal      | metal     |
| B2Mo2Ru1_ICSD_601573   | metal      | metal     |
| B2Mo2Ta1_ICSD_614842   | metal      | metal     |
| B2Mo3_ICSD_614800      | metal      | metal     |
| B2Mo5Si1_ICSD_614839   | metal      | metal     |
| B2N4Nd3_ICSD_407576    | metal      | metal     |
| B2N4Pr3_ICSD_407282    | metal      | metal     |
| B2Na1O5Sc1_ICSD_409522 | insulator  | insulator |
| B2Na2S5_ICSD_401724    | insulator  | insulator |
| B2Na3O6Sc1_ICSD_262733 | insulator  | insulator |
| B2Na4O5_ICSD_10061     | insulator  | insulator |
| B2Nb1Ni1_ICSD_614910   | metal      | metal     |
| B2Nb1_ICSD_614884      | metal      | metal     |
| B2Nb3_ICSD_614907      | metal      | metal     |
| B2Nd1Os2_ICSD_601369   | metal      | metal     |
| B2Nd1Rh3_ICSD_614963   | metal      | metal     |
| B2Nd1Ru3_ICSD_614966   | metal      | metal     |
| B2Ni13Tb3_ICSD_44468   | metal      | metal     |
| B2Ni13Y3_ICSD_246557   | metal      | metal     |
| B2Ni13Yb3_ICSD_603509  | metal      | metal     |
| B2Ni1O4_ICSD_418385    | insulator  | insulator |
| B2Ni1Ta1_ICSD_100435   | metal      | metal     |
| B2Ni1W2_ICSD_615069    | metal      | metal     |
| B2Ni2Tb1_ICSD_57003    | metal      | metal     |
| B2Ni2Y1_ICSD_615079    | metal      | metal     |
| B2Ni3O6_ICSD_2016      | insulator  | insulator |
| B2Ni3Zn1_ICSD_261932   | metal      | metal     |
| B2Ni6.67Sn1_ICSD_44466 | metal      | metal     |
| B2Ni6.67Zn1_ICSD_44536 | metal      | metal     |
| B2Ni7Tb3_ICSD_615028   | metal      | metal     |
| B2Ni7Y3_ICSD_615073    | metal      | metal     |
| B2O1_ICSD_41670        | metal      | insulator |
| B2O3_ICSD_24649        | insulator  | insulator |
| B2O3_ICSD_36066        | insulator  | insulator |
| B2O4Sr1_ICSD_203226    | insulator  | insulator |
| B2O4Sr1_ICSD_69102     | insulator  | insulator |
| B2O5Sr2_ICSD_50739     | insulator  | insulator |
| B2O5Zr1_ICSD_418931    | insulator  | insulator |
| B2O6Pb1Zn2_ICSD_171139 | insulator  | insulator |
| B2O6Sn1Sr1_ICSD_28267  | insulator  | insulator |

Supplementary Table 118. Five-fold cross validated predictions for the metal/insulator classification (110/598).

| system                | calculated | predicted |
|-----------------------|------------|-----------|
| B2O6Sr3.ICSD.93395    | insulator  | insulator |
| B2O6U1.ICSD.248127    | insulator  | insulator |
| B2O6U1.ICSD.49908     | insulator  | insulator |
| B2O7Se2.ICSD.172383   | insulator  | insulator |
| B2O8Si2Sr1.ICSD.83368 | insulator  | insulator |
| B2O9S2.ICSD.426544    | insulator  | insulator |
| B2Os1Pu1.ICSD.601842  | metal      | metal     |
| B2Os1Sc1.ICSD.615126  | metal      | metal     |
| B2Os1Tb1.ICSD.615131  | metal      | metal     |
| B2Os1Y1.ICSD.615149   | metal      | metal     |
| B2Os1Yb1.ICSD.615151  | metal      | metal     |
| B2Os1.ICSD.615117     | metal      | metal     |
| B2Os2Pr1.ICSD.601368  | metal      | metal     |
| B2Os2Th1.ICSD.601346  | metal      | metal     |
| B2Os3U1.ICSD.44539    | metal      | metal     |
| B2Pd5.ICSD.43513      | metal      | metal     |
| B2Pd7Y1.ICSD.260147   | metal      | metal     |
| B2Pr1Rh3.ICSD.44550   | metal      | metal     |
| B2Pr1Rh3.ICSD.615187  | metal      | metal     |
| B2Pr1Rh3.ICSD.615193  | metal      | metal     |
| B2Pr1Ru2.ICSD.601361  | metal      | metal     |
| B2Pr1Ru3.ICSD.44551   | metal      | metal     |
| B2Pu1Re1.ICSD.603981  | metal      | metal     |
| B2Pu1Rh3.ICSD.600567  | metal      | metal     |
| B2Pu1Ru1.ICSD.603992  | metal      | metal     |
| B2Pu1Tc1.ICSD.603980  | metal      | metal     |
| B2Pu1.ICSD.43660      | metal      | metal     |
| B2Re1Ti2.ICSD.44554   | metal      | metal     |
| B2Re1.ICSD.421522     | metal      | metal     |
| B2Rh2Sr1.ICSD.8153    | metal      | metal     |
| B2Rh3Tb1.ICSD.615319  | metal      | metal     |
| B2Rh3Y1.ICSD.615340   | metal      | metal     |
| B2Rh3Yb1.ICSD.615348  | metal      | metal     |
| B2Rh5Sc3.ICSD.51434   | metal      | metal     |
| B2Rh6Sn5.ICSD.77352   | metal      | metal     |
| B2Ru1Tb1.ICSD.615373  | metal      | metal     |
| B2Ru1Y1.ICSD.615399   | metal      | metal     |
| B2Ru1.ICSD.421524     | metal      | metal     |
| B2Ru2Th1.ICSD.601365  | metal      | metal     |
| B2Ru3Tb1.ICSD.615376  | metal      | metal     |
| B2Ru3Th1.ICSD.44574   | metal      | metal     |
| B2Ru3Tm1.ICSD.44576   | metal      | metal     |
| B2Ru3U1.ICSD.44579    | metal      | metal     |
| B2Ru3Y1.ICSD.659500   | metal      | metal     |
| B2Ru3Yb1.ICSD.44583   | metal      | metal     |
| B2S4Sr1.ICSD.71594    | insulator  | insulator |
| B2S6Sr3.ICSD.412879   | insulator  | insulator |
| B2Sc1.ICSD.106903     | metal      | metal     |
| B2Sc1.ICSD.615426     | metal      | metal     |
| B2Si1V5.ICSD.615439   | metal      | metal     |

Supplementary Table 119. Five-fold cross validated predictions for the metal/insulator classification (111/598).

| system                      | calculated | predicted |
|-----------------------------|------------|-----------|
| B2Ta1.ICSD.615525           | metal      | metal     |
| B2Ta3.ICSD.107320           | metal      | metal     |
| B2Tb1.ICSD.615535           | metal      | metal     |
| B2Tc1.ICSD.615553           | metal      | metal     |
| B2Ti1.ICSD.56723            | metal      | metal     |
| B2Tm1.ICSD.44598            | metal      | metal     |
| B2U1.ICSD.615636            | metal      | metal     |
| B2V1.ICSD.30417             | metal      | metal     |
| B2V3.ICSD.615662            | metal      | metal     |
| B2W1.ICSD.23716             | metal      | metal     |
| B2W1.ICSD.44601             | metal      | metal     |
| B2Y1.ICSD.44602             | metal      | metal     |
| B2Yb1.ICSD.44604            | metal      | metal     |
| B2Zr1.ICSD.615755           | metal      | metal     |
| B3Ba1Li1S6.ICSD.82353       | insulator  | insulator |
| B3Ba4N6Na1.ICSD.401210      | insulator  | insulator |
| B3Ba5Br1O9.ICSD.422557      | insulator  | insulator |
| B3Ba5C1N1O9.ICSD.414486     | insulator  | insulator |
| B3Ba5C11O9.ICSD.422556      | insulator  | insulator |
| B3Be2K1O7.ICSD.248202       | insulator  | insulator |
| B3Be2K1O7.ICSD.248203       | insulator  | insulator |
| B3Be2O7Rb1.ICSD.248205      | insulator  | insulator |
| B3Be3F4Na1O9Sr3.ICSD.423143 | insulator  | insulator |
| B3Bi1O6.ICSD.245893         | insulator  | insulator |
| B3Bi1O6.ICSD.416822         | insulator  | insulator |
| B3Br1La2.ICSD.417603        | metal      | metal     |
| B3C2Gd2.ICSD.67980          | metal      | metal     |
| B3C2Y2.ICSD.90269           | metal      | metal     |
| B3C4Gd4.ICSD.280354         | metal      | metal     |
| B3Ca1H7O9.ICSD.75922        | insulator  | insulator |
| B3Ca4Gd1O10.ICSD.86172      | insulator  | insulator |
| B3Ca4K1O9.ICSD.171422       | insulator  | insulator |
| B3Ca4La1O10.ICSD.180596     | insulator  | insulator |
| B3Ca4Li1N6.ICSD.83419       | insulator  | insulator |
| B3Ca4Na1O9.ICSD.171421      | insulator  | insulator |
| B3Ca5F1O9.ICSD.65763        | insulator  | insulator |
| B3Ce1O6.ICSD.413903         | insulator  | insulator |
| B3Ce1O6.ICSD.99691          | insulator  | insulator |
| B3Cl1Eu5O9.ICSD.422555      | insulator  | insulator |
| B3Cl1La2.ICSD.417604        | metal      | metal     |
| B3Cl1O9Sr5.ICSD.71871       | insulator  | insulator |
| B3Cl1Pr2.ICSD.410727        | metal      | metal     |
| B3Cl6N3.ICSD.14276          | insulator  | insulator |
| B3Co1Mo3.ICSD.613173        | metal      | metal     |
| B3Co1V1.ICSD.44188          | metal      | metal     |
| B3Co1W3.ICSD.25753          | metal      | metal     |
| B3Co7Dy2.ICSD.612905        | metal      | metal     |
| B3Co7Er2.ICSD.612929        | metal      | metal     |
| B3Co7Ho2.ICSD.613119        | metal      | metal     |
| B3Co7Tb2.ICSD.613342        | metal      | metal     |

Supplementary Table 120. Five-fold cross validated predictions for the metal/insulator classification (112/598).

| system                 | calculated | predicted |
|------------------------|------------|-----------|
| B3Co7Y2.ICSD.613431    | metal      | metal     |
| B3Co7Y2.ICSD.656888    | metal      | metal     |
| B3Cr2.ICSD.601350      | metal      | metal     |
| B3Cr5.ICSD.613474      | metal      | metal     |
| B3Cs1H8.ICSD.65947     | insulator  | insulator |
| B3Er1Mo1.ICSD.65932    | metal      | metal     |
| B3Eu4Li1N6.ICSD.400465 | insulator  | insulator |
| B3Gd1O6.ICSD.8083      | insulator  | insulator |
| B3Ge2Ni8.ICSD.54011    | metal      | metal     |
| B3H12Y1.ICSD.169076    | insulator  | insulator |
| B3H2Na3O7.ICSD.1939    | insulator  | insulator |
| B3H3O14Zn8.ICSD.416894 | insulator  | insulator |
| B3H6N3.ICSD.401085     | insulator  | insulator |
| B3Ir4Zn1.ICSD.71640    | metal      | metal     |
| B3Ir7Sn4.ICSD.78985    | metal      | metal     |
| B3Ir7Zn5.ICSD.107494   | metal      | metal     |
| B3K1O6Zn1.ICSD.174357  | insulator  | insulator |
| B3K3O6.ICSD.16005      | insulator  | insulator |
| B3K3S6.ICSD.79614      | insulator  | insulator |
| B3La1O6.ICSD.20355     | insulator  | insulator |
| B3La2Na3O9.ICSD.151884 | insulator  | insulator |
| B3La3N6.ICSD.410598    | insulator  | insulator |
| B3Li1N6Sr4.ICSD.402173 | insulator  | insulator |
| B3Li1O5.ICSD.415200    | insulator  | insulator |
| B3Li1S6Sr1.ICSD.79616  | insulator  | insulator |
| B3Mo1.ICSD.167734      | metal      | metal     |
| B3Mo3Ni1.ICSD.614824   | metal      | metal     |
| B3N6Na1Sr4.ICSD.92577  | insulator  | insulator |
| B3Na3O9Sc2.ICSD.245063 | insulator  | insulator |
| B3Na3S6.ICSD.79613     | insulator  | insulator |
| B3Nb2.ICSD.656213      | metal      | metal     |
| B3Nd1O6.ICSD.20075     | insulator  | insulator |
| B3Ni1W3.ICSD.615070    | metal      | metal     |
| B3Ni4.ICSD.150560      | metal      | metal     |
| B3Ni4.ICSD.187403      | metal      | metal     |
| B3O5Rb1.ICSD.91545     | insulator  | insulator |
| B3O5Ti1.ICSD.84855     | insulator  | insulator |
| B3O6Pr1.ICSD.95850     | insulator  | insulator |
| B3O6Rb3.ICSD.59826     | insulator  | insulator |
| B3O9Rb1Zn4.ICSD.92616  | insulator  | insulator |
| B3O9Sc1Sr3.ICSD.75339  | insulator  | insulator |
| B3Os2.ICSD.424879      | metal      | metal     |
| B3Rb3S6.ICSD.79615     | insulator  | insulator |
| B3Re1U1.ICSD.68001     | metal      | metal     |
| B3Re1.ICSD.24361       | metal      | metal     |
| B3Re7.ICSD.615242      | metal      | metal     |
| B3Rh7Zn5.ICSD.107495   | metal      | metal     |
| B3Rh7.ICSD.615290      | metal      | metal     |
| B3Ru2.ICSD.108082      | metal      | metal     |
| B3Ru2.ICSD.23715       | metal      | metal     |

Supplementary Table 121. Five-fold cross validated predictions for the metal/insulator classification (113/598).

| system                     | calculated | predicted |
|----------------------------|------------|-----------|
| B3Ru7.ICSD.44343           | metal      | metal     |
| B3Si1.ICSD.412621          | insulator  | metal     |
| B3V2.ICSD.79258            | metal      | metal     |
| B4Ba2O11Sc2.ICSD.86436     | insulator  | insulator |
| B4Ba5F2O10.ICSD.73905      | insulator  | insulator |
| B4Bi2Cu5O14.ICSD.260046    | metal      | insulator |
| B4C1Cl6O1.ICSD.280617      | insulator  | insulator |
| B4C1Dy2.ICSD.418403        | metal      | metal     |
| B4C2Ca4H6Mg1O18.ICSD.80438 | insulator  | insulator |
| B4Ca1O7.ICSD.412710        | insulator  | insulator |
| B4Ca2Rh5.ICSD.66768        | metal      | metal     |
| B4Ce1Co4.ICSD.16193        | metal      | metal     |
| B4Ce1Co4.ICSD.654433       | metal      | metal     |
| B4Ce1Cr1.ICSD.612757       | metal      | metal     |
| B4Ce1Fe4.ICSD.612769       | metal      | metal     |
| B4Ce1Ni1.ICSD.612813       | metal      | metal     |
| B4Ce1O12Sc3.ICSD.90839     | metal      | insulator |
| B4Ce1Os4.ICSD.612815       | metal      | metal     |
| B4Ce1Re1.ICSD.81494        | metal      | metal     |
| B4Ce1Rh4.ICSD.612831       | metal      | metal     |
| B4Ce1Ru4.ICSD.421307       | metal      | metal     |
| B4Ce1.ICSD.417745          | metal      | metal     |
| B4Cl4.ICSD.27872           | insulator  | insulator |
| B4Cl5La4.ICSD.418483       | metal      | metal     |
| B4Co11Dy3.ICSD.97730       | metal      | metal     |
| B4Co11Y3.ICSD.613415       | metal      | metal     |
| B4Co1Gd1.ICSD.613074       | metal      | metal     |
| B4Co1O7.ICSD.420402        | insulator  | insulator |
| B4Co1Sc1.ICSD.613278       | metal      | metal     |
| B4Co1U1.ICSD.613378        | metal      | metal     |
| B4Co2Mo1.ICSD.44175        | metal      | metal     |
| B4Co4Ho1.ICSD.613122       | metal      | metal     |
| B4Co4Nd1.ICSD.2372         | metal      | metal     |
| B4Co4U1.ICSD.86377         | metal      | metal     |
| B4Cr1Dy1.ICSD.658658       | metal      | metal     |
| B4Cr1Gd1.ICSD.613512       | metal      | metal     |
| B4Cr1Ho1.ICSD.613514       | metal      | metal     |
| B4Cr1Pr1.ICSD.613542       | metal      | metal     |
| B4Cr1Tb1.ICSD.613559       | metal      | metal     |
| B4Cr1Th1.ICSD.81542        | metal      | metal     |
| B4Cr1U1.ICSD.613562        | metal      | metal     |
| B4Cr1Y1.ICSD.16171         | metal      | metal     |
| B4Cr1.ICSD.186851          | metal      | metal     |
| B4Cr1.ICSD.423380          | metal      | metal     |
| B4Cr3.ICSD.40791           | metal      | metal     |
| B4Cu1Er2O10.ICSD.401710    | insulator  | insulator |
| B4Cu1Ho2O10.ICSD.408029    | insulator  | insulator |
| B4Cu1Li6O10.ICSD.249215    | insulator  | insulator |
| B4Cu1O7.ICSD.391408        | insulator  | insulator |
| B4Dy1Fe1.ICSD.613623       | metal      | metal     |

Supplementary Table 122. Five-fold cross validated predictions for the metal/insulator classification (114/598).

| system                  | calculated | predicted |
|-------------------------|------------|-----------|
| B4Dy1Mn1_ICSD_613643    | metal      | metal     |
| B4Dy1Mo1_ICSD_613645    | insulator  | insulator |
| B4Dy1Ni1_ICSD_613662    | metal      | metal     |
| B4Dy1Os1_ICSD_613664    | metal      | metal     |
| B4Dy1Re1_ICSD_613671    | metal      | metal     |
| B4Dy1Rh4_ICSD_613679    | metal      | metal     |
| B4Dy1Ru1_ICSD_613685    | metal      | metal     |
| B4Dy1Ru4_ICSD_613688    | metal      | metal     |
| B4Dy1V1_ICSD_613693     | metal      | metal     |
| B4Dy1W1_ICSD_613694     | insulator  | insulator |
| B4Dy1_ICSD_68306        | metal      | metal     |
| B4Er1Fe1_ICSD_613744    | metal      | metal     |
| B4Er1Ir4_ICSD_659488    | metal      | metal     |
| B4Er1Mn1_ICSD_613773    | metal      | metal     |
| B4Er1Mo1_ICSD_613775    | insulator  | metal     |
| B4Er1Ni1_ICSD_20894     | metal      | metal     |
| B4Er1Ni1_ICSD_613777    | metal      | metal     |
| B4Er1Os1_ICSD_613787    | metal      | metal     |
| B4Er1Re1_ICSD_613797    | metal      | metal     |
| B4Er1Rh1_ICSD_603852    | metal      | metal     |
| B4Er1Rh4_ICSD_49631     | metal      | metal     |
| B4Er1Ru1_ICSD_613817    | metal      | metal     |
| B4Er1Ru4_ICSD_613822    | metal      | metal     |
| B4Er1V1_ICSD_613825     | metal      | metal     |
| B4Er1W1_ICSD_613826     | insulator  | insulator |
| B4Er1_ICSD_68650        | metal      | metal     |
| B4Eu1Ir4_ICSD_44239     | metal      | metal     |
| B4Eu2Rh5_ICSD_68540     | metal      | metal     |
| B4Fe1Gd1_ICSD_613941    | metal      | metal     |
| B4Fe1O7_ICSD_420401     | insulator  | insulator |
| B4Fe1Sc1_ICSD_614180    | metal      | metal     |
| B4Fe1U1_ICSD_614250     | metal      | metal     |
| B4Fe1Yb1_ICSD_603709    | metal      | metal     |
| B4Fe1_ICSD_425311       | metal      | metal     |
| B4Fe2Mo1_ICSD_44293     | metal      | metal     |
| B4Fe3La1O12_ICSD_83506  | insulator  | insulator |
| B4Fe3Nd1O12_ICSD_83507  | insulator  | insulator |
| B4Fe3O12Tb1_ICSD_96455  | insulator  | insulator |
| B4Ga2Li6O12_ICSD_9987   | insulator  | insulator |
| B4Ga3Nd1O12_ICSD_200321 | insulator  | insulator |
| B4Gd1Mn1_ICSD_614344    | metal      | metal     |
| B4Gd1Mo1_ICSD_614347    | insulator  | insulator |
| B4Gd1Ni1_ICSD_614359    | metal      | metal     |
| B4Gd1Os1_ICSD_614361    | metal      | metal     |
| B4Gd1Re1_ICSD_614368    | metal      | metal     |
| B4Gd1Rh4_ICSD_601532    | metal      | metal     |
| B4Gd1Ru1_ICSD_614384    | metal      | metal     |
| B4Gd1V1_ICSD_614392     | metal      | metal     |
| B4Gd1W1_ICSD_614393     | insulator  | insulator |
| B4H16Hf1_ICSD_35379     | insulator  | insulator |

Supplementary Table 123. Five-fold cross validated predictions for the metal/insulator classification (115/598).

| system                  | calculated | predicted |
|-------------------------|------------|-----------|
| B4H16Na1Sc1_ICSD_166748 | insulator  | insulator |
| B4H16U1_ICSD_63132      | insulator  | insulator |
| B4Hf1Ir3_ICSD_614432    | metal      | metal     |
| B4Hg1O7_ICSD_415347     | insulator  | insulator |
| B4Ho1Mn1_ICSD_614473    | metal      | metal     |
| B4Ho1Mo1_ICSD_614475    | insulator  | insulator |
| B4Ho1Ni1_ICSD_614485    | metal      | metal     |
| B4Ho1Os1_ICSD_614487    | metal      | metal     |
| B4Ho1Re1_ICSD_614493    | metal      | metal     |
| B4Ho1Rh4_ICSD_601533    | metal      | metal     |
| B4Ho1Ru1_ICSD_614507    | metal      | metal     |
| B4Ho1Ru4_ICSD_614511    | metal      | metal     |
| B4Ho1V1_ICSD_658656     | metal      | metal     |
| B4Ho1W1_ICSD_614514     | insulator  | insulator |
| B4Ho1_ICSD_109318       | metal      | metal     |
| B4Ho2Ni1O10_ICSD_404814 | insulator  | insulator |
| B4In5Ir9_ICSD_249113    | metal      | metal     |
| B4Ir3Sc1_ICSD_44424     | metal      | metal     |
| B4Ir3Zr1_ICSD_614583    | metal      | metal     |
| B4Ir4La1_ICSD_614523    | metal      | metal     |
| B4Ir4Nd1_ICSD_100351    | metal      | metal     |
| B4Ir4Tb1_ICSD_614568    | metal      | metal     |
| B4Ir4Y1_ICSD_614580     | metal      | metal     |
| B4La1O12Sc3_ICSD_83405  | insulator  | insulator |
| B4La1O12Sc3_ICSD_89012  | insulator  | insulator |
| B4La1O12Sc3_ICSD_89013  | insulator  | insulator |
| B4La1Re4_ICSD_614640    | metal      | metal     |
| B4La1Ru4_ICSD_8078      | metal      | metal     |
| B4La1_ICSD_2360         | metal      | metal     |
| B4La2Ni5_ICSD_170618    | metal      | metal     |
| B4La2Rh5_ICSD_68539     | metal      | metal     |
| B4Li2O7_ICSD_163177     | insulator  | insulator |
| B4Lu1Ni1_ICSD_614685    | metal      | metal     |
| B4Lu1Os1_ICSD_614693    | metal      | metal     |
| B4Lu1Ru1_ICSD_614714    | metal      | metal     |
| B4Lu1_ICSD_109319       | metal      | metal     |
| B4Mg1Os3_ICSD_91243     | metal      | metal     |
| B4Mg2Ru5_ICSD_61039     | metal      | metal     |
| B4Mn1O7_ICSD_391409     | insulator  | insulator |
| B4Mn1Tb1_ICSD_614776    | metal      | metal     |
| B4Mn1U1_ICSD_614778     | metal      | metal     |
| B4Mn1Y1_ICSD_614788     | metal      | metal     |
| B4Mn1_ICSD_15079        | metal      | metal     |
| B4Mn2W1_ICSD_614782     | metal      | metal     |
| B4Mn3_ICSD_614732       | metal      | metal     |
| B4Mn4_ICSD_74985        | metal      | metal     |
| B4Mo1Pu1_ICSD_614831    | metal      | metal     |
| B4Mo1Tb1_ICSD_614843    | insulator  | insulator |
| B4Mo1Th1_ICSD_108898    | metal      | metal     |
| B4Mo1U1_ICSD_614851     | metal      | metal     |

Supplementary Table 124. Five-fold cross validated predictions for the metal/insulator classification (116/598).

| system                 | calculated | predicted |
|------------------------|------------|-----------|
| B4Mo1U1.ICSD.614852    | metal      | metal     |
| B4Mo1Y1.ICSD.20081     | insulator  | metal     |
| B4Mo1.ICSD.167735      | metal      | metal     |
| B4Mo1.ICSD.182095      | metal      | metal     |
| B4Nb3.ICSD.656212      | metal      | metal     |
| B4Nd1Os4.ICSD.86393    | metal      | metal     |
| B4Nd1Rh4.ICSD.601574   | metal      | metal     |
| B4Nd1.ICSD.154656      | metal      | metal     |
| B4Nd1.ICSD.93225       | metal      | metal     |
| B4Nd2Ni5.ICSD.63510    | metal      | metal     |
| B4Ni1O7.ICSD.391407    | insulator  | insulator |
| B4Ni1Sc1.ICSD.84184    | metal      | metal     |
| B4Ni1Tb1.ICSD.615041   | metal      | metal     |
| B4Ni1U1.ICSD.615063    | metal      | metal     |
| B4Ni1Y1.ICSD.615085    | metal      | metal     |
| B4Ni1Yb1.ICSD.603710   | metal      | metal     |
| B4O11Sc2Sr2.ICSD.86435 | insulator  | insulator |
| B4O7Pb1.ICSD.185672    | insulator  | insulator |
| B4O7Sn1.ICSD.249206    | insulator  | insulator |
| B4O7Sr1.ICSD.27404     | insulator  | insulator |
| B4O7Zn1.ICSD.412688    | insulator  | insulator |
| B4Os1Pu1.ICSD.615123   | metal      | metal     |
| B4Os1Pu1.ICSD.615124   | metal      | metal     |
| B4Os1Tb1.ICSD.615129   | metal      | metal     |
| B4Os1U1.ICSD.615139    | metal      | metal     |
| B4Os1Y1.ICSD.615147    | metal      | metal     |
| B4Os1Yb1.ICSD.615150   | metal      | metal     |
| B4Os3Sc1.ICSD.91244    | metal      | metal     |
| B4Os5Sc2.ICSD.603725   | metal      | metal     |
| B4Pr1Rh4.ICSD.615190   | metal      | metal     |
| B4Pr1Ru4.ICSD.421308   | metal      | metal     |
| B4Pr1.ICSD.108073      | metal      | metal     |
| B4Pu1Re1.ICSD.615226   | metal      | metal     |
| B4Pu1Ru1.ICSD.615230   | metal      | metal     |
| B4Pu1Ru1.ICSD.615231   | metal      | metal     |
| B4Pu1Tc1.ICSD.615233   | metal      | metal     |
| B4Pu1W1.ICSD.615235    | metal      | metal     |
| B4Pu1.ICSD.43659       | metal      | metal     |
| B4Re1Tb1.ICSD.615250   | metal      | metal     |
| B4Re1Th1.ICSD.615254   | metal      | metal     |
| B4Re1U1.ICSD.615261    | metal      | metal     |
| B4Re1U1.ICSD.615262    | metal      | metal     |
| B4Re1Y1.ICSD.615278    | metal      | metal     |
| B4Re4Y1.ICSD.615286    | metal      | metal     |
| B4Rh1Y1.ICSD.419358    | metal      | metal     |
| B4Rh1Yb1.ICSD.419361   | metal      | metal     |
| B4Rh4Tb1.ICSD.615322   | metal      | metal     |
| B4Rh4Th1.ICSD.601578   | metal      | metal     |
| B4Rh4Y1.ICSD.615346    | metal      | metal     |
| B4Rh5Sr2.ICSD.66769    | metal      | metal     |

Supplementary Table 125. Five-fold cross validated predictions for the metal/insulator classification (117/598).

| system                      | calculated | predicted |
|-----------------------------|------------|-----------|
| B4Rh5.ICSD.86395            | metal      | metal     |
| B4Rh8Zn5.ICSD.417990        | metal      | metal     |
| B4Ru1Tb1.ICSD.615371        | metal      | metal     |
| B4Ru1U1.ICSD.615390         | metal      | metal     |
| B4Ru1Y1.ICSD.615400         | metal      | metal     |
| B4Ru1Yb1.ICSD.615408        | metal      | metal     |
| B4Ru4Y1.ICSD.615406         | metal      | metal     |
| B4Ta3.ICSD.602946           | metal      | metal     |
| B4Tb1V1.ICSD.615551         | metal      | metal     |
| B4Tb1W1.ICSD.615552         | insulator  | insulator |
| B4Tb1.ICSD.67223            | metal      | metal     |
| B4Th1V1.ICSD.615586         | metal      | metal     |
| B4Th1W1.ICSD.615588         | metal      | metal     |
| B4Th1.ICSD.81545            | metal      | metal     |
| B4Ti3.ICSD.615598           | metal      | metal     |
| B4Tm1.ICSD.109209           | metal      | metal     |
| B4U1V1.ICSD.615644          | metal      | metal     |
| B4U1W1.ICSD.615649          | metal      | metal     |
| B4U1W1.ICSD.615650          | metal      | metal     |
| B4U1.ICSD.24681             | metal      | metal     |
| B4V1Y1.ICSD.615679          | metal      | metal     |
| B4V3.ICSD.615668            | metal      | metal     |
| B4W1Y1.ICSD.615702          | insulator  | metal     |
| B4W1.ICSD.615683            | metal      | metal     |
| B4W1.ICSD.615684            | metal      | metal     |
| B4Y1.ICSD.26777             | metal      | metal     |
| B5Ba2Li1O10.ICSD.71875      | insulator  | insulator |
| B5Ca1Cl1H2O10Sr1.ICSD.91540 | insulator  | insulator |
| B5Ca1Na3O10.ICSD.61165      | insulator  | insulator |
| B5Ca2Cl1H2O10.ICSD.100261   | insulator  | insulator |
| B5Ca2Cl1H2O10.ICSD.74548    | insulator  | insulator |
| B5Ca2Os3.ICSD.59229         | metal      | metal     |
| B5Ca3La3O15.ICSD.93394      | insulator  | insulator |
| B5Cs2Li3O10.ICSD.180730     | insulator  | insulator |
| B5Cu1O10Tb1.ICSD.401453     | insulator  | insulator |
| B5Eu2Os3.ICSD.59228         | metal      | metal     |
| B5Gd2.ICSD.62067            | metal      | metal     |
| B5H12N1O12.ICSD.90001       | insulator  | insulator |
| B5H2Li3O10.ICSD.20155       | insulator  | insulator |
| B5H8K1O12.ICSD.6292         | insulator  | insulator |
| B5H9.ICSD.24636             | insulator  | insulator |
| B5Mo2.ICSD.167733           | metal      | metal     |
| B5Mo2.ICSD.614810           | metal      | metal     |
| B5Na3O10Sr1.ICSD.260005     | insulator  | insulator |
| B5Na3Pt9.ICSD.68093         | metal      | metal     |
| B5Nd2.ICSD.154655           | metal      | metal     |
| B5W2.ICSD.20326             | metal      | metal     |
| B5W2.ICSD.615696            | metal      | metal     |
| B6Ba1Ni12.ICSD.100287       | metal      | metal     |
| B6Ba1.ICSD.612529           | metal      | metal     |

Supplementary Table 126. Five-fold cross validated predictions for the metal/insulator classification (118/598).

| system                  | calculated | predicted |
|-------------------------|------------|-----------|
| B6Ba2Ca1O12.ICSD_30890  | insulator  | insulator |
| B6Ba2Cd1O12.ICSD_425704 | insulator  | insulator |
| B6Ba2Co1O12.ICSD_391014 | insulator  | insulator |
| B6Ba2Mg1O12.ICSD_290356 | insulator  | insulator |
| B6Ba2Mn1O12.ICSD_391013 | insulator  | insulator |
| B6Ba2Ni9.ICSD_100288    | metal      | metal     |
| B6Ba2O12Zn1.ICSD_404486 | insulator  | insulator |
| B6Ba3Ge2O16.ICSD_261403 | insulator  | insulator |
| B6Br1K3O10.ICSD_172400  | insulator  | insulator |
| B6Ca1Ni12.ICSD_36507    | metal      | metal     |
| B6Ca1.ICSD_44985        | metal      | metal     |
| B6Ca2Ni21.ICSD_612695   | metal      | metal     |
| B6Ca3Rh8.ICSD_66770     | metal      | metal     |
| B6Ce1Co12.ICSD_612736   | metal      | metal     |
| B6Ce1Cr2.ICSD_81544     | metal      | metal     |
| B6Ce1.ICSD_612715       | metal      | metal     |
| B6Ce2Ni21.ICSD_44151    | metal      | metal     |
| B6Ce2Re3.ICSD_612821    | metal      | metal     |
| B6Co12Dy1.ICSD_612901   | metal      | metal     |
| B6Co12Er1.ICSD_612920   | metal      | metal     |
| B6Co12La1.ICSD_656613   | metal      | metal     |
| B6Co12Pr1.ICSD_613225   | metal      | metal     |
| B6Co12Tb1.ICSD_613339   | metal      | metal     |
| B6Co12Y1.ICSD_613420    | metal      | metal     |
| B6Co20Ga3.ICSD_613040   | metal      | metal     |
| B6Co20In3.ICSD_613126   | metal      | metal     |
| B6Co20Ti3.ICSD_613353   | metal      | metal     |
| B6Co20V3.ICSD_613386    | metal      | metal     |
| B6Co21Ga2.ICSD_613042   | metal      | metal     |
| B6Co21Ge2.ICSD_613090   | metal      | metal     |
| B6Co21Hf2.ICSD_613099   | metal      | metal     |
| B6Co21In2.ICSD_613127   | metal      | metal     |
| B6Co21Mn2.ICSD_613157   | metal      | metal     |
| B6Co21Mo2.ICSD_108036   | metal      | metal     |
| B6Co21Nb2.ICSD_613174   | metal      | metal     |
| B6Co21Sb2.ICSD_613274   | metal      | metal     |
| B6Co21Sc2.ICSD_613281   | metal      | metal     |
| B6Co21Ta2.ICSD_613326   | metal      | metal     |
| B6Co21Ti2.ICSD_613352   | metal      | metal     |
| B6Co21U2.ICSD_44187     | metal      | metal     |
| B6Co21V2.ICSD_613383    | metal      | metal     |
| B6Co21W2.ICSD_613397    | metal      | metal     |
| B6Co21Zr2.ICSD_44192    | metal      | metal     |
| B6Co22In1.ICSD_613128   | metal      | metal     |
| B6Co22Sb1.ICSD_613275   | metal      | metal     |
| B6Co23.ICSD_419735      | metal      | metal     |
| B6Co4O13.ICSD_96561     | insulator  | insulator |
| B6Cr1H16.ICSD_170564    | insulator  | insulator |
| B6Cr1Sc2.ICSD_99646     | metal      | metal     |
| B6Cr2Nd1.ICSD_613532    | metal      | metal     |

Supplementary Table 127. Five-fold cross validated predictions for the metal/insulator classification (119/598).

| system                 | calculated | predicted |
|------------------------|------------|-----------|
| B6Cr2Th1.ICSD_81543    | metal      | metal     |
| B6Cs1Li1O10.ICSD_75995 | insulator  | insulator |
| B6Cs2H6.ICSD_65508     | insulator  | insulator |
| B6Cs2O10.ICSD_25815    | insulator  | insulator |
| B6Dy1Ni12.ICSD_613649  | metal      | metal     |
| B6Dy1.ICSD_613601      | metal      | metal     |
| B6Dy2Ni3.ICSD_613652   | metal      | metal     |
| B6Dy2Os1.ICSD_603479   | metal      | metal     |
| B6Dy2Ru1.ICSD_603488   | metal      | metal     |
| B6Dy4Fe3.ICSD_613611   | metal      | metal     |
| B6Dy4O15.ICSD_412041   | insulator  | insulator |
| B6Er1.ICSD_613715      | metal      | metal     |
| B6Er2Ni21.ICSD_613776  | metal      | metal     |
| B6Er2Ni3.ICSD_655633   | metal      | metal     |
| B6Er2Os1.ICSD_603495   | metal      | metal     |
| B6Er2Ru1.ICSD_603499   | metal      | metal     |
| B6Eu1Ni12.ICSD_86371   | metal      | metal     |
| B6Eu1.ICSD_613830      | metal      | metal     |
| B6Eu1.ICSD_613840      | metal      | metal     |
| B6Eu1.ICSD_613842      | metal      | metal     |
| B6Eu1.ICSD_613846      | metal      | metal     |
| B6Eu1.ICSD_86268       | metal      | metal     |
| B6Fe12La1.ICSD_656612  | metal      | metal     |
| B6Fe23.ICSD_54786      | metal      | metal     |
| B6Fe2U1.ICSD_167153    | metal      | metal     |
| B6Fe3Ni20.ICSD_614125  | metal      | metal     |
| B6Fe3Pr4.ICSD_614152   | metal      | metal     |
| B6Fe3Tb4.ICSD_614214   | metal      | metal     |
| B6Fe3Y4.ICSD_614271    | metal      | metal     |
| B6Ga2Ni21.ICSD_614302  | metal      | metal     |
| B6Ga3Ni20.ICSD_421820  | metal      | metal     |
| B6Gd1.ICSD_76125       | metal      | metal     |
| B6Gd2Os1.ICSD_603503   | metal      | metal     |
| B6Gd2Re3.ICSD_614372   | metal      | metal     |
| B6H10.ICSD_43253       | insulator  | insulator |
| B6H5K2N1O2.ICSD_67890  | insulator  | insulator |
| B6H6K2.ICSD_65507      | insulator  | insulator |
| B6Hf2Ni21.ICSD_614444  | metal      | metal     |
| B6Hf3Ni20.ICSD_614442  | metal      | metal     |
| B6Ho1.ICSD_614466      | metal      | metal     |
| B6Ho2Ni3.ICSD_614480   | metal      | metal     |
| B6Ho2Os1.ICSD_603477   | metal      | metal     |
| B6Ho2Ru1.ICSD_603498   | metal      | metal     |
| B6Ho4O15.ICSD_412991   | insulator  | insulator |
| B6In2Ni21.ICSD_380216  | metal      | metal     |
| B6K1.ICSD_98987        | metal      | metal     |
| B6La1Ni12.ICSD_39323   | metal      | metal     |
| B6La1.ICSD_614595      | metal      | metal     |
| B6La3Ru8.ICSD_159927   | metal      | metal     |
| B6Lu1.ICSD_614680      | metal      | metal     |

Supplementary Table 128. Five-fold cross validated predictions for the metal/insulator classification (120/598).

| system                   | calculated | predicted |
|--------------------------|------------|-----------|
| B6Lu2Ni3.ICSD_68002      | metal      | metal     |
| B6Mn2Ni21.ICSD_614758    | metal      | metal     |
| B6Mn3Ni20.ICSD_614760    | metal      | metal     |
| B6Na2O11Zn1.ICSD_167333  | insulator  | insulator |
| B6Nd1.ICSD_614939        | metal      | metal     |
| B6Nd2Re3.ICSD_614953     | metal      | metal     |
| B6Ni12Sr1.ICSD_100286    | metal      | metal     |
| B6Ni12Tb1.ICSD_44476     | metal      | metal     |
| B6Ni12Tb1.ICSD_615029    | metal      | metal     |
| B6Ni12Y1.ICSD_615075     | metal      | metal     |
| B6Ni20Sc3.ICSD_615002    | metal      | metal     |
| B6Ni20Ta3.ICSD_615021    | metal      | metal     |
| B6Ni20Ti3.ICSD_615043    | metal      | metal     |
| B6Ni20V3.ICSD_615065     | metal      | metal     |
| B6Ni20Zr3.ICSD_615099    | metal      | metal     |
| B6Ni21Sb2.ICSD_614998    | metal      | metal     |
| B6Ni21Sc2.ICSD_409959    | metal      | metal     |
| B6Ni21Sn2.ICSD_109112    | metal      | metal     |
| B6Ni21Ta2.ICSD_615022    | metal      | metal     |
| B6Ni21Ti2.ICSD_615045    | metal      | metal     |
| B6Ni21U2.ICSD_44533      | metal      | metal     |
| B6Ni21Yb2.ICSD_615087    | metal      | metal     |
| B6Ni21Zr2.ICSD_44193     | metal      | metal     |
| B6Ni23.ICSD_54787        | metal      | metal     |
| B6Ni3Tb2.ICSD_615033     | metal      | metal     |
| B6Ni3Tm2.ICSD_615052     | metal      | metal     |
| B6Ni3Y2.ICSD_615078      | metal      | metal     |
| B6Ni3Yb2.ICSD_39394      | metal      | metal     |
| B6O13Zn4.ICSD_100290     | insulator  | insulator |
| B6O18Sc1Sr6Y1.ICSD_67648 | insulator  | insulator |
| B6O1.ICSD_71065          | insulator  | insulator |
| B6Os1Tb2.ICSD_603504     | metal      | metal     |
| B6Os1Y2.ICSD_603494      | metal      | metal     |
| B6Os1Yb2.ICSD_603702     | metal      | metal     |
| B6Os8Y3.ICSD_417473      | metal      | metal     |
| B6Pr1.ICSD_615181        | metal      | metal     |
| B6Pr2Re3.ICSD_86366      | metal      | metal     |
| B6Pu1.ICSD_615214        | metal      | metal     |
| B6Re1Y2.ICSD_16187       | metal      | metal     |
| B6Rh1Sc2.ICSD_152716     | metal      | metal     |
| B6Rh8Sr3.ICSD_66771      | metal      | metal     |
| B6Ru1Tb2.ICSD_603496     | metal      | metal     |
| B6Ru1Y2.ICSD_603493      | metal      | metal     |
| B6Ru1Yb2.ICSD_603501     | metal      | metal     |
| B6Si1.ICSD_20240         | insulator  | metal     |
| B6Sr1.ICSD_615493        | metal      | metal     |
| B6Tb1.ICSD_615549        | metal      | metal     |
| B6Th1.ICSD_615568        | metal      | metal     |
| B6Tm1.ICSD_615612        | metal      | metal     |
| B6Y1.ICSD_615714         | metal      | metal     |

Supplementary Table 129. Five-fold cross validated predictions for the metal/insulator classification (121/598).

| system                  | calculated | predicted |
|-------------------------|------------|-----------|
| B6Yb1.ICSD_615747       | metal      | metal     |
| B7Br1Cu3O13.ICSD_201347 | insulator  | insulator |
| B7Br1Mn3O13.ICSD_80420  | insulator  | insulator |
| B7Cl1Co3O13.ICSD_158297 | insulator  | insulator |
| B7Cl1Cr3O13.ICSD_4231   | insulator  | insulator |
| B7Cl1Mg3O13.ICSD_30351  | insulator  | insulator |
| B7Cl1O13Zn3.ICSD_55444  | insulator  | insulator |
| B7Co4Nb3.ICSD_62282     | metal      | metal     |
| B7Cr1Er3.ICSD_62630     | metal      | metal     |
| B7Cr1Ho3.ICSD_56994     | metal      | metal     |
| B7Cr3I1O13.ICSD_62178   | insulator  | insulator |
| B7Cu3I1O13.ICSD_61058   | insulator  | insulator |
| B7Dy3Fe1.ICSD_613612    | metal      | metal     |
| B7Dy3Mn1.ICSD_39509     | metal      | metal     |
| B7Dy3Re1.ICSD_613670    | metal      | metal     |
| B7Dy3W1.ICSD_656435     | metal      | metal     |
| B7Er3Fe1.ICSD_613731    | metal      | metal     |
| B7Er3Mn1.ICSD_613774    | metal      | metal     |
| B7Er3Re1.ICSD_613796    | metal      | metal     |
| B7Er3W1.ICSD_656437     | metal      | metal     |
| B7Fe1Ho3.ICSD_613979    | metal      | metal     |
| B7Fe1Tb3.ICSD_614215    | metal      | metal     |
| B7Fe1Y3.ICSD_64596      | metal      | metal     |
| B7Fe3I1O13.ICSD_78420   | insulator  | insulator |
| B7Gd3Mn1.ICSD_614343    | metal      | metal     |
| B7Gd3Re1.ICSD_614367    | metal      | metal     |
| B7Gd3W1.ICSD_656433     | metal      | metal     |
| B7Ho1Mo3.ICSD_39943     | metal      | metal     |
| B7Ho3Mn1.ICSD_614474    | metal      | metal     |
| B7Ho3Re1.ICSD_614492    | metal      | metal     |
| B7Ho3W1.ICSD_656436     | metal      | metal     |
| B7I1Ni3O13.ICSD_27946   | insulator  | insulator |
| B7Mn1Tb3.ICSD_614777    | metal      | metal     |
| B7Mn1Y3.ICSD_614789     | metal      | metal     |
| B7Mo3Y1.ICSD_39873      | metal      | metal     |
| B7Re1Tb3.ICSD_615249    | metal      | metal     |
| B7Re1Y3.ICSD_2475       | metal      | metal     |
| B7Re1Y3.ICSD_64595      | metal      | metal     |
| B7Tb3W1.ICSD_656434     | metal      | metal     |
| B7W1Y3.ICSD_39663       | metal      | metal     |
| B8Ca1H4O15.ICSD_250323  | insulator  | insulator |
| B8Cu1Ho2O16.ICSD_408028 | metal      | insulator |
| B8La9Na3O27.ICSD_95753  | insulator  | insulator |
| B8Nb7Ru6.ICSD_263041    | metal      | metal     |
| B8Ru11.ICSD_43663       | metal      | metal     |
| B8Ru7Sr2.ICSD_33848     | metal      | metal     |
| B8S16.ICSD_15267        | insulator  | insulator |
| B9Ba1Li1O15.ICSD_93013  | insulator  | insulator |
| B9Ba1Na1O15.ICSD_93014  | insulator  | insulator |
| B9Li1.ICSD_164625       | metal      | metal     |

Supplementary Table 130. Five-fold cross validated predictions for the metal/insulator classification (122/598).

| system                      | calculated | predicted |
|-----------------------------|------------|-----------|
| B9Mg1N1.ICSD.280938         | insulator  | metal     |
| Ba10N12Ti4.ICSD.79102       | insulator  | insulator |
| Ba10O24P6S1.ICSD.410785     | insulator  | insulator |
| Ba11Bi10.ICSD.51797         | metal      | metal     |
| Ba11Bi14Cd8.ICSD.240338     | metal      | metal     |
| Ba11Cd6Sb12.ICSD.418886     | metal      | metal     |
| Ba11In6O3.ICSD.416096       | metal      | metal     |
| Ba11Sb10.ICSD.413518        | metal      | insulator |
| Ba12Li8N6Na15.ICSD.417928   | metal      | metal     |
| Ba14Ca1N6Na14.ICSD.81845    | metal      | metal     |
| Ba14Li1N6Na14.ICSD.418457   | metal      | metal     |
| Ba14Li5N6Na11.ICSD.418455   | metal      | metal     |
| Ba14Li6N6Na10.ICSD.418456   | metal      | metal     |
| Ba1Be13.ICSD.58633          | metal      | metal     |
| Ba1Be1F1O4P1.ICSD.200922    | insulator  | insulator |
| Ba1Be1F4.ICSD.414412        | insulator  | insulator |
| Ba1Be1La2O5.ICSD.65292      | insulator  | insulator |
| Ba1Be1O4Si1.ICSD.86792      | insulator  | insulator |
| Ba1Be2N2.ICSD.415304        | insulator  | insulator |
| Ba1Be2O7Si2.ICSD.100030     | insulator  | insulator |
| Ba1Be2O7Si2.ICSD.263133     | insulator  | insulator |
| Ba1Bi1Cl1O2.ICSD.79532      | insulator  | insulator |
| Ba1Bi1Cu1.ICSD.106303       | metal      | metal     |
| Ba1Bi1I1O2.ICSD.97511       | insulator  | insulator |
| Ba1Bi1Na1.ICSD.413810       | insulator  | metal     |
| Ba1Bi1O3.ICSD.151895        | insulator  | insulator |
| Ba1Bi1O3.ICSD.151896        | metal      | insulator |
| Ba1Bi1O3.ICSD.172756        | insulator  | insulator |
| Ba1Bi1Se3.ICSD.10505        | insulator  | insulator |
| Ba1Bi2La1S6.ICSD.85461      | insulator  | insulator |
| Ba1Bi2Mg2.ICSD.100049       | insulator  | insulator |
| Ba1Bi2Mo4O16.ICSD.416023    | insulator  | insulator |
| Ba1Bi2Pd2.ICSD.416299       | metal      | metal     |
| Ba1Bi3.ICSD.58634           | metal      | metal     |
| Ba1Br1Cl1.ICSD.35458        | insulator  | insulator |
| Ba1Br1F1.ICSD.155005        | insulator  | insulator |
| Ba1Br1H1.ICSD.25544         | insulator  | insulator |
| Ba1Br2H4O2.ICSD.33949       | insulator  | insulator |
| Ba1Br2O6.ICSD.40287         | insulator  | insulator |
| Ba1Br2O6.ICSD.66035         | insulator  | insulator |
| Ba1Br2.ICSD.262675          | insulator  | insulator |
| Ba1Br2.ICSD.79892           | insulator  | insulator |
| Ba1Br6Th1.ICSD.78770        | insulator  | insulator |
| Ba1C1Cl1H2N1O1S1.ICSD.82878 | insulator  | insulator |
| Ba1C1Cl1N1S1.ICSD.94400     | insulator  | insulator |
| Ba1C1Cu1F2O3.ICSD.79864     | insulator  | insulator |
| Ba1C1F2Mn1O3.ICSD.95740     | insulator  | insulator |
| Ba1C1F2O3Zn1.ICSD.95739     | insulator  | insulator |
| Ba1C1N2.ICSD.75041          | insulator  | insulator |
| Ba1C1O3.ICSD.158389         | insulator  | insulator |

Supplementary Table 131. Five-fold cross validated predictions for the metal/insulator classification (123/598).

| system                          | calculated | predicted |
|---------------------------------|------------|-----------|
| Ba1C1O3.ICSD.91897              | insulator  | insulator |
| Ba1C1Si1.ICSD.168411            | insulator  | insulator |
| Ba1C1Si1.ICSD.168413            | insulator  | insulator |
| Ba1C2Ca1O6.ICSD.100477          | insulator  | insulator |
| Ba1C2Ca1O6.ICSD.157982          | insulator  | insulator |
| Ba1C2Ca2F2O6.ICSD.245746        | insulator  | insulator |
| Ba1C2Ce1F1O6.ICSD.37195         | insulator  | insulator |
| Ba1C2Ce1F1O6.ICSD.74178         | insulator  | insulator |
| Ba1C2F2O6Pb2.ICSD.280899        | insulator  | insulator |
| Ba1C2H2O4.ICSD.151335           | insulator  | insulator |
| Ba1C2H2O5.ICSD.151115           | insulator  | insulator |
| Ba1C2H4O6.ICSD.162707           | insulator  | insulator |
| Ba1C2Mg1O6.ICSD.24435           | insulator  | insulator |
| Ba1C2Mg1O6.ICSD.89038           | insulator  | insulator |
| Ba1C2N2S2.ICSD.94428            | insulator  | insulator |
| Ba1C2O4.ICSD.261703             | insulator  | insulator |
| Ba1C2.ICSD.168408               | insulator  | insulator |
| Ba1C2.ICSD.186576               | insulator  | insulator |
| Ba1C2.ICSD.88098                | insulator  | insulator |
| Ba1C2.ICSD.88102                | insulator  | insulator |
| Ba1C4Ce2F1Na1O12.ICSD.77499     | insulator  | insulator |
| Ba1C4H6O7.ICSD.62387            | insulator  | insulator |
| Ba1C4H8N4O4Pt1.ICSD.851         | insulator  | insulator |
| Ba1C4O4.ICSD.412830             | insulator  | insulator |
| Ba1C8N8Pt2Rb2.ICSD.409861       | insulator  | insulator |
| Ba1Ca1Fe4O7.ICSD.161791         | insulator  | insulator |
| Ba1Ca1Fe4O8.ICSD.15174          | insulator  | insulator |
| Ba1Ca1Ga4O8.ICSD.280042         | insulator  | insulator |
| Ba1Ca1Ge1.ICSD.52681            | metal      | metal     |
| Ba1Ca1O4Si1.ICSD.67092          | insulator  | insulator |
| Ba1Ca1O7V2.ICSD.80810           | insulator  | insulator |
| Ba1Ca1Pb1.ICSD.615799           | insulator  | metal     |
| Ba1Ca1Si1.ICSD.52682            | metal      | metal     |
| Ba1Ca1Sn1.ICSD.58641            | insulator  | metal     |
| Ba1Ca2Mg1O8Si2.ICSD.422406      | insulator  | insulator |
| Ba1Ca2N12P6.ICSD.415714         | insulator  | insulator |
| Ba1Ca2O9Si3.ICSD.24426          | insulator  | insulator |
| Ba1Ca4Co2N4.ICSD.409921         | insulator  | insulator |
| Ba1Ca4Cu2N4.ICSD.86066          | insulator  | insulator |
| Ba1Cd0.333O3Ta0.667.ICSD.156335 | insulator  | insulator |
| Ba1Cd11.ICSD.615809             | metal      | metal     |
| Ba1Cd1F1Sb1.ICSD.421815         | insulator  | insulator |
| Ba1Cd1Ge1S4.ICSD.23343          | insulator  | insulator |
| Ba1Cd1Ge1.ICSD.106305           | metal      | metal     |
| Ba1Cd1K2Sb2.ICSD.422272         | metal      | insulator |
| Ba1Cd1O7P2.ICSD.72673           | insulator  | insulator |
| Ba1Cd1O7V2.ICSD.80811           | insulator  | insulator |
| Ba1Cd1S2.ICSD.66655             | insulator  | insulator |
| Ba1Cd1Sb2Yb1.ICSD.422280        | insulator  | metal     |
| Ba1Cd1.ICSD.58642               | metal      | metal     |

Supplementary Table 132. Five-fold cross validated predictions for the metal/insulator classification (124/598).

| system                    | calculated | predicted |
|---------------------------|------------|-----------|
| Ba1Cd2Ge2.ICSD_174263     | metal      | metal     |
| Ba1Cd2P2.ICSD_615814      | insulator  | insulator |
| Ba1Cd2Sb2.ICSD_32021      | metal      | insulator |
| Ba1Cd2.ICSD_260668        | metal      | metal     |
| Ba1Ce1Cu1S3.ICSD_659174   | insulator  | insulator |
| Ba1Ce1Cu1Se3.ICSD_659176  | insulator  | insulator |
| Ba1Ce1N2.ICSD_74791       | insulator  | insulator |
| Ba1Ce1O3.ICSD_29109       | insulator  | metal     |
| Ba1Ce1O3.ICSD_79627       | insulator  | insulator |
| Ba1Ce1O3.ICSD_88590       | insulator  | insulator |
| Ba1Ce1O3.ICSD_94347       | insulator  | insulator |
| Ba1Ce2Co1S5.ICSD_93708    | insulator  | insulator |
| Ba1Ce2Mn1S5.ICSD_91228    | insulator  | insulator |
| Ba1Ce2S5Zn1.ICSD_93712    | insulator  | insulator |
| Ba1Cl1Cu1O4P1.ICSD_79883  | insulator  | insulator |
| Ba1Cl1F1.ICSD_35491       | insulator  | insulator |
| Ba1Cl1H1O1.ICSD_74721     | insulator  | insulator |
| Ba1Cl1H1.ICSD_37201       | insulator  | insulator |
| Ba1Cl1N3.ICSD_418423      | metal      | insulator |
| Ba1Cl1O2Sb1.ICSD_200962   | insulator  | insulator |
| Ba1Cl1O3V1.ICSD_50786     | insulator  | insulator |
| Ba1Cl2Cu2O6Te2.ICSD_85786 | metal      | insulator |
| Ba1Cl2H2O1.ICSD_60886     | insulator  | insulator |
| Ba1Cl2H4O2.ICSD_2254      | insulator  | insulator |
| Ba1Cl2H6O11.ICSD_65020    | insulator  | insulator |
| Ba1Cl2Hg2O2.ICSD_77509    | insulator  | insulator |
| Ba1Cl2O6.ICSD_40285       | insulator  | insulator |
| Ba1Cl2.ICSD_183924        | insulator  | insulator |
| Ba1Cl2.ICSD_2190          | insulator  | insulator |
| Ba1Cl2.ICSD_2191          | insulator  | insulator |
| Ba1Cl2.ICSD_79891         | insulator  | insulator |
| Ba1Cl4Pd1.ICSD_411837     | insulator  | insulator |
| Ba1Cl4Zn1.ICSD_410193     | insulator  | insulator |
| Ba1Cl4Zn1.ICSD_411951     | insulator  | insulator |
| Ba1Cl5Gd1.ICSD_407832     | insulator  | insulator |
| Ba1Co1Dy2O5.ICSD_74974    | insulator  | insulator |
| Ba1Co1Dy2O5.ICSD_85060    | insulator  | insulator |
| Ba1Co1Er2O5.ICSD_65469    | insulator  | insulator |
| Ba1Co1Er2O5.ICSD_73168    | insulator  | insulator |
| Ba1Co1Eu2O5.ICSD_78173    | metal      | metal     |
| Ba1Co1F4.ICSD_261189      | insulator  | insulator |
| Ba1Co1F6Li1.ICSD_41178    | insulator  | insulator |
| Ba1Co1Gd2O5.ICSD_85059    | metal      | insulator |
| Ba1Co1Ho2O5.ICSD_65467    | insulator  | insulator |
| Ba1Co1K2N6O12.ICSD_23732  | metal      | metal     |
| Ba1Co1K2N6O12.ICSD_61070  | metal      | metal     |
| Ba1Co1La2S5.ICSD_95267    | insulator  | insulator |
| Ba1Co1Lu2O5.ICSD_74977    | insulator  | insulator |
| Ba1Co1Nd2O5.ICSD_202973   | insulator  | metal     |
| Ba1Co1Nd2S5.ICSD_96554    | insulator  | insulator |

Supplementary Table 133. Five-fold cross validated predictions for the metal/insulator classification (125/598).

| system                    | calculated | predicted |
|---------------------------|------------|-----------|
| Ba1Co1O2.ICSD_25813       | insulator  | metal     |
| Ba1Co1O3.ICSD_88670       | insulator  | metal     |
| Ba1Co1O4Si1.ICSD_73778    | insulator  | insulator |
| Ba1Co1O5Y2.ICSD_85061     | insulator  | insulator |
| Ba1Co1O7P2.ICSD_202853    | insulator  | insulator |
| Ba1Co1Pr2S5.ICSD_93709    | metal      | insulator |
| Ba1Co1S2.ICSD_246938      | metal      | metal     |
| Ba1Co1S2.ICSD_75515       | metal      | metal     |
| Ba1Co2Ge2.ICSD_420975     | metal      | metal     |
| Ba1Co2H2O9P2.ICSD_84830   | insulator  | insulator |
| Ba1Co2La1O6.ICSD_153495   | metal      | metal     |
| Ba1Co2Nd1O5.ICSD_96366    | metal      | metal     |
| Ba1Co2Nd1O6.ICSD_154107   | metal      | metal     |
| Ba1Co2O5Y1.ICSD_171432    | metal      | metal     |
| Ba1Co2O5Y1.ICSD_171435    | metal      | metal     |
| Ba1Co2O5Y1.ICSD_247220    | metal      | metal     |
| Ba1Co2O7Si2.ICSD_74160    | insulator  | insulator |
| Ba1Co3H2O10V2.ICSD_236321 | insulator  | insulator |
| Ba1Co4Dy1O7.ICSD_59795    | metal      | metal     |
| Ba1Co4Ho1O7.ICSD_420423   | insulator  | insulator |
| Ba1Co4Ho1O7.ICSD_420425   | metal      | metal     |
| Ba1Co4Ho1O7.ICSD_420426   | insulator  | insulator |
| Ba1Co4Ho1O7.ICSD_420427   | insulator  | insulator |
| Ba1Co4In1O7.ICSD_59794    | metal      | metal     |
| Ba1Co4Lu1O7.ICSD_59780    | metal      | metal     |
| Ba1Co4O7.2Yb1.ICSD_172418 | metal      | metal     |
| Ba1Co4O7Y1.ICSD_188853    | insulator  | metal     |
| Ba1Co4O7Y1.ICSD_95745     | insulator  | metal     |
| Ba1Co4O7Y1.ICSD_95747     | metal      | insulator |
| Ba1Cr10O15.ICSD_82100     | metal      | insulator |
| Ba1Cr1F5.ICSD_31705       | insulator  | insulator |
| Ba1Cr1F6.ICSD_10341       | metal      | insulator |
| Ba1Cr1O3.ICSD_35029       | metal      | insulator |
| Ba1Cr1O3.ICSD_35459       | metal      | insulator |
| Ba1Cr1O4.ICSD_188534      | insulator  | insulator |
| Ba1Cr1O4.ICSD_62560       | insulator  | insulator |
| Ba1Cr1S2.ICSD_165626      | insulator  | insulator |
| Ba1Cs2H6N2O12.ICSD_411040 | insulator  | insulator |
| Ba1Cu10P4.ICSD_83618      | metal      | metal     |
| Ba1Cu13.ICSD_154391       | metal      | metal     |
| Ba1Cu1Dy1Te3.ICSD_85601   | insulator  | insulator |
| Ba1Cu1Dy2O5.ICSD_93463    | insulator  | insulator |
| Ba1Cu1Er1S3.ICSD_78176    | insulator  | insulator |
| Ba1Cu1Er1Se3.ICSD_659168  | insulator  | insulator |
| Ba1Cu1Er2O5.ICSD_72165    | insulator  | insulator |
| Ba1Cu1F1S1.ICSD_183712    | insulator  | insulator |
| Ba1Cu1F1Se1.ICSD_75585    | insulator  | insulator |
| Ba1Cu1F1Te1.ICSD_245624   | insulator  | insulator |
| Ba1Cu1F4.ICSD_9930        | insulator  | insulator |
| Ba1Cu1F7Fe1.ICSD_60952    | insulator  | insulator |

Supplementary Table 134. Five-fold cross validated predictions for the metal/insulator classification (126/598).

| system                    | calculated | predicted |
|---------------------------|------------|-----------|
| Ba1Cu1Fe1Lu1O5_ICSD_66404 | metal      | metal     |
| Ba1Cu1Fe1O5Y1_ICSD_71355  | metal      | metal     |
| Ba1Cu1Gd1Se3_ICSD_280698  | insulator  | insulator |
| Ba1Cu1Ho2O5_ICSD_72163    | insulator  | insulator |
| Ba1Cu1K2N6O12_ICSD_1830   | metal      | metal     |
| Ba1Cu1La1S3_ICSD_659175   | insulator  | insulator |
| Ba1Cu1La1Se3_ICSD_659178  | insulator  | insulator |
| Ba1Cu1La1Te3_ICSD_88715   | insulator  | insulator |
| Ba1Cu1N1_ICSD_86064       | insulator  | insulator |
| Ba1Cu1Na2O8V2_ICSD_72364  | insulator  | insulator |
| Ba1Cu1Nd1S3_ICSD_659173   | insulator  | insulator |
| Ba1Cu1Nd2O5_ICSD_154576   | insulator  | insulator |
| Ba1Cu1O10Si4_ICSD_71864   | insulator  | insulator |
| Ba1Cu1O5Pr2_ICSD_85952    | insulator  | insulator |
| Ba1Cu1O5Y2_ICSD_72572     | insulator  | insulator |
| Ba1Cu1O6Se2_ICSD_202387   | insulator  | insulator |
| Ba1Cu1O6Se2_ICSD_202388   | insulator  | insulator |
| Ba1Cu1O7Te2_ICSD_404297   | metal      | insulator |
| Ba1Cu1O7V2_ICSD_40839     | insulator  | insulator |
| Ba1Cu1P1_ICSD_52684       | metal      | insulator |
| Ba1Cu1S3Sc1_ICSD_659165   | insulator  | insulator |
| Ba1Cu1S3Y1_ICSD_659166    | insulator  | insulator |
| Ba1Cu1Sb1_ICSD_57020      | metal      | metal     |
| Ba1Cu1Se3Y1_ICSD_659169   | insulator  | insulator |
| Ba1Cu1Sn2_ICSD_58647      | metal      | metal     |
| Ba1Cu1Te3Y1_ICSD_88716    | insulator  | insulator |
| Ba1Cu1_ICSD_58646         | metal      | metal     |
| Ba1Cu2Ga1_ICSD_615828     | metal      | metal     |
| Ba1Cu2Ge1S4_ICSD_10006    | insulator  | insulator |
| Ba1Cu2Ge1Se4_ICSD_411404  | insulator  | insulator |
| Ba1Cu2Ge2O7_ICSD_77133    | insulator  | insulator |
| Ba1Cu2O2_ICSD_9456        | insulator  | metal     |
| Ba1Cu2O7Si2_ICSD_51281    | insulator  | insulator |
| Ba1Cu2P4_ICSD_68802       | metal      | metal     |
| Ba1Cu2S2_ICSD_89573       | insulator  | insulator |
| Ba1Cu2S2_ICSD_89575       | insulator  | insulator |
| Ba1Cu2S4Sn1_ICSD_52685    | insulator  | insulator |
| Ba1Cu2Sb2_ICSD_236308     | metal      | metal     |
| Ba1Cu2Se2_ICSD_89574      | insulator  | insulator |
| Ba1Cu2Se2_ICSD_89576      | insulator  | insulator |
| Ba1Cu2Se4Sn1_ICSD_170857  | insulator  | insulator |
| Ba1Cu2Te2_ICSD_51444      | insulator  | insulator |
| Ba1Cu3H2O10V2_ICSD_67726  | insulator  | insulator |
| Ba1Cu3O4_ICSD_65881       | metal      | insulator |
| Ba1Cu3O4_ICSD_83079       | insulator  | metal     |
| Ba1Cu4O17P4V1_ICSD_406667 | insulator  | insulator |
| Ba1Cu4S3_ICSD_15138       | insulator  | insulator |
| Ba1Cu4S3_ICSD_15139       | insulator  | insulator |
| Ba1Cu5La4O12_ICSD_79398   | insulator  | metal     |
| Ba1Cu8P4_ICSD_66016       | metal      | metal     |

Supplementary Table 135. Five-fold cross validated predictions for the metal/insulator classification (127/598).

| system                     | calculated | predicted |
|----------------------------|------------|-----------|
| Ba1Cu9Ge4_ICSD_412885      | metal      | metal     |
| Ba1Cu9Si4_ICSD_412883      | metal      | metal     |
| Ba1Cu9Sn4_ICSD_424220      | metal      | metal     |
| Ba1Dy1Fe2O4.996_ICSD_99611 | insulator  | metal     |
| Ba1Dy1Fe4O7_ICSD_166241    | metal      | metal     |
| Ba1Dy2Ni1O5_ICSD_72627     | insulator  | insulator |
| Ba1Dy2O5Pd1_ICSD_404496    | insulator  | insulator |
| Ba1Dy2S4_ICSD_615841       | insulator  | insulator |
| Ba1Dy2Se4_ICSD_615842      | insulator  | insulator |
| Ba1Dy2Te4_ICSD_90334       | insulator  | insulator |
| Ba1Er1Mn2O5_ICSD_188495    | metal      | metal     |
| Ba1Er1Mn2O5_ICSD_188496    | metal      | metal     |
| Ba1Er2F8_ICSD_151699       | insulator  | insulator |
| Ba1Er2Ni1O5_ICSD_69323     | insulator  | insulator |
| Ba1Er2O10Si3_ICSD_167615   | insulator  | insulator |
| Ba1Er2S4_ICSD_188656       | insulator  | insulator |
| Ba1Er2Se4_ICSD_615844      | insulator  | insulator |
| Ba1Er2Te4_ICSD_90337       | insulator  | insulator |
| Ba1Eu1Fe2O5_ICSD_416716    | metal      | metal     |
| Ba1Eu2Ni1O5_ICSD_68086     | metal      | metal     |
| Ba1Eu2O5Pd1_ICSD_83232     | metal      | insulator |
| Ba1Eu2O5Pt1_ICSD_68085     | metal      | insulator |
| Ba1F10Te2_ICSD_81862       | insulator  | insulator |
| Ba1F10Zr2_ICSD_202530      | insulator  | insulator |
| Ba1F11Li1Zr2_ICSD_67512    | insulator  | insulator |
| Ba1F12Sb2_ICSD_39346       | insulator  | insulator |
| Ba1F1I1_ICSD_1128          | insulator  | insulator |
| Ba1F1O6P1U1_ICSD_249983    | insulator  | insulator |
| Ba1F2Fe2O7P2_ICSD_88824    | insulator  | insulator |
| Ba1F2_ICSD_181246          | insulator  | insulator |
| Ba1F2_ICSD_183923          | insulator  | insulator |
| Ba1F2_ICSD_41650           | insulator  | insulator |
| Ba1F3H1_ICSD_35409         | insulator  | insulator |
| Ba1F3Li1_ICSD_45310        | insulator  | insulator |
| Ba1F4Fe1_ICSD_82765        | insulator  | insulator |
| Ba1F4Mg1_ICSD_182596       | insulator  | insulator |
| Ba1F4Mg1_ICSD_182599       | insulator  | insulator |
| Ba1F4Mn1_ICSD_182603       | insulator  | insulator |
| Ba1F4Ni1_ICSD_261190       | insulator  | insulator |
| Ba1F4O1Ti1_ICSD_72740      | insulator  | insulator |
| Ba1F4Pd1_ICSD_108991       | insulator  | insulator |
| Ba1F4Sn1_ICSD_166207       | insulator  | insulator |
| Ba1F4Zn1_ICSD_402925       | insulator  | insulator |
| Ba1F5Ga1_ICSD_200316       | insulator  | insulator |
| Ba1F5Mn1_ICSD_38317        | insulator  | insulator |
| Ba1F5Sb1_ICSD_68455        | insulator  | insulator |
| Ba1F6Ge1_ICSD_26614        | insulator  | insulator |
| Ba1F6Ni1_ICSD_35396        | insulator  | insulator |
| Ba1F6Pb1_ICSD_25521        | insulator  | insulator |
| Ba1F6Rh1_ICSD_6038         | metal      | insulator |

Supplementary Table 136. Five-fold cross validated predictions for the metal/insulator classification (128/598).

| system                   | calculated | predicted |
|--------------------------|------------|-----------|
| Ba1F6Si1_ICSD_26613      | insulator  | insulator |
| Ba1F6Sn1_ICSD_33788      | insulator  | insulator |
| Ba1F6Tb1_ICSD_59306      | metal      | insulator |
| Ba1F6Te1_ICSD_88416      | insulator  | insulator |
| Ba1F6Ti1_ICSD_33789      | insulator  | insulator |
| Ba1F6Zr1_ICSD_1697       | insulator  | insulator |
| Ba1F6Zr1_ICSD_36122      | insulator  | insulator |
| Ba1F7Fe1Zn1_ICSD_36001   | insulator  | insulator |
| Ba1F7Ga1Mn1_ICSD_201525  | insulator  | insulator |
| Ba1F7Na1Zr1_ICSD_67515   | insulator  | insulator |
| Ba1F7Ta1_ICSD_417251     | insulator  | insulator |
| Ba1F8Tm2_ICSD_20103      | insulator  | insulator |
| Ba1Fe1H1O5P1_ICSD_174376 | insulator  | insulator |
| Ba1Fe1K1O3_ICSD_412877   | insulator  | insulator |
| Ba1Fe1La2S5_ICSD_51602   | insulator  | insulator |
| Ba1Fe1Nd2S5_ICSD_51605   | insulator  | insulator |
| Ba1Fe1O10Si4_ICSD_156832 | insulator  | insulator |
| Ba1Fe1O10Si4_ICSD_31205  | insulator  | insulator |
| Ba1Fe1O3_ICSD_262132     | metal      | metal     |
| Ba1Fe1Pr2S5_ICSD_51604   | insulator  | insulator |
| Ba1Fe2Gd1O5_ICSD_247569  | metal      | insulator |
| Ba1Fe2O4_ICSD_171001     | insulator  | insulator |
| Ba1Fe2O4_ICSD_2769       | insulator  | insulator |
| Ba1Fe2O5Y1_ICSD_281203   | insulator  | metal     |
| Ba1Fe2P2_ICSD_169745     | metal      | metal     |
| Ba1Fe2S3_ICSD_16307      | insulator  | metal     |
| Ba1Fe2S4_ICSD_23081      | insulator  | metal     |
| Ba1Fe2Se3_ICSD_290594    | insulator  | metal     |
| Ba1Fe2Se3_ICSD_290595    | insulator  | insulator |
| Ba1Fe2Se3_ICSD_424315    | insulator  | insulator |
| Ba1Fe4O7Y1_ICSD_262841   | metal      | metal     |
| Ba1Fe4O7Y1_ICSD_262842   | metal      | metal     |
| Ba1Fe4O8Sr1_ICSD_1943    | insulator  | insulator |
| Ba1Fe4O8Sr1_ICSD_2536    | metal      | insulator |
| Ba1Fe4O8Sr1_ICSD_37011   | insulator  | insulator |
| Ba1Fe4Sb12_ICSD_658735   | metal      | metal     |
| Ba1Ga1Ge1H1_ICSD_173573  | insulator  | insulator |
| Ba1Ga1Ge1_ICSD_615870    | metal      | metal     |
| Ba1Ga1H1Si1_ICSD_173572  | insulator  | insulator |
| Ba1Ga1H1Sn1_ICSD_173574  | insulator  | insulator |
| Ba1Ga1H4_ICSD_240693     | metal      | insulator |
| Ba1Ga1H5_ICSD_240693     | insulator  | insulator |
| Ba1Ga1La1O4_ICSD_180536  | insulator  | insulator |
| Ba1Ga1Nd1O4_ICSD_69641   | insulator  | insulator |
| Ba1Ga2P2_ICSD_380479     | insulator  | insulator |
| Ba1Ga2Pt2_ICSD_50160     | metal      | metal     |
| Ba1Ga2S4_ICSD_615871     | insulator  | insulator |
| Ba1Ga2Sb2_ICSD_280662    | insulator  | metal     |
| Ba1Ga2Se4_ICSD_24386     | insulator  | insulator |
| Ba1Ga2_ICSD_246238       | metal      | metal     |

Supplementary Table 137. Five-fold cross validated predictions for the metal/insulator classification (129/598).

| system                    | calculated | predicted |
|---------------------------|------------|-----------|
| Ba1Ga4S7_ICSD_162960      | insulator  | insulator |
| Ba1Ga4_ICSD_55449         | metal      | metal     |
| Ba1Gd2Ni1O5_ICSD_62758    | metal      | metal     |
| Ba1Gd2O5Pd1_ICSD_83233    | insulator  | insulator |
| Ba1Gd2O5Pt1_ICSD_202171   | insulator  | insulator |
| Ba1Gd2O7Sc2_ICSD_167604   | insulator  | insulator |
| Ba1Gd2S4_ICSD_615879      | insulator  | insulator |
| Ba1Gd2Te4_ICSD_90332      | metal      | insulator |
| Ba1Ge12Pt4_ICSD_174551    | metal      | metal     |
| Ba1Ge1Mn1_ICSD_615891     | metal      | metal     |
| Ba1Ge1Ni2_ICSD_421431     | metal      | metal     |
| Ba1Ge1O3_ICSD_23925       | insulator  | insulator |
| Ba1Ge1O8P2_ICSD_423040    | insulator  | insulator |
| Ba1Ge1Pt1_ICSD_106309     | metal      | metal     |
| Ba1Ge1Zn1_ICSD_106310     | metal      | metal     |
| Ba1Ge1_ICSD_659524        | metal      | metal     |
| Ba1Ge2Li1_ICSD_162583     | metal      | metal     |
| Ba1Ge2Li2Mg2_ICSD_409576  | metal      | metal     |
| Ba1Ge2Mg2_ICSD_25312      | metal      | metal     |
| Ba1Ge2Mn2_ICSD_404        | metal      | metal     |
| Ba1Ge2Mn2_ICSD_80502      | metal      | metal     |
| Ba1Ge2Mn2_ICSD_80503      | metal      | metal     |
| Ba1Ge2O5_ICSD_60061       | insulator  | insulator |
| Ba1Ge2P2_ICSD_26416       | insulator  | insulator |
| Ba1Ge2Rh2_ICSD_77146      | metal      | metal     |
| Ba1Ge2_ICSD_100129        | metal      | metal     |
| Ba1Ge2_ICSD_615881        | insulator  | metal     |
| Ba1Ge3Ir1_ICSD_174264     | metal      | metal     |
| Ba1Ge3Mg4_ICSD_165631     | metal      | metal     |
| Ba1Ge3O9Sn1_ICSD_10384    | insulator  | insulator |
| Ba1Ge3Pd1_ICSD_174261     | metal      | metal     |
| Ba1Ge3Pt1_ICSD_409867     | metal      | metal     |
| Ba1Ge3Rh1_ICSD_174265     | metal      | metal     |
| Ba1Ge3_ICSD_261651        | metal      | metal     |
| Ba1H1I1_ICSD_37203        | insulator  | insulator |
| Ba1H2N2O5_ICSD_200864     | insulator  | insulator |
| Ba1H2N2O5_ICSD_65641      | insulator  | insulator |
| Ba1H2Ni3O10V2_ICSD_424330 | insulator  | insulator |
| Ba1H2O14P4Si1_ICSD_41357  | insulator  | insulator |
| Ba1H2O14Se4V2_ICSD_79518  | insulator  | insulator |
| Ba1H2O4Sn2_ICSD_37115     | insulator  | insulator |
| Ba1H2O8S2_ICSD_62494      | insulator  | insulator |
| Ba1H2_ICSD_615909         | insulator  | insulator |
| Ba1H2_ICSD_62562          | metal      | metal     |
| Ba1H3Li1_ICSD_23977       | insulator  | insulator |
| Ba1H3Li1_ICSD_416463      | insulator  | insulator |
| Ba1H3Na1Pd1_ICSD_165609   | insulator  | insulator |
| Ba1H4I2O2_ICSD_407360     | insulator  | insulator |
| Ba1H4O3_ICSD_63017        | insulator  | insulator |
| Ba1H4O4P2_ICSD_59934      | insulator  | insulator |

Supplementary Table 138. Five-fold cross validated predictions for the metal/insulator classification (130/598).

| system                  | calculated | predicted |
|-------------------------|------------|-----------|
| Ba1H4O8P2_ICSD_1297     | insulator  | insulator |
| Ba1H6O8Si2_ICSD_26971   | insulator  | insulator |
| Ba1H7Re1_ICSD_247116    | insulator  | insulator |
| Ba1H8O5_ICSD_67109      | insulator  | insulator |
| Ba1H9Re1_ICSD_247104    | insulator  | insulator |
| Ba1H9Re1_ICSD_247107    | insulator  | insulator |
| Ba1H9Re1_ICSD_247109    | insulator  | insulator |
| Ba1H9Re1_ICSD_247110    | insulator  | insulator |
| Ba1H9Re1_ICSD_247111    | insulator  | insulator |
| Ba1H9Re1_ICSD_75460     | insulator  | insulator |
| Ba1Hf1N2_ICSD_184055    | insulator  | insulator |
| Ba1Hf1O8P2_ICSD_245690  | insulator  | insulator |
| Ba1Hf1O9Si3_ICSD_183835 | insulator  | insulator |
| Ba1Hg11_ICSD_107486     | metal      | metal     |
| Ba1Hg1O2_ICSD_68616     | insulator  | insulator |
| Ba1Hg1O2_ICSD_83411     | insulator  | insulator |
| Ba1Hg1O5Ru1_ICSD_81070  | insulator  | insulator |
| Ba1Hg1S2_ICSD_32648     | insulator  | insulator |
| Ba1Hg1S4Sn1_ICSD_10456  | insulator  | insulator |
| Ba1Hg1Sn1_ICSD_106311   | metal      | metal     |
| Ba1Hg1_ICSD_58654       | metal      | metal     |
| Ba1Hg2Ti2_ICSD_260391   | metal      | metal     |
| Ba1Hg2_ICSD_58655       | metal      | metal     |
| Ba1Hg6_ICSD_424857      | metal      | metal     |
| Ba1Ho2Ni1O5_ICSD_67930  | insulator  | insulator |
| Ba1Ho2O4_ICSD_154812    | insulator  | insulator |
| Ba1Ho2O5Pd1_ICSD_404497 | insulator  | insulator |
| Ba1Ho2S4_ICSD_615930    | insulator  | insulator |
| Ba1Ho2Te4_ICSD_90336    | insulator  | insulator |
| Ba1I2O6_ICSD_23276      | insulator  | insulator |
| Ba1I2_ICSD_15707        | insulator  | insulator |
| Ba1I2_ICSD_36210        | insulator  | insulator |
| Ba1I2_ICSD_79893        | insulator  | insulator |
| Ba1I6U1_ICSD_78772      | insulator  | insulator |
| Ba1In1_ICSD_414228      | metal      | metal     |
| Ba1In2Ir1_ICSD_414434   | metal      | metal     |
| Ba1In2La2O7_ICSD_95984  | insulator  | insulator |
| Ba1In2Nd2O7_ICSD_168283 | insulator  | insulator |
| Ba1In2O14P4_ICSD_180003 | insulator  | insulator |
| Ba1In2P2_ICSD_260564    | insulator  | insulator |
| Ba1In2Pt1_ICSD_411228   | metal      | metal     |
| Ba1In2Rh1_ICSD_411232   | metal      | metal     |
| Ba1In2Te4_ICSD_41168    | insulator  | insulator |
| Ba1In2_ICSD_58657       | metal      | metal     |
| Ba1In4Ir1_ICSD_173616   | metal      | metal     |
| Ba1In4_ICSD_414230      | metal      | metal     |
| Ba1Ir1O3_ICSD_173848    | metal      | metal     |
| Ba1Ir1O3_ICSD_173889    | metal      | metal     |
| Ba1Ir1O3_ICSD_260303    | metal      | metal     |
| Ba1Ir1P1_ICSD_73529     | metal      | metal     |

Supplementary Table 139. Five-fold cross validated predictions for the metal/insulator classification (131/598).

| system                         | calculated | predicted |
|--------------------------------|------------|-----------|
| Ba1Ir2P2_ICSD_95757            | metal      | metal     |
| Ba1Ir2Si2_ICSD_50159           | metal      | metal     |
| Ba1K1Nb1S4_ICSD_415335         | insulator  | insulator |
| Ba1K1O4P1_ICSD_202430          | insulator  | insulator |
| Ba1K1O4V1_ICSD_418461          | insulator  | insulator |
| Ba1K1P1S4_ICSD_414639          | insulator  | insulator |
| Ba1K1P1Se4_ICSD_414637         | insulator  | insulator |
| Ba1K4O9Si3_ICSD_246254         | insulator  | insulator |
| Ba1K4S8V2_ICSD_240378          | insulator  | insulator |
| Ba1La1Mn2O6_ICSD_150703        | metal      | metal     |
| Ba1La1Sb2Se6_ICSD_421269       | insulator  | insulator |
| Ba1La2Mn1S5_ICSD_90640         | insulator  | insulator |
| Ba1La2O14Te5_ICSD_417616       | insulator  | insulator |
| Ba1La2O5Pt1_ICSD_68794         | insulator  | insulator |
| Ba1La2O5Zn1_ICSD_172768        | insulator  | insulator |
| Ba1La2O7Sc2_ICSD_167599        | insulator  | insulator |
| Ba1La2S5Zn1_ICSD_93711         | insulator  | insulator |
| Ba1Li1P1_ICSD_416890           | insulator  | insulator |
| Ba1Li1P1_ICSD_56444            | insulator  | insulator |
| Ba1Li1Sb1_ICSD_280574          | insulator  | metal     |
| Ba1Li1Si1_ICSD_42890           | metal      | metal     |
| Ba1Li2Mg1O8P2_ICSD_236294      | insulator  | insulator |
| Ba1Li2Mg2Si2_ICSD_409575       | metal      | metal     |
| Ba1Li2O4Si1_ICSD_180289        | insulator  | insulator |
| Ba1Li2Si1_ICSD_15642           | metal      | metal     |
| Ba1Li4_ICSD_615944             | metal      | metal     |
| Ba1Lu2S4_ICSD_422891           | insulator  | insulator |
| Ba1Mg0.333Nb0.667O3_ICSD_95497 | insulator  | insulator |
| Ba1Mg0.333O3Ta0.667_ICSD_95495 | insulator  | insulator |
| Ba1Mg1Na2O8P2_ICSD_262716      | insulator  | insulator |
| Ba1Mg1O4Si1_ICSD_73776         | insulator  | insulator |
| Ba1Mg1O7Te2_ICSD_262408        | insulator  | insulator |
| Ba1Mg1Pb1_ICSD_615958          | metal      | metal     |
| Ba1Mg1Si1_ICSD_42459           | metal      | metal     |
| Ba1Mg1Sn1_ICSD_615965          | metal      | metal     |
| Ba1Mg2O8V2_ICSD_20429          | insulator  | insulator |
| Ba1Mg2P2_ICSD_30914            | insulator  | insulator |
| Ba1Mg2Sb2_ICSD_100047          | insulator  | insulator |
| Ba1Mg2Si2_ICSD_25311           | metal      | metal     |
| Ba1Mg2_ICSD_170241             | metal      | metal     |
| Ba1Mg4Si3_ICSD_165630          | metal      | metal     |
| Ba1Mn1Nd2S5_ICSD_93715         | metal      | insulator |
| Ba1Mn1O3_ICSD_10250            | insulator  | insulator |
| Ba1Mn1O3_ICSD_10331            | insulator  | insulator |
| Ba1Mn1O3_ICSD_23874            | insulator  | insulator |
| Ba1Mn1O3_ICSD_66822            | insulator  | insulator |
| Ba1Mn1O3_ICSD_89995            | insulator  | insulator |
| Ba1Mn1O4Rb1_ICSD_80640         | insulator  | insulator |
| Ba1Mn1O7P2_ICSD_78658          | insulator  | insulator |
| Ba1Mn1Pr2S5_ICSD_91229         | insulator  | insulator |

Supplementary Table 140. Five-fold cross validated predictions for the metal/insulator classification (132/598).

| system                     | calculated | predicted |
|----------------------------|------------|-----------|
| Ba1Mn1S2.ICSD_31453        | insulator  | insulator |
| Ba1Mn28.ICSD_615966        | metal      | metal     |
| Ba1Mn2Nd1O5.ICSD_158889    | metal      | metal     |
| Ba1Mn2Nd1O6.ICSD_150705    | metal      | metal     |
| Ba1Mn2Nd2O7.ICSD_154537    | metal      | metal     |
| Ba1Mn2O14Si4Sr2.ICSD_39593 | insulator  | insulator |
| Ba1Mn2O3.ICSD_10038        | insulator  | metal     |
| Ba1Mn2O5Pr1.ICSD_158885    | metal      | metal     |
| Ba1Mn2O5Y1.ICSD_86839      | metal      | metal     |
| Ba1Mn2O5Y1.ICSD_88950      | metal      | metal     |
| Ba1Mn2O6Pr1.ICSD_158886    | metal      | metal     |
| Ba1Mn2O6Tb1.ICSD_154009    | metal      | metal     |
| Ba1Mn2O6Tb1.ICSD_154010    | metal      | metal     |
| Ba1Mn2O6Y1.ICSD_154011     | metal      | metal     |
| Ba1Mn2O6Y1.ICSD_99700      | metal      | metal     |
| Ba1Mn2O6Y1.ICSD_99701      | metal      | metal     |
| Ba1Mn2O7Tb2.ICSD_99245     | metal      | insulator |
| Ba1Mn2O8.ICSD_23443        | insulator  | insulator |
| Ba1Mn2O8.ICSD_24128        | insulator  | insulator |
| Ba1Mn2P2.ICSD_10469        | metal      | metal     |
| Ba1Mn2Sb2.ICSD_32019       | metal      | metal     |
| Ba1Mn2Sb2.ICSD_419531      | metal      | metal     |
| Ba1Mn2Sn2.ICSD_405         | metal      | metal     |
| Ba1Mn3O38Ti18.ICSD_81584   | metal      | insulator |
| Ba1Mn3O6.ICSD_93226        | metal      | metal     |
| Ba1Mo1O3.ICSD_43799        | metal      | metal     |
| Ba1Mo1O4.ICSD_16166        | insulator  | insulator |
| Ba1Mo1O6Se1.ICSD_82255     | insulator  | insulator |
| Ba1Mo1O8P2.ICSD_79507      | insulator  | insulator |
| Ba1Mo2O11Se2.ICSD_82256    | insulator  | insulator |
| Ba1Mo2O12P2.ICSD_62833     | insulator  | insulator |
| Ba1Mo2O12P3.ICSD_68560     | metal      | insulator |
| Ba1Mo2O14P3.ICSD_153067    | insulator  | insulator |
| Ba1Mo2O14P4.ICSD_72339     | insulator  | insulator |
| Ba1Mo2O9Te1.ICSD_159460    | insulator  | insulator |
| Ba1Mo3Se3.ICSD_603615      | metal      | metal     |
| Ba1Mo3Te3.ICSD_603674      | metal      | metal     |
| Ba1Mo4O16P2.ICSD_75147     | insulator  | insulator |
| Ba1Mo6O10.ICSD_202739      | metal      | metal     |
| Ba1Mo6S8.ICSD_65775        | insulator  | metal     |
| Ba1Mo6S8.ICSD_85489        | metal      | metal     |
| Ba1N10Si7.ICSD_405772      | insulator  | insulator |
| Ba1N12P6Sr2.ICSD_415716    | insulator  | insulator |
| Ba1N1Ni1.ICSD_40166        | metal      | insulator |
| Ba1N2O2Si2.ICSD_419450     | insulator  | insulator |
| Ba1N2O4.ICSD_29510         | insulator  | insulator |
| Ba1N2O6.ICSD_56087         | insulator  | insulator |
| Ba1N2Si1.ICSD_170265       | insulator  | insulator |
| Ba1N2Zr1.ICSD_74904        | insulator  | insulator |
| Ba1N2.ICSD_423723          | metal      | insulator |

Supplementary Table 141. Five-fold cross validated predictions for the metal/insulator classification (133/598).

| system                        | calculated | predicted |
|-------------------------------|------------|-----------|
| Ba1N4P2.ICSD_414350           | insulator  | insulator |
| Ba1N6.ICSD_412253             | insulator  | insulator |
| Ba1N7Si4Y1.ICSD_98276         | insulator  | insulator |
| Ba1N7Si4Yb1.ICSD_160649       | insulator  | insulator |
| Ba1N8O1Si6.ICSD_415272        | insulator  | insulator |
| Ba1N8Si6.ICSD_417444          | insulator  | insulator |
| Ba1Na1O7Sc1Si2.ICSD_166998    | insulator  | insulator |
| Ba1Na1P1.ICSD_402227          | insulator  | insulator |
| Ba1Na2O6Si2.ICSD_10217        | insulator  | insulator |
| Ba1Na2.ICSD_106313            | metal      | metal     |
| Ba1Nb0.67O3Sr0.33.ICSD_186191 | insulator  | insulator |
| Ba1Nb1O3.ICSD_50275           | metal      | metal     |
| Ba1Nb1S3.ICSD_659538          | metal      | metal     |
| Ba1Nb2O11V2.ICSD_165097       | insulator  | insulator |
| Ba1Nb2O6.ICSD_39272           | insulator  | insulator |
| Ba1Nb2O6.ICSD_39320           | insulator  | insulator |
| Ba1Nb4O6.ICSD_42006           | metal      | metal     |
| Ba1Nb7O9.ICSD_66344           | metal      | metal     |
| Ba1Nb8O14.ICSD_79976          | insulator  | insulator |
| Ba1Nd2Ni1O5.ICSD_62627        | metal      | metal     |
| Ba1Nd2O5Pd1.ICSD_62609        | insulator  | insulator |
| Ba1Nd2O5Pt1.ICSD_47178        | insulator  | insulator |
| Ba1Nd2O5Zn1.ICSD_68808        | insulator  | insulator |
| Ba1Nd2S4.ICSD_615994          | insulator  | insulator |
| Ba1Nd2S5Zn1.ICSD_93714        | insulator  | insulator |
| Ba1Ni10P6.ICSD_67899          | metal      | metal     |
| Ba1Ni1O2.ICSD_15760           | insulator  | insulator |
| Ba1Ni1O3.ICSD_15761           | insulator  | insulator |
| Ba1Ni1O3.ICSD_175             | insulator  | insulator |
| Ba1Ni1O5Pr2.ICSD_75035        | metal      | metal     |
| Ba1Ni1O5Tb2.ICSD_66078        | insulator  | insulator |
| Ba1Ni1O5Y2.ICSD_71327         | insulator  | insulator |
| Ba1Ni1O5Yb2.ICSD_67832        | metal      | metal     |
| Ba1Ni1O5Yb2.ICSD_67834        | metal      | metal     |
| Ba1Ni1O5Yb2.ICSD_72632        | metal      | metal     |
| Ba1Ni1S2.ICSD_15289           | metal      | metal     |
| Ba1Ni1S2.ICSD_246945          | metal      | metal     |
| Ba1Ni1Sn3.ICSD_58662          | metal      | metal     |
| Ba1Ni2O8P2.ICSD_280167        | insulator  | insulator |
| Ba1Ni2O8V2.ICSD_201621        | insulator  | insulator |
| Ba1Ni2P2.ICSD_85408           | metal      | metal     |
| Ba1Ni2P4.ICSD_79104           | metal      | metal     |
| Ba1Ni2P4.ICSD_79105           | metal      | metal     |
| Ba1Ni2Si2.ICSD_14110          | metal      | metal     |
| Ba1Ni4O8.ICSD_20898           | insulator  | insulator |
| Ba1Ni9P5.ICSD_33918           | metal      | metal     |
| Ba1O11V6.ICSD_260347          | metal      | metal     |
| Ba1O11V6.ICSD_260348          | metal      | metal     |
| Ba1O11V6.ICSD_416456          | metal      | metal     |
| Ba1O13Ti6.ICSD_2922           | insulator  | insulator |

Supplementary Table 142. Five-fold cross validated predictions for the metal/insulator classification (134/598).

| system                 | calculated | predicted |
|------------------------|------------|-----------|
| Ba1O14P4Ti2.ICSD_69103 | insulator  | insulator |
| Ba1O14P4V2.ICSD_66538  | insulator  | insulator |
| Ba1O14Sr4U3.ICSD_50812 | insulator  | insulator |
| Ba1O18V13.ICSD_97948   | metal      | metal     |
| Ba1O1S1Zn1.ICSD_171239 | insulator  | insulator |
| Ba1O1.ICSD_15301       | insulator  | insulator |
| Ba1O1.ICSD_173921      | insulator  | insulator |
| Ba1O1.ICSD_58663       | insulator  | insulator |
| Ba1O2.8V1.ICSD_78164   | insulator  | insulator |
| Ba1O2Zn1.ICSD_25812    | insulator  | insulator |
| Ba1O2.ICSD_180398      | insulator  | insulator |
| Ba1O2.ICSD_80750       | insulator  | insulator |
| Ba1O3Pa1.ICSD_61315    | metal      | metal     |
| Ba1O3Pb1.ICSD_245603   | metal      | insulator |
| Ba1O3Pb1.ICSD_51659    | metal      | metal     |
| Ba1O3Pb1.ICSD_72269    | metal      | metal     |
| Ba1O3Pb1.ICSD_94312    | insulator  | metal     |
| Ba1O3Pb1.ICSD_94313    | insulator  | insulator |
| Ba1O3Pr1.ICSD_163752   | insulator  | insulator |
| Ba1O3Pr1.ICSD_163753   | insulator  | insulator |
| Ba1O3Pr1.ICSD_52336    | metal      | insulator |
| Ba1O3Pu1.ICSD_43768    | metal      | metal     |
| Ba1O3Rh1.ICSD_15520    | metal      | insulator |
| Ba1O3Ru1.ICSD_10253    | metal      | metal     |
| Ba1O3Ru1.ICSD_160287   | metal      | metal     |
| Ba1O3Ru1.ICSD_246019   | metal      | metal     |
| Ba1O3Ru1.ICSD_84652    | metal      | metal     |
| Ba1O3Se1.ICSD_54156    | insulator  | insulator |
| Ba1O3Si1.ICSD_156705   | insulator  | insulator |
| Ba1O3Si1.ICSD_156706   | insulator  | insulator |
| Ba1O3Si1.ICSD_6245     | insulator  | insulator |
| Ba1O3Sn1.ICSD_184338   | metal      | insulator |
| Ba1O3Tb1.ICSD_2752     | metal      | insulator |
| Ba1O3Tb1.ICSD_86737    | metal      | insulator |
| Ba1O3Tb1.ICSD_99477    | metal      | insulator |
| Ba1O3Tb1.ICSD_99478    | metal      | metal     |
| Ba1O3Tc1.ICSD_109077   | insulator  | insulator |
| Ba1O3Te1.ICSD_10107    | insulator  | insulator |
| Ba1O3Te1.ICSD_4320     | insulator  | insulator |
| Ba1O3Th1.ICSD_29110    | insulator  | insulator |
| Ba1O3Ti1.ICSD_100802   | insulator  | insulator |
| Ba1O3Ti1.ICSD_109327   | metal      | insulator |
| Ba1O3Ti1.ICSD_154346   | insulator  | insulator |
| Ba1O3Ti1.ICSD_186461   | insulator  | insulator |
| Ba1O3Ti1.ICSD_31155    | insulator  | insulator |
| Ba1O3Ti1.ICSD_34619    | insulator  | insulator |
| Ba1O3Ti1.ICSD_55221    | insulator  | insulator |
| Ba1O3Ti1.ICSD_73628    | insulator  | insulator |
| Ba1O3Ti1.ICSD_73640    | insulator  | insulator |
| Ba1O3V1.ICSD_78168     | metal      | insulator |

Supplementary Table 143. Five-fold cross validated predictions for the metal/insulator classification (135/598).

| system                  | calculated | predicted |
|-------------------------|------------|-----------|
| Ba1O3Zr1.ICSD_90049     | insulator  | insulator |
| Ba1O4P1Rb1.ICSD_72001   | insulator  | insulator |
| Ba1O4S1.ICSD_186427     | insulator  | insulator |
| Ba1O4S1.ICSD_23743      | insulator  | insulator |
| Ba1O4S1.ICSD_33732      | insulator  | insulator |
| Ba1O4Se1.ICSD_409810    | insulator  | insulator |
| Ba1O4Si1Zn1.ICSD_73777  | insulator  | insulator |
| Ba1O4Tb2.ICSD_78661     | insulator  | insulator |
| Ba1O4U1.ICSD_36239      | insulator  | insulator |
| Ba1O4W1.ICSD_155512     | insulator  | insulator |
| Ba1O4W1.ICSD_155516     | insulator  | insulator |
| Ba1O4Y2.ICSD_89640      | insulator  | insulator |
| Ba1O5Pd1Pr2.ICSD_202172 | insulator  | insulator |
| Ba1O5Pd1Tb2.ICSD_202173 | insulator  | insulator |
| Ba1O5Pd1Y2.ICSD_202819  | insulator  | insulator |
| Ba1O5Se2.ICSD_54157     | insulator  | insulator |
| Ba1O5Si2.ICSD_10162     | insulator  | insulator |
| Ba1O5Tb2Zn1.ICSD_69721  | insulator  | insulator |
| Ba1O5Ti2.ICSD_157775    | insulator  | insulator |
| Ba1O5Ti2.ICSD_162369    | insulator  | insulator |
| Ba1O5Ti2.ICSD_2356      | insulator  | insulator |
| Ba1O5Ti2.ICSD_281548    | insulator  | insulator |
| Ba1O6P1V1.ICSD_66699    | insulator  | insulator |
| Ba1O6P2.ICSD_15714      | insulator  | insulator |
| Ba1O6Sb2.ICSD_74541     | insulator  | insulator |
| Ba1O6Te2.ICSD_8017      | insulator  | insulator |
| Ba1O6Ti1U1.ICSD_156646  | insulator  | insulator |
| Ba1O6V2.ICSD_80938      | insulator  | insulator |
| Ba1O7P2Zn1.ICSD_39396   | insulator  | insulator |
| Ba1O7Si2V1.ICSD_78029   | insulator  | insulator |
| Ba1O7Te2Zn1.ICSD_262409 | insulator  | insulator |
| Ba1O7U2.ICSD_22206      | insulator  | insulator |
| Ba1O8P2Sn1.ICSD_420129  | insulator  | insulator |
| Ba1O8P2Th1.ICSD_421965  | insulator  | insulator |
| Ba1O8P2Zn2.ICSD_300159  | insulator  | insulator |
| Ba1O8P2Zr1.ICSD_153124  | insulator  | insulator |
| Ba1O8P2Zr1.ICSD_173842  | insulator  | insulator |
| Ba1O8Si2U1.ICSD_79817   | insulator  | insulator |
| Ba1O8V3.ICSD_80299      | insulator  | insulator |
| Ba1O8V3.ICSD_82063      | insulator  | insulator |
| Ba1O9Si3Sn1.ICSD_10385  | insulator  | insulator |
| Ba1O9Si3Ti1.ICSD_290229 | insulator  | insulator |
| Ba1O9Si4.ICSD_80067     | insulator  | insulator |
| Ba1O9Te1W2.ICSD_281502  | insulator  | insulator |
| Ba1O9Ti4.ICSD_49575     | insulator  | insulator |
| Ba1O9V4.ICSD_173002     | insulator  | insulator |
| Ba1Os2P2.ICSD_602106    | metal      | metal     |
| Ba1Os4Sb12.ICSD_658736  | metal      | metal     |
| Ba1P10.ICSD_35295       | insulator  | insulator |
| Ba1P1Pt1.ICSD_59191     | metal      | metal     |

Supplementary Table 144. Five-fold cross validated predictions for the metal/insulator classification (136/598).

| system                  | calculated | predicted |
|-------------------------|------------|-----------|
| Ba1P2Pd2.ICSD_36375     | metal      | metal     |
| Ba1P2Rh2.ICSD_50188     | metal      | metal     |
| Ba1P2Ru2.ICSD_616013    | metal      | metal     |
| Ba1P2Zn2.ICSD_12145     | metal      | insulator |
| Ba1P3Pt2.ICSD_62520     | insulator  | insulator |
| Ba1P3.ICSD_23618        | insulator  | metal     |
| Ba1P4Pd2.ICSD_75020     | metal      | metal     |
| Ba1P4Te2.ICSD_412643    | insulator  | insulator |
| Ba1P8.ICSD_96544        | insulator  | insulator |
| Ba1Pb1Zn1.ICSD_106315   | metal      | metal     |
| Ba1Pb1.ICSD_616019      | metal      | metal     |
| Ba1Pb3.ICSD_419973      | metal      | metal     |
| Ba1Pd1S2.ICSD_63588     | insulator  | insulator |
| Ba1Pd1Sb2.ICSD_405111   | metal      | metal     |
| Ba1Pd1Si1.ICSD_616034   | metal      | metal     |
| Ba1Pd1Si3.ICSD_174266   | metal      | metal     |
| Ba1Pd1Sn3.ICSD_58673    | metal      | metal     |
| Ba1Pd1.ICSD_616028      | metal      | metal     |
| Ba1Pd2S4.ICSD_79930     | insulator  | insulator |
| Ba1Pd2Sb2.ICSD_604350   | metal      | metal     |
| Ba1Pd2Sb2.ICSD_61197    | metal      | metal     |
| Ba1Pd2.ICSD_616027      | metal      | metal     |
| Ba1Pd5.ICSD_58672       | metal      | metal     |
| Ba1Pr2S5Zn1.ICSD_93713  | insulator  | insulator |
| Ba1Pt1Sb1.ICSD_59186    | metal      | metal     |
| Ba1Pt1Si1.ICSD_604438   | metal      | metal     |
| Ba1Pt1Si3.ICSD_174267   | metal      | metal     |
| Ba1Pt1Sn3.ICSD_58677    | metal      | metal     |
| Ba1Pt1.ICSD_55492       | metal      | metal     |
| Ba1Pt2S3.ICSD_201146    | insulator  | insulator |
| Ba1Pt2S3.ICSD_55077     | insulator  | insulator |
| Ba1Pt2.ICSD_58675       | metal      | metal     |
| Ba1Pt5.ICSD_58676       | metal      | metal     |
| Ba1Rb1S4Ta1.ICSD_421845 | insulator  | insulator |
| Ba1Rh2Si2.ICSD_50158    | metal      | metal     |
| Ba1Rh2.ICSD_108149      | metal      | metal     |
| Ba1Ru2Sb2.ICSD_188980   | metal      | metal     |
| Ba1Ru4Sb12.ICSD_42963   | metal      | metal     |
| Ba1S1.ICSD_52690        | insulator  | insulator |
| Ba1S2Sn1.ICSD_2587      | insulator  | insulator |
| Ba1S2.ICSD_2004         | insulator  | insulator |
| Ba1S3Sn2.ICSD_26333     | insulator  | insulator |
| Ba1S3Ta1.ICSD_659541    | metal      | metal     |
| Ba1S3Te1.ICSD_8         | insulator  | insulator |
| Ba1S3Ti1.ICSD_616083    | metal      | metal     |
| Ba1S3U1.ICSD_23289      | insulator  | insulator |
| Ba1S3V1.ICSD_154181     | metal      | metal     |
| Ba1S3V1.ICSD_154183     | insulator  | insulator |
| Ba1S3V1.ICSD_154184     | insulator  | insulator |
| Ba1S3V1.ICSD_15537      | metal      | metal     |

Supplementary Table 145. Five-fold cross validated predictions for the metal/insulator classification (137/598).

| system                | calculated | predicted |
|-----------------------|------------|-----------|
| Ba1S3V1.ICSD_616099   | insulator  | metal     |
| Ba1S3V1.ICSD_63230    | metal      | metal     |
| Ba1S3Zr1.ICSD_165977  | insulator  | insulator |
| Ba1S3.ICSD_23637      | insulator  | insulator |
| Ba1S3.ICSD_26765      | insulator  | insulator |
| Ba1S4Sb2.ICSD_38372   | insulator  | insulator |
| Ba1S4Tb2.ICSD_616078  | insulator  | insulator |
| Ba1S4Y2.ICSD_616101   | insulator  | insulator |
| Ba1S4Yb2.ICSD_616102  | metal      | metal     |
| Ba1Sb1Te3.ICSD_10506  | insulator  | insulator |
| Ba1Sb2Zn2.ICSD_32020  | metal      | metal     |
| Ba1Sb2.ICSD_409517    | metal      | metal     |
| Ba1Sb3.ICSD_49000     | metal      | metal     |
| Ba1Sc2Te4.ICSD_416326 | insulator  | insulator |
| Ba1Se1.ICSD_43655     | insulator  | insulator |
| Ba1Se1.ICSD_52695     | insulator  | insulator |
| Ba1Se2.ICSD_16358     | insulator  | insulator |
| Ba1Se3Ta1.ICSD_616129 | metal      | metal     |
| Ba1Se3Ti1.ICSD_616131 | metal      | metal     |
| Ba1Se3V1.ICSD_10486   | metal      | metal     |
| Ba1Se3Zr1.ICSD_616136 | metal      | metal     |
| Ba1Se3.ICSD_16359     | insulator  | insulator |
| Ba1Se4Sm2.ICSD_616127 | metal      | insulator |
| Ba1Se4Y2.ICSD_422980  | insulator  | insulator |
| Ba1Se4Yb2.ICSD_616135 | insulator  | metal     |
| Ba1Si1Zn1.ICSD_106316 | metal      | metal     |
| Ba1Si1.ICSD_659548    | metal      | metal     |
| Ba1Si2Zn2.ICSD_174269 | metal      | metal     |
| Ba1Si2.ICSD_1237      | metal      | metal     |
| Ba1Si2.ICSD_168407    | insulator  | metal     |
| Ba1Si2.ICSD_168409    | metal      | metal     |
| Ba1Si2.ICSD_20244     | metal      | metal     |
| Ba1Si2.ICSD_602228    | metal      | metal     |
| Ba1Si6.ICSD_245295    | metal      | metal     |
| Ba1Sn1Zn1.ICSD_106317 | metal      | metal     |
| Ba1Sn1.ICSD_58678     | metal      | metal     |
| Ba1Sn2.ICSD_409958    | metal      | metal     |
| Ba1Sn3.ICSD_419206    | metal      | metal     |
| Ba1Sn5.ICSD_107305    | metal      | metal     |
| Ba1Tb2Te4.ICSD_90333  | insulator  | insulator |
| Ba1Te1.ICSD_43656     | insulator  | insulator |
| Ba1Te1.ICSD_616164    | insulator  | insulator |
| Ba1Te2.ICSD_80280     | insulator  | insulator |
| Ba1Te3.ICSD_36366     | insulator  | insulator |
| Ba1Te4Y2.ICSD_90335   | insulator  | insulator |
| Ba1Ti2.ICSD_58681     | metal      | metal     |
| Ba1Ti4.ICSD_261206    | metal      | metal     |
| Ba1Zn13.ICSD_616177   | metal      | metal     |
| Ba1Zn1.ICSD_58682     | metal      | metal     |
| Ba1Zn2.ICSD_58683     | metal      | metal     |

Supplementary Table 146. Five-fold cross validated predictions for the metal/insulator classification (138/598).

| system                      | calculated | predicted |
|-----------------------------|------------|-----------|
| Ba1Zn5.ICSD_418610          | metal      | metal     |
| Ba1.ICSD_108091             | metal      | metal     |
| Ba1.ICSD_109029             | metal      | metal     |
| Ba1.ICSD_109030             | metal      | metal     |
| Ba1.ICSD_52679              | metal      | metal     |
| Ba1.ICSD_52680              | metal      | metal     |
| Ba1.ICSD_89237              | metal      | metal     |
| Ba21Ge2O5.ICSD_491557       | metal      | metal     |
| Ba21O5Si2.ICSD_491556       | metal      | metal     |
| Ba24Si100.ICSD_90703        | metal      | insulator |
| Ba2Bi1Dy1O6.ICSD_68612      | insulator  | insulator |
| Ba2Bi1Fe1S5.ICSD_261419     | insulator  | insulator |
| Ba2Bi1Ir1O6.ICSD_174289     | metal      | insulator |
| Ba2Bi1Ir1O6.ICSD_174290     | insulator  | metal     |
| Ba2Bi1O6Sb1.ICSD_172761     | insulator  | insulator |
| Ba2Bi1O6Sb1.ICSD_172762     | insulator  | insulator |
| Ba2Bi1O6Ta1.ICSD_153120     | insulator  | insulator |
| Ba2Bi1O6Ta1.ICSD_154150     | insulator  | insulator |
| Ba2Bi1O6Y1.ICSD_65555       | insulator  | insulator |
| Ba2Bi1O6Yb1.ICSD_80902      | insulator  | metal     |
| Ba2Bi1.ICSD_2141            | metal      | metal     |
| Ba2Bi2Mn2O1.ICSD_16361      | metal      | metal     |
| Ba2Bi2O6.ICSD_28164         | insulator  | insulator |
| Ba2Bi2Zn1.ICSD_421424       | insulator  | metal     |
| Ba2Bi3.ICSD_170218          | metal      | metal     |
| Ba2Bi4Cd3.ICSD_58636        | metal      | metal     |
| Ba2Br1Cu1O2.ICSD_67395      | insulator  | insulator |
| Ba2Br1H3.ICSD_415127        | insulator  | insulator |
| Ba2Br1In1O3.ICSD_81878      | insulator  | insulator |
| Ba2Br1N1.ICSD_262056        | insulator  | insulator |
| Ba2Br2Cu3O4.ICSD_36128      | metal      | metal     |
| Ba2Br2F10Pb4.ICSD_411087    | insulator  | insulator |
| Ba2Br2O1.ICSD_423479        | insulator  | insulator |
| Ba2Br5Cs1.ICSD_402191       | insulator  | insulator |
| Ba2C2Co1F2O6.ICSD_95721     | insulator  | insulator |
| Ba2C2F3O6Y1.ICSD_72733      | insulator  | insulator |
| Ba2C3Ce1F1O9.ICSD_72446     | insulator  | insulator |
| Ba2C3Cs2O9.ICSD_73170       | insulator  | insulator |
| Ba2C3F1La1O9.ICSD_250059    | insulator  | insulator |
| Ba2C4H12N2O10S2.ICSD_59807  | insulator  | insulator |
| Ba2Ca1Cr2Cu1F14.ICSD_419545 | insulator  | insulator |
| Ba2Ca1Cu1F14Fe2.ICSD_202761 | insulator  | insulator |
| Ba2Ca1Cu2Hg1O6.ICSD_75728   | metal      | metal     |
| Ba2Ca1Cu2O7Tl1.ICSD_67128   | metal      | metal     |
| Ba2Ca1Ir1O6.ICSD_74029      | insulator  | metal     |
| Ba2Ca1Mo1O6.ICSD_45317      | insulator  | insulator |
| Ba2Ca1N4W1.ICSD_409472      | insulator  | insulator |
| Ba2Ca1O6Os1.ICSD_171989     | metal      | metal     |
| Ba2Ca1O6Pd3.ICSD_73082      | insulator  | insulator |
| Ba2Ca1O6Re1.ICSD_109258     | metal      | metal     |

Supplementary Table 147. Five-fold cross validated predictions for the metal/insulator classification (139/598).

| system                     | calculated | predicted |
|----------------------------|------------|-----------|
| Ba2Ca1O6Re1.ICSD_171987    | metal      | metal     |
| Ba2Ca1O6Te1.ICSD_246112    | insulator  | insulator |
| Ba2Ca1O6W1.ICSD_246111     | insulator  | insulator |
| Ba2Ca1O6W1.ICSD_246117     | insulator  | insulator |
| Ba2Ca2Cu3Hg1O8.ICSD_75735  | metal      | metal     |
| Ba2Ca2Sn6.ICSD_249515      | metal      | metal     |
| Ba2Cd1O6Re1.ICSD_109257    | metal      | metal     |
| Ba2Cd1O6U1.ICSD_167503     | insulator  | insulator |
| Ba2Cd1S3.ICSD_66654        | insulator  | insulator |
| Ba2Cd1Se3.ICSD_66653       | insulator  | insulator |
| Ba2Cd1Te3.ICSD_88849       | insulator  | insulator |
| Ba2Cd1.ICSD_30083          | metal      | metal     |
| Ba2Cd2K1Sb3.ICSD_420620    | insulator  | metal     |
| Ba2Cd2Sb3.ICSD_420834      | metal      | metal     |
| Ba2Ce1Cl7.ICSD_000         | insulator  | insulator |
| Ba2Ce1O6Pt1.ICSD_66408     | insulator  | insulator |
| Ba2Cl1Co2F7.ICSD_79479     | insulator  | insulator |
| Ba2Cl1Co4O7.ICSD_245991    | insulator  | insulator |
| Ba2Cl1Cu1O2.ICSD_1038      | insulator  | insulator |
| Ba2Cl1F3.ICSD_183926       | insulator  | insulator |
| Ba2Cl1F7Mn1Ni1.ICSD_79480  | insulator  | insulator |
| Ba2Cl1F7Ni2.ICSD_84782     | insulator  | insulator |
| Ba2Cl1F7Zn2.ICSD_79478     | insulator  | insulator |
| Ba2Cl1H3.ICSD_416893       | insulator  | insulator |
| Ba2Cl1In1O3.ICSD_81877     | insulator  | insulator |
| Ba2Cl1Mn1O7Si2.ICSD_281430 | insulator  | insulator |
| Ba2Cl1N1.ICSD_262135       | insulator  | insulator |
| Ba2Cl1P1.ICSD_28134        | insulator  | insulator |
| Ba2Cl1P7.ICSD_24398        | insulator  | insulator |
| Ba2Cl2Co1O6Se2.ICSD_280965 | insulator  | insulator |
| Ba2Cl2Cu3O4.ICSD_163501    | metal      | metal     |
| Ba2Cl7Er1.ICSD_82494       | insulator  | insulator |
| Ba2Cl7Gd1.ICSD_82495       | insulator  | insulator |
| Ba2Cl7La1.ICSD_000         | insulator  | insulator |
| Ba2Cl7Sc1.ICSD_408056      | insulator  | insulator |
| Ba2Cl7Sc1.ICSD_56832       | insulator  | insulator |
| Ba2Cl7Y1.ICSD_000          | insulator  | insulator |
| Ba2Cl7Yb1.ICSD_000         | metal      | insulator |
| Ba2Co1Cu2O2S2.ICSD_261352  | metal      | metal     |
| Ba2Co1F6.ICSD_21057        | insulator  | insulator |
| Ba2Co1Ge2O7.ICSD_290483    | insulator  | insulator |
| Ba2Co1Mo1O6.ICSD_184910    | metal      | metal     |
| Ba2Co1O4.ICSD_16234        | insulator  | insulator |
| Ba2Co1O4.ICSD_92321        | insulator  | insulator |
| Ba2Co1O6Re1.ICSD_109254    | insulator  | metal     |
| Ba2Co1O6U1.ICSD_245141     | metal      | insulator |
| Ba2Co1O6W1.ICSD_27425      | metal      | insulator |
| Ba2Co1O7Si2.ICSD_281293    | insulator  | insulator |
| Ba2Co1O7Si2.ICSD_81472     | insulator  | insulator |
| Ba2Co4O11Tb2.ICSD_94046    | metal      | metal     |

Supplementary Table 148. Five-fold cross validated predictions for the metal/insulator classification (140/598).

| system                     | calculated | predicted |
|----------------------------|------------|-----------|
| Ba2Co9O14.ICSD_161771      | metal      | metal     |
| Ba2Cr1Mo1O6.ICSD_184907    | metal      | metal     |
| Ba2Cr1O4.ICSD_73892        | insulator  | insulator |
| Ba2Cr1O6Ta1.ICSD_74410     | insulator  | insulator |
| Ba2Cr7O14.ICSD_2766        | insulator  | metal     |
| Ba2Cs1Nb3O10.ICSD_93676    | insulator  | insulator |
| Ba2Cu1F6.ICSD_100028       | insulator  | insulator |
| Ba2Cu1F6.ICSD_21055        | metal      | insulator |
| Ba2Cu1Ge2O7.ICSD_77132     | insulator  | insulator |
| Ba2Cu1Hg1O4.ICSD_75723     | metal      | metal     |
| Ba2Cu1I1O2.ICSD_67394      | insulator  | insulator |
| Ba2Cu1O3.ICSD_68217        | metal      | metal     |
| Ba2Cu1O5Ti1.ICSD_66583     | metal      | metal     |
| Ba2Cu1O6Te1.ICSD_88703     | insulator  | insulator |
| Ba2Cu1O6U1.ICSD_157853     | insulator  | insulator |
| Ba2Cu1O6U1.ICSD_169534     | insulator  | insulator |
| Ba2Cu1O6W1.ICSD_33569      | insulator  | insulator |
| Ba2Cu1O6W1.ICSD_72813      | insulator  | insulator |
| Ba2Cu1O7Si2.ICSD_20905     | insulator  | insulator |
| Ba2Cu1O7Si2.ICSD_97762     | insulator  | insulator |
| Ba2Cu1O8P2.ICSD_81457      | insulator  | insulator |
| Ba2Cu2Eu2O11Ti2.ICSD_66812 | metal      | metal     |
| Ba2Cu2La1O8Ta1.ICSD_64639  | metal      | metal     |
| Ba2Cu2Nb1Nd1O8.ICSD_44255  | metal      | metal     |
| Ba2Cu2Nd2O11Ti2.ICSD_75342 | metal      | metal     |
| Ba2Cu2O11Tb2Ti2.ICSD_79534 | metal      | metal     |
| Ba2Cu2O12Si4.ICSD_71535    | insulator  | insulator |
| Ba2Cu2O7Ti1Y1.ICSD_74163   | metal      | metal     |
| Ba2Cu2S5U1.ICSD_418464     | insulator  | insulator |
| Ba2Cu3Dy1O7.ICSD_81173     | metal      | metal     |
| Ba2Cu3Er1O7.02.ICSD_63405  | metal      | metal     |
| Ba2Cu3Eu1O7.ICSD_81171     | metal      | metal     |
| Ba2Cu3Gd1O7.ICSD_56514     | metal      | metal     |
| Ba2Cu3Ho1O6.ICSD_68047     | metal      | metal     |
| Ba2Cu3Ho1O7.ICSD_68044     | metal      | metal     |
| Ba2Cu3Ho1O7.ICSD_81174     | metal      | metal     |
| Ba2Cu3La1O7.ICSD_81167     | metal      | metal     |
| Ba2Cu3La1O8.ICSD_85291     | metal      | metal     |
| Ba2Cu3Li1O6.ICSD_401239    | insulator  | insulator |
| Ba2Cu3Lu1O6.ICSD_98113     | metal      | metal     |
| Ba2Cu3Na1O6.ICSD_72328     | insulator  | insulator |
| Ba2Cu3Nd1O6.ICSD_83074     | metal      | metal     |
| Ba2Cu3Nd1O7.ICSD_86960     | metal      | metal     |
| Ba2Cu3O6Y1.ICSD_67016      | metal      | metal     |
| Ba2Cu3O7Pr1.ICSD_41452     | metal      | metal     |
| Ba2Cu3O7Y1.ICSD_86958      | metal      | metal     |
| Ba2Cu3O8Pr1.ICSD_86043     | metal      | metal     |
| Ba2Cu3P4.ICSD_69494        | metal      | insulator |
| Ba2Cu3S6V1.ICSD_83969      | insulator  | insulator |
| Ba2Cu4Er1O8.ICSD_75687     | metal      | metal     |

Supplementary Table 149. Five-fold cross validated predictions for the metal/insulator classification (141/598).

| system                    | calculated | predicted |
|---------------------------|------------|-----------|
| Ba2Cu4Ho1O8.ICSD_75688    | metal      | metal     |
| Ba2Cu4O8Y1.ICSD_74259     | metal      | metal     |
| Ba2Cu5F14.ICSD_202138     | insulator  | insulator |
| Ba2Dy1Ga1Se5.ICSD_262886  | insulator  | insulator |
| Ba2Dy1Nb1O6.ICSD_109156   | insulator  | insulator |
| Ba2Dy1O6Re1.ICSD_25396    | metal      | metal     |
| Ba2Dy1O6Sb1.ICSD_150863   | insulator  | insulator |
| Ba2Er1Ga1Se5.ICSD_262887  | insulator  | insulator |
| Ba2Er1Nb1O6.ICSD_245456   | insulator  | insulator |
| Ba2Er1O6Ru1.ICSD_59743    | insulator  | insulator |
| Ba2Er1O6Sb1.ICSD_245459   | insulator  | insulator |
| Ba2Eu1Nb1O6.ICSD_109154   | metal      | metal     |
| Ba2Eu1Nb1O6.ICSD_245798   | metal      | metal     |
| Ba2Eu1O6Re1.ICSD_25394    | metal      | metal     |
| Ba2Eu1O6Sb1.ICSD_38330    | metal      | metal     |
| Ba2Eu1O6Ta1.ICSD_160171   | metal      | metal     |
| Ba2Eu3Si7.ICSD_83676      | metal      | metal     |
| Ba2F10I2Pb4.ICSD_411088   | insulator  | insulator |
| Ba2F10Mg3.ICSD_50228      | insulator  | insulator |
| Ba2F10Ni3.ICSD_23364      | insulator  | insulator |
| Ba2F18Ni7.ICSD_65610      | insulator  | insulator |
| Ba2F18Zn7.ICSD_40925      | insulator  | insulator |
| Ba2F1In1O3.ICSD_79261     | insulator  | insulator |
| Ba2F1N1.ICSD_262049       | insulator  | insulator |
| Ba2F2Fe2O1S2.ICSD_249689  | insulator  | insulator |
| Ba2F2Fe2O1Se2.ICSD_249687 | insulator  | insulator |
| Ba2F2Mn2O1Se2.ICSD_183149 | insulator  | insulator |
| Ba2F2O2Pd1.ICSD_98141     | metal      | insulator |
| Ba2F2S3Sn1.ICSD_171343    | insulator  | insulator |
| Ba2F2Se3Sn1.ICSD_171344   | insulator  | insulator |
| Ba2F4O3W1.ICSD_33271      | insulator  | insulator |
| Ba2F6Ni1.ICSD_21056       | insulator  | insulator |
| Ba2F6O1Ti1.ICSD_72150     | insulator  | insulator |
| Ba2F6Pd1.ICSD_88802       | insulator  | insulator |
| Ba2F6Zn1.ICSD_21054       | insulator  | insulator |
| Ba2F8Zr1.ICSD_85720       | insulator  | insulator |
| Ba2Fe1Ge2O7.ICSD_22358    | insulator  | insulator |
| Ba2Fe1Mo1O6.ICSD_246543   | insulator  | metal     |
| Ba2Fe1Mo1O6.ICSD_246546   | metal      | metal     |
| Ba2Fe1O6Re1.ICSD_109252   | metal      | metal     |
| Ba2Fe1O6Re1.ICSD_155174   | metal      | metal     |
| Ba2Fe1O6Re1.ICSD_155175   | metal      | metal     |
| Ba2Fe1O6U1.ICSD_27018     | insulator  | metal     |
| Ba2Fe1O6W1.ICSD_95518     | insulator  | metal     |
| Ba2Fe1O6W1.ICSD_95520     | metal      | insulator |
| Ba2Fe1O6W1.ICSD_99061     | insulator  | insulator |
| Ba2Fe1S3.ICSD_615850      | insulator  | insulator |
| Ba2Fe1S5Sb1.ICSD_261418   | insulator  | insulator |
| Ba2Fe1Se3.ICSD_615861     | insulator  | insulator |
| Ba2Fe2Li1N3.ICSD_71060    | metal      | metal     |

Supplementary Table 150. Five-fold cross validated predictions for the metal/insulator classification (142/598).

| system                    | calculated | predicted |
|---------------------------|------------|-----------|
| Ba2Fe3O8Y1_ICSD_67711     | metal      | metal     |
| Ba2Ga1Ge1N1_ICSD_84073    | metal      | insulator |
| Ba2Ga1H1O14P4_ICSD_280043 | insulator  | insulator |
| Ba2Ga2S5_ICSD_38256       | insulator  | insulator |
| Ba2Gd1Mo1O6_ICSD_236354   | metal      | insulator |
| Ba2Gd1Mo1O6_ICSD_236363   | metal      | insulator |
| Ba2Gd1Nb1O6_ICSD_109155   | insulator  | insulator |
| Ba2Gd1Nb1O6_ICSD_172405   | insulator  | insulator |
| Ba2Gd1O6Sb1_ICSD_33618    | metal      | metal     |
| Ba2Ge1P2_ICSD_35150       | insulator  | insulator |
| Ba2Ge1S4_ICSD_615898      | insulator  | insulator |
| Ba2Ge1Se2Te2_ICSD_414165  | insulator  | insulator |
| Ba2Ge1Se4_ICSD_414166     | insulator  | insulator |
| Ba2Ge1_ICSD_25351         | metal      | metal     |
| Ba2Ge2Mg1O7_ICSD_419312   | insulator  | insulator |
| Ba2Ge2Mn1O7_ICSD_184630   | insulator  | insulator |
| Ba2Ge2O1S6Zn1_ICSD_14174  | insulator  | insulator |
| Ba2Ge2O7Zn1_ICSD_420550   | insulator  | insulator |
| Ba2Ge2O8Ti1_ICSD_281271   | insulator  | insulator |
| Ba2Ge2O8Ti1_ICSD_39133    | insulator  | insulator |
| Ba2Ge2Se5_ICSD_410791     | insulator  | insulator |
| Ba2Ge2Te5_ICSD_59001      | insulator  | insulator |
| Ba2Ge4Ni5_ICSD_423268     | metal      | metal     |
| Ba2Ge4Pd5_ICSD_186936     | metal      | metal     |
| Ba2Ge4S10_ICSD_66868      | insulator  | insulator |
| Ba2H1N1_ICSD_67510        | insulator  | insulator |
| Ba2H3I1_ICSD_423520       | insulator  | insulator |
| Ba2H4Pd1_ICSD_165182      | insulator  | metal     |
| Ba2H7O7Tl1_ICSD_411058    | insulator  | insulator |
| Ba2Hf1S4_ICSD_80652       | insulator  | insulator |
| Ba2Hg1S3_ICSD_32647       | insulator  | insulator |
| Ba2Hg1_ICSD_30084         | metal      | metal     |
| Ba2Hg3O14Pd7_ICSD_72312   | metal      | insulator |
| Ba2Ho1Nb1O6_ICSD_109157   | insulator  | insulator |
| Ba2Ho1O6Re1_ICSD_25397    | metal      | metal     |
| Ba2Ho1O6Ru1_ICSD_99638    | insulator  | insulator |
| Ba2Ho1O6Sb1_ICSD_150862   | insulator  | insulator |
| Ba2Ho1O6Ta1_ICSD_158358   | insulator  | insulator |
| Ba2Ho1O6Ta1_ICSD_158359   | insulator  | insulator |
| Ba2I1Na1O6_ICSD_425446    | insulator  | insulator |
| Ba2I2O1_ICSD_391434       | insulator  | insulator |
| Ba2In1Nb1O6_ICSD_172166   | insulator  | insulator |
| Ba2In1O6Ru1_ICSD_15260    | insulator  | insulator |
| Ba2In1O6Ta1_ICSD_261481   | insulator  | insulator |
| Ba2In1Sb1Se5_ICSD_425179  | insulator  | insulator |
| Ba2In1Se5Y1_ICSD_262888   | insulator  | insulator |
| Ba2In1_ICSD_261714        | metal      | metal     |
| Ba2In2O5_ICSD_89438       | insulator  | insulator |
| Ba2In2Se5_ICSD_67187      | insulator  | insulator |
| Ba2Ir1La1O6_ICSD_152678   | insulator  | metal     |

Supplementary Table 151. Five-fold cross validated predictions for the metal/insulator classification (143/598).

| system                    | calculated | predicted |
|---------------------------|------------|-----------|
| Ba2Ir1La1O6_ICSD_174140   | insulator  | insulator |
| Ba2Ir1La1O6_ICSD_247170   | metal      | insulator |
| Ba2Ir1Lu1O6_ICSD_88158    | metal      | insulator |
| Ba2Ir1Nd1O6_ICSD_247171   | metal      | insulator |
| Ba2Ir1O4_ICSD_189053      | metal      | metal     |
| Ba2Ir1O6Pr1_ICSD_150323   | insulator  | metal     |
| Ba2Ir1O6Pr1_ICSD_155828   | insulator  | metal     |
| Ba2Ir1O6Sr1_ICSD_74030    | insulator  | metal     |
| Ba2Ir1O6Tb1_ICSD_171491   | metal      | metal     |
| Ba2Ir1O6Y1_ICSD_152679    | metal      | metal     |
| Ba2Ir1O6Y1_ICSD_88155     | metal      | metal     |
| Ba2Ir3O9_ICSD_54725       | metal      | metal     |
| Ba2K8O24U6_ICSD_91785     | insulator  | insulator |
| Ba2La1O6Re1_ICSD_25392    | metal      | metal     |
| Ba2La1O6Ru1_ICSD_100793   | insulator  | insulator |
| Ba2La1O6Ru1_ICSD_155549   | insulator  | insulator |
| Ba2La1O6Ru1_ICSD_37028    | insulator  | insulator |
| Ba2La1O6Sb1_ICSD_153136   | insulator  | insulator |
| Ba2La1O6Ta1_ICSD_160168   | insulator  | insulator |
| Ba2La1O6Ta1_ICSD_160169   | insulator  | insulator |
| Ba2La1O6Ta1_ICSD_160170   | insulator  | insulator |
| Ba2La2Mn1O12W2_ICSD_54667 | metal      | insulator |
| Ba2Li1N1_ICSD_245651      | metal      | metal     |
| Ba2Li1N4Re1_ICSD_411453   | insulator  | insulator |
| Ba2Li1O6Os1_ICSD_412142   | metal      | metal     |
| Ba2Li1O6Re1_ICSD_109259   | insulator  | insulator |
| Ba2Li3N4Nb1_ICSD_75516    | insulator  | insulator |
| Ba2Li3N4Ta1_ICSD_75031    | insulator  | insulator |
| Ba2Lu1Nb1O6_ICSD_109161   | insulator  | insulator |
| Ba2Lu1O6Ru1_ICSD_202869   | insulator  | insulator |
| Ba2Lu1O6Sb1_ICSD_33622    | metal      | insulator |
| Ba2Mg17_ICSD_150735       | metal      | metal     |
| Ba2Mg1O6Re1_ICSD_98524    | metal      | metal     |
| Ba2Mg1O6U1_ICSD_23099     | insulator  | insulator |
| Ba2Mg1O6W1_ICSD_183771    | insulator  | insulator |
| Ba2Mg1O7Si2_ICSD_183983   | insulator  | insulator |
| Ba2Mg1O7Si2_ICSD_81117    | insulator  | insulator |
| Ba2Mg3Si4_ICSD_408938     | metal      | metal     |
| Ba2Mn1Mo1O6_ICSD_98739    | metal      | metal     |
| Ba2Mn1O3_ICSD_15508       | insulator  | insulator |
| Ba2Mn1O6Re1_ICSD_109256   | metal      | metal     |
| Ba2Mn1O6Te1_ICSD_407802   | metal      | insulator |
| Ba2Mn1O6U1_ICSD_21104     | metal      | insulator |
| Ba2Mn1O6W1_ICSD_51609     | metal      | metal     |
| Ba2Mn1S3_ICSD_26231       | insulator  | insulator |
| Ba2Mn1Se3_ICSD_26230      | insulator  | insulator |
| Ba2Mn1Te3_ICSD_1151       | insulator  | insulator |
| Ba2Mn2O1Sb2_ICSD_16360    | metal      | metal     |
| Ba2Mn8O16_ICSD_62096      | metal      | insulator |
| Ba2Mo1Nd1O6_ICSD_172390   | insulator  | metal     |

Supplementary Table 152. Five-fold cross validated predictions for the metal/insulator classification (144/598).

| system                   | calculated | predicted |
|--------------------------|------------|-----------|
| Ba2Mo1Nd1O6.ICSD_26229   | metal      | metal     |
| Ba2Mo1Ni1O6.ICSD_98192   | insulator  | metal     |
| Ba2Mo1O6V1.ICSD_185890   | metal      | metal     |
| Ba2N1.ICSD_409851        | metal      | metal     |
| Ba2N2Zn1.ICSD_80377      | insulator  | insulator |
| Ba2N3Nb1.ICSD_74906      | insulator  | insulator |
| Ba2N3Ta1.ICSD_74503      | insulator  | insulator |
| Ba2N3V1.ICSD_80177       | insulator  | insulator |
| Ba2N6Ni1O12.ICSD_24508   | metal      | insulator |
| Ba2N8Si5.ICSD_401501     | insulator  | insulator |
| Ba2Na1Nb5O15.ICSD_53267  | insulator  | insulator |
| Ba2Na1Ni3O6.ICSD_59588   | insulator  | insulator |
| Ba2Na1O1.ICSD_411905     | metal      | insulator |
| Ba2Na1O6Os1.ICSD_412143  | metal      | insulator |
| Ba2Na1O6Re1.ICSD_200876  | insulator  | metal     |
| Ba2Nb15O32.ICSD_69991    | metal      | insulator |
| Ba2Nb1Nd1O6.ICSD_109152  | metal      | insulator |
| Ba2Nb1O6Pr1.ICSD_245457  | metal      | insulator |
| Ba2Nb1O6Tb1.ICSD_245455  | insulator  | insulator |
| Ba2Nb1O6Tm1.ICSD_109159  | metal      | insulator |
| Ba2Nb1O6V1.ICSD_185889   | metal      | insulator |
| Ba2Nb1O6Y1.ICSD_172407   | insulator  | insulator |
| Ba2Nb1O6Yb1.ICSD_109160  | metal      | metal     |
| Ba2Nb2O10Te1.ICSD_405153 | insulator  | insulator |
| Ba2Nb5O9.ICSD_78023      | metal      | metal     |
| Ba2Nb6O21Te2.ICSD_405107 | insulator  | insulator |
| Ba2Nd1O6Ru1.ICSD_155551  | insulator  | metal     |
| Ba2Nd1O6Sb1.ICSD_38328   | metal      | metal     |
| Ba2Ni1O6Re1.ICSD_109251  | metal      | insulator |
| Ba2Ni1O6Te1.ICSD_25005   | insulator  | insulator |
| Ba2Ni1O6U1.ICSD_169535   | insulator  | insulator |
| Ba2Ni1O6W1.ICSD_24984    | insulator  | insulator |
| Ba2Ni1Si3.ICSD_280338    | metal      | metal     |
| Ba2Ni3.ICSD_423734       | metal      | metal     |
| Ba2O10Si4.ICSD_100314    | insulator  | insulator |
| Ba2O11Te2V2.ICSD_261183  | insulator  | insulator |
| Ba2O13Ti6.ICSD_300030    | insulator  | insulator |
| Ba2O21Ta6Te2.ICSD_405108 | insulator  | insulator |
| Ba2O3Pd1.ICSD_202812     | insulator  | metal     |
| Ba2O3Zn1.ICSD_36659      | insulator  | insulator |
| Ba2O4Pb1.ICSD_66544      | insulator  | insulator |
| Ba2O4Sn1.ICSD_81849      | insulator  | insulator |
| Ba2O4Ti1.ICSD_2625       | insulator  | insulator |
| Ba2O4V1.ICSD_72625       | insulator  | insulator |
| Ba2O4Zr1.ICSD_39707      | insulator  | insulator |
| Ba2O5Re1.ICSD_202393     | insulator  | insulator |
| Ba2O5Ti2.ICSD_6322       | insulator  | insulator |
| Ba2O5W1.ICSD_62489       | insulator  | insulator |
| Ba2O6Pb1U1.ICSD_167504   | insulator  | insulator |
| Ba2O6Pr1Pt1.ICSD_80636   | metal      | insulator |

Supplementary Table 153. Five-fold cross validated predictions for the metal/insulator classification (145/598).

| system                  | calculated | predicted |
|-------------------------|------------|-----------|
| Ba2O6Pr1Ru1.ICSD_155550 | metal      | insulator |
| Ba2O6Pr1Sb1.ICSD_153137 | insulator  | insulator |
| Ba2O6Pr1Sb1.ICSD_77660  | metal      | metal     |
| Ba2O6Re1Tb1.ICSD_25395  | metal      | metal     |
| Ba2O6Re1Tm1.ICSD_25398  | metal      | metal     |
| Ba2O6Re1Y1.ICSD_94215   | metal      | metal     |
| Ba2O6Re1Yb1.ICSD_25399  | metal      | metal     |
| Ba2O6Re1Zn1.ICSD_109255 | metal      | insulator |
| Ba2O6Ru1Tm1.ICSD_55713  | metal      | insulator |
| Ba2O6Ru1Y1.ICSD_202864  | insulator  | insulator |
| Ba2O6Ru1Yb1.ICSD_55714  | metal      | metal     |
| Ba2O6Sb1Sc1.ICSD_33623  | metal      | insulator |
| Ba2O6Sb1Tb1.ICSD_38332  | insulator  | metal     |
| Ba2O6Sb1Y1.ICSD_33624   | metal      | insulator |
| Ba2O6Sb1Y1.ICSD_84650   | insulator  | insulator |
| Ba2O6Sb1Yb1.ICSD_33621  | metal      | metal     |
| Ba2O6Sb1Yb1.ICSD_38336  | metal      | metal     |
| Ba2O6Sr1Te1.ICSD_246109 | insulator  | insulator |
| Ba2O6Sr1W1.ICSD_246114  | insulator  | insulator |
| Ba2O6Ta1Y1.ICSD_171176  | insulator  | insulator |
| Ba2O6Ta1Y1.ICSD_261453  | insulator  | insulator |
| Ba2O6Ta1Yb1.ICSD_91001  | metal      | metal     |
| Ba2O6U1Zn1.ICSD_167502  | insulator  | insulator |
| Ba2O6W1Zn1.ICSD_423034  | insulator  | insulator |
| Ba2O7P2.ICSD_261125     | insulator  | insulator |
| Ba2O7Si2Zn1.ICSD_409588 | insulator  | insulator |
| Ba2O7U2.ICSD_63076      | insulator  | insulator |
| Ba2O8Si2Ti1.ICSD_201844 | insulator  | insulator |
| Ba2O8Si2V1.ICSD_51479   | insulator  | insulator |
| Ba2O9P2Te1.ICSD_416032  | insulator  | insulator |
| Ba2O9P2V1.ICSD_56849    | metal      | insulator |
| Ba2O9V3.ICSD_404713     | insulator  | insulator |
| Ba2P3Pd1.ICSD_75019     | metal      | insulator |
| Ba2Pb1.ICSD_58666       | metal      | metal     |
| Ba2Re6S11.ICSD_201072   | insulator  | insulator |
| Ba2S3Zn1.ICSD_653999    | insulator  | insulator |
| Ba2S3.ICSD_70058        | insulator  | insulator |
| Ba2S4Si1.ICSD_42661     | insulator  | insulator |
| Ba2S4Sn1.ICSD_16273     | insulator  | insulator |
| Ba2S4Sn1.ICSD_42036     | insulator  | insulator |
| Ba2S4Ti1.ICSD_616084    | insulator  | insulator |
| Ba2S4Zr1.ICSD_80651     | insulator  | insulator |
| Ba2Sb1.ICSD_41837       | metal      | metal     |
| Ba2Sb2Zn1.ICSD_421425   | insulator  | metal     |
| Ba2Sb3.ICSD_61089       | insulator  | insulator |
| Ba2Sb6Sn3.ICSD_82529    | metal      | metal     |
| Ba2Se4Si1.ICSD_49750    | insulator  | insulator |
| Ba2Se5Sn1.ICSD_248033   | insulator  | insulator |
| Ba2Si1Te4.ICSD_49751    | insulator  | insulator |
| Ba2Si1.ICSD_52698       | metal      | metal     |

Supplementary Table 154. Five-fold cross validated predictions for the metal/insulator classification (146/598).

| system                     | calculated | predicted |
|----------------------------|------------|-----------|
| Ba2Si46.ICSD.94262         | metal      | metal     |
| Ba2Sn1Te5.ICSD.81371       | metal      | insulator |
| Ba2Sn1.ICSD.58679          | metal      | metal     |
| Ba2Sn6Yb2.ICSD.249516      | metal      | metal     |
| Ba2Zn1.ICSD.616175         | metal      | metal     |
| Ba3Be1Cl18Zr6.ICSD.33993   | insulator  | insulator |
| Ba3Bi1Cl3O3.ICSD.69618     | insulator  | insulator |
| Ba3Bi1Ir2O9.ICSD.174292    | insulator  | metal     |
| Ba3Bi1N1.ICSD.152055       | insulator  | insulator |
| Ba3Bi1Na1O6.ICSD.72839     | insulator  | insulator |
| Ba3Bi1O9Ru2.ICSD.72448     | insulator  | insulator |
| Ba3Bi2O16P4.ICSD.61061     | insulator  | insulator |
| Ba3Bi2O9Te1.ICSD.90842     | insulator  | insulator |
| Ba3Br2Fe2O5.ICSD.48179     | insulator  | insulator |
| Ba3C1Cl4O3.ICSD.174065     | insulator  | insulator |
| Ba3C1F7O3Sc1.ICSD.75255    | insulator  | insulator |
| Ba3C5F2La2O15.ICSD.72445   | insulator  | insulator |
| Ba3C60.ICSD.70063          | metal      | insulator |
| Ba3Ca1Ir2O9.ICSD.245253    | metal      | insulator |
| Ba3Ca1Ir2O9.ICSD.246280    | metal      | metal     |
| Ba3Ca1O9Ru2.ICSD.152482    | insulator  | insulator |
| Ba3Ca1O9Ru2.ICSD.71209     | insulator  | insulator |
| Ba3Ca1O9Ru2.ICSD.73183     | insulator  | insulator |
| Ba3Ca1O9Sb2.ICSD.249664    | insulator  | insulator |
| Ba3Ca2N6Si2.ICSD.187336    | insulator  | insulator |
| Ba3Cd2Sb4.ICSD.173685      | metal      | metal     |
| Ba3Ce1O9Ru2.ICSD.401912    | metal      | metal     |
| Ba3Ce1O9Ru2.ICSD.94024     | metal      | metal     |
| Ba3Cl2Cu2O4.ICSD.115       | insulator  | insulator |
| Ba3Cl2Fe2O5.ICSD.48178     | insulator  | insulator |
| Ba3Cl2O5W1.ICSD.63518      | insulator  | insulator |
| Ba3Co1Nb2O9.ICSD.150431    | insulator  | insulator |
| Ba3Co1O9Ru2.ICSD.50830     | metal      | insulator |
| Ba3Co1O9Ru2.ICSD.69092     | insulator  | metal     |
| Ba3Co1O9Sb2.ICSD.151442    | insulator  | insulator |
| Ba3Cr1N3.ICSD.154802       | metal      | metal     |
| Ba3Cr1O5.ICSD.73893        | insulator  | insulator |
| Ba3Cr1S5.ICSD.97539        | metal      | insulator |
| Ba3Cr2Mo1O9.ICSD.81071     | insulator  | insulator |
| Ba3Cr2O8.ICSD.9457         | metal      | insulator |
| Ba3Cr2O9W1.ICSD.81072      | insulator  | insulator |
| Ba3Cr2S6.ICSD.97540        | insulator  | insulator |
| Ba3Cu1O9Sb2.ICSD.2279      | metal      | insulator |
| Ba3Cu2Er2O10Pt1.ICSD.69569 | insulator  | insulator |
| Ba3Cu2Ho2O10Pt1.ICSD.62391 | insulator  | insulator |
| Ba3Cu2O10Pt1Y2.ICSD.62390  | insulator  | insulator |
| Ba3Dy1O9Ru2.ICSD.401914    | insulator  | insulator |
| Ba3Dy4O9.ICSD.72480        | insulator  | insulator |
| Ba3Er1O9Ru2.ICSD.401915    | insulator  | insulator |
| Ba3Er4O9.ICSD.72481        | insulator  | insulator |

Supplementary Table 155. Five-fold cross validated predictions for the metal/insulator classification (147/598).

| system                      | calculated | predicted |
|-----------------------------|------------|-----------|
| Ba3F12In2.ICSD.48182        | insulator  | insulator |
| Ba3Fe1N3.ICSD.36502         | metal      | metal     |
| Ba3Fe1O5.ICSD.281029        | metal      | insulator |
| Ba3Fe1S5.ICSD.280           | insulator  | insulator |
| Ba3Fe3Nb1O14Si2.ICSD.162894 | insulator  | insulator |
| Ba3Fe3Se7.ICSD.16310        | insulator  | insulator |
| Ba3Ga2Ge4O14.ICSD.250124    | insulator  | insulator |
| Ba3Ga2N4.ICSD.82736         | insulator  | insulator |
| Ba3Ga2S6.ICSD.201421        | insulator  | insulator |
| Ba3Ga3Nb1O14Si2.ICSD.154215 | insulator  | insulator |
| Ba3Ge1O1.ICSD.50512         | insulator  | metal     |
| Ba3Ge2N2.ICSD.81819         | metal      | metal     |
| Ba3Ge4.ICSD.391060          | metal      | metal     |
| Ba3Ge4.ICSD.391061          | metal      | metal     |
| Ba3Ge5.ICSD.167163          | metal      | metal     |
| Ba3Hg10In1.ICSD.290305      | metal      | metal     |
| Ba3Ho4O9.ICSD.33807         | insulator  | insulator |
| Ba3I2P3.ICSD.391128         | metal      | insulator |
| Ba3In1O9Ru2.ICSD.15261      | insulator  | insulator |
| Ba3In2O11Zn5.ICSD.73192     | insulator  | insulator |
| Ba3In2P4.ICSD.402812        | insulator  | insulator |
| Ba3Ir1Na1O6.ICSD.405134     | metal      | metal     |
| Ba3Ir2La1O9.ICSD.174293     | metal      | insulator |
| Ba3Ir2Li1O9.ICSD.413453     | metal      | metal     |
| Ba3Ir2Mg1O9.ICSD.245251     | metal      | metal     |
| Ba3Ir2Na1O9.ICSD.413452     | insulator  | metal     |
| Ba3Ir2Ni1O9.ICSD.33530      | metal      | metal     |
| Ba3Ir2O9Sr1.ICSD.245254     | insulator  | metal     |
| Ba3Ir2O9Y1.ICSD.16365       | metal      | insulator |
| Ba3Ir2O9Y1.ICSD.16367       | insulator  | metal     |
| Ba3La1O9Ru2.ICSD.51926      | insulator  | insulator |
| Ba3Li1N1.ICSD.245652        | metal      | metal     |
| Ba3Li1O9Os2.ICSD.281247     | metal      | metal     |
| Ba3Li4Sb4.ICSD.615946       | metal      | metal     |
| Ba3Li4Sn8.ICSD.240016       | metal      | metal     |
| Ba3Lu1O9Ru2.ICSD.51929      | insulator  | insulator |
| Ba3Lu4O9.ICSD.38383         | insulator  | insulator |
| Ba3Mg1O8Si2.ICSD.419862     | insulator  | insulator |
| Ba3Mg1O9Ru2.ICSD.33529      | insulator  | insulator |
| Ba3Mg1O9Sb2.ICSD.33527      | insulator  | insulator |
| Ba3Mn1N3.ICSD.80771         | metal      | metal     |
| Ba3Mn1Nb2O9.ICSD.171479     | metal      | insulator |
| Ba3Mn2O8.ICSD.280045        | insulator  | insulator |
| Ba3N1Na1.ICSD.67497         | metal      | metal     |
| Ba3N1Sb1.ICSD.152054        | insulator  | insulator |
| Ba3N1.ICSD.77730            | metal      | metal     |
| Ba3N2O12Si6.ICSD.421322     | insulator  | insulator |
| Ba3N2O1Zn1.ICSD.55536       | insulator  | insulator |
| Ba3N4O9Si6.ICSD.415918      | insulator  | insulator |
| Ba3N8O6P6.ICSD.710077       | insulator  | insulator |

Supplementary Table 156. Five-fold cross validated predictions for the metal/insulator classification (148/598).

| system                      | calculated | predicted |
|-----------------------------|------------|-----------|
| Ba3Na1Nb1O6.ICSD.72330      | insulator  | insulator |
| Ba3Na1O6Ru1.ICSD.405133     | insulator  | insulator |
| Ba3Na1O6Ta1.ICSD.72331      | insulator  | insulator |
| Ba3Na1O9Os2.ICSD.281248     | metal      | insulator |
| Ba3Na1O9Ru2.ICSD.281127     | metal      | insulator |
| Ba3Nb2O18P4.ICSD.90878      | insulator  | insulator |
| Ba3Nb2O8.ICSD.95193         | insulator  | insulator |
| Ba3Nb2O9Sr1.ICSD.24390      | insulator  | insulator |
| Ba3Nb2O9Sr1.ICSD.37161      | insulator  | insulator |
| Ba3Nb2O9Zn1.ICSD.157044     | insulator  | insulator |
| Ba3Nb5O15.ICSD.69993        | metal      | insulator |
| Ba3Nb6O26Si4.ICSD.16029     | insulator  | insulator |
| Ba3Ni1O4.ICSD.30662         | insulator  | insulator |
| Ba3Ni1O9Ru2.ICSD.50831      | insulator  | insulator |
| Ba3Ni1O9Sb2.ICSD.1177       | insulator  | insulator |
| Ba3Ni1O9Ta2.ICSD.240281     | insulator  | insulator |
| Ba3O11Te4.ICSD.37069        | insulator  | insulator |
| Ba3O13P4.ICSD.280908        | insulator  | insulator |
| Ba3O1Pb1.ICSD.100791        | metal      | metal     |
| Ba3O1Sb2.ICSD.280592        | insulator  | insulator |
| Ba3O1Sb4.ICSD.415032        | insulator  | insulator |
| Ba3O1Sn1.ICSD.100792        | metal      | metal     |
| Ba3O20Si4Te1Zn6.ICSD.416231 | insulator  | insulator |
| Ba3O23Si4Ta6.ICSD.18316     | insulator  | insulator |
| Ba3O26Si4Ta6.ICSD.18317     | insulator  | insulator |
| Ba3O3S4V2.ICSD.279607       | insulator  | insulator |
| Ba3O4P2Se4.ICSD.414638      | insulator  | insulator |
| Ba3O5Si1.ICSD.1449          | insulator  | insulator |
| Ba3O6Sb2.ICSD.413764        | insulator  | insulator |
| Ba3O6W1.ICSD.76437          | insulator  | insulator |
| Ba3O8P2.ICSD.69450          | insulator  | insulator |
| Ba3O8V2.ICSD.78169          | insulator  | insulator |
| Ba3O9Ru2Sr1.ICSD.48102      | insulator  | insulator |
| Ba3O9Ru2Tb1.ICSD.95165      | insulator  | insulator |
| Ba3O9Ru2Y1.ICSD.51924       | insulator  | insulator |
| Ba3O9Ru2Yb1.ICSD.400598     | metal      | insulator |
| Ba3O9Ru2Zn1.ICSD.69090      | insulator  | insulator |
| Ba3O9Ru2Zr1.ICSD.172754     | metal      | metal     |
| Ba3O9Sb2Sr1.ICSD.249663     | insulator  | insulator |
| Ba3O9Sr1Ta2.ICSD.24391      | insulator  | insulator |
| Ba3O9Sr1Ta2.ICSD.27496      | insulator  | insulator |
| Ba3O9Sr1Ta2.ICSD.37162      | insulator  | insulator |
| Ba3O9Te2.ICSD.100797        | insulator  | insulator |
| Ba3O9Y4.ICSD.87118          | insulator  | insulator |
| Ba3O9Yb4.ICSD.33239         | metal      | insulator |
| Ba3P14.ICSD.23629           | metal      | insulator |
| Ba3P2S8.ICSD.417422         | insulator  | insulator |
| Ba3P4Sn2.ICSD.80132         | insulator  | insulator |
| Ba3P4.ICSD.38322            | insulator  | insulator |
| Ba3P6Si4.ICSD.29261         | insulator  | insulator |

Supplementary Table 157. Five-fold cross validated predictions for the metal/insulator classification (149/598).

| system                         | calculated | predicted |
|--------------------------------|------------|-----------|
| Ba3Pb5.ICSD.165184             | metal      | metal     |
| Ba3S5Si1.ICSD.26377            | insulator  | insulator |
| Ba3S5Ti1.ICSD.203087           | insulator  | insulator |
| Ba3S7Sn2.ICSD.166524           | insulator  | insulator |
| Ba3S7Zr2.ICSD.59271            | insulator  | insulator |
| Ba3S8Ta2.ICSD.202878           | insulator  | insulator |
| Ba3Si4.ICSD.419308             | metal      | metal     |
| Ba3Sn5.ICSD.167166             | metal      | metal     |
| Ba4Bi3.ICSD.96943              | metal      | metal     |
| Ba4Br2Si3.ICSD.411640          | insulator  | insulator |
| Ba4Br6O1.ICSD.391435           | insulator  | insulator |
| Ba4C2Cu1Li1O10.ICSD.401122     | insulator  | insulator |
| Ba4C2Cu1Na1O10.ICSD.66776      | insulator  | insulator |
| Ba4Cd3S10Tb2.ICSD.411167       | insulator  | insulator |
| Ba4Ce1Mn3O12.ICSD.99661        | insulator  | insulator |
| Ba4Cl12Co2.ICSD.280274         | insulator  | insulator |
| Ba4Cl1O18Os6.ICSD.82910        | metal      | metal     |
| Ba4Cl2N4W1.ICSD.50003          | insulator  | insulator |
| Ba4Cl6O1.ICSD.16026            | insulator  | insulator |
| Ba4Cu2Nd2O9.ICSD.73904         | metal      | insulator |
| Ba4Cu3O9Yb1.ICSD.69718         | metal      | metal     |
| Ba4Cu6O13Y2.ICSD.390001        | metal      | metal     |
| Ba4Er1O12Ru3.ICSD.174186       | insulator  | insulator |
| Ba4F24H1P3.ICSD.419143         | insulator  | insulator |
| Ba4Fe2I5S4.ICSD.173357         | metal      | insulator |
| Ba4Ga2S7.ICSD.201420           | insulator  | insulator |
| Ba4Ge1P4.ICSD.32560            | insulator  | insulator |
| Ba4Ge20Ni3.ICSD.57034          | metal      | metal     |
| Ba4Ge20Pd3.ICSD.57035          | metal      | metal     |
| Ba4Ge20Pt3.ICSD.615897         | metal      | metal     |
| Ba4H0.666Nb2O9.333.ICSD.165531 | insulator  | insulator |
| Ba4Hf3S10.ICSD.602359          | insulator  | insulator |
| Ba4Ho1O12Ru3.ICSD.160868       | insulator  | insulator |
| Ba4I6O1.ICSD.280584            | insulator  | insulator |
| Ba4In2S8.ICSD.261680           | insulator  | insulator |
| Ba4Ir3O10.ICSD.95063           | metal      | metal     |
| Ba4K1O1Sb3.ICSD.410747         | insulator  | insulator |
| Ba4Li1Nb3O12.ICSD.19009        | insulator  | insulator |
| Ba4Li1O12Ta3.ICSD.19010        | insulator  | insulator |
| Ba4Mg1N6Si2.ICSD.187335        | insulator  | insulator |
| Ba4Mn3Nd1O12.ICSD.156305       | metal      | insulator |
| Ba4Mn3O10.ICSD.51881           | insulator  | insulator |
| Ba4Mn3O12Pr1.ICSD.99662        | insulator  | insulator |
| Ba4Na1O12Sb3.ICSD.160173       | insulator  | insulator |
| Ba4O10Ru3.ICSD.90902           | metal      | insulator |
| Ba4O12Ru3Tb1.ICSD.160870       | metal      | insulator |
| Ba4O12Ru3Zr1.ICSD.47133        | metal      | metal     |
| Ba4O16Si6.ICSD.100310          | insulator  | insulator |
| Ba4O1Rb1Sb3.ICSD.415036        | insulator  | insulator |
| Ba4O1Sb2.ICSD.402284           | insulator  | insulator |

Supplementary Table 158. Five-fold cross validated predictions for the metal/insulator classification (150/598).

| system                     | calculated | predicted |
|----------------------------|------------|-----------|
| Ba4O6Pt1_ICSD_65706        | insulator  | insulator |
| Ba4O9Ta2_ICSD_166900       | insulator  | insulator |
| Ba4P3_ICSD_73206           | insulator  | insulator |
| Ba4P4Si1_ICSD_32559        | insulator  | insulator |
| Ba4P4Ti1_ICSD_380114       | insulator  | insulator |
| Ba4S10Zr3_ICSD_72656       | insulator  | insulator |
| Ba4Sb4Se11_ICSD_31500      | insulator  | insulator |
| Ba5Bi3_ICSD_41839          | metal      | metal     |
| Ba5Bi5In4_ICSD_54853       | metal      | metal     |
| Ba5Br1O12P3_ICSD_409482    | insulator  | insulator |
| Ba5Br2O9Ru2_ICSD_245668    | insulator  | insulator |
| Ba5Br6O4Si1_ICSD_73365     | insulator  | insulator |
| Ba5Cd2O2Sb4_ICSD_423458    | insulator  | insulator |
| Ba5Cl1Mn3O12_ICSD_61356    | insulator  | insulator |
| Ba5Cl1O12P3_ICSD_8191      | insulator  | insulator |
| Ba5Cl1O12V3_ICSD_170769    | insulator  | insulator |
| Ba5Cl1O15Os3_ICSD_80447    | insulator  | insulator |
| Ba5Cl1O15Re3_ICSD_73928    | insulator  | insulator |
| Ba5Cl2O9Ta2_ICSD_240872    | insulator  | insulator |
| Ba5Co5O14_ICSD_153698      | insulator  | insulator |
| Ba5Cr1N5_ICSD_82360        | insulator  | insulator |
| Ba5Er8O21Zn4_ICSD_400436   | insulator  | insulator |
| Ba5Fe4S11_ICSD_16372       | insulator  | insulator |
| Ba5Fe5O14_ICSD_391229      | metal      | insulator |
| Ba5Ga5Pb1_ICSD_416339      | metal      | metal     |
| Ba5Ga5Sn1_ICSD_416340      | metal      | metal     |
| Ba5Gd8O21Zn4_ICSD_94223    | insulator  | insulator |
| Ba5Ge3_ICSD_409375         | metal      | metal     |
| Ba5Hf4S13_ICSD_71936       | insulator  | insulator |
| Ba5Ho8O21Zn4_ICSD_73186    | insulator  | insulator |
| Ba5I3P5_ICSD_391129        | metal      | insulator |
| Ba5In2Sb6_ICSD_62305       | metal      | insulator |
| Ba5Nb4O15_ICSD_157477      | insulator  | insulator |
| Ba5O10Ru2_ICSD_75386       | insulator  | insulator |
| Ba5O15Ta4_ICSD_16028       | insulator  | insulator |
| Ba5O21Yb8Zn4_ICSD_94228    | metal      | insulator |
| Ba5P4_ICSD_413273          | insulator  | insulator |
| Ba5P9_ICSD_98667           | metal      | insulator |
| Ba5Pb3_ICSD_58668          | metal      | metal     |
| Ba5Sb3_ICSD_616108         | metal      | metal     |
| Ba5Sb4_ICSD_280022         | insulator  | metal     |
| Ba5Sb4_ICSD_52693          | insulator  | insulator |
| Ba5Si3_ICSD_24598          | metal      | metal     |
| Ba5Sn3_ICSD_100084         | metal      | metal     |
| Ba6C60_ICSD_70062          | insulator  | metal     |
| Ba6Cl2Eu1F12_ICSD_411225   | insulator  | insulator |
| Ba6Cl2Ir1Nb2O12_ICSD_40693 | metal      | insulator |
| Ba6Cl2O12Pt1Ru2_ICSD_72280 | insulator  | insulator |
| Ba6Cl2O12Ru3_ICSD_99681    | insulator  | insulator |
| Ba6Co25S27_ICSD_71939      | metal      | metal     |

Supplementary Table 159. Five-fold cross validated predictions for the metal/insulator classification (151/598).

| system                     | calculated | predicted |
|----------------------------|------------|-----------|
| Ba6F26Mg7_ICSD_50217       | insulator  | insulator |
| Ba6Ga2P6_ICSD_402177       | insulator  | insulator |
| Ba6Ga5N1_ICSD_77731        | metal      | metal     |
| Ba6Ge5N2_ICSD_154398       | metal      | metal     |
| Ba6Hf5S16_ICSD_71935       | insulator  | insulator |
| Ba6Mg23_ICSD_109225        | metal      | metal     |
| Ba6Mn5O16_ICSD_97017       | insulator  | insulator |
| Ba6N1Na16_ICSD_78394       | metal      | metal     |
| Ba6N6O1Os2_ICSD_419467     | metal      | insulator |
| Ba6N6O1Re2_ICSD_419636     | metal      | insulator |
| Ba6Na2Nb2O17P2_ICSD_249742 | insulator  | insulator |
| Ba6Na2Si46_ICSD_409912     | metal      | metal     |
| Ba6Nb8O30Ti2_ICSD_36081    | insulator  | insulator |
| Ba6Ni25S27_ICSD_83476      | metal      | metal     |
| Ba6O17Ti4Y2_ICSD_96630     | insulator  | insulator |
| Ba6O18W4_ICSD_9725         | insulator  | insulator |
| Ba6P6Sn2_ICSD_35342        | insulator  | insulator |
| Ba6Si46_ICSD_94263         | metal      | metal     |
| Ba7Br2O15Ru4_ICSD_73069    | metal      | metal     |
| Ba7Cl2F12_ICSD_87084       | insulator  | insulator |
| Ba7Cl2O15Ru4_ICSD_71755    | metal      | metal     |
| Ba7Cu1F34Fe6_ICSD_203173   | insulator  | insulator |
| Ba7Ir6O19_ICSD_74686       | insulator  | metal     |
| Ba8Cu1Si16_ICSD_182550     | metal      | insulator |
| Ba8Cu6Ge40_ICSD_172837     | metal      | metal     |
| Ba8Si46_ICSD_90093         | metal      | metal     |
| Ba8Si6Sn1_ICSD_169999      | insulator  | metal     |
| Ba9C1N10Nb2O1_ICSD_412664  | insulator  | insulator |
| Ba9Cl2Cu7O15_ICSD_9628     | metal      | insulator |
| Ba9N12Nb2_ICSD_402743      | insulator  | insulator |
| Ba9O24Sc2Si6_ICSD_75175    | insulator  | insulator |
| Be12Co1_ICSD_616202        | metal      | metal     |
| Be12Cr1_ICSD_150599        | metal      | metal     |
| Be12Fe1_ICSD_616264        | metal      | metal     |
| Be12Mn1_ICSD_616329        | metal      | metal     |
| Be12Mo1_ICSD_616339        | metal      | metal     |
| Be12Nb1_ICSD_616353        | metal      | metal     |
| Be12Pd1_ICSD_109314        | metal      | metal     |
| Be12Pt1_ICSD_109315        | metal      | metal     |
| Be12Ta1_ICSD_616426        | metal      | metal     |
| Be12Ti1_ICSD_58745         | metal      | metal     |
| Be12Ti1_ICSD_616454        | metal      | metal     |
| Be12V1_ICSD_616492         | metal      | metal     |
| Be12W1_ICSD_109316         | metal      | metal     |
| Be13Ca1_ICSD_616187        | metal      | metal     |
| Be13Ce1_ICSD_659553        | metal      | metal     |
| Be13Dy1_ICSD_616260        | metal      | metal     |
| Be13Er1_ICSD_603924        | metal      | metal     |
| Be13Eu1_ICSD_616262        | metal      | metal     |
| Be13Gd1_ICSD_616277        | metal      | metal     |

Supplementary Table 160. Five-fold cross validated predictions for the metal/insulator classification (152/598).

| system                      | calculated | predicted |
|-----------------------------|------------|-----------|
| Be13Hf1_ICSD_616289         | metal      | metal     |
| Be13Ho1_ICSD_616296         | metal      | metal     |
| Be13La1_ICSD_616302         | metal      | metal     |
| Be13Lu1_ICSD_616321         | metal      | metal     |
| Be13Mg1_ICSD_616325         | metal      | metal     |
| Be13Nd1_ICSD_616361         | metal      | metal     |
| Be13Pa1_ICSD_616385         | metal      | metal     |
| Be13Pr1_ICSD_616393         | metal      | metal     |
| Be13Pu1_ICSD_58731          | metal      | metal     |
| Be13Sb1_ICSD_834            | metal      | metal     |
| Be13Sc1_ICSD_616416         | metal      | metal     |
| Be13Sr1_ICSD_616423         | metal      | metal     |
| Be13Tb1_ICSD_616437         | metal      | metal     |
| Be13Th1_ICSD_58740          | metal      | metal     |
| Be13Tm1_ICSD_603925         | metal      | metal     |
| Be13Tm1_ICSD_616468         | metal      | metal     |
| Be13U1_ICSD_58750           | metal      | metal     |
| Be13Y1_ICSD_616507          | metal      | metal     |
| Be13Yb1_ICSD_603926         | metal      | metal     |
| Be13Zr1_ICSD_616516         | metal      | metal     |
| Be15Cu8Ta6_ICSD_58704       | metal      | metal     |
| Be17Ca12O29_ICSD_14359      | insulator  | insulator |
| Be17Hf2_ICSD_616284         | metal      | metal     |
| Be17Hf2_ICSD_616285         | metal      | metal     |
| Be17Nb2_ICSD_58724          | metal      | metal     |
| Be17Os3_ICSD_616380         | metal      | metal     |
| Be17Ru3_ICSD_58735          | metal      | metal     |
| Be17Ta2_ICSD_616430         | metal      | metal     |
| Be17Ti2_ICSD_109217         | metal      | metal     |
| Be17Ti2_ICSD_616452         | metal      | metal     |
| Be17Zr2_ICSD_616514         | metal      | metal     |
| Be1Bi1La3S7_ICSD_616183     | insulator  | insulator |
| Be1Br2_ICSD_92584           | insulator  | insulator |
| Be1C1N2_ICSD_181041         | insulator  | insulator |
| Be1C1N2_ICSD_181042         | insulator  | insulator |
| Be1C4Cl2H16O4S2_ICSD_249588 | insulator  | insulator |
| Be1C4K2O8_ICSD_1446         | insulator  | insulator |
| Be1Ca1F1Na1O6Si2_ICSD_15314 | insulator  | insulator |
| Be1Ca2O7Si2_ICSD_31234      | insulator  | insulator |
| Be1Cl2_ICSD_173559          | insulator  | insulator |
| Be1Cl2_ICSD_173560          | insulator  | insulator |
| Be1Cl2_ICSD_173561          | insulator  | insulator |
| Be1Cl2_ICSD_31696           | insulator  | insulator |
| Be1Cl2_ICSD_78774           | insulator  | insulator |
| Be1Cl4Cs2_ICSD_49622        | insulator  | insulator |
| Be1Co1_ICSD_150619          | metal      | metal     |
| Be1Co1_ICSD_58693           | metal      | metal     |
| Be1Co1_ICSD_616204          | metal      | metal     |
| Be1Cr1Dy3S7_ICSD_616230     | insulator  | insulator |
| Be1Cr1Er3S7_ICSD_616231     | insulator  | insulator |

Supplementary Table 161. Five-fold cross validated predictions for the metal/insulator classification (153/598).

| system                  | calculated | predicted |
|-------------------------|------------|-----------|
| Be1Cr1La3S7_ICSD_616233 | insulator  | insulator |
| Be1Cr1Nd3S7_ICSD_616236 | insulator  | insulator |
| Be1Cr1S7Y3_ICSD_616240  | insulator  | insulator |
| Be1Cs1F3_ICSD_290358    | insulator  | insulator |
| Be1Cs1F3_ICSD_9870      | insulator  | insulator |
| Be1Cs1F4Li1_ICSD_42463  | insulator  | insulator |
| Be1Cs1F4Li1_ICSD_9434   | insulator  | insulator |
| Be1Cs1H3_ICSD_173446    | insulator  | insulator |
| Be1Cs2F4_ICSD_153084    | insulator  | insulator |
| Be1Cs2F4_ICSD_23152     | insulator  | insulator |
| Be1Cu12La1_ICSD_658880  | metal      | metal     |
| Be1Cu1_ICSD_616241      | metal      | metal     |
| Be1F2_ICSD_173557       | insulator  | insulator |
| Be1F2_ICSD_173558       | insulator  | insulator |
| Be1F2_ICSD_261194       | insulator  | insulator |
| Be1F2_ICSD_9481         | insulator  | insulator |
| Be1F3H4N1_ICSD_61060    | insulator  | insulator |
| Be1F4H4Li1N1_ICSD_9433  | insulator  | insulator |
| Be1F4H5Li1N2_ICSD_1903  | insulator  | insulator |
| Be1F4H8N2_ICSD_200916   | insulator  | insulator |
| Be1F4K1Li1_ICSD_2773    | insulator  | insulator |
| Be1F4K2_ICSD_153081     | insulator  | insulator |
| Be1F4K2_ICSD_50337      | insulator  | insulator |
| Be1F4Li2_ICSD_14360     | insulator  | insulator |
| Be1F4Na2_ICSD_20366     | insulator  | insulator |
| Be1F4Na2_ICSD_28105     | insulator  | insulator |
| Be1F4Pb1_ICSD_24568     | insulator  | insulator |
| Be1F4Rb2_ICSD_153082    | insulator  | insulator |
| Be1F4Rb2_ICSD_61800     | insulator  | insulator |
| Be1F4Ti2_ICSD_171183    | insulator  | insulator |
| Be1F4Yb1_ICSD_411132    | insulator  | insulator |
| Be1F5K3_ICSD_14114      | insulator  | insulator |
| Be1F6Ho1K1_ICSD_2143    | insulator  | insulator |
| Be1Ga1La3S7_ICSD_616274 | insulator  | insulator |
| Be1Ge1Na2O4_ICSD_80357  | insulator  | insulator |
| Be1H2O2_ICSD_50445      | insulator  | insulator |
| Be1H2O4Se1_ICSD_410094  | insulator  | insulator |
| Be1H2_ICSD_161367       | insulator  | insulator |
| Be1H3K1_ICSD_173445     | insulator  | insulator |
| Be1H3Li1_ICSD_162770    | insulator  | insulator |
| Be1H3Li1_ICSD_162772    | insulator  | insulator |
| Be1H3Li1_ICSD_162773    | insulator  | insulator |
| Be1H3Li1_ICSD_162774    | insulator  | insulator |
| Be1H3Li1_ICSD_162775    | insulator  | insulator |
| Be1H3Li1_ICSD_173447    | insulator  | insulator |
| Be1H3Na1_ICSD_158250    | insulator  | insulator |
| Be1H3Rb1_ICSD_173449    | insulator  | insulator |
| Be1H4N1O4P1_ICSD_85445  | insulator  | insulator |
| Be1H4Na2_ICSD_159452    | insulator  | insulator |
| Be1H4O4Sr1_ICSD_180022  | insulator  | insulator |

Supplementary Table 162. Five-fold cross validated predictions for the metal/insulator classification (154/598).

| system                  | calculated | predicted |
|-------------------------|------------|-----------|
| Be1H8I2O10.ICSD_83330   | insulator  | insulator |
| Be1H8O8S1.ICSD_74572    | insulator  | insulator |
| Be1H8O8Se1.ICSD_150083  | insulator  | insulator |
| Be1Hf1Si1.ICSD_108103   | metal      | metal     |
| Be1Hf1.ICSD_616286      | metal      | metal     |
| Be1I2.ICSD_92585        | insulator  | insulator |
| Be1In1La3S7.ICSD_616297 | insulator  | insulator |
| Be1K1O4P1.ICSD_4255     | insulator  | insulator |
| Be1K1O9P3.ICSD_40866    | insulator  | insulator |
| Be1K4P2.ICSD_300110     | insulator  | insulator |
| Be1La3S7Sb1.ICSD_616308 | insulator  | insulator |
| Be1La3S7Sc1.ICSD_616309 | insulator  | insulator |
| Be1La3S7Ti1.ICSD_616310 | insulator  | insulator |
| Be1La3S7V1.ICSD_616311  | insulator  | insulator |
| Be1La3S7Yb1.ICSD_616312 | metal      | insulator |
| Be1Li1N1.ICSD_402341    | insulator  | insulator |
| Be1Li1P1.ICSD_616316    | insulator  | insulator |
| Be1Li1Sb1.ICSD_616318   | insulator  | insulator |
| Be1Li1.ICSD_188829      | metal      | metal     |
| Be1Li2O4Si1.ICSD_2319   | insulator  | insulator |
| Be1Mo3.ICSD_58715       | metal      | metal     |
| Be1N2Si1.ICSD_25704     | insulator  | insulator |
| Be1N2Si1.ICSD_44112     | insulator  | insulator |
| Be1N4P2.ICSD_421385     | insulator  | insulator |
| Be1Na1Sb1.ICSD_100092   | insulator  | insulator |
| Be1Na2O2.ICSD_67154     | insulator  | insulator |
| Be1Ni1.ICSD_616363      | metal      | metal     |
| Be1O1.ICSD_163467       | insulator  | insulator |
| Be1O1.ICSD_163826       | insulator  | insulator |
| Be1O1.ICSD_18147        | insulator  | insulator |
| Be1O1.ICSD_34237        | insulator  | insulator |
| Be1O4S1.ICSD_44801      | insulator  | insulator |
| Be1O6P2.ICSD_100404     | insulator  | insulator |
| Be1P2.ICSD_2262         | insulator  | insulator |
| Be1Pd1.ICSD_58728       | metal      | metal     |
| Be1Pd2.ICSD_107609      | metal      | metal     |
| Be1Pd3.ICSD_107610      | metal      | metal     |
| Be1Rh1.ICSD_58734       | metal      | metal     |
| Be1S1.ICSD_186889       | insulator  | insulator |
| Be1S1.ICSD_52719        | insulator  | insulator |
| Be1Se1.ICSD_52720       | insulator  | insulator |
| Be1Se1.ICSD_616419      | insulator  | insulator |
| Be1Si1Zr1.ICSD_76123    | metal      | metal     |
| Be1Ta2.ICSD_58738       | metal      | metal     |
| Be1Te1.ICSD_290008      | insulator  | metal     |
| Be1Te1.ICSD_52722       | metal      | insulator |
| Be1Ti1.ICSD_616457      | metal      | metal     |
| Be1Zn13.ICSD_174029     | metal      | metal     |
| Be1.ICSD_52263          | metal      | metal     |
| Be1.ICSD_52706          | metal      | metal     |

Supplementary Table 163. Five-fold cross validated predictions for the metal/insulator classification (155/598).

| system                       | calculated | predicted |
|------------------------------|------------|-----------|
| Be1.ICSD_52708               | metal      | metal     |
| Be22Mo1.ICSD_616336          | metal      | metal     |
| Be22Re1.ICSD_616399          | metal      | metal     |
| Be22Tc1.ICSD_616438          | metal      | metal     |
| Be22W1.ICSD_616499           | metal      | metal     |
| Be2C1.ICSD_183009            | insulator  | metal     |
| Be2Ca1Ge2.ICSD_25337         | metal      | metal     |
| Be2Ca1P2.ICSD_616191         | insulator  | insulator |
| Be2Ca3H10O20P4.ICSD_40671    | insulator  | insulator |
| Be2Cr1.ICSD_58697            | metal      | metal     |
| Be2Cs1F5.ICSD_2801           | insulator  | insulator |
| Be2Cu1.ICSD_616247           | metal      | metal     |
| Be2Dy2Ge1O7.ICSD_39121       | insulator  | insulator |
| Be2Er2Ge1O7.ICSD_39123       | insulator  | insulator |
| Be2F5Rb1.ICSD_28541          | insulator  | insulator |
| Be2F7H4Li2N1.ICSD_240273     | insulator  | insulator |
| Be2F7Li1Na2.ICSD_9430        | insulator  | insulator |
| Be2F7Li2Rb1.ICSD_72          | insulator  | insulator |
| Be2F8K2Pb1.ICSD_9902         | insulator  | insulator |
| Be2F8K2Sr1.ICSD_109005       | insulator  | insulator |
| Be2Fe1.ICSD_616265           | metal      | metal     |
| Be2Gd2Ge1O7.ICSD_39120       | insulator  | insulator |
| Be2Ge1La2O7.ICSD_39117       | insulator  | insulator |
| Be2Ge1O7Pr2.ICSD_39118       | insulator  | insulator |
| Be2Ge1O7Y2.ICSD_39122        | insulator  | insulator |
| Be2Hf1.ICSD_616288           | metal      | metal     |
| Be2Ho2O7Si1.ICSD_73521       | insulator  | insulator |
| Be2K2Na4O5.ICSD_33849        | insulator  | insulator |
| Be2K4O4.ICSD_23633           | insulator  | insulator |
| Be2La2O5.ICSD_36063          | insulator  | insulator |
| Be2Mg1N2.ICSD_413358         | insulator  | insulator |
| Be2Mg1P2.ICSD_616328         | insulator  | insulator |
| Be2Mn1.ICSD_58714            | metal      | metal     |
| Be2Mo1.ICSD_616337           | metal      | metal     |
| Be2Nb1.ICSD_58721            | metal      | metal     |
| Be2Nb3.ICSD_58722            | metal      | metal     |
| Be2O10P3Rb1.ICSD_72985       | insulator  | insulator |
| Be2O4Si1.ICSD_202275         | insulator  | insulator |
| Be2O7Si1Y2.ICSD_23233        | insulator  | insulator |
| Be2Re1.ICSD_58732            | metal      | metal     |
| Be2Ru1.ICSD_616410           | metal      | metal     |
| Be2Si1.ICSD_183010           | metal      | insulator |
| Be2Ta1.ICSD_58739            | metal      | metal     |
| Be2Ta3.ICSD_616431           | metal      | metal     |
| Be2Ti1.ICSD_616466           | metal      | metal     |
| Be2V1.ICSD_58752             | metal      | metal     |
| Be2W1.ICSD_58754             | metal      | metal     |
| Be2Zn1.ICSD_168955           | metal      | metal     |
| Be2Zr1.ICSD_58756            | metal      | metal     |
| Be3Ca3F2Li2O12Si3.ICSD_39389 | insulator  | insulator |

Supplementary Table 164. Five-fold cross validated predictions for the metal/insulator classification (156/598).

| system                     | calculated | predicted |
|----------------------------|------------|-----------|
| Be3Cd2F12Rb2.ICSD.15155    | insulator  | insulator |
| Be3Cl1Li4O12P3.ICSD.74525  | insulator  | insulator |
| Be3F12K2Mg2.ICSD.15152     | insulator  | insulator |
| Be3F12K2Mn2.ICSD.83658     | insulator  | insulator |
| Be3F12K2Zn2.ICSD.24962     | insulator  | insulator |
| Be3F9K1Zn1.ICSD.18022      | insulator  | insulator |
| Be3F9Rb1Zn1.ICSD.23133     | insulator  | insulator |
| Be3H4O10P2.ICSD.88664      | insulator  | insulator |
| Be3K4O5.ICSD.33808         | insulator  | insulator |
| Be3Mn4O12S1Si3.ICSD.2709   | insulator  | insulator |
| Be3N2.ICSD.185490          | insulator  | insulator |
| Be3N2.ICSD.185491          | insulator  | insulator |
| Be3N2.ICSD.25656           | insulator  | insulator |
| Be3N2.ICSD.412667          | insulator  | insulator |
| Be3Nb1.ICSD.58723          | metal      | metal     |
| Be3O4Sr1.ICSD.26179        | insulator  | insulator |
| Be3P2.ICSD.187677          | insulator  | insulator |
| Be3P2.ICSD.616384          | insulator  | insulator |
| Be3Ru2.ICSD.616409         | metal      | metal     |
| Be3Ta1.ICSD.616429         | metal      | metal     |
| Be3Ti1.ICSD.616451         | metal      | metal     |
| Be4C6K6O19.ICSD.412642     | insulator  | insulator |
| Be4Ca2N4.ICSD.413357       | insulator  | insulator |
| Be4H2O9Si2.ICSD.202360     | insulator  | insulator |
| Be4N4Sr2.ICSD.413356       | insulator  | insulator |
| Be4Na10O17Si4.ICSD.68750   | insulator  | insulator |
| Be4Na1O7Sb1.ICSD.27599     | insulator  | insulator |
| Be4O7Te1.ICSD.1322         | insulator  | insulator |
| Be5Co1.ICSD.616209         | metal      | metal     |
| Be5Fe1.ICSD.616267         | metal      | metal     |
| Be5Hf1.ICSD.58712          | metal      | metal     |
| Be5Pd1.ICSD.616387         | metal      | metal     |
| Be5Pt1.ICSD.616395         | metal      | metal     |
| Be5Sc1.ICSD.58736          | metal      | metal     |
| Be5Zr1.ICSD.58757          | metal      | metal     |
| Be6Br2Li8O24P6.ICSD.80472  | insulator  | insulator |
| Be6Cd8O24S2Si6.ICSD.81485  | insulator  | insulator |
| Be6Cd8O24Se2Si6.ICSD.81486 | insulator  | insulator |
| Be6Cd8O24Si6Te2.ICSD.81487 | insulator  | insulator |
| Be6Fe8O24S2Si6.ICSD.201640 | metal      | metal     |
| Be6Fe8O24Se2Si6.ICSD.97781 | metal      | metal     |
| Be6Fe8O24Si6Te2.ICSD.97782 | metal      | metal     |
| Be6Ge6Mn8O24S2.ICSD.83841  | insulator  | insulator |
| Be6Ge6Mn8O24Se2.ICSD.83842 | insulator  | insulator |
| Be6Mn8O24Se2Si6.ICSD.83839 | insulator  | insulator |
| Be6Mn8O24Si6Te2.ICSD.83840 | insulator  | insulator |
| Be6O24S2Si6Zn8.ICSD.201641 | insulator  | insulator |
| Bi0.67Nb1S2.ICSD.74700     | metal      | metal     |
| Bi0.67S2Ta1.ICSD.108123    | metal      | metal     |
| Bi12Cl12Pt1.ICSD.415739    | insulator  | insulator |

Supplementary Table 165. Five-fold cross validated predictions for the metal/insulator classification (157/598).

| system                     | calculated | predicted |
|----------------------------|------------|-----------|
| Bi12I3Ni4.ICSD.405639      | metal      | metal     |
| Bi12Mn1O20.ICSD.75079      | metal      | insulator |
| Bi12O20Si1.ICSD.422389     | insulator  | insulator |
| Bi12O20Zn1.ICSD.62479      | metal      | insulator |
| Bi14Br16Pd1.ICSD.412895    | insulator  | insulator |
| Bi14I12Ir1Si2.ICSD.410740  | metal      | insulator |
| Bi14I12Rh1Si2.ICSD.410739  | metal      | insulator |
| Bi16I4.ICSD.246145         | metal      | insulator |
| Bi1Br1Cd1S2.ICSD.171725    | insulator  | insulator |
| Bi1Br1Cd1Se2.ICSD.171726   | insulator  | insulator |
| Bi1Br1Cu3O8Se2.ICSD.280759 | insulator  | insulator |
| Bi1Br1Mn1S2.ICSD.415307    | insulator  | insulator |
| Bi1Br1O1.ICSD.61225        | insulator  | insulator |
| Bi1Br1O2Sr1.ICSD.97509     | insulator  | insulator |
| Bi1Br1S1.ICSD.25574        | metal      | metal     |
| Bi1Br1S1.ICSD.31389        | metal      | metal     |
| Bi1Br1.ICSD.1560           | insulator  | insulator |
| Bi1Br3.ICSD.100293         | insulator  | insulator |
| Bi1Br3.ICSD.100294         | insulator  | insulator |
| Bi1Br7Hg6Sb4.ICSD.411218   | insulator  | insulator |
| Bi1Br8O2W2.ICSD.424531     | metal      | insulator |
| Bi1C1Ca1F1O4.ICSD.87759    | insulator  | insulator |
| Bi1C3H6N3S6.ICSD.422349    | insulator  | insulator |
| Bi1C4N4Rb1S4.ICSD.164      | insulator  | insulator |
| Bi1C5H5K2O10.ICSD.109956   | insulator  | insulator |
| Bi1Ca1Cl1O2.ICSD.84635     | insulator  | insulator |
| Bi1Ca1Cu1.ICSD.57018       | metal      | metal     |
| Bi1Ca1Li1.ICSD.616539      | insulator  | metal     |
| Bi1Ca1O5V1.ICSD.73184      | insulator  | insulator |
| Bi1Ca2O6V1.ICSD.50939      | insulator  | insulator |
| Bi1Ca2.ICSD.42136          | insulator  | metal     |
| Bi1Ca3N1.ICSD.106320       | insulator  | metal     |
| Bi1Cd1Cl1O2.ICSD.280770    | insulator  | insulator |
| Bi1Cd1Cl1S2.ICSD.171724    | insulator  | insulator |
| Bi1Cd1I1Se2.ICSD.171727    | insulator  | insulator |
| Bi1Ce1O1S2.ICSD.80         | insulator  | insulator |
| Bi1Ce1Pd1.ICSD.161758      | metal      | insulator |
| Bi1Ce1Pd1.ICSD.616563      | insulator  | metal     |
| Bi1Ce1Pt1.ICSD.616564      | metal      | metal     |
| Bi1Ce1.ICSD.108105         | metal      | metal     |
| Bi1Ce1.ICSD.187507         | metal      | metal     |
| Bi1Ce1.ICSD.58765          | metal      | metal     |
| Bi1Ce1.ICSD.58766          | metal      | metal     |
| Bi1Ce1.ICSD.616547         | metal      | metal     |
| Bi1Ce2O2.ICSD.419606       | metal      | metal     |
| Bi1Cl1Cu3O8Se2.ICSD.54190  | insulator  | insulator |
| Bi1Cl1F8.ICSD.39555        | insulator  | insulator |
| Bi1Cl1Mn1S2.ICSD.172156    | insulator  | insulator |
| Bi1Cl1O1.ICSD.24608        | insulator  | insulator |
| Bi1Cl1O2Sr1.ICSD.84636     | insulator  | insulator |

Supplementary Table 166. Five-fold cross validated predictions for the metal/insulator classification (158/598).

| system                   | calculated | predicted |
|--------------------------|------------|-----------|
| Bi1Cl1O3Se1_ICSD.411169  | insulator  | insulator |
| Bi1Cl1O3Se1_ICSD.98000   | insulator  | insulator |
| Bi1Cl1S1_ICSD.100173     | insulator  | insulator |
| Bi1Cl1Te1_ICSD.79362     | insulator  | insulator |
| Bi1Cl2Cu1S1_ICSD.413289  | insulator  | insulator |
| Bi1Cl2K1O4S1_ICSD.155203 | insulator  | insulator |
| Bi1Cl3O3Sr3_ICSD.80637   | insulator  | insulator |
| Bi1Cl3_ICSD.41179        | insulator  | insulator |
| Bi1Cl4N3S4_ICSD.9460     | insulator  | insulator |
| Bi1Cl6Cs1K2_ICSD.201983  | insulator  | insulator |
| Bi1Cl6Cs2Na1_ICSD.59195  | insulator  | insulator |
| Bi1Cl6Tl3_ICSD.421317    | insulator  | insulator |
| Bi1Cl8F4H3K6_ICSD.39524  | insulator  | insulator |
| Bi1Cl8O2W2_ICSD.424532   | metal      | insulator |
| Bi1Co1O3_ICSD.157833     | insulator  | insulator |
| Bi1Co1Zr1_ICSD.107120    | insulator  | metal     |
| Bi1Co2Cr1_ICSD.167769    | metal      | metal     |
| Bi1Co2Ho5_ICSD.161658    | metal      | metal     |
| Bi1Cr1O3_ICSD.160454     | insulator  | insulator |
| Bi1Cr1O3_ICSD.160456     | insulator  | insulator |
| Bi1Cr2O8Rb1_ICSD.201624  | insulator  | insulator |
| Bi1Cs1F6_ICSD.15122      | insulator  | insulator |
| Bi1Cs1Ge1S4_ICSD.281168  | insulator  | insulator |
| Bi1Cs1O2_ICSD.406564     | insulator  | insulator |
| Bi1Cs1S2_ICSD.72975      | insulator  | insulator |
| Bi1Cs1S4Si1_ICSD.281169  | insulator  | insulator |
| Bi1Cs2F6K1_ICSD.9383     | insulator  | insulator |
| Bi1Cs2F6Na1_ICSD.9382    | insulator  | insulator |
| Bi1Cs2F6Rb1_ICSD.9384    | insulator  | insulator |
| Bi1Cs2F6Th1_ICSD.9385    | insulator  | insulator |
| Bi1Cs3O3_ICSD.406563     | insulator  | insulator |
| Bi1Cs3Se3_ICSD.85410     | insulator  | insulator |
| Bi1Cs3_ICSD.58769        | insulator  | insulator |
| Bi1Cs3_ICSD.659568       | insulator  | insulator |
| Bi1Cu1Eu1_ICSD.58772     | metal      | metal     |
| Bi1Cu1Mg1_ICSD.58774     | metal      | metal     |
| Bi1Cu1O1Se1_ICSD.74475   | insulator  | metal     |
| Bi1Cu1O1Te1_ICSD.159475  | metal      | insulator |
| Bi1Cu1O8W2_ICSD.67569    | insulator  | insulator |
| Bi1Cu1P2Se6_ICSD.170643  | insulator  | insulator |
| Bi1Cu1Pb1S3_ICSD.9120    | insulator  | insulator |
| Bi1Cu1Pt1S3_ICSD.180450  | insulator  | insulator |
| Bi1Cu1S2_ICSD.38779      | insulator  | insulator |
| Bi1Cu1Sr1_ICSD.58777     | metal      | metal     |
| Bi1Cu1Yb1_ICSD.416142    | metal      | metal     |
| Bi1Cu1Yb1_ICSD.416144    | metal      | metal     |
| Bi1Cu1_ICSD.616577       | metal      | metal     |
| Bi1Cu2O6P1_ICSD.75387    | insulator  | insulator |
| Bi1Cu3I1O8Se2_ICSD.54191 | insulator  | insulator |
| Bi1Cu3S3_ICSD.616615     | insulator  | insulator |

Supplementary Table 167. Five-fold cross validated predictions for the metal/insulator classification (159/598).

| system                    | calculated | predicted |
|---------------------------|------------|-----------|
| Bi1Dy1Ni1_ICSD.58779      | insulator  | metal     |
| Bi1Dy1Pd1_ICSD.616637     | metal      | metal     |
| Bi1Dy1Pt1_ICSD.58780      | metal      | metal     |
| Bi1Dy1Rh1_ICSD.51845      | metal      | metal     |
| Bi1Dy1_ICSD.58778         | metal      | metal     |
| Bi1Dy2O2_ICSD.423915      | metal      | metal     |
| Bi1Er1Ge1O5_ICSD.96409    | insulator  | insulator |
| Bi1Er1Pt1_ICSD.58782      | metal      | metal     |
| Bi1Er1_ICSD.656440        | metal      | metal     |
| Bi1Er2O2_ICSD.422647      | metal      | metal     |
| Bi1Er5Pt2_ICSD.107217     | metal      | metal     |
| Bi1F1O1_ICSD.24096        | insulator  | insulator |
| Bi1F3_ICSD.1269           | insulator  | insulator |
| Bi1F3_ICSD.25567          | insulator  | insulator |
| Bi1F3_ICSD.655136         | insulator  | insulator |
| Bi1F4K1_ICSD.63166        | insulator  | insulator |
| Bi1F4Li1_ICSD.65404       | insulator  | insulator |
| Bi1F4Rb1_ICSD.63167       | insulator  | insulator |
| Bi1F5K2_ICSD.418777       | insulator  | insulator |
| Bi1F5_ICSD.25023          | insulator  | insulator |
| Bi1F6K1Rb2_ICSD.9387      | insulator  | insulator |
| Bi1F6K1_ICSD.25024        | insulator  | insulator |
| Bi1F6K1_ICSD.25025        | insulator  | insulator |
| Bi1F6Li1_ICSD.15119       | insulator  | insulator |
| Bi1F6Na1Rb2_ICSD.9386     | insulator  | insulator |
| Bi1F6Na1_ICSD.15120       | insulator  | insulator |
| Bi1F6Rb1_ICSD.15121       | insulator  | insulator |
| Bi1F7Kr1_ICSD.279626      | insulator  | insulator |
| Bi1Fe1O3_ICSD.162264      | insulator  | insulator |
| Bi1Fe1O3_ICSD.162834      | metal      | insulator |
| Bi1Fe1O3_ICSD.168320      | insulator  | insulator |
| Bi1Fe1O3_ICSD.168321      | insulator  | insulator |
| Bi1Fe1O3_ICSD.180498      | insulator  | insulator |
| Bi1Fe1O3_ICSD.188467      | insulator  | insulator |
| Bi1Fe1O3_ICSD.20288       | metal      | metal     |
| Bi1Fe1O3_ICSD.20372       | metal      | insulator |
| Bi1Fe1O3_ICSD.22342       | insulator  | insulator |
| Bi1Fe2H1O9Si2_ICSD.200069 | insulator  | insulator |
| Bi1Ga1O3_ICSD.157550      | insulator  | insulator |
| Bi1Ga1O3_ICSD.171709      | insulator  | insulator |
| Bi1Ga1_ICSD.167768        | metal      | metal     |
| Bi1Gd1Ni1_ICSD.58785      | metal      | metal     |
| Bi1Gd1Pd1_ICSD.616671     | metal      | metal     |
| Bi1Gd1Pt1_ICSD.58786      | metal      | metal     |
| Bi1Gd1_ICSD.58783         | metal      | metal     |
| Bi1Gd2O2_ICSD.261435      | metal      | metal     |
| Bi1Ge1K1S4_ICSD.421486    | insulator  | insulator |
| Bi1Ge1Rb1S4_ICSD.281167   | insulator  | insulator |
| Bi1H1O12P4_ICSD.1967      | insulator  | insulator |
| Bi1H1O7Sr4_ICSD.419369    | insulator  | insulator |

Supplementary Table 168. Five-fold cross validated predictions for the metal/insulator classification (160/598).

| system                  | calculated | predicted |
|-------------------------|------------|-----------|
| Bi1Hf2_ICSD_168286      | metal      | metal     |
| Bi1Ho1Ni1_ICSD_616692   | metal      | insulator |
| Bi1Ho1Pd1_ICSD_616693   | metal      | metal     |
| Bi1Ho1Pt1_ICSD_58788    | metal      | metal     |
| Bi1Ho1_ICSD_187366      | metal      | metal     |
| Bi1Ho1_ICSD_43545       | metal      | metal     |
| Bi1Ho2O2_ICSD_423914    | metal      | metal     |
| Bi1I1Mn1Se2_ICSD_415138 | insulator  | insulator |
| Bi1I1O1_ICSD_391354     | insulator  | insulator |
| Bi1I1O2Sr1_ICSD_97510   | insulator  | insulator |
| Bi1I1O3Te1_ICSD_56218   | insulator  | insulator |
| Bi1I1O3Te1_ICSD_92318   | metal      | insulator |
| Bi1I1O4_ICSD_262019     | insulator  | insulator |
| Bi1I1S1_ICSD_23631      | metal      | insulator |
| Bi1I1S1_ICSD_25575      | insulator  | insulator |
| Bi1I1Se1_ICSD_280311    | insulator  | insulator |
| Bi1I1Te1_ICSD_263109    | insulator  | insulator |
| Bi1I1_ICSD_1558         | insulator  | insulator |
| Bi1I1_ICSD_1559         | insulator  | insulator |
| Bi1I3_ICSD_187608       | insulator  | insulator |
| Bi1I3_ICSD_187610       | metal      | insulator |
| Bi1I3_ICSD_187611       | insulator  | insulator |
| Bi1I3_ICSD_20676        | insulator  | insulator |
| Bi1I3_ICSD_56570        | insulator  | insulator |
| Bi1I6Ti3_ICSD_417537    | insulator  | insulator |
| Bi1In1O3_ICSD_158758    | insulator  | insulator |
| Bi1In1O3_ICSD_171756    | insulator  | insulator |
| Bi1In1O3_ICSD_171757    | insulator  | insulator |
| Bi1In1S3_ICSD_290195    | insulator  | insulator |
| Bi1In1_ICSD_184573      | metal      | metal     |
| Bi1In1_ICSD_616707      | metal      | metal     |
| Bi1In2_ICSD_108108      | metal      | metal     |
| Bi1In2_ICSD_1247        | metal      | metal     |
| Bi1Ir1S1_ICSD_616740    | insulator  | insulator |
| Bi1Ir1Se1_ICSD_616741   | insulator  | insulator |
| Bi1K1Li6O6_ICSD_71035   | insulator  | insulator |
| Bi1K1Mg1_ICSD_616748    | insulator  | insulator |
| Bi1K1Mn1_ICSD_601586    | metal      | metal     |
| Bi1K1O2_ICSD_407209     | insulator  | insulator |
| Bi1K1O3_ICSD_76976      | insulator  | insulator |
| Bi1K1O8W2_ICSD_391361   | insulator  | insulator |
| Bi1K1P2S6_ICSD_409686   | insulator  | insulator |
| Bi1K1P2Se6_ICSD_90153   | insulator  | insulator |
| Bi1K1S4Si1_ICSD_421485  | insulator  | insulator |
| Bi1K1_ICSD_55065        | insulator  | insulator |
| Bi1K2Rb1Se3_ICSD_85412  | insulator  | insulator |
| Bi1K2Sn1_ICSD_107616    | metal      | insulator |
| Bi1K3O3_ICSD_407293     | insulator  | insulator |
| Bi1K3P2S8_ICSD_81772    | insulator  | insulator |
| Bi1K3Se3_ICSD_78841     | insulator  | insulator |

Supplementary Table 169. Five-fold cross validated predictions for the metal/insulator classification (161/598).

| system                  | calculated | predicted |
|-------------------------|------------|-----------|
| Bi1K3Te3_ICSD_300183    | insulator  | insulator |
| Bi1K3_ICSD_26885        | metal      | metal     |
| Bi1K3_ICSD_409223       | metal      | metal     |
| Bi1K3_ICSD_58793        | metal      | metal     |
| Bi1K9O24U6_ICSD_66528   | insulator  | insulator |
| Bi1La1_ICSD_616762      | metal      | metal     |
| Bi1La2O2_ICSD_422645    | metal      | metal     |
| Bi1Li1Mg1_ICSD_108112   | insulator  | metal     |
| Bi1Li1O2_ICSD_25385     | insulator  | insulator |
| Bi1Li1O3_ICSD_82277     | metal      | insulator |
| Bi1Li1O4Pd2_ICSD_202930 | insulator  | insulator |
| Bi1Li1Sr1_ICSD_58800    | insulator  | insulator |
| Bi1Li1Yb1_ICSD_602201   | insulator  | metal     |
| Bi1Li1Zn1_ICSD_100115   | metal      | metal     |
| Bi1Li1_ICSD_58796       | metal      | metal     |
| Bi1Li3O4_ICSD_109087    | insulator  | insulator |
| Bi1Li3_ICSD_58797       | insulator  | metal     |
| Bi1Li5O5_ICSD_203031    | insulator  | insulator |
| Bi1Lu1Ni1_ICSD_58802    | metal      | metal     |
| Bi1Lu1O6Sr2_ICSD_88149  | metal      | insulator |
| Bi1Lu1_ICSD_58801       | metal      | metal     |
| Bi1Mg1Ni1_ICSD_76253    | metal      | metal     |
| Bi1Mg2O6P1_ICSD_73894   | insulator  | insulator |
| Bi1Mg2O6V1_ICSD_72175   | insulator  | insulator |
| Bi1Mn1Na1_ICSD_601587   | metal      | metal     |
| Bi1Mn1O3_ICSD_245299    | insulator  | insulator |
| Bi1Mn1O3_ICSD_245300    | insulator  | insulator |
| Bi1Mn1O3_ICSD_50795     | insulator  | insulator |
| Bi1Mn1O5V1_ICSD_59720   | insulator  | insulator |
| Bi1Mn1Rb1_ICSD_616824   | metal      | metal     |
| Bi1Mn1_ICSD_58805       | metal      | metal     |
| Bi1Mn2O5_ICSD_169736    | insulator  | insulator |
| Bi1Mn2O6P1_ICSD_59673   | insulator  | insulator |
| Bi1N1Sr3_ICSD_152053    | insulator  | metal     |
| Bi1N2Th2_ICSD_16064     | metal      | metal     |
| Bi1N2U2_ICSD_16061      | metal      | metal     |
| Bi1Na1O2_ICSD_10317     | insulator  | insulator |
| Bi1Na1O3_ICSD_27553     | insulator  | insulator |
| Bi1Na1O6Sr3_ICSD_419367 | insulator  | insulator |
| Bi1Na1_ICSD_58816       | metal      | metal     |
| Bi1Na3O3_ICSD_23347     | insulator  | insulator |
| Bi1Na3O4_ICSD_10319     | insulator  | insulator |
| Bi1Na3_ICSD_26881       | metal      | insulator |
| Bi1Nb1O4_ICSD_415850    | insulator  | insulator |
| Bi1Nb1O4_ICSD_74338     | insulator  | insulator |
| Bi1Nb3_ICSD_58817       | metal      | metal     |
| Bi1Nd1O6Sr2_ICSD_68528  | metal      | insulator |
| Bi1Nd1Pd1_ICSD_616867   | metal      | metal     |
| Bi1Nd1_ICSD_44133       | metal      | metal     |
| Bi1Nd2O2_ICSD_422646    | metal      | metal     |

Supplementary Table 170. Five-fold cross validated predictions for the metal/insulator classification (162/598).

| system                  | calculated | predicted |
|-------------------------|------------|-----------|
| Bi1Ni1Sc1_ICSD_58824    | metal      | metal     |
| Bi1Ni1Se1_ICSD_616878   | metal      | metal     |
| Bi1Ni1Tm1_ICSD_58825    | metal      | metal     |
| Bi1Ni1Y1_ICSD_58826     | metal      | metal     |
| Bi1Ni1Zr1_ICSD_107121   | metal      | metal     |
| Bi1Ni1_ICSD_58820       | metal      | metal     |
| Bi1Ni1_ICSD_616868      | metal      | metal     |
| Bi1Ni9S8Te1_ICSD_107586 | metal      | metal     |
| Bi1O1_ICSD_30361        | metal      | metal     |
| Bi1O2Pr2_ICSD_419609    | metal      | metal     |
| Bi1O2Rb1_ICSD_407208    | insulator  | insulator |
| Bi1O2Tb2_ICSD_423916    | metal      | metal     |
| Bi1O2Y2_ICSD_261432     | metal      | metal     |
| Bi1O2_ICSD_52731        | metal      | metal     |
| Bi1O3Rb3_ICSD_407294    | insulator  | insulator |
| Bi1O3Rh1_ICSD_188150    | insulator  | insulator |
| Bi1O3Sc1_ICSD_171384    | insulator  | insulator |
| Bi1O3Sc1_ICSD_171385    | insulator  | insulator |
| Bi1O3Sc1_ICSD_181115    | insulator  | insulator |
| Bi1O3Sr1_ICSD_85173     | insulator  | insulator |
| Bi1O4P1_ICSD_189659     | insulator  | insulator |
| Bi1O4P1_ICSD_27469      | insulator  | insulator |
| Bi1O4Re1_ICSD_10481     | metal      | insulator |
| Bi1O4Sb1_ICSD_80821     | insulator  | insulator |
| Bi1O4Ta1_ICSD_415849    | insulator  | insulator |
| Bi1O4Ta1_ICSD_97423     | insulator  | insulator |
| Bi1O4V1_ICSD_100601     | insulator  | insulator |
| Bi1O4V1_ICSD_100733     | insulator  | insulator |
| Bi1O5P1Pb1_ICSD_419125  | insulator  | insulator |
| Bi1O5Pb1V1_ICSD_419123  | insulator  | insulator |
| Bi1O5Pb1V1_ICSD_419126  | insulator  | insulator |
| Bi1O6P1Zn2_ICSD_91234   | insulator  | insulator |
| Bi1O8P1Pb4_ICSD_50649   | insulator  | insulator |
| Bi1Os1Se1_ICSD_616892   | insulator  | insulator |
| Bi1P2S6Th1_ICSD_249461  | insulator  | insulator |
| Bi1Pb1Pd2_ICSD_56278    | metal      | metal     |
| Bi1Pb1Pd2_ICSD_58830    | metal      | metal     |
| Bi1Pb3Pt1_ICSD_58834    | metal      | metal     |
| Bi1Pd1Se1_ICSD_616956   | metal      | metal     |
| Bi1Pd1Te1_ICSD_616961   | metal      | metal     |
| Bi1Pd1Y1_ICSD_616964    | metal      | metal     |
| Bi1Pd1Yb1_ICSD_58843    | metal      | metal     |
| Bi1Pd1_ICSD_108171      | metal      | metal     |
| Bi1Pd1_ICSD_54976       | metal      | metal     |
| Bi1Pd1_ICSD_56279       | metal      | metal     |
| Bi1Pd2Y1_ICSD_58842     | metal      | metal     |
| Bi1Pd3_ICSD_58839       | metal      | metal     |
| Bi1Pr1_ICSD_187510      | metal      | metal     |
| Bi1Pr1_ICSD_187511      | metal      | metal     |
| Bi1Pr1_ICSD_58844       | metal      | metal     |

Supplementary Table 171. Five-fold cross validated predictions for the metal/insulator classification (163/598).

| system                  | calculated | predicted |
|-------------------------|------------|-----------|
| Bi1Pt1Se1_ICSD_616991   | metal      | metal     |
| Bi1Pt1Te1_ICSD_42549    | metal      | metal     |
| Bi1Pt1Yb1_ICSD_246662   | metal      | metal     |
| Bi1Pt1_ICSD_58845       | metal      | metal     |
| Bi1Pt1_ICSD_616981      | metal      | metal     |
| Bi1Pu1_ICSD_616994      | metal      | metal     |
| Bi1Rb1S2_ICSD_52735     | insulator  | insulator |
| Bi1Rb1S4Si1_ICSD_281166 | insulator  | insulator |
| Bi1Rb1_ICSD_55066       | insulator  | insulator |
| Bi1Rb3Se3_ICSD_85411    | insulator  | insulator |
| Bi1Rb3_ICSD_616996      | metal      | metal     |
| Bi1Rb3_ICSD_616997      | metal      | metal     |
| Bi1Rh1S1_ICSD_617013    | insulator  | insulator |
| Bi1Rh1Se1_ICSD_617014   | insulator  | insulator |
| Bi1Rh1Sm1_ICSD_51844    | metal      | metal     |
| Bi1Rh1_ICSD_185668      | metal      | metal     |
| Bi1Rh1_ICSD_58852       | metal      | metal     |
| Bi1S2Ti1_ICSD_172572    | insulator  | insulator |
| Bi1Sb1U1_ICSD_617069    | metal      | metal     |
| Bi1Sc1_ICSD_58856       | metal      | metal     |
| Bi1Se1_ICSD_44982       | metal      | metal     |
| Bi1Se2Ti1_ICSD_43314    | insulator  | insulator |
| Bi1Sm1_ICSD_44129       | metal      | metal     |
| Bi1Sm1_ICSD_617126      | metal      | metal     |
| Bi1Sn1_ICSD_160383      | metal      | metal     |
| Bi1Sr2_ICSD_41836       | metal      | metal     |
| Bi1Tb1_ICSD_617166      | metal      | metal     |
| Bi1Te1Th1_ICSD_617196   | metal      | metal     |
| Bi1Te1U1_ICSD_617210    | metal      | metal     |
| Bi1Te1_ICSD_100654      | metal      | insulator |
| Bi1Te1_ICSD_44984       | metal      | metal     |
| Bi1Te2Ti1_ICSD_15412    | insulator  | metal     |
| Bi1Th1_ICSD_58860       | metal      | metal     |
| Bi1Ti2_ICSD_617225      | metal      | metal     |
| Bi1Th1_ICSD_53967       | metal      | metal     |
| Bi1Tm1_ICSD_58865       | metal      | metal     |
| Bi1Tm1_ICSD_617231      | metal      | metal     |
| Bi1U1_ICSD_165127       | metal      | metal     |
| Bi1U1_ICSD_58866        | metal      | metal     |
| Bi1Y1_ICSD_58869        | metal      | metal     |
| Bi1Zr1_ICSD_409756      | metal      | metal     |
| Bi1_ICSD_187502         | metal      | metal     |
| Bi1_ICSD_189806         | metal      | metal     |
| Bi1_ICSD_409752         | metal      | metal     |
| Bi1_ICSD_43033          | metal      | metal     |
| Bi1_ICSD_51674          | metal      | metal     |
| Bi1_ICSD_51675          | metal      | metal     |
| Bi1_ICSD_52724          | metal      | metal     |
| Bi1_ICSD_52725          | metal      | metal     |
| Bi1_ICSD_616526         | metal      | metal     |

Supplementary Table 172. Five-fold cross validated predictions for the metal/insulator classification (164/598).

| system                   | calculated | predicted |
|--------------------------|------------|-----------|
| Bi1_ICSD_616528          | metal      | metal     |
| Bi24Ge2O40_ICSD_68431    | insulator  | insulator |
| Bi24O40Pb2_ICSD_75392    | insulator  | insulator |
| Bi24O40Ti2_ICSD_75389    | insulator  | insulator |
| Bi2Br1Dy1O4_ICSD_92417   | insulator  | insulator |
| Bi2Br1Er1O4_ICSD_92420   | insulator  | insulator |
| Bi2Br1Eu1O4_ICSD_92414   | insulator  | insulator |
| Bi2Br1Gd1O4_ICSD_92415   | insulator  | insulator |
| Bi2Br1Ho1O4_ICSD_92419   | insulator  | insulator |
| Bi2Br1In1Se4_ICSD_159465 | insulator  | insulator |
| Bi2Br1Lu1O4_ICSD_92423   | insulator  | insulator |
| Bi2Br1Nd1O4_ICSD_92412   | insulator  | insulator |
| Bi2Br1O4Pr1_ICSD_92411   | insulator  | insulator |
| Bi2Br1O4Tb1_ICSD_92416   | insulator  | insulator |
| Bi2Br1O4Y1_ICSD_92418    | insulator  | insulator |
| Bi2Br1O4Yb1_ICSD_92422   | metal      | insulator |
| Bi2Br8Te4_ICSD_83806     | insulator  | insulator |
| Bi2Br9Cs3_ICSD_1142      | insulator  | insulator |
| Bi2Br9Cs3_ICSD_96723     | insulator  | insulator |
| Bi2C1O5_ICSD_94740       | insulator  | insulator |
| Bi2C2Ca1O8_ICSD_94741    | insulator  | insulator |
| Bi2Ca1Mg2_ICSD_261988    | insulator  | metal     |
| Bi2Ca1Mn2_ICSD_41791     | metal      | metal     |
| Bi2Ca1O9Ta2_ICSD_20667   | metal      | insulator |
| Bi2Ca1_ICSD_659277       | metal      | metal     |
| Bi2Ca4O1_ICSD_416137     | insulator  | insulator |
| Bi2Cd1Cs2S5_ICSD_97427   | insulator  | insulator |
| Bi2Cd1Ge1O6_ICSD_82157   | insulator  | insulator |
| Bi2Ce1Ni2_ICSD_616562    | metal      | metal     |
| Bi2Cl1Dy1O4_ICSD_92404   | insulator  | insulator |
| Bi2Cl1Er1O4_ICSD_92407   | insulator  | insulator |
| Bi2Cl1Eu1O4_ICSD_92401   | insulator  | insulator |
| Bi2Cl1Gd1O4_ICSD_92402   | insulator  | insulator |
| Bi2Cl1Ho1O4_ICSD_92406   | insulator  | insulator |
| Bi2Cl1In1S4_ICSD_484     | insulator  | insulator |
| Bi2Cl1Lu1O4_ICSD_92410   | insulator  | insulator |
| Bi2Cl1Nd1O4_ICSD_92399   | insulator  | insulator |
| Bi2Cl1O4Pr1_ICSD_92398   | insulator  | insulator |
| Bi2Cl1O4Tb1_ICSD_92403   | insulator  | insulator |
| Bi2Cl1O4Y1_ICSD_92405    | insulator  | insulator |
| Bi2Cl1O4Yb1_ICSD_92409   | insulator  | metal     |
| Bi2Co1Hf6_ICSD_54566     | metal      | metal     |
| Bi2Co1Ho6_ICSD_240170    | metal      | metal     |
| Bi2Co1Mn1O6_ICSD_153856  | insulator  | insulator |
| Bi2Co1O7S1_ICSD_65135    | insulator  | insulator |
| Bi2Co1Tm6_ICSD_240171    | metal      | metal     |
| Bi2Co1Y6_ICSD_240169     | metal      | metal     |
| Bi2Cr1Fe1O6_ICSD_246426  | insulator  | insulator |
| Bi2Cs1Cu1S4_ICSD_93370   | insulator  | insulator |
| Bi2Cs1_ICSD_58771        | metal      | metal     |

Supplementary Table 173. Five-fold cross validated predictions for the metal/insulator classification (165/598).

| system                   | calculated | predicted |
|--------------------------|------------|-----------|
| Bi2Cs2Pd1_ICSD_658703    | insulator  | insulator |
| Bi2Cs2Pt1_ICSD_658701    | insulator  | insulator |
| Bi2Cs3I9_ICSD_1448       | insulator  | insulator |
| Bi2Cs3I9_ICSD_411633     | insulator  | insulator |
| Bi2Cu1K1S4_ICSD_91297    | insulator  | insulator |
| Bi2Cu1O12Se4_ICSD_66826  | insulator  | insulator |
| Bi2Cu1O4_ICSD_12104      | insulator  | insulator |
| Bi2Cu1O4_ICSD_68812      | insulator  | insulator |
| Bi2Cu1U1_ICSD_656844     | metal      | metal     |
| Bi2Cu1Zr6_ICSD_182405    | metal      | metal     |
| Bi2Dy1I1O4_ICSD_92431    | insulator  | insulator |
| Bi2Dy1Ni2_ICSD_616635    | metal      | metal     |
| Bi2Er1I1O4_ICSD_89618    | insulator  | insulator |
| Bi2Er6Mn1_ICSD_159231    | metal      | metal     |
| Bi2Eu1I1O4_ICSD_92428    | insulator  | insulator |
| Bi2Eu1Pd2_ICSD_604364    | metal      | metal     |
| Bi2Eu1S4_ICSD_600801     | metal      | insulator |
| Bi2Eu1Se4_ICSD_600805    | insulator  | metal     |
| Bi2Eu1_ICSD_659278       | metal      | metal     |
| Bi2Fe1Ho6_ICSD_182408    | metal      | metal     |
| Bi2Fe1Ho6_ICSD_96253     | metal      | metal     |
| Bi2Fe1O6Ti1_ICSD_162263  | metal      | insulator |
| Bi2Fe1Tb6_ICSD_152647    | metal      | metal     |
| Bi2Fe1Tb6_ICSD_152648    | metal      | metal     |
| Bi2Fe4O9_ICSD_26808      | insulator  | insulator |
| Bi2Ga2In4S12_ICSD_410032 | insulator  | insulator |
| Bi2Ga4O9_ICSD_248245     | insulator  | insulator |
| Bi2Ga4S8_ICSD_408441     | insulator  | insulator |
| Bi2Ga4Se8_ICSD_408442    | insulator  | insulator |
| Bi2Gd1I1O4_ICSD_92429    | metal      | insulator |
| Bi2Ge1O5_ICSD_62488      | insulator  | insulator |
| Bi2Ge1O5_ICSD_65522      | insulator  | insulator |
| Bi2Ge1O5_ICSD_94334      | insulator  | insulator |
| Bi2Ge1Te4_ICSD_658633    | insulator  | insulator |
| Bi2Ge3O9_ICSD_100277     | insulator  | insulator |
| Bi2Ge3Te6_ICSD_16207     | metal      | insulator |
| Bi2H16Na6O14_ICSD_412583 | insulator  | insulator |
| Bi2Hf1_ICSD_616683       | metal      | metal     |
| Bi2Hg1S4_ICSD_14189      | insulator  | insulator |
| Bi2Ho1I1O4_ICSD_92433    | insulator  | insulator |
| Bi2Ho5Pd1_ICSD_180046    | metal      | metal     |
| Bi2Ho6Mn1_ICSD_159211    | metal      | metal     |
| Bi2Ho6Rh1_ICSD_180044    | metal      | metal     |
| Bi2I1La1O4_ICSD_92424    | insulator  | insulator |
| Bi2I1Lu1O4_ICSD_92437    | insulator  | insulator |
| Bi2I1Nd1O4_ICSD_92426    | insulator  | insulator |
| Bi2I1O4Pr1_ICSD_92425    | insulator  | insulator |
| Bi2I1O4Tb1_ICSD_92430    | insulator  | insulator |
| Bi2I1O4Y1_ICSD_92432     | insulator  | insulator |
| Bi2I1O4Yb1_ICSD_92436    | metal      | metal     |

Supplementary Table 174. Five-fold cross validated predictions for the metal/insulator classification (166/598).

| system                  | calculated | predicted |
|-------------------------|------------|-----------|
| Bi2I1Te1.ICSD.153858    | metal      | insulator |
| Bi2In4S9.ICSD.2839      | insulator  | insulator |
| Bi2Ir1.ICSD.616739      | metal      | metal     |
| Bi2Ir2O7.ICSD.161103    | metal      | metal     |
| Bi2K1.ICSD.55068        | metal      | metal     |
| Bi2K3O12P3.ICSD.409582  | insulator  | insulator |
| Bi2K4O5.ICSD.408000     | insulator  | insulator |
| Bi2La1Li1.ICSD.415728   | metal      | metal     |
| Bi2La1Li3.ICSD.616769   | metal      | metal     |
| Bi2La1Ni2.ICSD.616770   | metal      | metal     |
| Bi2Li3Y1.ICSD.616795    | metal      | metal     |
| Bi2Li8O10Pd1.ICSD.73000 | insulator  | insulator |
| Bi2Mg1O6.ICSD.50005     | metal      | insulator |
| Bi2Mg2Sr1.ICSD.616807   | insulator  | insulator |
| Bi2Mg2Yb1.ICSD.261990   | metal      | metal     |
| Bi2Mg3.ICSD.659569      | metal      | metal     |
| Bi2Mn1Ni1O6.ICSD.159285 | insulator  | insulator |
| Bi2Mn1Ti4.ICSD.150145   | metal      | metal     |
| Bi2Mo1O6.ICSD.14266     | insulator  | insulator |
| Bi2Mo1O6.ICSD.17070     | insulator  | insulator |
| Bi2Mo1O6.ICSD.37251     | insulator  | insulator |
| Bi2Na1O11Sb3.ICSD.79859 | insulator  | insulator |
| Bi2Nb2O9Pb1.ICSD.20668  | insulator  | insulator |
| Bi2Nd1Ni2.ICSD.616866   | metal      | metal     |
| Bi2Ni1Ti4.ICSD.150148   | metal      | metal     |
| Bi2Ni1U1.ICSD.656843    | metal      | metal     |
| Bi2Ni2Pr1.ICSD.616870   | metal      | metal     |
| Bi2Ni2Tb1.ICSD.616881   | metal      | metal     |
| Bi2Ni3S2.ICSD.159360    | metal      | metal     |
| Bi2Ni3S2.ICSD.159364    | metal      | metal     |
| Bi2Ni3Se2.ICSD.616879   | metal      | metal     |
| Bi2O10Pb2V2.ICSD.60577  | insulator  | insulator |
| Bi2O10Te2W1.ICSD.78917  | insulator  | insulator |
| Bi2O11Ti4.ICSD.79769    | insulator  | insulator |
| Bi2O13P4.ICSD.65133     | insulator  | insulator |
| Bi2O2S1.ICSD.29451      | insulator  | insulator |
| Bi2O2Se1.ICSD.2903      | metal      | insulator |
| Bi2O2Se1.ICSD.411143    | insulator  | metal     |
| Bi2O3.ICSD.168807       | metal      | insulator |
| Bi2O3.ICSD.168808       | insulator  | insulator |
| Bi2O3.ICSD.168810       | insulator  | insulator |
| Bi2O3.ICSD.168811       | insulator  | insulator |
| Bi2O3.ICSD.168813       | insulator  | insulator |
| Bi2O3.ICSD.168814       | insulator  | insulator |
| Bi2O3.ICSD.168815       | insulator  | insulator |
| Bi2O3.ICSD.169686       | insulator  | insulator |
| Bi2O3.ICSD.186365       | insulator  | insulator |
| Bi2O3.ICSD.261777       | insulator  | insulator |
| Bi2O3.ICSD.27152        | insulator  | insulator |
| Bi2O3.ICSD.37367        | metal      | metal     |

Supplementary Table 175. Five-fold cross validated predictions for the metal/insulator classification (167/598).

| system                  | calculated | predicted |
|-------------------------|------------|-----------|
| Bi2O3.ICSD.421855       | insulator  | insulator |
| Bi2O3.ICSD.616890       | insulator  | insulator |
| Bi2O3.ICSD.62979        | insulator  | insulator |
| Bi2O4Pd1.ICSD.200145    | insulator  | insulator |
| Bi2O4Pd1.ICSD.9622      | insulator  | insulator |
| Bi2O4Sr1.ICSD.80668     | insulator  | insulator |
| Bi2O4.ICSD.79500        | insulator  | insulator |
| Bi2O5Se1.ICSD.409518    | insulator  | insulator |
| Bi2O5Si1.ICSD.30995     | insulator  | insulator |
| Bi2O5Sr2.ICSD.86415     | insulator  | insulator |
| Bi2O5Te1.ICSD.36446     | insulator  | insulator |
| Bi2O6Te1.ICSD.6239      | insulator  | insulator |
| Bi2O6Ti1Zn1.ICSD.162767 | insulator  | insulator |
| Bi2O6Ti1Zn1.ICSD.162768 | insulator  | insulator |
| Bi2O6Ti1Zn1.ICSD.186800 | metal      | insulator |
| Bi2O6Ti1Zn1.ICSD.186802 | insulator  | insulator |
| Bi2O6Ti1Zn1.ICSD.186803 | insulator  | insulator |
| Bi2O6U1.ICSD.1805       | insulator  | insulator |
| Bi2O6U1.ICSD.1806       | insulator  | insulator |
| Bi2O6W1.ICSD.23584      | insulator  | insulator |
| Bi2O6W1.ICSD.290469     | metal      | insulator |
| Bi2O6W1.ICSD.66579      | insulator  | insulator |
| Bi2O6W1.ICSD.67647      | insulator  | insulator |
| Bi2O7Os2.ICSD.161105    | metal      | metal     |
| Bi2O7Pt2.ICSD.161104    | insulator  | metal     |
| Bi2O7Rh2.ICSD.161099    | metal      | metal     |
| Bi2O7Ru2.ICSD.166567    | metal      | metal     |
| Bi2O7Sn2.ICSD.50311     | insulator  | metal     |
| Bi2O7Ti2.ICSD.180394    | insulator  | insulator |
| Bi2O9Si3.ICSD.155234    | insulator  | insulator |
| Bi2O9W2.ICSD.88428      | insulator  | insulator |
| Bi2Pb1S4.ICSD.31859     | insulator  | insulator |
| Bi2Pb1Te4.ICSD.616936   | insulator  | insulator |
| Bi2Pb2Se5.ICSD.30372    | insulator  | insulator |
| Bi2Pb2Te5.ICSD.42708    | metal      | insulator |
| Bi2Pb3S6.ICSD.92981     | insulator  | insulator |
| Bi2Pd1.ICSD.56280       | metal      | metal     |
| Bi2Pd1.ICSD.616946      | metal      | metal     |
| Bi2Pd2Sr1.ICSD.416300   | metal      | metal     |
| Bi2Pd2Sr1.ICSD.604338   | metal      | metal     |
| Bi2Pd3S2.ICSD.159362    | metal      | metal     |
| Bi2Pd3S2.ICSD.159366    | metal      | metal     |
| Bi2Pd3S2.ICSD.616954    | metal      | metal     |
| Bi2Pd3Se2.ICSD.261458   | metal      | metal     |
| Bi2Pd5.ICSD.58840       | metal      | metal     |
| Bi2Pt1.ICSD.58846       | metal      | metal     |
| Bi2Pt1.ICSD.58847       | metal      | metal     |
| Bi2Pt1.ICSD.616982      | metal      | metal     |
| Bi2Rb1.ICSD.58850       | metal      | metal     |
| Bi2Rh1.ICSD.43503       | metal      | metal     |

Supplementary Table 176. Five-fold cross validated predictions for the metal/insulator classification (168/598).

| system                   | calculated | predicted |
|--------------------------|------------|-----------|
| Bi2Rh3S2.ICSD.420725     | metal      | metal     |
| Bi2Rh3Si2.ICSD.617015    | metal      | metal     |
| Bi2S1Te2.ICSD.26720      | insulator  | metal     |
| Bi2S3.ICSD.617021        | insulator  | insulator |
| Bi2S4Yb1.ICSD.600812     | insulator  | insulator |
| Bi2Se1Te2.ICSD.43512     | metal      | insulator |
| Bi2Se2Te1.ICSD.54838     | insulator  | insulator |
| Bi2Se2.ICSD.20458        | metal      | insulator |
| Bi2Se3.ICSD.171571       | insulator  | insulator |
| Bi2Se3.ICSD.617083       | insulator  | metal     |
| Bi2Se3.ICSD.617096       | insulator  | insulator |
| Bi2Te3.ICSD.20289        | metal      | insulator |
| Bi2Te3.ICSD.617187       | insulator  | metal     |
| Bi2Th1.ICSD.617224       | metal      | metal     |
| Bi2Ti1.ICSD.617229       | metal      | metal     |
| Bi2U1.ICSD.617241        | metal      | metal     |
| Bi2Yb1.ICSD.617251       | metal      | metal     |
| Bi2Zr1.ICSD.42880        | metal      | metal     |
| Bi3Br1La5.ICSD.95241     | metal      | metal     |
| Bi3Br1Se4.ICSD.411096    | insulator  | insulator |
| Bi3Ce4.ICSD.616553       | metal      | metal     |
| Bi3Cl5O10Te4.ICSD.168978 | insulator  | insulator |
| Bi3Co1.ICSD.236383       | metal      | metal     |
| Bi3Cs1Se5.ICSD.171610    | insulator  | insulator |
| Bi3Er5.ICSD.107266       | metal      | metal     |
| Bi3Eu4.ICSD.616649       | metal      | metal     |
| Bi3Eu5.ICSD.173031       | metal      | metal     |
| Bi3F6N1.ICSD.79395       | insulator  | insulator |
| Bi3Fe1Mo2O12.ICSD.45     | insulator  | insulator |
| Bi3Gd4.ICSD.616662       | metal      | metal     |
| Bi3Ho5.ICSD.107265       | metal      | metal     |
| Bi3In4Pb1.ICSD.616725    | metal      | metal     |
| Bi3In5.ICSD.1246         | metal      | metal     |
| Bi3La4.ICSD.616759       | metal      | metal     |
| Bi3Mn4N1O15.ICSD.260393  | insulator  | insulator |
| Bi3Na1O10V2.ICSD.88455   | insulator  | insulator |
| Bi3Nd4.ICSD.616855       | metal      | metal     |
| Bi3Nd4.ICSD.616860       | metal      | metal     |
| Bi3Ni1.ICSD.391336       | metal      | metal     |
| Bi3O11Pt3.ICSD.108966    | metal      | insulator |
| Bi3O11Ru3.ICSD.4194      | metal      | insulator |
| Bi3O7Sb1.ICSD.51779      | insulator  | insulator |
| Bi3O8Re1.ICSD.185903     | insulator  | insulator |
| Bi3O8Re1.ICSD.185904     | insulator  | insulator |
| Bi3Pr4.ICSD.616969       | metal      | metal     |
| Bi3Rb1S5.ICSD.654071     | metal      | insulator |
| Bi3Rh1.ICSD.58853        | metal      | metal     |
| Bi3S1Te2.ICSD.107587     | metal      | insulator |
| Bi3Sc5.ICSD.107590       | metal      | metal     |
| Bi3Se4.ICSD.20386        | metal      | insulator |

Supplementary Table 177. Five-fold cross validated predictions for the metal/insulator classification (169/598).

| system                   | calculated | predicted |
|--------------------------|------------|-----------|
| Bi3Sm4.ICSD.617132       | metal      | metal     |
| Bi3Sr1.ICSD.617156       | metal      | metal     |
| Bi3Sr2.ICSD.164987       | metal      | metal     |
| Bi3Sr4.ICSD.96944        | metal      | metal     |
| Bi3Sr5.ICSD.617154       | metal      | metal     |
| Bi3Tb4.ICSD.617161       | metal      | metal     |
| Bi3Tb5.ICSD.617164       | metal      | metal     |
| Bi3Th5.ICSD.617223       | metal      | metal     |
| Bi3Yb4.ICSD.617248       | metal      | metal     |
| Bi3Yb4.ICSD.617255       | metal      | metal     |
| Bi4Br2O5.ICSD.412591     | insulator  | insulator |
| Bi4Br2O9Te2.ICSD.79508   | insulator  | insulator |
| Bi4Ce3Pd3.ICSD.419162    | insulator  | metal     |
| Bi4Ce3Pt3.ICSD.616565    | insulator  | metal     |
| Bi4Cl14Se4.ICSD.410910   | insulator  | insulator |
| Bi4Cl16Te14.ICSD.391157  | insulator  | insulator |
| Bi4Cl1O8Ta1.ICSD.59601   | insulator  | insulator |
| Bi4Cu3La3.ICSD.167250    | insulator  | metal     |
| Bi4Cu3O14V2.ICSD.75222   | metal      | insulator |
| Bi4Cu4Mn3.ICSD.616588    | metal      | metal     |
| Bi4Ge1Te7.ICSD.42891     | insulator  | insulator |
| Bi4Ge3O12.ICSD.108872    | insulator  | insulator |
| Bi4I2O5.ICSD.412590      | insulator  | insulator |
| Bi4I2Ru1.ICSD.406949     | insulator  | insulator |
| Bi4La3Pt3.ICSD.616774    | metal      | insulator |
| Bi4Li1Nb3O14.ICSD.391261 | insulator  | insulator |
| Bi4Mn5Ni2.ICSD.58812     | metal      | metal     |
| Bi4O11Ta2.ICSD.50601     | insulator  | insulator |
| Bi4O12Si3.ICSD.69430     | insulator  | insulator |
| Bi4O12Ti3.ICSD.24735     | metal      | insulator |
| Bi4O7.ICSD.51778         | insulator  | insulator |
| Bi4Pb1Te7.ICSD.250249    | insulator  | insulator |
| Bi4Rh1.ICSD.58854        | metal      | metal     |
| Bi4Se3.ICSD.617074       | metal      | metal     |
| Bi4Sn1Te7.ICSD.236253    | insulator  | insulator |
| Bi4Te3.ICSD.30526        | insulator  | metal     |
| Bi4Th3.ICSD.58862        | metal      | metal     |
| Bi4U3.ICSD.58868         | metal      | metal     |
| Bi5Cl12Ga3.ICSD.414089   | insulator  | insulator |
| Bi5Cu4S10.ICSD.1842      | metal      | metal     |
| Bi5I1O7.ICSD.30978       | insulator  | insulator |
| Bi5La3Mg1.ICSD.415727    | metal      | metal     |
| Bi5La3Sc1.ICSD.416609    | metal      | metal     |
| Bi5Mn1Pr3.ICSD.173359    | metal      | metal     |
| Bi6Cu2Pb2S12.ICSD.160417 | insulator  | insulator |
| Bi6In2Sr5.ICSD.415576    | metal      | metal     |
| Bi6Se13Sr4.ICSD.62782    | insulator  | insulator |
| Bi7Cs3Se12.ICSD.61785    | insulator  | insulator |
| Bi7Cu4S12.ICSD.64709     | metal      | insulator |
| Bi7F11O5.ICSD.167074     | insulator  | insulator |

Supplementary Table 178. Five-fold cross validated predictions for the metal/insulator classification (170/598).

| system                    | calculated | predicted |
|---------------------------|------------|-----------|
| Bi7O18Ta3_ICSD_280093     | insulator  | insulator |
| Bi8K2Se13_ICSD_72976      | insulator  | insulator |
| Bi9Ca9Cd4_ICSD_58760      | metal      | metal     |
| Bi9Ca9Zn4_ICSD_8158       | metal      | metal     |
| Bi9I3Rh2_ICSD_411136      | insulator  | insulator |
| Bi9Mn4Yb9_ICSD_166888     | metal      | metal     |
| Br1.6Cl0.4Sr1_ICSD_35052  | insulator  | insulator |
| Br10Co1Er6_ICSD_424427    | insulator  | insulator |
| Br10Co1Tb6_ICSD_424433    | metal      | insulator |
| Br10Co1Y6_ICSD_424465     | insulator  | insulator |
| Br10Gd6Ir1_ICSD_424456    | insulator  | insulator |
| Br10Ir1Tb6_ICSD_424434    | insulator  | metal     |
| Br10Ni1Tb6_ICSD_424435    | insulator  | insulator |
| Br10Ni1Y6_ICSD_424466     | insulator  | insulator |
| Br10O1Ta2Te4_ICSD_401906  | insulator  | insulator |
| Br10O4Pb9_ICSD_35381      | insulator  | insulator |
| Br10Pd1Y6_ICSD_424467     | insulator  | insulator |
| Br10Rb1Re3_ICSD_33911     | insulator  | insulator |
| Br10Re2Te6_ICSD_410190    | insulator  | insulator |
| Br10Ru1Tb6_ICSD_424436    | metal      | insulator |
| Br11Cs1Nb4_ICSD_26077     | insulator  | insulator |
| Br12C1Sc7_ICSD_61266      | metal      | insulator |
| Br12Co1Ho7_ICSD_424451    | insulator  | metal     |
| Br12Co1Sc7_ICSD_424474    | insulator  | insulator |
| Br12Fe1Tb7_ICSD_424440    | metal      | insulator |
| Br12Os1Se2_ICSD_182315    | insulator  | insulator |
| Br12Ta2Te4_ICSD_401905    | insulator  | insulator |
| Br12Zr6_ICSD_41540        | metal      | insulator |
| Br14Cd1W6_ICSD_80887      | insulator  | insulator |
| Br14Mo6Pb1_ICSD_36573     | insulator  | insulator |
| Br14Rb2W6_ICSD_390028     | insulator  | insulator |
| Br14Ta6_ICSD_402031       | insulator  | insulator |
| Br15Co1Th6_ICSD_33926     | insulator  | metal     |
| Br15Fe1Th6_ICSD_33925     | metal      | insulator |
| Br16Re4Te8_ICSD_78924     | insulator  | insulator |
| Br17Nb6Rb3S1_ICSD_400496  | insulator  | insulator |
| Br18Cs1Er1Ta6_ICSD_77666  | insulator  | insulator |
| Br18K4Nb6_ICSD_49687      | insulator  | insulator |
| Br18Nb6Ti4_ICSD_402033    | insulator  | insulator |
| Br1C1C11F1H3_ICSD_424851  | insulator  | insulator |
| Br1C1Cu1H2N2_ICSD_420807  | insulator  | insulator |
| Br1C1Gd2_ICSD_40561       | metal      | metal     |
| Br1C1K1N2O4_ICSD_42826    | insulator  | insulator |
| Br1C1Pr2_ICSD_420348      | metal      | metal     |
| Br1C2H8N1_ICSD_110459     | insulator  | insulator |
| Br1C2H8N1_ICSD_400651     | insulator  | insulator |
| Br1C2N2Ni1Rb1_ICSD_380470 | insulator  | insulator |
| Br1C3H10N1_ICSD_171150    | insulator  | insulator |
| Br1C4N3_ICSD_246789       | insulator  | insulator |
| Br1C5Mn1O5_ICSD_281349    | insulator  | insulator |

Supplementary Table 179. Five-fold cross validated predictions for the metal/insulator classification (171/598).

| system                    | calculated | predicted |
|---------------------------|------------|-----------|
| Br1C5O5Re1_ICSD_66697     | insulator  | insulator |
| Br1C5O5Tc1_ICSD_167773    | insulator  | insulator |
| Br1C8H20Li1O4_ICSD_151064 | insulator  | insulator |
| Br1Ca1H1_ICSD_25542       | insulator  | insulator |
| Br1Ca2H3_ICSD_420928      | insulator  | insulator |
| Br1Ca2N1_ICSD_153105      | insulator  | insulator |
| Br1Cd1S2Sb1_ICSD_171723   | insulator  | insulator |
| Br1Cd2P3_ICSD_100817      | insulator  | insulator |
| Br1Cd2P3_ICSD_100880      | insulator  | insulator |
| Br1Ce2S5Sb1_ICSD_51484    | insulator  | insulator |
| Br1Ce3S8Si2_ICSD_39052    | insulator  | insulator |
| Br1Cl14P3_ICSD_80214      | insulator  | insulator |
| Br1Cl1_ICSD_424850        | insulator  | insulator |
| Br1Cr1O1_ICSD_27092       | insulator  | insulator |
| Br1Cr1S1_ICSD_69659       | insulator  | insulator |
| Br1Cr2O4P1_ICSD_410823    | insulator  | insulator |
| Br1Cs1F6_ICSD_65712       | insulator  | insulator |
| Br1Cs1I2_ICSD_23120       | metal      | insulator |
| Br1Cs1O3_ICSD_74769       | insulator  | insulator |
| Br1Cs1O4_ICSD_201158      | insulator  | insulator |
| Br1Cs1_ICSD_53834         | insulator  | insulator |
| Br1Cs1_ICSD_61516         | insulator  | insulator |
| Br1Cu1H6N2_ICSD_170947    | insulator  | insulator |
| Br1Cu1Hg1S1_ICSD_412308   | insulator  | insulator |
| Br1Cu1Hg1Se1_ICSD_411771  | insulator  | insulator |
| Br1Cu1La1Nb2O7_ICSD_88033 | metal      | insulator |
| Br1Cu1N4S4_ICSD_33515     | insulator  | insulator |
| Br1Cu1O2Sr2_ICSD_65470    | insulator  | insulator |
| Br1Cu1Se3_ICSD_71309      | insulator  | insulator |
| Br1Cu1Te2_ICSD_67252      | insulator  | insulator |
| Br1Cu1_ICSD_30091         | insulator  | insulator |
| Br1Cu1_ICSD_78275         | insulator  | insulator |
| Br1Cu1_ICSD_78278         | insulator  | insulator |
| Br1Cu1_ICSD_78280         | insulator  | insulator |
| Br1Cu6P1S5_ICSD_89450     | insulator  | insulator |
| Br1Dy1Mo1O4_ICSD_425268   | insulator  | insulator |
| Br1Dy1S1_ICSD_79106       | insulator  | insulator |
| Br1Er1Mo1O4_ICSD_425270   | insulator  | insulator |
| Br1Eu1I1_ICSD_59885       | insulator  | insulator |
| Br1Eu2P1_ICSD_202067      | insulator  | insulator |
| Br1Eu3O4_ICSD_34605       | insulator  | insulator |
| Br1F1Pb1_ICSD_155011      | insulator  | insulator |
| Br1F1Sr1_ICSD_159279      | insulator  | insulator |
| Br1F3Rb1Sb1_ICSD_200109   | insulator  | insulator |
| Br1F3_ICSD_39441          | insulator  | insulator |
| Br1F4K1_ICSD_16633        | insulator  | insulator |
| Br1F4K1_ICSD_16700        | insulator  | insulator |
| Br1F4N1O2_ICSD_412427     | insulator  | insulator |
| Br1F4Rb1_ICSD_65713       | insulator  | insulator |
| Br1F5O3Te1_ICSD_50200     | insulator  | insulator |

Supplementary Table 180. Five-fold cross validated predictions for the metal/insulator classification (172/598).

| system                       | calculated | predicted |
|------------------------------|------------|-----------|
| Br1F5Sn3.ICSD_1383           | insulator  | insulator |
| Br1F5.ICSD_31690             | insulator  | insulator |
| Br1F6O2Sb1.ICSD_173608       | insulator  | insulator |
| Br1F8Sb1.ICSD_9886           | insulator  | insulator |
| Br1Fe1O3Sr2.ICSD_93509       | insulator  | insulator |
| Br1Gd1Mo1O4.ICSD_425266      | insulator  | insulator |
| Br1Gd1O1.ICSD_41071          | insulator  | insulator |
| Br1Gd3S8Si2.ICSD_411995      | insulator  | insulator |
| Br1H1Hg1O4.ICSD_29039        | insulator  | insulator |
| Br1H1K2O1.ICSD_78734         | insulator  | insulator |
| Br1H1O1Pb1.ICSD_404573       | insulator  | insulator |
| Br1H1O1Rb2.ICSD_78735        | insulator  | insulator |
| Br1H1O1Sr1.ICSD_407720       | insulator  | insulator |
| Br1H1Sr1.ICSD_25543          | insulator  | insulator |
| Br1H1.ICSD_28842             | insulator  | insulator |
| Br1H1.ICSD_63670             | metal      | metal     |
| Br1H2Li1O1.ICSD_391154       | insulator  | insulator |
| Br1H2O6Rb1Se2Zn1.ICSD_409916 | insulator  | insulator |
| Br1H3Li4O3.ICSD_412730       | insulator  | insulator |
| Br1H4N1O4.ICSD_165085        | insulator  | insulator |
| Br1H4N1.ICSD_27724           | insulator  | insulator |
| Br1H4N1.ICSD_43300           | insulator  | insulator |
| Br1H4Na1O2.ICSD_8125         | insulator  | insulator |
| Br1H4P1.ICSD_23691           | insulator  | insulator |
| Br1H5O2.ICSD_34105           | insulator  | insulator |
| Br1H6Li1O7.ICSD_73706        | insulator  | insulator |
| Br1H6Na1O5.ICSD_74654        | insulator  | insulator |
| Br1Hf1N1.ICSD_51773          | insulator  | insulator |
| Br1Hf1N1.ICSD_95720          | insulator  | insulator |
| Br1Hg1I1.ICSD_109010         | insulator  | insulator |
| Br1Hg2N1.ICSD_24706          | insulator  | insulator |
| Br1Hg2P3.ICSD_74770          | insulator  | insulator |
| Br1Hg3I1Te2.ICSD_99125       | insulator  | insulator |
| Br1Ho1Mo1O4.ICSD_425269      | insulator  | insulator |
| Br1I1Pb1.ICSD_22138          | metal      | insulator |
| Br1In1O1.ICSD_24059          | insulator  | insulator |
| Br1In1O3Te1.ICSD_420301      | insulator  | insulator |
| Br1In1S4Sb2.ICSD_159467      | insulator  | insulator |
| Br1In1Sb2Se4.ICSD_159466     | insulator  | insulator |
| Br1In1Te1.ICSD_100705        | insulator  | insulator |
| Br1In1.ICSD_62239            | insulator  | insulator |
| Br1In3La5.ICSD_409631        | metal      | metal     |
| Br1In5S5.ICSD_414219         | insulator  | insulator |
| Br1In5Se5.ICSD_414218        | insulator  | insulator |
| Br1K1O3.ICSD_74767           | insulator  | insulator |
| Br1K1O4.ICSD_15222           | insulator  | insulator |
| Br1K1.ICSD_290558            | insulator  | insulator |
| Br1K1.ICSD_52243             | insulator  | insulator |
| Br1K3Mo2O7.ICSD_2163         | insulator  | insulator |
| Br1K3O1.ICSD_33920           | insulator  | insulator |

Supplementary Table 181. Five-fold cross validated predictions for the metal/insulator classification (173/598).

| system                   | calculated | predicted |
|--------------------------|------------|-----------|
| Br1La1O1.ICSD_24612      | insulator  | insulator |
| Br1La1O7Pb6.ICSD_249390  | insulator  | insulator |
| Br1La1.ICSD_23354        | metal      | metal     |
| Br1La3S8Si2.ICSD_411996  | insulator  | insulator |
| Br1La5Sb3.ICSD_50725     | metal      | metal     |
| Br1La5Sn3.ICSD_95239     | metal      | metal     |
| Br1Li10N3.ICSD_78819     | insulator  | insulator |
| Br1Li1.ICSD_44274        | insulator  | insulator |
| Br1Li3O1.ICSD_67265      | insulator  | insulator |
| Br1Li6O5P1.ICSD_421480   | insulator  | insulator |
| Br1Lu1O1.ICSD_249338     | insulator  | insulator |
| Br1Lu1S1.ICSD_6082       | insulator  | insulator |
| Br1Mn1S2Sb1.ICSD_172782  | insulator  | insulator |
| Br1Mn1Sb1Se2.ICSD_172784 | insulator  | insulator |
| Br1Mo1Nd1O4.ICSD_425264  | insulator  | insulator |
| Br1Mo1O4Pr1.ICSD_425263  | insulator  | insulator |
| Br1Mo1O4Tb1.ICSD_425267  | insulator  | insulator |
| Br1Mo1S1.ICSD_163308     | insulator  | insulator |
| Br1Mo1Te4.ICSD_82245     | insulator  | insulator |
| Br1N1O3.ICSD_407765      | insulator  | insulator |
| Br1N1Sr2.ICSD_172600     | insulator  | insulator |
| Br1N1Ti1.ICSD_27395      | insulator  | insulator |
| Br1N1Zn2.ICSD_425736     | insulator  | insulator |
| Br1N1Zr1.ICSD_25507      | insulator  | insulator |
| Br1N1Zr1.ICSD_27393      | insulator  | insulator |
| Br1N1Zr1.ICSD_87797      | insulator  | insulator |
| Br1Na1O3.ICSD_1302       | insulator  | insulator |
| Br1Na1.ICSD_53822        | insulator  | insulator |
| Br1Nd1O3Te1.ICSD_92319   | insulator  | insulator |
| Br1Nd1O5Te2.ICSD_83400   | metal      | insulator |
| Br1O12P3Sr5.ICSD_87102   | insulator  | insulator |
| Br1O1Pr1.ICSD_262128     | insulator  | insulator |
| Br1O1Rb3.ICSD_77196      | insulator  | insulator |
| Br1O1Sc1.ICSD_170774     | insulator  | insulator |
| Br1O1Ti1.ICSD_155650     | insulator  | insulator |
| Br1O1Ti1.ICSD_240499     | metal      | insulator |
| Br1O1V1.ICSD_27010       | insulator  | insulator |
| Br1O1Y1.ICSD_0           | insulator  | insulator |
| Br1O1Yb1.ICSD_28532      | metal      | insulator |
| Br1O3Rb1.ICSD_74768      | insulator  | insulator |
| Br1O3Ti1.ICSD_76966      | insulator  | insulator |
| Br1O4Ti1.ICSD_65660      | insulator  | insulator |
| Br1O4Y3.ICSD_419384      | insulator  | insulator |
| Br1Rb1.ICSD_18017        | insulator  | insulator |
| Br1Rb1.ICSD_61522        | insulator  | insulator |
| Br1S1Sb1.ICSD_40918      | insulator  | insulator |
| Br1S1Sb1.ICSD_88585      | insulator  | insulator |
| Br1S1Sb1.ICSD_88586      | insulator  | insulator |
| Br1S1Sb1.ICSD_88587      | insulator  | insulator |
| Br1Se2Ti5.ICSD_75960     | insulator  | insulator |

Supplementary Table 182. Five-fold cross validated predictions for the metal/insulator classification (174/598).

| system                          | calculated | predicted |
|---------------------------------|------------|-----------|
| Br1Tb1.ICSD_23353               | metal      | metal     |
| Br1Te2.ICSD_426519              | insulator  | insulator |
| Br1Tl1.ICSD_109144              | insulator  | insulator |
| Br1Tl1.ICSD_61519               | insulator  | insulator |
| Br1Tl1.ICSD_61532               | insulator  | insulator |
| Br1Zr1.ICSD_1168                | metal      | metal     |
| Br1.ICSD_168172                 | metal      | metal     |
| Br1.ICSD_168174                 | metal      | metal     |
| Br1.ICSD_168175                 | metal      | metal     |
| Br2C12H36P4Tc1.ICSD_166912      | metal      | insulator |
| Br2C1Gd2.ICSD_47226             | insulator  | metal     |
| Br2C1O3Pb2.ICSD_29114           | insulator  | insulator |
| Br2C1Se4.ICSD_38387             | insulator  | insulator |
| Br2C2Gd2.ICSD_47225             | metal      | metal     |
| Br2C2H6N2S1.ICSD_408001         | insulator  | insulator |
| Br2C2H6S1.ICSD_407035           | insulator  | insulator |
| Br2C2Y2.ICSD_78871              | metal      | metal     |
| Br2C4Cd1H8N8.ICSD_405833        | insulator  | insulator |
| Br2C4H11N1.ICSD_240878          | insulator  | insulator |
| Br2C4K2N4Pt1.ICSD_413705        | insulator  | insulator |
| Br2C4Mg2Na6O12.ICSD_27791       | insulator  | insulator |
| Br2C4N4Pt1Rb2.ICSD_852          | insulator  | insulator |
| Br2C6Ca1H24O6.ICSD_174396       | insulator  | insulator |
| Br2C6H18N4S4.ICSD_151023        | insulator  | insulator |
| Br2Ca1H12O6.ICSD_1141           | insulator  | insulator |
| Br2Ca1.ICSD_246715              | insulator  | insulator |
| Br2Ca1.ICSD_56766               | insulator  | insulator |
| Br2Ca2Cu1O2.ICSD_1028           | metal      | metal     |
| Br2Ca3Si1.ICSD_89537            | metal      | metal     |
| Br2Ca3Si1.ICSD_89538            | insulator  | metal     |
| Br2Ca3Si1.ICSD_89539            | metal      | metal     |
| Br2Ca3Si1.ICSD_89540            | metal      | metal     |
| Br2Ca3Si1.ICSD_89542            | metal      | metal     |
| Br2Ca3Si1.ICSD_89543            | metal      | metal     |
| Br2Ca3Si1.ICSD_89544            | metal      | metal     |
| Br2Cd1Sb2Se3.ICSD_159464        | insulator  | insulator |
| Br2Cd1.ICSD_25782               | insulator  | insulator |
| Br2Cd1.ICSD_31536               | insulator  | insulator |
| Br2Cd1.ICSD_52367               | insulator  | insulator |
| Br2Cd2Hg2S2.ICSD_185392         | metal      | insulator |
| Br2Ce1S2Sb1.ICSD_93664          | metal      | insulator |
| Br2Cl2Cr1Cs1H18N6O8.ICSD_280499 | insulator  | insulator |
| Br2Cl2Cu1Rb2.ICSD_15147         | insulator  | insulator |
| Br2Cl6I3Sb1.ICSD_26404          | insulator  | insulator |
| Br2Co1H12O12.ICSD_68733         | metal      | insulator |
| Br2Co1H12O14.ICSD_73397         | insulator  | insulator |
| Br2Co1H12O6.ICSD_40634          | insulator  | insulator |
| Br2Co1H4O2.ICSD_22085           | insulator  | insulator |
| Br2Co1O2Sr2.ICSD_151789         | metal      | metal     |
| Br2Co1O3Sb2.ICSD_418858         | insulator  | insulator |

Supplementary Table 183. Five-fold cross validated predictions for the metal/insulator classification (175/598).

| system                      | calculated | predicted |
|-----------------------------|------------|-----------|
| Br2Co1.ICSD_52364           | insulator  | insulator |
| Br2Co5O12Se4.ICSD_416966    | insulator  | insulator |
| Br2Cr1.ICSD_23903           | insulator  | insulator |
| Br2Cs1F1.ICSD_69124         | insulator  | insulator |
| Br2Cs1Li1.ICSD_40479        | insulator  | insulator |
| Br2Cu1O2Sr2.ICSD_1178       | metal      | metal     |
| Br2Cu1.ICSD_22079           | metal      | metal     |
| Br2Cu1.ICSD_409450          | metal      | insulator |
| Br2Cu2O5Te2.ICSD_152960     | insulator  | insulator |
| Br2Cu2O6Sr2Te1.ICSD_172071  | insulator  | insulator |
| Br2Cu3O4Sr2.ICSD_29040      | metal      | metal     |
| Br2Cu3O6Te2.ICSD_414443     | insulator  | insulator |
| Br2Dy1.ICSD_56781           | metal      | insulator |
| Br2Eu1.ICSD_60316           | insulator  | insulator |
| Br2F10Ge1.ICSD_321          | insulator  | insulator |
| Br2F12Pb7.ICSD_92293        | insulator  | insulator |
| Br2Fe1.ICSD_409571          | metal      | insulator |
| Br2Fe1.ICSD_52365           | metal      | metal     |
| Br2Ga6Li8O24Si6.ICSD_87988  | insulator  | insulator |
| Br2Ga6Na8O24Si6.ICSD_417688 | insulator  | insulator |
| Br2Gd2Ge1.ICSD_249475       | metal      | metal     |
| Br2Ge1.ICSD_100088          | insulator  | insulator |
| Br2Ge3La3.ICSD_414172       | metal      | metal     |
| Br2H10N2O2.ICSD_61783       | insulator  | insulator |
| Br2H10N2O2.ICSD_61784       | metal      | insulator |
| Br2H12Mg1O6.ICSD_189844     | insulator  | insulator |
| Br2H12Ni1O14.ICSD_65047     | insulator  | insulator |
| Br2H12Sr7.ICSD_418949       | insulator  | insulator |
| Br2H2O1Sr1.ICSD_76502       | insulator  | insulator |
| Br2H4Mn1O2.ICSD_22084       | insulator  | insulator |
| Br2H6O5U1.ICSD_170208       | insulator  | insulator |
| Br2Hg1K2N2O12.ICSD_24405    | insulator  | insulator |
| Br2Hg1.ICSD_151889          | insulator  | insulator |
| Br2Hg1.ICSD_39319           | insulator  | insulator |
| Br2Hg2O6.ICSD_31925         | insulator  | insulator |
| Br2Hg2Pb1S2.ICSD_85585      | insulator  | insulator |
| Br2Hg2S2Sn1.ICSD_82329      | insulator  | insulator |
| Br2Hg2S2Sn1.ICSD_85584      | insulator  | insulator |
| Br2Hg2.ICSD_23721           | insulator  | insulator |
| Br2Hg3S2.ICSD_82787         | insulator  | insulator |
| Br2Hg3Se2.ICSD_99092        | insulator  | insulator |
| Br2Hg3Te2.ICSD_27402        | insulator  | insulator |
| Br2Hg5O4.ICSD_28232         | metal      | insulator |
| Br2K4O1.ICSD_68505          | insulator  | insulator |
| Br2La1S2Sb1.ICSD_93666      | insulator  | insulator |
| Br2La1.ICSD_65481           | insulator  | insulator |
| Br2La2P1.ICSD_418009        | metal      | metal     |
| Br2Li5N1.ICSD_78836         | insulator  | insulator |
| Br2Mg1.ICSD_165973          | insulator  | insulator |
| Br2Mn1.ICSD_60250           | insulator  | insulator |

Supplementary Table 184. Five-fold cross validated predictions for the metal/insulator classification (176/598).

| system                    | calculated | predicted |
|---------------------------|------------|-----------|
| Br2Mn1.ICSD.67500         | insulator  | insulator |
| Br2Mn1.ICSD.67517         | insulator  | insulator |
| Br2Mn2Sb2Se4.ICSD.172785  | insulator  | insulator |
| Br2Mo1O2.ICSD.422483      | insulator  | insulator |
| Br2Mo6S6.ICSD.100599      | metal      | insulator |
| Br2N3S2V1.ICSD.61088      | insulator  | insulator |
| Br2Na4O1.ICSD.67283       | insulator  | insulator |
| Br2Nb1O1.ICSD.416669      | insulator  | insulator |
| Br2Nb1Se2.ICSD.202821     | insulator  | insulator |
| Br2Nb1Se2.ICSD.202822     | insulator  | insulator |
| Br2Ni1.ICSD.22106         | insulator  | insulator |
| Br2Ni5O12Se4.ICSD.240325  | insulator  | insulator |
| Br2Ni5O12Te4.ICSD.96912   | insulator  | insulator |
| Br2O1Rb4.ICSD.411954      | insulator  | insulator |
| Br2O1S1.ICSD.62972        | insulator  | insulator |
| Br2O1V1.ICSD.24381        | insulator  | insulator |
| Br2O1.ICSD.50198          | metal      | insulator |
| Br2O2Pb3.ICSD.82923       | insulator  | insulator |
| Br2O3.ICSD.78369          | insulator  | insulator |
| Br2O5Sb4.ICSD.24030       | insulator  | insulator |
| Br2O6Pb3Se2.ICSD.422640   | insulator  | insulator |
| Br2O6Pb3Te2.ICSD.248131   | insulator  | insulator |
| Br2O6Sr1.ICSD.61158       | insulator  | insulator |
| Br2Pd1.ICSD.27443         | insulator  | insulator |
| Br2Re6S8.ICSD.40701       | insulator  | insulator |
| Br2Re6Se8.ICSD.202824     | insulator  | insulator |
| Br2S2.ICSD.37020          | insulator  | insulator |
| Br2Se2.ICSD.37017         | insulator  | insulator |
| Br2Se2.ICSD.37019         | insulator  | insulator |
| Br2Sn1.ICSD.411177        | metal      | insulator |
| Br2Sr1.ICSD.15972         | metal      | insulator |
| Br2Sr1.ICSD.262673        | insulator  | insulator |
| Br2Ti1.ICSD.26078         | insulator  | insulator |
| Br2V1.ICSD.246906         | insulator  | insulator |
| Br2Yb1.ICSD.26045         | insulator  | insulator |
| Br2Zn1.ICSD.26080         | insulator  | insulator |
| Br2.ICSD.201693           | insulator  | insulator |
| Br3C1Cd1H6N3.ICSD.71850   | insulator  | insulator |
| Br3C1Eu2Li1N2.ICSD.415050 | insulator  | insulator |
| Br3C1F1.ICSD.72370        | insulator  | insulator |
| Br3C1Li1N2Sr2.ICSD.415051 | insulator  | insulator |
| Br3C2H8Hg1N1.ICSD.110527  | insulator  | insulator |
| Br3Ca1Cs1.ICSD.77242      | insulator  | insulator |
| Br3Ca1In1.ICSD.54138      | insulator  | insulator |
| Br3Cd1Cs1.ICSD.24483      | insulator  | insulator |
| Br3Cd1Cs1.ICSD.281176     | insulator  | insulator |
| Br3Cd1Cs1.ICSD.41453      | insulator  | insulator |
| Br3Cd1H4N1.ICSD.71849     | insulator  | insulator |
| Br3Cd1H5N2.ICSD.71851     | insulator  | insulator |
| Br3Cd1In1.ICSD.79512      | insulator  | insulator |

Supplementary Table 185. Five-fold cross validated predictions for the metal/insulator classification (177/598).

| system                   | calculated | predicted |
|--------------------------|------------|-----------|
| Br3Cd1Rb1.ICSD.808       | insulator  | insulator |
| Br3Cd1Tl1.ICSD.39808     | insulator  | insulator |
| Br3Cd4P2.ICSD.75508      | insulator  | insulator |
| Br3Ce1.ICSD.31582        | metal      | insulator |
| Br3Ce3Ga1.ICSD.409846    | metal      | metal     |
| Br3Cr1In1.ICSD.54136     | insulator  | insulator |
| Br3Cr1.ICSD.24768        | insulator  | insulator |
| Br3Cs1Cu1.ICSD.10184     | insulator  | insulator |
| Br3Cs1Cu2.ICSD.49613     | insulator  | insulator |
| Br3Cs1Dy1.ICSD.300285    | metal      | insulator |
| Br3Cs1Ge1.ICSD.80317     | insulator  | insulator |
| Br3Cs1Ge1.ICSD.80319     | insulator  | insulator |
| Br3Cs1Ge1.ICSD.80320     | insulator  | insulator |
| Br3Cs1Hg1.ICSD.24479     | metal      | insulator |
| Br3Cs1Li2.ICSD.245981    | insulator  | insulator |
| Br3Cs1Mg1.ICSD.87260     | insulator  | insulator |
| Br3Cs1Mn1.ICSD.2782      | insulator  | insulator |
| Br3Cs1Pb1.ICSD.109295    | insulator  | insulator |
| Br3Cs1Pb1.ICSD.29073     | insulator  | insulator |
| Br3Cs1Sn1.ICSD.4071      | insulator  | insulator |
| Br3Cs1V1.ICSD.201833     | insulator  | insulator |
| Br3Cs1Yb1.ICSD.77243     | insulator  | insulator |
| Br3Cu1K2.ICSD.150293     | insulator  | insulator |
| Br3Cu1Rb2.ICSD.150295    | insulator  | insulator |
| Br3Cu2Rb1.ICSD.150306    | insulator  | insulator |
| Br3F3N3P3.ICSD.16099     | insulator  | insulator |
| Br3F6S1Sb1.ICSD.66842    | insulator  | insulator |
| Br3Fe1In1.ICSD.75469     | insulator  | insulator |
| Br3Fe1K1.ICSD.4064       | insulator  | insulator |
| Br3Fe1Th1.ICSD.36217     | insulator  | insulator |
| Br3Fe1.ICSD.410924       | insulator  | insulator |
| Br3Ga1La3.ICSD.95072     | metal      | metal     |
| Br3Ga1Li1.ICSD.61338     | insulator  | insulator |
| Br3Ga1.ICSD.413456       | insulator  | insulator |
| Br3Gd1.ICSD.2610         | insulator  | insulator |
| Br3Gd2N1.ICSD.402278     | insulator  | insulator |
| Br3Gd2.ICSD.9581         | insulator  | metal     |
| Br3Gd5O10Se2.ICSD.419349 | insulator  | insulator |
| Br3Ge1Rb1.ICSD.65244     | insulator  | insulator |
| Br3Hg2Te1.ICSD.417407    | insulator  | insulator |
| Br3Hg3Sb2Th1.ICSD.411521 | insulator  | insulator |
| Br3In1K1.ICSD.50510      | insulator  | insulator |
| Br3In1Mg1.ICSD.402533    | insulator  | insulator |
| Br3In1Mn1.ICSD.75470     | insulator  | insulator |
| Br3In1.ICSD.65198        | insulator  | insulator |
| Br3Ir1.ICSD.14212        | insulator  | insulator |
| Br3K1Mn1.ICSD.42441      | insulator  | insulator |
| Br3La1.ICSD.31581        | insulator  | insulator |
| Br3La1.ICSD.65479        | insulator  | insulator |
| Br3La3Ni1.ICSD.391469    | metal      | metal     |

Supplementary Table 186. Five-fold cross validated predictions for the metal/insulator classification (178/598).

| system                      | calculated | predicted |
|-----------------------------|------------|-----------|
| Br3La3Si1_ICSD_411800       | metal      | metal     |
| Br3La6Si7_ICSD_408032       | metal      | metal     |
| Br3Li6N1_ICSD_16798         | insulator  | insulator |
| Br3Li6N1_ICSD_84092         | insulator  | insulator |
| Br3Mn1Rb1_ICSD_14077        | insulator  | insulator |
| Br3Mo1Te6_ICSD_82246        | insulator  | insulator |
| Br3N1Se2_ICSD_83696         | insulator  | insulator |
| Br3N3S4_ICSD_14049          | insulator  | insulator |
| Br3Nb1O1_ICSD_418089        | insulator  | insulator |
| Br3Ni1Rb1_ICSD_15011        | insulator  | insulator |
| Br3O1P1_ICSD_23243          | insulator  | insulator |
| Br3O1P1_ICSD_9137           | insulator  | insulator |
| Br3O1Pa1_ICSD_1892          | insulator  | insulator |
| Br3P1_ICSD_8052             | insulator  | insulator |
| Br3Pr1_ICSD_31583           | insulator  | insulator |
| Br3Pr1_ICSD_65077           | insulator  | insulator |
| Br3Pu1_ICSD_31588           | metal      | metal     |
| Br3Rb1Ti1_ICSD_154257       | insulator  | insulator |
| Br3Rb1V1_ICSD_201831        | insulator  | insulator |
| Br3Rh1_ICSD_28245           | insulator  | insulator |
| Br3Ru1_ICSD_413691          | metal      | metal     |
| Br3Ru1_ICSD_414042          | metal      | insulator |
| Br3Sb1_ICSD_14217           | insulator  | insulator |
| Br3Si1Tb3_ICSD_409655       | metal      | metal     |
| Br3Tc1_ICSD_260162          | insulator  | insulator |
| Br3Ti1_ICSD_39242           | insulator  | insulator |
| Br3U1_ICSD_4070             | insulator  | insulator |
| Br3Zr1_ICSD_4068            | metal      | metal     |
| Br4C1N2S3_ICSD_32746        | insulator  | insulator |
| Br4C2H12Hg1N6_ICSD_260202   | insulator  | insulator |
| Br4C4H8Si1_ICSD_171154      | insulator  | insulator |
| Br4C6Cd1Hg4N6S6_ICSD_412498 | insulator  | insulator |
| Br4C6O6Ru2_ICSD_48158       | insulator  | insulator |
| Br4C8O8W2_ICSD_49689        | insulator  | insulator |
| Br4Cd1Cs2_ICSD_40415        | metal      | insulator |
| Br4Cd1Cs2_ICSD_40416        | insulator  | insulator |
| Br4Cs1Ga1_ICSD_4037         | insulator  | insulator |
| Br4Cs1Ti1_ICSD_61180        | insulator  | insulator |
| Br4Cs2Hg1_ICSD_200910       | insulator  | insulator |
| Br4Cs2Hg1_ICSD_54047        | metal      | insulator |
| Br4Cs2I2Pd1_ICSD_240482     | insulator  | insulator |
| Br4Cs2I2Pd1_ICSD_412833     | insulator  | insulator |
| Br4Cs2Mn1_ICSD_27251        | insulator  | insulator |
| Br4Cs2O2U1_ICSD_20130       | insulator  | insulator |
| Br4Cs2Re6Se8_ICSD_88611     | insulator  | insulator |
| Br4Cs2Zn1_ICSD_41537        | insulator  | insulator |
| Br4Cs3Li1_ICSD_245976       | insulator  | insulator |
| Br4Cu1H12N2O2_ICSD_88887    | metal      | insulator |
| Br4Fe1Li2_ICSD_82200        | insulator  | insulator |
| Br4Fe1Ti1_ICSD_402064       | insulator  | insulator |

Supplementary Table 187. Five-fold cross validated predictions for the metal/insulator classification (179/598).

| system                  | calculated | predicted |
|-------------------------|------------|-----------|
| Br4Ga1Li1_ICSD_61337    | insulator  | insulator |
| Br4Ga1Na1_ICSD_69650    | insulator  | insulator |
| Br4Ga2_ICSD_62665       | insulator  | insulator |
| Br4Ge1_ICSD_409856      | insulator  | insulator |
| Br4Ge1_ICSD_409857      | insulator  | insulator |
| Br4Ge4S6_ICSD_24370     | insulator  | insulator |
| Br4Hg3Te1_ICSD_82788    | insulator  | insulator |
| Br4I2Pd1Rb2_ICSD_412835 | insulator  | insulator |
| Br4In1K1_ICSD_409063    | insulator  | insulator |
| Br4In1Na1_ICSD_65462    | insulator  | insulator |
| Br4In2_ICSD_60851       | insulator  | insulator |
| Br4K1Ti1_ICSD_35418     | insulator  | insulator |
| Br4K2Pd1_ICSD_1982      | insulator  | insulator |
| Br4K2Pt1_ICSD_6063      | insulator  | insulator |
| Br4K2Zn1_ICSD_78449     | insulator  | insulator |
| Br4K2Zn1_ICSD_99702     | insulator  | insulator |
| Br4Li2Mg1_ICSD_73276    | insulator  | insulator |
| Br4Li2Mn1_ICSD_33865    | insulator  | insulator |
| Br4Li2Zn1_ICSD_73223    | insulator  | insulator |
| Br4Mn1Rb2_ICSD_8174     | insulator  | insulator |
| Br4Na2Zn1_ICSD_73224    | insulator  | insulator |
| Br4Nb1O1Ti1_ICSD_415203 | insulator  | insulator |
| Br4O1Rb6_ICSD_411955    | insulator  | insulator |
| Br4O1W1_ICSD_49547      | insulator  | insulator |
| Br4Os1Y4_ICSD_71513     | insulator  | metal     |
| Br4Os1_ICSD_61042       | insulator  | insulator |
| Br4Pa1_ICSD_16123       | metal      | insulator |
| Br4Pd4Te3_ICSD_418003   | insulator  | insulator |
| Br4Rb2Zn1_ICSD_63000    | insulator  | insulator |
| Br4Rb2Zn1_ICSD_77077    | insulator  | insulator |
| Br4Rb2Zn1_ICSD_77078    | insulator  | insulator |
| Br4Rb2Zn1_ICSD_97854    | insulator  | insulator |
| Br4S1Ti6_ICSD_40521     | insulator  | insulator |
| Br4S1W1_ICSD_16126      | insulator  | insulator |
| Br4Si1_ICSD_710060      | insulator  | insulator |
| Br4Si1_ICSD_710061      | insulator  | insulator |
| Br4Sn1_ICSD_26033       | insulator  | insulator |
| Br4Tc1_ICSD_249920      | metal      | insulator |
| Br4Th1_ICSD_130013      | insulator  | insulator |
| Br4Th1_ICSD_6056        | insulator  | insulator |
| Br4Ti1_ICSD_22103       | insulator  | insulator |
| Br4Ti1_ICSD_39241       | insulator  | insulator |
| Br4Ti2_ICSD_14216       | insulator  | insulator |
| Br4U1_ICSD_2339         | insulator  | insulator |
| Br5C2Ce4_ICSD_418408    | metal      | metal     |
| Br5C2La4_ICSD_418409    | metal      | metal     |
| Br5Cd1Cs3_ICSD_39599    | insulator  | insulator |
| Br5Ce2_ICSD_167088      | insulator  | insulator |
| Br5Cs1Hg2_ICSD_200751   | insulator  | insulator |
| Br5Cs1Sn2_ICSD_151987   | insulator  | insulator |

Supplementary Table 188. Five-fold cross validated predictions for the metal/insulator classification (180/598).

| system                    | calculated | predicted |
|---------------------------|------------|-----------|
| Br5Cs3Fe1.ICSD.4065       | insulator  | insulator |
| Br5Cs3Hg1.ICSD.200538     | insulator  | insulator |
| Br5Dy2Li1.ICSD.402192     | metal      | insulator |
| Br5In1Sn2.ICSD.152014     | insulator  | insulator |
| Br5K1Sn2.ICSD.152005      | insulator  | insulator |
| Br5K2Pr1.ICSD.48191       | insulator  | insulator |
| Br5K2U1.ICSD.72616        | insulator  | insulator |
| Br5La2.ICSD.65480         | insulator  | insulator |
| Br5Nb1.ICSD.409917        | insulator  | insulator |
| Br5Nb1.ICSD.67298         | insulator  | insulator |
| Br5Nd3S2.ICSD.60134       | insulator  | insulator |
| Br5P1.ICSD.22140          | insulator  | insulator |
| Br5Pa1.ICSD.22132         | insulator  | insulator |
| Br5Pb1Ti3.ICSD.15594      | insulator  | insulator |
| Br5Pb1Ti3.ICSD.200875     | insulator  | insulator |
| Br5Pb2Rb1.ICSD.151990     | insulator  | insulator |
| Br5Pr2.ICSD.62231         | insulator  | insulator |
| Br5Rb1Sn2.ICSD.151989     | insulator  | insulator |
| Br5Rb3Zn1.ICSD.41536      | insulator  | insulator |
| Br5Ru1Y4.ICSD.165336      | insulator  | insulator |
| Br5Sn2Ti1.ICSD.151988     | insulator  | insulator |
| Br5Ta1.ICSD.109324        | insulator  | insulator |
| Br5W1.ICSD.409227         | insulator  | insulator |
| Br6Ca1Th1.ICSD.78768      | insulator  | insulator |
| Br6Cd1Rb4.ICSD.60625      | insulator  | insulator |
| Br6Cs2Na1Y1.ICSD.65733    | insulator  | insulator |
| Br6Cs2Pt1.ICSD.77381      | insulator  | insulator |
| Br6Cs2Sn1.ICSD.158957     | insulator  | insulator |
| Br6Cs2Te1.ICSD.24151      | insulator  | insulator |
| Br6Cs2Te1.ICSD.65058      | insulator  | insulator |
| Br6Cs2U1.ICSD.20159       | metal      | insulator |
| Br6Cs2W1.ICSD.402441      | metal      | insulator |
| Br6Cs4Pb1.ICSD.25124      | insulator  | insulator |
| Br6Dy1Li1Rb2.ICSD.402536  | insulator  | insulator |
| Br6Eu4O1.ICSD.65172       | insulator  | insulator |
| Br6Gd1Na3.ICSD.82354      | insulator  | insulator |
| Br6Gd4Si1.ICSD.409839     | metal      | metal     |
| Br6H12Mg1O6Zn2.ICSD.49914 | insulator  | insulator |
| Br6H12N4Sc2.ICSD.281573   | insulator  | insulator |
| Br6H12O6Zn3.ICSD.64614    | insulator  | insulator |
| Br6H16Hg1N4.ICSD.391363   | insulator  | insulator |
| Br6H16Hg1N4.ICSD.391364   | insulator  | insulator |
| Br6H6N2Sc2.ICSD.281574    | insulator  | insulator |
| Br6H8N2Re1.ICSD.412159    | insulator  | insulator |
| Br6Hg1Ti4.ICSD.9325       | insulator  | insulator |
| Br6Hg3Se2Zr1.ICSD.412467  | insulator  | insulator |
| Br6Hg7P4Sn1.ICSD.411860   | insulator  | insulator |
| Br6Hg7P4.ICSD.73818       | insulator  | insulator |
| Br6In2Th1.ICSD.80180      | insulator  | insulator |
| Br6In2Zr1.ICSD.54137      | insulator  | insulator |

Supplementary Table 189. Five-fold cross validated predictions for the metal/insulator classification (181/598).

| system                   | calculated | predicted |
|--------------------------|------------|-----------|
| Br6K2Os1.ICSD.26770      | metal      | insulator |
| Br6K2Pt1.ICSD.23771      | insulator  | insulator |
| Br6K2Re1.ICSD.26623      | insulator  | insulator |
| Br6K2Se1.ICSD.36228      | insulator  | insulator |
| Br6K2Sn1.ICSD.158955     | insulator  | insulator |
| Br6K2Te1.ICSD.37270      | insulator  | insulator |
| Br6K2Te1.ICSD.65118      | insulator  | insulator |
| Br6Mo6S3.ICSD.35356      | insulator  | insulator |
| Br6N3P3.ICSD.27271       | insulator  | insulator |
| Br6Na1O2W2.ICSD.408934   | metal      | insulator |
| Br6Na3Sc1.ICSD.401335    | insulator  | insulator |
| Br6Na3Y1.ICSD.82355      | insulator  | insulator |
| Br6Nb2Se2.ICSD.35375     | insulator  | insulator |
| Br6Nb2Te2.ICSD.35376     | insulator  | insulator |
| Br6O1Sr4.ICSD.418452     | insulator  | insulator |
| Br6Pb1Rb4.ICSD.65300     | insulator  | insulator |
| Br6Pb2Pd1.ICSD.78874     | insulator  | insulator |
| Br6Pb4Se1.ICSD.21039     | insulator  | insulator |
| Br6Pd1Rb2.ICSD.36305     | insulator  | insulator |
| Br6Pd1Se2.ICSD.405774    | insulator  | insulator |
| Br6Rb2Sn1.ICSD.158956    | insulator  | insulator |
| Br6Rb2Te1.ICSD.49520     | insulator  | insulator |
| Br6Rb2Te1.ICSD.49521     | insulator  | insulator |
| Br6Rb2U1.ICSD.20158      | metal      | insulator |
| Br6Rb2U1.ICSD.82949      | insulator  | insulator |
| Br6Rb2W1.ICSD.402439     | metal      | metal     |
| Br6Se8Ta3.ICSD.408596    | metal      | insulator |
| Br6Si1Tb4.ICSD.409703    | metal      | metal     |
| Br6Sr1Th1.ICSD.78769     | insulator  | insulator |
| Br6Te1Ti2.ICSD.99127     | insulator  | insulator |
| Br6W1.ICSD.62048         | insulator  | insulator |
| Br7Fe1Se1.ICSD.39528     | insulator  | insulator |
| Br7Fe1Te1.ICSD.39531     | insulator  | insulator |
| Br7Ga1Se1.ICSD.78913     | insulator  | insulator |
| Br7Hg6In1Sb4.ICSD.420139 | insulator  | insulator |
| Br7Hg6Sb5.ICSD.411219    | insulator  | insulator |
| Br7In4.ICSD.401451       | insulator  | insulator |
| Br7Nb3S1.ICSD.81078      | insulator  | insulator |
| Br7P1.ICSD.26025         | insulator  | insulator |
| Br7S1Ta3.ICSD.51101      | insulator  | insulator |
| Br7Tb6.ICSD.14182        | metal      | metal     |
| Br8Cs2Re2.ICSD.26060     | insulator  | insulator |
| Br8Ga2Pd1.ICSD.413229    | insulator  | insulator |
| Br8Gd5.ICSD.38042        | metal      | metal     |
| Br8Ge38P8.ICSD.22031     | insulator  | insulator |
| Br8Hg2Pd1Rb2.ICSD.203188 | insulator  | insulator |
| Br8Li6Mg1.ICSD.73275     | insulator  | insulator |
| Br8N4P4.ICSD.2716        | insulator  | insulator |
| Br8Nb3.ICSD.25766        | insulator  | insulator |
| Br8S9Ta4.ICSD.171236     | insulator  | insulator |

Supplementary Table 190. Five-fold cross validated predictions for the metal/insulator classification (182/598).

| system                          | calculated | predicted |
|---------------------------------|------------|-----------|
| Br8Tb5_ICSD_38041               | metal      | metal     |
| Br9Cs3Er2_ICSD_203114           | insulator  | insulator |
| Br9Cs3Ho2_ICSD_72798            | insulator  | insulator |
| Br9Cs3Mo2_ICSD_26213            | insulator  | insulator |
| Br9Cs3Tb2_ICSD_203109           | insulator  | insulator |
| Br9Cs3Y2_ICSD_37221             | insulator  | insulator |
| Br9Cs5Nb2S4_ICSD_410590         | insulator  | insulator |
| Br9In7_ICSD_78804               | insulator  | insulator |
| Br9K3Mo2_ICSD_202299            | insulator  | insulator |
| Br9Mo2Rb3_ICSD_202293           | insulator  | insulator |
| Br9Nb2Rb3_ICSD_402032           | insulator  | insulator |
| Br9Nb2S4Ti5_ICSD_418796         | insulator  | insulator |
| Br9O4Pb8Ti1_ICSD_36007          | insulator  | insulator |
| Br9Os2Rb3_ICSD_56896            | insulator  | insulator |
| Br9Rb3Sb2_ICSD_39823            | insulator  | insulator |
| Br9Rb3V2_ICSD_61235             | insulator  | insulator |
| Br9Ta1Te1_ICSD_410949           | insulator  | insulator |
| Br9Te1W1_ICSD_410948            | insulator  | insulator |
| C1.06Mo6Ni6_ICSD_77164          | metal      | metal     |
| C10Cl1Co3O9_ICSD_200825         | insulator  | insulator |
| C10Cl4La8_ICSD_416907           | metal      | metal     |
| C10Co1H14N8O2_ICSD_109797       | metal      | insulator |
| C10Cs1_ICSD_657337              | insulator  | insulator |
| C10Cu2H18N2O10_ICSD_171405      | insulator  | insulator |
| C10Fe22Mo12_ICSD_61141          | metal      | metal     |
| C10H14N8Ni1O2_ICSD_109784       | insulator  | insulator |
| C10H18N2O10Rh2_ICSD_172424      | insulator  | insulator |
| C10Hg1Mn2O10_ICSD_71879         | insulator  | insulator |
| C10O10Os3S1_ICSD_201861         | insulator  | insulator |
| C11N4_ICSD_184896               | insulator  | metal     |
| C11N4_ICSD_184897               | metal      | insulator |
| C12Cl12N12O4P4S12Sb4_ICSD_80097 | insulator  | insulator |
| C12Cl6Gd10_ICSD_420618          | metal      | metal     |
| C12Co2N12Zn3_ICSD_157849        | insulator  | metal     |
| C12Dy8Rh5_ICSD_617616           | metal      | metal     |
| C12F10Se1_ICSD_410720           | insulator  | insulator |
| C12Fe2N12Zn3_ICSD_157850        | metal      | insulator |
| C12Gd8Rh5_ICSD_617956           | metal      | metal     |
| C12H36I4Ni1O6S6_ICSD_170024     | insulator  | insulator |
| C12Ho8Rh5_ICSD_618102           | metal      | metal     |
| C12Mn2O12Pt1_ICSD_41117         | insulator  | insulator |
| C12N6_ICSD_30815                | insulator  | insulator |
| C12Ni4O18P4_ICSD_14337          | insulator  | insulator |
| C12O12Pt1Re2_ICSD_60074         | insulator  | insulator |
| C12O12Ru4Se4_ICSD_92913         | insulator  | insulator |
| C12Rh5Tb8_ICSD_618726           | metal      | metal     |
| C12Rh5Y8_ICSD_618734            | metal      | metal     |
| C14Cl12H24Mn1N8Nb6_ICSD_110055  | insulator  | insulator |
| C14H24K1Mn1N8_ICSD_107665       | insulator  | insulator |
| C14H28Mn1N6O4S2_ICSD_409689     | metal      | insulator |

Supplementary Table 191. Five-fold cross validated predictions for the metal/insulator classification (183/598).

| system                     | calculated | predicted |
|----------------------------|------------|-----------|
| C15Dy12Mn5_ICSD_81770      | metal      | metal     |
| C15Os5Tb12_ICSD_86729      | metal      | metal     |
| C16Co4O16Sn1_ICSD_67320    | insulator  | insulator |
| C16Cr2H24O8Sb4_ICSD_241130 | insulator  | insulator |
| C18Er10Mn13_ICSD_603261    | metal      | metal     |
| C18Ho10Mn13_ICSD_603286    | metal      | metal     |
| C18Lu10Mn13_ICSD_603277    | metal      | metal     |
| C18Mn13Tb10_ICSD_603285    | metal      | metal     |
| C18Mn13Y10_ICSD_603284     | metal      | metal     |
| C18Ru12Th11_ICSD_79240     | metal      | metal     |
| C19Er10Ru10_ICSD_59419     | metal      | metal     |
| C19Er15_ICSD_76817         | metal      | metal     |
| C19Ho15_ICSD_618080        | metal      | metal     |
| C19Sc15_ICSD_42631         | metal      | metal     |
| C19Y15_ICSD_619118         | metal      | metal     |
| C1Ca1F1K1O3_ICSD_154682    | insulator  | insulator |
| C1Ca1F1O3Rb1_ICSD_262232   | insulator  | insulator |
| C1Ca1H12O9_ICSD_151488     | insulator  | insulator |
| C1Ca1H2O4_ICSD_100847      | insulator  | insulator |
| C1Ca1N2_ICSD_26677         | insulator  | insulator |
| C1Ca1O3_ICSD_150           | insulator  | insulator |
| C1Ca1O3_ICSD_161820        | insulator  | insulator |
| C1Ca1O3_ICSD_169933        | insulator  | insulator |
| C1Ca1O3_ICSD_181959        | insulator  | insulator |
| C1Ca1O3_ICSD_280991        | insulator  | insulator |
| C1Ca1O3_ICSD_52152         | insulator  | insulator |
| C1Ca1O3_ICSD_83607         | insulator  | insulator |
| C1Ca1Pd3_ICSD_108128       | metal      | metal     |
| C1Ca2F2O3_ICSD_100607      | insulator  | insulator |
| C1Ca4N4_ICSD_167787        | insulator  | insulator |
| C1Ca7H4O23Si6_ICSD_73333   | insulator  | insulator |
| C1Cd1Cl2H4N2O1_ICSD_39960  | insulator  | insulator |
| C1Cd1N2_ICSD_95264         | insulator  | insulator |
| C1Cd1N2_ICSD_95265         | insulator  | insulator |
| C1Cd1O3_ICSD_20181         | insulator  | insulator |
| C1Cd1Ti2_ICSD_42924        | metal      | metal     |
| C1Cd1_ICSD_183177          | metal      | metal     |
| C1Cd1_ICSD_183178          | metal      | metal     |
| C1Cd3H2O8Se1_ICSD_95816    | insulator  | insulator |
| C1Ce1Cr2Si2_ICSD_160692    | metal      | metal     |
| C1Ce1F1O3_ICSD_81673       | insulator  | insulator |
| C1Ce1H2O6P2_ICSD_262898    | insulator  | insulator |
| C1Ce1Mo2Si2_ICSD_189334    | metal      | metal     |
| C1Ce1P1Ru2_ICSD_260480     | metal      | metal     |
| C1Ce1Rh3_ICSD_76774        | metal      | metal     |
| C1Ce1_ICSD_76769           | metal      | metal     |
| C1Ce3In1_ICSD_76770        | metal      | metal     |
| C1Ce3In1_ICSD_98501        | metal      | metal     |
| C1Ce3Pb1_ICSD_76773        | metal      | metal     |
| C1Ce3Sn1_ICSD_76776        | metal      | metal     |

Supplementary Table 192. Five-fold cross validated predictions for the metal/insulator classification (184/598).

| system                      | calculated | predicted |
|-----------------------------|------------|-----------|
| C1Ce3Ti1.ICSD_76778         | metal      | metal     |
| C1Cl14Ti6.ICSD_75502        | insulator  | insulator |
| C1Cl14Zr6.ICSD_202915       | insulator  | insulator |
| C1Cl18Rb4Zr6.ICSD_165401    | insulator  | insulator |
| C1Cl18W6.ICSD_413026        | insulator  | insulator |
| C1Cl1Co1H18N6O3.ICSD_412059 | insulator  | insulator |
| C1Cl1Cu1H2N2.ICSD_247128    | insulator  | insulator |
| C1Cl1Cu1O1.ICSD_63490       | insulator  | insulator |
| C1Cl1F3O3S1.ICSD_96950      | insulator  | insulator |
| C1Cl1F3.ICSD_49696          | insulator  | insulator |
| C1Cl1F4I1.ICSD_280343       | insulator  | insulator |
| C1Cl1Gd2.ICSD_68798         | metal      | metal     |
| C1Cl1H3O1S1.ICSD_107497     | insulator  | insulator |
| C1Cl1H4N5.ICSD_2762         | insulator  | insulator |
| C1Cl1H5N2O4S1.ICSD_39575    | insulator  | insulator |
| C1Cl1H5N2S1.ICSD_250292     | insulator  | insulator |
| C1Cl1H6N1O1.ICSD_241238     | insulator  | insulator |
| C1Cl1H6N3O1.ICSD_62660      | insulator  | insulator |
| C1Cl1Hg1N1S1.ICSD_409579    | insulator  | insulator |
| C1Cl1La1N2.ICSD_413904      | insulator  | insulator |
| C1Cl1La2N3.ICSD_412412      | insulator  | insulator |
| C1Cl1La2.ICSD_400894        | metal      | metal     |
| C1Cl1N1O2S2.ICSD_91453      | insulator  | insulator |
| C1Cl1N1Pb1S1.ICSD_409835    | insulator  | insulator |
| C1Cl1N1.ICSD_16660          | insulator  | insulator |
| C1Cl1N5S3.ICSD_62270        | insulator  | insulator |
| C1Cl2Eu2N2.ICSD_391256      | insulator  | insulator |
| C1Cl2F2.ICSD_33947          | insulator  | insulator |
| C1Cl2F2.ICSD_33948          | insulator  | insulator |
| C1Cl2Gd2.ICSD_400348        | insulator  | insulator |
| C1Cl2H3N1O2S1.ICSD_151036   | insulator  | insulator |
| C1Cl2Hg2N2.ICSD_412608      | insulator  | insulator |
| C1Cl2Lu2.ICSD_62227         | insulator  | insulator |
| C1Cl2N2Sr2.ICSD_391257      | insulator  | insulator |
| C1Cl2O3Pb2.ICSD_36241       | insulator  | insulator |
| C1Cl2Sc2.ICSD_59124         | insulator  | metal     |
| C1Cl3F1.ICSD_80891          | insulator  | insulator |
| C1Cl3F3Si1.ICSD_173735      | insulator  | insulator |
| C1Cl3Gd3.ICSD_37323         | metal      | metal     |
| C1Cl3H3Te1.ICSD_281531      | insulator  | insulator |
| C1Cl4H5N1Si2.ICSD_410261    | insulator  | insulator |
| C1Cl5H6Hg2N3.ICSD_59241     | insulator  | insulator |
| C1Cl6H2O4Pb4.ICSD_88936     | insulator  | insulator |
| C1Cl6N1Sb1.ICSD_279639      | insulator  | insulator |
| C1Cl8Sc5.ICSD_60855         | metal      | metal     |
| C1Co12Ge4U6.ICSD_181657     | metal      | metal     |
| C1Co1Dy1.ICSD_61687         | metal      | metal     |
| C1Co1Er1.ICSD_61689         | metal      | metal     |
| C1Co1Fe2.ICSD_167128        | metal      | metal     |
| C1Co1Gd1.ICSD_61685         | metal      | metal     |

Supplementary Table 193. Five-fold cross validated predictions for the metal/insulator classification (185/598).

| system                  | calculated | predicted |
|-------------------------|------------|-----------|
| C1Co1Ho1.ICSD_61688     | metal      | metal     |
| C1Co1Lu1.ICSD_61691     | metal      | metal     |
| C1Co1N2.ICSD_249387     | metal      | metal     |
| C1Co1O3.ICSD_61066      | insulator  | insulator |
| C1Co1Tb1.ICSD_61686     | metal      | metal     |
| C1Co1Tm1.ICSD_61690     | metal      | metal     |
| C1Co1Y1.ICSD_96327      | metal      | metal     |
| C1Co2Mn2.ICSD_44353     | metal      | metal     |
| C1Co2Mo4.ICSD_76136     | metal      | metal     |
| C1Co2Nb4.ICSD_617428    | metal      | metal     |
| C1Co2Ta4.ICSD_617448    | metal      | metal     |
| C1Co2W4.ICSD_617463     | metal      | metal     |
| C1Co2.ICSD_617391       | metal      | metal     |
| C1Co3Mg1.ICSD_76790     | metal      | metal     |
| C1Co3Mo3.ICSD_617424    | metal      | metal     |
| C1Co3Nb3.ICSD_617429    | metal      | metal     |
| C1Co3Sc1.ICSD_76793     | metal      | metal     |
| C1Co3Sn1.ICSD_108129    | metal      | metal     |
| C1Co3Ta3.ICSD_76794     | metal      | metal     |
| C1Co3W3.ICSD_166747     | metal      | metal     |
| C1Co3Zn1.ICSD_76797     | metal      | metal     |
| C1Co3.ICSD_43521        | metal      | metal     |
| C1Co6Mo6.ICSD_617425    | metal      | metal     |
| C1Co6W6.ICSD_165459     | metal      | metal     |
| C1Cr1.ICSD_181709       | metal      | metal     |
| C1Cr1.ICSD_603179       | metal      | metal     |
| C1Cr2Ga1.ICSD_419116    | metal      | metal     |
| C1Cr2Ge1.ICSD_166030    | metal      | metal     |
| C1Cr2La1Si2.ICSD_160691 | metal      | metal     |
| C1Cr2Pr1Si2.ICSD_152143 | metal      | metal     |
| C1Cr2Si1.ICSD_183361    | metal      | metal     |
| C1Cr3Ge1.ICSD_42629     | metal      | metal     |
| C1Cr3Nb3.ICSD_76131     | metal      | metal     |
| C1Cr3P1.ICSD_617527     | metal      | metal     |
| C1Cr3.ICSD_603557       | metal      | metal     |
| C1Cr3.ICSD_617486       | metal      | metal     |
| C1Cr5Si3.ICSD_617535    | metal      | metal     |
| C1Cs1F3O1.ICSD_69971    | insulator  | insulator |
| C1Cs1F3O3S1.ICSD_415056 | insulator  | insulator |
| C1Cs1H1N2O2.ICSD_170588 | insulator  | insulator |
| C1Cs1H1O2.ICSD_172202   | insulator  | insulator |
| C1Cs1H1O3.ICSD_300259   | insulator  | insulator |
| C1Cs1I14Zr6.ICSD_60917  | metal      | insulator |
| C1Cs1N1S1.ICSD_60875    | insulator  | insulator |
| C1Cs2H6O6.ICSD_411684   | insulator  | insulator |
| C1Cs2I18Zr7.ICSD_72606  | insulator  | metal     |
| C1Cs2O3.ICSD_14156      | insulator  | insulator |
| C1Cs4O4.ICSD_245445     | insulator  | insulator |
| C1Cs4O4.ICSD_245446     | insulator  | insulator |
| C1Cs4O4.ICSD_245447     | insulator  | insulator |

Supplementary Table 194. Five-fold cross validated predictions for the metal/insulator classification (186/598).

| system                    | calculated | predicted |
|---------------------------|------------|-----------|
| C1Cs4O4.ICSD.245449       | insulator  | insulator |
| C1Cs4O4.ICSD.245450       | insulator  | insulator |
| C1Cs4O4.ICSD.245451       | insulator  | insulator |
| C1Cs4O4.ICSD.245453       | insulator  | insulator |
| C1Cu1F1K1O3.ICSD.75401    | insulator  | insulator |
| C1Cu1H1O4Ti1.ICSD.74875   | insulator  | insulator |
| C1Cu1H1O5S1.ICSD.281184   | insulator  | insulator |
| C1Cu1H8N2O5P2.ICSD.279591 | insulator  | insulator |
| C1Cu1N1S1.ICSD.124        | insulator  | insulator |
| C1Cu1N1S1.ICSD.24372      | insulator  | insulator |
| C1Cu1N1S1.ICSD.32578      | insulator  | insulator |
| C1Cu1N2.ICSD.415220       | metal      | insulator |
| C1Cu1O3.ICSD.6179         | insulator  | insulator |
| C1Dy1Fe2Si1.ICSD.40773    | metal      | metal     |
| C1Dy1H1O4.ICSD.409351     | insulator  | insulator |
| C1Dy1Rh3.ICSD.76814       | metal      | metal     |
| C1Dy1Ru2Si1.ICSD.50633    | metal      | metal     |
| C1Dy2Fe2Si2.ICSD.67467    | metal      | metal     |
| C1Dy2N2O2.ICSD.416881     | insulator  | insulator |
| C1Dy2.ICSD.108130         | metal      | metal     |
| C1Dy3Ga1.ICSD.76812       | metal      | metal     |
| C1Dy3In1.ICSD.56400       | metal      | metal     |
| C1Dy3Pb1.ICSD.56410       | metal      | metal     |
| C1Dy3Sn1.ICSD.56406       | metal      | metal     |
| C1Dy3Ti1.ICSD.76815       | metal      | metal     |
| C1Dy5Ge3.ICSD.617597      | metal      | metal     |
| C1Dy5Si3.ICSD.617618      | metal      | metal     |
| C1Er1Rh3.ICSD.108131      | metal      | metal     |
| C1Er2Fe2Si2.ICSD.617663   | metal      | metal     |
| C1Er2N2O2.ICSD.416880     | insulator  | insulator |
| C1Er3Ga1.ICSD.76818       | metal      | metal     |
| C1Er3In1.ICSD.76819       | metal      | metal     |
| C1Er3Pb1.ICSD.76822       | metal      | metal     |
| C1Er3Sn1.ICSD.76823       | metal      | metal     |
| C1Er3Ti1.ICSD.76824       | metal      | metal     |
| C1Er5Ge3.ICSD.617665      | metal      | metal     |
| C1Er5Si3.ICSD.617683      | metal      | metal     |
| C1Eu1Rh3.ICSD.76825       | metal      | metal     |
| C1Eu2I3Li1N2.ICSD.170261  | insulator  | insulator |
| C1Eu2N2O2.ICSD.82267      | metal      | insulator |
| C1F1H3O2.ICSD.170925      | insulator  | insulator |
| C1F1H6N1.ICSD.110656      | insulator  | insulator |
| C1F1H7N3O3P1.ICSD.151288  | insulator  | insulator |
| C1F1K1O3Sr1.ICSD.262231   | insulator  | insulator |
| C1F1K3O3.ICSD.66028       | insulator  | insulator |
| C1F1La1N2.ICSD.419916     | metal      | insulator |
| C1F1La1O3.ICSD.26678      | insulator  | insulator |
| C1F1N1S1Sn1.ICSD.2418     | insulator  | insulator |
| C1F1O3Rb1Sr1.ICSD.262233  | insulator  | insulator |
| C1F1O3Rb3.ICSD.66029      | insulator  | insulator |

Supplementary Table 195. Five-fold cross validated predictions for the metal/insulator classification (187/598).

| system                    | calculated | predicted |
|---------------------------|------------|-----------|
| C1F1O3Ti3.ICSD.2515       | insulator  | insulator |
| C1F2Gd2.ICSD.33912        | insulator  | insulator |
| C1F2Ho2.ICSD.71626        | insulator  | insulator |
| C1F2K2O6S2.ICSD.92475     | insulator  | insulator |
| C1F2N1O2P1.ICSD.248121    | insulator  | insulator |
| C1F2Na1O3Yb1.ICSD.172520  | insulator  | insulator |
| C1F2O3Pb2.ICSD.35413      | insulator  | insulator |
| C1F3H1O3S1.ICSD.65782     | insulator  | insulator |
| C1F3H2Na1O4S1.ICSD.151032 | insulator  | insulator |
| C1F3H3O4S1.ICSD.2615      | insulator  | insulator |
| C1F3H5O5S1.ICSD.2007      | insulator  | insulator |
| C1F3Hg1O3S1.ICSD.98942    | insulator  | insulator |
| C1F3I1N2O6.ICSD.78758     | insulator  | insulator |
| C1F3I1.ICSD.73268         | insulator  | insulator |
| C1F3Li1O3S1.ICSD.110018   | insulator  | insulator |
| C1F3O3Rb1S1.ICSD.415817   | insulator  | insulator |
| C1F4H6N3Sb1.ICSD.39318    | insulator  | insulator |
| C1F4.ICSD.66659           | insulator  | insulator |
| C1F5H7N4Zr1.ICSD.281003   | insulator  | insulator |
| C1F5N1S1.ICSD.413757      | insulator  | insulator |
| C1F5N1S2.ICSD.413754      | insulator  | insulator |
| C1F6H6N3P1.ICSD.203170    | insulator  | insulator |
| C1F7I1.ICSD.401706        | insulator  | insulator |
| C1Fe14La2.ICSD.20971      | metal      | metal     |
| C1Fe16Si7U6.ICSD.160155   | metal      | metal     |
| C1Fe1H5O4P1.ICSD.153033   | insulator  | insulator |
| C1Fe1N2.ICSD.419223       | metal      | metal     |
| C1Fe1Na3O7P1.ICSD.77053   | insulator  | insulator |
| C1Fe1O3.ICSD.169791       | insulator  | insulator |
| C1Fe1O3.ICSD.169796       | insulator  | insulator |
| C1Fe2Ho2Si2.ICSD.617751   | metal      | metal     |
| C1Fe2Mo4.ICSD.76135       | metal      | metal     |
| C1Fe2Nd2Si2.ICSD.57048    | metal      | metal     |
| C1Fe2Nd2Si2.ICSD.603157   | metal      | metal     |
| C1Fe2Ni1.ICSD.167127      | metal      | metal     |
| C1Fe2Si1Th1.ICSD.75133    | metal      | metal     |
| C1Fe2Si2Tb2.ICSD.617824   | metal      | metal     |
| C1Fe2Si2Y2.ICSD.617825    | metal      | metal     |
| C1Fe2W2.ICSD.20233        | metal      | metal     |
| C1Fe2.ICSD.162103         | metal      | metal     |
| C1Fe2.ICSD.187138         | metal      | metal     |
| C1Fe2.ICSD.76826          | metal      | metal     |
| C1Fe3Mo3.ICSD.617778      | metal      | metal     |
| C1Fe3Sn1.ICSD.76842       | metal      | metal     |
| C1Fe3V3.ICSD.617880       | metal      | metal     |
| C1Fe3W3.ICSD.76760        | metal      | metal     |
| C1Fe3Zn1.ICSD.76763       | metal      | metal     |
| C1Fe3Zr3.ICSD.617908      | metal      | metal     |
| C1Fe3.ICSD.16593          | metal      | metal     |
| C1Fe3.ICSD.187142         | metal      | metal     |

Supplementary Table 196. Five-fold cross validated predictions for the metal/insulator classification (188/598).

| system                  | calculated | predicted |
|-------------------------|------------|-----------|
| C1Fe3.ICSD_42542        | metal      | metal     |
| C1Fe4.ICSD_187143       | metal      | metal     |
| C1Fe4.ICSD_187144       | metal      | metal     |
| C1Fe4.ICSD_44729        | metal      | metal     |
| C1Fe6W6.ICSD_76761      | metal      | metal     |
| C1Ga1Ho3.ICSD_76843     | metal      | metal     |
| C1Ga1Mn3.ICSD_76845     | metal      | metal     |
| C1Ga1Mo2.ICSD_180615    | metal      | metal     |
| C1Ga1Mo4S8.ICSD_76848   | metal      | metal     |
| C1Ga1N1Si1.ICSD_183047  | insulator  | insulator |
| C1Ga1N5Sr4.ICSD_171166  | insulator  | insulator |
| C1Ga1Nb2.ICSD_167969    | metal      | metal     |
| C1Ga1Nd3.ICSD_76849     | metal      | metal     |
| C1Ga1Pr3.ICSD_76851     | metal      | metal     |
| C1Ga1Pt3.ICSD_617925    | metal      | metal     |
| C1Ga1Sc2.ICSD_160379    | metal      | metal     |
| C1Ga1Sc3.ICSD_50162     | metal      | metal     |
| C1Ga1Ta2.ICSD_617926    | metal      | metal     |
| C1Ga1Ti2.ICSD_419117    | metal      | metal     |
| C1Ga1Tm3.ICSD_76993     | metal      | metal     |
| C1Ga1V2.ICSD_167968     | metal      | metal     |
| C1Ga1Y3.ICSD_56396      | metal      | metal     |
| C1Ga1Yb3.ICSD_56398     | metal      | metal     |
| C1Ga3N3Si1.ICSD_183050  | insulator  | insulator |
| C1Gd1H5O7P1.ICSD_161193 | insulator  | insulator |
| C1Gd1Rh3.ICSD_76997     | metal      | metal     |
| C1Gd2I1.ICSD_68797      | metal      | metal     |
| C1Gd3I3.ICSD_73199      | metal      | metal     |
| C1Gd3In1.ICSD_76994     | metal      | metal     |
| C1Gd3Pb1.ICSD_76996     | metal      | metal     |
| C1Gd3Sn1.ICSD_76998     | metal      | metal     |
| C1Gd3Ti1.ICSD_76999     | metal      | metal     |
| C1Gd5Si3.ICSD_617958    | metal      | metal     |
| C1Ge1H3N1O1.ICSD_201197 | insulator  | insulator |
| C1Ge1Mn3.ICSD_25775     | metal      | metal     |
| C1Ge1Mn3.ICSD_44351     | metal      | metal     |
| C1Ge1Nb2.ICSD_188618    | metal      | metal     |
| C1Ge1Ni3.ICSD_77001     | metal      | metal     |
| C1Ge1Ti2.ICSD_42921     | metal      | metal     |
| C1Ge1V2.ICSD_166031     | metal      | metal     |
| C1Ge1V3.ICSD_617981     | metal      | metal     |
| C1Ge1.ICSD_182363       | insulator  | metal     |
| C1Ge1.ICSD_182364       | metal      | insulator |
| C1Ge3Ho5.ICSD_617965    | metal      | metal     |
| C1Ge3Mo5.ICSD_42922     | metal      | metal     |
| C1Ge3Tb5.ICSD_617974    | metal      | metal     |
| C1Ge3Y5.ICSD_617982     | metal      | metal     |
| C1H1K1N2O2.ICSD_170586  | insulator  | insulator |
| C1H1K1N2.ICSD_401784    | insulator  | insulator |
| C1H1K1O2.ICSD_151294    | insulator  | insulator |

Supplementary Table 197. Five-fold cross validated predictions for the metal/insulator classification (189/598).

| system                   | calculated | predicted |
|--------------------------|------------|-----------|
| C1H1K1O3.ICSD_157166     | insulator  | insulator |
| C1H1K1O3.ICSD_2074       | metal      | insulator |
| C1H1K1O3.ICSD_2075       | metal      | insulator |
| C1H1K1O3.ICSD_2076       | metal      | insulator |
| C1H1K1O3.ICSD_43015      | insulator  | insulator |
| C1H1Li1O2.ICSD_151274    | insulator  | insulator |
| C1H1N1O1Pb1S1.ICSD_79723 | metal      | insulator |
| C1H1N1.ICSD_187644       | insulator  | insulator |
| C1H1N1.ICSD_76418        | insulator  | insulator |
| C1H1N1.ICSD_76419        | insulator  | insulator |
| C1H1N2Na1.ICSD_2495      | insulator  | insulator |
| C1H1Na1O2.ICSD_109643    | insulator  | insulator |
| C1H1Na1O2.ICSD_151256    | insulator  | insulator |
| C1H1Na1O3.ICSD_18183     | insulator  | insulator |
| C1H1Na1O3.ICSD_26933     | insulator  | insulator |
| C1H1O2Rb1.ICSD_172203    | insulator  | insulator |
| C1H1O2Tl1.ICSD_110364    | insulator  | insulator |
| C1H1O2Tl1.ICSD_151295    | insulator  | insulator |
| C1H1O4Y1.ICSD_644        | insulator  | insulator |
| C1H1.ICSD_187642         | insulator  | insulator |
| C1H2N2.ICSD_40446        | insulator  | insulator |
| C1H2Na2O4.ICSD_15959     | insulator  | insulator |
| C1H2Nd1O6P2.ICSD_262900  | metal      | insulator |
| C1H2O2.ICSD_151248       | insulator  | insulator |
| C1H2O6P2Pu1.ICSD_262902  | metal      | insulator |
| C1H3Hg1N3.ICSD_761194    | insulator  | insulator |
| C1H3K1N2O1S1.ICSD_16412  | insulator  | insulator |
| C1H3Li1O3.ICSD_151231    | insulator  | insulator |
| C1H3N1O1Si1.ICSD_201196  | insulator  | insulator |
| C1H3N1O3Zn1.ICSD_41113   | insulator  | insulator |
| C1H3N5O4.ICSD_281338     | insulator  | insulator |
| C1H4Ho2O7.ICSD_62030     | insulator  | insulator |
| C1H4N1Na1O2.ICSD_830     | insulator  | insulator |
| C1H4N2O1.ICSD_151523     | insulator  | insulator |
| C1H4N2O1.ICSD_245371     | insulator  | insulator |
| C1H4N2O2S1.ICSD_165279   | insulator  | insulator |
| C1H4N2S1.ICSD_69145      | insulator  | insulator |
| C1H4N2S1.ICSD_956        | insulator  | insulator |
| C1H4N3Rb1.ICSD_422591    | insulator  | insulator |
| C1H4Na4O9P2.ICSD_19      | insulator  | insulator |
| C1H5N1O2.ICSD_151222     | insulator  | insulator |
| C1H5N1O3.ICSD_158914     | insulator  | insulator |
| C1H5N3O4.ICSD_34697      | insulator  | insulator |
| C1H6N2O2.ICSD_172855     | insulator  | insulator |
| C1H6N2S2.ICSD_421191     | insulator  | insulator |
| C1H6N2S2.ICSD_421192     | insulator  | insulator |
| C1H6N4O1.ICSD_2812       | insulator  | insulator |
| C1H6N4S1.ICSD_42827      | insulator  | insulator |
| C1H7N3O3.ICSD_163085     | insulator  | insulator |
| C1H9N4O4P1.ICSD_163005   | insulator  | insulator |

Supplementary Table 198. Five-fold cross validated predictions for the metal/insulator classification (190/598).

| system                 | calculated | predicted |
|------------------------|------------|-----------|
| C1H9N7O3.ICSD.8100     | insulator  | insulator |
| C1Hf1.ICSD.169399      | metal      | metal     |
| C1Hf1.ICSD.185985      | metal      | metal     |
| C1Hf1.ICSD.185992      | insulator  | metal     |
| C1Hf1.ICSD.618004      | metal      | metal     |
| C1Hf2In1.ICSD.163508   | metal      | metal     |
| C1Hf2Pb1.ICSD.618050   | metal      | metal     |
| C1Hf2S1.ICSD.162461    | metal      | metal     |
| C1Hf2Sn1.ICSD.161073   | metal      | metal     |
| C1Hf2Ti1.ICSD.618061   | metal      | metal     |
| C1Hf3Zn3.ICSD.618069   | metal      | metal     |
| C1Hg1N2.ICSD.411067    | insulator  | insulator |
| C1Hg1N2.ICSD.412278    | insulator  | insulator |
| C1Ho1Rh3.ICSD.77033    | metal      | metal     |
| C1Ho1Ru2Si1.ICSD.50634 | metal      | metal     |
| C1Ho2N2O2.ICSD.416882  | insulator  | insulator |
| C1Ho2N6Si4.ICSD.94032  | insulator  | insulator |
| C1Ho2.ICSD.77029       | metal      | metal     |
| C1Ho3In1.ICSD.77032    | metal      | metal     |
| C1Ho3Sn1.ICSD.77034    | metal      | metal     |
| C1Ho3Ti1.ICSD.77035    | metal      | metal     |
| C1Ho5Si3.ICSD.618104   | metal      | metal     |
| C1I12Zr6.ICSD.60918    | insulator  | metal     |
| C1I1N1.ICSD.77911      | insulator  | insulator |
| C1I4.ICSD.30789        | insulator  | insulator |
| C1I5Y4.ICSD.68014      | metal      | metal     |
| C1In1La3.ICSD.80956    | metal      | metal     |
| C1In1Mn3.ICSD.106306   | metal      | metal     |
| C1In1Mn3.ICSD.657357   | metal      | metal     |
| C1In1Nb2.ICSD.163519   | metal      | metal     |
| C1In1Nd3.ICSD.77037    | metal      | metal     |
| C1In1Nd3.ICSD.98502    | metal      | metal     |
| C1In1Pr3.ICSD.77039    | metal      | metal     |
| C1In1Pt3.ICSD.77040    | metal      | metal     |
| C1In1Sc2.ICSD.163510   | metal      | metal     |
| C1In1Sc3.ICSD.50163    | metal      | metal     |
| C1In1Ta2.ICSD.163509   | metal      | metal     |
| C1In1Tb3.ICSD.77042    | metal      | metal     |
| C1In1Ti2.ICSD.180620   | metal      | metal     |
| C1In1Ti3.ICSD.163844   | metal      | metal     |
| C1In1Tm3.ICSD.77043    | metal      | metal     |
| C1In1V2.ICSD.163505    | metal      | metal     |
| C1In1Y3.ICSD.80955     | metal      | metal     |
| C1In1Yb3.ICSD.56401    | metal      | metal     |
| C1In1Zr2.ICSD.163516   | metal      | metal     |
| C1Ir1.ICSD.169404      | metal      | metal     |
| C1Ir1.ICSD.185983      | metal      | metal     |
| C1Ir1.ICSD.185990      | metal      | metal     |
| C1Ir1.ICSD.185997      | metal      | metal     |
| C1Ir3Sc1.ICSD.77044    | metal      | metal     |

Supplementary Table 199. Five-fold cross validated predictions for the metal/insulator classification (191/598).

| system                   | calculated | predicted |
|--------------------------|------------|-----------|
| C1K1La1O4.ICSD.90735     | metal      | insulator |
| C1K1Li1O3.ICSD.84638     | insulator  | insulator |
| C1K1N1S1.ICSD.65075      | insulator  | insulator |
| C1K1N1.ICSD.173942       | insulator  | insulator |
| C1K1N1.ICSD.27351        | insulator  | insulator |
| C1K1N3O2.ICSD.408287     | insulator  | insulator |
| C1K1N3O6.ICSD.20483      | insulator  | insulator |
| C1K1O5Pu1.ICSD.15685     | insulator  | insulator |
| C1K2N2.ICSD.423580       | insulator  | insulator |
| C1K2O3.ICSD.10191        | insulator  | insulator |
| C1K2O3.ICSD.52535        | insulator  | insulator |
| C1K2O3.ICSD.662          | insulator  | insulator |
| C1K3O8V1.ICSD.60813      | insulator  | insulator |
| C1K4O4.ICSD.245417       | insulator  | insulator |
| C1K4O4.ICSD.245418       | insulator  | insulator |
| C1K4O4.ICSD.245419       | insulator  | insulator |
| C1K4O4.ICSD.245422       | insulator  | insulator |
| C1K4O4.ICSD.245424       | insulator  | insulator |
| C1K4O4.ICSD.245425       | insulator  | insulator |
| C1K4O4.ICSD.245427       | insulator  | insulator |
| C1K4O4.ICSD.245428       | insulator  | insulator |
| C1La1.ICSD.169398        | metal      | metal     |
| C1La2N2O4Si1.ICSD.420943 | insulator  | insulator |
| C1La2O5.ICSD.51468       | insulator  | insulator |
| C1La3Pb1.ICSD.56409      | metal      | metal     |
| C1La3Sn1.ICSD.77049      | metal      | metal     |
| C1La3Ti1.ICSD.56402      | metal      | metal     |
| C1Li1N1.ICSD.77321       | insulator  | insulator |
| C1Li1Na1O3.ICSD.36482    | metal      | insulator |
| C1Li1Na1O3.ICSD.89650    | insulator  | insulator |
| C1Li2N2.ICSD.200369      | insulator  | insulator |
| C1Li2O3.ICSD.66941       | insulator  | insulator |
| C1Li2O3.ICSD.96486       | insulator  | insulator |
| C1Li4O4.ICSD.245388      | insulator  | insulator |
| C1Li4O4.ICSD.245389      | insulator  | insulator |
| C1Li4O4.ICSD.245390      | insulator  | insulator |
| C1Li4O4.ICSD.245395      | insulator  | insulator |
| C1Li4O4.ICSD.245396      | insulator  | insulator |
| C1Li4O4.ICSD.245398      | insulator  | insulator |
| C1Li4O4.ICSD.245401      | insulator  | insulator |
| C1Li4O4.ICSD.245402      | insulator  | insulator |
| C1Li4O4.ICSD.245403      | insulator  | insulator |
| C1Li4O4.ICSD.245405      | insulator  | insulator |
| C1Lu1Rh3.ICSD.77151      | metal      | metal     |
| C1Lu3Sn1.ICSD.56407      | metal      | metal     |
| C1Lu3Ti1.ICSD.56404      | metal      | metal     |
| C1Mg1N2.ICSD.44110       | insulator  | insulator |
| C1Mg1N2.ICSD.75039       | insulator  | insulator |
| C1Mg1Ni3.ICSD.77152      | metal      | metal     |
| C1Mg1O3.ICSD.161821      | insulator  | insulator |

Supplementary Table 200. Five-fold cross validated predictions for the metal/insulator classification (192/598).

| system                   | calculated | predicted |
|--------------------------|------------|-----------|
| C1Mg1O3.ICSD_52150       | insulator  | insulator |
| C1Mg1O3.ICSD_63663       | insulator  | insulator |
| C1Mg3Zn1.ICSD_44855      | metal      | metal     |
| C1Mn1N2.ICSD_170135      | insulator  | insulator |
| C1Mn1Na3O7P1.ICSD_200789 | insulator  | insulator |
| C1Mn1O3.ICSD_28556       | insulator  | insulator |
| C1Mn3Mo3.ICSD_618261     | metal      | metal     |
| C1Mn3Mo3.ICSD_76132      | metal      | metal     |
| C1Mn3Sn1.ICSD_77153      | metal      | metal     |
| C1Mn3W3.ICSD_618280      | metal      | metal     |
| C1Mn3Zn1.ICSD_150829     | metal      | metal     |
| C1Mn3.ICSD_603556        | metal      | metal     |
| C1Mn3.ICSD_618248        | metal      | metal     |
| C1Mn6.ICSD_187037        | metal      | metal     |
| C1Mo1.ICSD_183166        | metal      | metal     |
| C1Mo1.ICSD_43523         | metal      | metal     |
| C1Mo1.ICSD_44987         | metal      | metal     |
| C1Mo1.ICSD_618300        | metal      | metal     |
| C1Mo1.ICSD_618301        | metal      | metal     |
| C1Mo2Pr1Si2.ICSD_409892  | metal      | metal     |
| C1Mo2.ICSD_246146        | metal      | metal     |
| C1Mo2.ICSD_43669         | metal      | metal     |
| C1Mo3Ni3.ICSD_76134      | metal      | metal     |
| C1Mo3Re2.ICSD_618337     | metal      | metal     |
| C1Mo4Ni2.ICSD_76137      | metal      | metal     |
| C1N1Na1O1.ICSD_27138     | insulator  | insulator |
| C1N1Na1S1.ICSD_22273     | insulator  | insulator |
| C1N1Na1.ICSD_77172       | insulator  | insulator |
| C1N1Si1.ICSD_28391       | metal      | insulator |
| C1N1Th1.ICSD_2785        | insulator  | metal     |
| C1N2Na2.ICSD_411341      | insulator  | insulator |
| C1N2Nd2O2.ICSD_82265     | insulator  | insulator |
| C1N2Ni1.ICSD_249388      | insulator  | metal     |
| C1N2O2Pr2.ICSD_82264     | insulator  | insulator |
| C1N2O2Tm2.ICSD_416883    | insulator  | insulator |
| C1N2O2Y2.ICSD_245332     | insulator  | insulator |
| C1N2O2Y2.ICSD_245333     | insulator  | insulator |
| C1N2O2Yb2.ICSD_416884    | metal      | metal     |
| C1N2Pb1.ICSD_16600       | insulator  | insulator |
| C1N2Pb1.ICSD_410915      | insulator  | insulator |
| C1N2Sr1.ICSD_182046      | insulator  | insulator |
| C1N2Sr1.ICSD_59860       | insulator  | insulator |
| C1N2Ti2.ICSD_417297      | insulator  | insulator |
| C1N2Zn1.ICSD_280523      | insulator  | insulator |
| C1N2.ICSD_247676         | insulator  | insulator |
| C1N2.ICSD_247677         | insulator  | insulator |
| C1N2.ICSD_247678         | insulator  | insulator |
| C1N2.ICSD_247679         | insulator  | insulator |
| C1N2.ICSD_247680         | insulator  | insulator |
| C1N3Ta2.ICSD_182350      | metal      | metal     |

Supplementary Table 201. Five-fold cross validated predictions for the metal/insulator classification (193/598).

| system                  | calculated | predicted |
|-------------------------|------------|-----------|
| C1N4S3.ICSD_62269       | insulator  | insulator |
| C1N4Si2.ICSD_93544      | insulator  | insulator |
| C1N4Sr4.ICSD_170798     | insulator  | insulator |
| C1N6O1.ICSD_174516      | insulator  | insulator |
| C1N6Si4Y2.ICSD_155158   | insulator  | insulator |
| C1Na2O3.ICSD_81013      | insulator  | insulator |
| C1Na2O3.ICSD_95549      | insulator  | insulator |
| C1Na2S3.ICSD_73094      | insulator  | insulator |
| C1Na3O7P1Sr1.ICSD_39559 | insulator  | insulator |
| C1Na4O4.ICSD_245406     | insulator  | insulator |
| C1Na4O4.ICSD_245407     | insulator  | insulator |
| C1Na4O4.ICSD_245408     | insulator  | insulator |
| C1Na4O4.ICSD_245410     | insulator  | insulator |
| C1Na4O4.ICSD_245411     | insulator  | insulator |
| C1Na4O4.ICSD_245412     | insulator  | insulator |
| C1Na4O4.ICSD_245414     | insulator  | insulator |
| C1Na4O4.ICSD_245416     | insulator  | insulator |
| C1Nb1Ru3.ICSD_77216     | metal      | metal     |
| C1Nb1.ICSD_183164       | metal      | metal     |
| C1Nb1.ICSD_189090       | metal      | metal     |
| C1Nb1.ICSD_189092       | metal      | metal     |
| C1Nb1.ICSD_189093       | metal      | metal     |
| C1Nb1.ICSD_618481       | metal      | metal     |
| C1Nb2P1.ICSD_43009      | metal      | metal     |
| C1Nb2S1.ICSD_180619     | metal      | metal     |
| C1Nb2S2.ICSD_95110      | metal      | metal     |
| C1Nb2S2.ICSD_95111      | metal      | metal     |
| C1Nb2Sn1.ICSD_618496    | metal      | metal     |
| C1Nb2.ICSD_31973        | metal      | metal     |
| C1Nb2.ICSD_43670        | metal      | metal     |
| C1Nb2.ICSD_653912       | metal      | metal     |
| C1Nb3Ni3.ICSD_618487    | metal      | metal     |
| C1Nb4Ni2.ICSD_618488    | metal      | metal     |
| C1Nb4Rh2.ICSD_618493    | metal      | metal     |
| C1Nb4Zn2.ICSD_42938     | metal      | metal     |
| C1Nd1Rh3.ICSD_77226     | metal      | metal     |
| C1Nd3Pb1.ICSD_77225     | metal      | metal     |
| C1Nd3Sn1.ICSD_77227     | metal      | metal     |
| C1Nd3Ti1.ICSD_77228     | metal      | metal     |
| C1Ni1O3.ICSD_61067      | insulator  | insulator |
| C1Ni1.ICSD_180457       | metal      | metal     |
| C1Ni2Ta4.ICSD_618567    | metal      | metal     |
| C1Ni2W4.ICSD_618587     | metal      | metal     |
| C1Ni3W3.ICSD_166814     | metal      | metal     |
| C1Ni3Zn1.ICSD_77230     | metal      | metal     |
| C1Ni3.ICSD_17005        | metal      | metal     |
| C1Ni6W6.ICSD_618591     | metal      | metal     |
| C1O1S1.ICSD_33540       | insulator  | insulator |
| C1O1.ICSD_26962         | insulator  | insulator |
| C1O1.ICSD_40937         | insulator  | insulator |

Supplementary Table 202. Five-fold cross validated predictions for the metal/insulator classification (194/598).

| system                 | calculated | predicted |
|------------------------|------------|-----------|
| C1O2.ICSD.110775       | insulator  | insulator |
| C1O2.ICSD.110776       | insulator  | insulator |
| C1O2.ICSD.166852       | insulator  | insulator |
| C1O2.ICSD.188892       | insulator  | insulator |
| C1O2.ICSD.188893       | insulator  | insulator |
| C1O2.ICSD.290503       | insulator  | insulator |
| C1O2.ICSD.59378        | insulator  | insulator |
| C1O2.ICSD.98406        | insulator  | insulator |
| C1O2.ICSD.98407        | insulator  | insulator |
| C1O3Pb1.ICSD.247487    | insulator  | insulator |
| C1O3Rb2.ICSD.414122    | insulator  | insulator |
| C1O3Rb2.ICSD.414123    | insulator  | insulator |
| C1O3Sr1.ICSD.27293     | insulator  | insulator |
| C1O3Ti2.ICSD.4239      | insulator  | insulator |
| C1O3Zn1.ICSD.100679    | insulator  | insulator |
| C1O4Pb2.ICSD.91714     | insulator  | insulator |
| C1O4Rb4.ICSD.245429    | insulator  | insulator |
| C1O4Rb4.ICSD.245430    | insulator  | insulator |
| C1O4Rb4.ICSD.245431    | insulator  | insulator |
| C1O4Rb4.ICSD.245433    | insulator  | insulator |
| C1O4Rb4.ICSD.245437    | insulator  | insulator |
| C1O4Rb4.ICSD.245439    | insulator  | insulator |
| C1O4Rb4.ICSD.245440    | insulator  | insulator |
| C1O4Rb4.ICSD.245441    | metal      | insulator |
| C1O4Rb4.ICSD.245442    | insulator  | insulator |
| C1O4Rb4.ICSD.245444    | insulator  | insulator |
| C1O5U1.ICSD.27053      | insulator  | insulator |
| C1O5U1.ICSD.87760      | insulator  | insulator |
| C1O6P1Sn2.ICSD.50969   | insulator  | insulator |
| C1O7Si1Y2.ICSD.88878   | insulator  | insulator |
| C1Os1.ICSD.168277      | insulator  | metal     |
| C1Os1.ICSD.181032      | metal      | metal     |
| C1Os1.ICSD.185982      | metal      | insulator |
| C1Os1.ICSD.185989      | metal      | metal     |
| C1Os1.ICSD.185996      | insulator  | metal     |
| C1Os1.ICSD.43672       | metal      | metal     |
| C1Os2Zr4.ICSD.618619   | metal      | metal     |
| C1P1Ru2Tb1.ICSD.260482 | metal      | metal     |
| C1P1V2.ICSD.181097     | metal      | metal     |
| C1P1V3.ICSD.618621     | metal      | metal     |
| C1P2V4.ICSD.42388      | metal      | metal     |
| C1Pa1.ICSD.618623      | metal      | metal     |
| C1Pb1Pd3.ICSD.108178   | metal      | metal     |
| C1Pb1Pr3.ICSD.77233    | metal      | metal     |
| C1Pb1Pt3.ICSD.77234    | metal      | metal     |
| C1Pb1Sc3.ICSD.77235    | metal      | metal     |
| C1Pb1Tb3.ICSD.77237    | metal      | metal     |
| C1Pb1Ti2.ICSD.42926    | metal      | metal     |
| C1Pb1Tm3.ICSD.56411    | metal      | metal     |
| C1Pb1Y3.ICSD.56408     | metal      | metal     |

Supplementary Table 203. Five-fold cross validated predictions for the metal/insulator classification (195/598).

| system                 | calculated | predicted |
|------------------------|------------|-----------|
| C1Pb1Zr2.ICSD.618634   | metal      | metal     |
| C1Pd1.ICSD.181774      | metal      | metal     |
| C1Pd1.ICSD.183174      | metal      | metal     |
| C1Pd3Sn1.ICSD.618636   | metal      | metal     |
| C1Pr1Rh3.ICSD.77304    | metal      | metal     |
| C1Pr3Sn1.ICSD.77302    | metal      | metal     |
| C1Pr3Ti1.ICSD.77303    | metal      | metal     |
| C1Pt1.ICSD.169405      | metal      | metal     |
| C1Pt1.ICSD.181113      | metal      | metal     |
| C1Pt1.ICSD.185984      | metal      | metal     |
| C1Pt1.ICSD.185991      | metal      | metal     |
| C1Pt3Sn1.ICSD.108179   | metal      | metal     |
| C1Pu1Rh3.ICSD.108181   | metal      | metal     |
| C1Pu1Ru3.ICSD.108183   | metal      | metal     |
| C1Pu1.ICSD.618665      | metal      | metal     |
| C1Re1.ICSD.169402      | metal      | metal     |
| C1Re1.ICSD.185981      | metal      | metal     |
| C1Re1.ICSD.185988      | metal      | metal     |
| C1Re1.ICSD.185995      | metal      | metal     |
| C1Re1.ICSD.618702      | metal      | metal     |
| C1Re2Si1Tb1.ICSD.50632 | metal      | metal     |
| C1Re2W3.ICSD.618714    | metal      | metal     |
| C1Re2.ICSD.180376      | metal      | metal     |
| C1Rh1.ICSD.181773      | metal      | metal     |
| C1Rh1.ICSD.183172      | metal      | metal     |
| C1Rh3Sc1.ICSD.77385    | metal      | metal     |
| C1Rh3Tb1.ICSD.77387    | metal      | metal     |
| C1Rh3Tm1.ICSD.77388    | metal      | metal     |
| C1Rh3Y1.ICSD.77389     | metal      | metal     |
| C1Rh3Yb1.ICSD.77390    | metal      | metal     |
| C1Ru1.ICSD.181771      | insulator  | metal     |
| C1Ru1.ICSD.183169      | metal      | metal     |
| C1Ru1.ICSD.188285      | metal      | metal     |
| C1Ru1.ICSD.43671       | metal      | metal     |
| C1Ru3Sc1.ICSD.77391    | metal      | metal     |
| C1Ru3Ta1.ICSD.77392    | metal      | metal     |
| C1Ru3Th1.ICSD.79241    | metal      | metal     |
| C1Ru3V1.ICSD.77394     | metal      | metal     |
| C1Ru3Zr1.ICSD.77282    | metal      | metal     |
| C1S14.ICSD.26464       | insulator  | insulator |
| C1S1Ti2.ICSD.162459    | metal      | metal     |
| C1S2Ta2.ICSD.23790     | metal      | metal     |
| C1S2Ta2.ICSD.23791     | metal      | metal     |
| C1S2.ICSD.33547        | insulator  | insulator |
| C1S3Ti2.ICSD.420223    | insulator  | insulator |
| C1Sc1.ICSD.181048      | metal      | metal     |
| C1Sc1.ICSD.189086      | metal      | metal     |
| C1Sc1.ICSD.189088      | metal      | metal     |
| C1Sc1.ICSD.43524       | metal      | metal     |
| C1Sc2Ti1.ICSD.160381   | metal      | metal     |

Supplementary Table 204. Five-fold cross validated predictions for the metal/insulator classification (196/598).

| system               | calculated | predicted |
|----------------------|------------|-----------|
| C1Sc2.ICSD.280743    | metal      | metal     |
| C1Sc3Sn1.ICSD.77397  | metal      | metal     |
| C1Sc3Ti1.ICSD.50164  | metal      | metal     |
| C1Se2.ICSD.60374     | insulator  | insulator |
| C1Si1Ti2.ICSD.183359 | metal      | metal     |
| C1Si1.ICSD.107204    | insulator  | insulator |
| C1Si1.ICSD.161173    | insulator  | insulator |
| C1Si1.ICSD.164974    | insulator  | metal     |
| C1Si1.ICSD.18136     | insulator  | insulator |
| C1Si1.ICSD.182362    | metal      | insulator |
| C1Si1.ICSD.24168     | insulator  | insulator |
| C1Si1.ICSD.24169     | insulator  | insulator |
| C1Si1.ICSD.24170     | insulator  | insulator |
| C1Si1.ICSD.24261     | insulator  | insulator |
| C1Si1.ICSD.24630     | insulator  | insulator |
| C1Si1.ICSD.24631     | insulator  | insulator |
| C1Si1.ICSD.27635     | insulator  | insulator |
| C1Si1.ICSD.28303     | insulator  | insulator |
| C1Si1.ICSD.38150     | insulator  | insulator |
| C1Si1.ICSD.42858     | insulator  | insulator |
| C1Si1.ICSD.42859     | insulator  | insulator |
| C1Si1.ICSD.42862     | insulator  | insulator |
| C1Si1.ICSD.43827     | insulator  | insulator |
| C1Si3Tb5.ICSD.618785 | metal      | metal     |
| C1Si3Y5.ICSD.618792  | metal      | metal     |
| C1Si3Yb5.ICSD.618798 | metal      | metal     |
| C1Sn1Tb3.ICSD.77403  | metal      | metal     |
| C1Sn1Ti2.ICSD.161063 | metal      | metal     |
| C1Sn1Tm3.ICSD.77404  | metal      | metal     |
| C1Sn1Y3.ICSD.56405   | metal      | metal     |
| C1Sn1Yb3.ICSD.77405  | metal      | metal     |
| C1Sn1Zr2.ICSD.161068 | metal      | metal     |
| C1Sn1.ICSD.182365    | metal      | metal     |
| C1Sn1.ICSD.182366    | metal      | metal     |
| C1Ta1.ICSD.169400    | metal      | metal     |
| C1Ta1.ICSD.185986    | metal      | metal     |
| C1Ta1.ICSD.185993    | metal      | metal     |
| C1Ta1.ICSD.618830    | metal      | metal     |
| C1Ta2.ICSD.409555    | metal      | metal     |
| C1Tb2.ICSD.42762     | metal      | metal     |
| C1Tb3Ti1.ICSD.77467  | metal      | metal     |
| C1Tc1.ICSD.183167    | metal      | metal     |
| C1Tc1.ICSD.183168    | metal      | metal     |
| C1Th1.ICSD.618904    | metal      | metal     |
| C1Ti1.ICSD.618951    | metal      | metal     |
| C1Ti2Ti1.ICSD.618954 | metal      | metal     |
| C1Ti2.ICSD.77473     | metal      | metal     |
| C1Ti3Ti1.ICSD.163848 | metal      | metal     |
| C1Ti3Zn3.ICSD.42932  | metal      | metal     |
| C1Ti1Tm3.ICSD.77557  | metal      | metal     |

Supplementary Table 205. Five-fold cross validated predictions for the metal/insulator classification (197/598).

| system                | calculated | predicted |
|-----------------------|------------|-----------|
| C1Ti1Y3.ICSD.42923    | metal      | metal     |
| C1Ti1Yb3.ICSD.77558   | metal      | metal     |
| C1Ti1Zr2.ICSD.618976  | metal      | metal     |
| C1Ti1.ICSD.618972     | metal      | metal     |
| C1U1.ICSD.619011      | metal      | metal     |
| C1V1.ICSD.619067      | metal      | metal     |
| C1V2.ICSD.601748      | metal      | metal     |
| C1V3Zr3.ICSD.76130    | metal      | metal     |
| C1W1.ICSD.162417      | metal      | metal     |
| C1W1.ICSD.185987      | metal      | metal     |
| C1W1.ICSD.185994      | metal      | metal     |
| C1W1.ICSD.22258       | metal      | metal     |
| C1W2.ICSD.162419      | metal      | metal     |
| C1W2.ICSD.167897      | metal      | metal     |
| C1W2.ICSD.167898      | metal      | metal     |
| C1Y1.ICSD.181050      | metal      | metal     |
| C1Y1.ICSD.183159      | metal      | metal     |
| C1Y1.ICSD.183160      | metal      | metal     |
| C1Y2.ICSD.96329       | metal      | metal     |
| C1Zn3Zr3.ICSD.42934   | metal      | metal     |
| C1Zr1.ICSD.181142     | metal      | metal     |
| C1Zr1.ICSD.183162     | insulator  | metal     |
| C1Zr1.ICSD.619149     | metal      | metal     |
| C1.ICSD.181083        | metal      | insulator |
| C1.ICSD.182269        | insulator  | metal     |
| C1.ICSD.182760        | insulator  | insulator |
| C1.ICSD.182761        | insulator  | insulator |
| C1.ICSD.186176        | metal      | insulator |
| C1.ICSD.186577        | insulator  | insulator |
| C1.ICSD.187639        | metal      | insulator |
| C1.ICSD.187640        | metal      | metal     |
| C1.ICSD.188336        | metal      | insulator |
| C1.ICSD.28417         | insulator  | insulator |
| C1.ICSD.53780         | insulator  | insulator |
| C1.ICSD.655131        | insulator  | insulator |
| C1.ICSD.66466         | insulator  | insulator |
| C1.ICSD.66467         | insulator  | insulator |
| C1.ICSD.66468         | insulator  | insulator |
| C1.ICSD.66469         | insulator  | insulator |
| C1.ICSD.66470         | insulator  | insulator |
| C1.ICSD.88812         | metal      | insulator |
| C1.ICSD.88813         | metal      | insulator |
| C1.ICSD.88814         | insulator  | insulator |
| C1.ICSD.88815         | metal      | insulator |
| C1.ICSD.88817         | metal      | insulator |
| C1.ICSD.88821         | insulator  | insulator |
| C20.ICSD.185973       | metal      | insulator |
| C22F14.ICSD.411879    | insulator  | insulator |
| C2Ca11N10.ICSD.410862 | insulator  | insulator |
| C2Ca1H2O4.ICSD.151251 | insulator  | insulator |

Supplementary Table 206. Five-fold cross validated predictions for the metal/insulator classification (198/598).

| system                        | calculated | predicted |
|-------------------------------|------------|-----------|
| C2Ca1H2O5.ICSD_153499         | insulator  | insulator |
| C2Ca1H4N2O2S2.ICSD_412784     | insulator  | insulator |
| C2Ca1H4Na2O8.ICSD_9012        | metal      | insulator |
| C2Ca1H6N4O4.ICSD_9201         | insulator  | insulator |
| C2Ca1H6O7.ICSD_77096          | insulator  | insulator |
| C2Ca1H8O6P2.ICSD_261905       | insulator  | insulator |
| C2Ca1K2O6.ICSD_29442          | insulator  | insulator |
| C2Ca1Mg1O6.ICSD_66335         | insulator  | insulator |
| C2Ca1N2S2.ICSD_412783         | insulator  | insulator |
| C2Ca1O4.ICSD_246004           | insulator  | insulator |
| C2Ca1O4.ICSD_246005           | metal      | insulator |
| C2Ca1O6Sr1.ICSD_201461        | insulator  | insulator |
| C2Ca1.ICSD_24074              | insulator  | insulator |
| C2Ca1.ICSD_31092              | insulator  | insulator |
| C2Ca1.ICSD_410313             | insulator  | insulator |
| C2Ca1.ICSD_54184              | insulator  | insulator |
| C2Ca1.ICSD_54188              | insulator  | insulator |
| C2Ca1.ICSD_66663              | insulator  | insulator |
| C2Ca2Cl2H4O6.ICSD_95291       | insulator  | insulator |
| C2Ca2O10Te2.ICSD_4319         | insulator  | insulator |
| C2Cd1Cl2H8N4S2.ICSD_83430     | insulator  | insulator |
| C2Cd1Cl3H8N1.ICSD_110600      | insulator  | insulator |
| C2Cd1Cl4H12N2.ICSD_110649     | insulator  | insulator |
| C2Cd1H2O4.ICSD_151254         | insulator  | insulator |
| C2Cd1N2S2.ICSD_32597          | insulator  | insulator |
| C2Cd1N2.ICSD_20748            | insulator  | insulator |
| C2Cd1O4.ICSD_170029           | insulator  | insulator |
| C2Ce1Co1.ICSD_617336          | metal      | metal     |
| C2Ce1Co1.ICSD_653742          | metal      | metal     |
| C2Ce1Ni1.ICSD_617365          | metal      | metal     |
| C2Ce1Rh1.ICSD_617370          | metal      | metal     |
| C2Ce1Rh1.ICSD_655675          | metal      | metal     |
| C2Ce1.ICSD_617325             | metal      | metal     |
| C2Ce2Cl1.ICSD_422300          | metal      | metal     |
| C2Ce2Re1.ICSD_617368          | metal      | metal     |
| C2Ce2W1.ICSD_417669           | metal      | metal     |
| C2Ce6I10.ICSD_415091          | insulator  | metal     |
| C2Cl10N2Sb2.ICSD_279638       | insulator  | insulator |
| C2Cl10Sc7.ICSD_201849         | metal      | metal     |
| C2Cl1F2H1O1S1.ICSD_417530     | insulator  | insulator |
| C2Cl1H5O1.ICSD_151284         | insulator  | insulator |
| C2Cl1H8N1O1Si1.ICSD_110528    | insulator  | insulator |
| C2Cl1H8N1.ICSD_110601         | insulator  | insulator |
| C2Cl1La2.ICSD_419171          | metal      | metal     |
| C2Cl1Mg1Na3O6.ICSD_4237       | insulator  | insulator |
| C2Cl1N2Ni1Rb1.ICSD_380471     | insulator  | insulator |
| C2Cl2Cu1H8N12.ICSD_162996     | metal      | insulator |
| C2Cl2F1H13O8.ICSD_404343      | insulator  | insulator |
| C2Cl2H10N2Pt1.ICSD_240919     | insulator  | insulator |
| C2Cl2H12N4O4S2Zn1.ICSD_240218 | insulator  | insulator |

Supplementary Table 207. Five-fold cross validated predictions for the metal/insulator classification (199/598).

| system                    | calculated | predicted |
|---------------------------|------------|-----------|
| C2Cl2H4Hg1N4.ICSD_405834  | insulator  | insulator |
| C2Cl2Hg3N4.ICSD_412609    | insulator  | insulator |
| C2Cl2O2Pt1.ICSD_82803     | insulator  | insulator |
| C2Cl2O4Pb2.ICSD_99805     | insulator  | insulator |
| C2Cl3Cu1H8N1.ICSD_400123  | insulator  | insulator |
| C2Cl3H8N1Pd1.ICSD_170106  | insulator  | insulator |
| C2Cl3N3S1.ICSD_86483      | insulator  | insulator |
| C2Cl4Cu1H10N2.ICSD_408537 | insulator  | insulator |
| C2Cl4N3P1.ICSD_81344      | insulator  | insulator |
| C2Cl4S2.ICSD_300291       | insulator  | insulator |
| C2Cl5La4.ICSD_418410      | metal      | metal     |
| C2Cl5Pr4.ICSD_418384      | metal      | metal     |
| C2Cl8N1Nb1.ICSD_402856    | insulator  | insulator |
| C2Cl8O4Sb2.ICSD_109900    | insulator  | insulator |
| C2Co1Dy1.ICSD_78553       | metal      | metal     |
| C2Co1Er1.ICSD_617400      | metal      | metal     |
| C2Co1Gd1.ICSD_617408      | metal      | metal     |
| C2Co1H2N4.ICSD_236414     | insulator  | insulator |
| C2Co1H4O6.ICSD_59927      | insulator  | insulator |
| C2Co1H6N2O3S2.ICSD_87     | insulator  | insulator |
| C2Co1Ho1.ICSD_617411      | metal      | metal     |
| C2Co1La1.ICSD_617416      | insulator  | metal     |
| C2Co1N7Sr6.ICSD_162927    | insulator  | metal     |
| C2Co1Nd1.ICSD_55570       | metal      | metal     |
| C2Co1Nd1.ICSD_67375       | metal      | metal     |
| C2Co1Pr1.ICSD_658525      | metal      | metal     |
| C2Co1Pr1.ICSD_78551       | insulator  | metal     |
| C2Co1Pu1.ICSD_617438      | metal      | metal     |
| C2Co1Sc1.ICSD_62598       | metal      | metal     |
| C2Co1Tb1.ICSD_617452      | metal      | metal     |
| C2Co1Th1.ICSD_601561      | metal      | metal     |
| C2Co1Y1.ICSD_57007        | metal      | metal     |
| C2Co1Yb1.ICSD_617469      | metal      | metal     |
| C2Co3O10Se2.ICSD_56465    | insulator  | insulator |
| C2Cr1Sc1.ICSD_80373       | metal      | metal     |
| C2Cr1U1.ICSD_44493        | metal      | metal     |
| C2Cr2V1.ICSD_20297        | metal      | metal     |
| C2Cr3.ICSD_57009          | metal      | metal     |
| C2Cr3.ICSD_653958         | metal      | metal     |
| C2Cr3.ICSD_76798          | metal      | metal     |
| C2Cs1F6N1O4S2.ICSD_281183 | insulator  | insulator |
| C2Cs1H1O4.ICSD_39364      | insulator  | insulator |
| C2Cs1H1.ICSD_107491       | insulator  | insulator |
| C2Cs1I3N2.ICSD_32521      | insulator  | insulator |
| C2Cs1K1.ICSD_189822       | insulator  | insulator |
| C2Cs1Na1.ICSD_189824      | insulator  | insulator |
| C2Cs1Rb1.ICSD_189823      | insulator  | insulator |
| C2Cs2F4O4Pt1.ICSD_109890  | insulator  | insulator |
| C2Cs2H2O5.ICSD_249314     | insulator  | insulator |
| C2Cs2H4O6.ICSD_39365      | insulator  | insulator |

Supplementary Table 208. Five-fold cross validated predictions for the metal/insulator classification (200/598).

| system                      | calculated | predicted |
|-----------------------------|------------|-----------|
| C2Cs2O4.ICSD.163582         | insulator  | insulator |
| C2Cs2Pd1.ICSD.94396         | insulator  | insulator |
| C2Cs2Pt1.ICSD.94397         | insulator  | insulator |
| C2Cs2.ICSD.51531            | metal      | insulator |
| C2Cs2.ICSD.51533            | insulator  | insulator |
| C2Cs2.ICSD.51534            | insulator  | metal     |
| C2Cu1H6I1Se1.ICSD.174213    | insulator  | insulator |
| C2Cu1H6O7.ICSD.240734       | insulator  | insulator |
| C2Cu1K1N2.ICSD.27923        | insulator  | insulator |
| C2Cu1K1.ICSD.412037         | insulator  | insulator |
| C2Cu1K2O6.ICSD.200779       | insulator  | insulator |
| C2Cu1Na2O6.ICSD.10355       | insulator  | insulator |
| C2Cu1Rb1.ICSD.391118        | insulator  | insulator |
| C2Cu1Rb1.ICSD.412039        | insulator  | insulator |
| C2Cu3H2O8.ICSD.2934         | insulator  | insulator |
| C2Cu4H3N5.ICSD.414512       | insulator  | insulator |
| C2Cu5H8I4N2O4.ICSD.170205   | insulator  | insulator |
| C2Dy1Fe1.ICSD.617582        | metal      | metal     |
| C2Dy1K1O6.ICSD.407227       | insulator  | insulator |
| C2Dy1Mo1.ICSD.617606        | metal      | metal     |
| C2Dy1Ni1.ICSD.80485         | metal      | metal     |
| C2Dy1W1.ICSD.617623         | metal      | metal     |
| C2Dy1.ICSD.42896            | metal      | metal     |
| C2Dy2Re1.ICSD.617615        | metal      | metal     |
| C2Er1Fe1.ICSD.617647        | metal      | metal     |
| C2Er1Mo1.ICSD.617671        | metal      | metal     |
| C2Er1Ni1.ICSD.617680        | metal      | metal     |
| C2Er1W1.ICSD.617691         | metal      | metal     |
| C2Er1.ICSD.617625           | metal      | metal     |
| C2Er2Re1.ICSD.69099         | metal      | metal     |
| C2Er7I12N1.ICSD.401810      | insulator  | insulator |
| C2Eu1N2S2.ICSD.94426        | insulator  | insulator |
| C2Eu1.ICSD.380495           | insulator  | metal     |
| C2Eu1.ICSD.380496           | insulator  | metal     |
| C2Eu1.ICSD.617694           | metal      | metal     |
| C2F1H12N6O3P1.ICSD.151292   | insulator  | insulator |
| C2F1N1O1S1.ICSD.261212      | insulator  | insulator |
| C2F1N1O1S1.ICSD.261213      | insulator  | insulator |
| C2F2O3.ICSD.414408          | insulator  | insulator |
| C2F3Li1N4Pr2.ICSD.419925    | insulator  | insulator |
| C2F4O4S1.ICSD.170271        | insulator  | insulator |
| C2F4Te2.ICSD.73583          | insulator  | insulator |
| C2F5H12N6Sb1.ICSD.79544     | insulator  | insulator |
| C2F5O4Rb1Sb2.ICSD.109634    | insulator  | insulator |
| C2F6Fe1H12O12S2.ICSD.109429 | insulator  | insulator |
| C2F6H12N2Si1.ICSD.110673    | insulator  | insulator |
| C2F6H12N2Si1.ICSD.240237    | insulator  | insulator |
| C2F6H12N6Si1.ICSD.59237     | insulator  | insulator |
| C2F6H12N6Ti1.ICSD.36529     | insulator  | insulator |
| C2F6H12O12S2V1.ICSD.68779   | insulator  | insulator |

Supplementary Table 209. Five-fold cross validated predictions for the metal/insulator classification (201/598).

| system                       | calculated | predicted |
|------------------------------|------------|-----------|
| C2F6H18N8O2Si1.ICSD.280103   | insulator  | insulator |
| C2F6H1N1O4S2.ICSD.81464      | insulator  | insulator |
| C2F6H2N2O6S3.ICSD.59804      | insulator  | insulator |
| C2F6Na2O4Sb2.ICSD.109946     | insulator  | insulator |
| C2F6Na2O4Sb2.ICSD.200225     | insulator  | insulator |
| C2F6O3.ICSD.401780           | insulator  | insulator |
| C2F6Te2.ICSD.401990          | insulator  | insulator |
| C2Fe1H2N4.ICSD.419222        | insulator  | insulator |
| C2Fe1H4O6.ICSD.161344        | insulator  | insulator |
| C2Fe1H6N2O4.ICSD.260020      | insulator  | insulator |
| C2Fe1Ho1.ICSD.617740         | metal      | metal     |
| C2Fe1N7Sr6.ICSD.409974       | metal      | insulator |
| C2Fe1Pu1.ICSD.617815         | metal      | metal     |
| C2Fe1Sc1.ICSD.617820         | metal      | metal     |
| C2Fe1Tb1.ICSD.617852         | metal      | metal     |
| C2Fe1U1.ICSD.109116          | metal      | metal     |
| C2Fe1U1.ICSD.601557          | metal      | metal     |
| C2Fe5.ICSD.181367            | metal      | metal     |
| C2Fe5.ICSD.43194             | metal      | metal     |
| C2Ga2Ge4H10N2O12.ICSD.158855 | insulator  | insulator |
| C2Gd1H7O8S1.ICSD.163610      | insulator  | insulator |
| C2Gd1K1O6.ICSD.407226        | insulator  | insulator |
| C2Gd1Mo1.ICSD.617947         | metal      | metal     |
| C2Gd1Ni1.ICSD.617952         | metal      | metal     |
| C2Gd1Ru1.ICSD.80312          | metal      | metal     |
| C2Gd1.ICSD.617934            | metal      | metal     |
| C2Ge1Ti3.ICSD.180428         | metal      | metal     |
| C2H10N2O5.ICSD.64934         | insulator  | insulator |
| C2H10N4Ni1O6.ICSD.48155      | insulator  | insulator |
| C2H10N8O6S2Zn1.ICSD.170757   | insulator  | insulator |
| C2H12N14O1.ICSD.280660       | insulator  | insulator |
| C2H12N6Ni1S2.ICSD.72515      | insulator  | insulator |
| C2H12N6O8S2Zn1.ICSD.34708    | insulator  | insulator |
| C2H14N4O8Te1.ICSD.203185     | insulator  | insulator |
| C2H18N18.ICSD.280661         | insulator  | insulator |
| C2H1K1N4Ni1S2.ICSD.1732      | insulator  | insulator |
| C2H1K1O4.ICSD.246788         | insulator  | insulator |
| C2H1K5N4.ICSD.409559         | insulator  | insulator |
| C2H1N3.ICSD.240778           | insulator  | insulator |
| C2H2K2O5.ICSD.246782         | insulator  | insulator |
| C2H2K2O6.ICSD.246300         | insulator  | insulator |
| C2H2N2O1.ICSD.30774          | insulator  | insulator |
| C2H2N4Ni1.ICSD.172908        | insulator  | insulator |
| C2H2Na2O6.ICSD.246301        | insulator  | insulator |
| C2H2O4Sr1.ICSD.260441        | insulator  | insulator |
| C2H2O4Sr1.ICSD.260442        | insulator  | insulator |
| C2H2O5Rb2.ICSD.240494        | insulator  | insulator |
| C2H3In1O5.ICSD.249482        | insulator  | insulator |
| C2H3K1O3.ICSD.77115          | insulator  | insulator |
| C2H3K1O4.ICSD.151266         | insulator  | insulator |

Supplementary Table 210. Five-fold cross validated predictions for the metal/insulator classification (202/598).

| system                    | calculated | predicted |
|---------------------------|------------|-----------|
| C2H3Na1O5.ICSD_1296       | insulator  | insulator |
| C2H3O4Rb1.ICSD_151357     | insulator  | insulator |
| C2H4I1N2Na1O2.ICSD_67245  | insulator  | insulator |
| C2H4Mn1O6.ICSD_240902     | insulator  | insulator |
| C2H4Mn2O12P2.ICSD_281672  | insulator  | insulator |
| C2H4Mn4O14P2.ICSD_414680  | metal      | insulator |
| C2H4N2Ni1S4.ICSD_110002   | insulator  | insulator |
| C2H4N4O4.ICSD_172534      | insulator  | insulator |
| C2H4N4.ICSD_281051        | insulator  | insulator |
| C2H4O6V1.ICSD_151270      | insulator  | insulator |
| C2H4O6Zn1.ICSD_56466      | insulator  | insulator |
| C2H5N1O1.ICSD_56913       | insulator  | insulator |
| C2H5N3S2.ICSD_37081       | insulator  | insulator |
| C2H5Na3O8.ICSD_35191      | insulator  | insulator |
| C2H6Hg2O6S2.ICSD_151097   | metal      | insulator |
| C2H6K1N1O4S2.ICSD_281526  | insulator  | insulator |
| C2H6K2N2.ICSD_425116      | metal      | insulator |
| C2H6Mn1O6.ICSD_173098     | insulator  | insulator |
| C2H6N1O4Rb1S2.ICSD_281527 | insulator  | insulator |
| C2H6N2Ni1O4.ICSD_260019   | insulator  | insulator |
| C2H6N2Rb2.ICSD_425117     | insulator  | insulator |
| C2H6N4O1.ICSD_414279      | insulator  | insulator |
| C2H6N4O4Zn1.ICSD_9202     | insulator  | insulator |
| C2H6Ni1O6.ICSD_151342     | insulator  | insulator |
| C2H6O12U2.ICSD_172777     | insulator  | insulator |
| C2H6O1Se1.ICSD_171011     | insulator  | insulator |
| C2H6O4S1.ICSD_171689      | insulator  | insulator |
| C2H6O6S2Zn1.ICSD_109792   | insulator  | insulator |
| C2H6O6S2.ICSD_261156      | insulator  | insulator |
| C2H6O6Zn1.ICSD_151355     | insulator  | insulator |
| C2H6O6.ICSD_246777        | insulator  | insulator |
| C2H6S2.ICSD_249027        | insulator  | insulator |
| C2H6Se2.ICSD_249029       | insulator  | insulator |
| C2H6Te2.ICSD_249030       | insulator  | insulator |
| C2H8I1N1.ICSD_110536      | insulator  | insulator |
| C2H8I3N1Sn1.ICSD_402164   | insulator  | insulator |
| C2H8I3N1.ICSD_110538      | insulator  | insulator |
| C2H8In2O14Se2.ICSD_249780 | insulator  | insulator |
| C2H8N1O2P1S1.ICSD_110565  | insulator  | insulator |
| C2H8N1O4P1.ICSD_110400    | insulator  | insulator |
| C2H8N1O7V3.ICSD_110550    | insulator  | insulator |
| C2H8N2O3.ICSD_240961      | insulator  | insulator |
| C2H8N6O6S2.ICSD_32752     | insulator  | insulator |
| C2H8N6S2Zn1.ICSD_18146    | insulator  | insulator |
| C2H9K1Mg1O10.ICSD_63138   | insulator  | insulator |
| C2H9K1Ni1O10.ICSD_68710   | insulator  | insulator |
| C2H9N3O3.ICSD_163084      | insulator  | insulator |
| C2Hg1I1K1N2.ICSD_18198    | insulator  | insulator |
| C2Hg1N2O2.ICSD_245330     | insulator  | insulator |
| C2Hg1N2S2.ICSD_10304      | insulator  | insulator |

Supplementary Table 211. Five-fold cross validated predictions for the metal/insulator classification (203/598).

| system                  | calculated | predicted |
|-------------------------|------------|-----------|
| C2Hg1N2Se2.ICSD_85760   | insulator  | insulator |
| C2Hg1N2.ICSD_30343      | insulator  | insulator |
| C2Hg1O4.ICSD_56459      | insulator  | insulator |
| C2Hg2N2O1.ICSD_29037    | insulator  | insulator |
| C2Ho1K1O6.ICSD_407223   | insulator  | insulator |
| C2Ho1Mo1.ICSD_618095    | metal      | metal     |
| C2Ho1Ni1.ICSD_658471    | metal      | metal     |
| C2Ho1.ICSD_602551       | metal      | metal     |
| C2I10La6.ICSD_415092    | insulator  | insulator |
| C2I12Pr6Rb1.ICSD_417636 | insulator  | insulator |
| C2I1K1N2.ICSD_40370     | insulator  | insulator |
| C2I2Y2.ICSD_153862      | metal      | metal     |
| C2I2.ICSD_246785        | insulator  | insulator |
| C2I3N2Rb1.ICSD_35411    | insulator  | insulator |
| C2I4O2Pt2.ICSD_68098    | insulator  | insulator |
| C2I7Y6.ICSD_68015       | metal      | metal     |
| C2Ir1U2.ICSD_618138     | metal      | metal     |
| C2Ir1.ICSD_181487       | metal      | metal     |
| C2Ir1.ICSD_181488       | metal      | metal     |
| C2Ir1.ICSD_181489       | metal      | metal     |
| C2Ir1.ICSD_181490       | metal      | metal     |
| C2K1N3.ICSD_411930      | insulator  | insulator |
| C2K1N3.ICSD_411931      | insulator  | insulator |
| C2K1N3.ICSD_411932      | insulator  | insulator |
| C2K1Nd1O6.ICSD_407225   | insulator  | insulator |
| C2K1O6Yb1.ICSD_407224   | insulator  | insulator |
| C2K2Mg1O6.ICSD_31295    | insulator  | insulator |
| C2K2N4O8.ICSD_109049    | insulator  | insulator |
| C2K2O4.ICSD_165561      | insulator  | insulator |
| C2K2O6.ICSD_412335      | insulator  | insulator |
| C2K2Pd1.ICSD_421489     | insulator  | insulator |
| C2K2Pt1.ICSD_421491     | insulator  | insulator |
| C2K2.ICSD_36142         | insulator  | insulator |
| C2K2.ICSD_89528         | insulator  | insulator |
| C2La1Li1N4.ICSD_420440  | insulator  | insulator |
| C2La1Ni1.ICSD_618179    | metal      | metal     |
| C2La1Rh1.ICSD_63063     | metal      | metal     |
| C2La1.ICSD_618168       | metal      | metal     |
| C2La2O2.ICSD_462        | insulator  | insulator |
| C2Li2O4.ICSD_173993     | insulator  | insulator |
| C2Li2.ICSD_89535        | insulator  | insulator |
| C2Lu1Ni1.ICSD_618226    | metal      | metal     |
| C2Lu1.ICSD_74671        | metal      | metal     |
| C2Lu2Re1.ICSD_618232    | metal      | metal     |
| C2Mg1Na2O6.ICSD_100482  | insulator  | insulator |
| C2Mg1.ICSD_88057        | insulator  | insulator |
| C2Mn5.ICSD_618246       | metal      | metal     |
| C2Mo1Nd2.ICSD_417666    | metal      | metal     |
| C2Mo1Pr2.ICSD_413345    | metal      | metal     |
| C2Mo1Tb1.ICSD_618345    | metal      | metal     |

Supplementary Table 212. Five-fold cross validated predictions for the metal/insulator classification (204/598).

| system                | calculated | predicted |
|-----------------------|------------|-----------|
| C2Mo1U1.ICSD.618359   | metal      | metal     |
| C2Mo1Y1.ICSD.618370   | metal      | metal     |
| C2N2Ni1S2.ICSD.31320  | insulator  | insulator |
| C2N2O6S2.ICSD.23342   | insulator  | insulator |
| C2N2Pb1S2.ICSD.143    | insulator  | insulator |
| C2N2S1.ICSD.25520     | insulator  | insulator |
| C2N2S2Se1.ICSD.26610  | insulator  | insulator |
| C2N2S2Sn1.ICSD.201193 | insulator  | insulator |
| C2N2S2Sr1.ICSD.94427  | insulator  | insulator |
| C2N2S2Zn1.ICSD.22359  | insulator  | insulator |
| C2N2S3.ICSD.25505     | insulator  | insulator |
| C2N2S4.ICSD.77184     | insulator  | insulator |
| C2N2S9.ICSD.77442     | insulator  | insulator |
| C2N2Se1.ICSD.173995   | insulator  | insulator |
| C2N2Se1.ICSD.27441    | insulator  | insulator |
| C2N2Se2.ICSD.171332   | insulator  | insulator |
| C2N2Se3.ICSD.171333   | insulator  | insulator |
| C2N2Zn1.ICSD.22392    | insulator  | insulator |
| C2N2.ICSD.15870       | insulator  | insulator |
| C2N3Na1.ICSD.280187   | insulator  | insulator |
| C2N3Rb1.ICSD.411934   | insulator  | insulator |
| C2N3Rb1.ICSD.411935   | insulator  | insulator |
| C2N4S4.ICSD.170226    | insulator  | insulator |
| C2N4Si1.ICSD.93543    | insulator  | insulator |
| C2Na1.ICSD.186177     | metal      | insulator |
| C2Na2O4.ICSD.171459   | insulator  | insulator |
| C2Na2Pd1.ICSD.411388  | insulator  | insulator |
| C2Na2Pt1.ICSD.50173   | insulator  | insulator |
| C2Na2.ICSD.28066      | insulator  | insulator |
| C2Na2.ICSD.95835      | insulator  | insulator |
| C2Nd1Ni1.ICSD.618540  | metal      | metal     |
| C2Nd1Rh1.ICSD.63064   | metal      | metal     |
| C2Nd1.ICSD.63560      | metal      | metal     |
| C2Nd2W1.ICSD.417667   | metal      | metal     |
| C2Ni1Pr1.ICSD.80482   | metal      | metal     |
| C2Ni1Pu1.ICSD.618560  | metal      | metal     |
| C2Ni1Sc1.ICSD.618562  | metal      | metal     |
| C2Ni1Tb1.ICSD.618574  | metal      | metal     |
| C2Ni1Tm1.ICSD.57054   | metal      | metal     |
| C2Ni1U1.ICSD.601562   | metal      | metal     |
| C2Ni1Y1.ICSD.618595   | metal      | metal     |
| C2Ni1Yb1.ICSD.618600  | metal      | metal     |
| C2O4Pb1.ICSD.109830   | insulator  | insulator |
| C2O4Rb2.ICSD.163587   | insulator  | insulator |
| C2O4Rb2.ICSD.165562   | insulator  | insulator |
| C2O4Sn1.ICSD.150101   | insulator  | insulator |
| C2O4Ti2.ICSD.170127   | insulator  | insulator |
| C2O6Rb2.ICSD.412971   | insulator  | insulator |
| C2Os1U2.ICSD.618614   | metal      | metal     |
| C2Os1.ICSD.168279     | metal      | metal     |

Supplementary Table 213. Five-fold cross validated predictions for the metal/insulator classification (205/598).

| system                  | calculated | predicted |
|-------------------------|------------|-----------|
| C2Os1.ICSD.168280       | insulator  | metal     |
| C2Pa1.ICSD.618625       | metal      | metal     |
| C2Pd1Rb2.ICSD.94394     | insulator  | insulator |
| C2Pr1Rh1.ICSD.618649    | metal      | metal     |
| C2Pr1.ICSD.602766       | metal      | metal     |
| C2Pr2Re1.ICSD.69097     | metal      | metal     |
| C2Pr2W1.ICSD.417668     | metal      | metal     |
| C2Pt1Rb2.ICSD.94395     | insulator  | insulator |
| C2Pt1U2.ICSD.618659     | metal      | metal     |
| C2Pu1W1.ICSD.618691     | metal      | metal     |
| C2Rb2.ICSD.51529        | insulator  | insulator |
| C2Re1U1.ICSD.618709     | metal      | metal     |
| C2Re1Y2.ICSD.69098      | metal      | metal     |
| C2Re1.ICSD.184660       | metal      | metal     |
| C2Re1.ICSD.184661       | metal      | metal     |
| C2Re1.ICSD.184662       | metal      | metal     |
| C2Re1.ICSD.184663       | metal      | metal     |
| C2Re1.ICSD.184664       | metal      | metal     |
| C2Rh1U2.ICSD.604010     | metal      | metal     |
| C2Ru1U2.ICSD.603999     | metal      | metal     |
| C2Ru1U2.ICSD.618746     | metal      | metal     |
| C2S2Zr4.ICSD.43674      | metal      | metal     |
| C2Si1Ti3.ICSD.88579     | metal      | metal     |
| C2Si1.ICSD.187720       | metal      | insulator |
| C2Si1.ICSD.187721       | metal      | insulator |
| C2Sn1Ti3.ICSD.160572    | metal      | metal     |
| C2Sr1.ICSD.410317       | insulator  | insulator |
| C2Sr1.ICSD.91051        | insulator  | insulator |
| C2Tb1W1.ICSD.618888     | metal      | metal     |
| C2Tb1.ICSD.618871       | metal      | metal     |
| C2Th1.ICSD.26568        | metal      | metal     |
| C2Th1.ICSD.618912       | metal      | metal     |
| C2Th1.ICSD.77470        | metal      | metal     |
| C2Tm1W1.ICSD.618985     | metal      | metal     |
| C2Tm1.ICSD.23687        | metal      | metal     |
| C2U1V1.ICSD.23742       | metal      | metal     |
| C2U1W1.ICSD.619032      | metal      | metal     |
| C2U1W1.ICSD.681116      | metal      | metal     |
| C2U1.ICSD.168167        | metal      | metal     |
| C2U1.ICSD.604087        | metal      | metal     |
| C2U1.ICSD.619006        | insulator  | metal     |
| C2W1Y1.ICSD.619103      | metal      | metal     |
| C2Y1.ICSD.95963         | metal      | metal     |
| C2Yb1.ICSD.619131       | insulator  | metal     |
| C3Ca2H1Li1.ICSD.188224  | insulator  | insulator |
| C3Ca2K2O9.ICSD.83431    | insulator  | insulator |
| C3Ca2Na2O9.ICSD.36237   | insulator  | insulator |
| C3Ca3Cl2.ICSD.33818     | insulator  | insulator |
| C3Cd1K1N3O3.ICSD.4097   | insulator  | insulator |
| C3Cd1N3Rb1S3.ICSD.14147 | insulator  | insulator |

Supplementary Table 214. Five-fold cross validated predictions for the metal/insulator classification (206/598).

| system                     | calculated | predicted |
|----------------------------|------------|-----------|
| C3Ce1O13P1Sr3.ICSD.76608   | insulator  | insulator |
| C3Ce2F1Na1O9.ICSD.183233   | insulator  | insulator |
| C3Ce2Mo2.ICSD.417827       | metal      | metal     |
| C3Ce2Ni5.ICSD.167515       | metal      | metal     |
| C3Ce2.ICSD.74661           | metal      | metal     |
| C3Cl1H10N1O1.ICSD.110267   | insulator  | insulator |
| C3Cl1H10N1O4.ICSD.110284   | insulator  | insulator |
| C3Cl1H10N1O4.ICSD.110285   | insulator  | insulator |
| C3Cl1H9Si1.ICSD.171369     | insulator  | insulator |
| C3Cl3Cs1O3Os1.ICSD.39588   | insulator  | insulator |
| C3Cl3Ga1H9O1P1.ICSD.173260 | insulator  | insulator |
| C3Cl3H10N1Sn1.ICSD.170096  | insulator  | insulator |
| C3Cl3N3.ICSD.86484         | insulator  | insulator |
| C3Cl5Gd6.ICSD.202547       | metal      | metal     |
| C3Cl6H5O5Ru1Sb1.ICSD.24785 | insulator  | insulator |
| C3Cl7Mo1O1S2.ICSD.413426   | insulator  | insulator |
| C3Co1H3K1O6.ICSD.181922    | insulator  | insulator |
| C3Co1H3K1O6.ICSD.181923    | insulator  | insulator |
| C3Cr1Sc2.ICSD.39202        | metal      | metal     |
| C3Cr2Dy2.ICSD.617492       | metal      | metal     |
| C3Cr2Er2.ICSD.617494       | metal      | metal     |
| C3Cr2Gd2.ICSD.617507       | metal      | metal     |
| C3Cr2Ho2.ICSD.62083        | metal      | metal     |
| C3Cr2N6.ICSD.421391        | insulator  | insulator |
| C3Cr2Tb2.ICSD.617537       | metal      | metal     |
| C3Cr2Y2.ICSD.617562        | metal      | metal     |
| C3Cr2Yb2.ICSD.602482       | metal      | metal     |
| C3Cs1N3Se3.ICSD.4101       | insulator  | insulator |
| C3Cs2O9Sr2.ICSD.169231     | insulator  | insulator |
| C3Cu2H2N3O1Rb1.ICSD.281775 | insulator  | insulator |
| C3Dy2Fe17.ICSD.617591      | metal      | metal     |
| C3Dy2.ICSD.2448            | metal      | metal     |
| C3Er2Fe17.ICSD.617656      | metal      | metal     |
| C3Er2Mo2.ICSD.617669       | metal      | metal     |
| C3Er2.ICSD.86291           | metal      | metal     |
| C3Eu4I3Li1N6.ICSD.170262   | insulator  | insulator |
| C3F1H7N1O5Sn1.ICSD.250206  | insulator  | insulator |
| C3F1La2Na1O9.ICSD.183234   | insulator  | insulator |
| C3F3H12N1.ICSD.110221      | insulator  | insulator |
| C3F3H6N3O2S1.ICSD.152106   | insulator  | insulator |
| C3F6.ICSD.151184           | insulator  | insulator |
| C3Fe17Ho2.ICSD.617748      | metal      | metal     |
| C3Fe17Tb2.ICSD.657171      | metal      | metal     |
| C3Fe17Y2.ICSD.617904       | metal      | metal     |
| C3Fe1N1O4Ti1.ICSD.66317    | insulator  | insulator |
| C3Fe7.ICSD.76830           | metal      | metal     |
| C3Ga1N1Si3.ICSD.183049     | insulator  | insulator |
| C3Gd2Mo2.ICSD.409822       | metal      | metal     |
| C3Gd2.ICSD.602774          | metal      | metal     |
| C3H10I1N1.ICSD.249166      | insulator  | insulator |

Supplementary Table 215. Five-fold cross validated predictions for the metal/insulator classification (207/598).

| system                  | calculated | predicted |
|-------------------------|------------|-----------|
| C3H20N4O10.ICSD.281534  | insulator  | insulator |
| C3H2O4.ICSD.109620      | insulator  | insulator |
| C3H3Nd1O6.ICSD.260292   | metal      | insulator |
| C3H3O6Sc1.ICSD.109661   | insulator  | insulator |
| C3H3O6Sc1.ICSD.281595   | insulator  | insulator |
| C3H3O6Y1.ICSD.109739    | insulator  | insulator |
| C3H5K1N2O5.ICSD.260200  | insulator  | insulator |
| C3H6N1Sb1.ICSD.170722   | insulator  | insulator |
| C3H6N4O3.ICSD.30562     | insulator  | insulator |
| C3H6O3.ICSD.151224      | insulator  | insulator |
| C3H7N3O5.ICSD.80262     | insulator  | insulator |
| C3H8N2O1.ICSD.110759    | metal      | insulator |
| C3H9N3O2.ICSD.109968    | insulator  | insulator |
| C3Hg1K1N3O3.ICSD.100116 | insulator  | insulator |
| C3Hg1K1N3S3.ICSD.20752  | insulator  | insulator |
| C3Hg1K1N3S3.ICSD.85761  | insulator  | insulator |
| C3Hg1N3Rb1S3.ICSD.101   | insulator  | insulator |
| C3Ho2Mo2.ICSD.88511     | metal      | metal     |
| C3Ho2.ICSD.618085       | metal      | metal     |
| C3I6O1Y7.ICSD.67889     | metal      | metal     |
| C3Ir1.ICSD.181492       | metal      | metal     |
| C3Ir5.ICSD.181485       | metal      | metal     |
| C3K4O11U1.ICSD.69130    | insulator  | insulator |
| C3La2Ni5.ICSD.655407    | metal      | metal     |
| C3La2.ICSD.618149       | metal      | metal     |
| C3Lu2N6.ICSD.240311     | insulator  | insulator |
| C3Lu2.ICSD.618221       | metal      | metal     |
| C3Mg2.ICSD.71941        | insulator  | insulator |
| C3Mo2U2.ICSD.618357     | metal      | metal     |
| C3N4.ICSD.246659        | insulator  | insulator |
| C3N4.ICSD.41950         | insulator  | insulator |
| C3N4.ICSD.41952         | insulator  | insulator |
| C3N4.ICSD.83261         | insulator  | insulator |
| C3N4.ICSD.83263         | insulator  | insulator |
| C3N4.ICSD.83265         | insulator  | insulator |
| C3N4.ICSD.97564         | insulator  | insulator |
| C3N6Yb2.ICSD.416892     | metal      | insulator |
| C3Nb4Si1.ICSD.169044    | metal      | metal     |
| C3Nb4.ICSD.42758        | metal      | metal     |
| C3Nb8Zn4.ICSD.108770    | metal      | metal     |
| C3Nd2.ICSD.2447         | metal      | metal     |
| C3O11Ti4U1.ICSD.61345   | insulator  | insulator |
| C3O1S7.ICSD.165374      | insulator  | insulator |
| C3O2.ICSD.411461        | insulator  | insulator |
| C3O9Rb2Sr2.ICSD.169232  | insulator  | insulator |
| C3Os2.ICSD.168275       | insulator  | metal     |
| C3Os2.ICSD.168276       | metal      | insulator |
| C3Pr2.ICSD.2444         | metal      | metal     |
| C3Pr2.ICSD.74662        | metal      | metal     |
| C3Pu2.ICSD.24620        | metal      | metal     |

Supplementary Table 216. Five-fold cross validated predictions for the metal/insulator classification (208/598).

| system                      | calculated | predicted |
|-----------------------------|------------|-----------|
| C3Re2U2.ICSD.618707         | metal      | metal     |
| C3S8.ICSD.53591             | insulator  | insulator |
| C3Sc2.ICSD.77396            | metal      | metal     |
| C3Sc4.ICSD.42760            | insulator  | metal     |
| C3Tb2.ICSD.74663            | metal      | metal     |
| C3Th2.ICSD.618903           | metal      | metal     |
| C3Tm2.ICSD.86292            | metal      | metal     |
| C3U2W2.ICSD.619030          | metal      | metal     |
| C3U2.ICSD.77561             | metal      | metal     |
| C3Y2.ICSD.601153            | metal      | metal     |
| C3Yb2.ICSD.86293            | metal      | metal     |
| C4Ca1Cu1H4O8.ICSD.151315    | insulator  | insulator |
| C4Ca1Mg3O12.ICSD.201729     | insulator  | insulator |
| C4Ca1N6.ICSD.411362         | insulator  | insulator |
| C4Cd1Cl2H8N2.ICSD.162987    | insulator  | insulator |
| C4Cd1H20N2O12S4.ICSD.406374 | insulator  | insulator |
| C4Cd1H4O6.ICSD.249685       | insulator  | insulator |
| C4Cd1H6O2S4.ICSD.110011     | insulator  | insulator |
| C4Cd1H8N6S4.ICSD.170723     | insulator  | insulator |
| C4Cd1Hg1N4S4.ICSD.4102      | insulator  | insulator |
| C4Cd1Hg1N4Se4.ICSD.249203   | insulator  | insulator |
| C4Cd1K2N4.ICSD.23994        | insulator  | insulator |
| C4Cd1N4S4Zn1.ICSD.280039    | insulator  | insulator |
| C4Cd1N4Se4Zn1.ICSD.249202   | insulator  | insulator |
| C4Cd1N6.ICSD.413333         | insulator  | insulator |
| C4Cd1N6.ICSD.413334         | insulator  | insulator |
| C4Cl1N3.ICSD.246790         | insulator  | insulator |
| C4Cl2Cs2N4Pt1.ICSD.421674   | insulator  | insulator |
| C4Cl2Cu1H8N8.ICSD.250269    | metal      | insulator |
| C4Cl2F12N3P2V1.ICSD.68388   | insulator  | insulator |
| C4Cl2F6Te1.ICSD.260283      | insulator  | insulator |
| C4Cl2H12O6V2.ICSD.168381    | insulator  | insulator |
| C4Cl2H16N8Ni1S4.ICSD.61123  | insulator  | insulator |
| C4Cl2K2N4Pt1.ICSD.413704    | insulator  | insulator |
| C4Cl2Mg2Na6O12.ICSD.27790   | insulator  | insulator |
| C4Cl2N4Pt1Rb2.ICSD.419370   | insulator  | insulator |
| C4Cl2O4Os1.ICSD.171560      | insulator  | insulator |
| C4Cl2O4Os1.ICSD.171561      | insulator  | insulator |
| C4Cl3Co1Ga1K1O4.ICSD.410883 | insulator  | insulator |
| C4Cl3Co1O4Sn1.ICSD.69685    | insulator  | insulator |
| C4Cl4Fe1H12N1.ICSD.159487   | insulator  | insulator |
| C4Cl4H12S2Sn1.ICSD.170801   | insulator  | insulator |
| C4Cl4H14N2Sn1.ICSD.170799   | insulator  | insulator |
| C4Cl4N4S4.ICSD.48164        | insulator  | insulator |
| C4Cl6H16N2Sn1.ICSD.110603   | insulator  | insulator |
| C4Cl6H16N2Ti1.ICSD.281532   | insulator  | insulator |
| C4Co1Cs1O4.ICSD.31360       | insulator  | insulator |
| C4Co1F3O4Si1.ICSD.16069     | insulator  | insulator |
| C4Co1H4N2O10V4.ICSD.158983  | metal      | insulator |
| C4Co1Hg1N4S4.ICSD.36062     | insulator  | insulator |

Supplementary Table 217. Five-fold cross validated predictions for the metal/insulator classification (209/598).

| system                      | calculated | predicted |
|-----------------------------|------------|-----------|
| C4Co1Hg1N4Se4.ICSD.172058   | insulator  | insulator |
| C4Co1Li1O4.ICSD.30854       | insulator  | insulator |
| C4Co1N6.ICSD.85618          | insulator  | insulator |
| C4Co1Na1O4.ICSD.30855       | insulator  | insulator |
| C4Co1O4Ti1.ICSD.6011        | insulator  | insulator |
| C4Co1Sc3.ICSD.173167        | metal      | metal     |
| C4Co1Sc3.ICSD.236391        | metal      | metal     |
| C4Cr1H4K1O10.ICSD.172524    | insulator  | insulator |
| C4Cr1H4O10Rb1.ICSD.281565   | insulator  | insulator |
| C4Cr1H8N6S4.ICSD.69067      | insulator  | insulator |
| C4Cr4U1.ICSD.60822          | metal      | metal     |
| C4Cs1H12O14V1.ICSD.109663   | insulator  | insulator |
| C4Cs2H2N4O2Pt1.ICSD.418911  | insulator  | insulator |
| C4Cs2O4.ICSD.154357         | insulator  | insulator |
| C4Cu1H4Na2O10.ICSD.40090    | metal      | insulator |
| C4Cu1H4O8Sr1.ICSD.150120    | insulator  | insulator |
| C4Cu1H8O8.ICSD.170726       | metal      | insulator |
| C4Cu1Hg1N4S4.ICSD.174608    | metal      | insulator |
| C4Cu1K3N4.ICSD.76933        | insulator  | insulator |
| C4Dy4Ni13.ICSD.617613       | metal      | metal     |
| C4Er2Fe1.ICSD.42968         | metal      | metal     |
| C4Er2Mn1.ICSD.73169         | metal      | metal     |
| C4Er3.ICSD.617626           | metal      | metal     |
| C4Er4Ni13.ICSD.617674       | metal      | metal     |
| C4F12Ge4S6.ICSD.62223       | insulator  | insulator |
| C4F12Ge4Se6.ICSD.62224      | insulator  | insulator |
| C4F12H17O20S4V1.ICSD.201678 | insulator  | insulator |
| C4F12N2O8S4Sr1.ICSD.163023  | insulator  | insulator |
| C4F12P4.ICSD.23899          | insulator  | insulator |
| C4F1H12N1O4Os1.ICSD.110743  | insulator  | insulator |
| C4F1H12O5Re1.ICSD.415419    | insulator  | insulator |
| C4F2H13N1.ICSD.155703       | insulator  | insulator |
| C4F3H9Si1.ICSD.162079       | insulator  | insulator |
| C4F6Hg1.ICSD.165635         | insulator  | insulator |
| C4F6Hg2O4.ICSD.2022         | insulator  | insulator |
| C4Fe1H12N10S4.ICSD.170705   | insulator  | insulator |
| C4Fe1H12O6S4.ICSD.203234    | insulator  | insulator |
| C4Fe1Hg1N4S4.ICSD.87888     | insulator  | insulator |
| C4Fe1Ho2.ICSD.617747        | metal      | metal     |
| C4Fe1K2O4.ICSD.200025       | insulator  | insulator |
| C4Fe1Lu2.ICSD.617765        | metal      | metal     |
| C4Fe1Sc3.ICSD.72863         | metal      | metal     |
| C4Fe1Tb2.ICSD.617861        | metal      | metal     |
| C4Fe1Y2.ICSD.617900         | metal      | metal     |
| C4Fe1Yb2.ICSD.617906        | metal      | metal     |
| C4Fe2H2O6.ICSD.109774       | insulator  | insulator |
| C4H10N8Ni1S2.ICSD.110013    | insulator  | insulator |
| C4H11N1O10.ICSD.249174      | insulator  | insulator |
| C4H12I1N1O3.ICSD.416527     | insulator  | insulator |
| C4H12I1N1.ICSD.55080        | insulator  | insulator |

Supplementary Table 218. Five-fold cross validated predictions for the metal/insulator classification (210/598).

| system                       | calculated | predicted |
|------------------------------|------------|-----------|
| C4H12I3O2S2Ti1_ICSD_170738   | insulator  | insulator |
| C4H12Mn1N10_ICSD_110766      | insulator  | insulator |
| C4H12N2O2Se1_ICSD_402259     | insulator  | insulator |
| C4H12N2O2_ICSD_150985        | insulator  | insulator |
| C4H12O3P2_ICSD_170836        | insulator  | insulator |
| C4H12O4Si1_ICSD_171152       | insulator  | insulator |
| C4H1O4Rb1_ICSD_172323        | insulator  | insulator |
| C4H20N4Ni1O12Pd1_ICSD_417562 | insulator  | insulator |
| C4H20N4O12Pd1Zn1_ICSD_417563 | insulator  | insulator |
| C4H20N4O12Pt1Zn1_ICSD_417565 | insulator  | insulator |
| C4H2O4_ICSD_151146           | insulator  | insulator |
| C4H2O6Sn2_ICSD_96547         | insulator  | insulator |
| C4H4Mo2O8_ICSD_151313        | insulator  | insulator |
| C4H4N4O2Pt1_ICSD_409975      | insulator  | insulator |
| C4H4N4_ICSD_170078           | insulator  | insulator |
| C4H4Na5O14Sc1_ICSD_411988    | insulator  | insulator |
| C4H5Na3O8_ICSD_109935        | insulator  | insulator |
| C4H6Hg1N4O2_ICSD_418607      | insulator  | insulator |
| C4H6N2S2Sn1_ICSD_171668      | insulator  | insulator |
| C4H6O7Sr1_ICSD_109771        | insulator  | insulator |
| C4H7O11Y1_ICSD_109808        | insulator  | insulator |
| C4H8I4Sn1_ICSD_110024        | insulator  | insulator |
| C4H8Mg1N6O4_ICSD_414648      | insulator  | insulator |
| C4H8N1O10Ti1_ICSD_109869     | metal      | insulator |
| C4H8N2O4_ICSD_172054         | insulator  | insulator |
| C4H8O4Sn1_ICSD_151276        | insulator  | insulator |
| C4H8O8Zn1_ICSD_109772        | insulator  | insulator |
| C4H9N1O6Zn1_ICSD_240733      | insulator  | insulator |
| C4H9N1Se2_ICSD_163646        | insulator  | insulator |
| C4Hg1K2N4_ICSD_62084         | insulator  | insulator |
| C4Hg1Mn1N4S4_ICSD_87889      | insulator  | insulator |
| C4Hg1Mn1N4Se4_ICSD_240722    | insulator  | insulator |
| C4Hg1N4Rb2_ICSD_100685       | insulator  | insulator |
| C4Hg1N4S4Zn1_ICSD_280028     | insulator  | insulator |
| C4Hg1N4Se4Zn1_ICSD_188764    | insulator  | insulator |
| C4Ho3_ICSD_618074            | metal      | metal     |
| C4Ho4Ni13_ICSD_618100        | metal      | metal     |
| C4I15La10_ICSD_415094        | metal      | insulator |
| C4I2K2N4Pt1_ICSD_413706      | insulator  | insulator |
| C4I2N4Pt1Rb2_ICSD_421673     | insulator  | insulator |
| C4I2O4Ru1_ICSD_23919         | insulator  | insulator |
| C4Ir1Sc3_ICSD_415137         | metal      | metal     |
| C4Ir1Sc3_ICSD_657402         | metal      | metal     |
| C4Ir1_ICSD_181493            | metal      | metal     |
| C4Ir1_ICSD_181496            | metal      | metal     |
| C4Ir1_ICSD_181497            | metal      | metal     |
| C4Ir1_ICSD_181498            | metal      | metal     |
| C4K1N3_ICSD_77046            | insulator  | insulator |
| C4K1N4Ti1_ICSD_170125        | insulator  | insulator |
| C4K2N4Ni1_ICSD_24099         | insulator  | insulator |

Supplementary Table 219. Five-fold cross validated predictions for the metal/insulator classification (211/598).

| system                    | calculated | predicted |
|---------------------------|------------|-----------|
| C4K2N4Pd1S4_ICSD_9473     | insulator  | insulator |
| C4K2N4Pd1_ICSD_413899     | insulator  | insulator |
| C4K2N4Pt1_ICSD_413898     | insulator  | insulator |
| C4K2N4Zn1_ICSD_23993      | insulator  | insulator |
| C4La1N8Rb1Si1_ICSD_419337 | insulator  | insulator |
| C4Li2O4_ICSD_154354       | insulator  | insulator |
| C4Mg1N6_ICSD_411361       | insulator  | insulator |
| C4Mg2Na6O16S1_ICSD_158962 | insulator  | insulator |
| C4Mg2Na6O16S1_ICSD_27792  | insulator  | insulator |
| C4Mn1N1O5_ICSD_15221      | insulator  | insulator |
| C4Mn1N6_ICSD_92075        | insulator  | insulator |
| C4N3Na1_ICSD_31926        | insulator  | insulator |
| C4N4Ni1Ti2_ICSD_249564    | insulator  | insulator |
| C4N4Ni1Zn1_ICSD_169760    | insulator  | insulator |
| C4N4Pd1Ti2_ICSD_249565    | insulator  | insulator |
| C4N4Pd1Zn1_ICSD_169759    | insulator  | insulator |
| C4N4Pt1Rb2_ICSD_171492    | insulator  | insulator |
| C4N4Pt1Ti2_ICSD_202570    | insulator  | insulator |
| C4N4Pt1Zn1_ICSD_169758    | insulator  | insulator |
| C4N6Ni1_ICSD_85617        | insulator  | insulator |
| C4N6Pb1_ICSD_412288       | insulator  | insulator |
| C4N6Sr1_ICSD_411363       | insulator  | insulator |
| C4Na2O4_ICSD_154355       | insulator  | insulator |
| C4Na2O8Sn1_ICSD_388       | insulator  | insulator |
| C4Ni13Tb4_ICSD_618575     | metal      | metal     |
| C4Ni13Y4_ICSD_618594      | metal      | metal     |
| C4Ni13Yb4_ICSD_618599     | metal      | metal     |
| C4Ni1O4_ICSD_74196        | insulator  | insulator |
| C4Ni1Sc3_ICSD_657399      | metal      | metal     |
| C4O4Pb1_ICSD_248144       | insulator  | insulator |
| C4O4Rb2_ICSD_154356       | insulator  | insulator |
| C4O4Ru1_ICSD_72577        | insulator  | insulator |
| C4O4Ti2_ICSD_260404       | insulator  | insulator |
| C4Os1Sc3_ICSD_420075      | metal      | metal     |
| C4Os1Sc3_ICSD_420076      | metal      | metal     |
| C4Os1Sc3_ICSD_657401      | metal      | metal     |
| C4Rh1Sc3_ICSD_415136      | metal      | metal     |
| C4Rh1Sc3_ICSD_657400      | metal      | metal     |
| C4Ru1Sc3_ICSD_420074      | metal      | metal     |
| C4Ru1Sc3_ICSD_72864       | metal      | metal     |
| C4Sc3_ICSD_71145          | metal      | metal     |
| C4U1W4_ICSD_42959         | metal      | metal     |
| C4Y3_ICSD_619109          | metal      | metal     |
| C5Ca4Ni3_ICSD_71440       | metal      | metal     |
| C5Cd1Fe1N6O1_ICSD_109420  | insulator  | insulator |
| C5Cl1Mn1O5_ICSD_16135     | insulator  | insulator |
| C5Cl1O5Re1_ICSD_35625     | insulator  | insulator |
| C5Cl1O5Te1_ICSD_167772    | insulator  | insulator |
| C5Cu1Fe1N6O1_ICSD_414021  | insulator  | insulator |
| C5Cu1H11N1O6_ICSD_110500  | metal      | insulator |

Supplementary Table 220. Five-fold cross validated predictions for the metal/insulator classification (212/598).

| system                      | calculated | predicted |
|-----------------------------|------------|-----------|
| C5Cu2H8N4.ICSD.281777       | insulator  | insulator |
| C5Dy1H9N2O8.ICSD.151327     | insulator  | insulator |
| C5Er1H9N2O8.ICSD.151326     | insulator  | insulator |
| C5Fe1H8N6O4.ICSD.83731      | insulator  | insulator |
| C5Fe1N6O1Ti2.ICSD.14184     | insulator  | insulator |
| C5Fe1O5.ICSD.23918          | insulator  | insulator |
| C5Fe1O5.ICSD.300118         | insulator  | insulator |
| C5H10O5.ICSD.151281         | insulator  | insulator |
| C5H12N2O1.ICSD.150997       | insulator  | insulator |
| C5Ho4.ICSD.84871            | metal      | metal     |
| C5I1Mn1O5.ICSD.71878        | insulator  | insulator |
| C5I1O5Re1.ICSD.71219        | insulator  | insulator |
| C5I1O5Te1.ICSD.85335        | insulator  | insulator |
| C5Ir4.ICSD.181486           | insulator  | metal     |
| C5N4.ICSD.2130              | insulator  | insulator |
| C5Nb6.ICSD.167353           | metal      | metal     |
| C5Ni2Yb4.ICSD.73156         | metal      | metal     |
| C5Ru6Th2.ICSD.39204         | metal      | metal     |
| C5Tb4.ICSD.84870            | metal      | metal     |
| C5Ti8.ICSD.20822            | metal      | metal     |
| C5V6.ICSD.71098             | metal      | metal     |
| C5Y4.ICSD.84869             | metal      | metal     |
| C60Eu6.ICSD.88616           | metal      | metal     |
| C60K6.ICSD.66879            | insulator  | insulator |
| C60Rb6.ICSD.66880           | insulator  | insulator |
| C60Sr3.ICSD.75354           | insulator  | metal     |
| C60Sr6.ICSD.75356           | metal      | insulator |
| C60.ICSD.74523              | insulator  | insulator |
| C60.ICSD.95370              | insulator  | insulator |
| C60.ICSD.96620              | insulator  | insulator |
| C68Co2O8.ICSD.166882        | insulator  | insulator |
| C6Ca2Cu1H6O12.ICSD.151316   | metal      | insulator |
| C6Cd1Cs2Fe1N6.ICSD.151696   | insulator  | insulator |
| C6Cd1N6Pd1.ICSD.6093        | insulator  | insulator |
| C6Cd2Fe1N6.ICSD.417826      | insulator  | insulator |
| C6Cd2N6Os1.ICSD.417821      | insulator  | insulator |
| C6Cd2N6Ru1.ICSD.417822      | insulator  | insulator |
| C6Cl2H18N4S2Se2.ICSD.151024 | insulator  | insulator |
| C6Cl3H21N2.ICSD.402690      | insulator  | insulator |
| C6Cl4La6.ICSD.416906        | metal      | metal     |
| C6Cl6H16O14Ru3.ICSD.413219  | insulator  | insulator |
| C6Co1Cr1H18N12.ICSD.806     | metal      | insulator |
| C6Co1Cs2Li1N6.ICSD.60539    | insulator  | insulator |
| C6Co1Cs2N6Rb1.ICSD.411128   | insulator  | insulator |
| C6Co1Er1H8N6O4.ICSD.171622  | insulator  | insulator |
| C6Co1Er1N6.ICSD.171616      | insulator  | insulator |
| C6Co1Fe1H18N12.ICSD.411630  | insulator  | metal     |
| C6Co1Fe1K2N6.ICSD.28669     | metal      | insulator |
| C6Co1H3N6.ICSD.28502        | insulator  | insulator |
| C6Co1K3N6.ICSD.23048        | insulator  | insulator |

Supplementary Table 221. Five-fold cross validated predictions for the metal/insulator classification (213/598).

| system                      | calculated | predicted |
|-----------------------------|------------|-----------|
| C6Co1Li1N6Rb2.ICSD.83393    | insulator  | insulator |
| C6Co2Fe1N6.ICSD.28670       | metal      | metal     |
| C6Co2H18N12.ICSD.2561       | insulator  | insulator |
| C6Cr1Cs2Li1N6.ICSD.68068    | insulator  | insulator |
| C6Cr1O6.ICSD.8286           | insulator  | insulator |
| C6Cr21Mo2.ICSD.156148       | metal      | metal     |
| C6Cr21W2.ICSD.156149        | metal      | metal     |
| C6Cr23.ICSD.154719          | metal      | metal     |
| C6Cr23.ICSD.181714          | metal      | metal     |
| C6Cr3W20.ICSD.617559        | metal      | metal     |
| C6Cs2Fe1Li1N6.ICSD.1001     | metal      | insulator |
| C6Cs2Fe1Li1N6.ICSD.60542    | insulator  | insulator |
| C6Cs2Fe1N6Ni1.ICSD.151706   | insulator  | insulator |
| C6Cs2Ir1Li1N6.ICSD.9032     | insulator  | insulator |
| C6Cs2N9Na1.ICSD.407809      | insulator  | insulator |
| C6Cu1Fe1K2N6.ICSD.28654     | insulator  | insulator |
| C6Cu1Fe1K2N6.ICSD.99499     | insulator  | insulator |
| C6Cu1Fe1Li2N6.ICSD.28656    | insulator  | insulator |
| C6Cu1Fe1N6Na2.ICSD.28657    | insulator  | insulator |
| C6Cu1Fe1N6Rb2.ICSD.28659    | insulator  | insulator |
| C6Cu1H4N8O4.ICSD.168724     | metal      | insulator |
| C6Cu1H8N6O2.ICSD.156682     | metal      | metal     |
| C6Cu2F6O6.ICSD.260351       | insulator  | insulator |
| C6Cu2Fe1N6.ICSD.28653       | metal      | insulator |
| C6Dy12I17.ICSD.416955       | metal      | insulator |
| C6Er11Ni60.ICSD.617678      | metal      | metal     |
| C6Eu1N9.ICSD.391267         | insulator  | insulator |
| C6Eu1.ICSD.169041           | metal      | metal     |
| C6F12Fe1O6Sb2.ICSD.280005   | insulator  | insulator |
| C6F12O6Os1Sb2.ICSD.152388   | insulator  | insulator |
| C6F12O6Ru1Sb2.ICSD.152386   | insulator  | insulator |
| C6F5H3O3Se1.ICSD.410719     | insulator  | insulator |
| C6F6H24N2O2Sn1.ICSD.110229  | insulator  | insulator |
| C6F6Na4O12Sn4.ICSD.109824   | insulator  | insulator |
| C6Fe1H4N6.ICSD.30559        | insulator  | insulator |
| C6Fe1K2N6Ni1.ICSD.28667     | insulator  | insulator |
| C6Fe1K3N6.ICSD.31883        | insulator  | insulator |
| C6Fe1Mn2N6.ICSD.417824      | insulator  | insulator |
| C6Fe1N6Ni2.ICSD.28668       | metal      | insulator |
| C6Fe1N6Pb2.ICSD.51493       | insulator  | insulator |
| C6Fe1N6Sn2.ICSD.51494       | insulator  | insulator |
| C6Fe21Mo2.ICSD.156150       | metal      | metal     |
| C6Fe21W2.ICSD.156151        | metal      | metal     |
| C6Fe23.ICSD.168294          | metal      | metal     |
| C6Fe23.ICSD.187035          | metal      | metal     |
| C6Gd1N9.ICSD.416002         | insulator  | insulator |
| C6Gd3Mn2.ICSD.73213         | metal      | metal     |
| C6H12N10O2S2Zn1.ICSD.405377 | insulator  | insulator |
| C6H12N6O8Pt1.ICSD.281359    | insulator  | insulator |
| C6H18I2Pb2.ICSD.405865      | insulator  | insulator |

Supplementary Table 222. Five-fold cross validated predictions for the metal/insulator classification (214/598).

| system                        | calculated | predicted |
|-------------------------------|------------|-----------|
| C6H18N3O1P1.ICSD_409222       | insulator  | insulator |
| C6H20N2S6.ICSD_110278         | insulator  | insulator |
| C6H8Ho1K1N6O4Ru1.ICSD_281332  | insulator  | insulator |
| C6I4O6Os2.ICSD_68901          | insulator  | insulator |
| C6K3Mn1N6.ICSD_24933          | insulator  | insulator |
| C6La1N9.ICSD_391272           | insulator  | insulator |
| C6Mn20Mo3.ICSD_618260         | metal      | metal     |
| C6Mn20W3.ICSD_618279          | metal      | metal     |
| C6Mn23.ICSD_154720            | metal      | metal     |
| C6Mn2N6Os1.ICSD_417825        | insulator  | insulator |
| C6Mn2N6Ru1.ICSD_417823        | insulator  | insulator |
| C6Mn2Tb3.ICSD_73214           | metal      | metal     |
| C6Mo1O6.ICSD_30809            | insulator  | insulator |
| C6N9Nd1.ICSD_391269           | insulator  | insulator |
| C6N9Pr1.ICSD_391270           | insulator  | insulator |
| C6Na2O6.ICSD_170805           | insulator  | insulator |
| C6O6W1.ICSD_300206            | insulator  | insulator |
| C6O8T14.ICSD_260372           | insulator  | insulator |
| C6Yb1.ICSD_601565             | metal      | metal     |
| C7Ho4.ICSD_74817              | insulator  | metal     |
| C7Ho4.ICSD_83381              | metal      | metal     |
| C7Ir3.ICSD_181491             | metal      | metal     |
| C7Lu4.ICSD_83382              | metal      | metal     |
| C7Lu5Re2.ICSD_406416          | metal      | metal     |
| C7Re2Sc5.ICSD_72382           | metal      | metal     |
| C7V8.ICSD_22177               | metal      | metal     |
| C7Y4.ICSD_86049               | metal      | metal     |
| C8Ca1H16K2O24Zr1.ICSD_245276  | insulator  | insulator |
| C8Cd1H10O12.ICSD_249683       | insulator  | insulator |
| C8Cl1H20Li1O4.ICSD_151063     | insulator  | insulator |
| C8Cl4H24N2Pd1.ICSD_59900      | insulator  | insulator |
| C8Cl5La8.ICSD_419172          | metal      | metal     |
| C8Co1H24Li1N8O12.ICSD_110738  | insulator  | insulator |
| C8Co2O8.ICSD_16567            | insulator  | insulator |
| C8Cs1.ICSD_74641              | metal      | insulator |
| C8Cu1H16N8Ni1.ICSD_411632     | metal      | insulator |
| C8Cu3H8Na2O16.ICSD_171669     | insulator  | insulator |
| C8F12O8Ru2.ICSD_171336        | insulator  | insulator |
| C8F12Pt1S4.ICSD_165606        | insulator  | insulator |
| C8F6H24N2Os1.ICSD_151185      | metal      | insulator |
| C8Ga2H26N4.ICSD_163002        | insulator  | insulator |
| C8Ge2H24In1P1.ICSD_163057     | insulator  | insulator |
| C8H16Hg1N6S2.ICSD_260899      | insulator  | insulator |
| C8H24Mn1N2Se10Sn4.ICSD_249783 | insulator  | insulator |
| C8H24N2O4S1.ICSD_52027        | insulator  | insulator |
| C8H4K2Ni1O6S4.ICSD_165299     | insulator  | insulator |
| C8I2Mo2O8.ICSD_36             | insulator  | insulator |
| C8K1O8Y1.ICSD_170216          | insulator  | insulator |
| C8K1.ICSD_70020               | metal      | metal     |
| C8K5N8Nb1.ICSD_16458          | insulator  | insulator |

Supplementary Table 223. Five-fold cross validated predictions for the metal/insulator classification (215/598).

| system                      | calculated | predicted |
|-----------------------------|------------|-----------|
| C8O4Se2.ICSD_172229         | insulator  | insulator |
| C8Rb1.ICSD_200563           | metal      | metal     |
| C8Re3U5.ICSD_65202          | metal      | metal     |
| C8.ICSD_20351               | insulator  | insulator |
| C9Fe2O9.ICSD_31030          | insulator  | insulator |
| C9La7Os4.ICSD_419389        | metal      | metal     |
| Ca10.7184.ICSD_163531       | metal      | metal     |
| Ca10Li1Mg1Sb9.ICSD_171161   | insulator  | insulator |
| Ca10O24P6Se1.ICSD_410781    | insulator  | insulator |
| Ca10O25P6.ICSD_87727        | insulator  | insulator |
| Ca11Ga7.ICSD_58896          | metal      | metal     |
| Ca11N8.ICSD_23208           | metal      | insulator |
| Ca11Sb10.ICSD_433           | metal      | insulator |
| Ca12Li6Mo4N16O3.ICSD_83865  | insulator  | insulator |
| Ca12Li6N16O3Re4.ICSD_411462 | metal      | insulator |
| Ca12Li6N16O3W4.ICSD_83866   | insulator  | insulator |
| Ca14Si19.ICSD_78963         | insulator  | metal     |
| Ca17Hg9Li6.ICSD_420846      | metal      | metal     |
| Ca19In8N7.ICSD_155929       | metal      | metal     |
| Ca1Cd1Ge1.ICSD_52750        | metal      | metal     |
| Ca1Cd1Pb1.ICSD_58877        | metal      | metal     |
| Ca1Cd1Sn1.ICSD_58878        | metal      | metal     |
| Ca1Cd1.ICSD_619188          | metal      | metal     |
| Ca1Cd2Cu9.ICSD_424134       | metal      | metal     |
| Ca1Cd2P2.ICSD_100063        | insulator  | insulator |
| Ca1Cd2Pd1.ICSD_425509       | metal      | metal     |
| Ca1Cd2Sb2.ICSD_12151        | insulator  | insulator |
| Ca1Cd2.ICSD_420576          | metal      | metal     |
| Ca1Cd2.ICSD_619190          | metal      | metal     |
| Ca1Cl1F1.ICSD_1130          | insulator  | insulator |
| Ca1Cl1Fe1O2.ICSD_69869      | insulator  | insulator |
| Ca1Cl1Fe1O2.ICSD_96556      | insulator  | insulator |
| Ca1Cl1H1O1.ICSD_24403       | insulator  | insulator |
| Ca1Cl1H1.ICSD_25601         | insulator  | insulator |
| Ca1Cl2H12O6.ICSD_59142      | insulator  | insulator |
| Ca1Cl2H4O2.ICSD_960         | insulator  | insulator |
| Ca1Cl2H8O4.ICSD_16484       | insulator  | insulator |
| Ca1Cl2H8O4.ICSD_8061        | insulator  | insulator |
| Ca1Cl2O4.ICSD_171020        | insulator  | insulator |
| Ca1Cl2.ICSD_51238           | insulator  | insulator |
| Ca1Cl2.ICSD_56421           | insulator  | insulator |
| Ca1Cl2.ICSD_56769           | insulator  | insulator |
| Ca1Cl2.ICSD_86209           | insulator  | insulator |
| Ca1Cl6H24Mg2O12.ICSD_16326  | insulator  | insulator |
| Ca1Co1F6Li1.ICSD_32730      | insulator  | insulator |
| Ca1Co1O6Si2.ICSD_159546     | insulator  | insulator |
| Ca1Co1O7P2.ICSD_202852      | insulator  | insulator |
| Ca1Co2Ge2.ICSD_406          | metal      | metal     |
| Ca1Co2O4.ICSD_245715        | metal      | metal     |
| Ca1Co2P2.ICSD_10462         | metal      | metal     |

Supplementary Table 224. Five-fold cross validated predictions for the metal/insulator classification (216/598).

| system                      | calculated | predicted |
|-----------------------------|------------|-----------|
| Ca1Co2Si2_ICSD_420974       | metal      | metal     |
| Ca1Co3O14P4_ICSD_74047      | insulator  | insulator |
| Ca1Co4Cu3O12_ICSD_169095    | metal      | metal     |
| Ca1Cr1F5_ICSD_10286         | insulator  | insulator |
| Ca1Cr1F5_ICSD_23174         | insulator  | insulator |
| Ca1Cr1F6Li1_ICSD_73985      | insulator  | insulator |
| Ca1Cr1F6_ICSD_10343         | insulator  | insulator |
| Ca1Cr1O10Si4_ICSD_83465     | insulator  | insulator |
| Ca1Cr1O4_ICSD_30283         | insulator  | insulator |
| Ca1Cr1O7P2_ICSD_411743      | insulator  | insulator |
| Ca1Cr2Cu3O12Sb2_ICSD_152283 | metal      | insulator |
| Ca1Cs1F3_ICSD_290448        | insulator  | insulator |
| Ca1Cs1H3_ICSD_168718        | insulator  | insulator |
| Ca1Cs1H3_ICSD_619213        | insulator  | insulator |
| Ca1Cs1N3O6_ICSD_56433       | insulator  | insulator |
| Ca1Cs2F4_ICSD_82616         | insulator  | insulator |
| Ca1Cs2H4_ICSD_261358        | insulator  | insulator |
| Ca1Cu1F4_ICSD_9928          | insulator  | insulator |
| Ca1Cu1Ge1_ICSD_100071       | metal      | metal     |
| Ca1Cu1Ge1_ICSD_408580       | metal      | metal     |
| Ca1Cu1Ge2O6_ICSD_170819     | insulator  | insulator |
| Ca1Cu1Ge2O6_ICSD_170823     | insulator  | insulator |
| Ca1Cu1H2O5Si1_ICSD_30926    | insulator  | insulator |
| Ca1Cu1In2_ICSD_106332       | metal      | metal     |
| Ca1Cu1K2N6O12_ICSD_6183     | metal      | metal     |
| Ca1Cu1O10Si4_ICSD_402012    | insulator  | insulator |
| Ca1Cu1O2_ICSD_84868         | insulator  | metal     |
| Ca1Cu1O2_ICSD_93652         | metal      | metal     |
| Ca1Cu1P1_ICSD_49740         | insulator  | insulator |
| Ca1Cu1Sb1_ICSD_659589       | metal      | metal     |
| Ca1Cu1_ICSD_58880           | metal      | metal     |
| Ca1Cu2Ge2_ICSD_619230       | metal      | metal     |
| Ca1Cu2O3_ICSD_15094         | metal      | metal     |
| Ca1Cu2O7Sr2Ti1_ICSD_74165   | metal      | metal     |
| Ca1Cu2P2_ICSD_41756         | metal      | metal     |
| Ca1Cu2Si2_ICSD_25314        | metal      | metal     |
| Ca1Cu2Sn2_ICSD_417717       | metal      | metal     |
| Ca1Cu3Ge4O12_ICSD_184279    | insulator  | insulator |
| Ca1Cu3Mn4O12_ICSD_156374    | metal      | metal     |
| Ca1Cu3O12Pt4_ICSD_248230    | insulator  | insulator |
| Ca1Cu3O12Ru4_ICSD_51894     | metal      | metal     |
| Ca1Cu3O12Sn4_ICSD_184281    | insulator  | insulator |
| Ca1Cu3O12Ti4_ICSD_161826    | insulator  | insulator |
| Ca1Cu3O12Ti4_ICSD_246526    | insulator  | insulator |
| Ca1Cu3O12Ti4_ICSD_30592     | metal      | insulator |
| Ca1Cu3O12V4_ICSD_250094     | metal      | insulator |
| Ca1Cu4In1_ICSD_370005       | metal      | metal     |
| Ca1Cu4O24Re3Sr8_ICSD_97514  | metal      | insulator |
| Ca1Cu4P2_ICSD_62553         | metal      | metal     |
| Ca1Cu5_ICSD_58882           | metal      | metal     |

Supplementary Table 225. Five-fold cross validated predictions for the metal/insulator classification (217/598).

| system                  | calculated | predicted |
|-------------------------|------------|-----------|
| Ca1Cu9Sn4_ICSD_417718   | metal      | metal     |
| Ca1Er2S4_ICSD_619253    | insulator  | insulator |
| Ca1F1H4O5P1_ICSD_2802   | insulator  | insulator |
| Ca1F2_ICSD_51237        | insulator  | insulator |
| Ca1F2_ICSD_51239        | insulator  | insulator |
| Ca1F2_ICSD_51283        | insulator  | insulator |
| Ca1F2_ICSD_60368        | insulator  | insulator |
| Ca1F3K1_ICSD_153629     | insulator  | insulator |
| Ca1F3K1_ICSD_154073     | insulator  | insulator |
| Ca1F3Rb1_ICSD_201252    | insulator  | insulator |
| Ca1F4H2_ICSD_419144     | insulator  | insulator |
| Ca1F4Pd1_ICSD_32674     | insulator  | insulator |
| Ca1F4Zn1_ICSD_31366     | insulator  | insulator |
| Ca1F5Fe1_ICSD_412862    | insulator  | insulator |
| Ca1F5Mn1_ICSD_69632     | insulator  | insulator |
| Ca1F5Ti1_ICSD_49529     | insulator  | insulator |
| Ca1F6Ga1Li1_ICSD_152300 | insulator  | insulator |
| Ca1F6Li1Ni1_ICSD_32732  | insulator  | insulator |
| Ca1F6Pb1_ICSD_25522     | insulator  | insulator |
| Ca1F6Pd1_ICSD_26164     | insulator  | insulator |
| Ca1F6Pt1_ICSD_37443     | insulator  | insulator |
| Ca1F6Rh1_ICSD_42160     | insulator  | insulator |
| Ca1F6Si1_ICSD_183914    | insulator  | insulator |
| Ca1F6Sn1_ICSD_35713     | insulator  | insulator |
| Ca1F6Sn1_ICSD_35723     | insulator  | insulator |
| Ca1F6Sn2_ICSD_92907     | insulator  | insulator |
| Ca1F6Tb1_ICSD_59986     | metal      | insulator |
| Ca1F8Hf1Li2_ICSD_95248  | insulator  | insulator |
| Ca1Fe1Ge2O6_ICSD_290257 | insulator  | insulator |
| Ca1Fe1O2_ICSD_173438    | metal      | metal     |
| Ca1Fe1O2_ICSD_246245    | insulator  | metal     |
| Ca1Fe1O3_ICSD_92339     | metal      | insulator |
| Ca1Fe1O3_ICSD_92340     | insulator  | insulator |
| Ca1Fe1O3_ICSD_92342     | insulator  | insulator |
| Ca1Fe1O3_ICSD_92343     | metal      | insulator |
| Ca1Fe1O3_ICSD_92349     | metal      | insulator |
| Ca1Fe1O6Si2_ICSD_83438  | insulator  | insulator |
| Ca1Fe1O6Ti2_ICSD_79353  | insulator  | insulator |
| Ca1Fe2O4_ICSD_159751    | metal      | insulator |
| Ca1Fe2O4_ICSD_16695     | insulator  | metal     |
| Ca1Fe2P2_ICSD_10463     | metal      | metal     |
| Ca1Fe2P2_ICSD_54406     | metal      | metal     |
| Ca1Fe2Si2_ICSD_425467   | metal      | metal     |
| Ca1Fe3O12Ti4_ICSD_79277 | insulator  | metal     |
| Ca1Fe3O5_ICSD_16354     | insulator  | insulator |
| Ca1Fe4O6_ICSD_16355     | insulator  | insulator |
| Ca1Fe4Sb12_ICSD_42961   | metal      | metal     |
| Ca1Fe5O7_ICSD_16356     | insulator  | insulator |
| Ca1Ga1Ge1H1_ICSD_173567 | insulator  | insulator |
| Ca1Ga1Ge1_ICSD_66002    | metal      | metal     |

Supplementary Table 226. Five-fold cross validated predictions for the metal/insulator classification (218/598).

| system                  | calculated | predicted |
|-------------------------|------------|-----------|
| Ca1Ga1H1Si1_ICSD_173566 | insulator  | insulator |
| Ca1Ga1H1Sn1_ICSD_173568 | insulator  | insulator |
| Ca1Ga1H4_ICSD_240695    | metal      | insulator |
| Ca1Ga1La1O4_ICSD_96463  | insulator  | insulator |
| Ca1Ga1Li1N2_ICSD_415411 | insulator  | insulator |
| Ca1Ga1N1_ICSD_2027      | metal      | insulator |
| Ca1Ga1Pt1_ICSD_106340   | metal      | metal     |
| Ca1Ga1_ICSD_419100      | metal      | metal     |
| Ca1Ga2Ni1_ICSD_710075   | metal      | metal     |
| Ca1Ga2P2_ICSD_422525    | insulator  | insulator |
| Ca1Ga2S4_ICSD_619292    | insulator  | insulator |
| Ca1Ga2_ICSD_260645      | metal      | metal     |
| Ca1Ga2_ICSD_619281      | metal      | metal     |
| Ca1Ga3Ni2_ICSD_58898    | metal      | metal     |
| Ca1Ga4O7_ICSD_10351     | insulator  | insulator |
| Ca1Ga4_ICSD_54994       | metal      | metal     |
| Ca1Ga4_ICSD_619282      | metal      | metal     |
| Ca1Ge1Li2O4_ICSD_19024  | insulator  | insulator |
| Ca1Ge1Mg1_ICSD_42456    | metal      | metal     |
| Ca1Ge1N2_ICSD_23523     | insulator  | insulator |
| Ca1Ge1Ni1_ICSD_418852   | metal      | metal     |
| Ca1Ge1O3_ICSD_403086    | insulator  | insulator |
| Ca1Ge1O5Ti1_ICSD_171795 | metal      | insulator |
| Ca1Ge1O5Zr1_ICSD_154327 | insulator  | insulator |
| Ca1Ge1O8P2_ICSD_423043  | insulator  | insulator |
| Ca1Ge1Pt1_ICSD_106343   | metal      | metal     |
| Ca1Ge1Sr1_ICSD_172006   | insulator  | metal     |
| Ca1Ge1Zn1_ICSD_52772    | metal      | metal     |
| Ca1Ge1_ICSD_185653      | metal      | metal     |
| Ca1Ge2Ir2_ICSD_52755    | metal      | metal     |
| Ca1Ge2Li1_ICSD_25328    | metal      | metal     |
| Ca1Ge2Mn2_ICSD_80505    | metal      | metal     |
| Ca1Ge2Mn2_ICSD_81743    | metal      | metal     |
| Ca1Ge2Ni1_ICSD_240342   | metal      | metal     |
| Ca1Ge2Ni2_ICSD_408      | metal      | metal     |
| Ca1Ge2O5_ICSD_151581    | insulator  | insulator |
| Ca1Ge2O5_ICSD_156194    | insulator  | insulator |
| Ca1Ge2O5_ICSD_200614    | insulator  | insulator |
| Ca1Ge2O6Zn1_ICSD_59938  | insulator  | insulator |
| Ca1Ge2Pd2_ICSD_52759    | metal      | metal     |
| Ca1Ge2Pt2_ICSD_619327   | metal      | metal     |
| Ca1Ge2Rh2_ICSD_52760    | metal      | metal     |
| Ca1Ge2Ru2_ICSD_52761    | metal      | metal     |
| Ca1Ge2Zn2_ICSD_25319    | metal      | metal     |
| Ca1Ge2_ICSD_185657      | metal      | metal     |
| Ca1Ge2_ICSD_185658      | metal      | metal     |
| Ca1Ge2_ICSD_245611      | metal      | metal     |
| Ca1Ge2_ICSD_619304      | metal      | metal     |
| Ca1Ge3_ICSD_262736      | metal      | metal     |
| Ca1H10O8Zn2_ICSD_260592 | insulator  | insulator |

Supplementary Table 227. Five-fold cross validated predictions for the metal/insulator classification (219/598).

| system                    | calculated | predicted |
|---------------------------|------------|-----------|
| Ca1H12N2O10S2_ICSD_410199 | insulator  | insulator |
| Ca1H1I1_ICSD_25545        | insulator  | insulator |
| Ca1H1K3O8P2_ICSD_35344    | insulator  | insulator |
| Ca1H1Mn1O5Si1_ICSD_83774  | insulator  | insulator |
| Ca1H1Na1O4Si1_ICSD_97911  | insulator  | insulator |
| Ca1H1Ni5_ICSD_189750      | metal      | metal     |
| Ca1H1Ni5_ICSD_189752      | metal      | metal     |
| Ca1H1Ni5_ICSD_189753      | metal      | metal     |
| Ca1H1Ni5_ICSD_189754      | metal      | metal     |
| Ca1H1O4P1_ICSD_87196      | insulator  | insulator |
| Ca1H2I2O7_ICSD_36635      | insulator  | insulator |
| Ca1H2K2O9S2_ICSD_157072   | insulator  | insulator |
| Ca1H2O12P4_ICSD_82359     | insulator  | insulator |
| Ca1H2O2_ICSD_15471        | insulator  | insulator |
| Ca1H2O5Si1Zn1_ICSD_34944  | insulator  | insulator |
| Ca1H2O7P2_ICSD_91818      | insulator  | insulator |
| Ca1H2_ICSD_157943         | insulator  | insulator |
| Ca1H2_ICSD_261635         | insulator  | insulator |
| Ca1H3K1_ICSD_168716       | insulator  | insulator |
| Ca1H3Li1_ICSD_168713      | insulator  | insulator |
| Ca1H3Na1_ICSD_168715      | insulator  | insulator |
| Ca1H3O4P1_ICSD_411737     | insulator  | insulator |
| Ca1H3Rb1_ICSD_65195       | insulator  | insulator |
| Ca1H4Mg1Ni1_ICSD_400003   | insulator  | insulator |
| Ca1H4O4P2_ICSD_44413      | insulator  | insulator |
| Ca1H4O6S1_ICSD_2059       | insulator  | insulator |
| Ca1H4O7Se2_ICSD_84441     | insulator  | insulator |
| Ca1H4Rb2_ICSD_65196       | insulator  | insulator |
| Ca1H5O6P1_ICSD_98804      | insulator  | insulator |
| Ca1H6K1N3_ICSD_1359       | insulator  | insulator |
| Ca1H6N3Rb1_ICSD_14014     | insulator  | insulator |
| Ca1H6O16S4_ICSD_85073     | metal      | insulator |
| Ca1H6O7P2_ICSD_36285      | insulator  | insulator |
| Ca1H6O9P2_ICSD_133        | insulator  | insulator |
| Ca1H8K2N12O4_ICSD_34953   | insulator  | insulator |
| Ca1H8O14P2V2_ICSD_67660   | insulator  | insulator |
| Ca1Hg11_ICSD_58902        | metal      | metal     |
| Ca1Hg1O2_ICSD_80717       | insulator  | insulator |
| Ca1Hg1Pb1_ICSD_106345     | metal      | metal     |
| Ca1Hg1Sn1_ICSD_602726     | metal      | metal     |
| Ca1Hg1Sn1_ICSD_659596     | metal      | metal     |
| Ca1Hg1_ICSD_58900         | metal      | metal     |
| Ca1Hg2_ICSD_58901         | metal      | metal     |
| Ca1Hg2_ICSD_619359        | metal      | metal     |
| Ca1Hg3_ICSD_619356        | metal      | metal     |
| Ca1Ho2S4_ICSD_619369      | insulator  | insulator |
| Ca1I2O6_ICSD_1391         | insulator  | insulator |
| Ca1I2_ICSD_52280          | insulator  | insulator |
| Ca1In1Pt1_ICSD_106348     | metal      | metal     |
| Ca1In1Rh1_ICSD_410841     | metal      | metal     |

Supplementary Table 228. Five-fold cross validated predictions for the metal/insulator classification (220/598).

| system                    | calculated | predicted |
|---------------------------|------------|-----------|
| Ca1In1S4Yb1.ICSD.67655    | metal      | insulator |
| Ca1In1Se4Yb1.ICSD.67654   | metal      | insulator |
| Ca1In1.ICSD.414231        | metal      | metal     |
| Ca1In1.ICSD.58905         | metal      | metal     |
| Ca1In2Ni1.ICSD.619378     | metal      | metal     |
| Ca1In2O4.ICSD.52390       | insulator  | insulator |
| Ca1In2P2.ICSD.260562      | insulator  | insulator |
| Ca1In2Pd1.ICSD.408881     | metal      | metal     |
| Ca1In2Pt1.ICSD.408880     | metal      | metal     |
| Ca1In2.ICSD.58686         | metal      | metal     |
| Ca1In2.ICSD.58906         | metal      | metal     |
| Ca1In2.ICSD.619376        | metal      | metal     |
| Ca1In4Ir1.ICSD.410892     | metal      | metal     |
| Ca1In4Ni1.ICSD.106347     | metal      | metal     |
| Ca1In4Pd1.ICSD.410890     | metal      | metal     |
| Ca1In4Rh1.ICSD.410891     | metal      | metal     |
| Ca1Ir1O3.ICSD.159026      | metal      | metal     |
| Ca1Ir1O3.ICSD.159037      | metal      | metal     |
| Ca1Ir1O6Sr3.ICSD.81899    | metal      | metal     |
| Ca1Ir1Si3.ICSD.180962     | metal      | metal     |
| Ca1Ir1Sn2.ICSD.410773     | metal      | metal     |
| Ca1Ir2P2.ICSD.95756       | insulator  | insulator |
| Ca1Ir2.ICSD.108146        | metal      | metal     |
| Ca1Ir3Si7.ICSD.181449     | metal      | metal     |
| Ca1K1O9P3.ICSD.281588     | insulator  | insulator |
| Ca1K2N4O8.ICSD.85505      | insulator  | insulator |
| Ca1K2N6Ni1O12.ICSD.26748  | metal      | metal     |
| Ca1Li1N1.ICSD.107304      | insulator  | insulator |
| Ca1Li1Pb1.ICSD.409533     | metal      | metal     |
| Ca1Li1Sb1.ICSD.52775      | insulator  | insulator |
| Ca1Li1Si2.ICSD.25327      | metal      | metal     |
| Ca1Li1Sn1.ICSD.58911      | metal      | metal     |
| Ca1Li2N4Si2.ICSD.421548   | insulator  | insulator |
| Ca1Li2O4Si1.ICSD.19023    | insulator  | insulator |
| Ca1Li2O7Ta2.ICSD.245841   | insulator  | insulator |
| Ca1Li2.ICSD.413207        | metal      | metal     |
| Ca1Li2.ICSD.619390        | metal      | metal     |
| Ca1Li4O8Si2Sr1.ICSD.79867 | insulator  | insulator |
| Ca1Lu2S4.ICSD.200013      | insulator  | insulator |
| Ca1Mg1Ni4.ICSD.107419     | metal      | metal     |
| Ca1Mg1O6Si2.ICSD.159522   | insulator  | insulator |
| Ca1Mg1Pb1.ICSD.619403     | metal      | metal     |
| Ca1Mg1Si1.ICSD.158276     | metal      | metal     |
| Ca1Mg1Sn1.ICSD.42757      | metal      | metal     |
| Ca1Mg2N2.ICSD.411175      | insulator  | insulator |
| Ca1Mg2O12S3.ICSD.418454   | insulator  | insulator |
| Ca1Mg2Sb2.ICSD.100045     | insulator  | insulator |
| Ca1Mg2.ICSD.370044        | metal      | metal     |
| Ca1Mn1O3.ICSD.168903      | metal      | metal     |
| Ca1Mn1O3.ICSD.168906      | insulator  | insulator |

Supplementary Table 229. Five-fold cross validated predictions for the metal/insulator classification (221/598).

| system                  | calculated | predicted |
|-------------------------|------------|-----------|
| Ca1Mn1O3.ICSD.86645     | insulator  | insulator |
| Ca1Mn1O6Si2.ICSD.168042 | insulator  | insulator |
| Ca1Mn1O7P2.ICSD.78659   | insulator  | insulator |
| Ca1Mn1Sb2.ICSD.52705    | metal      | metal     |
| Ca1Mn1Si1.ICSD.66949    | metal      | metal     |
| Ca1Mn1Sn1.ICSD.66950    | metal      | metal     |
| Ca1Mn28.ICSD.619408     | metal      | metal     |
| Ca1Mn2O4.ICSD.93749     | insulator  | metal     |
| Ca1Mn2P2.ICSD.49017     | metal      | metal     |
| Ca1Mn2Sb2.ICSD.164898   | metal      | metal     |
| Ca1Mn2Sb2.ICSD.164899   | metal      | metal     |
| Ca1Mn7O12.ICSD.187416   | metal      | metal     |
| Ca1Mo1O4.ICSD.60553     | insulator  | insulator |
| Ca1Mo1O6Sr2.ICSD.72815  | insulator  | insulator |
| Ca1Mo1O6Sr2.ICSD.72816  | insulator  | insulator |
| Ca1Mo4O16U1.ICSD.202234 | insulator  | insulator |
| Ca1Mo6S8.ICSD.619421    | metal      | metal     |
| Ca1N1Ni1.ICSD.656846    | metal      | metal     |
| Ca1N1O2Ta1.ICSD.161824  | insulator  | insulator |
| Ca1N2O6.ICSD.52351      | insulator  | insulator |
| Ca1N2Si1.ICSD.170267    | insulator  | insulator |
| Ca1N2.ICSD.423721       | metal      | insulator |
| Ca1N6.ICSD.35227        | insulator  | insulator |
| Ca1Na10Sn12.ICSD.240006 | insulator  | insulator |
| Ca1Na1O4V1.ICSD.32573   | insulator  | insulator |
| Ca1Na2O12V4.ICSD.161368 | insulator  | insulator |
| Ca1Na2O4Si1.ICSD.24235  | insulator  | insulator |
| Ca1Na2O7P2.ICSD.89468   | insulator  | insulator |
| Ca1Na2O8S2.ICSD.28429   | insulator  | insulator |
| Ca1Na4O18P6.ICSD.281508 | insulator  | insulator |
| Ca1Na4Sn6.ICSD.172208   | metal      | metal     |
| Ca1Nb1O3.ICSD.51202     | metal      | insulator |
| Ca1Nb2O11P2.ICSD.72115  | insulator  | insulator |
| Ca1Nb2O4.ICSD.88779     | insulator  | insulator |
| Ca1Nb2O6.ICSD.15208     | insulator  | insulator |
| Ca1Ni1O6Si2.ICSD.159545 | insulator  | insulator |
| Ca1Ni1O6Si2.ICSD.246208 | insulator  | insulator |
| Ca1Ni2P2.ICSD.10461     | metal      | metal     |
| Ca1Ni2Si1.ICSD.412411   | metal      | metal     |
| Ca1Ni2Si2.ICSD.90579    | metal      | metal     |
| Ca1Ni2Zn3.ICSD.245512   | metal      | metal     |
| Ca1Ni2.ICSD.619440      | metal      | metal     |
| Ca1Ni3O14P4.ICSD.74046  | insulator  | insulator |
| Ca1Ni3.ICSD.619444      | metal      | metal     |
| Ca1Ni4O8.ICSD.40470     | insulator  | insulator |
| Ca1Ni4Sn2.ICSD.418133   | metal      | metal     |
| Ca1Ni5.ICSD.619446      | metal      | metal     |
| Ca1Ni5.ICSD.619452      | metal      | metal     |
| Ca1O11P4.ICSD.74953     | insulator  | insulator |
| Ca1O11Ta4.ICSD.1854     | insulator  | insulator |

Supplementary Table 230. Five-fold cross validated predictions for the metal/insulator classification (222/598).

| system                  | calculated | predicted |
|-------------------------|------------|-----------|
| Ca1O1S1Zn1.ICSD.245309  | insulator  | insulator |
| Ca1O1.ICSD.161831       | insulator  | insulator |
| Ca1O1.ICSD.90486        | insulator  | insulator |
| Ca1O24P6Sn4.ICSD.261116 | insulator  | insulator |
| Ca1O24P6Zr4.ICSD.151683 | insulator  | insulator |
| Ca1O2.ICSD.619462       | insulator  | insulator |
| Ca1O3Pt1.ICSD.173278    | insulator  | insulator |
| Ca1O3Rh1.ICSD.164774    | metal      | insulator |
| Ca1O3Rh1.ICSD.164775    | insulator  | metal     |
| Ca1O3Ru1.ICSD.99451     | metal      | insulator |
| Ca1O3Si1.ICSD.20571     | insulator  | insulator |
| Ca1O3Si1.ICSD.240432    | insulator  | insulator |
| Ca1O3Si1.ICSD.240442    | insulator  | insulator |
| Ca1O3Si1.ICSD.240450    | insulator  | insulator |
| Ca1O3Si1.ICSD.240456    | insulator  | insulator |
| Ca1O3Si1.ICSD.240461    | insulator  | insulator |
| Ca1O3Si1.ICSD.240465    | insulator  | insulator |
| Ca1O3Si1.ICSD.240468    | insulator  | insulator |
| Ca1O3Si1.ICSD.40658     | insulator  | insulator |
| Ca1O3Si1.ICSD.87694     | insulator  | insulator |
| Ca1O3Sn1.ICSD.2373      | insulator  | insulator |
| Ca1O3Sn1.ICSD.27777     | metal      | insulator |
| Ca1O3Sn1.ICSD.56095     | insulator  | insulator |
| Ca1O3Tc1.ICSD.261341    | insulator  | metal     |
| Ca1O3Te1.ICSD.260238    | insulator  | insulator |
| Ca1O3Ti1.ICSD.162919    | insulator  | insulator |
| Ca1O3Ti1.ICSD.165801    | insulator  | insulator |
| Ca1O3Ti1.ICSD.187294    | insulator  | insulator |
| Ca1O3Ti1.ICSD.29116     | insulator  | insulator |
| Ca1O3Ti1.ICSD.31864     | insulator  | insulator |
| Ca1O3Ti1.ICSD.50364     | insulator  | insulator |
| Ca1O3V1.ICSD.88978      | insulator  | insulator |
| Ca1O3Zr1.ICSD.56094     | insulator  | insulator |
| Ca1O3Zr1.ICSD.97466     | insulator  | insulator |
| Ca1O4Pd3.ICSD.186819    | metal      | metal     |
| Ca1O4Pt2.ICSD.6159      | metal      | insulator |
| Ca1O4Rh2.ICSD.170597    | insulator  | metal     |
| Ca1O4S1.ICSD.171053     | insulator  | insulator |
| Ca1O4S1.ICSD.79527      | insulator  | insulator |
| Ca1O4S1.ICSD.86316      | insulator  | insulator |
| Ca1O4Te1.ICSD.8097      | insulator  | insulator |
| Ca1O4Ti2.ICSD.413874    | metal      | insulator |
| Ca1O4U1.ICSD.31631      | insulator  | insulator |
| Ca1O4W1.ICSD.60548      | insulator  | insulator |
| Ca1O4Yb2.ICSD.27312     | metal      | insulator |
| Ca1O5Se2.ICSD.27209     | insulator  | insulator |
| Ca1O5Si1Sn1.ICSD.96819  | insulator  | insulator |
| Ca1O5Si1Sn1.ICSD.96820  | insulator  | insulator |
| Ca1O5Si1Ti1.ICSD.159343 | insulator  | insulator |
| Ca1O5Si2.ICSD.87498     | insulator  | insulator |

Supplementary Table 231. Five-fold cross validated predictions for the metal/insulator classification (223/598).

| system                  | calculated | predicted |
|-------------------------|------------|-----------|
| Ca1O5Te2.ICSD.260041    | insulator  | insulator |
| Ca1O5V2.ICSD.82689      | insulator  | insulator |
| Ca1O6P2.ICSD.417710     | insulator  | insulator |
| Ca1O6P2.ICSD.60117      | insulator  | insulator |
| Ca1O6Sb2.ICSD.74539     | insulator  | insulator |
| Ca1O6Si2Zn1.ICSD.158143 | insulator  | insulator |
| Ca1O6Sr2W1.ICSD.36459   | insulator  | insulator |
| Ca1O6Sr2W1.ICSD.36460   | insulator  | insulator |
| Ca1O6Ta2.ICSD.24091     | insulator  | insulator |
| Ca1O6Ta2.ICSD.47121     | insulator  | insulator |
| Ca1O6V2.ICSD.21064      | insulator  | insulator |
| Ca1O7Si2Zr1.ICSD.203131 | insulator  | insulator |
| Ca1O7V3.ICSD.241204     | insulator  | insulator |
| Ca1O8P2U1.ICSD.81388    | insulator  | insulator |
| Ca1O8P2Zn2.ICSD.202571  | insulator  | insulator |
| Ca1O8Te3.ICSD.100661    | insulator  | insulator |
| Ca1O9P2V2.ICSD.79735    | insulator  | insulator |
| Ca1O9V4.ICSD.2556       | insulator  | insulator |
| Ca1P1Pt1.ICSD.60826     | insulator  | metal     |
| Ca1P2Pd2.ICSD.36371     | metal      | metal     |
| Ca1P2Rh2.ICSD.50185     | metal      | metal     |
| Ca1P2Ru2.ICSD.602125    | metal      | metal     |
| Ca1P2Zn2.ICSD.619477    | insulator  | insulator |
| Ca1P3.ICSD.74479        | metal      | insulator |
| Ca1Pb1Pd1.ICSD.106355   | metal      | metal     |
| Ca1Pb1Pd1.ICSD.602349   | metal      | metal     |
| Ca1Pb1Pt1.ICSD.602366   | metal      | metal     |
| Ca1Pb1Sr1.ICSD.172008   | insulator  | metal     |
| Ca1Pb1Zn1.ICSD.659603   | metal      | metal     |
| Ca1Pb1.ICSD.58918       | metal      | metal     |
| Ca1Pb3.ICSD.619485      | metal      | metal     |
| Ca1Pd1Si1.ICSD.69790    | metal      | metal     |
| Ca1Pd1Sn1.ICSD.58690    | metal      | metal     |
| Ca1Pd1Sn1.ICSD.602357   | metal      | metal     |
| Ca1Pd1Sn2.ICSD.410774   | metal      | metal     |
| Ca1Pd1.ICSD.58926       | metal      | metal     |
| Ca1Pd2Si2.ICSD.619506   | metal      | metal     |
| Ca1Pd2.ICSD.58927       | metal      | metal     |
| Ca1Pd5.ICSD.106357      | metal      | metal     |
| Ca1Pt1Sb1.ICSD.60830    | metal      | metal     |
| Ca1Pt1Si1.ICSD.63555    | metal      | metal     |
| Ca1Pt1Si1.ICSD.72641    | metal      | metal     |
| Ca1Pt1Si1.ICSD.72642    | metal      | metal     |
| Ca1Pt1Si3.ICSD.181448   | metal      | metal     |
| Ca1Pt1Sn1.ICSD.602355   | metal      | metal     |
| Ca1Pt2.ICSD.109140      | metal      | metal     |
| Ca1Pt2.ICSD.619516      | metal      | metal     |
| Ca1Pt5.ICSD.58929       | metal      | metal     |
| Ca1Rb1Sb1.ICSD.409178   | insulator  | insulator |
| Ca1Rh1Sn2.ICSD.410775   | metal      | metal     |

Supplementary Table 232. Five-fold cross validated predictions for the metal/insulator classification (224/598).

| system                  | calculated | predicted |
|-------------------------|------------|-----------|
| Ca1Rh2Si2.ICSD.425469   | metal      | metal     |
| Ca1Rh2.ICSD.108145      | metal      | metal     |
| Ca1S1.ICSD.186785       | insulator  | insulator |
| Ca1S3Zr1.ICSD.23286     | insulator  | insulator |
| Ca1S4Y2.ICSD.619557     | insulator  | insulator |
| Ca1S4Yb2.ICSD.619559    | insulator  | metal     |
| Ca1Sb2Zn2.ICSD.12150    | metal      | metal     |
| Ca1Sb2.ICSD.862         | metal      | metal     |
| Ca1Se1.ICSD.167834      | insulator  | insulator |
| Ca1Se1.ICSD.53948       | insulator  | insulator |
| Ca1Si1Sr1.ICSD.172005   | insulator  | insulator |
| Ca1Si1Zn1.ICSD.52791    | metal      | metal     |
| Ca1Si1.ICSD.25570       | metal      | metal     |
| Ca1Si1.ICSD.619586      | metal      | metal     |
| Ca1Si2Zn2.ICSD.59649    | metal      | metal     |
| Ca1Si2.ICSD.154431      | metal      | metal     |
| Ca1Si2.ICSD.154433      | metal      | metal     |
| Ca1Si2.ICSD.32007       | metal      | metal     |
| Ca1Si2.ICSD.409057      | metal      | metal     |
| Ca1Si2.ICSD.41450       | metal      | metal     |
| Ca1Si3.ICSD.263004      | metal      | metal     |
| Ca1Sn1Sr1.ICSD.172007   | insulator  | insulator |
| Ca1Sn1Zn1.ICSD.106358   | metal      | metal     |
| Ca1Sn1Zn1.ICSD.659612   | metal      | metal     |
| Ca1Sn1.ICSD.55213       | metal      | metal     |
| Ca1Sn3.ICSD.58934       | metal      | metal     |
| Ca1Te1.ICSD.52792       | metal      | metal     |
| Ca1Te1.ICSD.619616      | insulator  | insulator |
| Ca1Ti1.ICSD.619623      | metal      | metal     |
| Ca1Ti3.ICSD.58942       | metal      | metal     |
| Ca1Zn11.ICSD.619630     | metal      | metal     |
| Ca1Zn13.ICSD.619636     | metal      | metal     |
| Ca1Zn1.ICSD.58944       | metal      | metal     |
| Ca1Zn2.ICSD.418878      | metal      | metal     |
| Ca1Zn2.ICSD.58945       | metal      | metal     |
| Ca1Zn5.ICSD.619638      | metal      | metal     |
| Ca1.ICSD.107510         | metal      | metal     |
| Ca1.ICSD.107511         | metal      | metal     |
| Ca1.ICSD.162253         | metal      | metal     |
| Ca1.ICSD.162255         | metal      | metal     |
| Ca1.ICSD.162256         | metal      | metal     |
| Ca1.ICSD.168758         | metal      | metal     |
| Ca1.ICSD.168759         | metal      | metal     |
| Ca1.ICSD.188391         | metal      | metal     |
| Ca1.ICSD.52270          | metal      | metal     |
| Ca1.ICSD.52748          | metal      | metal     |
| Ca1.ICSD.53768          | metal      | metal     |
| Ca22O36S2Si8.ICSD.26407 | insulator  | insulator |
| Ca2Cd1P2.ICSD.422580    | insulator  | insulator |
| Ca2Cd1Pd2.ICSD.425471   | metal      | metal     |

Supplementary Table 233. Five-fold cross validated predictions for the metal/insulator classification (225/598).

| system                      | calculated | predicted |
|-----------------------------|------------|-----------|
| Ca2Cd1Pt2.ICSD.424554       | metal      | metal     |
| Ca2Cd1Sb2.ICSD.173172       | insulator  | metal     |
| Ca2Cd2K1Sb3.ICSD.420619     | metal      | insulator |
| Ca2Cl1Cr1O4.ICSD.15315      | insulator  | insulator |
| Ca2Cl1Cu1Nb3O10.ICSD.51262  | metal      | insulator |
| Ca2Cl1Fe1O3.ICSD.56880      | insulator  | insulator |
| Ca2Cl1N1.ICSD.153101        | insulator  | insulator |
| Ca2Cl1O4P1.ICSD.15316       | insulator  | insulator |
| Ca2Cl2Cu1O10Te4.ICSD.171007 | insulator  | insulator |
| Ca2Cl2Cu1O2.ICSD.1027       | metal      | metal     |
| Ca2Cl2O3Si1.ICSD.200221     | insulator  | insulator |
| Ca2Co1Fe1O5.ICSD.169345     | metal      | insulator |
| Ca2Co1O3.ICSD.95439         | insulator  | insulator |
| Ca2Co1O7Si2.ICSD.94137      | insulator  | insulator |
| Ca2Cr4O16P4.ICSD.412383     | insulator  | insulator |
| Ca2Cs1O10Ta3.ICSD.89011     | insulator  | insulator |
| Ca2Cu1Fe1O3S1.ICSD.169992   | insulator  | insulator |
| Ca2Cu1Fe1O3Se1.ICSD.169993  | insulator  | insulator |
| Ca2Cu1O3.ICSD.202995        | metal      | metal     |
| Ca2Cu1O3.ICSD.93651         | metal      | metal     |
| Ca2Cu1P3Zn2.ICSD.89517      | insulator  | insulator |
| Ca2Cu1.ICSD.108865          | metal      | metal     |
| Ca2Cu2Ga1.ICSD.58885        | metal      | metal     |
| Ca2F1O6Ta2.ICSD.50048       | metal      | insulator |
| Ca2F2Mg5O22Si8.ICSD.22020   | insulator  | insulator |
| Ca2F4.ICSD.246961           | insulator  | insulator |
| Ca2Fe1H8O12P2.ICSD.200477   | insulator  | insulator |
| Ca2Fe1Mn1O5.ICSD.85125      | metal      | insulator |
| Ca2Fe1N2.ICSD.72389         | insulator  | insulator |
| Ca2Fe1O6W1.ICSD.81203       | insulator  | insulator |
| Ca2Fe1O6W1.ICSD.81204       | insulator  | insulator |
| Ca2Fe2O5.ICSD.161513        | insulator  | insulator |
| Ca2Fe7O11.ICSD.100827       | insulator  | insulator |
| Ca2Fe9O13.ICSD.100826       | insulator  | insulator |
| Ca2Ga1Mn1O5.ICSD.51464      | metal      | insulator |
| Ca2Ga1Mn1O5.ICSD.51466      | metal      | insulator |
| Ca2Ge1In2Sr1.ICSD.85466     | metal      | metal     |
| Ca2Ge1N2.ICSD.280252        | metal      | insulator |
| Ca2Ge1O4.ICSD.16258         | insulator  | insulator |
| Ca2Ge1O4.ICSD.173468        | insulator  | insulator |
| Ca2Ge1O4.ICSD.182051        | insulator  | insulator |
| Ca2Ge1O4.ICSD.39157         | metal      | metal     |
| Ca2Ge1S4.ICSD.619332        | insulator  | insulator |
| Ca2Ge1.ICSD.42455           | insulator  | metal     |
| Ca2Ge2H2Ni2.ICSD.263028     | metal      | metal     |
| Ca2Ge2In1Li1.ICSD.280690    | metal      | metal     |
| Ca2Ge2Ni3.ICSD.421074       | metal      | metal     |
| Ca2Ge2O7Zn1.ICSD.69387      | insulator  | insulator |
| Ca2Ge3Li1.ICSD.25323        | metal      | metal     |
| Ca2Ge7O16.ICSD.200603       | insulator  | insulator |

Supplementary Table 234. Five-fold cross validated predictions for the metal/insulator classification (226/598).

| system                     | calculated | predicted |
|----------------------------|------------|-----------|
| Ca2Ge7O16.ICSD_249322      | insulator  | insulator |
| Ca2H18O12Re6S8.ICSD_415689 | insulator  | insulator |
| Ca2H1N1.ICSD_292           | insulator  | insulator |
| Ca2H1Na1O9Si3.ICSD_26820   | insulator  | insulator |
| Ca2H2Mg5O24Si8.ICSD_9659   | insulator  | insulator |
| Ca2H4Mg1O10P2.ICSD_4258    | insulator  | insulator |
| Ca2H4Mn1O10P2.ICSD_156225  | insulator  | insulator |
| Ca2H4O13P3V1.ICSD_165406   | insulator  | insulator |
| Ca2H4O9P2.ICSD_1912        | insulator  | insulator |
| Ca2H6Ru1.ICSD_656082       | insulator  | insulator |
| Ca2Hf7O16.ICSD_4136        | insulator  | insulator |
| Ca2Hg1.ICSD_619362         | metal      | metal     |
| Ca2I1N1.ICSD_65216         | insulator  | insulator |
| Ca2I1P1.ICSD_6068          | insulator  | insulator |
| Ca2In1Pd2.ICSD_418202      | metal      | metal     |
| Ca2In1Pt2.ICSD_418203      | metal      | metal     |
| Ca2In1.ICSD_413803         | metal      | metal     |
| Ca2Ir1O4.ICSD_25500        | insulator  | metal     |
| Ca2Ir2Si1.ICSD_95789       | metal      | metal     |
| Ca2K2O12S3.ICSD_40988      | insulator  | insulator |
| Ca2K8O24U6.ICSD_91783      | insulator  | insulator |
| Ca2Li1Si3.ICSD_25322       | metal      | metal     |
| Ca2Li6Mn2N6.ICSD_408324    | insulator  | insulator |
| Ca2Mg1O6W1.ICSD_281564     | insulator  | insulator |
| Ca2Mg1O7Si2.ICSD_158177    | insulator  | insulator |
| Ca2Mn1O6Sb1.ICSD_246090    | insulator  | insulator |
| Ca2Mn1O6Ta1.ICSD_246091    | insulator  | insulator |
| Ca2Mn1O6W1.ICSD_51615      | metal      | insulator |
| Ca2Mn2O5.ICSD_35130        | metal      | insulator |
| Ca2Mn3O8.ICSD_24847        | insulator  | insulator |
| Ca2N1.ICSD_90630           | metal      | metal     |
| Ca2N2Zn1.ICSD_69049        | insulator  | insulator |
| Ca2N3P1.ICSD_72532         | insulator  | insulator |
| Ca2N3V1.ICSD_409644        | insulator  | insulator |
| Ca2N4Sr1W1.ICSD_401331     | insulator  | insulator |
| Ca2N8Si5.ICSD_79070        | insulator  | insulator |
| Ca2Na3O6Ta1.ICSD_280284    | insulator  | insulator |
| Ca2Nb2O7.ICSD_22411        | insulator  | insulator |
| Ca2Nb3O10Rb1.ICSD_260289   | insulator  | insulator |
| Ca2Ni7P4.ICSD_94448        | metal      | metal     |
| Ca2O10Rb1Ta3.ICSD_89010    | insulator  | insulator |
| Ca2O12Rb2S3.ICSD_249339    | insulator  | insulator |
| Ca2O12Si4Zr1.ICSD_73801    | insulator  | insulator |
| Ca2O20Si8Th1.ICSD_64745    | insulator  | insulator |
| Ca2O4Pb1.ICSD_36629        | insulator  | insulator |
| Ca2O4Ru1.ICSD_94244        | insulator  | insulator |
| Ca2O4Si1.ICSD_182052       | insulator  | insulator |
| Ca2O4Si1.ICSD_182054       | insulator  | insulator |
| Ca2O4Si1.ICSD_245074       | insulator  | insulator |
| Ca2O4Si1.ICSD_280995       | insulator  | insulator |

Supplementary Table 235. Five-fold cross validated predictions for the metal/insulator classification (227/598).

| system                   | calculated | predicted |
|--------------------------|------------|-----------|
| Ca2O4Si1.ICSD_40657      | insulator  | insulator |
| Ca2O4Sn1.ICSD_9011       | insulator  | insulator |
| Ca2O5U1.ICSD_23198       | insulator  | insulator |
| Ca2O6Pd1W1.ICSD_83258    | insulator  | insulator |
| Ca2O6Pd1W1.ICSD_83259    | insulator  | insulator |
| Ca2O6Si1Ti1.ICSD_83455   | insulator  | insulator |
| Ca2O7Os2.ICSD_97092      | metal      | metal     |
| Ca2O7Ru2.ICSD_156409     | metal      | metal     |
| Ca2O7Sb2.ICSD_166282     | insulator  | insulator |
| Ca2O7Sb2.ICSD_24245      | metal      | insulator |
| Ca2O7Si2Zn1.ICSD_30262   | insulator  | insulator |
| Ca2O7Ta2.ICSD_27121      | insulator  | insulator |
| Ca2O7V2.ICSD_421266      | insulator  | insulator |
| Ca2O8Pt3.ICSD_65412      | insulator  | insulator |
| Ca2O8Se3.ICSD_54155      | insulator  | insulator |
| Ca2O9Pb1Si3.ICSD_18098   | insulator  | insulator |
| Ca2P2S6.ICSD_405192      | insulator  | insulator |
| Ca2P2Se6.ICSD_412765     | metal      | insulator |
| Ca2P2.ICSD_83352         | insulator  | insulator |
| Ca2Pb1.ICSD_58920        | metal      | metal     |
| Ca2Pt3Sn5.ICSD_410772    | metal      | metal     |
| Ca2S4Si1.ICSD_619542     | insulator  | insulator |
| Ca2S4Sn1.ICSD_619548     | insulator  | insulator |
| Ca2S5Sb2.ICSD_201044     | insulator  | insulator |
| Ca2Sb1.ICSD_42135        | insulator  | insulator |
| Ca2Se4Si1.ICSD_619574    | insulator  | insulator |
| Ca2Si1.ICSD_187352       | insulator  | metal     |
| Ca2Si1.ICSD_42453        | insulator  | metal     |
| Ca2Sn1.ICSD_659611       | metal      | metal     |
| Ca3Cd2.ICSD_30082        | metal      | metal     |
| Ca3Cl2Ge1O4.ICSD_249329  | insulator  | insulator |
| Ca3Cl2O4Si1.ICSD_9088    | insulator  | insulator |
| Ca3Cl3P1.ICSD_202075     | insulator  | insulator |
| Ca3Co1Mn1O6.ICSD_93775   | metal      | insulator |
| Ca3Co1O6Rh1.ICSD_50809   | insulator  | insulator |
| Ca3Co1O6Sc1.ICSD_245503  | insulator  | insulator |
| Ca3Co2O6.ICSD_246282     | metal      | insulator |
| Ca3Co4Sn13.ICSD_619211   | metal      | metal     |
| Ca3Cr1N3.ICSD_40205      | insulator  | insulator |
| Ca3Cr2O12Si3.ICSD_82743  | insulator  | insulator |
| Ca3Cr3O16P4.ICSD_412381  | insulator  | insulator |
| Ca3Cu1Ir1O6.ICSD_73188   | metal      | insulator |
| Ca3Cu1O6Rh1.ICSD_96482   | metal      | insulator |
| Ca3Cu2P4Zn2.ICSD_89515   | insulator  | insulator |
| Ca3Cu8Sn4.ICSD_417716    | metal      | metal     |
| Ca3Fe1O6Rh1.ICSD_96484   | insulator  | insulator |
| Ca3Fe2Ge3O12.ICSD_28176  | insulator  | insulator |
| Ca3Fe2O12Si3.ICSD_202964 | insulator  | insulator |
| Ca3Ga2N4.ICSD_170442     | insulator  | insulator |
| Ca3Ga2O12Si3.ICSD_27387  | insulator  | insulator |

Supplementary Table 236. Five-fold cross validated predictions for the metal/insulator classification (228/598).

| system                      | calculated | predicted |
|-----------------------------|------------|-----------|
| Ca3Ga2Pd2.ICSD_107507       | metal      | metal     |
| Ca3Ga2Pt2.ICSD_107506       | metal      | metal     |
| Ca3Ga3O14Si2Ta1.ICSD_245381 | insulator  | insulator |
| Ca3Ga4Ni4.ICSD_58899        | metal      | metal     |
| Ca3Ga4O9.ICSD_100356        | insulator  | insulator |
| Ca3Ga5.ICSD_58894           | metal      | metal     |
| Ca3Ge13Ir4.ICSD_619308      | metal      | metal     |
| Ca3Ge13Rh4.ICSD_619329      | metal      | metal     |
| Ca3Ge1N1.ICSD_106342        | metal      | metal     |
| Ca3Ge1O1.ICSD_181077        | metal      | metal     |
| Ca3Ge2P4.ICSD_41181         | insulator  | insulator |
| Ca3Ge3O12Sc2.ICSD_20215     | insulator  | insulator |
| Ca3Ge3O12Y2.ICSD_280048     | insulator  | insulator |
| Ca3Ge4.ICSD_185654          | insulator  | metal     |
| Ca3H2Pb1.ICSD_165616        | metal      | metal     |
| Ca3H2Sn1.ICSD_165615        | metal      | metal     |
| Ca3Hf1O9Si2.ICSD_79452      | insulator  | insulator |
| Ca3Hg1.ICSD_58903           | metal      | metal     |
| Ca3Hg1.ICSD_619363          | metal      | metal     |
| Ca3Hg2.ICSD_58904           | metal      | metal     |
| Ca3I3P1.ICSD_9026           | insulator  | insulator |
| Ca3In1P3.ICSD_60125         | insulator  | insulator |
| Ca3In1.ICSD_58907           | metal      | metal     |
| Ca3In2O12Si3.ICSD_27390     | insulator  | insulator |
| Ca3Ir4Si4.ICSD_95788        | metal      | metal     |
| Ca3Ir4Sn13.ICSD_619385      | metal      | metal     |
| Ca3Li1O6Os1.ICSD_248206     | insulator  | insulator |
| Ca3Li1O6Ru1.ICSD_96219      | insulator  | insulator |
| Ca3Li4N6Si2.ICSD_420675     | insulator  | insulator |
| Ca3Mn1N3.ICSD_67888         | insulator  | insulator |
| Ca3Mn1NiO6.ICSD_50805       | insulator  | insulator |
| Ca3Mn1O6Zn1.ICSD_50808      | insulator  | insulator |
| Ca3Mn2O12Si3.ICSD_27388     | metal      | insulator |
| Ca3Mn2O7.ICSD_55666         | insulator  | insulator |
| Ca3Mn2O7.ICSD_55667         | metal      | insulator |
| Ca3Mn2O7.ICSD_96697         | insulator  | insulator |
| Ca3N1P1.ICSD_106350         | insulator  | insulator |
| Ca3N1Pb1.ICSD_106351        | metal      | metal     |
| Ca3N1Sb1.ICSD_106352        | metal      | metal     |
| Ca3N1Sn1.ICSD_106353        | metal      | metal     |
| Ca3N1Ti1.ICSD_411448        | metal      | metal     |
| Ca3N2.ICSD_162797           | insulator  | insulator |
| Ca3N2.ICSD_169726           | insulator  | insulator |
| Ca3N2.ICSD_169727           | insulator  | insulator |
| Ca3N2.ICSD_419865           | insulator  | insulator |
| Ca3N2.ICSD_50991            | insulator  | insulator |
| Ca3N3V1.ICSD_72118          | insulator  | insulator |
| Ca3Na1O6Ru1.ICSD_50020      | insulator  | insulator |
| Ca3Na2O9Ta2.ICSD_280154     | insulator  | insulator |
| Ca3Ni3Si2.ICSD_412410       | metal      | metal     |

Supplementary Table 237. Five-fold cross validated predictions for the metal/insulator classification (229/598).

| system                   | calculated | predicted |
|--------------------------|------------|-----------|
| Ca3O12Sc2Si3.ICSD_156537 | insulator  | insulator |
| Ca3O12Si3V2.ICSD_182067  | metal      | insulator |
| Ca3O12Te2Zn3.ICSD_64791  | insulator  | insulator |
| Ca3O12Te2Zn3.ICSD_67045  | insulator  | insulator |
| Ca3O1Pb1.ICSD_100789     | metal      | metal     |
| Ca3O1Sn1.ICSD_181084     | metal      | metal     |
| Ca3O5Si1.ICSD_22501      | insulator  | insulator |
| Ca3O5Si1.ICSD_81100      | insulator  | insulator |
| Ca3O6Te1.ICSD_35085      | insulator  | insulator |
| Ca3O6Ti2.ICSD_413876     | insulator  | insulator |
| Ca3O6U1.ICSD_23200       | insulator  | insulator |
| Ca3O8P2.ICSD_158736      | insulator  | insulator |
| Ca3O8V2.ICSD_412273      | insulator  | insulator |
| Ca3O9Si2Zr1.ICSD_79453   | insulator  | insulator |
| Ca3O9Si3.ICSD_87716      | insulator  | insulator |
| Ca3Pb1.ICSD_58921        | metal      | metal     |
| Ca3Pd1.ICSD_619504       | metal      | metal     |
| Ca3Pd2.ICSD_619502       | metal      | metal     |
| Ca3Rh4Sn13.ICSD_58931    | metal      | metal     |
| Ca3Ti1.ICSD_58943        | metal      | metal     |
| Ca3Ti5.ICSD_380324       | metal      | metal     |
| Ca3Zn1.ICSD_58948        | metal      | metal     |
| Ca4Cl6O1.ICSD_33883      | insulator  | insulator |
| Ca4Cu3P5Zn2.ICSD_89518   | insulator  | insulator |
| Ca4F1Na5O16P4.ICSD_20906 | insulator  | insulator |
| Ca4F2O7Si2.ICSD_64710    | insulator  | insulator |
| Ca4Ge1N4.ICSD_280251     | insulator  | insulator |
| Ca4Ge3Ni4.ICSD_421432    | metal      | metal     |
| Ca4Hg9.ICSD_107690       | metal      | metal     |
| Ca4Ir1O6.ICSD_81902      | metal      | insulator |
| Ca4Ir8P7.ICSD_413847     | metal      | metal     |
| Ca4Mn3O10.ICSD_85669     | insulator  | metal     |
| Ca4N4Ti1.ICSD_172879     | insulator  | insulator |
| Ca4O1P2.ICSD_68202       | insulator  | insulator |
| Ca4O1Sb2.ICSD_16353      | insulator  | insulator |
| Ca4O6Pd1.ICSD_88134      | insulator  | insulator |
| Ca4O6Pt1.ICSD_59252      | insulator  | insulator |
| Ca4Pd4Si3.ICSD_74358     | metal      | metal     |
| Ca5Cl1O12P3.ICSD_24237   | insulator  | insulator |
| Ca5Co2N4.ICSD_409920     | insulator  | insulator |
| Ca5F1O12P3.ICSD_52385    | insulator  | insulator |
| Ca5F1O12V3.ICSD_172997   | insulator  | insulator |
| Ca5Fe1Pb3.ICSD_240158    | metal      | metal     |
| Ca5Ga2Sb6.ICSD_36466     | metal      | insulator |
| Ca5Ga6O14.ICSD_63052     | insulator  | insulator |
| Ca5Ge3O11.ICSD_403085    | insulator  | insulator |
| Ca5Ge3.ICSD_181074       | metal      | metal     |
| Ca5Ge3.ICSD_181076       | metal      | metal     |
| Ca5H1O13P3.ICSD_180315   | insulator  | insulator |
| Ca5H1Sn3.ICSD_165190     | metal      | metal     |

Supplementary Table 238. Five-fold cross validated predictions for the metal/insulator classification (230/598).

| system                  | calculated | predicted |
|-------------------------|------------|-----------|
| Ca5Hg3.ICSD_106344      | metal      | metal     |
| Ca5In2Sb6.ICSD_36467    | insulator  | metal     |
| Ca5Ir1.ICSD_156887      | metal      | metal     |
| Ca5N4O2W1.ICSD_409475   | insulator  | insulator |
| Ca5N6Si2.ICSD_414462    | insulator  | insulator |
| Ca5O14Te3.ICSD_245873   | insulator  | insulator |
| Ca5P6Pd6.ICSD_79096     | metal      | metal     |
| Ca5P8.ICSD_74854        | insulator  | insulator |
| Ca5Pd2.ICSD_619503      | metal      | metal     |
| Ca5Pt2.ICSD_619513      | metal      | metal     |
| Ca5Pt3.ICSD_619514      | metal      | metal     |
| Ca5Sb3.ICSD_2065        | insulator  | metal     |
| Ca5Sb3.ICSD_619563      | metal      | metal     |
| Ca5Si3.ICSD_93699       | metal      | metal     |
| Ca5Zn3.ICSD_184360      | metal      | metal     |
| Ca6Cr2H1N6.ICSD_281462  | metal      | insulator |
| Ca6Cu2Sn7.ICSD_171243   | metal      | metal     |
| Ca6Fe1N5.ICSD_33796     | metal      | insulator |
| Ca6Ga1N5.ICSD_33795     | metal      | insulator |
| Ca6Ge1Li1.ICSD_108776   | metal      | metal     |
| Ca6H6O13Si2.ICSD_39725  | insulator  | insulator |
| Ca6Mn1N5.ICSD_80184     | insulator  | metal     |
| Ca7.8856.ICSD_163532    | metal      | metal     |
| Ca7Cl2H12.ICSD_420927   | insulator  | insulator |
| Ca7Ge1.ICSD_43321       | metal      | metal     |
| Ca7Ge6.ICSD_95171       | metal      | metal     |
| Ca7N9Nb1Si2.ICSD_414461 | insulator  | insulator |
| Ca7Ni4Sn13.ICSD_106354  | metal      | metal     |
| Ca7Sn6.ICSD_54618       | metal      | metal     |
| Ca8In3.ICSD_58909       | metal      | metal     |
| Ca9Sb9Zn4.ICSD_52787    | metal      | insulator |
| Cd11Ce1.ICSD_619646     | metal      | metal     |
| Cd11Eu1.ICSD_619836     | metal      | metal     |
| Cd11La1.ICSD_620068     | metal      | metal     |
| Cd11Na2.ICSD_421373     | metal      | metal     |
| Cd11Nd1.ICSD_620191     | metal      | metal     |
| Cd11Pr1.ICSD_620277     | metal      | metal     |
| Cd11Sr1.ICSD_620498     | metal      | metal     |
| Cd11Th1.ICSD_620560     | metal      | metal     |
| Cd13Cs1.ICSD_619730     | metal      | metal     |
| Cd13K1.ICSD_620061      | metal      | metal     |
| Cd13Rb1.ICSD_415888     | metal      | metal     |
| Cd17La2.ICSD_102006     | metal      | metal     |
| Cd1Ce1Cu1.ICSD_656594   | metal      | metal     |
| Cd1Ce1Ni4.ICSD_415194   | metal      | metal     |
| Cd1Ce1Pd1.ICSD_656600   | metal      | metal     |
| Cd1Ce1Ti1.ICSD_619670   | metal      | metal     |
| Cd1Ce1.ICSD_58949       | metal      | metal     |
| Cd1Ce1.ICSD_58950       | metal      | metal     |
| Cd1Ce2Pd2.ICSD_411010   | metal      | metal     |

Supplementary Table 239. Five-fold cross validated predictions for the metal/insulator classification (231/598).

| system                     | calculated | predicted |
|----------------------------|------------|-----------|
| Cd1Ce2Pt2.ICSD_411009      | metal      | metal     |
| Cd1Cl1H1O1.ICSD_26752      | insulator  | insulator |
| Cd1Cl1H1O1.ICSD_91087      | insulator  | insulator |
| Cd1Cl1K4O15V5.ICSD_404097  | insulator  | insulator |
| Cd1Cl1O15Rb4V5.ICSD_406783 | insulator  | insulator |
| Cd1Cl1O15Ti4V5.ICSD_406784 | insulator  | insulator |
| Cd1Cl1O3V1.ICSD_50788      | insulator  | insulator |
| Cd1Cl1S2Sb1.ICSD_171722    | insulator  | insulator |
| Cd1Cl2O2Pb2.ICSD_168248    | insulator  | insulator |
| Cd1Cl2.ICSD_62202          | insulator  | insulator |
| Cd1Cl3Cs1.ICSD_24484       | insulator  | insulator |
| Cd1Cl3Cs1.ICSD_4039        | insulator  | insulator |
| Cd1Cl3K1.ICSD_31357        | insulator  | insulator |
| Cd1Cl3Rb1.ICSD_200206      | insulator  | insulator |
| Cd1Cl3Rb1.ICSD_33552       | insulator  | insulator |
| Cd1Cl3Ti1.ICSD_39807       | insulator  | insulator |
| Cd1Cl4Cs2.ICSD_16576       | insulator  | insulator |
| Cd1Cl4Cu1H8O4.ICSD_280299  | insulator  | insulator |
| Cd1Cl4Na2.ICSD_69344       | insulator  | insulator |
| Cd1Cl4Rb2.ICSD_51168       | insulator  | insulator |
| Cd1Cl6K4.ICSD_60753        | insulator  | insulator |
| Cd1Cl6Rb4.ICSD_39622       | insulator  | insulator |
| Cd1Cl8Na6.ICSD_35070       | insulator  | insulator |
| Cd1Co1Dy4.ICSD_417044      | metal      | metal     |
| Cd1Co1F6Li1.ICSD_32731     | insulator  | insulator |
| Cd1Co1Ho4.ICSD_417045      | metal      | metal     |
| Cd1Co1La4.ICSD_419067      | metal      | metal     |
| Cd1Co1Tb4.ICSD_417043      | metal      | metal     |
| Cd1Co3N1.ICSD_422858       | metal      | metal     |
| Cd1Cr1F6.ICSD_10346        | insulator  | insulator |
| Cd1Cr1O4.ICSD_18118        | insulator  | insulator |
| Cd1Cr1O4.ICSD_18119        | insulator  | insulator |
| Cd1Cr2H14N4O8.ICSD_80187   | insulator  | insulator |
| Cd1Cr2O4.ICSD_37428        | insulator  | insulator |
| Cd1Cr2S4.ICSD_619692       | insulator  | insulator |
| Cd1Cr2Se4.ICSD_42022       | insulator  | insulator |
| Cd1Cr4Cs2H4O16.ICSD_154326 | insulator  | insulator |
| Cd1Cs1Dy1Te3.ICSD_173312   | insulator  | insulator |
| Cd1Cs1Er1Te3.ICSD_173313   | insulator  | insulator |
| Cd1Cs1F3.ICSD_290344       | insulator  | insulator |
| Cd1Cs1Ho1Te3.ICSD_173315   | insulator  | insulator |
| Cd1Cs1La1Te3.ICSD_173316   | insulator  | insulator |
| Cd1Cs1N3O6.ICSD_28649      | metal      | insulator |
| Cd1Cs1N3O6.ICSD_95536      | insulator  | insulator |
| Cd1Cs1Nd1Te3.ICSD_173318   | insulator  | insulator |
| Cd1Cs1Se3Y1.ICSD_281433    | insulator  | insulator |
| Cd1Cs1Tb1Te3.ICSD_173320   | insulator  | insulator |
| Cd1Cs2I4.ICSD_65654        | insulator  | insulator |
| Cd1Cs3I5.ICSD_403103       | insulator  | insulator |
| Cd1Cu1Dy1.ICSD_656598      | metal      | metal     |

Supplementary Table 240. Five-fold cross validated predictions for the metal/insulator classification (232/598).

| system                    | calculated | predicted |
|---------------------------|------------|-----------|
| Cd1Cu1F4.ICSD_73478       | insulator  | insulator |
| Cd1Cu1O4V1.ICSD_401454    | insulator  | insulator |
| Cd1Cu1Pr1.ICSD_656595     | metal      | metal     |
| Cd1Cu1Sb1.ICSD_52796      | metal      | metal     |
| Cd1Cu1Sb1.ICSD_619779     | metal      | metal     |
| Cd1Cu2Gd2.ICSD_419851     | metal      | metal     |
| Cd1Cu2Ge1S4.ICSD_26150    | insulator  | insulator |
| Cd1Cu2Ge1Se4.ICSD_619750  | metal      | metal     |
| Cd1Cu2Ge1Te4.ICSD_165094  | metal      | metal     |
| Cd1Cu2Nd2.ICSD_261436     | metal      | metal     |
| Cd1Cu2Nd2.ICSD_421934     | metal      | metal     |
| Cd1Cu2S4Si1.ICSD_619770   | insulator  | insulator |
| Cd1Cu2S4Sn1.ICSD_619774   | metal      | insulator |
| Cd1Cu2Se4Si1.ICSD_619783  | insulator  | insulator |
| Cd1Cu2Se4Sn1.ICSD_95118   | metal      | metal     |
| Cd1Cu2Si1Te4.ICSD_656151  | insulator  | metal     |
| Cd1Cu2Sn1Te4.ICSD_656157  | metal      | metal     |
| Cd1Cu2Yb5.ICSD_423860     | metal      | metal     |
| Cd1Cu2Zr1.ICSD_58961      | metal      | metal     |
| Cd1Cu2.ICSD_150582        | metal      | metal     |
| Cd1Cu2.ICSD_58955         | metal      | metal     |
| Cd1Cu3O12Ti4.ICSD_39467   | insulator  | insulator |
| Cd1Cu4Er1.ICSD_415196     | metal      | metal     |
| Cd1Cu4Ho1.ICSD_415195     | metal      | metal     |
| Cd1Cu4Yb1.ICSD_415198     | metal      | metal     |
| Cd1Dy1Ga1.ICSD_619800     | metal      | metal     |
| Cd1Dy1Ni4.ICSD_185112     | metal      | metal     |
| Cd1Dy1.ICSD_58962         | metal      | metal     |
| Cd1Dy2Ge2.ICSD_424175     | metal      | metal     |
| Cd1Dy2Pd2.ICSD_157388     | metal      | metal     |
| Cd1Dy2S4.ICSD_52798       | insulator  | insulator |
| Cd1Dy2Se4.ICSD_246499     | insulator  | insulator |
| Cd1Dy2Te4.ICSD_619806     | metal      | insulator |
| Cd1Dy4Rh1.ICSD_417047     | metal      | metal     |
| Cd1Er1Ga1.ICSD_619819     | metal      | metal     |
| Cd1Er1Ni4.ICSD_185114     | metal      | metal     |
| Cd1Er1.ICSD_619817        | metal      | metal     |
| Cd1Er2Ge2.ICSD_424177     | metal      | metal     |
| Cd1Er2S4.ICSD_100518      | insulator  | insulator |
| Cd1Er2Se4.ICSD_619834     | insulator  | insulator |
| Cd1Eu1Pd1.ICSD_412311     | metal      | metal     |
| Cd1Eu1Sn1.ICSD_619856     | metal      | metal     |
| Cd1Eu1.ICSD_619835        | metal      | metal     |
| Cd1F1H1O1.ICSD_27754      | insulator  | insulator |
| Cd1F2.ICSD_183501         | insulator  | insulator |
| Cd1F2.ICSD_28864          | insulator  | insulator |
| Cd1F3K1.ICSD_44788        | insulator  | insulator |
| Cd1F3Rb1.ICSD_49587       | insulator  | insulator |
| Cd1F5Mn1.ICSD_69633       | insulator  | insulator |
| Cd1F6H12O6Sn2.ICSD_166590 | insulator  | insulator |

Supplementary Table 241. Five-fold cross validated predictions for the metal/insulator classification (233/598).

| system                   | calculated | predicted |
|--------------------------|------------|-----------|
| Cd1F6Pd1.ICSD_26166      | insulator  | insulator |
| Cd1F6Pt1.ICSD_37445      | insulator  | insulator |
| Cd1F6Rh1.ICSD_42162      | insulator  | insulator |
| Cd1F6Sn1.ICSD_25017      | insulator  | insulator |
| Cd1F6Tb1.ICSD_59987      | metal      | insulator |
| Cd1F6Ti1.ICSD_16233      | insulator  | insulator |
| Cd1F7Rb1Zr1.ICSD_245783  | insulator  | insulator |
| Cd1F7Tl1Zr1.ICSD_245784  | insulator  | insulator |
| Cd1Fe2O4.ICSD_619857     | insulator  | insulator |
| Cd1Ga1In1S4.ICSD_20785   | insulator  | metal     |
| Cd1Ga1In1S4.ICSD_2465    | metal      | insulator |
| Cd1Ga1Nd1.ICSD_619868    | metal      | metal     |
| Cd1Ga1Pr1.ICSD_619870    | metal      | metal     |
| Cd1Ga2O4.ICSD_159739     | insulator  | insulator |
| Cd1Ga2S4.ICSD_619878     | insulator  | insulator |
| Cd1Ga2Se4.ICSD_30908     | insulator  | insulator |
| Cd1Ga2Te4.ICSD_656264    | insulator  | insulator |
| Cd1Gd1Pd1.ICSD_411775    | metal      | metal     |
| Cd1Gd1.ICSD_108212       | metal      | metal     |
| Cd1Gd2Ge2.ICSD_424173    | metal      | metal     |
| Cd1Gd2Pd2.ICSD_157387    | metal      | metal     |
| Cd1Gd4Ir1.ICSD_419612    | metal      | metal     |
| Cd1Gd4Ni1.ICSD_419610    | metal      | metal     |
| Cd1Gd4Pd1.ICSD_419611    | metal      | metal     |
| Cd1Gd4Pt1.ICSD_419613    | metal      | metal     |
| Cd1Ge1Li2O4.ICSD_20031   | insulator  | insulator |
| Cd1Ge1Li2S4.ICSD_249872  | insulator  | insulator |
| Cd1Ge1Li2.ICSD_52803     | metal      | metal     |
| Cd1Ge1O3.ICSD_23531      | insulator  | insulator |
| Cd1Ge1O3.ICSD_30971      | insulator  | insulator |
| Cd1Ge1O3.ICSD_77134      | insulator  | insulator |
| Cd1Ge1P2.ICSD_52804      | metal      | metal     |
| Cd1Ge1P2.ICSD_600509     | insulator  | insulator |
| Cd1Ge1Sr1.ICSD_619960    | metal      | metal     |
| Cd1Ge1Te4Ti2.ICSD_172502 | insulator  | insulator |
| Cd1Ge1Yb1.ICSD_619963    | metal      | metal     |
| Cd1Ge2Ho2.ICSD_424176    | metal      | metal     |
| Cd1Ge2Nd2.ICSD_424171    | metal      | metal     |
| Cd1Ge2O5.ICSD_23039      | insulator  | insulator |
| Cd1Ge2Pr2.ICSD_424170    | metal      | metal     |
| Cd1Ge2Tb2.ICSD_424174    | metal      | metal     |
| Cd1Ge2Tm2.ICSD_424178    | metal      | metal     |
| Cd1Ge2Y2.ICSD_424169     | metal      | metal     |
| Cd1Ge2Yb2.ICSD_424179    | metal      | metal     |
| Cd1H10N4O8S2.ICSD_240376 | insulator  | insulator |
| Cd1H1N1O4.ICSD_35355     | insulator  | insulator |
| Cd1H1O3P1.ICSD_240864    | insulator  | insulator |
| Cd1H2I3O1Rb1.ICSD_809    | insulator  | insulator |
| Cd1H2O2.ICSD_165225      | insulator  | insulator |
| Cd1H2O4Se1.ICSD_59347    | insulator  | insulator |

Supplementary Table 242. Five-fold cross validated predictions for the metal/insulator classification (234/598).

| system                    | calculated | predicted |
|---------------------------|------------|-----------|
| Cd1H2O5Se1.ICSD_26897     | insulator  | insulator |
| Cd1H3N1O5.ICSD_36557      | insulator  | insulator |
| Cd1H4Mg1N4O10.ICSD_64618  | insulator  | insulator |
| Cd1H4Na2O10S2.ICSD_98681  | insulator  | insulator |
| Cd1H4Na2O10Se2.ICSD_98682 | insulator  | insulator |
| Cd1H4O4P2.ICSD_171022     | insulator  | insulator |
| Cd1H6N1O5P1.ICSD_200085   | insulator  | insulator |
| Cd1H6O7P2.ICSD_1382       | insulator  | insulator |
| Cd1Hf1.ICSD_619964        | metal      | metal     |
| Cd1Hf2.ICSD_619965        | metal      | metal     |
| Cd1Hg1O2.ICSD_74848       | insulator  | insulator |
| Cd1Hg2O6S1.ICSD_413287    | insulator  | insulator |
| Cd1Hg2O6Se1.ICSD_413288   | insulator  | insulator |
| Cd1Hg2Ti1.ICSD_58987      | metal      | metal     |
| Cd1Hg2.ICSD_58982         | metal      | metal     |
| Cd1Ho1Ni4.ICSD_185113     | metal      | metal     |
| Cd1Ho1.ICSD_619987        | metal      | metal     |
| Cd1Ho2S4.ICSD_620002      | insulator  | insulator |
| Cd1Ho2Se4.ICSD_620011     | insulator  | insulator |
| Cd1Ho4Rh1.ICSD_417048     | metal      | metal     |
| Cd1I2O6.ICSD_1397         | insulator  | insulator |
| Cd1I2O6.ICSD_415011       | insulator  | insulator |
| Cd1I2.ICSD_108921         | insulator  | insulator |
| Cd1I2.ICSD_108924         | insulator  | insulator |
| Cd1I2.ICSD_108926         | insulator  | insulator |
| Cd1I2.ICSD_20745          | insulator  | insulator |
| Cd1I2.ICSD_27292          | metal      | insulator |
| Cd1I2.ICSD_28384          | insulator  | insulator |
| Cd1I2.ICSD_37377          | insulator  | insulator |
| Cd1I2.ICSD_37378          | insulator  | insulator |
| Cd1I2.ICSD_38116          | insulator  | insulator |
| Cd1I2.ICSD_42173          | insulator  | insulator |
| Cd1I2.ICSD_42198          | insulator  | insulator |
| Cd1I2.ICSD_42205          | insulator  | insulator |
| Cd1I2.ICSD_42207          | insulator  | insulator |
| Cd1I2.ICSD_42210          | insulator  | insulator |
| Cd1I2.ICSD_42227          | insulator  | insulator |
| Cd1I2.ICSD_42233          | insulator  | insulator |
| Cd1I2.ICSD_42258          | insulator  | insulator |
| Cd1I2.ICSD_42262          | insulator  | insulator |
| Cd1I2.ICSD_42268          | insulator  | insulator |
| Cd1I2.ICSD_42269          | insulator  | insulator |
| Cd1I2.ICSD_43443          | insulator  | insulator |
| Cd1I2.ICSD_43852          | insulator  | insulator |
| Cd1I2.ICSD_44792          | insulator  | insulator |
| Cd1I2.ICSD_44793          | insulator  | insulator |
| Cd1I2.ICSD_9025           | insulator  | insulator |
| Cd1I2.ICSD_9190           | insulator  | insulator |
| Cd1I4S8Sb6.ICSD_27733     | insulator  | insulator |
| Cd1I6In4.ICSD_66290       | insulator  | insulator |

Supplementary Table 243. Five-fold cross validated predictions for the metal/insulator classification (235/598).

| system                  | calculated | predicted |
|-------------------------|------------|-----------|
| Cd1I6Ti4.ICSD_66292     | insulator  | insulator |
| Cd1In1S2.ICSD_52810     | metal      | metal     |
| Cd1In2O4.ICSD_159740    | insulator  | insulator |
| Cd1In2O4.ICSD_52389     | insulator  | insulator |
| Cd1In2S4.ICSD_601181    | insulator  | insulator |
| Cd1In2Se4.ICSD_151954   | insulator  | insulator |
| Cd1In2Se4.ICSD_151955   | insulator  | insulator |
| Cd1In2Se4.ICSD_52811    | metal      | insulator |
| Cd1In2Se4.ICSD_620049   | insulator  | insulator |
| Cd1In2Te4.ICSD_25651    | insulator  | insulator |
| Cd1Ir1O6Sr3.ICSD_81904  | insulator  | insulator |
| Cd1K1N3O6.ICSD_28647    | insulator  | metal     |
| Cd1K1N3O6.ICSD_95538    | insulator  | insulator |
| Cd1K1Sb1.ICSD_620064    | metal      | insulator |
| Cd1K2N12.ICSD_659621    | insulator  | insulator |
| Cd1K2O2.ICSD_25004      | insulator  | insulator |
| Cd1K2O7P2.ICSD_12117    | insulator  | insulator |
| Cd1K2Pb1.ICSD_10041     | metal      | metal     |
| Cd1K2Sb2Sr1.ICSD_422273 | insulator  | metal     |
| Cd1K2Se4Sn1.ICSD_185468 | insulator  | insulator |
| Cd1K2Sn1.ICSD_620066    | metal      | metal     |
| Cd1K4P2.ICSD_61084      | insulator  | insulator |
| Cd1K6O4.ICSD_62053      | insulator  | insulator |
| Cd1K6Te4.ICSD_420087    | insulator  | insulator |
| Cd1La1Pd1.ICSD_656599   | metal      | metal     |
| Cd1La1Ti1.ICSD_620091   | metal      | metal     |
| Cd1La1.ICSD_102005      | metal      | metal     |
| Cd1La1.ICSD_601467      | metal      | metal     |
| Cd1La2Rh2.ICSD_107389   | metal      | metal     |
| Cd1La4Ru1.ICSD_419069   | metal      | metal     |
| Cd1Li1O4P1.ICSD_65050   | insulator  | insulator |
| Cd1Li1O4P1.ICSD_71862   | insulator  | insulator |
| Cd1Li1P1.ICSD_52813     | metal      | metal     |
| Cd1Li1.ICSD_620092      | metal      | metal     |
| Cd1Li2Pb1.ICSD_102015   | metal      | metal     |
| Cd1Li2Pb1.ICSD_102016   | metal      | metal     |
| Cd1Li2S4Sn1.ICSD_249873 | insulator  | insulator |
| Cd1Li2Sb1.ICSD_52815    | metal      | metal     |
| Cd1Li2Sn1.ICSD_108223   | metal      | metal     |
| Cd1Lu1Ni4.ICSD_423941   | metal      | metal     |
| Cd1Lu1.ICSD_620119      | metal      | metal     |
| Cd1Lu2S4.ICSD_620127    | insulator  | insulator |
| Cd1Lu2Se4.ICSD_620129   | insulator  | insulator |
| Cd1Mg1.ICSD_102022      | metal      | metal     |
| Cd1Mg3.ICSD_620134      | metal      | metal     |
| Cd1Mn2O4.ICSD_24258     | insulator  | insulator |
| Cd1Mo1O4.ICSD_30371     | insulator  | insulator |
| Cd1Mo1O6P1.ICSD_82090   | insulator  | insulator |
| Cd1Mo1O6Te1.ICSD_93794  | insulator  | insulator |
| Cd1Mo3O12Th1.ICSD_26012 | insulator  | insulator |

Supplementary Table 244. Five-fold cross validated predictions for the metal/insulator classification (236/598).

| system                   | calculated | predicted |
|--------------------------|------------|-----------|
| Cd1Mo6S8_ICSD_620169     | metal      | metal     |
| Cd1Mo6Se8_ICSD_620174    | metal      | metal     |
| Cd1N1Ni3_ICSD_422859     | metal      | metal     |
| Cd1N1_ICSD_183197        | metal      | metal     |
| Cd1N1_ICSD_185576        | metal      | metal     |
| Cd1N1_ICSD_186891        | metal      | metal     |
| Cd1N1_ICSD_186892        | metal      | metal     |
| Cd1N1_ICSD_186894        | metal      | metal     |
| Cd1N2O6_ICSD_297         | insulator  | insulator |
| Cd1N3O6Rb1_ICSD_28648    | metal      | insulator |
| Cd1N3O6Rb1_ICSD_95537    | insulator  | insulator |
| Cd1N3O6Ti1_ICSD_28650    | insulator  | metal     |
| Cd1N3O6Ti1_ICSD_95539    | insulator  | insulator |
| Cd1Na1O4P1_ICSD_10153    | insulator  | insulator |
| Cd1Na1O4P1_ICSD_6210     | insulator  | insulator |
| Cd1Na1O4V1_ICSD_151411   | insulator  | insulator |
| Cd1Na1Sb1_ICSD_12159     | metal      | insulator |
| Cd1Na2O8S2_ICSD_173033   | insulator  | insulator |
| Cd1Na2Pb1_ICSD_102033    | metal      | metal     |
| Cd1Na2S4Sn1_ICSD_281233  | insulator  | insulator |
| Cd1Na2Sb2Yb1_ICSD_422274 | insulator  | metal     |
| Cd1Na2Sn1_ICSD_102034    | metal      | metal     |
| Cd1Na4P2_ICSD_67262      | insulator  | insulator |
| Cd1Nd1Ni4_ICSD_185109    | metal      | metal     |
| Cd1Nd1Ti1_ICSD_620196    | metal      | metal     |
| Cd1Nd1_ICSD_102036       | metal      | metal     |
| Cd1Nd1_ICSD_186649       | metal      | metal     |
| Cd1Nd2Ni2_ICSD_414597    | metal      | metal     |
| Cd1Ni1_ICSD_102038       | metal      | metal     |
| Cd1Ni1_ICSD_620198       | metal      | metal     |
| Cd1Ni2Pr2_ICSD_414596    | metal      | metal     |
| Cd1Ni4Sc1_ICSD_185106    | metal      | metal     |
| Cd1Ni4Tb1_ICSD_185111    | metal      | metal     |
| Cd1Ni4Y1_ICSD_423939     | metal      | metal     |
| Cd1Ni4Yb1_ICSD_185116    | metal      | metal     |
| Cd1O14P4V2_ICSD_74554    | insulator  | insulator |
| Cd1O1_ICSD_161837        | metal      | insulator |
| Cd1O1_ICSD_181735        | metal      | metal     |
| Cd1O2Rb2_ICSD_62054      | insulator  | insulator |
| Cd1O2_ICSD_36151         | insulator  | insulator |
| Cd1O3S1_ICSD_62640       | insulator  | insulator |
| Cd1O3S1_ICSD_62641       | insulator  | insulator |
| Cd1O3Se1_ICSD_75273      | insulator  | insulator |
| Cd1O3Se1_ICSD_75274      | insulator  | insulator |
| Cd1O3Sn1_ICSD_180401     | insulator  | insulator |
| Cd1O3Te1_ICSD_60067      | insulator  | insulator |
| Cd1O3Ti1_ICSD_15989      | insulator  | insulator |
| Cd1O3Ti1_ICSD_16686      | insulator  | insulator |
| Cd1O3Ti1_ICSD_33667      | metal      | insulator |
| Cd1O3Ti1_ICSD_62151      | insulator  | insulator |

Supplementary Table 245. Five-fold cross validated predictions for the metal/insulator classification (237/598).

| system                  | calculated | predicted |
|-------------------------|------------|-----------|
| Cd1O3V1_ICSD_88387      | insulator  | insulator |
| Cd1O4Pd3_ICSD_16539     | metal      | metal     |
| Cd1O4Rh2_ICSD_28954     | insulator  | insulator |
| Cd1O4S1_ICSD_130014     | insulator  | insulator |
| Cd1O4S1_ICSD_60571      | insulator  | insulator |
| Cd1O4S1_ICSD_9723       | insulator  | insulator |
| Cd1O4U1_ICSD_20504      | insulator  | insulator |
| Cd1O4U1_ICSD_26427      | insulator  | insulator |
| Cd1O4U1_ICSD_26428      | insulator  | insulator |
| Cd1O4V2_ICSD_28961      | metal      | metal     |
| Cd1O4W1_ICSD_186159     | insulator  | insulator |
| Cd1O5Se2_ICSD_75230     | insulator  | insulator |
| Cd1O6P2_ICSD_15861      | insulator  | insulator |
| Cd1O6P2_ICSD_8070       | insulator  | insulator |
| Cd1O6Pt1Sr3_ICSD_280518 | insulator  | insulator |
| Cd1O6Pt3_ICSD_35407     | insulator  | insulator |
| Cd1O6Sb2_ICSD_181929    | insulator  | insulator |
| Cd1O6Sr2W1_ICSD_245684  | insulator  | insulator |
| Cd1O6Sr2W1_ICSD_71839   | insulator  | insulator |
| Cd1O6Sr2W1_ICSD_71840   | insulator  | insulator |
| Cd1O6V2_ICSD_15926      | insulator  | insulator |
| Cd1O7S2_ICSD_63067      | insulator  | insulator |
| Cd1P1Pd5_ICSD_620223    | metal      | metal     |
| Cd1P1Pt5_ICSD_620224    | metal      | metal     |
| Cd1P1S3_ICSD_61393      | insulator  | insulator |
| Cd1P1S3_ICSD_80875      | insulator  | insulator |
| Cd1P2Rb2Se6_ICSD_50959  | insulator  | insulator |
| Cd1P2Si1_ICSD_44260     | insulator  | insulator |
| Cd1P2Sn1_ICSD_620246    | metal      | insulator |
| Cd1P2_ICSD_26199        | insulator  | insulator |
| Cd1P2_ICSD_620210       | insulator  | insulator |
| Cd1P2_ICSD_62336        | insulator  | insulator |
| Cd1P4_ICSD_25605        | insulator  | insulator |
| Cd1Pb1Yb1_ICSD_620264   | metal      | metal     |
| Cd1Pd1Pr1_ICSD_106366   | metal      | metal     |
| Cd1Pd1_ICSD_620267      | metal      | metal     |
| Cd1Pd2Pr2_ICSD_157385   | metal      | metal     |
| Cd1Pd2Sm2_ICSD_157386   | metal      | metal     |
| Cd1Pd2Yb2_ICSD_157389   | metal      | metal     |
| Cd1Pd5Se1_ICSD_620273   | metal      | metal     |
| Cd1Pr1Ti1_ICSD_620292   | metal      | metal     |
| Cd1Pr1_ICSD_102049      | metal      | metal     |
| Cd1Pr1_ICSD_182833      | metal      | metal     |
| Cd1Pt1_ICSD_620297      | metal      | metal     |
| Cd1Pt2Zn1_ICSD_102057   | metal      | metal     |
| Cd1Rh1Tb4_ICSD_417046   | metal      | metal     |
| Cd1Ru1Y4_ICSD_419070    | metal      | metal     |
| Cd1S1_ICSD_31075        | insulator  | insulator |
| Cd1S1_ICSD_600773       | insulator  | insulator |
| Cd1S1_ICSD_60629        | insulator  | insulator |

Supplementary Table 246. Five-fold cross validated predictions for the metal/insulator classification (238/598).

| system                   | calculated | predicted |
|--------------------------|------------|-----------|
| Cd1S1.ICSD.620315        | insulator  | insulator |
| Cd1S2Ta1.ICSD.620350     | metal      | metal     |
| Cd1S2Ti1.ICSD.164949     | metal      | metal     |
| Cd1S2Ti1.ICSD.20320      | metal      | metal     |
| Cd1S2.ICSD.620305        | insulator  | insulator |
| Cd1S4Sc2.ICSD.94994      | insulator  | insulator |
| Cd1S4Tm2.ICSD.620360     | metal      | insulator |
| Cd1S4Y2.ICSD.620371      | insulator  | insulator |
| Cd1S4Yb2.ICSD.37409      | metal      | metal     |
| Cd1Sb1Ti1.ICSD.9572      | metal      | metal     |
| Cd1Sb1.ICSD.620395       | insulator  | metal     |
| Cd1Sb2Sn1.ICSD.44259     | metal      | metal     |
| Cd1Sb2Yb2.ICSD.173171    | metal      | metal     |
| Cd1Sc1.ICSD.620407       | metal      | metal     |
| Cd1Sc2Se4.ICSD.620411    | insulator  | insulator |
| Cd1Se1.ICSD.180931       | insulator  | insulator |
| Cd1Se1.ICSD.181026       | metal      | insulator |
| Cd1Se1.ICSD.415785       | insulator  | insulator |
| Cd1Se2Ti1.ICSD.620451    | metal      | insulator |
| Cd1Se2.ICSD.620416       | insulator  | insulator |
| Cd1Se4Y2.ICSD.620457     | insulator  | insulator |
| Cd1Se4Yb2.ICSD.620459    | metal      | metal     |
| Cd1Sm1Ti1.ICSD.620482    | metal      | metal     |
| Cd1Sm1.ICSD.102063       | metal      | metal     |
| Cd1Sn1Te4Ti2.ICSD.172503 | insulator  | insulator |
| Cd1Sn1Yb1.ICSD.620489    | metal      | metal     |
| Cd1Sr1.ICSD.102066       | metal      | metal     |
| Cd1Tb1.ICSD.108236       | metal      | metal     |
| Cd1Te1.ICSD.108237       | metal      | metal     |
| Cd1Te1.ICSD.150941       | insulator  | insulator |
| Cd1Te1.ICSD.246692       | metal      | insulator |
| Cd1Te1.ICSD.620514       | insulator  | insulator |
| Cd1Te1.ICSD.620526       | metal      | metal     |
| Cd1Te1.ICSD.67863        | insulator  | metal     |
| Cd1Te2Ti1.ICSD.620548    | metal      | metal     |
| Cd1Te2Zn1.ICSD.181019    | insulator  | insulator |
| Cd1Te4Ti2.ICSD.620549    | metal      | insulator |
| Cd1Ti1.ICSD.102076       | metal      | metal     |
| Cd1Ti2.ICSD.102077       | metal      | metal     |
| Cd1Tm1.ICSD.620576       | insulator  | metal     |
| Cd1Tm1.ICSD.620577       | metal      | metal     |
| Cd1V3.ICSD.102082        | metal      | metal     |
| Cd1V3.ICSD.620584        | metal      | metal     |
| Cd1Y1.ICSD.188181        | metal      | metal     |
| Cd1Yb1.ICSD.620602       | metal      | metal     |
| Cd1Zr1.ICSD.620612       | metal      | metal     |
| Cd1Zr2.ICSD.620613       | metal      | metal     |
| Cd1.ICSD.53770           | metal      | metal     |
| Cd23Th6.ICSD.620562      | metal      | metal     |
| Cd2Ce1.ICSD.58951        | metal      | metal     |

Supplementary Table 247. Five-fold cross validated predictions for the metal/insulator classification (239/598).

| system                  | calculated | predicted |
|-------------------------|------------|-----------|
| Cd2Ce1.ICSD.619647      | metal      | metal     |
| Cd2Ce1.ICSD.619656      | metal      | metal     |
| Cd2Cl1H3O3.ICSD.39285   | insulator  | insulator |
| Cd2Cl1P3.ICSD.100818    | insulator  | insulator |
| Cd2Cl1P3.ICSD.100879    | insulator  | insulator |
| Cd2Cl2P1.ICSD.412647    | insulator  | insulator |
| Cd2Cs5Ti11.ICSD.165200  | metal      | metal     |
| Cd2Cu1Er1.ICSD.99139    | metal      | metal     |
| Cd2Cu1O8P2.ICSD.249777  | insulator  | insulator |
| Cd2Dy1.ICSD.58964       | metal      | metal     |
| Cd2Dy1.ICSD.619796      | metal      | metal     |
| Cd2Er1.ICSD.58968       | metal      | metal     |
| Cd2Er1.ICSD.619813      | metal      | metal     |
| Cd2Er1.ICSD.619816      | metal      | metal     |
| Cd2Eu1P2.ICSD.78987     | insulator  | metal     |
| Cd2Eu1Sb2.ICSD.78988    | metal      | metal     |
| Cd2Eu1.ICSD.58972       | metal      | metal     |
| Cd2F1O4P1.ICSD.2361     | insulator  | insulator |
| Cd2F8Tb1.ICSD.86146     | metal      | insulator |
| Cd2Ga2Sr1.ICSD.370021   | metal      | metal     |
| Cd2Gd1.ICSD.58976       | metal      | metal     |
| Cd2Gd1.ICSD.619915      | metal      | metal     |
| Cd2Ge2Sr1.ICSD.25331    | metal      | metal     |
| Cd2H2O6S1.ICSD.652      | insulator  | insulator |
| Cd2H4O4.ICSD.40186      | insulator  | insulator |
| Cd2Hg1.ICSD.58983       | metal      | metal     |
| Cd2Ho1.ICSD.58989       | metal      | metal     |
| Cd2Ho1.ICSD.619991      | metal      | metal     |
| Cd2I1P3.ICSD.100816     | insulator  | insulator |
| Cd2I1P3.ICSD.100881     | insulator  | insulator |
| Cd2I7Ti3.ICSD.63340     | insulator  | insulator |
| Cd2Ir1Na3O6.ICSD.404507 | insulator  | insulator |
| Cd2K2O12S3.ICSD.200291  | insulator  | insulator |
| Cd2K2O12S3.ICSD.40279   | insulator  | insulator |
| Cd2K2O3.ICSD.16223      | insulator  | insulator |
| Cd2La1Pd1.ICSD.417029   | metal      | metal     |
| Cd2La1.ICSD.601468      | metal      | metal     |
| Cd2La1.ICSD.620079      | metal      | metal     |
| Cd2Lu1.ICSD.620120      | metal      | metal     |
| Cd2Mn3O8.ICSD.16957     | insulator  | insulator |
| Cd2Na14O9.ICSD.2195     | insulator  | insulator |
| Cd2Na4O10Si3.ICSD.20185 | insulator  | insulator |
| Cd2Nb2O7.ICSD.169000    | insulator  | insulator |
| Cd2Nb2O7.ICSD.33672     | insulator  | insulator |
| Cd2Nb2O7.ICSD.75601     | insulator  | insulator |
| Cd2Nd1Pd1.ICSD.425064   | metal      | metal     |
| Cd2Nd1.ICSD.620185      | metal      | metal     |
| Cd2O12Rb2S3.ICSD.281315 | insulator  | insulator |
| Cd2O12S3Ti2.ICSD.66714  | insulator  | insulator |
| Cd2O4Si1.ICSD.161025    | insulator  | insulator |

Supplementary Table 248. Five-fold cross validated predictions for the metal/insulator classification (240/598).

| system                  | calculated | predicted |
|-------------------------|------------|-----------|
| Cd2O4Si1.ICSD_50531     | insulator  | insulator |
| Cd2O4Sn1.ICSD_69297     | insulator  | insulator |
| Cd2O5U1.ICSD_166737     | insulator  | insulator |
| Cd2O7Os2.ICSD_155769    | metal      | metal     |
| Cd2O7P2.ICSD_23542      | insulator  | insulator |
| Cd2O7Re2.ICSD_28445     | metal      | metal     |
| Cd2O7Ru2.ICSD_86773     | metal      | metal     |
| Cd2O7Sb2.ICSD_165168    | insulator  | insulator |
| Cd2O7Sb2.ICSD_77064     | insulator  | insulator |
| Cd2O7Ta2.ICSD_77061     | insulator  | insulator |
| Cd2O7Tc2.ICSD_180008    | metal      | insulator |
| Cd2O7V2.ICSD_24191      | insulator  | insulator |
| Cd2P2Se6.ICSD_620234    | insulator  | insulator |
| Cd2P2Sr1.ICSD_30912     | insulator  | insulator |
| Cd2Pd1Sr1.ICSD_425494   | metal      | metal     |
| Cd2Pr1.ICSD_102050      | metal      | metal     |
| Cd2Pr1.ICSD_601470      | metal      | metal     |
| Cd2Pr1.ICSD_620282      | metal      | metal     |
| Cd2Sb2Sr1.ICSD_12153    | insulator  | metal     |
| Cd2Sb2Yb1.ICSD_78989    | insulator  | metal     |
| Cd2Sm1.ICSD_102065      | metal      | metal     |
| Cd2Sm1.ICSD_620476      | metal      | metal     |
| Cd2Sr1.ICSD_420579      | metal      | metal     |
| Cd2Tb1.ICSD_102069      | metal      | metal     |
| Cd2Tb1.ICSD_620503      | metal      | metal     |
| Cd2Th1.ICSD_15446       | metal      | metal     |
| Cd2Tm1.ICSD_102079      | metal      | metal     |
| Cd2Y1.ICSD_102084       | metal      | metal     |
| Cd2Yb1.ICSD_620601      | metal      | metal     |
| Cd2Zr3.ICSD_102092      | metal      | metal     |
| Cd32K6.ICSD_421370      | metal      | metal     |
| Cd3Ce1.ICSD_619645      | metal      | metal     |
| Cd3Cl2O2.ICSD_300028    | insulator  | insulator |
| Cd3Cl3P1.ICSD_201025    | insulator  | insulator |
| Cd3Cs2K2O5.ICSD_60895   | insulator  | insulator |
| Cd3Dy1.ICSD_58965       | metal      | metal     |
| Cd3Er1.ICSD_2834        | metal      | metal     |
| Cd3Gd1.ICSD_58977       | metal      | metal     |
| Cd3Ge3O12Sc2.ICSD_20216 | insulator  | insulator |
| Cd3Ho1.ICSD_58990       | metal      | metal     |
| Cd3In1.ICSD_109285      | metal      | metal     |
| Cd3K2Se4.ICSD_710063    | insulator  | insulator |
| Cd3Mg1.ICSD_102027      | metal      | metal     |
| Cd3N2.ICSD_416908       | metal      | metal     |
| Cd3Na2O10Si3.ICSD_28416 | insulator  | insulator |
| Cd3Na2O14P4.ICSD_93593  | insulator  | insulator |
| Cd3Nb1.ICSD_102035      | metal      | metal     |
| Cd3O10Se3.ICSD_280951   | insulator  | insulator |
| Cd3O5Si1.ICSD_23170     | insulator  | insulator |
| Cd3O6Te1.ICSD_35084     | insulator  | insulator |

Supplementary Table 249. Five-fold cross validated predictions for the metal/insulator classification (241/598).

| system                   | calculated | predicted |
|--------------------------|------------|-----------|
| Cd3O8P2.ICSD_20202       | insulator  | insulator |
| Cd3P2.ICSD_24488         | metal      | metal     |
| Cd3P2.ICSD_620218        | metal      | metal     |
| Cd3P2.ICSD_620219        | metal      | metal     |
| Cd3P3Pr1.ICSD_88676      | metal      | metal     |
| Cd3Sb3Ti2.ICSD_76500     | insulator  | metal     |
| Cd3Sc1.ICSD_102062       | metal      | metal     |
| Cd3Sr5.ICSD_106369       | metal      | metal     |
| Cd3Tb1.ICSD_102070       | metal      | metal     |
| Cd3Tb1.ICSD_102071       | metal      | metal     |
| Cd3Th1.ICSD_620565       | metal      | metal     |
| Cd3Y1.ICSD_102085        | metal      | metal     |
| Cd3Y1.ICSD_2835          | metal      | metal     |
| Cd3Zr1.ICSD_102093       | metal      | metal     |
| Cd41Ir8.ICSD_189255      | metal      | metal     |
| Cd4Cl3P2.ICSD_50938      | insulator  | insulator |
| Cd4Cl6O13Te6.ICSD_171334 | insulator  | insulator |
| Cd4F6O1.ICSD_74031       | insulator  | insulator |
| Cd4Ge1S6.ICSD_26214      | insulator  | insulator |
| Cd4Ge1Se6.ICSD_600752    | insulator  | insulator |
| Cd4I3P2.ICSD_23307       | insulator  | insulator |
| Cd4I3Sb2.ICSD_80589      | insulator  | insulator |
| Cd4K1O12V3.ICSD_807      | insulator  | insulator |
| Cd4K1P3.ICSD_262033      | metal      | insulator |
| Cd4K6Se13Sn3.ICSD_413739 | insulator  | insulator |
| Cd4La6Pd13.ICSD_421178   | metal      | metal     |
| Cd4N12P6S1.ICSD_71019    | insulator  | insulator |
| Cd4Pd13Pr6.ICSD_417049   | metal      | metal     |
| Cd4S6Si1.ICSD_620339     | insulator  | insulator |
| Cd4Se6Si1.ICSD_96265     | insulator  | insulator |
| Cd5Cl1O12P3.ICSD_130     | insulator  | insulator |
| Cd5Cu2.ICSD_130027       | metal      | metal     |
| Cd5Th1.ICSD_620559       | metal      | metal     |
| Cd6Sb12Sr11.ICSD_413701  | insulator  | metal     |
| Cd6Sb5.ICSD_52832        | metal      | metal     |
| Cd7Cl6P4.ICSD_38044      | insulator  | insulator |
| Cd7P10.ICSD_200596       | insulator  | insulator |
| Cd7Sc1.ICSD_55553        | metal      | metal     |
| Cd7Th6.ICSD_102075       | metal      | metal     |
| Cd9K14Ti12.ICSD_400782   | metal      | metal     |
| Ce1Cl1O1.ICSD_412069     | metal      | insulator |
| Ce1Cl1O1.ICSD_72154      | insulator  | metal     |
| Ce1Cl1Te1.ICSD_426281    | insulator  | insulator |
| Ce1Cl1Te1.ICSD_426282    | metal      | insulator |
| Ce1Cl3.ICSD_31575        | insulator  | insulator |
| Ce1Cl6Cs2.ICSD_14339     | insulator  | insulator |
| Ce1Co1Ge1H1.ICSD_98944   | metal      | metal     |
| Ce1Co1Ge2.ICSD_620738    | metal      | metal     |
| Ce1Co1Ge3.ICSD_620734    | metal      | metal     |
| Ce1Co1In5.ICSD_102108    | metal      | metal     |

Supplementary Table 250. Five-fold cross validated predictions for the metal/insulator classification (242/598).

| system                     | calculated | predicted |
|----------------------------|------------|-----------|
| Ce1Co1Sb2.ICSD_657920      | metal      | metal     |
| Ce1Co1Sb2.ICSD_657991      | metal      | metal     |
| Ce1Co1Sb3.ICSD_419539      | metal      | metal     |
| Ce1Co1Si1.ICSD_620788      | metal      | metal     |
| Ce1Co1Si2.ICSD_16501       | metal      | metal     |
| Ce1Co1Si3.ICSD_620795      | metal      | metal     |
| Ce1Co2Ge2.ICSD_106847      | metal      | metal     |
| Ce1Co2N12O24Rb5.ICSD_24534 | metal      | metal     |
| Ce1Co2P2.ICSD_85893        | metal      | metal     |
| Ce1Co2P2.ICSD_85895        | metal      | metal     |
| Ce1Co2Si2.ICSD_657673      | metal      | metal     |
| Ce1Co2.ICSD_620652         | metal      | metal     |
| Ce1Co2.ICSD_620681         | metal      | metal     |
| Ce1Co5.ICSD_54671          | metal      | metal     |
| Ce1Co5.ICSD_620665         | metal      | metal     |
| Ce1Co5.ICSD_620696         | metal      | metal     |
| Ce1Co5.ICSD_659629         | metal      | metal     |
| Ce1Co8Mn4.ICSD_620758      | metal      | metal     |
| Ce1Co9Ge4.ICSD_166197      | metal      | metal     |
| Ce1Co9Si4.ICSD_169484      | metal      | metal     |
| Ce1Cr1Ge3.ICSD_158977      | metal      | metal     |
| Ce1Cr1O3.ICSD_28931        | insulator  | metal     |
| Ce1Cr1S3.ICSD_88975        | insulator  | insulator |
| Ce1Cs1Cu1S3.ICSD_156245    | insulator  | insulator |
| Ce1Cs1Hg1Se3.ICSD_281442   | insulator  | insulator |
| Ce1Cs1S2.ICSD_73533        | insulator  | insulator |
| Ce1Cu1Ge1.ICSD_106377      | metal      | metal     |
| Ce1Cu1Ge1.ICSD_99673       | metal      | metal     |
| Ce1Cu1Ge2.ICSD_620854      | metal      | metal     |
| Ce1Cu1In1.ICSD_620875      | metal      | metal     |
| Ce1Cu1Mg2.ICSD_102135      | metal      | metal     |
| Ce1Cu1O1S1.ICSD_96344      | insulator  | insulator |
| Ce1Cu1O1Te1.ICSD_416521    | insulator  | insulator |
| Ce1Cu1Pb1.ICSD_620898      | metal      | metal     |
| Ce1Cu1S2.ICSD_415076       | insulator  | insulator |
| Ce1Cu1Sb2.ICSD_658226      | metal      | metal     |
| Ce1Cu1Se2.ICSD_99676       | insulator  | insulator |
| Ce1Cu1Si1.ICSD_30760       | metal      | metal     |
| Ce1Cu1Si2.ICSD_620916      | metal      | metal     |
| Ce1Cu1Sn1.ICSD_416788      | metal      | metal     |
| Ce1Cu1Sn1.ICSD_600999      | metal      | metal     |
| Ce1Cu1.ICSD_102122         | metal      | metal     |
| Ce1Cu2Ge2.ICSD_246608      | metal      | metal     |
| Ce1Cu2In1.ICSD_106379      | metal      | metal     |
| Ce1Cu2Li1P2.ICSD_620884    | metal      | metal     |
| Ce1Cu2Mg1.ICSD_157110      | metal      | metal     |
| Ce1Cu2N12O24Tl5.ICSD_24547 | metal      | metal     |
| Ce1Cu2Sb2.ICSD_658101      | metal      | metal     |
| Ce1Cu2Si2.ICSD_620930      | metal      | metal     |
| Ce1Cu2Sn2.ICSD_620958      | metal      | metal     |

Supplementary Table 251. Five-fold cross validated predictions for the metal/insulator classification (243/598).

| system                     | calculated | predicted |
|----------------------------|------------|-----------|
| Ce1Cu2Zn3.ICSD_99222       | metal      | metal     |
| Ce1Cu2.ICSD_102124         | metal      | metal     |
| Ce1Cu2.ICSD_620830         | metal      | metal     |
| Ce1Cu3Mn4O12.ICSD_169042   | metal      | metal     |
| Ce1Cu4Sn1.ICSD_110771      | metal      | metal     |
| Ce1Cu5Sn1.ICSD_101011      | metal      | metal     |
| Ce1Cu5.ICSD_620841         | metal      | metal     |
| Ce1Cu6.ICSD_102127         | metal      | metal     |
| Ce1Cu6.ICSD_174100         | metal      | metal     |
| Ce1Cu6.ICSD_620842         | metal      | metal     |
| Ce1Cu9Mg2.ICSD_245210      | metal      | metal     |
| Ce1Dy1S3.ICSD_200015       | insulator  | insulator |
| Ce1Er3S6.ICSD_620979       | insulator  | insulator |
| Ce1F1S1.ICSD_31939         | metal      | insulator |
| Ce1F3.ICSD_4               | insulator  | insulator |
| Ce1F3.ICSD_42470           | insulator  | insulator |
| Ce1F3.ICSD_64720           | insulator  | insulator |
| Ce1F4K1.ICSD_23229         | insulator  | insulator |
| Ce1F7Zr1.ICSD_39776        | insulator  | insulator |
| Ce1Fe1Sb2.ICSD_657915      | metal      | metal     |
| Ce1Fe1Si1.ICSD_656908      | metal      | metal     |
| Ce1Fe1Si2.ICSD_621071      | metal      | metal     |
| Ce1Fe2Ge2.ICSD_106824      | metal      | metal     |
| Ce1Fe2K5N12O24.ICSD_24531  | metal      | metal     |
| Ce1Fe2N12O24Tl5.ICSD_24532 | metal      | metal     |
| Ce1Fe2Si2.ICSD_621068      | metal      | metal     |
| Ce1Fe2Si2.ICSD_657671      | metal      | metal     |
| Ce1Fe2.ICSD_620992         | metal      | metal     |
| Ce1Fe2.ICSD_620994         | metal      | metal     |
| Ce1Fe4P12.ICSD_621050      | insulator  | metal     |
| Ce1Fe4Sb12.ICSD_621065     | metal      | metal     |
| Ce1Fe5.ICSD_102147         | metal      | metal     |
| Ce1Ga1Ni1.ICSD_102171      | metal      | metal     |
| Ce1Ga1O3.ICSD_76048        | metal      | metal     |
| Ce1Ga1Zn1.ICSD_621158      | metal      | metal     |
| Ce1Ga1.ICSD_621093         | metal      | metal     |
| Ce1Ga1.ICSD_621099         | metal      | metal     |
| Ce1Ga2Ni1.ICSD_188330      | metal      | metal     |
| Ce1Ga2.ICSD_102165         | metal      | metal     |
| Ce1Ga2.ICSD_102166         | metal      | metal     |
| Ce1Ga2.ICSD_621110         | metal      | metal     |
| Ce1Ga2.ICSD_621122         | metal      | metal     |
| Ce1Ga3Pd2.ICSD_602952      | metal      | metal     |
| Ce1Ga6Pd1.ICSD_240161      | metal      | metal     |
| Ce1Ga6.ICSD_102167         | metal      | metal     |
| Ce1Ge12Pt4.ICSD_174553     | metal      | metal     |
| Ce1Ge1Ir1.ICSD_621210      | metal      | metal     |
| Ce1Ge1Li2.ICSD_52859       | metal      | metal     |
| Ce1Ge1Mn1.ICSD_80010       | metal      | metal     |
| Ce1Ge1Mn1.ICSD_85858       | metal      | metal     |

Supplementary Table 252. Five-fold cross validated predictions for the metal/insulator classification (244/598).

| system                  | calculated | predicted |
|-------------------------|------------|-----------|
| Ce1Ge1Ni1_ICSD_99671    | metal      | metal     |
| Ce1Ge1Pd2_ICSD_621240   | metal      | metal     |
| Ce1Ge1Pt1_ICSD_410358   | metal      | metal     |
| Ce1Ge1Rh1_ICSD_414508   | metal      | metal     |
| Ce1Ge1Sc1_ICSD_52866    | metal      | metal     |
| Ce1Ge1Ti1_ICSD_107618   | metal      | metal     |
| Ce1Ge1Zn1_ICSD_163343   | metal      | metal     |
| Ce1Ge1Zn1_ICSD_420186   | metal      | metal     |
| Ce1Ge1_ICSD_621180      | metal      | metal     |
| Ce1Ge1_ICSD_621196      | metal      | metal     |
| Ce1Ge2Ir2_ICSD_621212   | metal      | metal     |
| Ce1Ge2Li1_ICSD_52860    | metal      | metal     |
| Ce1Ge2Mn2_ICSD_621222   | metal      | metal     |
| Ce1Ge2Ni1_ICSD_603231   | metal      | metal     |
| Ce1Ge2Ni2_ICSD_106849   | metal      | metal     |
| Ce1Ge2Pd2_ICSD_621242   | metal      | metal     |
| Ce1Ge2Pt2_ICSD_52863    | metal      | metal     |
| Ce1Ge2Pt2_ICSD_61371    | metal      | metal     |
| Ce1Ge2Pt2_ICSD_621247   | metal      | metal     |
| Ce1Ge2Rh2_ICSD_621251   | metal      | metal     |
| Ce1Ge2Ru2_ICSD_621263   | metal      | metal     |
| Ce1Ge2_ICSD_621193      | metal      | metal     |
| Ce1Ge3Ir1_ICSD_161868   | metal      | metal     |
| Ce1Ge3Rh1_ICSD_161867   | metal      | metal     |
| Ce1Ge3Rh1_ICSD_621252   | metal      | metal     |
| Ce1Ge3Ru1_ICSD_246698   | metal      | metal     |
| Ce1Ge3V1_ICSD_164892    | metal      | metal     |
| Ce1Ge4Ni9_ICSD_184400   | metal      | metal     |
| Ce1Ge4Rh6_ICSD_425231   | metal      | metal     |
| Ce1Ge5_ICSD_246812      | metal      | metal     |
| Ce1H1Ru1Si1_ICSD_161825 | metal      | metal     |
| Ce1H1Se1_ICSD_78956     | metal      | insulator |
| Ce1H2Ni1Sn1_ICSD_157930 | metal      | metal     |
| Ce1H2_ICSD_44875        | metal      | metal     |
| Ce1H3_ICSD_621290       | metal      | metal     |
| Ce1H8O12S2_ICSD_417358  | insulator  | insulator |
| Ce1H8O7P3_ICSD_88339    | insulator  | insulator |
| Ce1Hg1Pd1_ICSD_657951   | metal      | metal     |
| Ce1Hg1_ICSD_621334      | metal      | metal     |
| Ce1Hg2_ICSD_102181      | metal      | metal     |
| Ce1Hg3_ICSD_621337      | metal      | metal     |
| Ce1I1S1_ICSD_23490      | insulator  | insulator |
| Ce1I4O12_ICSD_20033     | insulator  | insulator |
| Ce1In1Ir1_ICSD_100002   | metal      | metal     |
| Ce1In1Ni1_ICSD_167627   | metal      | metal     |
| Ce1In1Ni1_ICSD_621377   | metal      | metal     |
| Ce1In1Pd1_ICSD_157625   | metal      | metal     |
| Ce1In1Pd1_ICSD_160860   | metal      | metal     |
| Ce1In1Pd1_ICSD_59883    | metal      | metal     |
| Ce1In1Pd1_ICSD_602649   | metal      | metal     |

Supplementary Table 253. Five-fold cross validated predictions for the metal/insulator classification (245/598).

| system                 | calculated | predicted |
|------------------------|------------|-----------|
| Ce1In1Pd2_ICSD_106406  | metal      | metal     |
| Ce1In1Pt1_ICSD_418186  | metal      | metal     |
| Ce1In1Pt1_ICSD_621382  | metal      | metal     |
| Ce1In1Pt4_ICSD_621380  | metal      | metal     |
| Ce1In1Rh1_ICSD_602648  | metal      | metal     |
| Ce1In1Rh1_ICSD_621385  | metal      | metal     |
| Ce1In1Zn1_ICSD_621394  | metal      | metal     |
| Ce1In2Ir1_ICSD_414474  | metal      | metal     |
| Ce1In2Ni9_ICSD_600164  | metal      | metal     |
| Ce1In2Pd1_ICSD_150132  | metal      | metal     |
| Ce1In2Pt2_ICSD_54553   | metal      | metal     |
| Ce1In3_ICSD_171678     | metal      | metal     |
| Ce1In4Pd2_ICSD_54733   | metal      | metal     |
| Ce1In5Ir1_ICSD_150225  | metal      | metal     |
| Ce1In5Rh1_ICSD_110778  | metal      | metal     |
| Ce1Ir1P1_ICSD_414515   | metal      | metal     |
| Ce1Ir1Sb1_ICSD_420488  | metal      | metal     |
| Ce1Ir1Si1_ICSD_413854  | metal      | metal     |
| Ce1Ir1Si2_ICSD_602571  | metal      | metal     |
| Ce1Ir1Sn1_ICSD_415903  | metal      | metal     |
| Ce1Ir2P2_ICSD_186990   | metal      | metal     |
| Ce1Ir2Si2_ICSD_411678  | metal      | metal     |
| Ce1Ir2Si2_ICSD_621424  | metal      | metal     |
| Ce1Ir2Si2_ICSD_621426  | metal      | metal     |
| Ce1Ir2Sn2_ICSD_621436  | metal      | metal     |
| Ce1Ir2Zn20_ICSD_290421 | metal      | metal     |
| Ce1Ir2_ICSD_621398     | metal      | metal     |
| Ce1Ir3Si2_ICSD_52877   | metal      | metal     |
| Ce1Ir3Si2_ICSD_79221   | metal      | metal     |
| Ce1Ir3_ICSD_621405     | metal      | metal     |
| Ce1Ir3_ICSD_99244      | metal      | metal     |
| Ce1Ir5_ICSD_102195     | metal      | metal     |
| Ce1Ir5_ICSD_621409     | metal      | metal     |
| Ce1K1S2_ICSD_621439    | insulator  | insulator |
| Ce1K1S4Si1_ICSD_87946  | insulator  | insulator |
| Ce1K1S4Si1_ICSD_95774  | insulator  | insulator |
| Ce1K2O8P2_ICSD_173150  | insulator  | insulator |
| Ce1K3O8P2_ICSD_65193   | insulator  | insulator |
| Ce1Li1O2_ICSD_47116    | insulator  | insulator |
| Ce1Li1Si2_ICSD_621473  | metal      | metal     |
| Ce1Li1Sn1_ICSD_106409  | metal      | metal     |
| Ce1Li1Sn2_ICSD_102212  | metal      | metal     |
| Ce1Li2N2_ICSD_34003    | insulator  | insulator |
| Ce1Li2P2_ICSD_42016    | insulator  | insulator |
| Ce1Li2Sb2_ICSD_36018   | metal      | metal     |
| Ce1Li8O6_ICSD_61219    | insulator  | insulator |
| Ce1Mg12_ICSD_621495    | metal      | metal     |
| Ce1Mg1Ni4_ICSD_107421  | metal      | metal     |
| Ce1Mg1Pd1_ICSD_412401  | metal      | metal     |
| Ce1Mg1Pt1_ICSD_412400  | metal      | metal     |

Supplementary Table 254. Five-fold cross validated predictions for the metal/insulator classification (246/598).

| system                     | calculated | predicted |
|----------------------------|------------|-----------|
| Ce1Mg1Sn1_ICSD_182477      | metal      | metal     |
| Ce1Mg1Ti1_ICSD_414440      | metal      | metal     |
| Ce1Mg1Zn2_ICSD_249342      | metal      | metal     |
| Ce1Mg1_ICSD_102215         | metal      | metal     |
| Ce1Mg2Ni9_ICSD_55615       | metal      | metal     |
| Ce1Mg2Si2_ICSD_16180       | metal      | metal     |
| Ce1Mg2_ICSD_621499         | metal      | metal     |
| Ce1Mg3_ICSD_621489         | metal      | metal     |
| Ce1Mn1Ni4_ICSD_262487      | metal      | metal     |
| Ce1Mn1O1Sb1_ICSD_419356    | metal      | metal     |
| Ce1Mn1Si1_ICSD_621538      | metal      | metal     |
| Ce1Mn1Si1_ICSD_75051       | metal      | metal     |
| Ce1Mn1Si1_ICSD_85850       | metal      | metal     |
| Ce1Mn1Si2_ICSD_106410      | metal      | metal     |
| Ce1Mn1Si2_ICSD_106411      | metal      | metal     |
| Ce1Mn2Si2_ICSD_621535      | metal      | metal     |
| Ce1Mo6S8_ICSD_603456       | metal      | metal     |
| Ce1Mo6Se8_ICSD_621544      | insulator  | metal     |
| Ce1N12Ni2O24Ti5_ICSD_24542 | metal      | metal     |
| Ce1N1O2Si1_ICSD_9751       | insulator  | insulator |
| Ce1N1_ICSD_621559          | metal      | metal     |
| Ce1N2Sr1_ICSD_95805        | insulator  | insulator |
| Ce1Na1Se2_ICSD_621570      | insulator  | insulator |
| Ce1Nb1O4_ICSD_414675       | insulator  | insulator |
| Ce1Ni1P1_ICSD_621627       | metal      | metal     |
| Ce1Ni1Sb2_ICSD_84529       | metal      | metal     |
| Ce1Ni1Si1_ICSD_152749      | metal      | metal     |
| Ce1Ni1Si2_ICSD_42711       | metal      | metal     |
| Ce1Ni1Sn1_ICSD_102236      | metal      | metal     |
| Ce1Ni1Sn2_ICSD_621687      | metal      | metal     |
| Ce1Ni1Zn1_ICSD_656582      | metal      | metal     |
| Ce1Ni1_ICSD_621583         | metal      | metal     |
| Ce1Ni1_ICSD_621584         | metal      | metal     |
| Ce1Ni2P2_ICSD_621626       | metal      | metal     |
| Ce1Ni2Sb2_ICSD_602480      | metal      | metal     |
| Ce1Ni2Si2_ICSD_621678      | metal      | metal     |
| Ce1Ni2Sn2_ICSD_602690      | metal      | metal     |
| Ce1Ni2Sn2_ICSD_621697      | metal      | metal     |
| Ce1Ni2_ICSD_621609         | metal      | metal     |
| Ce1Ni4Sn2_ICSD_102238      | metal      | metal     |
| Ce1Ni5Sn1_ICSD_621684      | metal      | metal     |
| Ce1Ni5_ICSD_102232         | metal      | metal     |
| Ce1Ni5_ICSD_621615         | metal      | metal     |
| Ce1Ni9Si4_ICSD_98408       | metal      | metal     |
| Ce1O16Zr7_ICSD_164737      | insulator  | insulator |
| Ce1O1P1Ru1_ICSD_80201      | metal      | metal     |
| Ce1O1P1Zn1_ICSD_416475     | insulator  | insulator |
| Ce1O1Sb1Zn1_ICSD_85449     | insulator  | metal     |
| Ce1O1_ICSD_52886           | metal      | metal     |
| Ce1O2_ICSD_169031          | insulator  | insulator |

Supplementary Table 255. Five-fold cross validated predictions for the metal/insulator classification (247/598).

| system                 | calculated | predicted |
|------------------------|------------|-----------|
| Ce1O2_ICSD_189287      | insulator  | insulator |
| Ce1O2_ICSD_28753       | insulator  | metal     |
| Ce1O3Sr1_ICSD_154927   | insulator  | insulator |
| Ce1O3V1_ICSD_162747    | insulator  | metal     |
| Ce1O3V1_ICSD_28926     | metal      | metal     |
| Ce1O4P1_ICSD_182582    | insulator  | insulator |
| Ce1O4P1_ICSD_182583    | metal      | insulator |
| Ce1O4P1_ICSD_182586    | insulator  | insulator |
| Ce1O4P1_ICSD_184550    | insulator  | insulator |
| Ce1O4P1_ICSD_22265     | insulator  | insulator |
| Ce1O4P1_ICSD_27859     | insulator  | insulator |
| Ce1O4P1_ICSD_31563     | insulator  | insulator |
| Ce1O4P1_ICSD_39135     | insulator  | insulator |
| Ce1O4Si1_ICSD_92040    | insulator  | insulator |
| Ce1O4Sr2_ICSD_86768    | insulator  | insulator |
| Ce1O4Ta1_ICSD_415427   | insulator  | insulator |
| Ce1O4V1_ICSD_183203    | insulator  | insulator |
| Ce1O4V1_ICSD_183206    | metal      | insulator |
| Ce1O4V1_ICSD_78075     | insulator  | insulator |
| Ce1O4Zr1_ICSD_164740   | insulator  | insulator |
| Ce1O6Se2_ICSD_60778    | insulator  | insulator |
| Ce1O7P2_ICSD_160452    | insulator  | insulator |
| Ce1O8Zr3_ICSD_164738   | insulator  | insulator |
| Ce1O9P3_ICSD_417805    | insulator  | insulator |
| Ce1O9Ta3_ICSD_66281    | insulator  | insulator |
| Ce1Os1Si1_ICSD_41256   | metal      | metal     |
| Ce1Os1Si3_ICSD_621741  | metal      | metal     |
| Ce1Os2Si2_ICSD_621738  | metal      | metal     |
| Ce1Os2_ICSD_102241     | metal      | metal     |
| Ce1Os2_ICSD_621725     | metal      | metal     |
| Ce1Os4P12_ICSD_621731  | insulator  | metal     |
| Ce1Os4Sb12_ICSD_621737 | metal      | metal     |
| Ce1P12Ru4_ICSD_621765  | insulator  | metal     |
| Ce1P1Pd1_ICSD_69672    | metal      | metal     |
| Ce1P1S1_ICSD_621769    | insulator  | insulator |
| Ce1P1_ICSD_52888       | metal      | metal     |
| Ce1P1_ICSD_603003      | metal      | metal     |
| Ce1P2Pt4_ICSD_409972   | metal      | metal     |
| Ce1P2Rh2_ICSD_40764    | metal      | metal     |
| Ce1P2Ru2_ICSD_602130   | metal      | metal     |
| Ce1P2_ICSD_108172      | metal      | insulator |
| Ce1P2_ICSD_621753      | insulator  | metal     |
| Ce1P5_ICSD_409181      | metal      | metal     |
| Ce1P5_ICSD_621759      | insulator  | metal     |
| Ce1P5_ICSD_99178       | metal      | metal     |
| Ce1Pb1Rh1_ICSD_161337  | metal      | metal     |
| Ce1Pb3_ICSD_621779     | metal      | metal     |
| Ce1Pd1Sb1_ICSD_621834  | metal      | metal     |
| Ce1Pd1Sb2_ICSD_658218  | metal      | metal     |
| Ce1Pd1Sb3_ICSD_602477  | metal      | metal     |

Supplementary Table 256. Five-fold cross validated predictions for the metal/insulator classification (248/598).

| system                | calculated | predicted |
|-----------------------|------------|-----------|
| Ce1Pd1Sn1_ICSD_102254 | metal      | metal     |
| Ce1Pd1Sn1_ICSD_416969 | metal      | metal     |
| Ce1Pd1Sn1_ICSD_416970 | metal      | metal     |
| Ce1Pd1Ti1_ICSD_102255 | metal      | metal     |
| Ce1Pd1Zn1_ICSD_420207 | metal      | metal     |
| Ce1Pd1Zn1_ICSD_420208 | metal      | metal     |
| Ce1Pd1_ICSD_621787    | metal      | metal     |
| Ce1Pd1_ICSD_621821    | metal      | metal     |
| Ce1Pd2Sb2_ICSD_604352 | metal      | metal     |
| Ce1Pd2Si2_ICSD_621847 | metal      | metal     |
| Ce1Pd2Si2_ICSD_621852 | metal      | metal     |
| Ce1Pd2Sn2_ICSD_621854 | metal      | metal     |
| Ce1Pd2Zn3_ICSD_419163 | metal      | metal     |
| Ce1Pd3S4_ICSD_621832  | metal      | metal     |
| Ce1Pd3_ICSD_621789    | metal      | metal     |
| Ce1Pd5_ICSD_102247    | metal      | metal     |
| Ce1Pt1Si1_ICSD_621906 | metal      | metal     |
| Ce1Pt1Si2_ICSD_106420 | metal      | metal     |
| Ce1Pt1Sn1_ICSD_106421 | metal      | metal     |
| Ce1Pt1Sn1_ICSD_415492 | metal      | metal     |
| Ce1Pt1Zn1_ICSD_418546 | metal      | metal     |
| Ce1Pt1_ICSD_621865    | metal      | metal     |
| Ce1Pt2Si2_ICSD_621898 | metal      | metal     |
| Ce1Pt2Si2_ICSD_621903 | metal      | metal     |
| Ce1Pt2Sn2_ICSD_621912 | metal      | metal     |
| Ce1Pt2_ICSD_621878    | metal      | metal     |
| Ce1Pt3_ICSD_102258    | metal      | metal     |
| Ce1Pt5Sb1_ICSD_183604 | metal      | metal     |
| Ce1Pt5_ICSD_602756    | metal      | metal     |
| Ce1Pt5_ICSD_621867    | metal      | metal     |
| Ce1Rb1S2_ICSD_81395   | insulator  | insulator |
| Ce1Rb1Se2_ICSD_281068 | insulator  | insulator |
| Ce1Rb1Te2_ICSD_413329 | metal      | insulator |
| Ce1Re4Si2_ICSD_27747  | metal      | metal     |
| Ce1Rh1Sb1_ICSD_90870  | metal      | metal     |
| Ce1Rh1Si2_ICSD_602570 | metal      | metal     |
| Ce1Rh1Si3_ICSD_621955 | metal      | metal     |
| Ce1Rh1Sn1_ICSD_657265 | metal      | metal     |
| Ce1Rh1_ICSD_604327    | metal      | metal     |
| Ce1Rh2Si1_ICSD_99133  | metal      | metal     |
| Ce1Rh2Si2_ICSD_621951 | metal      | metal     |
| Ce1Rh2Sn2_ICSD_621965 | metal      | metal     |
| Ce1Rh2_ICSD_102268    | metal      | metal     |
| Ce1Rh3_ICSD_102270    | metal      | metal     |
| Ce1Rh6Si4_ICSD_247289 | metal      | metal     |
| Ce1Ru1Si1_ICSD_41252  | metal      | metal     |
| Ce1Ru1Si2_ICSD_656786 | metal      | metal     |
| Ce1Ru1Si3_ICSD_161866 | metal      | metal     |
| Ce1Ru1Si3_ICSD_621998 | metal      | metal     |
| Ce1Ru1Sn3_ICSD_600556 | metal      | metal     |

Supplementary Table 257. Five-fold cross validated predictions for the metal/insulator classification (249/598).

| system                 | calculated | predicted |
|------------------------|------------|-----------|
| Ce1Ru1Sn3_ICSD_622003  | metal      | metal     |
| Ce1Ru2Si2_ICSD_657435  | metal      | metal     |
| Ce1Ru2_ICSD_102276     | metal      | metal     |
| Ce1Ru3Si2_ICSD_52898   | metal      | metal     |
| Ce1Ru4Sb12_ICSD_621988 | metal      | metal     |
| Ce1Ru4Sn6_ICSD_406894  | metal      | metal     |
| Ce1S1_ICSD_183954      | metal      | metal     |
| Ce1S1_ICSD_622029      | metal      | metal     |
| Ce1S2_ICSD_418404      | insulator  | insulator |
| Ce1S2_ICSD_653996      | insulator  | insulator |
| Ce1S2_ICSD_656240      | metal      | metal     |
| Ce1S3Sc1_ICSD_400014   | insulator  | insulator |
| Ce1S3Yb1_ICSD_622073   | insulator  | metal     |
| Ce1S6Yb3_ICSD_42129    | metal      | metal     |
| Ce1Sb1Te1_ICSD_601692  | metal      | metal     |
| Ce1Sb1Te1_ICSD_93136   | metal      | metal     |
| Ce1Sb1_ICSD_52903      | metal      | metal     |
| Ce1Sb1_ICSD_622102     | metal      | metal     |
| Ce1Sb2_ICSD_622083     | metal      | metal     |
| Ce1Sc1Si1_ICSD_87159   | metal      | metal     |
| Ce1Se1_ICSD_183955     | metal      | metal     |
| Ce1Se1_ICSD_622126     | metal      | metal     |
| Ce1Se2Ti1_ICSD_622131  | insulator  | insulator |
| Ce1Se2Ti1_ICSD_622133  | insulator  | insulator |
| Ce1Se2_ICSD_108265     | metal      | metal     |
| Ce1Se2_ICSD_52908      | metal      | metal     |
| Ce1Se2_ICSD_622120     | metal      | metal     |
| Ce1Se2_ICSD_622124     | metal      | metal     |
| Ce1Se3Yb1_ICSD_99666   | insulator  | metal     |
| Ce1Si1_ICSD_622140     | metal      | metal     |
| Ce1Si2_ICSD_622153     | metal      | metal     |
| Ce1Si5_ICSD_174529     | metal      | metal     |
| Ce1Sn1Zn1_ICSD_152624  | metal      | metal     |
| Ce1Sn3_ICSD_622248     | metal      | metal     |
| Ce1Te1_ICSD_183956     | metal      | metal     |
| Ce1Te1_ICSD_622277     | metal      | metal     |
| Ce1Te2Ti1_ICSD_622280  | insulator  | insulator |
| Ce1Te2_ICSD_622263     | metal      | metal     |
| Ce1Ti1Zn1_ICSD_622301  | metal      | metal     |
| Ce1Ti3_ICSD_102295     | metal      | metal     |
| Ce1Zn11_ICSD_602894    | metal      | metal     |
| Ce1Zn1_ICSD_108270     | metal      | metal     |
| Ce1Zn2_ICSD_102305     | metal      | metal     |
| Ce1Zn2_ICSD_622320     | metal      | metal     |
| Ce1Zn3_ICSD_150633     | metal      | metal     |
| Ce1Zn3_ICSD_622345     | metal      | metal     |
| Ce1Zn5_ICSD_622328     | metal      | metal     |
| Ce1Zn5_ICSD_622339     | metal      | metal     |
| Ce1_ICSD_41824         | metal      | metal     |
| Ce1_ICSD_43381         | metal      | metal     |

Supplementary Table 258. Five-fold cross validated predictions for the metal/insulator classification (250/598).

| system                   | calculated | predicted |
|--------------------------|------------|-----------|
| Ce1_ICSD_43569           | metal      | metal     |
| Ce1_ICSD_52844           | metal      | metal     |
| Ce1_ICSD_601481          | metal      | metal     |
| Ce1_ICSD_620630          | metal      | metal     |
| Ce2Cl3N1_ICSD_261615     | insulator  | insulator |
| Ce2Cl6H28O14_ICSD_280974 | metal      | insulator |
| Ce2Co1Ga9Ge2_ICSD_173618 | metal      | metal     |
| Ce2Co1Si3_ICSD_83895     | metal      | metal     |
| Ce2Co5Fe12N3_ICSD_603443 | metal      | metal     |
| Ce2Co5Fe12_ICSD_603342   | metal      | metal     |
| Ce2Cr1N3_ICSD_78826      | metal      | metal     |
| Ce2Cu2Mg1_ICSD_107322    | metal      | metal     |
| Ce2F4Se1_ICSD_21011      | insulator  | insulator |
| Ce2Fe17N3_ICSD_67562     | metal      | metal     |
| Ce2Fe17_ICSD_106387      | metal      | metal     |
| Ce2Fe17_ICSD_620990      | metal      | metal     |
| Ce2Fe2O3S2_ICSD_181167   | insulator  | metal     |
| Ce2Ga12Pd1_ICSD_171487   | metal      | metal     |
| Ce2Ge2In1_ICSD_415108    | metal      | metal     |
| Ce2Ge2Mg1_ICSD_413849    | metal      | metal     |
| Ce2Ge3Li2_ICSD_63036     | metal      | metal     |
| Ce2Ge3O9_ICSD_83342      | insulator  | insulator |
| Ce2Ge3Zn6_ICSD_98233     | metal      | metal     |
| Ce2H1Li1O3_ICSD_56745    | insulator  | insulator |
| Ce2H5_ICSD_621314        | metal      | metal     |
| Ce2I2Si2_ICSD_407246     | metal      | metal     |
| Ce2In1Ni2_ICSD_150615    | metal      | metal     |
| Ce2In1Pd2_ICSD_107337    | metal      | metal     |
| Ce2In1Pt2_ICSD_410293    | metal      | metal     |
| Ce2In1_ICSD_102186       | metal      | metal     |
| Ce2Mg17Ru4_ICSD_424261   | metal      | metal     |
| Ce2Mg1Ni2_ICSD_411012    | metal      | metal     |
| Ce2Mg1Si2_ICSD_83915     | metal      | metal     |
| Ce2Mn1N3_ICSD_50579      | metal      | metal     |
| Ce2Mn2O3Se2_ICSD_181935  | insulator  | metal     |
| Ce2N2Se1_ICSD_421995     | insulator  | insulator |
| Ce2Ni12P7_ICSD_621628    | metal      | metal     |
| Ce2Ni2Sn1_ICSD_55495     | metal      | metal     |
| Ce2Ni2Zn1_ICSD_416816    | metal      | metal     |
| Ce2Ni7P4_ICSD_658790     | metal      | metal     |
| Ce2Ni7_ICSD_621585       | metal      | metal     |
| Ce2O12W3_ICSD_401920     | metal      | insulator |
| Ce2O2S1_ICSD_154584      | insulator  | insulator |
| Ce2O2Sb1_ICSD_9100       | metal      | metal     |
| Ce2O2Te1_ICSD_9101       | insulator  | insulator |
| Ce2O3_ICSD_154587        | insulator  | insulator |
| Ce2O3_ICSD_160221        | insulator  | insulator |
| Ce2O3_ICSD_26865         | insulator  | insulator |
| Ce2O3_ICSD_96202         | insulator  | insulator |
| Ce2O4Se1Si1_ICSD_59941   | insulator  | insulator |

Supplementary Table 259. Five-fold cross validated predictions for the metal/insulator classification (251/598).

| system                   | calculated | predicted |
|--------------------------|------------|-----------|
| Ce2O4Si1Te1_ICSD_59940   | metal      | insulator |
| Ce2O7Zr2_ICSD_168595     | insulator  | insulator |
| Ce2O9Si1Ti2_ICSD_410201  | insulator  | insulator |
| Ce2Pd21Si6_ICSD_174079   | metal      | metal     |
| Ce2Pd9Sb3_ICSD_81853     | metal      | metal     |
| Ce2Pt7Si4_ICSD_246168    | metal      | metal     |
| Ce2Rh15Si7_ICSD_280622   | metal      | metal     |
| Ce2Rh1Si3_ICSD_106425    | metal      | metal     |
| Ce2Rh1Si3_ICSD_164827    | metal      | metal     |
| Ce2Rh3Si5_ICSD_247297    | metal      | metal     |
| Ce2Ru1Zn4_ICSD_418547    | metal      | metal     |
| Ce2S3_ICSD_89499         | insulator  | insulator |
| Ce2S5Si1_ICSD_97318      | insulator  | insulator |
| Ce2S5Sn1_ICSD_622053     | metal      | metal     |
| Ce2Sb1_ICSD_409587       | metal      | metal     |
| Ce2Sb1_ICSD_52904        | metal      | metal     |
| Ce2Si7_ICSD_174528       | metal      | metal     |
| Ce2Zn17_ICSD_622318      | metal      | metal     |
| Ce3Cl1S8Si2_ICSD_412222  | insulator  | insulator |
| Ce3Cl3O6Ta1_ICSD_202554  | insulator  | insulator |
| Ce3Co4Sn13_ICSD_102118   | metal      | metal     |
| Ce3Co8Si1_ICSD_620784    | metal      | metal     |
| Ce3Cu1Ge1S7_ICSD_620858  | insulator  | insulator |
| Ce3Cu1Ge1Se7_ICSD_620859 | insulator  | insulator |
| Ce3Cu1S7Si1_ICSD_418242  | insulator  | insulator |
| Ce3Cu1S7Sn1_ICSD_155937  | insulator  | insulator |
| Ce3Cu1Se7Si1_ICSD_156282 | insulator  | insulator |
| Ce3Cu1Se7Sn1_ICSD_152824 | insulator  | insulator |
| Ce3Cu3Sb4_ICSD_658638    | metal      | metal     |
| Ce3Ga1_ICSD_102168       | metal      | metal     |
| Ce3Ga1_ICSD_102169       | metal      | metal     |
| Ce3Ga1_ICSD_621097       | metal      | metal     |
| Ce3Ge13Ir4_ICSD_621211   | metal      | metal     |
| Ce3Ge13Os4_ICSD_621237   | metal      | metal     |
| Ce3Ge6Pd20_ICSD_106395   | metal      | metal     |
| Ce3I1S8Si2_ICSD_86173    | insulator  | insulator |
| Ce3In1_ICSD_98500        | metal      | metal     |
| Ce3Ir4Sn13_ICSD_621433   | metal      | metal     |
| Ce3N11Si6_ICSD_401679    | metal      | insulator |
| Ce3N1S3_ICSD_416218      | insulator  | insulator |
| Ce3Ni6Si2_ICSD_621650    | metal      | metal     |
| Ce3O16Zr5_ICSD_164739    | insulator  | insulator |
| Ce3O8Zr1_ICSD_164742     | insulator  | insulator |
| Ce3Pb1_ICSD_108259       | metal      | metal     |
| Ce3Pd20Si6_ICSD_75013    | metal      | metal     |
| Ce3Pd5Si1_ICSD_93244     | metal      | metal     |
| Ce3Pt3Sb4_ICSD_621896    | insulator  | metal     |
| Ce3Pt4_ICSD_621874       | metal      | metal     |
| Ce3Rh2Si2_ICSD_247291    | metal      | metal     |
| Ce3Rh4Sn13_ICSD_621967   | metal      | metal     |

Supplementary Table 260. Five-fold cross validated predictions for the metal/insulator classification (252/598).

| system                    | calculated | predicted |
|---------------------------|------------|-----------|
| Ce3Ru4Sn13.ICSD.423135    | metal      | metal     |
| Ce3S4.ICSD.31602          | metal      | metal     |
| Ce3S4.ICSD.622018         | metal      | metal     |
| Ce3Se4.ICSD.622113        | metal      | metal     |
| Ce3Si2.ICSD.622176        | metal      | metal     |
| Ce3Si2.ICSD.622187        | metal      | metal     |
| Ce3Sn1.ICSD.622224        | metal      | metal     |
| Ce3Sn1.ICSD.622230        | metal      | metal     |
| Ce3Te4.ICSD.622276        | metal      | metal     |
| Ce3Ti1.ICSD.102296        | metal      | metal     |
| Ce4Cl3N1S3.ICSD.420115    | insulator  | insulator |
| Ce4Cr1S7.ICSD.603696      | insulator  | insulator |
| Ce4Cu1S7.ICSD.620904      | insulator  | insulator |
| Ce4Ge3S12.ICSD.418634     | metal      | insulator |
| Ce4O4S3.ICSD.2578         | insulator  | insulator |
| Ce4O4Se3.ICSD.419127      | insulator  | insulator |
| Ce4Pd12Sn25.ICSD.189075   | metal      | metal     |
| Ce4Pt12Sn25.ICSD.150777   | metal      | metal     |
| Ce4Rh12Si1.ICSD.247295    | metal      | metal     |
| Ce4Rh4Si3.ICSD.247292     | metal      | metal     |
| Ce4Ru3.ICSD.151120        | metal      | metal     |
| Ce4Sb3.ICSD.622086        | metal      | metal     |
| Ce5O16Zr3.ICSD.164741     | insulator  | insulator |
| Ce5Si3.ICSD.108267        | metal      | metal     |
| Ce5Si4.ICSD.165733        | metal      | metal     |
| Ce5Sn3.ICSD.622219        | metal      | metal     |
| Ce6Ni6P17.ICSD.2243       | metal      | metal     |
| Ce6P17Pd6.ICSD.30851      | metal      | metal     |
| Ce7O12.ICSD.88754         | insulator  | insulator |
| Ce7O16Zr1.ICSD.164743     | insulator  | insulator |
| Ce8Pd24Sb1.ICSD.83378     | metal      | metal     |
| Cl10Co1Tb6.ICSD.424437    | insulator  | insulator |
| Cl10Cs3O1Re2.ICSD.31      | insulator  | insulator |
| Cl10Fe1W2.ICSD.422521     | insulator  | insulator |
| Cl10Gd6O12Si4.ICSD.416000 | insulator  | insulator |
| Cl10K4O1Re2.ICSD.108904   | insulator  | insulator |
| Cl10K4O1Ru2.ICSD.8054     | insulator  | insulator |
| Cl10K4O1W2.ICSD.1923      | insulator  | insulator |
| Cl10Mo2N4S4.ICSD.47102    | insulator  | insulator |
| Cl10Mo2S4Se2.ICSD.84359   | insulator  | insulator |
| Cl10Nb1P1.ICSD.26096      | insulator  | insulator |
| Cl10Nb2O1Te4.ICSD.49920   | insulator  | insulator |
| Cl10Nb2P8S20.ICSD.416095  | insulator  | insulator |
| Cl10Nb2.ICSD.16757        | insulator  | insulator |
| Cl10O12Si4Y6.ICSD.94464   | insulator  | insulator |
| Cl10O7Si6.ICSD.409628     | insulator  | insulator |
| Cl10P1Ta1.ICSD.26097      | insulator  | insulator |
| Cl10P1U1.ICSD.35464       | insulator  | insulator |
| Cl10S4Se2W2.ICSD.84360    | insulator  | insulator |
| Cl10Sc7.ICSD.1018         | metal      | metal     |

Supplementary Table 261. Five-fold cross validated predictions for the metal/insulator classification (253/598).

| system                    | calculated | predicted |
|---------------------------|------------|-----------|
| Cl10U2.ICSD.26089         | insulator  | insulator |
| Cl10W2.ICSD.2398          | insulator  | insulator |
| Cl11Cs1Hg5.ICSD.39767     | insulator  | insulator |
| Cl11Hg5Ti1.ICSD.14108     | insulator  | insulator |
| Cl11K1Nb2.ICSD.420871     | insulator  | insulator |
| Cl11N1Re2S2.ICSD.38379    | insulator  | insulator |
| Cl11N3P4.ICSD.71913       | insulator  | insulator |
| Cl12Hf1Se2.ICSD.404545    | insulator  | insulator |
| Cl12I2Nb6.ICSD.65968      | insulator  | insulator |
| Cl12Mo1Se2.ICSD.404535    | insulator  | insulator |
| Cl12Mo1Te2.ICSD.404224    | insulator  | insulator |
| Cl12N1P2Ta1.ICSD.280896   | insulator  | insulator |
| Cl12N1Sc7.ICSD.201976     | metal      | insulator |
| Cl12O2S2Ti2.ICSD.410940   | insulator  | insulator |
| Cl12O2S2Ti2.ICSD.410941   | insulator  | insulator |
| Cl12O2S2Zr2.ICSD.16128    | insulator  | insulator |
| Cl12O4P2Sb2.ICSD.49749    | insulator  | insulator |
| Cl12Os1S2.ICSD.74680      | insulator  | insulator |
| Cl12Os1Te2.ICSD.74682     | insulator  | insulator |
| Cl12Re1Te2.ICSD.68656     | insulator  | insulator |
| Cl12Re2S1.ICSD.411053     | insulator  | insulator |
| Cl12Sc7.ICSD.36424        | insulator  | metal     |
| Cl12Se2Zr1.ICSD.404533    | insulator  | insulator |
| Cl12Ta2Te4.ICSD.401907    | insulator  | insulator |
| Cl12Te4W2.ICSD.66023      | insulator  | insulator |
| Cl12Te4W2.ICSD.74789      | insulator  | insulator |
| Cl12Zr6.ICSD.41539        | metal      | insulator |
| Cl13Li1Mo6.ICSD.410368    | insulator  | insulator |
| Cl14Hg1Mo6.ICSD.26046     | insulator  | insulator |
| Cl14Mo4O4Ti2.ICSD.408774  | insulator  | insulator |
| Cl14Mo6Pb1.ICSD.36572     | insulator  | insulator |
| Cl14Nb6O4Ti2.ICSD.406839  | insulator  | insulator |
| Cl14O8P4V2.ICSD.420125    | insulator  | insulator |
| Cl15Co1Zr6.ICSD.71148     | insulator  | metal     |
| Cl15Ni1Zr6.ICSD.71149     | metal      | insulator |
| Cl16Ge6.ICSD.86673        | insulator  | insulator |
| Cl16Mo1Te3.ICSD.404954    | insulator  | insulator |
| Cl16O6P4Sn2.ICSD.26182    | insulator  | insulator |
| Cl16Re4S4Te4.ICSD.165333  | insulator  | insulator |
| Cl16Re4Se4Te4.ICSD.165334 | insulator  | insulator |
| Cl16Re4Te8.ICSD.165335    | insulator  | insulator |
| Cl16Ru2S6.ICSD.410112     | insulator  | insulator |
| Cl16Si6.ICSD.2767         | insulator  | insulator |
| Cl17P1W6.ICSD.422270      | insulator  | insulator |
| Cl18Cs2Pb1Ta6.ICSD.88711  | insulator  | insulator |
| Cl18Cs2W6.ICSD.109513     | insulator  | insulator |
| Cl18Cu2Nb6Rb2.ICSD.402275 | insulator  | insulator |
| Cl18In2Li2Nb6.ICSD.75071  | insulator  | insulator |
| Cl18In4Ta6.ICSD.78835     | insulator  | insulator |
| Cl18K2Mn1Nb6.ICSD.82102   | insulator  | insulator |

Supplementary Table 262. Five-fold cross validated predictions for the metal/insulator classification (254/598).

| system                    | calculated | predicted |
|---------------------------|------------|-----------|
| Cl18K2Nb6Sr1_ICSD_280933  | insulator  | insulator |
| Cl18K2W6_ICSD_260305      | insulator  | insulator |
| Cl18K2Zr7_ICSD_15278      | metal      | insulator |
| Cl18K4Nb6_ICSD_41118      | insulator  | insulator |
| Cl18K4Ta6_ICSD_59851      | insulator  | insulator |
| Cl18Mo2P2_ICSD_410649     | insulator  | insulator |
| Cl18Nb6Rb4_ICSD_402272    | insulator  | insulator |
| Cl18Nb6Ti2V1_ICSD_96347   | insulator  | insulator |
| Cl18P2Re2_ICSD_410188     | insulator  | insulator |
| Cl18P2Sn2_ICSD_60093      | insulator  | insulator |
| Cl18P2Ti2_ICSD_23137      | insulator  | insulator |
| Cl18Rb2W6_ICSD_260304     | insulator  | insulator |
| Cl18W6_ICSD_51513         | insulator  | insulator |
| Cl1Co1O3Sr2_ICSD_91750    | insulator  | insulator |
| Cl1Cr1Cs1O3_ICSD_6076     | insulator  | insulator |
| Cl1Cr1K1O3_ICSD_26591     | insulator  | insulator |
| Cl1Cr1O1_ICSD_4086        | insulator  | insulator |
| Cl1Cr1O3Rb1_ICSD_9030     | insulator  | insulator |
| Cl1Cr3O12Sr5_ICSD_37096   | insulator  | insulator |
| Cl1Cs1F3Sb1_ICSD_200296   | insulator  | insulator |
| Cl1Cs1Mn2O7V2_ICSD_418764 | insulator  | insulator |
| Cl1Cs1N1O4Tc1_ICSD_65802  | insulator  | insulator |
| Cl1Cs1O4_ICSD_33566       | insulator  | insulator |
| Cl1Cs1O4_ICSD_63364       | insulator  | insulator |
| Cl1Cs1_ICSD_52274         | insulator  | insulator |
| Cl1Cs1_ICSD_655032        | insulator  | insulator |
| Cl1Cs3O1_ICSD_401664      | insulator  | insulator |
| Cl1Cu1F10_ICSD_35387      | insulator  | insulator |
| Cl1Cu1H1O1_ICSD_38384     | metal      | insulator |
| Cl1Cu1H1O1_ICSD_91088     | insulator  | insulator |
| Cl1Cu1H3N1_ICSD_170946    | insulator  | insulator |
| Cl1Cu1Hg1S1_ICSD_412310   | insulator  | insulator |
| Cl1Cu1Hg1Se1_ICSD_16450   | insulator  | insulator |
| Cl1Cu1K4O15V5_ICSD_401042 | insulator  | insulator |
| Cl1Cu1La1Nb2O7_ICSD_88032 | insulator  | metal     |
| Cl1Cu1La1O7Ta2_ICSD_51261 | insulator  | insulator |
| Cl1Cu1Se2_ICSD_68292      | insulator  | insulator |
| Cl1Cu1Te2_ICSD_641        | insulator  | insulator |
| Cl1Cu1_ICSD_60711         | insulator  | insulator |
| Cl1Cu1_ICSD_78272         | insulator  | insulator |
| Cl1Cu1_ICSD_78273         | insulator  | insulator |
| Cl1Cu2H3O3_ICSD_51677     | metal      | insulator |
| Cl1Cu2H3O3_ICSD_64956     | metal      | insulator |
| Cl1Cu3S3Te1_ICSD_85789    | insulator  | insulator |
| Cl1Cu6In1O8_ICSD_69612    | metal      | insulator |
| Cl1Cu6O8Y1_ICSD_188351    | metal      | insulator |
| Cl1Dy1H2O2_ICSD_260833    | insulator  | insulator |
| Cl1Dy1Mo1O4_ICSD_420052   | insulator  | insulator |
| Cl1Dy1O3Se1_ICSD_418537   | insulator  | insulator |
| Cl1Dy1O3Ti1_ICSD_73096    | insulator  | insulator |

Supplementary Table 263. Five-fold cross validated predictions for the metal/insulator classification (255/598).

| system                       | calculated | predicted |
|------------------------------|------------|-----------|
| Cl1Dy1S1_ICSD_417434         | insulator  | insulator |
| Cl1Er1H1_ICSD_203143         | metal      | insulator |
| Cl1Er1H2O2_ICSD_260835       | insulator  | insulator |
| Cl1Er1Mo1O4_ICSD_420053      | insulator  | insulator |
| Cl1Er1O3Se1_ICSD_412861      | insulator  | insulator |
| Cl1Er1S1_ICSD_21009          | insulator  | insulator |
| Cl1Eu1F1_ICSD_108938         | insulator  | insulator |
| Cl1Eu1Mo1O4_ICSD_420054      | metal      | insulator |
| Cl1Eu1O1_ICSD_54682          | metal      | insulator |
| Cl1Eu1O3Se1_ICSD_418534      | metal      | insulator |
| Cl1Eu1O3Ti1_ICSD_73095       | insulator  | insulator |
| Cl1F10Sb1_ICSD_280731        | insulator  | insulator |
| Cl1F1Na6O8S2_ICSD_29330      | insulator  | insulator |
| Cl1F1O1Pb2_ICSD_200213       | insulator  | insulator |
| Cl1F1O7Pb2Se2Ti1_ICSD_189152 | insulator  | insulator |
| Cl1F1Pb1_ICSD_155010         | insulator  | insulator |
| Cl1F1Sn1_ICSD_647            | insulator  | insulator |
| Cl1F1Sr1_ICSD_159278         | insulator  | insulator |
| Cl1F1Yb1_ICSD_35390          | insulator  | insulator |
| Cl1F1_ICSD_406442            | insulator  | insulator |
| Cl1F3K1Sb1_ICSD_20656        | insulator  | insulator |
| Cl1F3Sn2_ICSD_200032         | insulator  | insulator |
| Cl1F3_ICSD_19079             | insulator  | insulator |
| Cl1F4N1O1_ICSD_50216         | insulator  | insulator |
| Cl1F5Ge1O2_ICSD_60108        | insulator  | insulator |
| Cl1F5N1Re1_ICSD_33542        | insulator  | insulator |
| Cl1F6K3Re1_ICSD_80170        | insulator  | insulator |
| Cl1F6O2Sb1_ICSD_173609       | insulator  | insulator |
| Cl1F8Nb1_ICSD_39501          | insulator  | insulator |
| Cl1F8Sb1_ICSD_9899           | insulator  | insulator |
| Cl1F8Ta1_ICSD_39502          | insulator  | insulator |
| Cl1Fe1Li1Mo1O4_ICSD_65346    | insulator  | insulator |
| Cl1Fe1Mo1O4_ICSD_202187      | insulator  | insulator |
| Cl1Fe1N3O3_ICSD_281495       | insulator  | insulator |
| Cl1Fe1O1_ICSD_27136          | metal      | insulator |
| Cl1Fe1O3Sr2_ICSD_93508       | insulator  | insulator |
| Cl1Fe1O4W1_ICSD_80798        | insulator  | insulator |
| Cl1Fe24K6Li1S26_ICSD_10398   | metal      | insulator |
| Cl1Fe2H3O12Te4_ICSD_50706    | insulator  | insulator |
| Cl1Fe2O4P1_ICSD_171          | insulator  | insulator |
| Cl1Fe3O8Pb4_ICSD_15521       | insulator  | insulator |
| Cl1Fe3O8Pb4_ICSD_9205        | insulator  | insulator |
| Cl1Ga1Te1_ICSD_15582         | insulator  | insulator |
| Cl1Gd1H2O2_ICSD_260831       | insulator  | insulator |
| Cl1Gd1Mo1O4_ICSD_420055      | insulator  | insulator |
| Cl1Gd1O1_ICSD_59232          | insulator  | insulator |
| Cl1Gd1O3Se1_ICSD_418535      | insulator  | insulator |
| Cl1Gd1O4S1_ICSD_410323       | insulator  | insulator |
| Cl1Gd1O4W1_ICSD_35292        | insulator  | insulator |
| Cl1Gd1O5Te2_ICSD_88674       | insulator  | insulator |

Supplementary Table 264. Five-fold cross validated predictions for the metal/insulator classification (256/598).

| system                       | calculated | predicted |
|------------------------------|------------|-----------|
| Cl1Ge1H3.ICSD_62109          | insulator  | insulator |
| Cl1H12N7P2.ICSD_405490       | insulator  | insulator |
| Cl1H13O6.ICSD_2235           | insulator  | insulator |
| Cl1H1Hg1O4.ICSD_29038        | insulator  | insulator |
| Cl1H1Hg1O4.ICSD_59874        | insulator  | insulator |
| Cl1H1O1Pb1.ICSD_28035        | insulator  | insulator |
| Cl1H1O1Pb1.ICSD_74291        | insulator  | insulator |
| Cl1H1O1Pb1.ICSD_76932        | insulator  | insulator |
| Cl1H1O1Sr1.ICSD_407719       | insulator  | insulator |
| Cl1H1O3Pb3.ICSD_94064        | insulator  | insulator |
| Cl1H1Sc1.ICSD_40981          | metal      | insulator |
| Cl1H1Sr1.ICSD_37200          | insulator  | insulator |
| Cl1H1.ICSD_28844             | insulator  | insulator |
| Cl1H1.ICSD_29079             | metal      | metal     |
| Cl1H2Hg1N1.ICSD_92480        | insulator  | insulator |
| Cl1H2Ho1O2.ICSD_260834       | insulator  | insulator |
| Cl1H2Li1O1.ICSD_281198       | insulator  | insulator |
| Cl1H2Lu1O2.ICSD_260841       | insulator  | insulator |
| Cl1H2Na1O5.ICSD_173          | insulator  | insulator |
| Cl1H2Nd1O2.ICSD_20047        | insulator  | insulator |
| Cl1H2O2Tb1.ICSD_260832       | insulator  | insulator |
| Cl1H2O2Yb1.ICSD_260837       | metal      | insulator |
| Cl1H2O2Yb1.ICSD_260840       | metal      | metal     |
| Cl1H2O6Rb1Se2Zn1.ICSD_409915 | insulator  | insulator |
| Cl1H3Li4O3.ICSD_74929        | insulator  | insulator |
| Cl1H3O5.ICSD_23866           | insulator  | insulator |
| Cl1H4N1O1.ICSD_14204         | insulator  | insulator |
| Cl1H4N1O1.ICSD_85479         | insulator  | insulator |
| Cl1H4N1O2.ICSD_59921         | insulator  | insulator |
| Cl1H4N1O4.ICSD_6241          | insulator  | insulator |
| Cl1H4Na1O2.ICSD_2313         | insulator  | insulator |
| Cl1H4Na1O6.ICSD_425697       | insulator  | insulator |
| Cl1H5N2O4.ICSD_9894          | insulator  | insulator |
| Cl1H5O2.ICSD_15353           | insulator  | insulator |
| Cl1H6Li1O7.ICSD_32534        | insulator  | insulator |
| Cl1H6Na1O5.ICSD_1954         | insulator  | insulator |
| Cl1Hf1N1.ICSD_261539         | insulator  | insulator |
| Cl1Hg2O12Rb3S3.ICSD_436      | insulator  | insulator |
| Cl1Hg2O12S3Ti3.ICSD_435      | insulator  | insulator |
| Cl1Hg2P3.ICSD_74771          | insulator  | insulator |
| Cl1Hg3I1S2.ICSD_250174       | insulator  | insulator |
| Cl1Hg3O4P1.ICSD_411756       | insulator  | insulator |
| Cl1Ho1Mo1O4.ICSD_420056      | insulator  | insulator |
| Cl1Ho1O3Se1.ICSD_418538      | insulator  | insulator |
| Cl1Ho1O3Te1.ICSD_95844       | insulator  | insulator |
| Cl1I1Sn1.ICSD_23262          | insulator  | insulator |
| Cl1I1.ICSD_23886             | insulator  | insulator |
| Cl1I1.ICSD_26032             | insulator  | insulator |
| Cl1In1K6Te4.ICSD_79543       | insulator  | insulator |
| Cl1In1O1.ICSD_24058          | insulator  | insulator |

Supplementary Table 265. Five-fold cross validated predictions for the metal/insulator classification (257/598).

| system                   | calculated | predicted |
|--------------------------|------------|-----------|
| Cl1In1O3Te1.ICSD_279576  | insulator  | insulator |
| Cl1In1S4Sb2.ICSD_159468  | insulator  | insulator |
| Cl1In1Te1.ICSD_21031     | insulator  | insulator |
| Cl1In1.ICSD_2429         | insulator  | insulator |
| Cl1In1.ICSD_2431         | metal      | insulator |
| Cl1In1.ICSD_2432         | insulator  | insulator |
| Cl1In1.ICSD_425449       | insulator  | insulator |
| Cl1In5S5.ICSD_414221     | insulator  | insulator |
| Cl1In5Se5.ICSD_414220    | insulator  | insulator |
| Cl1K1Mo1O5P1.ICSD_50988  | insulator  | insulator |
| Cl1K1O2.ICSD_59935       | insulator  | insulator |
| Cl1K1O3.ICSD_16690       | insulator  | insulator |
| Cl1K1O3.ICSD_26685       | insulator  | insulator |
| Cl1K1O3.ICSD_9483        | insulator  | insulator |
| Cl1K1O4.ICSD_33562       | insulator  | insulator |
| Cl1K1O4.ICSD_413444      | insulator  | insulator |
| Cl1K1.ICSD_240512        | insulator  | insulator |
| Cl1K1.ICSD_290514        | insulator  | insulator |
| Cl1K2Na1O6S2.ICSD_24677  | insulator  | insulator |
| Cl1K3O1S3W1.ICSD_10318   | insulator  | insulator |
| Cl1La1Nb2O6.ICSD_35428   | insulator  | insulator |
| Cl1La1O1.ICSD_24611      | insulator  | insulator |
| Cl1La1O4S1.ICSD_408944   | insulator  | insulator |
| Cl1La1Se1.ICSD_188001    | insulator  | insulator |
| Cl1La1Te1.ICSD_426279    | insulator  | insulator |
| Cl1La1.ICSD_24410        | metal      | metal     |
| Cl1La3O8Si2.ICSD_65023   | insulator  | insulator |
| Cl1La3S8Si2.ICSD_412221  | insulator  | insulator |
| Cl1La5Sn3.ICSD_95238     | metal      | metal     |
| Cl1Li1O2.ICSD_59936      | insulator  | insulator |
| Cl1Li1O4.ICSD_165579     | insulator  | insulator |
| Cl1Li1.ICSD_52235        | insulator  | insulator |
| Cl1Li4N1.ICSD_84649      | insulator  | insulator |
| Cl1Li6O5P1.ICSD_421479   | insulator  | insulator |
| Cl1Lu1O3Se1.ICSD_241239  | insulator  | insulator |
| Cl1Mg2O4P1.ICSD_2844     | insulator  | insulator |
| Cl1Mn1O3Sr2.ICSD_96044   | metal      | insulator |
| Cl1Mn1O3.ICSD_416749     | insulator  | insulator |
| Cl1Mn1S2Sb1.ICSD_151925  | insulator  | insulator |
| Cl1Mn2O4P1.ICSD_2813     | insulator  | insulator |
| Cl1Mo1O4Tb1.ICSD_420059  | insulator  | insulator |
| Cl1Mo1O4Tm1.ICSD_420060  | insulator  | insulator |
| Cl1Mo1O4Y1.ICSD_249647   | insulator  | insulator |
| Cl1Mo1O4Yb1.ICSD_420061  | metal      | insulator |
| Cl1Mo1O5P1Rb1.ICSD_50989 | insulator  | insulator |
| Cl1N1O1.ICSD_411511      | insulator  | insulator |
| Cl1N1O4S1.ICSD_27059     | insulator  | insulator |
| Cl1N1O6.ICSD_25817       | insulator  | insulator |
| Cl1N1Sr2.ICSD_410769     | insulator  | insulator |
| Cl1N1Ti1.ICSD_27396      | insulator  | insulator |

Supplementary Table 266. Five-fold cross validated predictions for the metal/insulator classification (258/598).

| system                     | calculated | predicted |
|----------------------------|------------|-----------|
| Cl1N1Zn2.ICSD.425734       | insulator  | insulator |
| Cl1N1Zr1.ICSD.25506        | insulator  | insulator |
| Cl1N1Zr1.ICSD.93740        | insulator  | insulator |
| Cl1N3O2S3.ICSD.36378       | insulator  | insulator |
| Cl1N3.ICSD.424502          | insulator  | insulator |
| Cl1N5S4.ICSD.14085         | insulator  | insulator |
| Cl1N5S5.ICSD.62528         | insulator  | insulator |
| Cl1Na1O3.ICSD.26684        | insulator  | insulator |
| Cl1Na1O4.ICSD.172567       | insulator  | insulator |
| Cl1Na1O4.ICSD.33567        | insulator  | insulator |
| Cl1Na1O4.ICSD.51730        | insulator  | insulator |
| Cl1Na1.ICSD.100633         | insulator  | insulator |
| Cl1Na1.ICSD.43434          | insulator  | insulator |
| Cl1Na3O1.ICSD.67319        | insulator  | insulator |
| Cl1Nb1O8Pb2Se2.ICSD.189153 | insulator  | insulator |
| Cl1Nd1O5Te2.ICSD.88673     | insulator  | insulator |
| Cl1Nd1Te1.ICSD.426777      | insulator  | insulator |
| Cl1Nd3O8Si2.ICSD.92490     | insulator  | insulator |
| Cl1O12P3Pb5.ICSD.24238     | insulator  | insulator |
| Cl1O12P3Sr5.ICSD.2089      | insulator  | insulator |
| Cl1O12Sr5V3.ICSD.171381    | insulator  | insulator |
| Cl1O1Ti1.ICSD.39314        | insulator  | insulator |
| Cl1O1V1.ICSD.27011         | insulator  | insulator |
| Cl1O1Y1.ICSD.31667         | insulator  | insulator |
| Cl1O1Y1.ICSD.60585         | insulator  | insulator |
| Cl1O1Yb1.ICSD.6077         | insulator  | insulator |
| Cl1O2Pb1Sb1.ICSD.86229     | insulator  | insulator |
| Cl1O2Rb1.ICSD.162802       | insulator  | insulator |
| Cl1O2.ICSD.67665           | insulator  | insulator |
| Cl1O3Pb1V1.ICSD.420548     | insulator  | insulator |
| Cl1O3Rb1.ICSD.10283        | insulator  | insulator |
| Cl1O3Sb1Te1.ICSD.86095     | insulator  | insulator |
| Cl1O3Se1Tb1.ICSD.418536    | insulator  | insulator |
| Cl1O3Se1Yb1.ICSD.418541    | metal      | insulator |
| Cl1O3Sr1V1.ICSD.50787      | insulator  | insulator |
| Cl1O3Ti1.ICSD.76434        | insulator  | insulator |
| Cl1O4P1Sn2.ICSD.16519      | insulator  | insulator |
| Cl1O4Pb1Re1.ICSD.171147    | insulator  | insulator |
| Cl1O4Rb1S1Zn1.ICSD.386     | insulator  | insulator |
| Cl1O4Rb1.ICSD.33565        | insulator  | insulator |
| Cl1O4Rb1.ICSD.51728        | insulator  | insulator |
| Cl1O4S1Ti1Zn1.ICSD.387     | insulator  | insulator |
| Cl1O4Sb3.ICSD.410039       | insulator  | insulator |
| Cl1O4Ti1.ICSD.33564        | insulator  | insulator |
| Cl1O9Re1S2.ICSD.419178     | insulator  | insulator |
| Cl1Rb1.ICSD.18016          | insulator  | insulator |
| Cl1Rb1.ICSD.61521          | insulator  | insulator |
| Cl1Rh1Te1.ICSD.56853       | insulator  | insulator |
| Cl1Sc1.ICSD.1004           | metal      | metal     |
| Cl1Tb1.ICSD.23352          | metal      | metal     |

Supplementary Table 267. Five-fold cross validated predictions for the metal/insulator classification (259/598).

| system                     | calculated | predicted |
|----------------------------|------------|-----------|
| Cl1Ti1.ICSD.109143         | insulator  | insulator |
| Cl1Ti1.ICSD.29107          | insulator  | insulator |
| Cl1Ti1.ICSD.61518          | insulator  | insulator |
| Cl1Y1.ICSD.61107           | metal      | metal     |
| Cl1Zr1.ICSD.20145          | metal      | metal     |
| Cl1Zr1.ICSD.868            | metal      | metal     |
| Cl2Co1H12O6.ICSD.34429     | insulator  | insulator |
| Cl2Co1H4O2.ICSD.34651      | insulator  | insulator |
| Cl2Co1O2Sr2.ICSD.59697     | metal      | metal     |
| Cl2Co1O6Se2Sr2.ICSD.419615 | metal      | insulator |
| Cl2Co1O8.ICSD.33288        | insulator  | insulator |
| Cl2Co1.ICSD.15939          | insulator  | insulator |
| Cl2Co2O3Te1.ICSD.415798    | insulator  | insulator |
| Cl2Co5O12Se4.ICSD.416965   | insulator  | insulator |
| Cl2Cr1H12I1N4.ICSD.48186   | insulator  | insulator |
| Cl2Cr1O2.ICSD.416750       | insulator  | insulator |
| Cl2Cr1.ICSD.27490          | insulator  | insulator |
| Cl2Cr3F6K2.ICSD.60897      | insulator  | insulator |
| Cl2Cs1Cu2I1.ICSD.60960     | insulator  | insulator |
| Cl2Cs1I1.ICSD.14260        | insulator  | insulator |
| Cl2Cs1K1O8.ICSD.22504      | insulator  | insulator |
| Cl2Cs1Li1.ICSD.35397       | insulator  | insulator |
| Cl2Cs1Li1.ICSD.423634      | insulator  | insulator |
| Cl2Cu1H4O2.ICSD.15087      | insulator  | insulator |
| Cl2Cu1H4O4Pb2.ICSD.81589   | insulator  | insulator |
| Cl2Cu1H6N2.ICSD.180189     | insulator  | insulator |
| Cl2Cu1K2O4S1.ICSD.22364    | insulator  | insulator |
| Cl2Cu1O2Sr2.ICSD.67067     | metal      | metal     |
| Cl2Cu1O6Se2Sr2.ICSD.174067 | insulator  | insulator |
| Cl2Cu1.ICSD.66645          | insulator  | insulator |
| Cl2Cu2O1.ICSD.96610        | insulator  | insulator |
| Cl2Cu2O5Te2.ICSD.89978     | insulator  | insulator |
| Cl2Cu2O6Pb1Se2.ICSD.189154 | insulator  | insulator |
| Cl2Cu2O6Pb1Te2.ICSD.189155 | insulator  | insulator |
| Cl2Cu2O6Se2Sr1.ICSD.174068 | insulator  | insulator |
| Cl2Cu2O6Sr1Te2.ICSD.416653 | insulator  | insulator |
| Cl2Cu3H6Mg1O6.ICSD.240663  | insulator  | insulator |
| Cl2Cu3H6Ni1O6.ICSD.415857  | metal      | insulator |
| Cl2Cu3H6O6Zn1.ICSD.425834  | insulator  | metal     |
| Cl2Cu3O4Sr2.ICSD.427       | metal      | metal     |
| Cl2Cu3O6Se2.ICSD.240496    | insulator  | insulator |
| Cl2Cu3O6Se2.ICSD.92165     | insulator  | insulator |
| Cl2Cu5O8Se2.ICSD.8163      | insulator  | insulator |
| Cl2F12Pb7.ICSD.10402       | insulator  | insulator |
| Cl2F1Tb1.ICSD.418279       | insulator  | insulator |
| Cl2F2I2O2.ICSD.411237      | insulator  | insulator |
| Cl2F2N3O2P1S2.ICSD.2352    | insulator  | insulator |
| Cl2F6I1Sb1.ICSD.15526      | insulator  | insulator |
| Cl2Fe1H4O2.ICSD.15597      | insulator  | insulator |
| Cl2Fe1H8O4.ICSD.9488       | insulator  | insulator |

Supplementary Table 268. Five-fold cross validated predictions for the metal/insulator classification (260/598).

| system                      | calculated | predicted |
|-----------------------------|------------|-----------|
| Cl2Fe1.ICSD_64830           | metal      | insulator |
| Cl2Fe1.ICSD_64831           | insulator  | insulator |
| Cl2Fe5O18Te6.ICSD_245637    | insulator  | insulator |
| Cl2Ga6Li8O24Si6.ICSD_87987  | insulator  | insulator |
| Cl2Ga6Na8O24Si6.ICSD_417705 | insulator  | insulator |
| Cl2Ge3La3.ICSD_414173       | metal      | metal     |
| Cl2H12Mg1O6.ICSD_34694      | insulator  | insulator |
| Cl2H12N4O8Zn1.ICSD_74790    | insulator  | insulator |
| Cl2H12Ni1O6.ICSD_22284      | insulator  | insulator |
| Cl2H12O6Sr1.ICSD_48110      | insulator  | insulator |
| Cl2H12Sr7.ICSD_418948       | insulator  | insulator |
| Cl2H1K3O6Pt1S2.ICSD_16439   | insulator  | insulator |
| Cl2H1N1O4S2.ICSD_165233     | insulator  | insulator |
| Cl2H2Mg1O1.ICSD_172993      | insulator  | insulator |
| Cl2H2Mo1O3.ICSD_25031       | insulator  | insulator |
| Cl2H2O1Sr1.ICSD_60883       | insulator  | insulator |
| Cl2H4Mg1O10.ICSD_261132     | insulator  | insulator |
| Cl2H4Mg1O2.ICSD_172992      | insulator  | insulator |
| Cl2H4Mn1O2.ICSD_15596       | insulator  | insulator |
| Cl2H4O6Zn1.ICSD_8231        | insulator  | insulator |
| Cl2H6N2.ICSD_23145          | insulator  | insulator |
| Cl2H6N2.ICSD_240903         | insulator  | insulator |
| Cl2H8Mg1O12.ICSD_261131     | insulator  | insulator |
| Cl2H8Mg1O12.ICSD_262271     | insulator  | insulator |
| Cl2H8Mn1N4.ICSD_25784       | insulator  | insulator |
| Cl2H8N2O2Pt1.ICSD_35759     | insulator  | insulator |
| Cl2H8N2O2Pt1.ICSD_35760     | insulator  | insulator |
| Cl2H8N4Zn1.ICSD_15875       | insulator  | insulator |
| Cl2Hg1O2Pb2.ICSD_74973      | insulator  | insulator |
| Cl2Hg1.ICSD_23277           | insulator  | insulator |
| Cl2Hg2O6.ICSD_412963        | metal      | insulator |
| Cl2Hg2.ICSD_31173           | insulator  | insulator |
| Cl2Hg3O2.ICSD_28399         | insulator  | insulator |
| Cl2Hg3S2.ICSD_27399         | insulator  | insulator |
| Cl2Hg3Se2.ICSD_27400        | insulator  | insulator |
| Cl2Hg3Te2.ICSD_27401        | insulator  | insulator |
| Cl2Hg4O2.ICSD_16662         | insulator  | insulator |
| Cl2Hg5O4.ICSD_24593         | metal      | insulator |
| Cl2I1N3S4.ICSD_412782       | insulator  | insulator |
| Cl2I2Ta1.ICSD_69688         | insulator  | insulator |
| Cl2K2N2O4Pd1.ICSD_39851     | metal      | insulator |
| Cl2K5Na1O12S4.ICSD_24676    | insulator  | insulator |
| Cl2La3Si3.ICSD_408031       | metal      | metal     |
| Cl2Li5N1.ICSD_84763         | insulator  | insulator |
| Cl2Mg1O8.ICSD_261619        | insulator  | insulator |
| Cl2Mg1.ICSD_17063           | insulator  | insulator |
| Cl2Mg1.ICSD_51244           | insulator  | insulator |
| Cl2Mg1.ICSD_51245           | insulator  | insulator |
| Cl2Mg1.ICSD_51246           | insulator  | insulator |
| Cl2Mg1.ICSD_51247           | insulator  | insulator |

Supplementary Table 269. Five-fold cross validated predictions for the metal/insulator classification (261/598).

| system                     | calculated | predicted |
|----------------------------|------------|-----------|
| Cl2Mg1.ICSD_56147          | insulator  | insulator |
| Cl2Mn1.ICSD_33752          | insulator  | insulator |
| Cl2N1Sc2.ICSD_59125        | metal      | insulator |
| Cl2N2O4Pd1Rb2.ICSD_93914   | insulator  | insulator |
| Cl2N2S2Te1.ICSD_170631     | insulator  | insulator |
| Cl2N2S3.ICSD_23974         | insulator  | insulator |
| Cl2N3S2V1.ICSD_30742       | insulator  | insulator |
| Cl2N4O12S10.ICSD_72781     | insulator  | insulator |
| Cl2N4S4.ICSD_26373         | insulator  | insulator |
| Cl2Nb1S2.ICSD_10484        | insulator  | insulator |
| Cl2Nb1Se2.ICSD_10483       | insulator  | insulator |
| Cl2Nd2O7Ta2.ICSD_108807    | insulator  | insulator |
| Cl2Ni1O8.ICSD_33289        | insulator  | insulator |
| Cl2Ni1.ICSD_14208          | insulator  | insulator |
| Cl2Ni2O8Sr1Te3.ICSD_418683 | insulator  | insulator |
| Cl2Ni7O18Te6.ICSD_240326   | insulator  | insulator |
| Cl2O1Os1.ICSD_83884        | metal      | metal     |
| Cl2O1Pd2.ICSD_61333        | insulator  | insulator |
| Cl2O1Ru1.ICSD_83883        | metal      | insulator |
| Cl2O1S1.ICSD_62971         | insulator  | insulator |
| Cl2O1V1.ICSD_24380         | insulator  | insulator |
| Cl2O1.ICSD_407768          | insulator  | insulator |
| Cl2O2Pb3.ICSD_23521        | insulator  | insulator |
| Cl2O2U1.ICSD_36056         | insulator  | insulator |
| Cl2O4Pb1.ICSD_68484        | insulator  | insulator |
| Cl2O4Pb4.ICSD_30292        | metal      | insulator |
| Cl2O4Sr1.ICSD_171021       | insulator  | insulator |
| Cl2O5Sb4.ICSD_2233         | insulator  | insulator |
| Cl2O6Pb1.ICSD_40286        | insulator  | insulator |
| Cl2O6Pb2Pd1Se2.ICSD_423573 | insulator  | insulator |
| Cl2O6Pb2Pd1Te2.ICSD_423574 | insulator  | insulator |
| Cl2O6Pb3Te2.ICSD_281171    | insulator  | insulator |
| Cl2O6Sr1.ICSD_61157        | insulator  | insulator |
| Cl2O6.ICSD_62063           | insulator  | insulator |
| Cl2O7Pr2Ta2.ICSD_108806    | insulator  | insulator |
| Cl2O7.ICSD_63680           | insulator  | insulator |
| Cl2Pb1.ICSD_15806          | metal      | insulator |
| Cl2Pb1.ICSD_43344          | insulator  | insulator |
| Cl2Pb1.ICSD_81978          | insulator  | insulator |
| Cl2Pd1Se6.ICSD_405207      | insulator  | insulator |
| Cl2Pd1.ICSD_404624         | insulator  | insulator |
| Cl2Pd1.ICSD_421219         | insulator  | insulator |
| Cl2Pd1.ICSD_421220         | insulator  | insulator |
| Cl2Pd1.ICSD_421221         | insulator  | insulator |
| Cl2Pt1.ICSD_28527          | insulator  | insulator |
| Cl2Re6S8.ICSD_67658        | insulator  | insulator |
| Cl2Re6Se8.ICSD_35623       | insulator  | insulator |
| Cl2Ru1Te8.ICSD_422366      | insulator  | insulator |
| Cl2S1.ICSD_38351           | insulator  | insulator |
| Cl2S2.ICSD_37016           | metal      | insulator |

Supplementary Table 270. Five-fold cross validated predictions for the metal/insulator classification (262/598).

| system                | calculated | predicted |
|-----------------------|------------|-----------|
| Cl2Se2.ICSD_37018     | insulator  | insulator |
| Cl2Si1.ICSD_85526     | insulator  | insulator |
| Cl2Sn1.ICSD_15452     | insulator  | insulator |
| Cl2Sn1.ICSD_81977     | insulator  | insulator |
| Cl2Sn1.ICSD_81979     | metal      | insulator |
| Cl2Sr1.ICSD_18011     | insulator  | insulator |
| Cl2Te3.ICSD_105       | metal      | insulator |
| Cl2Ti1.ICSD_23177     | insulator  | insulator |
| Cl2Ti1.ICSD_38219     | insulator  | insulator |
| Cl2Tm1.ICSD_447       | insulator  | insulator |
| Cl2V1.ICSD_15901      | insulator  | insulator |
| Cl2V1.ICSD_246905     | insulator  | insulator |
| Cl2Yb1.ICSD_6054      | insulator  | insulator |
| Cl2Zn1.ICSD_1692      | insulator  | insulator |
| Cl2Zn1.ICSD_26152     | insulator  | insulator |
| Cl2Zn1.ICSD_26154     | insulator  | insulator |
| Cl2Zr1.ICSD_20144     | insulator  | insulator |
| Cl2.ICSD_201696       | insulator  | insulator |
| Cl2.ICSD_22406        | insulator  | insulator |
| Cl3Co1Cs1.ICSD_27511  | insulator  | insulator |
| Cl3Co1Rb1.ICSD_24305  | insulator  | insulator |
| Cl3Co1Ti1.ICSD_155189 | insulator  | insulator |
| Cl3Co1Ti1.ICSD_155191 | insulator  | insulator |
| Cl3Cr1Cs1.ICSD_36132  | metal      | insulator |
| Cl3Cr1Cs1.ICSD_41802  | insulator  | insulator |
| Cl3Cr1Rb1.ICSD_2225   | insulator  | insulator |
| Cl3Cr1Rb1.ICSD_56837  | insulator  | insulator |
| Cl3Cr1Rb1.ICSD_8184   | insulator  | insulator |
| Cl3Cr1.ICSD_22080     | insulator  | insulator |
| Cl3Cr1.ICSD_22081     | insulator  | insulator |
| Cl3Cr1.ICSD_33578     | insulator  | insulator |
| Cl3Cs1Cu1.ICSD_26666  | insulator  | insulator |
| Cl3Cs1Cu2.ICSD_14201  | insulator  | insulator |
| Cl3Cs1Fe1.ICSD_300249 | insulator  | insulator |
| Cl3Cs1Ge1.ICSD_23121  | insulator  | insulator |
| Cl3Cs1Ge1.ICSD_75215  | insulator  | insulator |
| Cl3Cs1Hg1.ICSD_24482  | metal      | insulator |
| Cl3Cs1Li2.ICSD_245974 | insulator  | insulator |
| Cl3Cs1Li2.ICSD_423635 | insulator  | insulator |
| Cl3Cs1Mg1.ICSD_54167  | insulator  | insulator |
| Cl3Cs1Mn1.ICSD_2555   | insulator  | insulator |
| Cl3Cs1Ni1.ICSD_60262  | insulator  | insulator |
| Cl3Cs1Pb1.ICSD_109294 | insulator  | insulator |
| Cl3Cs1Pb1.ICSD_201250 | insulator  | insulator |
| Cl3Cs1Sc1.ICSD_10474  | metal      | insulator |
| Cl3Cs1Sn1.ICSD_14199  | insulator  | insulator |
| Cl3Cs1Sn1.ICSD_28082  | insulator  | insulator |
| Cl3Cs1V1.ICSD_201832  | insulator  | insulator |
| Cl3Cs1Yb1.ICSD_31461  | insulator  | insulator |
| Cl3Cu1K1.ICSD_15590   | insulator  | insulator |

Supplementary Table 271. Five-fold cross validated predictions for the metal/insulator classification (263/598).

| system                   | calculated | predicted |
|--------------------------|------------|-----------|
| Cl3Cu1K2.ICSD_150292     | insulator  | insulator |
| Cl3Cu1K2.ICSD_30656      | metal      | insulator |
| Cl3Cu1Rb1.ICSD_15523     | insulator  | insulator |
| Cl3Cu1Rb1.ICSD_40944     | insulator  | insulator |
| Cl3Cu1Rb1.ICSD_56838     | insulator  | insulator |
| Cl3Cu1Rb1.ICSD_84212     | metal      | insulator |
| Cl3Cu1Rb2.ICSD_150294    | insulator  | insulator |
| Cl3Dy1.ICSD_40064        | insulator  | insulator |
| Cl3Er1H2O13.ICSD_410764  | insulator  | insulator |
| Cl3Eu1.ICSD_23148        | metal      | insulator |
| Cl3F2Rb2Sb1.ICSD_200497  | insulator  | insulator |
| Cl3F2Sb1.ICSD_200039     | insulator  | insulator |
| Cl3F2Sb1.ICSD_380014     | insulator  | insulator |
| Cl3F3N3P3.ICSD_16098     | insulator  | insulator |
| Cl3Fe1K1.ICSD_10134      | insulator  | insulator |
| Cl3Fe1Mn7O10.ICSD_69062  | insulator  | insulator |
| Cl3Fe1.ICSD_27500        | insulator  | insulator |
| Cl3Fe1.ICSD_39765        | insulator  | insulator |
| Cl3Ga1.ICSD_30336        | insulator  | insulator |
| Cl3Ga1.ICSD_413455       | insulator  | insulator |
| Cl3Gd1.ICSD_22270        | insulator  | insulator |
| Cl3Gd2N1.ICSD_47224      | insulator  | insulator |
| Cl3Gd2.ICSD_9580         | insulator  | insulator |
| Cl3Ge1Rb1.ICSD_12149     | insulator  | insulator |
| Cl3H12N5O1Os1.ICSD_39306 | insulator  | insulator |
| Cl3H12O6V1.ICSD_418528   | insulator  | insulator |
| Cl3H1La3O6Ta1.ICSD_62189 | insulator  | insulator |
| Cl3H4K1Mn1O2.ICSD_14170  | insulator  | insulator |
| Cl3H6La1O9.ICSD_29439    | insulator  | insulator |
| Cl3Hg1Na1.ICSD_38302     | insulator  | insulator |
| Cl3I1N1V1.ICSD_10470     | insulator  | insulator |
| Cl3Ir1Te6.ICSD_423672    | insulator  | insulator |
| Cl3Ir1.ICSD_23171        | insulator  | insulator |
| Cl3Ir1.ICSD_25716        | metal      | metal     |
| Cl3K1Mn1.ICSD_32710      | insulator  | insulator |
| Cl3K2N3O5Os1.ICSD_39424  | insulator  | insulator |
| Cl3K2N3O5Ru1.ICSD_97229  | insulator  | insulator |
| Cl3K2N3O6Pt1.ICSD_20709  | insulator  | insulator |
| Cl3La1.ICSD_31574        | insulator  | insulator |
| Cl3La2N1.ICSD_165789     | insulator  | insulator |
| Cl3La3O6U1.ICSD_73201    | insulator  | insulator |
| Cl3La3O6W1.ICSD_35595    | insulator  | insulator |
| Cl3La3O7Si2.ICSD_82386   | insulator  | insulator |
| Cl3La4N1S3.ICSD_74902    | insulator  | insulator |
| Cl3Mg1Rb1.ICSD_15279     | insulator  | insulator |
| Cl3Mg1Rb1.ICSD_4036      | insulator  | insulator |
| Cl3Mn1Na1.ICSD_2552      | insulator  | insulator |
| Cl3Mn1Rb1.ICSD_36125     | insulator  | insulator |
| Cl3Mn1Ti1.ICSD_23167     | insulator  | insulator |
| Cl3Mn1Ti1.ICSD_32712     | insulator  | insulator |

Supplementary Table 272. Five-fold cross validated predictions for the metal/insulator classification (264/598).

| system                   | calculated | predicted |
|--------------------------|------------|-----------|
| Cl3Mo1N1.ICSD_15117      | insulator  | insulator |
| Cl3Mo1O1.ICSD_4411       | insulator  | insulator |
| Cl3Mo1S2.ICSD_28062      | insulator  | insulator |
| Cl3Mo1.ICSD_26109        | insulator  | insulator |
| Cl3Mo1.ICSD_83878        | insulator  | insulator |
| Cl3N1Nd2.ICSD_79944      | insulator  | insulator |
| Cl3N1Nd4S3.ICSD_92443    | insulator  | insulator |
| Cl3N1Pr2.ICSD_79943      | insulator  | insulator |
| Cl3N1Se2.ICSD_84030      | insulator  | insulator |
| Cl3N1W1.ICSD_165376      | insulator  | insulator |
| Cl3N1Y2.ICSD_65829       | insulator  | insulator |
| Cl3N1.ICSD_4034          | insulator  | insulator |
| Cl3N3S3.ICSD_30558       | insulator  | insulator |
| Cl3N3Ti1.ICSD_15996      | insulator  | insulator |
| Cl3Nb1O1.ICSD_26471      | insulator  | insulator |
| Cl3Nb1O1.ICSD_412071     | insulator  | insulator |
| Cl3Nd1.ICSD_31577        | insulator  | insulator |
| Cl3Nd3O6U1.ICSD_73203    | insulator  | insulator |
| Cl3Ni1Rb1.ICSD_15010     | insulator  | insulator |
| Cl3O10Se2Tb5.ICSD_154235 | insulator  | insulator |
| Cl3O12Yb1.ICSD_85762     | metal      | insulator |
| Cl3O1P1.ICSD_9128        | insulator  | insulator |
| Cl3O1V1.ICSD_250365      | insulator  | insulator |
| Cl3O2Re1.ICSD_416056     | insulator  | insulator |
| Cl3O6Pr3U1.ICSD_73202    | insulator  | insulator |
| Cl3O6Pr3W1.ICSD_20626    | insulator  | insulator |
| Cl3P1.ICSD_32027         | insulator  | insulator |
| Cl3Pr1.ICSD_202925       | insulator  | insulator |
| Cl3Pr1.ICSD_65079        | insulator  | insulator |
| Cl3Pr3Ru1.ICSD_173604    | metal      | metal     |
| Cl3Pu1.ICSD_31572        | metal      | metal     |
| Cl3Pu1.ICSD_38195        | metal      | metal     |
| Cl3Rb1Ti1.ICSD_49747     | insulator  | insulator |
| Cl3Rb1V1.ICSD_201830     | insulator  | insulator |
| Cl3Rh1.ICSD_25764        | insulator  | insulator |
| Cl3Ru1.ICSD_20717        | insulator  | insulator |
| Cl3Ru1.ICSD_22092        | metal      | insulator |
| Cl3Ru1.ICSD_414041       | insulator  | insulator |
| Cl3S8Sb1.ICSD_35741      | insulator  | insulator |
| Cl3Sb1.ICSD_8258         | insulator  | insulator |
| Cl3Sc1.ICSD_74517        | insulator  | insulator |
| Cl3Tb1.ICSD_23938        | insulator  | insulator |
| Cl3Tb1.ICSD_63541        | insulator  | insulator |
| Cl3Tb1.ICSD_63543        | insulator  | insulator |
| Cl3Tc1.ICSD_261105       | insulator  | insulator |
| Cl3Tc1.ICSD_262639       | metal      | insulator |
| Cl3Ti1.ICSD_26069        | metal      | insulator |
| Cl3Ti1.ICSD_26070        | insulator  | insulator |
| Cl3Ti1.ICSD_29035        | insulator  | insulator |
| Cl3Ti1.ICSD_39426        | insulator  | insulator |

Supplementary Table 273. Five-fold cross validated predictions for the metal/insulator classification (265/598).

| system                      | calculated | predicted |
|-----------------------------|------------|-----------|
| Cl3Ti1.ICSD_39427           | insulator  | insulator |
| Cl3Ti1.ICSD_39429           | insulator  | insulator |
| Cl3Ti1.ICSD_39430           | insulator  | insulator |
| Cl3Tm1.ICSD_35398           | metal      | insulator |
| Cl3U1.ICSD_2353             | insulator  | insulator |
| Cl3V1.ICSD_38237            | insulator  | insulator |
| Cl3Y1.ICSD_15684            | insulator  | insulator |
| Cl3Y2.ICSD_23337            | insulator  | insulator |
| Cl3Zr1.ICSD_35315           | metal      | metal     |
| Cl3Zr1.ICSD_43292           | metal      | insulator |
| Cl4Co1K2.ICSD_661           | insulator  | insulator |
| Cl4Co1Li2.ICSD_73227        | insulator  | insulator |
| Cl4Co1Rb2.ICSD_87515        | insulator  | insulator |
| Cl4Co1Rb2.ICSD_87517        | insulator  | insulator |
| Cl4Cr1Cs2.ICSD_41571        | insulator  | insulator |
| Cl4Cr1Li2.ICSD_202627       | insulator  | insulator |
| Cl4Cr1Li2.ICSD_403035       | insulator  | insulator |
| Cl4Cr1Na2.ICSD_66201        | insulator  | insulator |
| Cl4Cr1Rb2.ICSD_41570        | insulator  | insulator |
| Cl4Cr1Rb2.ICSD_47129        | metal      | insulator |
| Cl4Cr1Rb2.ICSD_9858         | insulator  | insulator |
| Cl4Cs1Ga1.ICSD_201670       | insulator  | insulator |
| Cl4Cs2Hg1.ICSD_39568        | insulator  | insulator |
| Cl4Cs2I2Pd1.ICSD_240484     | insulator  | insulator |
| Cl4Cs2Mg1.ICSD_9005         | insulator  | insulator |
| Cl4Cs2O2U1.ICSD_56859       | insulator  | insulator |
| Cl4Cs2O2U1.ICSD_66542       | insulator  | insulator |
| Cl4Cs2Pd1.ICSD_95812        | insulator  | insulator |
| Cl4Cs2Yb1.ICSD_49623        | insulator  | insulator |
| Cl4Cs3Li1.ICSD_245969       | insulator  | insulator |
| Cl4Cs6O1.ICSD_411634        | insulator  | insulator |
| Cl4Cu1Ga1.ICSD_300103       | insulator  | insulator |
| Cl4Cu1H12N2O2.ICSD_23750    | metal      | metal     |
| Cl4Cu1H4K2O2.ICSD_16052     | insulator  | insulator |
| Cl4Cu1H4O2Rb2.ICSD_71867    | insulator  | insulator |
| Cl4Cu1Rb2.ICSD_15145        | insulator  | insulator |
| Cl4Cu3O12Te4Yb2.ICSD_419113 | metal      | insulator |
| Cl4Cu4S4W1.ICSD_171240      | metal      | insulator |
| Cl4Er1Na1.ICSD_82364        | insulator  | insulator |
| Cl4F1Sb1.ICSD_74783         | insulator  | insulator |
| Cl4F1Ta1.ICSD_27413         | insulator  | insulator |
| Cl4F5N1Te1W1.ICSD_37149     | insulator  | insulator |
| Cl4F6Ir1.ICSD_411351        | metal      | insulator |
| Cl4F6P1Sb1.ICSD_71876       | insulator  | insulator |
| Cl4Fe1K1.ICSD_63469         | metal      | insulator |
| Cl4Fe1Na1.ICSD_16994        | insulator  | insulator |
| Cl4Fe1Rb1.ICSD_63470        | insulator  | insulator |
| Cl4Ga1K1.ICSD_281297        | insulator  | insulator |
| Cl4Ga1Li1.ICSD_60849        | insulator  | insulator |
| Cl4Ga1Rb1.ICSD_409650       | insulator  | insulator |

Supplementary Table 274. Five-fold cross validated predictions for the metal/insulator classification (266/598).

| system                       | calculated | predicted |
|------------------------------|------------|-----------|
| Cl4Ga1Ti1.ICSD_419825        | insulator  | insulator |
| Cl4Ga2H2.ICSD_165558         | insulator  | insulator |
| Cl4Ga2.ICSD_14218            | insulator  | insulator |
| Cl4Gd1Li1.ICSD_38326         | insulator  | insulator |
| Cl4Gd1Na1.ICSD_33784         | insulator  | insulator |
| Cl4Gd2S1.ICSD_56742          | insulator  | insulator |
| Cl4Ge1.ICSD_280880           | insulator  | insulator |
| Cl4H10O5Sn1.ICSD_413631      | insulator  | insulator |
| Cl4H18K1N6O8Ru1.ICSD_280489  | insulator  | insulator |
| Cl4H18N6O8Rb1Ru1.ICSD_280492 | metal      | insulator |
| Cl4H26O14Sc2.ICSD_39838      | insulator  | insulator |
| Cl4H2Hg1K2O1.ICSD_30211      | insulator  | insulator |
| Cl4H4N1Ti1.ICSD_14020        | insulator  | insulator |
| Cl4H8Si5.ICSD_262931         | insulator  | insulator |
| Cl4Hf1.ICSD_402054           | insulator  | insulator |
| Cl4Hg2K2O3S1.ICSD_419256     | insulator  | insulator |
| Cl4Hg3O1.ICSD_35649          | insulator  | insulator |
| Cl4Hg3S2Zn1.ICSD_420783      | insulator  | insulator |
| Cl4Hg4I2S1.ICSD_422546       | insulator  | insulator |
| Cl4I1K1.ICSD_30203           | insulator  | insulator |
| Cl4I2O6Pb3.ICSD_247144       | insulator  | insulator |
| Cl4K1Ti1.ICSD_14105          | insulator  | insulator |
| Cl4K2Mg1.ICSD_4035           | insulator  | insulator |
| Cl4K2O2Os1.ICSD_36231        | insulator  | insulator |
| Cl4K2Pd1.ICSD_2723           | insulator  | insulator |
| Cl4K2Pt1.ICSD_68768          | insulator  | insulator |
| Cl4K2Zn1.ICSD_68824          | insulator  | insulator |
| Cl4K2Zn1.ICSD_80861          | insulator  | insulator |
| Cl4Li2Zn1.ICSD_202743        | insulator  | insulator |
| Cl4Li2Zn1.ICSD_73222         | insulator  | insulator |
| Cl4Lu1Na1.ICSD_78994         | insulator  | insulator |
| Cl4Mg1Na2.ICSD_69343         | insulator  | insulator |
| Cl4Mn1Na2.ICSD_9136          | insulator  | insulator |
| Cl4Mn1Rb2.ICSD_1139          | insulator  | insulator |
| Cl4Mo1O1.ICSD_41418          | insulator  | insulator |
| Cl4N1Re1.ICSD_419181         | insulator  | insulator |
| Cl4N1V1.ICSD_28128           | insulator  | insulator |
| Cl4N4S4Te1.ICSD_416253       | insulator  | insulator |
| Cl4Na1Sc1.ICSD_402273        | insulator  | insulator |
| Cl4Na2Pd1.ICSD_202971        | insulator  | insulator |
| Cl4Na2Ti1.ICSD_400264        | insulator  | insulator |
| Cl4Na2Zn1.ICSD_402063        | insulator  | insulator |
| Cl4O1Os1.ICSD_417247         | insulator  | insulator |
| Cl4O1Rb6.ICSD_405193         | insulator  | insulator |
| Cl4O1W1.ICSD_426524          | insulator  | insulator |
| Cl4Os1Sc4.ICSD_421532        | insulator  | insulator |
| Cl4Os1.ICSD_1165             | insulator  | insulator |
| Cl4Pa1.ICSD_9309             | metal      | insulator |
| Cl4Pd1Ti2.ICSD_89601         | insulator  | insulator |
| Cl4Pt1.ICSD_22073            | insulator  | insulator |

Supplementary Table 275. Five-fold cross validated predictions for the metal/insulator classification (267/598).

| system                   | calculated | predicted |
|--------------------------|------------|-----------|
| Cl4Rb2Zn1.ICSD_35657     | insulator  | insulator |
| Cl4Rb2Zn1.ICSD_63188     | insulator  | insulator |
| Cl4Rb2Zn1.ICSD_68569     | insulator  | insulator |
| Cl4Re1.ICSD_10293        | metal      | insulator |
| Cl4Re6Se8Ti2.ICSD_162300 | insulator  | insulator |
| Cl4S1Sm2.ICSD_89534      | insulator  | insulator |
| Cl4S1Ti6.ICSD_35289      | insulator  | insulator |
| Cl4S1W1.ICSD_16125       | insulator  | insulator |
| Cl4Se1.ICSD_15578        | insulator  | insulator |
| Cl4Si1.ICSD_62279        | insulator  | insulator |
| Cl4Sn1.ICSD_411242       | insulator  | insulator |
| Cl4Sr1Zn1.ICSD_410192    | insulator  | insulator |
| Cl4Ta1.ICSD_402406       | insulator  | insulator |
| Cl4Tc1.ICSD_26055        | insulator  | insulator |
| Cl4Th1.ICSD_26197        | insulator  | insulator |
| Cl4Th1.ICSD_6055         | insulator  | insulator |
| Cl4Ti1.ICSD_280981       | insulator  | insulator |
| Cl4Ti2.ICSD_4031         | insulator  | insulator |
| Cl4U1.ICSD_202331        | insulator  | metal     |
| Cl4V1.ICSD_250364        | insulator  | insulator |
| Cl4W1.ICSD_165263        | metal      | insulator |
| Cl4Zr1.ICSD_26049        | insulator  | insulator |
| Cl5Co1Cs3.ICSD_14087     | insulator  | insulator |
| Cl5Co1Cs3.ICSD_15245     | insulator  | insulator |
| Cl5Co1Ti3.ICSD_10137     | insulator  | insulator |
| Cl5Cs1Pb2.ICSD_249888    | insulator  | insulator |
| Cl5Cs1Pd2.ICSD_411722    | insulator  | insulator |
| Cl5Cs1Sn2.ICSD_93791     | insulator  | insulator |
| Cl5Cs3Hg1.ICSD_630       | insulator  | insulator |
| Cl5Cs3Li2.ICSD_245971    | insulator  | insulator |
| Cl5Cs3Zn1.ICSD_240876    | insulator  | insulator |
| Cl5Dy2Li1.ICSD_35763     | metal      | insulator |
| Cl5Fe1N4S4.ICSD_47103    | insulator  | insulator |
| Cl5Fe1Ti3.ICSD_10138     | insulator  | insulator |
| Cl5K1Pb2.ICSD_416431     | insulator  | insulator |
| Cl5K1Sn2.ICSD_152003     | insulator  | insulator |
| Cl5K2Mo1O1.ICSD_28215    | insulator  | insulator |
| Cl5K2N1O1Ru1.ICSD_20713  | insulator  | insulator |
| Cl5K2N1Os1.ICSD_27560    | insulator  | insulator |
| Cl5K2N1Os1.ICSD_43729    | insulator  | insulator |
| Cl5K2Sb1.ICSD_6059       | insulator  | insulator |
| Cl5K2U1.ICSD_41551       | insulator  | insulator |
| Cl5Li1Tm2.ICSD_201996    | insulator  | insulator |
| Cl5Li1Yb2.ICSD_77273     | insulator  | insulator |
| Cl5Mo1.ICSD_26500        | insulator  | insulator |
| Cl5Mo1.ICSD_84620        | insulator  | insulator |
| Cl5N3O1P2S1.ICSD_43      | insulator  | insulator |
| Cl5Nb1.ICSD_66537        | insulator  | insulator |
| Cl5Nb3O2.ICSD_91781      | insulator  | insulator |
| Cl5O2U2.ICSD_23084       | metal      | insulator |

Supplementary Table 276. Five-fold cross validated predictions for the metal/insulator classification (268/598).

| system                     | calculated | predicted |
|----------------------------|------------|-----------|
| Cl5O4Re2_ICSD_12111        | insulator  | insulator |
| Cl5O4Re2_ICSD_416429       | insulator  | insulator |
| Cl5P1_ICSD_26661           | insulator  | insulator |
| Cl5P1_ICSD_76731           | metal      | insulator |
| Cl5P4S4Ta1_ICSD_419157     | insulator  | insulator |
| Cl5Pa1_ICSD_15391          | insulator  | insulator |
| Cl5Pb1Ti3_ICSD_1262        | insulator  | insulator |
| Cl5Pb2Ti1_ICSD_417         | insulator  | insulator |
| Cl5Sb1_ICSD_250363         | insulator  | insulator |
| Cl6Co1Fe1H18N6_ICSD_32718  | metal      | insulator |
| Cl6Cr1Na3_ICSD_62035       | insulator  | insulator |
| Cl6Cs1Sb1_ICSD_155691      | insulator  | insulator |
| Cl6Cs1W1_ICSD_1242         | metal      | insulator |
| Cl6Cs2Er1Na1_ICSD_50361    | insulator  | insulator |
| Cl6Cs2Ge1_ICSD_28892       | insulator  | insulator |
| Cl6Cs2Hg1Pd1_ICSD_36616    | insulator  | insulator |
| Cl6Cs2Ho1Na1_ICSD_245366   | insulator  | insulator |
| Cl6Cs2In1Li1_ICSD_65735    | insulator  | insulator |
| Cl6Cs2Ir1_ICSD_69142       | metal      | insulator |
| Cl6Cs2Li1Sc1_ICSD_65734    | insulator  | insulator |
| Cl6Cs2Li1Y1_ICSD_65731     | insulator  | insulator |
| Cl6Cs2Mo1_ICSD_409808      | insulator  | insulator |
| Cl6Cs2Na1Tb1_ICSD_96062    | insulator  | insulator |
| Cl6Cs2Pb1_ICSD_26713       | insulator  | insulator |
| Cl6Cs2Pb1_ICSD_29033       | insulator  | insulator |
| Cl6Cs2Pt1_ICSD_26709       | insulator  | insulator |
| Cl6Cs2Pt1_ICSD_29032       | insulator  | insulator |
| Cl6Cs2Re1_ICSD_64613       | insulator  | insulator |
| Cl6Cs2Se1_ICSD_26693       | insulator  | insulator |
| Cl6Cs2Sn1_ICSD_26699       | insulator  | insulator |
| Cl6Cs2Ta1_ICSD_240711      | metal      | insulator |
| Cl6Cs2Te1_ICSD_26704       | insulator  | insulator |
| Cl6Cs2Th1_ICSD_16658       | insulator  | insulator |
| Cl6Cs2Ti1_ICSD_26690       | insulator  | insulator |
| Cl6Cs2U1_ICSD_202332       | insulator  | insulator |
| Cl6Cs2Zr1_ICSD_26695       | insulator  | insulator |
| Cl6Cs4Pb1_ICSD_35703       | insulator  | insulator |
| Cl6Er1Na3_ICSD_65145       | insulator  | insulator |
| Cl6Eu4O1_ICSD_65171        | insulator  | insulator |
| Cl6Fe1H12O6Pt1_ICSD_163595 | insulator  | insulator |
| Cl6Fe1Hf1_ICSD_39817       | insulator  | insulator |
| Cl6Fe1K3Na1_ICSD_170747    | insulator  | insulator |
| Cl6Fe1K3Na1_ICSD_23182     | metal      | insulator |
| Cl6Fe1Zr1_ICSD_39666       | insulator  | insulator |
| Cl6Ga1N1Se2_ICSD_71903     | insulator  | insulator |
| Cl6Ga1Sb1_ICSD_24786       | insulator  | insulator |
| Cl6Gd3N1_ICSD_63582        | insulator  | insulator |
| Cl6H16N5O3Rh1_ICSD_411835  | insulator  | insulator |
| Cl6H18In2N6_ICSD_281343    | insulator  | insulator |
| Cl6H22O10Sn1_ICSD_27180    | insulator  | insulator |

Supplementary Table 277. Five-fold cross validated predictions for the metal/insulator classification (269/598).

| system                   | calculated | predicted |
|--------------------------|------------|-----------|
| Cl6H4N1Sb1_ICSD_412875   | insulator  | insulator |
| Cl6H4N1W1_ICSD_412876    | insulator  | insulator |
| Cl6H5O2Sb1_ICSD_280168   | insulator  | insulator |
| Cl6H8N2Pt1_ICSD_97927    | insulator  | insulator |
| Cl6H8N2Re1_ICSD_8044     | insulator  | insulator |
| Cl6H8N2Sn1_ICSD_605      | insulator  | insulator |
| Cl6Hf1Hg3Se2_ICSD_412466 | insulator  | insulator |
| Cl6Hf1Te4_ICSD_401589    | insulator  | insulator |
| Cl6Hf1Te8_ICSD_410306    | insulator  | insulator |
| Cl6Hg3S2Zr1_ICSD_412469  | insulator  | insulator |
| Cl6Hg3Se2Zr1_ICSD_412468 | insulator  | insulator |
| Cl6Hg3Te2U1_ICSD_419437  | insulator  | insulator |
| Cl6Hg6P4Sn1_ICSD_411863  | insulator  | insulator |
| Cl6I1P1_ICSD_26594       | insulator  | insulator |
| Cl6I1Se6W1_ICSD_78789    | insulator  | insulator |
| Cl6I2_ICSD_24714         | insulator  | insulator |
| Cl6In1Na3_ICSD_154092    | insulator  | insulator |
| Cl6K2Mn1_ICSD_9679       | insulator  | insulator |
| Cl6K2Mo1_ICSD_26643      | metal      | insulator |
| Cl6K2Nb1_ICSD_245749     | metal      | insulator |
| Cl6K2Os1_ICSD_68764      | metal      | metal     |
| Cl6K2Pd1_ICSD_65037      | insulator  | insulator |
| Cl6K2Pt1_ICSD_52033      | insulator  | insulator |
| Cl6K2Pu1_ICSD_202526     | insulator  | insulator |
| Cl6K2Re1_ICSD_23769      | insulator  | insulator |
| Cl6K2Ru1_ICSD_76275      | metal      | insulator |
| Cl6K2Sn1_ICSD_1669       | insulator  | insulator |
| Cl6K2Sn1_ICSD_1670       | insulator  | insulator |
| Cl6K2Sn1_ICSD_6058       | insulator  | insulator |
| Cl6K2Ta1_ICSD_59894      | metal      | metal     |
| Cl6K2Tc1_ICSD_22096      | insulator  | metal     |
| Cl6K2Tc2_ICSD_63512      | insulator  | insulator |
| Cl6K2Ti1_ICSD_26934      | insulator  | insulator |
| Cl6K2W1_ICSD_409840      | metal      | metal     |
| Cl6K3Mn1Na1_ICSD_290109  | insulator  | insulator |
| Cl6K4Mn1_ICSD_24475      | insulator  | insulator |
| Cl6Mn1Rb2_ICSD_9347      | insulator  | insulator |
| Cl6Mo1Ti2_ICSD_408777    | insulator  | insulator |
| Cl6N1S2Sb1_ICSD_2441     | insulator  | insulator |
| Cl6N1Sc4_ICSD_201978     | metal      | metal     |
| Cl6N2O2V1_ICSD_413012    | insulator  | insulator |
| Cl6N3P3_ICSD_16136       | insulator  | insulator |
| Cl6N6S4W2_ICSD_405886    | insulator  | insulator |
| Cl6Na1Nb1_ICSD_36518     | insulator  | insulator |
| Cl6Na1Sb1_ICSD_36517     | insulator  | insulator |
| Cl6Na3Y1_ICSD_59886      | insulator  | insulator |
| Cl6Nb1Rb2_ICSD_245747    | metal      | insulator |
| Cl6Nb1Rb2_ICSD_245748    | insulator  | insulator |
| Cl6O1S8Ti4_ICSD_64624    | insulator  | insulator |
| Cl6O1Sr4_ICSD_402497     | insulator  | insulator |

Supplementary Table 278. Five-fold cross validated predictions for the metal/insulator classification (270/598).

| system                   | calculated | predicted |
|--------------------------|------------|-----------|
| Cl6O1Yb4.ICSD.202169     | insulator  | insulator |
| Cl6O3Si3.ICSD.71444      | insulator  | insulator |
| Cl6Pb1Rb2.ICSD.26712     | insulator  | insulator |
| Cl6Pd1Rb2.ICSD.33710     | insulator  | insulator |
| Cl6Pd1S2.ICSD.39434      | insulator  | insulator |
| Cl6Pt1Rb2.ICSD.26708     | insulator  | insulator |
| Cl6Pt1S2.ICSD.66013      | insulator  | insulator |
| Cl6Pt1Ti2.ICSD.26710     | insulator  | insulator |
| Cl6Rb2Se1.ICSD.26692     | insulator  | insulator |
| Cl6Rb2Sn1.ICSD.9022      | insulator  | insulator |
| Cl6Rb2Te1.ICSD.26703     | insulator  | insulator |
| Cl6Rb2Ti1.ICSD.26689     | insulator  | insulator |
| Cl6Rb2W1.ICSD.409632     | metal      | metal     |
| Cl6Rb2Zr1.ICSD.26694     | insulator  | insulator |
| Cl6Re1.ICSD.425145       | metal      | insulator |
| Cl6Re6Te16.ICSD.405813   | insulator  | insulator |
| Cl6S8W1.ICSD.65685       | insulator  | insulator |
| Cl6Se4Zr1.ICSD.412285    | insulator  | insulator |
| Cl6Sn1Ti2.ICSD.26700     | insulator  | insulator |
| Cl6Te1Ti2.ICSD.26705     | insulator  | insulator |
| Cl6Ti2W1.ICSD.409229     | metal      | insulator |
| Cl6W1.ICSD.425147        | insulator  | insulator |
| Cl6W1.ICSD.425148        | insulator  | insulator |
| Cl7Fe1Se1.ICSD.39529     | insulator  | insulator |
| Cl7Fe1Te1.ICSD.39530     | insulator  | insulator |
| Cl7Ga2In1.ICSD.418803    | insulator  | insulator |
| Cl7Ga3.ICSD.67279        | insulator  | insulator |
| Cl7Hg6P4Ti1.ICSD.411415  | insulator  | insulator |
| Cl7I1S1.ICSD.200374      | insulator  | insulator |
| Cl7In1Y2.ICSD.201429     | insulator  | insulator |
| Cl7K1Mo2O2.ICSD.410954   | insulator  | insulator |
| Cl7Mo1O1Se1.ICSD.410101  | insulator  | insulator |
| Cl7Mo2O2Ti1.ICSD.408775  | insulator  | insulator |
| Cl7N2Sb1Se3.ICSD.406352  | insulator  | insulator |
| Cl7Nb3Se5.ICSD.10066     | insulator  | insulator |
| Cl7Nb3Te1.ICSD.79213     | insulator  | insulator |
| Cl8Co1Li6.ICSD.202401    | insulator  | insulator |
| Cl8Cr1Li5.ICSD.67743     | insulator  | insulator |
| Cl8Cu1Ga2.ICSD.201414    | metal      | insulator |
| Cl8Fe1Li6.ICSD.73217     | insulator  | insulator |
| Cl8Fe1P1.ICSD.22232      | insulator  | insulator |
| Cl8Ga2Ni1.ICSD.417870    | insulator  | insulator |
| Cl8Hg2Pd1Rb2.ICSD.203187 | insulator  | insulator |
| Cl8Hg2Pd1Ti2.ICSD.203186 | insulator  | insulator |
| Cl8I1P1.ICSD.60420       | insulator  | insulator |
| Cl8I1Sb1.ICSD.26509      | insulator  | insulator |
| Cl8I3Sb1.ICSD.26402      | insulator  | insulator |
| Cl8Ir1K3Sn1.ICSD.69143   | insulator  | insulator |
| Cl8Li6V1.ICSD.100834     | insulator  | insulator |
| Cl8Mn1Na6.ICSD.1845      | insulator  | insulator |

Supplementary Table 279. Five-fold cross validated predictions for the metal/insulator classification (271/598).

| system                    | calculated | predicted |
|---------------------------|------------|-----------|
| Cl8Mn3Na2.ICSD.1846       | insulator  | insulator |
| Cl8N1Sc5.ICSD.60856       | metal      | metal     |
| Cl8N4P4.ICSD.23897        | insulator  | insulator |
| Cl8N4P4.ICSD.33711        | insulator  | insulator |
| Cl8N6Sb2.ICSD.10353       | insulator  | insulator |
| Cl8Na2Ti3.ICSD.401026     | insulator  | insulator |
| Cl8Nb3.ICSD.408645        | insulator  | insulator |
| Cl8O12Si8.ICSD.79706      | insulator  | insulator |
| Cl8O2Se2Sn1.ICSD.35477    | insulator  | insulator |
| Cl8O2Se4Te3W2.ICSD.380129 | insulator  | insulator |
| Cl8O4Si4.ICSD.71445       | insulator  | insulator |
| Cl8O9Re4.ICSD.10302       | insulator  | insulator |
| Cl8Pt1S2.ICSD.66012       | insulator  | insulator |
| Cl8Sc5.ICSD.36403         | metal      | metal     |
| Cl9Cr2Cs3.ICSD.94384      | insulator  | insulator |
| Cl9Cs1Mn4.ICSD.34750      | insulator  | insulator |
| Cl9Cs3Fe2.ICSD.22074      | insulator  | insulator |
| Cl9Cs3In2.ICSD.2491       | insulator  | insulator |
| Cl9Cs3Ru2.ICSD.201057     | insulator  | insulator |
| Cl9Cs3Sb2.ICSD.26039      | insulator  | insulator |
| Cl9Cs3Sc2.ICSD.24215      | insulator  | insulator |
| Cl9Cs3Ti2.ICSD.402407     | insulator  | insulator |
| Cl9Cs3Ti2.ICSD.26657      | insulator  | insulator |
| Cl9Cs3V2.ICSD.61234       | insulator  | insulator |
| Cl9Cs3W2.ICSD.202296      | insulator  | insulator |
| Cl9Cs3Y2.ICSD.409540      | insulator  | insulator |
| Cl9In5.ICSD.37217         | insulator  | insulator |
| Cl9In7.ICSD.71062         | insulator  | insulator |
| Cl9K3Mo2.ICSD.202298      | insulator  | insulator |
| Cl9K3W2.ICSD.16760        | insulator  | insulator |
| Cl9Mo2Rb3.ICSD.202292     | insulator  | insulator |
| Cl9Nb1Te1.ICSD.410946     | insulator  | insulator |
| Cl9Nb2S4Ti5.ICSD.417942   | insulator  | insulator |
| Cl9P1Sn1.ICSD.60094       | insulator  | insulator |
| Cl9P1Te1.ICSD.21060       | insulator  | insulator |
| Cl9P1V1.ICSD.1047         | insulator  | insulator |
| Cl9Re3.ICSD.14209         | insulator  | insulator |
| Cl9S1Sb1.ICSD.59130       | insulator  | insulator |
| Cl9S1U1.ICSD.37116        | insulator  | insulator |
| Cl9Ta1Te1.ICSD.410947     | insulator  | insulator |
| Cl9Te1W1.ICSD.410945      | insulator  | insulator |
| Co12Dy2P7.ICSD.622698     | metal      | metal     |
| Co12Er2P7.ICSD.622843     | metal      | metal     |
| Co12Ho2P7.ICSD.84086      | metal      | metal     |
| Co12Mg2P7.ICSD.94409      | metal      | metal     |
| Co12Mn5Y2.ICSD.624190     | metal      | metal     |
| Co12Nb2P7.ICSD.87195      | metal      | metal     |
| Co12Nd2P7.ICSD.624414     | metal      | metal     |
| Co12P7Sc2.ICSD.624619     | metal      | metal     |
| Co12P7Tb2.ICSD.624642     | metal      | metal     |

Supplementary Table 280. Five-fold cross validated predictions for the metal/insulator classification (272/598).

| system                    | calculated | predicted |
|---------------------------|------------|-----------|
| Co12P7Ti2.ICSD.624647     | metal      | metal     |
| Co12P7U2.ICSD.602730      | metal      | metal     |
| Co12P7Yb2.ICSD.97184      | metal      | metal     |
| Co12P7Zr2.ICSD.624676     | metal      | metal     |
| Co13La1.ICSD.623975       | metal      | metal     |
| Co15Ga2Nd2.ICSD.623133    | metal      | metal     |
| Co16Ge7Hf6.ICSD.109129    | metal      | metal     |
| Co16Ge7Nb6.ICSD.109128    | metal      | metal     |
| Co16Ge7Ta6.ICSD.109130    | metal      | metal     |
| Co16Ge7Zr6.ICSD.109131    | metal      | metal     |
| Co16Hf6Si7.ICSD.109120    | metal      | metal     |
| Co16Nb6Si7.ICSD.53047     | metal      | metal     |
| Co16Nb6Si7.ICSD.624311    | metal      | metal     |
| Co16Sc6Si7.ICSD.624967    | metal      | metal     |
| Co16Si7Ta6.ICSD.109121    | metal      | metal     |
| Co16Si7Ti6.ICSD.625090    | metal      | metal     |
| Co16Si7Zr6.ICSD.625143    | metal      | metal     |
| Co17Dy2.ICSD.108276       | metal      | metal     |
| Co17Dy2.ICSD.602645       | metal      | metal     |
| Co17Dy2.ICSD.622609       | metal      | metal     |
| Co17Dy2.ICSD.658887       | metal      | metal     |
| Co17Er2.ICSD.622718       | metal      | metal     |
| Co17Ho2.ICSD.55101        | metal      | metal     |
| Co17Ho2.ICSD.623812       | metal      | metal     |
| Co17Nd2.ICSD.102561       | metal      | metal     |
| Co17Tb2.ICSD.625360       | metal      | metal     |
| Co17Th2.ICSD.23225        | metal      | metal     |
| Co17Th2.ICSD.625454       | metal      | metal     |
| Co17Th2.ICSD.625458       | metal      | metal     |
| Co17Y2.ICSD.108324        | metal      | metal     |
| Co17Y2.ICSD.625556        | metal      | metal     |
| Co17Yb2.ICSD.625653       | metal      | metal     |
| Co1Cr1Ge1.ICSD.409451     | metal      | metal     |
| Co1Cr1O4.ICSD.23492       | insulator  | insulator |
| Co1Cr1Pt2.ICSD.102321     | metal      | metal     |
| Co1Cr1Si1.ICSD.165248     | metal      | metal     |
| Co1Cr1.ICSD.187979        | metal      | metal     |
| Co1Cr2O4.ICSD.61612       | metal      | metal     |
| Co1Cr2S4.ICSD.43039       | metal      | metal     |
| Co1Cr2S4.ICSD.622501      | metal      | metal     |
| Co1Cr2Se4.ICSD.601038     | insulator  | metal     |
| Co1Cr4H4K2O16.ICSD.154325 | insulator  | insulator |
| Co1Cs1F3.ICSD.15091       | insulator  | insulator |
| Co1Cs1K2O2.ICSD.74889     | insulator  | insulator |
| Co1Cs2F6K1.ICSD.6037      | metal      | insulator |
| Co1Cs2I4.ICSD.87897       | insulator  | insulator |
| Co1Cs2O3.ICSD.6154        | insulator  | insulator |
| Co1Cs2O4Si1.ICSD.93878    | insulator  | insulator |
| Co1Cs2S2.ICSD.67389       | insulator  | insulator |
| Co1Cu12La1.ICSD.55509     | metal      | metal     |

Supplementary Table 281. Five-fold cross validated predictions for the metal/insulator classification (273/598).

| system                     | calculated | predicted |
|----------------------------|------------|-----------|
| Co1Cu1O2.ICSD.27803        | insulator  | metal     |
| Co1Cu1O7P2.ICSD.75379      | insulator  | insulator |
| Co1Cu2Ge1S4.ICSD.622541    | insulator  | insulator |
| Co1Cu2O3.ICSD.33996        | metal      | metal     |
| Co1Cu2S4Si1.ICSD.99292     | insulator  | insulator |
| Co1Cu2S4Sn1.ICSD.99294     | insulator  | insulator |
| Co1Cu2Se4Sn1.ICSD.99296    | metal      | metal     |
| Co1Cu2Sn1.ICSD.151207      | metal      | metal     |
| Co1Dy1Ga1.ICSD.163702      | metal      | metal     |
| Co1Dy1Ga5.ICSD.622659      | metal      | metal     |
| Co1Dy1Ge1.ICSD.601865      | metal      | metal     |
| Co1Dy1Ge2.ICSD.622671      | metal      | metal     |
| Co1Dy1In5.ICSD.622689      | metal      | metal     |
| Co1Dy1Si1.ICSD.88272       | insulator  | metal     |
| Co1Dy1Si2.ICSD.622703      | metal      | metal     |
| Co1Dy1Sn1.ICSD.106459      | metal      | insulator |
| Co1Dy1Sn1.ICSD.54584       | insulator  | insulator |
| Co1Dy1Sn2.ICSD.240097      | metal      | metal     |
| Co1Dy2Ga8.ICSD.622660      | metal      | metal     |
| Co1Dy2In8.ICSD.622690      | metal      | metal     |
| Co1Dy2Si2.ICSD.99213       | metal      | metal     |
| Co1Dy3.ICSD.106901         | metal      | metal     |
| Co1Dy6Te2.ICSD.247432      | metal      | metal     |
| Co1Dy8Ga3.ICSD.622663      | metal      | metal     |
| Co1Dy8In3.ICSD.189215      | metal      | metal     |
| Co1Er1Ga1.ICSD.102373      | metal      | metal     |
| Co1Er1Ga5.ICSD.622798      | metal      | metal     |
| Co1Er1Ge1.ICSD.601878      | metal      | metal     |
| Co1Er1Ge2.ICSD.622811      | metal      | metal     |
| Co1Er1In5.ICSD.153908      | metal      | metal     |
| Co1Er1Si1.ICSD.601847      | metal      | metal     |
| Co1Er1Si2.ICSD.73620       | metal      | metal     |
| Co1Er1Sn1.ICSD.106463      | insulator  | metal     |
| Co1Er1Sn2.ICSD.240099      | metal      | metal     |
| Co1Er2Ga8.ICSD.169772      | metal      | metal     |
| Co1Er2Ge2.ICSD.622815      | metal      | metal     |
| Co1Er2In8.ICSD.622827      | metal      | metal     |
| Co1Er2Si2.ICSD.99214       | metal      | metal     |
| Co1Er3Si3.ICSD.152534      | metal      | metal     |
| Co1Er3.ICSD.622736         | metal      | metal     |
| Co1Er6Te2.ICSD.247434      | metal      | metal     |
| Co1Er7I12.ICSD.424430      | insulator  | metal     |
| Co1Er8Ga3.ICSD.622802      | metal      | metal     |
| Co1Er8In3.ICSD.290605      | metal      | metal     |
| Co1Eu1Ge3.ICSD.52951       | metal      | metal     |
| Co1F11Na1Zr2.ICSD.81221    | insulator  | insulator |
| Co1F12O4S2Sb2.ICSD.411789  | insulator  | insulator |
| Co1F1H4Na1O6S1.ICSD.169111 | metal      | insulator |
| Co1F1Li1O4S1.ICSD.167202   | metal      | insulator |
| Co1F1Na1O4S1.ICSD.290052   | insulator  | insulator |

Supplementary Table 282. Five-fold cross validated predictions for the metal/insulator classification (274/598).

| system                   | calculated | predicted |
|--------------------------|------------|-----------|
| Co1F2_ICSD_26604         | insulator  | insulator |
| Co1F3K1_ICSD_15425       | metal      | insulator |
| Co1F3Na1_ICSD_4404       | insulator  | insulator |
| Co1F3_ICSD_16672         | insulator  | metal     |
| Co1F3_ICSD_29133         | metal      | insulator |
| Co1F3_ICSD_77618         | metal      | insulator |
| Co1F4K2_ICSD_33522       | insulator  | insulator |
| Co1F4Li1_ICSD_202919     | insulator  | insulator |
| Co1F4Rb2_ICSD_69683      | insulator  | insulator |
| Co1F6H12O6Si1_ICSD_2900  | insulator  | insulator |
| Co1F6H12O6Sn1_ICSD_75984 | insulator  | insulator |
| Co1F6H12O6Sn2_ICSD_27799 | insulator  | insulator |
| Co1F6K1Rb2_ICSD_42147    | insulator  | insulator |
| Co1F6Li1Sr1_ICSD_41177   | insulator  | insulator |
| Co1F6Na1Rb2_ICSD_42148   | insulator  | insulator |
| Co1F6Pt1_ICSD_37447      | insulator  | insulator |
| Co1F6Rb2_ICSD_9701       | insulator  | insulator |
| Co1F6Sn1_ICSD_25014      | insulator  | insulator |
| Co1F6Zr1_ICSD_83724      | insulator  | metal     |
| Co1Fe15_ICSD_155846      | metal      | metal     |
| Co1Fe1Ga1Mn1_ICSD_186830 | metal      | metal     |
| Co1Fe1Ge1Mn1_ICSD_186831 | metal      | metal     |
| Co1Fe1La3S7_ICSD_603954  | insulator  | insulator |
| Co1Fe1P1_ICSD_622955     | metal      | metal     |
| Co1Fe1Si1_ICSD_165250    | metal      | metal     |
| Co1Fe1_ICSD_187982       | metal      | metal     |
| Co1Fe2Ga1_ICSD_102385    | metal      | metal     |
| Co1Fe2Ge1_ICSD_52954     | metal      | metal     |
| Co1Fe2O4_ICSD_166200     | metal      | metal     |
| Co1Fe2O4_ICSD_184063     | metal      | metal     |
| Co1Fe2Se4_ICSD_622979    | metal      | metal     |
| Co1Fe3_ICSD_155843       | metal      | metal     |
| Co1Fe7_ICSD_155845       | metal      | metal     |
| Co1Ga12U4_ICSD_156307    | metal      | metal     |
| Co1Ga1Hf1_ICSD_623085    | metal      | metal     |
| Co1Ga1Ho1_ICSD_623088    | metal      | metal     |
| Co1Ga1Mn1V1_ICSD_183629  | metal      | metal     |
| Co1Ga1Mn2_ICSD_160704    | metal      | metal     |
| Co1Ga1Ti2_ICSD_185663    | metal      | metal     |
| Co1Ga1U1_ICSD_164348     | metal      | metal     |
| Co1Ga1U1_ICSD_623224     | metal      | metal     |
| Co1Ga1Zr1_ICSD_623254    | metal      | metal     |
| Co1Ga1_ICSD_657494       | metal      | metal     |
| Co1Ga2Gd1_ICSD_102429    | metal      | metal     |
| Co1Ga2Hf6_ICSD_623077    | metal      | metal     |
| Co1Ga2Mn1_ICSD_102437    | metal      | metal     |
| Co1Ga2S4_ICSD_623159     | insulator  | insulator |
| Co1Ga2Zr6_ICSD_20876     | metal      | metal     |
| Co1Ga3Ho8_ICSD_623092    | metal      | metal     |
| Co1Ga3Tb8_ICSD_623199    | metal      | metal     |

Supplementary Table 283. Five-fold cross validated predictions for the metal/insulator classification (275/598).

| system                 | calculated | predicted |
|------------------------|------------|-----------|
| Co1Ga3_ICSD_102425     | metal      | metal     |
| Co1Ga4Hf1_ICSD_623081  | metal      | metal     |
| Co1Ga4Th1_ICSD_55670   | metal      | metal     |
| Co1Ga5Gd1_ICSD_623064  | metal      | metal     |
| Co1Ga5Ho1_ICSD_655672  | metal      | metal     |
| Co1Ga5Lu1_ICSD_623110  | metal      | metal     |
| Co1Ga5Tb1_ICSD_623195  | metal      | metal     |
| Co1Ga5Tm1_ICSD_623215  | metal      | metal     |
| Co1Ga5U1_ICSD_106469   | metal      | metal     |
| Co1Ga5Y1_ICSD_623236   | metal      | metal     |
| Co1Ga5Yb1_ICSD_162956  | metal      | metal     |
| Co1Ga8Ho2_ICSD_42426   | metal      | metal     |
| Co1Ga8Lu2_ICSD_623111  | metal      | metal     |
| Co1Ga8Tb2_ICSD_623196  | metal      | metal     |
| Co1Ga8Tm2_ICSD_169773  | metal      | metal     |
| Co1Ga8Y2_ICSD_623237   | metal      | metal     |
| Co1Gd1Ge2_ICSD_623352  | metal      | metal     |
| Co1Gd1O3_ICSD_45153    | insulator  | metal     |
| Co1Gd1Si2_ICSD_623396  | metal      | metal     |
| Co1Gd1Si3_ICSD_658380  | metal      | metal     |
| Co1Gd7I12_ICSD_245279  | metal      | insulator |
| Co1Ge1Hf1_ICSD_623439  | metal      | metal     |
| Co1Ge1Ho1_ICSD_601867  | metal      | metal     |
| Co1Ge1La1_ICSD_85860   | metal      | metal     |
| Co1Ge1Mg1_ICSD_418853  | metal      | metal     |
| Co1Ge1Mn1_ICSD_52968   | metal      | metal     |
| Co1Ge1Mn1_ICSD_623495  | metal      | metal     |
| Co1Ge1Mn2_ICSD_160707  | metal      | metal     |
| Co1Ge1Na2O4_ICSD_23425 | insulator  | insulator |
| Co1Ge1Nb1_ICSD_623540  | metal      | metal     |
| Co1Ge1Nd1_ICSD_85861   | metal      | metal     |
| Co1Ge1O3_ICSD_26814    | insulator  | insulator |
| Co1Ge1Pr1_ICSD_623566  | metal      | metal     |
| Co1Ge1Sc1_ICSD_623584  | metal      | metal     |
| Co1Ge1Ta1_ICSD_623611  | metal      | metal     |
| Co1Ge1Tb1_ICSD_52986   | metal      | metal     |
| Co1Ge1Te1_ICSD_160511  | insulator  | metal     |
| Co1Ge1Ti1_ICSD_42943   | metal      | metal     |
| Co1Ge1Ti1_ICSD_623629  | metal      | metal     |
| Co1Ge1Ti2_ICSD_184992  | metal      | metal     |
| Co1Ge1V1_ICSD_623660   | metal      | metal     |
| Co1Ge1Y1_ICSD_623669   | metal      | metal     |
| Co1Ge1Zr1_ICSD_623685  | metal      | metal     |
| Co1Ge1_ICSD_43677      | metal      | metal     |
| Co1Ge1_ICSD_623422     | metal      | metal     |
| Co1Ge1_ICSD_623423     | metal      | metal     |
| Co1Ge2Ho1_ICSD_623450  | metal      | metal     |
| Co1Ge2Ho2_ICSD_623457  | metal      | metal     |
| Co1Ge2La1_ICSD_623464  | metal      | metal     |
| Co1Ge2Nd1_ICSD_623543  | metal      | metal     |

Supplementary Table 284. Five-fold cross validated predictions for the metal/insulator classification (276/598).

| system                    | calculated | predicted |
|---------------------------|------------|-----------|
| Co1Ge2O7Sr2.ICSD_262399   | insulator  | insulator |
| Co1Ge2Pr1.ICSD_623562     | metal      | metal     |
| Co1Ge2Tb1.ICSD_623619     | metal      | metal     |
| Co1Ge2Tb2.ICSD_52987      | metal      | metal     |
| Co1Ge2Y1.ICSD_623665      | metal      | metal     |
| Co1Ge2Yb1.ICSD_623674     | metal      | metal     |
| Co1Ge2.ICSD_52964         | metal      | metal     |
| Co1Ge3La1.ICSD_42373      | metal      | metal     |
| Co1Ge3Nd1.ICSD_50359      | metal      | metal     |
| Co1Ge3Nd1.ICSD_623542     | metal      | metal     |
| Co1Ge3Pr1.ICSD_161875     | metal      | metal     |
| Co1H10O16P4.ICSD_31310    | metal      | insulator |
| Co1H1O2.ICSD_22285        | insulator  | insulator |
| Co1H1O2.ICSD_56288        | insulator  | insulator |
| Co1H1O5P1Zn1.ICSD_416823  | insulator  | insulator |
| Co1H2Mo1O7Se1.ICSD_249955 | insulator  | insulator |
| Co1H2O2.ICSD_88940        | insulator  | insulator |
| Co1H2O5S1.ICSD_71346      | insulator  | insulator |
| Co1H2O5Se1.ICSD_66747     | insulator  | insulator |
| Co1H4K2O10Se2.ICSD_98686  | insulator  | insulator |
| Co1H4Th1.ICSD_261442      | metal      | metal     |
| Co1H6K2O8P2.ICSD_59884    | insulator  | insulator |
| Co1H6N1O5P1.ICSD_280044   | insulator  | insulator |
| Co1H8I2O10.ICSD_408060    | insulator  | insulator |
| Co1H8O12Re2.ICSD_402964   | metal      | insulator |
| Co1H8O14P2V2.ICSD_281336  | insulator  | insulator |
| Co1H8O16P4Ti2.ICSD_416650 | metal      | insulator |
| Co1Hf1P1.ICSD_623786      | metal      | metal     |
| Co1Hf1Sb1.ICSD_108294     | metal      | metal     |
| Co1Hf1Si1.ICSD_623795     | metal      | metal     |
| Co1Hf1Sn1.ICSD_107472     | metal      | metal     |
| Co1Hf1Sn1.ICSD_623801     | metal      | metal     |
| Co1Hf1.ICSD_623772        | metal      | metal     |
| Co1Hf2P1.ICSD_84827       | metal      | metal     |
| Co1Hf2.ICSD_623763        | metal      | metal     |
| Co1Hf4P1.ICSD_623784      | metal      | metal     |
| Co1Hf9Mo4.ICSD_623782     | metal      | metal     |
| Co1Hf9Re4.ICSD_623788     | metal      | metal     |
| Co1Hf9W4.ICSD_623810      | metal      | metal     |
| Co1Ho1In5.ICSD_102492     | metal      | metal     |
| Co1Ho1Si1.ICSD_107115     | metal      | metal     |
| Co1Ho1Si2.ICSD_67010      | metal      | metal     |
| Co1Ho1Sn1.ICSD_106978     | metal      | insulator |
| Co1Ho1Sn1.ICSD_108173     | insulator  | metal     |
| Co1Ho2In8.ICSD_623870     | metal      | metal     |
| Co1Ho3.ICSD_102484        | metal      | metal     |
| Co1Ho6Te2.ICSD_247433     | metal      | metal     |
| Co1Ho8In3.ICSD_189216     | metal      | metal     |
| Co1I10Y6.ICSD_424841      | insulator  | insulator |
| Co1I12Sc7.ICSD_63303      | insulator  | insulator |

Supplementary Table 285. Five-fold cross validated predictions for the metal/insulator classification (277/598).

| system                   | calculated | predicted |
|--------------------------|------------|-----------|
| Co1I12Tb7.ICSD_424442    | insulator  | metal     |
| Co1I2.ICSD_52368         | insulator  | insulator |
| Co1I4Rb2.ICSD_1029       | insulator  | insulator |
| Co1In1Mn2.ICSD_160705    | metal      | metal     |
| Co1In1Ti2.ICSD_185664    | metal      | metal     |
| Co1In2S4.ICSD_623937     | insulator  | insulator |
| Co1In2Se4.ICSD_658918    | insulator  | insulator |
| Co1In3.ICSD_102500       | metal      | metal     |
| Co1In3.ICSD_623918       | metal      | metal     |
| Co1In5La1.ICSD_150264    | metal      | metal     |
| Co1In5Nd1.ICSD_623923    | metal      | metal     |
| Co1In5Pr1.ICSD_246914    | metal      | metal     |
| Co1In5Tb1.ICSD_623944    | metal      | metal     |
| Co1In5Tm1.ICSD_106969    | metal      | metal     |
| Co1In5Y1.ICSD_623947     | metal      | metal     |
| Co1In5Yb1.ICSD_163767    | metal      | metal     |
| Co1In5Yb1.ICSD_412910    | metal      | metal     |
| Co1In8Pr2.ICSD_623926    | metal      | metal     |
| Co1In8Tm2.ICSD_106970    | metal      | metal     |
| Co1In8Y2.ICSD_623948     | metal      | metal     |
| Co1K1O2.ICSD_15770       | insulator  | insulator |
| Co1K1O2.ICSD_4199        | insulator  | insulator |
| Co1K2N6O12Pb1.ICSD_23115 | metal      | metal     |
| Co1K2O12P4.ICSD_2069     | insulator  | insulator |
| Co1K2O2.ICSD_74940       | insulator  | insulator |
| Co1K2O6Se2.ICSD_71536    | metal      | insulator |
| Co1K2S2.ICSD_623958      | insulator  | insulator |
| Co1K2Se2.ICSD_67390      | insulator  | insulator |
| Co1K3N6O12.ICSD_26746    | insulator  | metal     |
| Co1K3O2.ICSD_73212       | insulator  | insulator |
| Co1K6S4.ICSD_68603       | insulator  | insulator |
| Co1K6Se4.ICSD_68605      | insulator  | insulator |
| Co1La1O1P1.ICSD_80203    | metal      | metal     |
| Co1La1O3.ICSD_161383     | metal      | metal     |
| Co1La1O3.ICSD_189375     | metal      | metal     |
| Co1La1O3.ICSD_28921      | metal      | metal     |
| Co1La1Sb2.ICSD_657919    | metal      | metal     |
| Co1La1Sb2.ICSD_657990    | metal      | metal     |
| Co1La1Sb3.ICSD_419540    | metal      | metal     |
| Co1La1Si1.ICSD_658265    | metal      | metal     |
| Co1La1Si3.ICSD_624028    | metal      | metal     |
| Co1La3O6S3W1.ICSD_380405 | insulator  | insulator |
| Co1La3.ICSD_150531       | metal      | metal     |
| Co1La4Mg1.ICSD_416990    | metal      | metal     |
| Co1La4S7.ICSD_624013     | insulator  | insulator |
| Co1Li1N2Sr2.ICSD_72387   | insulator  | insulator |
| Co1Li1O2.ICSD_161384     | insulator  | insulator |
| Co1Li1O2.ICSD_180989     | metal      | insulator |
| Co1Li1O2.ICSD_182442     | insulator  | metal     |
| Co1Li1O4P1.ICSD_247497   | insulator  | insulator |

Supplementary Table 286. Five-fold cross validated predictions for the metal/insulator classification (278/598).

| system                    | calculated | predicted |
|---------------------------|------------|-----------|
| Co1Li2O8W2.ICSD_92852     | insulator  | insulator |
| Co1Li6O4.ICSD_62688       | insulator  | insulator |
| Co1Li8O6.ICSD_21026       | insulator  | insulator |
| Co1Mg1.ICSD_106482        | metal      | metal     |
| Co1Mn1O3.ICSD_31854       | insulator  | insulator |
| Co1Mn1P1.ICSD_16483       | metal      | metal     |
| Co1Mn1P1.ICSD_41556       | metal      | metal     |
| Co1Mn1Sb1.ICSD_157563     | metal      | metal     |
| Co1Mn1Sb1.ICSD_624133     | metal      | metal     |
| Co1Mn1Si1.ICSD_41917      | metal      | metal     |
| Co1Mn1Si1.ICSD_53006      | metal      | metal     |
| Co1Mn1.ICSD_187981        | metal      | metal     |
| Co1Mn2Sb1.ICSD_160709     | metal      | metal     |
| Co1Mn2Si1.ICSD_160706     | metal      | metal     |
| Co1Mn2Sn1.ICSD_160708     | metal      | metal     |
| Co1Mn2Sn1.ICSD_183043     | metal      | metal     |
| Co1Mo1O4.ICSD_23808       | insulator  | insulator |
| Co1Mo1O4.ICSD_281235      | insulator  | insulator |
| Co1Mo1O6Sr2.ICSD_153543   | metal      | metal     |
| Co1Mo1O6Sr2.ICSD_153544   | insulator  | insulator |
| Co1Mo1O6Te1.ICSD_93795    | insulator  | insulator |
| Co1Mo1P1.ICSD_2421        | metal      | metal     |
| Co1Mo1P2.ICSD_624219      | metal      | metal     |
| Co1Mo1.ICSD_187980        | metal      | metal     |
| Co1Mo2S4.ICSD_2018        | insulator  | metal     |
| Co1Mo2S4.ICSD_26173       | metal      | metal     |
| Co1Mo4Zr9.ICSD_624247     | metal      | metal     |
| Co1N1.ICSD_184377         | metal      | metal     |
| Co1N1.ICSD_79936          | metal      | metal     |
| Co1N2O6.ICSD_412004       | insulator  | insulator |
| Co1N3.ICSD_162105         | metal      | metal     |
| Co1N3.ICSD_162106         | metal      | metal     |
| Co1N6Na3O12.ICSD_280730   | insulator  | insulator |
| Co1N6Na3O12.ICSD_39573    | insulator  | insulator |
| Co1N6O12Pb1Rb2.ICSD_23116 | metal      | metal     |
| Co1Na1O2.ICSD_6152        | insulator  | insulator |
| Co1Na1O4P1.ICSD_280175    | insulator  | insulator |
| Co1Na1O4P1.ICSD_82752     | insulator  | insulator |
| Co1Na2O14P4Zr1.ICSD_65704 | insulator  | insulator |
| Co1Na2S2.ICSD_67386       | insulator  | insulator |
| Co1Na3O2.ICSD_73211       | insulator  | insulator |
| Co1Na4O3.ICSD_10473       | insulator  | insulator |
| Co1Na4O3.ICSD_10501       | insulator  | insulator |
| Co1Na5O2S1.ICSD_412978    | insulator  | insulator |
| Co1Na6S4.ICSD_624260      | insulator  | insulator |
| Co1Na6Se4.ICSD_68604      | insulator  | insulator |
| Co1Nb1O4.ICSD_16377       | insulator  | insulator |
| Co1Nb1P1.ICSD_49727       | metal      | metal     |
| Co1Nb1Sb1.ICSD_107129     | metal      | metal     |
| Co1Nb1Si1.ICSD_624322     | metal      | metal     |

Supplementary Table 287. Five-fold cross validated predictions for the metal/insulator classification (279/598).

| system                 | calculated | predicted |
|------------------------|------------|-----------|
| Co1Nb1Sn1.ICSD_102552  | metal      | metal     |
| Co1Nb1Sn1.ICSD_102553  | metal      | metal     |
| Co1Nb1Te2.ICSD_73739   | metal      | metal     |
| Co1Nb1.ICSD_187977     | metal      | metal     |
| Co1Nb2S4.ICSD_624299   | metal      | metal     |
| Co1Nb3S6.ICSD_53016    | metal      | metal     |
| Co1Nb4P1.ICSD_9967     | metal      | metal     |
| Co1Nb4S8.ICSD_624300   | metal      | metal     |
| Co1Nb4Se8.ICSD_624305  | metal      | metal     |
| Co1Nb4Si1.ICSD_43233   | metal      | metal     |
| Co1Nd1O3.ICSD_28923    | metal      | metal     |
| Co1Nd1O3.ICSD_82078    | metal      | metal     |
| Co1Nd1P1.ICSD_624416   | metal      | metal     |
| Co1Nd1Sb2.ICSD_657922  | metal      | metal     |
| Co1Nd1Sb2.ICSD_657993  | metal      | metal     |
| Co1Nd1Sb3.ICSD_419541  | metal      | metal     |
| Co1Nd1Si1.ICSD_80513   | metal      | metal     |
| Co1Nd1Si2.ICSD_83743   | metal      | metal     |
| Co1Nd1Si2.ICSD_83744   | metal      | metal     |
| Co1Nd1Si3.ICSD_624433  | metal      | metal     |
| Co1Ni1O12P4.ICSD_37136 | insulator  | insulator |
| Co1Ni1Si1.ICSD_165256  | metal      | metal     |
| Co1Ni1Sn1.ICSD_102582  | metal      | metal     |
| Co1Ni1.ICSD_187983     | metal      | metal     |
| Co1Ni2S4.ICSD_624469   | metal      | metal     |
| Co1O10P2V2.ICSD_419532 | insulator  | insulator |
| Co1O1.ICSD_174027      | metal      | metal     |
| Co1O1.ICSD_29082       | insulator  | metal     |
| Co1O1.ICSD_29226       | metal      | metal     |
| Co1O1.ICSD_43458       | insulator  | insulator |
| Co1O2Pd1.ICSD_31917    | metal      | metal     |
| Co1O2Pt1.ICSD_31916    | metal      | metal     |
| Co1O2Rb3.ICSD_94437    | insulator  | insulator |
| Co1O2.ICSD_88722       | insulator  | insulator |
| Co1O2.ICSD_95440       | insulator  | insulator |
| Co1O3Pr1.ICSD_28922    | metal      | metal     |
| Co1O3Pr1.ICSD_88738    | metal      | metal     |
| Co1O3Se1.ICSD_496      | insulator  | insulator |
| Co1O3Si1.ICSD_17054    | insulator  | insulator |
| Co1O3Sr1.ICSD_108896   | metal      | insulator |
| Co1O3Sr1.ICSD_184078   | metal      | metal     |
| Co1O3Te1.ICSD_500      | insulator  | insulator |
| Co1O3Ti1.ICSD_16548    | insulator  | insulator |
| Co1O4P1.ICSD_246224    | insulator  | insulator |
| Co1O4Re1.ICSD_72872    | insulator  | metal     |
| Co1O4Rh2.ICSD_109301   | insulator  | metal     |
| Co1O4S1.ICSD_16985     | insulator  | insulator |
| Co1O4S1.ICSD_18176     | insulator  | insulator |
| Co1O4S1.ICSD_33736     | insulator  | insulator |
| Co1O4Sb2.ICSD_262626   | insulator  | insulator |

Supplementary Table 288. Five-fold cross validated predictions for the metal/insulator classification (280/598).

| system                  | calculated | predicted |
|-------------------------|------------|-----------|
| Co1O4Se1.ICSD_109072    | insulator  | insulator |
| Co1O4Sr2.ICSD_246483    | metal      | metal     |
| Co1O4U1.ICSD_26939      | insulator  | insulator |
| Co1O4W1.ICSD_15851      | insulator  | insulator |
| Co1O6Os1Sr2.ICSD_236435 | metal      | metal     |
| Co1O6Pb2Te1.ICSD_169192 | metal      | insulator |
| Co1O6Pb2Te1.ICSD_169196 | metal      | metal     |
| Co1O6Pb2Te1.ICSD_405782 | insulator  | metal     |
| Co1O6Pb2W1.ICSD_77912   | insulator  | insulator |
| Co1O6Pt3.ICSD_35338     | insulator  | insulator |
| Co1O6Re1Sr2.ICSD_173488 | metal      | metal     |
| Co1O6Sb2.ICSD_203094    | insulator  | insulator |
| Co1O6Sr2W1.ICSD_245470  | insulator  | metal     |
| Co1O6Sr2W1.ICSD_28598   | metal      | insulator |
| Co1O6Sr3Zn1.ICSD_189230 | insulator  | insulator |
| Co1O6Ta2.ICSD_166673    | insulator  | insulator |
| Co1O6U2.ICSD_166250     | insulator  | insulator |
| Co1O6U2.ICSD_28127      | insulator  | insulator |
| Co1O6V2.ICSD_188911     | insulator  | insulator |
| Co1O6V2.ICSD_263002     | insulator  | insulator |
| Co1O6V2.ICSD_46003      | insulator  | insulator |
| Co1O8Re2.ICSD_51015     | insulator  | insulator |
| Co1P1Pd1.ICSD_624599    | metal      | metal     |
| Co1P1Pr1.ICSD_624605    | metal      | metal     |
| Co1P1Sc1.ICSD_624621    | metal      | metal     |
| Co1P1Se1.ICSD_624624    | insulator  | insulator |
| Co1P1Sm1.ICSD_624632    | metal      | metal     |
| Co1P1Ta1.ICSD_624636    | metal      | metal     |
| Co1P1Ta4.ICSD_624637    | metal      | metal     |
| Co1P1Ti1.ICSD_624646    | metal      | metal     |
| Co1P1V1.ICSD_624659     | metal      | metal     |
| Co1P1W1.ICSD_624662     | metal      | metal     |
| Co1P1Zr1.ICSD_49726     | metal      | metal     |
| Co1P1Zr2.ICSD_84825     | metal      | metal     |
| Co1P1Zr4.ICSD_624677    | metal      | metal     |
| Co1P1.ICSD_43401        | metal      | metal     |
| Co1P2U1.ICSD_656838     | metal      | metal     |
| Co1P2W1.ICSD_624660     | metal      | metal     |
| Co1P2.ICSD_38316        | metal      | insulator |
| Co1P3Si3.ICSD_82221     | insulator  | insulator |
| Co1P3.ICSD_624594       | metal      | metal     |
| Co1Pd2Se2.ICSD_416513   | metal      | metal     |
| Co1Pd2Te2.ICSD_416514   | metal      | metal     |
| Co1Pr1Sb2.ICSD_657921   | metal      | metal     |
| Co1Pr1Si1.ICSD_624757   | metal      | metal     |
| Co1Pr1Si1.ICSD_658267   | metal      | metal     |
| Co1Pt1.ICSD_102620      | metal      | metal     |
| Co1Pt1.ICSD_624775      | metal      | metal     |
| Co1Pt1.ICSD_624781      | metal      | metal     |
| Co1Pt3.ICSD_107048      | metal      | metal     |

Supplementary Table 289. Five-fold cross validated predictions for the metal/insulator classification (281/598).

| system                | calculated | predicted |
|-----------------------|------------|-----------|
| Co1Rb2S2.ICSD_67388   | insulator  | insulator |
| Co1Rb2Se2.ICSD_67391  | insulator  | insulator |
| Co1Rh2S4.ICSD_624812  | insulator  | metal     |
| Co1Rh2Sn1.ICSD_624817 | metal      | metal     |
| Co1S17U8.ICSD_624880  | insulator  | insulator |
| Co1S1Sb1.ICSD_624862  | insulator  | insulator |
| Co1S1Sb1.ICSD_624864  | insulator  | insulator |
| Co1S1.ICSD_624831     | insulator  | metal     |
| Co1S2.ICSD_624852     | metal      | insulator |
| Co1S4V2.ICSD_624884   | metal      | metal     |
| Co1S5U2.ICSD_624883   | insulator  | insulator |
| Co1Sb1Ta1.ICSD_107128 | metal      | metal     |
| Co1Sb1Ti1.ICSD_624919 | insulator  | metal     |
| Co1Sb1V1.ICSD_107117  | metal      | metal     |
| Co1Sb1Zr1.ICSD_108317 | metal      | metal     |
| Co1Sb1.ICSD_624893    | metal      | metal     |
| Co1Sb1.ICSD_624909    | metal      | metal     |
| Co1Sb2.ICSD_161492    | metal      | metal     |
| Co1Sb2.ICSD_43500     | metal      | metal     |
| Co1Sb2.ICSD_624899    | metal      | metal     |
| Co1Sb2.ICSD_76120     | metal      | metal     |
| Co1Sb3Zr5.ICSD_624928 | metal      | metal     |
| Co1Sb3.ICSD_34048     | metal      | metal     |
| Co1Sc1Si1.ICSD_165245 | metal      | metal     |
| Co1Sc1Sn1.ICSD_624977 | metal      | metal     |
| Co1Sc1.ICSD_102642    | metal      | metal     |
| Co1Sc2Si2.ICSD_41746  | metal      | metal     |
| Co1Sc2Si2.ICSD_624952 | metal      | metal     |
| Co1Sc2.ICSD_102643    | metal      | metal     |
| Co1Sc3.ICSD_2407      | metal      | metal     |
| Co1Se17U8.ICSD_601673 | metal      | metal     |
| Co1Se1.ICSD_53959     | metal      | metal     |
| Co1Se1.ICSD_56136     | metal      | metal     |
| Co1Se2.ICSD_246908    | metal      | metal     |
| Co1Se2.ICSD_42540     | metal      | metal     |
| Co1Se2.ICSD_624982    | metal      | metal     |
| Co1Se4Ti2.ICSD_625002 | metal      | metal     |
| Co1Si1Sm1.ICSD_625037 | metal      | metal     |
| Co1Si1Ta1.ICSD_625050 | metal      | metal     |
| Co1Si1Tb1.ICSD_80516  | metal      | metal     |
| Co1Si1Tb1.ICSD_88213  | metal      | metal     |
| Co1Si1Ti1.ICSD_42735  | metal      | metal     |
| Co1Si1Ti1.ICSD_53079  | metal      | metal     |
| Co1Si1Ti2.ICSD_188945 | metal      | metal     |
| Co1Si1U1.ICSD_50081   | metal      | metal     |
| Co1Si1V1.ICSD_409847  | metal      | metal     |
| Co1Si1Zr1.ICSD_625144 | metal      | metal     |
| Co1Si1.ICSD_155928    | metal      | metal     |
| Co1Si1.ICSD_625027    | metal      | metal     |
| Co1Si2Sm1.ICSD_625036 | metal      | metal     |

Supplementary Table 290. Five-fold cross validated predictions for the metal/insulator classification (282/598).

| system                | calculated | predicted |
|-----------------------|------------|-----------|
| Co1Si2Tb1_ICSD_99115  | metal      | metal     |
| Co1Si2Tm1_ICSD_625095 | metal      | metal     |
| Co1Si2Y1_ICSD_625129  | metal      | metal     |
| Co1Si2Zr2_ICSD_653752 | metal      | metal     |
| Co1Si2_ICSD_625030    | metal      | metal     |
| Co1Si3Sm1_ICSD_625038 | metal      | metal     |
| Co1Si3Tb1_ICSD_625062 | metal      | metal     |
| Co1Si3Th1_ICSD_625074 | metal      | metal     |
| Co1Sn1Tb1_ICSD_106977 | metal      | metal     |
| Co1Sn1Th1_ICSD_61484  | metal      | metal     |
| Co1Sn1Ti1_ICSD_657174 | metal      | metal     |
| Co1Sn1Tm1_ICSD_625294 | metal      | metal     |
| Co1Sn1U1_ICSD_601799  | metal      | metal     |
| Co1Sn1U1_ICSD_625297  | metal      | metal     |
| Co1Sn1V1_ICSD_185079  | metal      | metal     |
| Co1Sn1Y1_ICSD_601850  | metal      | metal     |
| Co1Sn1Zr1_ICSD_102686 | metal      | metal     |
| Co1Sn1_ICSD_161110    | metal      | metal     |
| Co1Sn1_ICSD_161113    | metal      | metal     |
| Co1Sn1_ICSD_161115    | metal      | metal     |
| Co1Sn1_ICSD_161117    | metal      | metal     |
| Co1Sn1_ICSD_161118    | metal      | metal     |
| Co1Sn1_ICSD_55564     | metal      | metal     |
| Co1Sn1_ICSD_625264    | metal      | metal     |
| Co1Sn2Tb1_ICSD_240096 | metal      | metal     |
| Co1Sn2_ICSD_102672    | metal      | metal     |
| Co1Sn2_ICSD_247484    | metal      | metal     |
| Co1Sn2_ICSD_625263    | metal      | metal     |
| Co1Sn3_ICSD_166871    | metal      | metal     |
| Co1Ta1Te2_ICSD_73738  | metal      | metal     |
| Co1Ta1_ICSD_187978    | metal      | metal     |
| Co1Ta2_ICSD_625322    | metal      | metal     |
| Co1Ta4Te4_ICSD_659269 | metal      | metal     |
| Co1Tb3_ICSD_625381    | metal      | metal     |
| Co1Tb6Te2_ICSD_247431 | metal      | metal     |
| Co1Te1_ICSD_625410    | metal      | metal     |
| Co1Te2_ICSD_625401    | metal      | metal     |
| Co1Te2_ICSD_625403    | metal      | metal     |
| Co1Te2_ICSD_625406    | metal      | metal     |
| Co1Th1_ICSD_102699    | metal      | metal     |
| Co1Th1_ICSD_261441    | metal      | metal     |
| Co1Ti1_ICSD_625477    | metal      | metal     |
| Co1Ti2_ICSD_102706    | metal      | metal     |
| Co1Ti2_ICSD_625483    | metal      | metal     |
| Co1U1_ICSD_625521     | insulator  | metal     |
| Co1U6_ICSD_108323     | metal      | metal     |
| Co1V1_ICSD_187976     | metal      | metal     |
| Co1V3_ICSD_102716     | metal      | metal     |
| Co1W1_ICSD_187974     | metal      | metal     |
| Co1Y1_ICSD_20954      | metal      | metal     |

Supplementary Table 291. Five-fold cross validated predictions for the metal/insulator classification (283/598).

| system                | calculated | predicted |
|-----------------------|------------|-----------|
| Co1Y3_ICSD_625576     | metal      | metal     |
| Co1Zn13_ICSD_102736   | metal      | metal     |
| Co1Zr1_ICSD_102738    | metal      | metal     |
| Co1Zr2_ICSD_102740    | metal      | metal     |
| Co1Zr2_ICSD_625665    | metal      | metal     |
| Co1Zr2_ICSD_625682    | metal      | metal     |
| Co1Zr3_ICSD_102741    | metal      | metal     |
| Co1Zr3_ICSD_625670    | metal      | metal     |
| Co1_ICSD_165725       | metal      | metal     |
| Co1_ICSD_44990        | metal      | metal     |
| Co1_ICSD_53806        | metal      | metal     |
| Co1_ICSD_622436       | metal      | metal     |
| Co1_ICSD_622439       | metal      | metal     |
| Co23Hf6_ICSD_623762   | metal      | metal     |
| Co23Zr6_ICSD_102744   | metal      | metal     |
| Co2Cr1Ga1_ICSD_102318 | metal      | metal     |
| Co2Cr1In1_ICSD_416260 | metal      | metal     |
| Co2Cr1Sb1_ICSD_180208 | metal      | metal     |
| Co2Cs1S2_ICSD_622529  | metal      | metal     |
| Co2Cs1Se2_ICSD_622533 | metal      | metal     |
| Co2Cu1Ge2_ICSD_62856  | metal      | metal     |
| Co2Cu1S4_ICSD_622571  | metal      | metal     |
| Co2Dy1Ge2_ICSD_622667 | metal      | metal     |
| Co2Dy1In1_ICSD_658675 | metal      | metal     |
| Co2Dy1Si2_ICSD_622705 | metal      | metal     |
| Co2Dy1_ICSD_622647    | metal      | metal     |
| Co2Dy3Ge4_ICSD_622666 | metal      | metal     |
| Co2Er1Ge2_ICSD_106878 | metal      | metal     |
| Co2Er1Si2_ICSD_31426  | metal      | metal     |
| Co2Er1_ICSD_622733    | metal      | metal     |
| Co2Er3Ge4_ICSD_622806 | metal      | metal     |
| Co2Er5Te2_ICSD_150370 | metal      | metal     |
| Co2Eu1P2_ICSD_47200   | metal      | metal     |
| Co2Fe1Ga1_ICSD_247653 | metal      | metal     |
| Co2Fe1Ge1_ICSD_622905 | metal      | metal     |
| Co2Fe1In1_ICSD_102392 | metal      | metal     |
| Co2Fe1Si1_ICSD_622985 | metal      | metal     |
| Co2Ga1Hf1_ICSD_623080 | metal      | metal     |
| Co2Ga1La1_ICSD_623100 | metal      | metal     |
| Co2Ga1Mn1_ICSD_102438 | metal      | metal     |
| Co2Ga1Nb1_ICSD_623126 | metal      | metal     |
| Co2Ga1Ni1_ICSD_157788 | metal      | metal     |
| Co2Ga1Ni1_ICSD_169731 | metal      | metal     |
| Co2Ga1Ni1_ICSD_169733 | metal      | metal     |
| Co2Ga1Ta1_ICSD_102451 | metal      | metal     |
| Co2Ga1Ti1_ICSD_623209 | metal      | metal     |
| Co2Ga1V1_ICSD_623230  | metal      | metal     |
| Co2Ga7Mg3_ICSD_157364 | metal      | metal     |
| Co2Gd1Ge2_ICSD_106848 | metal      | metal     |
| Co2Gd1Si2_ICSD_106820 | metal      | metal     |

Supplementary Table 292. Five-fold cross validated predictions for the metal/insulator classification (284/598).

| system                 | calculated | predicted |
|------------------------|------------|-----------|
| Co2Gd1Zn20.ICSD.152112 | metal      | metal     |
| Co2Gd1.ICSD.102465     | metal      | metal     |
| Co2Gd1.ICSD.623288     | metal      | metal     |
| Co2Gd1.ICSD.623341     | metal      | metal     |
| Co2Gd4Mg3.ICSD.417035  | metal      | metal     |
| Co2Ge1Li1.ICSD.25324   | metal      | metal     |
| Co2Ge1Mn1.ICSD.623496  | metal      | metal     |
| Co2Ge1O4.ICSD.21115    | metal      | insulator |
| Co2Ge1Ti1.ICSD.169469  | metal      | metal     |
| Co2Ge1Zn1.ICSD.52994   | metal      | metal     |
| Co2Ge1.ICSD.108289     | metal      | metal     |
| Co2Ge1.ICSD.623417     | metal      | metal     |
| Co2Ge1.ICSD.623418     | metal      | metal     |
| Co2Ge1.ICSD.623430     | metal      | metal     |
| Co2Ge1.ICSD.623433     | metal      | metal     |
| Co2Ge2Ho1.ICSD.55336   | metal      | metal     |
| Co2Ge2Ho1.ICSD.623454  | metal      | metal     |
| Co2Ge2La1.ICSD.81750   | metal      | metal     |
| Co2Ge2Nd1.ICSD.106877  | metal      | metal     |
| Co2Ge2Nd1.ICSD.55787   | metal      | metal     |
| Co2Ge2Sr1.ICSD.407     | metal      | metal     |
| Co2Ge2Tb1.ICSD.86030   | metal      | metal     |
| Co2Ge2Th1.ICSD.43288   | metal      | metal     |
| Co2Ge2Tm1.ICSD.107213  | metal      | metal     |
| Co2Ge2U1.ICSD.623651   | metal      | metal     |
| Co2Ge2U1.ICSD.623653   | metal      | metal     |
| Co2Ge2Y1.ICSD.81748    | metal      | metal     |
| Co2Ge2Yb1.ICSD.623671  | metal      | metal     |
| Co2Ge3Sc3.ICSD.106479  | metal      | metal     |
| Co2Ge4Ho3.ICSD.623445  | metal      | metal     |
| Co2Ge4Tb3.ICSD.62292   | metal      | metal     |
| Co2Ge4Y3.ICSD.623661   | metal      | metal     |
| Co2H1O5P1.ICSD.79333   | insulator  | insulator |
| Co2Hf1Si2.ICSD.623793  | metal      | metal     |
| Co2Hf1Sn1.ICSD.102483  | metal      | metal     |
| Co2Hf1.ICSD.623776     | metal      | metal     |
| Co2Hf3Si3.ICSD.623799  | metal      | metal     |
| Co2Ho1In1.ICSD.658676  | metal      | metal     |
| Co2Ho1Si2.ICSD.55909   | metal      | metal     |
| Co2Ho1.ICSD.108296     | metal      | metal     |
| Co2I1Pr2.ICSD.416273   | metal      | metal     |
| Co2I1Tb2.ICSD.418080   | metal      | metal     |
| Co2In1Tb1.ICSD.370040  | metal      | metal     |
| Co2In1Y1.ICSD.658677   | metal      | metal     |
| Co2In1Zr2.ICSD.404847  | metal      | metal     |
| Co2In5Zr4.ICSD.55578   | metal      | metal     |
| Co2In9K1.ICSD.260251   | metal      | metal     |
| Co2K1S2.ICSD.623956    | metal      | metal     |
| Co2K1Se2.ICSD.182837   | metal      | metal     |
| Co2K2Na4O5.ICSD.64678  | insulator  | insulator |

Supplementary Table 293. Five-fold cross validated predictions for the metal/insulator classification (285/598).

| system                   | calculated | predicted |
|--------------------------|------------|-----------|
| Co2K2O12S3.ICSD.81082    | insulator  | insulator |
| Co2K4O5Rb2.ICSD.33797    | insulator  | insulator |
| Co2K5N1O24Y1.ICSD.24536  | metal      | metal     |
| Co2K6O7.ICSD.6153        | insulator  | insulator |
| Co2K9S7.ICSD.82347       | metal      | insulator |
| Co2La1P2.ICSD.87582      | metal      | metal     |
| Co2La1Si2.ICSD.52999     | metal      | metal     |
| Co2La1.ICSD.102510       | metal      | metal     |
| Co2La2O3Se2.ICSD.261191  | insulator  | metal     |
| Co2La3S7.ICSD.624016     | insulator  | insulator |
| Co2Lu1.ICSD.603225       | metal      | metal     |
| Co2Lu1.ICSD.624045       | metal      | metal     |
| Co2Lu1.ICSD.624055       | metal      | metal     |
| Co2Mg1.ICSD.624068       | metal      | metal     |
| Co2Mg3Tb4.ICSD.417036    | metal      | metal     |
| Co2Mn1Sb1.ICSD.53002     | metal      | metal     |
| Co2Mn1Si1.ICSD.624143    | metal      | metal     |
| Co2Mn1Sn1.ICSD.102532    | metal      | metal     |
| Co2Mo3N1.ICSD.96417      | metal      | metal     |
| Co2Mo3O8.ICSD.10143      | insulator  | insulator |
| Co2N1O24Ti5Y1.ICSD.24537 | metal      | metal     |
| Co2N1Nb4.ICSD.624252     | metal      | metal     |
| Co2N1Ta4.ICSD.624254     | metal      | metal     |
| Co2N1V4.ICSD.624256      | metal      | metal     |
| Co2N1Zr4.ICSD.624258     | metal      | metal     |
| Co2N1.ICSD.152812        | metal      | metal     |
| Co2Na3O6Sb1.ICSD.245538  | insulator  | insulator |
| Co2Na4O5Rb2.ICSD.64680   | insulator  | insulator |
| Co2Na5S5.ICSD.201439     | metal      | insulator |
| Co2Na6O6.ICSD.99580      | insulator  | insulator |
| Co2Na7O6Rb1.ICSD.66006   | insulator  | insulator |
| Co2Nb1Sn1.ICSD.624326    | metal      | metal     |
| Co2Nb1.ICSD.102549       | metal      | metal     |
| Co2Nb1.ICSD.624270       | metal      | metal     |
| Co2Nb1.ICSD.624286       | metal      | metal     |
| Co2Nb2Te4.ICSD.71196     | metal      | metal     |
| Co2Nb3Si1.ICSD.53017     | metal      | metal     |
| Co2Nb4Pd1Se12.ICSD.41026 | metal      | metal     |
| Co2Nd1P2.ICSD.73652      | metal      | metal     |
| Co2Nd1Si2.ICSD.31420     | metal      | metal     |
| Co2Nd1Si2.ICSD.31421     | metal      | metal     |
| Co2Nd1.ICSD.154725       | metal      | metal     |
| Co2Nd1.ICSD.154728       | metal      | metal     |
| Co2Nd1.ICSD.154731       | metal      | metal     |
| Co2Nd1.ICSD.154733       | metal      | metal     |
| Co2Nd1.ICSD.154734       | metal      | metal     |
| Co2Nd1.ICSD.154736       | metal      | metal     |
| Co2Nd1.ICSD.154738       | metal      | metal     |
| Co2Nd1.ICSD.624353       | metal      | metal     |
| Co2Nd1.ICSD.624374       | metal      | metal     |

Supplementary Table 294. Five-fold cross validated predictions for the metal/insulator classification (286/598).

| system                    | calculated | predicted |
|---------------------------|------------|-----------|
| Co2Nd1.ICSD_624395        | metal      | metal     |
| Co2Ni1S4.ICSD_624468      | metal      | metal     |
| Co2Ni1Se4.ICSD_624485     | metal      | metal     |
| Co2O12P4.ICSD_300027      | insulator  | insulator |
| Co2O14P4Si1.ICSD_82403    | insulator  | insulator |
| Co2O3Rb2.ICSD_95833       | insulator  | insulator |
| Co2O4Rb5.ICSD_73190       | insulator  | insulator |
| Co2O4Si1.ICSD_260092      | insulator  | insulator |
| Co2O4Si1.ICSD_8132        | insulator  | insulator |
| Co2O4Si1.ICSD_859         | insulator  | insulator |
| Co2O6P2Sc2Sr4.ICSD_262357 | metal      | metal     |
| Co2O6Sr3.ICSD_182288      | metal      | metal     |
| Co2O7P2.ICSD_59291        | insulator  | insulator |
| Co2O7P2.ICSD_74542        | insulator  | insulator |
| Co2O7Sb2.ICSD_247302      | insulator  | insulator |
| Co2O7V2.ICSD_2357         | insulator  | insulator |
| Co2O8P2Sr1.ICSD_73960     | insulator  | insulator |
| Co2O8Te3.ICSD_50702       | insulator  | insulator |
| Co2P1.ICSD_107550         | metal      | metal     |
| Co2P1.ICSD_94379          | metal      | metal     |
| Co2P2Pr1.ICSD_73650       | metal      | metal     |
| Co2P2S6.ICSD_624616       | insulator  | insulator |
| Co2P2Sm1.ICSD_624631      | metal      | metal     |
| Co2P2Sr1.ICSD_10466       | metal      | metal     |
| Co2P2Th1.ICSD_624645      | metal      | metal     |
| Co2P2U1.ICSD_67932        | metal      | metal     |
| Co2P2U1.ICSD_78577        | metal      | metal     |
| Co2Pd1Se12Ta4.ICSD_73319  | metal      | metal     |
| Co2Pr1Si2.ICSD_31418      | metal      | metal     |
| Co2Pr1.ICSD_624752        | metal      | metal     |
| Co2Pu1Si2.ICSD_604282     | metal      | metal     |
| Co2Pu1Si2.ICSD_73027      | metal      | metal     |
| Co2Pu1.ICSD_102630        | metal      | metal     |
| Co2Pu1.ICSD_624789        | metal      | metal     |
| Co2Rb1S2.ICSD_624795      | metal      | metal     |
| Co2Rb1Se2.ICSD_624798     | metal      | metal     |
| Co2S2Ti1.ICSD_100438      | insulator  | metal     |
| Co2S6Ta9.ICSD_624869      | metal      | metal     |
| Co2Sc1Si2.ICSD_624959     | metal      | metal     |
| Co2Sc1Sn1.ICSD_102646     | metal      | metal     |
| Co2Sc1.ICSD_150739        | metal      | metal     |
| Co2Sc3Si3.ICSD_41745      | metal      | metal     |
| Co2Sc3Si3.ICSD_624954     | metal      | metal     |
| Co2Se2Ti1.ICSD_625007     | metal      | metal     |
| Co2Se2Ti1.ICSD_95138      | metal      | metal     |
| Co2Si1Ti1.ICSD_625083     | metal      | metal     |
| Co2Si1V1.ICSD_659022      | metal      | metal     |
| Co2Si1.ICSD_165251        | metal      | metal     |
| Co2Si2Sm1.ICSD_53073      | metal      | metal     |
| Co2Si2Tb1.ICSD_53077      | metal      | metal     |

Supplementary Table 295. Five-fold cross validated predictions for the metal/insulator classification (287/598).

| system                 | calculated | predicted |
|------------------------|------------|-----------|
| Co2Si2Tb1.ICSD_55924   | metal      | metal     |
| Co2Si2Th1.ICSD_68210   | metal      | metal     |
| Co2Si2U1.ICSD_53084    | metal      | metal     |
| Co2Si2U1.ICSD_625105   | metal      | metal     |
| Co2Si2Y1.ICSD_53088    | metal      | metal     |
| Co2Si2Yb1.ICSD_53089   | metal      | metal     |
| Co2Si2Zr1.ICSD_625135  | metal      | metal     |
| Co2Si3Zr3.ICSD_625139  | metal      | metal     |
| Co2Si3.ICSD_625021     | metal      | insulator |
| Co2Sm1.ICSD_102665     | metal      | metal     |
| Co2Sn1Ti1.ICSD_625282  | metal      | metal     |
| Co2Sn1U2.ICSD_602789   | metal      | metal     |
| Co2Sn1V1.ICSD_625303   | metal      | metal     |
| Co2Sn1Zr1.ICSD_625314  | metal      | metal     |
| Co2Sn1.ICSD_102673     | metal      | metal     |
| Co2Sn1.ICSD_625262     | metal      | metal     |
| Co2Sn2Th1.ICSD_602653  | metal      | metal     |
| Co2Sn2U1.ICSD_602870   | metal      | metal     |
| Co2Ta1.ICSD_108152     | metal      | metal     |
| Co2Ta1.ICSD_625325     | metal      | metal     |
| Co2Ta1.ICSD_625326     | metal      | metal     |
| Co2Ta1.ICSD_625334     | metal      | metal     |
| Co2Ta1.ICSD_625347     | metal      | metal     |
| Co2Tb1.ICSD_102695     | metal      | metal     |
| Co2Tb1.ICSD_152583     | metal      | metal     |
| Co2Tb1.ICSD_157055     | metal      | metal     |
| Co2Tb1.ICSD_625375     | metal      | metal     |
| Co2Ti1.ICSD_625463     | metal      | metal     |
| Co2Ti1.ICSD_625482     | metal      | metal     |
| Co2U1Zn20.ICSD_183633  | metal      | metal     |
| Co2U1.ICSD_102713      | metal      | metal     |
| Co2U1.ICSD_102714      | metal      | metal     |
| Co2U1.ICSD_625514      | metal      | metal     |
| Co2Y1.ICSD_625633      | metal      | metal     |
| Co2Y3.ICSD_1844        | metal      | metal     |
| Co2Yb1.ICSD_625660     | metal      | metal     |
| Co2Yb1.ICSD_625661     | metal      | metal     |
| Co2Zr1.ICSD_603796     | metal      | metal     |
| Co3Cr1.ICSD_187968     | metal      | metal     |
| Co3Cs2S4.ICSD_65256    | insulator  | insulator |
| Co3Cu2Ho1.ICSD_622555  | metal      | metal     |
| Co3Dy1.ICSD_602917     | metal      | metal     |
| Co3Dy2Ga9.ICSD_622665  | metal      | metal     |
| Co3Dy2Si5.ICSD_622709  | metal      | metal     |
| Co3Dy2Si5.ICSD_88274   | metal      | metal     |
| Co3Dy4Ga16.ICSD_261781 | metal      | metal     |
| Co3Er1Ga2.ICSD_622797  | metal      | metal     |
| Co3Er1.ICSD_172411     | metal      | metal     |
| Co3Er1.ICSD_622722     | metal      | metal     |
| Co3Er1.ICSD_622769     | metal      | metal     |

Supplementary Table 296. Five-fold cross validated predictions for the metal/insulator classification (288/598).

| system                  | calculated | predicted |
|-------------------------|------------|-----------|
| Co3Er2Ga9.ICSD.622804   | metal      | metal     |
| Co3Er2Si5.ICSD.622857   | metal      | metal     |
| Co3Er4Ga16.ICSD.261783  | metal      | metal     |
| Co3Fe13.ICSD.155844     | metal      | metal     |
| Co3Fe1.ICSD.187971      | metal      | metal     |
| Co3Fe5.ICSD.155841      | metal      | metal     |
| Co3Ga16Ho4.ICSD.261782  | metal      | metal     |
| Co3Ga16Tb4.ICSD.422806  | metal      | metal     |
| Co3Ga16Y4.ICSD.261784   | metal      | metal     |
| Co3Ga1Y3.ICSD.10044     | metal      | metal     |
| Co3Ga2Ho1.ICSD.623089   | metal      | metal     |
| Co3Ga2Tb1.ICSD.102452   | metal      | metal     |
| Co3Ga9Ho2.ICSD.20952    | metal      | metal     |
| Co3Ge1Mn2.ICSD.52972    | metal      | metal     |
| Co3Hf2Si4.ICSD.20958    | metal      | metal     |
| Co3Ho1.ICSD.102486      | metal      | metal     |
| Co3Ho1.ICSD.602909      | metal      | metal     |
| Co3Ho2Si5.ICSD.623902   | metal      | metal     |
| Co3In1N1.ICSD.247066    | metal      | metal     |
| Co3In1S2Sn1.ICSD.425137 | metal      | metal     |
| Co3In2S2.ICSD.10011     | metal      | metal     |
| Co3La2.ICSD.102511      | metal      | metal     |
| Co3La2.ICSD.623979      | metal      | metal     |
| Co3La3O8.ICSD.86176     | metal      | metal     |
| Co3La4O10.ICSD.85592    | metal      | metal     |
| Co3Lu1.ICSD.624039      | metal      | metal     |
| Co3Mn1.ICSD.187970      | metal      | metal     |
| Co3Mo1.ICSD.187969      | metal      | metal     |
| Co3Mo1.ICSD.624216      | metal      | metal     |
| Co3Mo3N1.ICSD.180409    | metal      | metal     |
| Co3N1W3.ICSD.85883      | metal      | metal     |
| Co3Nb1.ICSD.150944      | metal      | metal     |
| Co3Nb1.ICSD.187966      | metal      | metal     |
| Co3Nb2Si1.ICSD.53018    | metal      | metal     |
| Co3Ni1.ICSD.187972      | metal      | metal     |
| Co3O1Ti3.ICSD.29054     | metal      | metal     |
| Co3O4.ICSD.69373        | insulator  | metal     |
| Co3O8P2.ICSD.38260      | insulator  | insulator |
| Co3O8P2.ICSD.6208       | insulator  | insulator |
| Co3O8P2.ICSD.9850       | metal      | insulator |
| Co3O8U2.ICSD.86237      | insulator  | insulator |
| Co3O8V2.ICSD.2645       | insulator  | insulator |
| Co3S2Sn2.ICSD.173764    | metal      | metal     |
| Co3S4.ICSD.106489       | insulator  | metal     |
| Co3Sb4Th3.ICSD.93872    | metal      | metal     |
| Co3Sb4U3.ICSD.624924    | insulator  | metal     |
| Co3Sc2Si1.ICSD.9966     | metal      | metal     |
| Co3Sc2Si5.ICSD.624961   | metal      | metal     |
| Co3Se4.ICSD.99989       | metal      | metal     |
| Co3Si1.ICSD.625031      | metal      | metal     |

Supplementary Table 297. Five-fold cross validated predictions for the metal/insulator classification (289/598).

| system                    | calculated | predicted |
|---------------------------|------------|-----------|
| Co3Si5Tb2.ICSD.88273      | metal      | metal     |
| Co3Si5U2.ICSD.20930       | metal      | metal     |
| Co3Sn2.ICSD.625259        | metal      | metal     |
| Co3Ta1.ICSD.187985        | metal      | metal     |
| Co3Ta1.ICSD.187991        | metal      | metal     |
| Co3Ta1.ICSD.24581         | metal      | metal     |
| Co3Tb1.ICSD.625395        | metal      | metal     |
| Co3Th1.ICSD.625418        | metal      | metal     |
| Co3Th1.ICSD.625433        | metal      | metal     |
| Co3Th7.ICSD.625455        | metal      | metal     |
| Co3Ti1.ICSD.187990        | metal      | metal     |
| Co3Ti1.ICSD.625468        | metal      | metal     |
| Co3Ti1.ICSD.625484        | metal      | metal     |
| Co3V1.ICSD.102718         | metal      | metal     |
| Co3V1.ICSD.187965         | metal      | metal     |
| Co3V1.ICSD.187988         | metal      | metal     |
| Co3V1.ICSD.187994         | metal      | metal     |
| Co3W1.ICSD.102722         | metal      | metal     |
| Co3W1.ICSD.187987         | metal      | metal     |
| Co3W1.ICSD.187993         | metal      | metal     |
| Co3Y1.ICSD.159894         | metal      | metal     |
| Co3Y1.ICSD.603098         | metal      | metal     |
| Co3Y1.ICSD.625596         | metal      | metal     |
| Co3Y1.ICSD.625636         | metal      | metal     |
| Co4Dy3Ge13.ICSD.622668    | metal      | metal     |
| Co4Dy7Ge12In1.ICSD.158000 | metal      | metal     |
| Co4Er3Ge13.ICSD.622808    | metal      | metal     |
| Co4Ge12Ho7In1.ICSD.158001 | metal      | metal     |
| Co4Ge12In1Yb7.ICSD.158002 | metal      | metal     |
| Co4Ge13Ho3.ICSD.623447    | metal      | metal     |
| Co4Ge13Lu3.ICSD.623466    | metal      | metal     |
| Co4Ge13Tb3.ICSD.623616    | metal      | metal     |
| Co4Ge13Y3.ICSD.623663     | metal      | metal     |
| Co4Ge13Yb3.ICSD.623672    | metal      | metal     |
| Co4La3Sn13.ICSD.600229    | metal      | metal     |
| Co4Nb4Si7.ICSD.624323     | metal      | metal     |
| Co4Nd1P12.ICSD.604478     | metal      | metal     |
| Co4P12Pr1.ICSD.604477     | metal      | metal     |
| Co4P12Yb1.ICSD.604479     | metal      | metal     |
| Co4Pr3Sn13.ICSD.600231    | metal      | metal     |
| Co4Sb12Sn1.ICSD.87886     | metal      | metal     |
| Co4Sc5Si10.ICSD.30519     | metal      | metal     |
| Co4Si7Ta4.ICSD.625051     | metal      | metal     |
| Co4Sn13Tb3.ICSD.423113    | metal      | metal     |
| Co4Sn13Yb3.ICSD.625310    | metal      | metal     |
| Co4Sn1U1.ICSD.159198      | metal      | metal     |
| Co5Dy1.ICSD.102345        | metal      | metal     |
| Co5Dy1.ICSD.659060        | metal      | metal     |
| Co5Er1.ICSD.102365        | metal      | metal     |
| Co5Er1.ICSD.622763        | metal      | metal     |

Supplementary Table 298. Five-fold cross validated predictions for the metal/insulator classification (290/598).

| system                 | calculated | predicted |
|------------------------|------------|-----------|
| Co5Fe11.ICSD_155842    | metal      | metal     |
| Co5Ga1Y5.ICSD_102490   | metal      | metal     |
| Co5Gd1.ICSD_102466     | metal      | metal     |
| Co5Ge7.ICSD_43386      | metal      | metal     |
| Co5H4La1.ICSD_158278   | metal      | metal     |
| Co5Ho1.ICSD_102488     | metal      | metal     |
| Co5Ho1.ICSD_623848     | metal      | metal     |
| Co5Ho1.ICSD_623864     | metal      | metal     |
| Co5La1P3.ICSD_86373    | metal      | metal     |
| Co5La1.ICSD_158277     | metal      | metal     |
| Co5La1.ICSD_623973     | metal      | metal     |
| Co5La1.ICSD_623977     | metal      | metal     |
| Co5La1.ICSD_623990     | metal      | metal     |
| Co5La1.ICSD_623992     | metal      | metal     |
| Co5La1.ICSD_624006     | metal      | metal     |
| Co5Nd1.ICSD_102559     | metal      | metal     |
| Co5Nd1.ICSD_624387     | metal      | metal     |
| Co5Nd1.ICSD_624396     | metal      | metal     |
| Co5Nd1.ICSD_657142     | metal      | metal     |
| Co5O15Sr6.ICSD_155311  | insulator  | metal     |
| Co5P3Y1.ICSD_40505     | metal      | metal     |
| Co5Pr1.ICSD_624687     | metal      | metal     |
| Co5Sm1.ICSD_102667     | metal      | metal     |
| Co5Tb1.ICSD_625383     | metal      | metal     |
| Co5Tb1.ICSD_625389     | metal      | metal     |
| Co5Th1.ICSD_102702     | metal      | metal     |
| Co5Th1.ICSD_625424     | metal      | metal     |
| Co5Th1.ICSD_625430     | metal      | metal     |
| Co5Th1.ICSD_625431     | metal      | metal     |
| Co5Y1.ICSD_625573      | metal      | metal     |
| Co5Y1.ICSD_625579      | metal      | metal     |
| Co5Y1.ICSD_625597      | metal      | metal     |
| Co6F18Rb6.ICSD_410388  | insulator  | insulator |
| Co6Ge6Hf1.ICSD_623442  | metal      | metal     |
| Co6Ge6Li1.ICSD_41459   | metal      | metal     |
| Co6Ge6Li1.ICSD_659653  | metal      | metal     |
| Co6Ge6Mg1.ICSD_623475  | metal      | metal     |
| Co6Ge6Sc1.ICSD_623581  | metal      | metal     |
| Co6Ge6Sc1.ICSD_623590  | metal      | metal     |
| Co6Ge6Tb1.ICSD_623625  | metal      | metal     |
| Co6Ge6Ti1.ICSD_623631  | metal      | metal     |
| Co6Ge6Zr1.ICSD_41460   | metal      | metal     |
| Co6Li1P4.ICSD_69692    | metal      | metal     |
| Co6Mg1P4.ICSD_94412    | metal      | metal     |
| Co6Nb7.ICSD_624281     | metal      | metal     |
| Co6Nd12Sn1.ICSD_240094 | metal      | metal     |
| Co6Ta7.ICSD_625335     | metal      | metal     |
| Co7Dy2.ICSD_658884     | metal      | metal     |
| Co7Er2.ICSD_102366     | metal      | metal     |
| Co7Fe9.ICSD_155840     | metal      | metal     |

Supplementary Table 299. Five-fold cross validated predictions for the metal/insulator classification (291/598).

| system                       | calculated | predicted |
|------------------------------|------------|-----------|
| Co7Ge6Hf4.ICSD_623435        | metal      | metal     |
| Co7Ge6Sc4.ICSD_623580        | metal      | metal     |
| Co7Ge6Ti4.ICSD_623638        | metal      | metal     |
| Co7Ge6Zr4.ICSD_52996         | metal      | metal     |
| Co7Hf2.ICSD_623764           | metal      | metal     |
| Co7Ho2.ICSD_623816           | metal      | metal     |
| Co7In14Zr9.ICSD_55561        | metal      | metal     |
| Co7La2.ICSD_623993           | metal      | metal     |
| Co7Mo6.ICSD_102544           | metal      | metal     |
| Co7Nb6.ICSD_102550           | metal      | metal     |
| Co7Th2.ICSD_102703           | metal      | metal     |
| Co7W6.ICSD_102724            | metal      | metal     |
| Co7Y2.ICSD_625563            | metal      | metal     |
| Co8Fe1S8.ICSD_622969         | metal      | metal     |
| Co8La1P5.ICSD_30701          | metal      | metal     |
| Co8Mn4Nd1.ICSD_624077        | metal      | metal     |
| Co8Mn4Pr1.ICSD_624111        | metal      | metal     |
| Co8Ni1S8.ICSD_624466         | metal      | metal     |
| Co8Pd1S8.ICSD_624682         | metal      | metal     |
| Co8Rh1S8.ICSD_624810         | metal      | metal     |
| Co8Ru1S8.ICSD_624822         | metal      | metal     |
| Co9Er1Si2.ICSD_622849        | metal      | metal     |
| Co9La1Si4.ICSD_156467        | metal      | metal     |
| Co9Nd1Si4.ICSD_79971         | metal      | metal     |
| Co9S8.ICSD_31753             | insulator  | metal     |
| Co9S8.ICSD_40046             | metal      | metal     |
| Co9Se8.ICSD_44857            | metal      | metal     |
| Co9Se8.ICSD_624990           | insulator  | metal     |
| Co9Si2Tb1.ICSD_625053        | metal      | metal     |
| Co9Si2Th1.ICSD_81931         | metal      | metal     |
| Co9Si2Y1.ICSD_625124         | metal      | metal     |
| Co9Si4Tb1.ICSD_72092         | metal      | metal     |
| Co9Si4Y1.ICSD_657471         | metal      | metal     |
| Cr0.125Ga0.875P1.ICSD_181038 | metal      | insulator |
| Cr0.25Nb1S2.ICSD_42657       | metal      | metal     |
| Cr1Cs1F4.ICSD_2278           | insulator  | insulator |
| Cr1Cs1H8N2O8.ICSD_261393     | insulator  | insulator |
| Cr1Cs1I3.ICSD_23382          | insulator  | insulator |
| Cr1Cs1I3.ICSD_8105           | metal      | insulator |
| Cr1Cs1Li1O4.ICSD_63417       | insulator  | insulator |
| Cr1Cs1P2S7.ICSD_260893       | insulator  | insulator |
| Cr1Cs2F6K1.ICSD_9705         | insulator  | insulator |
| Cr1Cs2F6.ICSD_29007          | metal      | insulator |
| Cr1Cu1O2.ICSD_163253         | insulator  | insulator |
| Cr1Cu1O2.ICSD_82065          | insulator  | metal     |
| Cr1Cu1O3S1Sr2.ICSD_84962     | insulator  | insulator |
| Cr1Cu1O4.ICSD_60825          | insulator  | insulator |
| Cr1Cu1S2.ICSD_25627          | metal      | metal     |
| Cr1Cu1S2.ICSD_42393          | insulator  | metal     |
| Cr1Cu1Se2.ICSD_24798         | metal      | metal     |

Supplementary Table 300. Five-fold cross validated predictions for the metal/insulator classification (292/598).

| system                     | calculated | predicted |
|----------------------------|------------|-----------|
| Cr1Cu1Se2.ICSD.25625       | metal      | metal     |
| Cr1Cu4O20Sr8Ti3.ICSD.81375 | metal      | insulator |
| Cr1Dy1O4.ICSD.167718       | insulator  | insulator |
| Cr1Dy1O4.ICSD.93788        | insulator  | insulator |
| Cr1Dy1O6Te1.ICSD.164943    | insulator  | insulator |
| Cr1Dy4Ga12.ICSD.424496     | metal      | metal     |
| Cr1Er1O4.ICSD.247773       | insulator  | insulator |
| Cr1Er1O4.ICSD.96406        | insulator  | insulator |
| Cr1Er1O6Te1.ICSD.164945    | insulator  | insulator |
| Cr1Eu1O4.ICSD.51696        | insulator  | metal     |
| Cr1Eu1O6Te1.ICSD.164940    | insulator  | insulator |
| Cr1F2.ICSD.31827           | insulator  | insulator |
| Cr1F3H18O9.ICSD.2379       | insulator  | insulator |
| Cr1F3K1.ICSD.172844        | insulator  | insulator |
| Cr1F3K1.ICSD.27690         | insulator  | insulator |
| Cr1F3O1.ICSD.59123         | insulator  | insulator |
| Cr1F3.ICSD.59972           | insulator  | insulator |
| Cr1F4Na1.ICSD.37108        | insulator  | insulator |
| Cr1F4Na2.ICSD.67250        | insulator  | insulator |
| Cr1F4Sr1.ICSD.26105        | metal      | insulator |
| Cr1F4Sr1.ICSD.9929         | insulator  | metal     |
| Cr1F4.ICSD.78778           | insulator  | insulator |
| Cr1F5Mn1.ICSD.1617         | insulator  | insulator |
| Cr1F5Rb1.ICSD.418674       | insulator  | insulator |
| Cr1F5Rb2.ICSD.2343         | insulator  | insulator |
| Cr1F5.ICSD.419661          | insulator  | insulator |
| Cr1F6H18Mn1N6.ICSD.2728    | insulator  | insulator |
| Cr1F6H8N2Na1.ICSD.418735   | insulator  | insulator |
| Cr1F6Hg1.ICSD.10347        | insulator  | insulator |
| Cr1F6K1Rb2.ICSD.9707       | insulator  | insulator |
| Cr1F6K1.ICSD.418672        | insulator  | insulator |
| Cr1F6K2Na1.ICSD.40965      | insulator  | insulator |
| Cr1F6Li2.ICSD.10350        | insulator  | insulator |
| Cr1F6Mg1.ICSD.10344        | insulator  | insulator |
| Cr1F6Mn1Na1.ICSD.938       | insulator  | insulator |
| Cr1F6Mo1.ICSD.50507        | insulator  | insulator |
| Cr1F6Na1Rb2.ICSD.9706      | insulator  | insulator |
| Cr1F6Na1.ICSD.418671       | insulator  | insulator |
| Cr1F6Na3.ICSD.27070        | insulator  | insulator |
| Cr1F6Nb1.ICSD.75384        | insulator  | insulator |
| Cr1F6Rb1.ICSD.418673       | insulator  | insulator |
| Cr1F6Rb2.ICSD.29006        | insulator  | insulator |
| Cr1F6Sr1.ICSD.10342        | metal      | insulator |
| Cr1F6Zr1.ICSD.35719        | metal      | insulator |
| Cr1F7Pb2.ICSD.174348       | insulator  | insulator |
| Cr1F7Rb3.ICSD.9597         | insulator  | insulator |
| Cr1F8H2K2.ICSD.418678      | insulator  | insulator |
| Cr1F8H2Na2.ICSD.418677     | insulator  | insulator |
| Cr1Fe1P1.ICSD.161257       | metal      | metal     |
| Cr1Fe2Ga1.ICSD.102755      | metal      | metal     |

Supplementary Table 301. Five-fold cross validated predictions for the metal/insulator classification (293/598).

| system                   | calculated | predicted |
|--------------------------|------------|-----------|
| Cr1Fe2Se4.ICSD.151873    | metal      | metal     |
| Cr1Fe2Se4.ICSD.625966    | metal      | metal     |
| Cr1Fe2Sn1.ICSD.185999    | metal      | metal     |
| Cr1Fe2.ICSD.188276       | metal      | metal     |
| Cr1Fe3.ICSD.188234       | metal      | metal     |
| Cr1Fe3.ICSD.188258       | metal      | metal     |
| Cr1Ga2S4.ICSD.626045     | metal      | insulator |
| Cr1Ga2S4.ICSD.626052     | metal      | insulator |
| Cr1Ga4.ICSD.626026       | metal      | metal     |
| Cr1Gd1O4.ICSD.51903      | insulator  | insulator |
| Cr1Gd1O6Te1.ICSD.164941  | insulator  | insulator |
| Cr1Ge1Nb1.ICSD.42061     | metal      | metal     |
| Cr1Ge1.ICSD.42417        | metal      | metal     |
| Cr1Ge1.ICSD.602162       | metal      | metal     |
| Cr1Ge2Li1O6.ICSD.174432  | insulator  | insulator |
| Cr1Ge2Na1O6.ICSD.260079  | insulator  | insulator |
| Cr1Ge3La1.ICSD.158976    | metal      | metal     |
| Cr1Ge3Nd1.ICSD.186694    | metal      | metal     |
| Cr1Ge3Nd1.ICSD.186696    | metal      | metal     |
| Cr1Ge3Nd1.ICSD.186697    | metal      | metal     |
| Cr1Ge3Pr1.ICSD.158978    | metal      | metal     |
| Cr1H10N4O8S2.ICSD.279585 | insulator  | insulator |
| Cr1H12N3O8.ICSD.261390   | metal      | insulator |
| Cr1H1O2.ICSD.64754       | insulator  | insulator |
| Cr1H1O2.ICSD.88574       | insulator  | insulator |
| Cr1H1.ICSD.626118        | metal      | metal     |
| Cr1H1.ICSD.76745         | metal      | metal     |
| Cr1H2.ICSD.26630         | metal      | metal     |
| Cr1H8N2O4.ICSD.16047     | insulator  | insulator |
| Cr1Hf1Si1.ICSD.626157    | metal      | metal     |
| Cr1Hg1O4.ICSD.2224       | insulator  | insulator |
| Cr1Hg1O4.ICSD.416147     | insulator  | insulator |
| Cr1Hg1O4.ICSD.416148     | insulator  | insulator |
| Cr1Hg1O6Pb2.ICSD.280778  | insulator  | insulator |
| Cr1Hg5O5S2.ICSD.76860    | insulator  | insulator |
| Cr1Hg5O6.ICSD.81605      | insulator  | insulator |
| Cr1Ho1O4.ICSD.169873     | insulator  | insulator |
| Cr1Ho1O4.ICSD.173263     | insulator  | insulator |
| Cr1Ho1O6Te1.ICSD.164944  | insulator  | insulator |
| Cr1I1K1O6.ICSD.24341     | insulator  | insulator |
| Cr1I2.ICSD.2596          | insulator  | insulator |
| Cr1I2.ICSD.4073          | insulator  | insulator |
| Cr1I3Rb1.ICSD.15504      | insulator  | insulator |
| Cr1I6Ti4.ICSD.15502      | insulator  | insulator |
| Cr1I6Ti4.ICSD.38143      | insulator  | insulator |
| Cr1In2S4.ICSD.626203     | metal      | insulator |
| Cr1Ir3.ICSD.626213       | metal      | metal     |
| Cr1K1O2.ICSD.40267       | insulator  | insulator |
| Cr1K1O2.ICSD.425293      | insulator  | insulator |
| Cr1K1O7V2.ICSD.245133    | insulator  | insulator |

Supplementary Table 302. Five-fold cross validated predictions for the metal/insulator classification (294/598).

| system                   | calculated | predicted |
|--------------------------|------------|-----------|
| Cr1K1P2S7.ICSD.91754     | insulator  | insulator |
| Cr1K1S2.ICSD.25723       | insulator  | insulator |
| Cr1K2O4.ICSD.2402        | insulator  | insulator |
| Cr1K3Mn1O8.ICSD.26803    | insulator  | insulator |
| Cr1K3O4.ICSD.108934      | insulator  | insulator |
| Cr1K3O8.ICSD.30404       | insulator  | insulator |
| Cr1La1O3.ICSD.29120      | insulator  | metal     |
| Cr1La1O3.ICSD.91270      | insulator  | insulator |
| Cr1La1O3.ICSD.91271      | insulator  | insulator |
| Cr1La1O4.ICSD.81938      | metal      | insulator |
| Cr1La1O6Te1.ICSD.164936  | insulator  | insulator |
| Cr1La1S3.ICSD.51123      | insulator  | insulator |
| Cr1La1Sb3.ICSD.83907     | metal      | metal     |
| Cr1La1Se3.ICSD.626229    | insulator  | insulator |
| Cr1La3O6S3W1.ICSD.380404 | insulator  | insulator |
| Cr1La4S7.ICSD.603686     | insulator  | insulator |
| Cr1Li1Mo2O8.ICSD.247056  | insulator  | insulator |
| Cr1Li1O2.ICSD.167479     | insulator  | insulator |
| Cr1Li1O4Rb1.ICSD.72548   | insulator  | insulator |
| Cr1Li1O4Rb1.ICSD.72552   | insulator  | insulator |
| Cr1Li1O6Si2.ICSD.55163   | insulator  | insulator |
| Cr1Li1O7P2.ICSD.240965   | insulator  | insulator |
| Cr1Li1O8W2.ICSD.165780   | insulator  | insulator |
| Cr1Li1S2.ICSD.626233     | insulator  | metal     |
| Cr1Li2O4.ICSD.1972       | insulator  | insulator |
| Cr1Lu1O4.ICSD.26988      | metal      | insulator |
| Cr1Mg1O4.ICSD.18117      | insulator  | insulator |
| Cr1Mg1O4.ICSD.18120      | insulator  | insulator |
| Cr1Mn2O9Pb2.ICSD.185692  | insulator  | insulator |
| Cr1Mo1O7V1.ICSD.408563   | insulator  | insulator |
| Cr1Mo2S4.ICSD.626322     | metal      | metal     |
| Cr1N1Nb1.ICSD.23779      | metal      | metal     |
| Cr1N1.ICSD.181079        | metal      | metal     |
| Cr1N1.ICSD.53146         | metal      | metal     |
| Cr1N2W1.ICSD.84639       | metal      | metal     |
| Cr1N3Sr3.ICSD.154803     | metal      | metal     |
| Cr1N3Th2.ICSD.108340     | metal      | metal     |
| Cr1N3U2.ICSD.87244       | metal      | metal     |
| Cr1Na1O2.ICSD.24595      | insulator  | insulator |
| Cr1Na1O6Si2.ICSD.9670    | insulator  | insulator |
| Cr1Na1O8W2.ICSD.161849   | insulator  | insulator |
| Cr1Na1S2.ICSD.660322     | insulator  | insulator |
| Cr1Na1Se2.ICSD.42391     | insulator  | insulator |
| Cr1Na2O4.ICSD.26330      | insulator  | insulator |
| Cr1Na4O4.ICSD.62676      | insulator  | insulator |
| Cr1Nb1P1.ICSD.53189      | metal      | metal     |
| Cr1Nb1Si1.ICSD.42060     | metal      | metal     |
| Cr1Nb2Se4.ICSD.23476     | metal      | metal     |
| Cr1Nb2.ICSD.188270       | metal      | metal     |
| Cr1Nb3.ICSD.188240       | metal      | metal     |

Supplementary Table 303. Five-fold cross validated predictions for the metal/insulator classification (295/598).

| system                  | calculated | predicted |
|-------------------------|------------|-----------|
| Cr1Nb3.ICSD.188252      | metal      | metal     |
| Cr1Nb4Se8.ICSD.53191    | metal      | metal     |
| Cr1Nb4Si3.ICSD.601734   | metal      | metal     |
| Cr1Nd1O3.ICSD.156328    | metal      | metal     |
| Cr1Nd1O3.ICSD.28933     | metal      | metal     |
| Cr1Nd1O4.ICSD.90461     | metal      | metal     |
| Cr1Nd1O4.ICSD.93786     | metal      | metal     |
| Cr1Nd1O6Te1.ICSD.164938 | insulator  | insulator |
| Cr1Nd1S3.ICSD.88976     | metal      | insulator |
| Cr1Ni1O4.ICSD.18116     | insulator  | insulator |
| Cr1Ni1P1.ICSD.600596    | metal      | metal     |
| Cr1Ni1P1.ICSD.626435    | metal      | metal     |
| Cr1Ni1P1.ICSD.626440    | metal      | metal     |
| Cr1Ni1Sb1.ICSD.182484   | metal      | metal     |
| Cr1Ni1Si1.ICSD.165255   | metal      | metal     |
| Cr1Ni2.ICSD.188273      | metal      | metal     |
| Cr1Ni3.ICSD.188231      | metal      | metal     |
| Cr1Ni3.ICSD.188243      | metal      | metal     |
| Cr1O1.01.ICSD.61633     | metal      | metal     |
| Cr1O2.ICSD.185887       | metal      | insulator |
| Cr1O2.ICSD.185888       | metal      | insulator |
| Cr1O2.ICSD.186838       | insulator  | metal     |
| Cr1O2.ICSD.202838       | metal      | metal     |
| Cr1O2.ICSD.290479       | metal      | metal     |
| Cr1O3Pb1.ICSD.160196    | metal      | metal     |
| Cr1O3Pr1.ICSD.28932     | metal      | metal     |
| Cr1O3Sr1.ICSD.108903    | metal      | metal     |
| Cr1O3Y1.ICSD.28909      | insulator  | insulator |
| Cr1O3.ICSD.16031        | insulator  | insulator |
| Cr1O4P1.ICSD.62159      | insulator  | insulator |
| Cr1O4Pb1.ICSD.28386     | metal      | insulator |
| Cr1O4Pb1.ICSD.91735     | insulator  | insulator |
| Cr1O4Pr1.ICSD.26978     | metal      | metal     |
| Cr1O4Re1.ICSD.173875    | metal      | insulator |
| Cr1O4Sr1.ICSD.159266    | insulator  | insulator |
| Cr1O4Sr1.ICSD.160793    | insulator  | insulator |
| Cr1O4Sr2.ICSD.245595    | metal      | metal     |
| Cr1O4Tb1.ICSD.169015    | insulator  | insulator |
| Cr1O4Tb1.ICSD.26983     | insulator  | insulator |
| Cr1O4Tl2.ICSD.247477    | insulator  | insulator |
| Cr1O4Tm1.ICSD.51905     | metal      | insulator |
| Cr1O4U1.ICSD.15724      | metal      | insulator |
| Cr1O4U1.ICSD.15859      | insulator  | metal     |
| Cr1O4V1.ICSD.36244      | insulator  | insulator |
| Cr1O4V1.ICSD.79865      | insulator  | insulator |
| Cr1O4W1.ICSD.36213      | metal      | insulator |
| Cr1O4W1.ICSD.8269       | insulator  | insulator |
| Cr1O4Y1.ICSD.157933     | insulator  | insulator |
| Cr1O4Y1.ICSD.157934     | insulator  | insulator |
| Cr1O4Yb1.ICSD.26987     | insulator  | metal     |

Supplementary Table 304. Five-fold cross validated predictions for the metal/insulator classification (296/598).

| system                  | calculated | predicted |
|-------------------------|------------|-----------|
| Cr1O5Pb2.ICSD_34831     | insulator  | insulator |
| Cr1O5Ti2.ICSD_65219     | metal      | insulator |
| Cr1O6Sr2Ta1.ICSD_157544 | insulator  | insulator |
| Cr1O6Sr2Zr1.ICSD_181750 | metal      | insulator |
| Cr1O6Ta2.ICSD_15306     | insulator  | insulator |
| Cr1O6Ta2.ICSD_9390      | insulator  | insulator |
| Cr1O6Tb1Te1.ICSD_164942 | insulator  | insulator |
| Cr1O6Te1Y1.ICSD_164948  | insulator  | insulator |
| Cr1O6Te1Yb1.ICSD_164947 | insulator  | insulator |
| Cr1O7Rb1V2.ICSD_245134  | insulator  | insulator |
| Cr1P1Pd1.ICSD_626517    | metal      | metal     |
| Cr1P1S4.ICSD_821        | metal      | insulator |
| Cr1P1S4.ICSD_937        | insulator  | insulator |
| Cr1P1Se3.ICSD_626521    | metal      | insulator |
| Cr1P1Ti1.ICSD_96721     | metal      | metal     |
| Cr1P1Zr1.ICSD_626529    | metal      | metal     |
| Cr1P1.ICSD_626502       | metal      | metal     |
| Cr1P2.ICSD_2526         | metal      | metal     |
| Cr1P4.ICSD_2790         | metal      | metal     |
| Cr1Pr2Se4.ICSD_626543   | metal      | metal     |
| Cr1Pt1Sb1.ICSD_626558   | metal      | metal     |
| Cr1Pt3.ICSD_102834      | metal      | metal     |
| Cr1Rh2Sn1.ICSD_626578   | metal      | metal     |
| Cr1Rh3.ICSD_108348      | metal      | metal     |
| Cr1S17U8.ICSD_1990      | metal      | insulator |
| Cr1S1.ICSD_16723        | insulator  | metal     |
| Cr1S1.ICSD_49666        | metal      | metal     |
| Cr1S1.ICSD_626593       | metal      | metal     |
| Cr1S2Tl1.ICSD_201396    | metal      | metal     |
| Cr1S3Sb1.ICSD_74601     | insulator  | insulator |
| Cr1S6Ta3.ICSD_626633    | metal      | metal     |
| Cr1Sb1Se3.ICSD_84866    | insulator  | insulator |
| Cr1Sb1.ICSD_626689      | metal      | metal     |
| Cr1Sb2.ICSD_246891      | metal      | metal     |
| Cr1Sb2.ICSD_42601       | metal      | metal     |
| Cr1Sb2.ICSD_86811       | metal      | metal     |
| Cr1Sb3Yb1.ICSD_158115   | metal      | metal     |
| Cr1Sb5U3.ICSD_658820    | metal      | metal     |
| Cr1Se1.ICSD_53957       | metal      | metal     |
| Cr1Se1.ICSD_626721      | metal      | metal     |
| Cr1Se2Tl1.ICSD_626736   | metal      | metal     |
| Cr1Se2.ICSD_626718      | metal      | metal     |
| Cr1Si1Te3.ICSD_626809   | insulator  | insulator |
| Cr1Si1Zr1.ICSD_626850   | metal      | metal     |
| Cr1Si1.ICSD_16837       | metal      | metal     |
| Cr1Si1.ICSD_182503      | metal      | metal     |
| Cr1Si2.ICSD_71499       | metal      | metal     |
| Cr1Si2.ICSD_71502       | insulator  | metal     |
| Cr1Si2.ICSD_96026       | insulator  | metal     |
| Cr1Sn2.ICSD_106521      | metal      | metal     |

Supplementary Table 305. Five-fold cross validated predictions for the metal/insulator classification (297/598).

| system                     | calculated | predicted |
|----------------------------|------------|-----------|
| Cr1Te1.ICSD_169766         | metal      | metal     |
| Cr1Te1.ICSD_169767         | metal      | metal     |
| Cr1Te1.ICSD_81719          | metal      | metal     |
| Cr1Te1.ICSD_93159          | metal      | metal     |
| Cr1Te2Tl1.ICSD_152836      | metal      | metal     |
| Cr1.ICSD_108326            | metal      | metal     |
| Cr1.ICSD_165726            | metal      | metal     |
| Cr1.ICSD_41505             | metal      | metal     |
| Cr1.ICSD_43526             | metal      | metal     |
| Cr1.ICSD_625712            | metal      | metal     |
| Cr1.ICSD_625716            | metal      | metal     |
| Cr2Cs3I9.ICSD_201965       | insulator  | insulator |
| Cr2Cs3I9.ICSD_201966       | insulator  | insulator |
| Cr2Cs6O7.ICSD_174316       | insulator  | insulator |
| Cr2Cu1O4.ICSD_16708        | insulator  | insulator |
| Cr2Cu1O4.ICSD_246081       | metal      | insulator |
| Cr2Cu1S4.ICSD_53111        | metal      | metal     |
| Cr2Cu1S4.ICSD_625765       | metal      | metal     |
| Cr2Cu1S4.ICSD_625769       | metal      | metal     |
| Cr2Cu1Se4.ICSD_625807      | metal      | metal     |
| Cr2Cu1Te4.ICSD_625828      | metal      | metal     |
| Cr2Dy1Ge2.ICSD_625833      | metal      | metal     |
| Cr2Dy1Si2.ICSD_625841      | metal      | metal     |
| Cr2Er1Si2.ICSD_167206      | metal      | metal     |
| Cr2Er1Si2.ICSD_625852      | metal      | metal     |
| Cr2F5.ICSD_80639           | insulator  | insulator |
| Cr2Fe1K1O8.ICSD_34472      | insulator  | insulator |
| Cr2Fe1O4.ICSD_183961       | metal      | metal     |
| Cr2Fe1O4.ICSD_183967       | metal      | metal     |
| Cr2Fe1S4.ICSD_43268        | metal      | metal     |
| Cr2Fe1S4.ICSD_625937       | metal      | metal     |
| Cr2Fe1S4.ICSD_625941       | metal      | metal     |
| Cr2Fe1Se4.ICSD_155121      | metal      | metal     |
| Cr2Fe1Se4.ICSD_43042       | insulator  | metal     |
| Cr2Fe1.ICSD_188279         | metal      | metal     |
| Cr2Fe3O12Si3.ICSD_27375    | insulator  | insulator |
| Cr2Ga1N1.ICSD_53124        | metal      | metal     |
| Cr2Ga1S4.ICSD_626049       | metal      | insulator |
| Cr2Ga6Hf3.ICSD_600971      | metal      | metal     |
| Cr2Ga6Zr3.ICSD_600972      | metal      | metal     |
| Cr2Gd1Si2.ICSD_67472       | metal      | metal     |
| Cr2Ge2Te6.ICSD_79270       | insulator  | metal     |
| Cr2Ge2Th1.ICSD_43285       | metal      | metal     |
| Cr2Ge3Mn3O12.ICSD_262732   | insulator  | insulator |
| Cr2H4In1Na1O10.ICSD_172070 | insulator  | insulator |
| Cr2H4K2Mg1O10.ICSD_96781   | insulator  | insulator |
| Cr2H4Li2O9.ICSD_20207      | insulator  | insulator |
| Cr2Hf1.ICSD_109213         | metal      | metal     |
| Cr2Hf1.ICSD_626144         | metal      | metal     |
| Cr2Hf1.ICSD_626155         | metal      | metal     |

Supplementary Table 306. Five-fold cross validated predictions for the metal/insulator classification (298/598).

| system                    | calculated | predicted |
|---------------------------|------------|-----------|
| Cr2Hg1O4.ICSD.245275      | insulator  | insulator |
| Cr2Hg1S4.ICSD.626162      | insulator  | insulator |
| Cr2Hg1Se4.ICSD.600792     | metal      | insulator |
| Cr2Ho1Si2.ICSD.67474      | metal      | metal     |
| Cr2Ho1Si2.ICSD.90408      | metal      | metal     |
| Cr2K2O7.ICSD.15824        | insulator  | insulator |
| Cr2K2O7.ICSD.280204       | insulator  | insulator |
| Cr2K3Na1O8.ICSD.74557     | insulator  | insulator |
| Cr2K3Na1O8.ICSD.74559     | insulator  | insulator |
| Cr2Li14N8O1.ICSD.151435   | insulator  | insulator |
| Cr2Li2N8O1Sr6.ICSD.411983 | insulator  | insulator |
| Cr2Mg1O4.ICSD.160954      | insulator  | insulator |
| Cr2Mg1O4.ICSD.290589      | insulator  | insulator |
| Cr2Mg3O12Si3.ICSD.27371   | insulator  | insulator |
| Cr2Mn1O4.ICSD.167400      | insulator  | insulator |
| Cr2Mn1S4.ICSD.164401      | insulator  | metal     |
| Cr2Mn3O12Si3.ICSD.77436   | insulator  | insulator |
| Cr2N1.ICSD.67400          | metal      | metal     |
| Cr2Nb1.ICSD.188264        | metal      | metal     |
| Cr2Nb1.ICSD.626379        | metal      | metal     |
| Cr2Nb1.ICSD.626381        | metal      | metal     |
| Cr2Nb2Se10.ICSD.35044     | metal      | metal     |
| Cr2Nb4Si5.ICSD.76064      | metal      | metal     |
| Cr2Nd1Si2.ICSD.108343     | metal      | metal     |
| Cr2Ni1O4.ICSD.280061      | insulator  | insulator |
| Cr2Ni1O4.ICSD.280062      | insulator  | insulator |
| Cr2Ni1O4.ICSD.37427       | metal      | insulator |
| Cr2Ni1S4.ICSD.16884       | metal      | metal     |
| Cr2Ni1.ICSD.188278        | metal      | metal     |
| Cr2O11Te4.ICSD.1          | insulator  | insulator |
| Cr2O3.ICSD.167280         | insulator  | metal     |
| Cr2O4Si1.ICSD.75639       | insulator  | insulator |
| Cr2O4Si1.ICSD.89073       | insulator  | insulator |
| Cr2O4Zn1.ICSD.290591      | insulator  | insulator |
| Cr2O4Zn1.ICSD.290592      | insulator  | insulator |
| Cr2O6Re1.ICSD.173874      | insulator  | insulator |
| Cr2O6Te1.ICSD.24794       | insulator  | insulator |
| Cr2O6U1.ICSD.274          | insulator  | insulator |
| Cr2O6W1.ICSD.20314        | insulator  | insulator |
| Cr2O7Rb2.ICSD.15034       | insulator  | insulator |
| Cr2O7Rb2.ICSD.409745      | insulator  | insulator |
| Cr2O7Ti2.ICSD.413950      | insulator  | insulator |
| Cr2O8Sr3.ICSD.85055       | metal      | insulator |
| Cr2P1.ICSD.82148          | metal      | metal     |
| Cr2Pu1Si2.ICSD.106959     | metal      | metal     |
| Cr2Pu1Si2.ICSD.602707     | metal      | metal     |
| Cr2S3.ICSD.16720          | metal      | metal     |
| Cr2S3.ICSD.626604         | metal      | metal     |
| Cr2S4Ti1.ICSD.626640      | insulator  | metal     |
| Cr2S4Zn1.ICSD.164168      | insulator  | insulator |

Supplementary Table 307. Five-fold cross validated predictions for the metal/insulator classification (299/598).

| system                  | calculated | predicted |
|-------------------------|------------|-----------|
| Cr2S8Ti1V3.ICSD.74296   | insulator  | insulator |
| Cr2Se3.ICSD.626703      | metal      | metal     |
| Cr2Se3.ICSD.626708      | metal      | metal     |
| Cr2Se4Zn1.ICSD.626751   | insulator  | metal     |
| Cr2Si2Sm1.ICSD.626799   | metal      | metal     |
| Cr2Si2Tb1.ICSD.167205   | metal      | metal     |
| Cr2Si2Tb1.ICSD.67473    | metal      | metal     |
| Cr2Si2Th1.ICSD.181877   | metal      | metal     |
| Cr2Si2Th1.ICSD.184657   | metal      | metal     |
| Cr2Si2U1.ICSD.626828    | metal      | metal     |
| Cr2Si2Y1.ICSD.626847    | metal      | metal     |
| Cr2Si2Yb1.ICSD.626849   | metal      | metal     |
| Cr2Ta1.ICSD.185190      | metal      | metal     |
| Cr2Ta1.ICSD.626867      | metal      | metal     |
| Cr2Te3.ICSD.15039       | metal      | metal     |
| Cr2Te4Ti1.ICSD.626896   | metal      | metal     |
| Cr2Te4V1.ICSD.626901    | metal      | metal     |
| Cr2Ti1.ICSD.102851      | metal      | metal     |
| Cr2Ti1.ICSD.102853      | metal      | metal     |
| Cr2Ti1.ICSD.626909      | metal      | metal     |
| Cr2Zr1.ICSD.106984      | metal      | metal     |
| Cr2Zr1.ICSD.626933      | metal      | metal     |
| Cr2Zr1.ICSD.626938      | metal      | metal     |
| Cr2Zr1.ICSD.626940      | metal      | metal     |
| Cr2Zr1.ICSD.626943      | metal      | metal     |
| Cr2Zr1.ICSD.626944      | metal      | metal     |
| Cr2Zr1.ICSD.626951      | metal      | metal     |
| Cr2Zr1.ICSD.626956      | metal      | metal     |
| Cr3Cu1O8.ICSD.155506    | insulator  | insulator |
| Cr3Fe1.ICSD.188249      | metal      | metal     |
| Cr3Ga1N1.ICSD.53125     | metal      | metal     |
| Cr3Ga1.ICSD.626025      | metal      | metal     |
| Cr3Ge1N1.ICSD.25751     | metal      | metal     |
| Cr3Ge1.ICSD.186002      | metal      | metal     |
| Cr3H1O8.ICSD.156386     | metal      | insulator |
| Cr3H6K1O14S2.ICSD.75977 | insulator  | insulator |
| Cr3In1O8.ICSD.155504    | insulator  | insulator |
| Cr3Ir1N1.ICSD.53132     | metal      | metal     |
| Cr3Ir1.ICSD.102780      | metal      | metal     |
| Cr3K1O8.ICSD.15921      | insulator  | insulator |
| Cr3Li1O8.ICSD.155851    | insulator  | insulator |
| Cr3N1Nb3.ICSD.626345    | metal      | metal     |
| Cr3N1P1.ICSD.626346     | metal      | metal     |
| Cr3N1Pd1.ICSD.53141     | metal      | metal     |
| Cr3N1Pt1.ICSD.53142     | metal      | metal     |
| Cr3N1Rh1.ICSD.53143     | metal      | metal     |
| Cr3N1Sn1.ICSD.53145     | metal      | metal     |
| Cr3N1Ta3.ICSD.626352    | metal      | metal     |
| Cr3Na1O8.ICSD.82620     | insulator  | insulator |
| Cr3Nb1.ICSD.188235      | metal      | metal     |

Supplementary Table 308. Five-fold cross validated predictions for the metal/insulator classification (300/598).

| system                     | calculated | predicted |
|----------------------------|------------|-----------|
| Cr3Nb1.ICSD_188247         | metal      | metal     |
| Cr3Nb1.ICSD_188259         | metal      | metal     |
| Cr3Ni1.ICSD_188260         | metal      | metal     |
| Cr3Ni2Si1.ICSD_53197       | metal      | metal     |
| Cr3O12Ti2.ICSD_201793      | insulator  | insulator |
| Cr3O1.ICSD_15904           | metal      | metal     |
| Cr3O8P2.ICSD_261640        | metal      | insulator |
| Cr3O8Rb1.ICSD_82622        | insulator  | insulator |
| Cr3O8Ti1.ICSD_155505       | insulator  | insulator |
| Cr3O8.ICSD_155847          | insulator  | insulator |
| Cr3Os1.ICSD_102829         | metal      | metal     |
| Cr3P1.ICSD_23560           | metal      | metal     |
| Cr3Pt1.ICSD_102836         | metal      | metal     |
| Cr3Pt1.ICSD_102837         | metal      | metal     |
| Cr3Rb1S5.ICSD_73143        | insulator  | insulator |
| Cr3Rh1.ICSD_626570         | metal      | metal     |
| Cr3Ru1.ICSD_659684         | metal      | metal     |
| Cr3S4.ICSD_81886           | metal      | metal     |
| Cr3S5Ti1.ICSD_23632        | insulator  | insulator |
| Cr3Se4.ICSD_601348         | metal      | metal     |
| Cr3Si1.ICSD_186001         | metal      | metal     |
| Cr3Si5.ICSD_626782         | metal      | metal     |
| Cr3Te4.ICSD_626873         | metal      | metal     |
| Cr4Cs2Cu1H4O16.ICSD_156678 | insulator  | insulator |
| Cr4Cu1Fe1S8.ICSD_53108     | insulator  | metal     |
| Cr4Cu1H4O16Rb2.ICSD_156677 | metal      | insulator |
| Cr4Cu1In1Se8.ICSD_250246   | metal      | insulator |
| Cr4Fe8Y1.ICSD_168240       | metal      | metal     |
| Cr4H4K2O16Zn1.ICSD_96785   | insulator  | insulator |
| Cr4Nb2Si5.ICSD_42905       | metal      | metal     |
| Cr4Nb2Si5.ICSD_626410      | metal      | metal     |
| Cr4Si5Zr2.ICSD_99577       | metal      | metal     |
| Cr5Cs1S8.ICSD_2566         | insulator  | insulator |
| Cr5Cs1Te8.ICSD_602370      | metal      | metal     |
| Cr5Ge3.ICSD_626088         | metal      | metal     |
| Cr5In1Se8.ICSD_601719      | insulator  | insulator |
| Cr5K1S8.ICSD_2568          | insulator  | insulator |
| Cr5K1Se8.ICSD_602350       | insulator  | insulator |
| Cr5K1Te8.ICSD_602368       | metal      | metal     |
| Cr5Na1Se8.ICSD_602328      | insulator  | insulator |
| Cr5P3Zr1.ICSD_409488       | metal      | metal     |
| Cr5Rb1S8.ICSD_2567         | insulator  | insulator |
| Cr5Rb1Se8.ICSD_602314      | insulator  | insulator |
| Cr5Rb1Te8.ICSD_602369      | metal      | metal     |
| Cr5S6.ICSD_43043           | metal      | metal     |
| Cr5S8Ti1.ICSD_40821        | insulator  | insulator |
| Cr5S8.ICSD_626594          | metal      | metal     |
| Cr5Se8Ti1.ICSD_88229       | insulator  | insulator |
| Cr5Se8.ICSD_626705         | metal      | metal     |
| Cr5Si3.ICSD_15683          | metal      | metal     |

Supplementary Table 309. Five-fold cross validated predictions for the metal/insulator classification (301/598).

| system                   | calculated | predicted |
|--------------------------|------------|-----------|
| Cr6Gd1Ge6.ICSD_603291    | metal      | metal     |
| Cr6Ge6Ho1.ICSD_83999     | metal      | metal     |
| Cr6Ge6Sc1.ICSD_626107    | metal      | metal     |
| Cr6Ni16Si7.ICSD_53198    | metal      | metal     |
| Cr7Nb6.ICSD_188282       | metal      | metal     |
| Cr8K2O16.ICSD_183641     | metal      | metal     |
| Cr8K2O16.ICSD_491        | metal      | metal     |
| Cr8O16Rb2.ICSD_100521    | metal      | metal     |
| Cr8O21.ICSD_155849       | insulator  | insulator |
| Cs0.33Mo1O3.ICSD_65418   | insulator  | insulator |
| Cs18O6Ti8.ICSD_421376    | metal      | metal     |
| Cs1Cu1F4.ICSD_35264      | insulator  | insulator |
| Cs1Cu1La2Se4.ICSD_93680  | insulator  | insulator |
| Cs1Cu1O1.ICSD_40161      | insulator  | insulator |
| Cs1Cu1O2.ICSD_15097      | insulator  | insulator |
| Cs1Cu1S4.ICSD_402075     | insulator  | insulator |
| Cs1Cu1Se4.ICSD_75195     | insulator  | insulator |
| Cs1Cu2I3.ICSD_150305     | insulator  | insulator |
| Cs1Cu3Er2Se5.ICSD_413675 | insulator  | insulator |
| Cs1Cu3O2.ICSD_413342     | insulator  | insulator |
| Cs1Cu3S2.ICSD_23326      | insulator  | insulator |
| Cs1Cu4S3.ICSD_23325      | metal      | metal     |
| Cs1Cu4Se3.ICSD_75196     | metal      | metal     |
| Cs1Dy1S2.ICSD_73540      | insulator  | insulator |
| Cs1Dy1Te3Zn1.ICSD_170189 | insulator  | insulator |
| Cs1Er1S2.ICSD_602875     | insulator  | insulator |
| Cs1Er1S2.ICSD_73542      | insulator  | insulator |
| Cs1Er1Te3Zn1.ICSD_170192 | insulator  | insulator |
| Cs1Eu1F3.ICSD_49577      | insulator  | insulator |
| Cs1Eu2I5.ICSD_41099      | insulator  | insulator |
| Cs1F1O2S1.ICSD_93076     | insulator  | insulator |
| Cs1F1O3S1.ICSD_82520     | insulator  | insulator |
| Cs1F1.ICSD_44288         | insulator  | insulator |
| Cs1F1.ICSD_53832         | insulator  | insulator |
| Cs1F1.ICSD_61563         | insulator  | insulator |
| Cs1F2H1O6S2.ICSD_82521   | insulator  | insulator |
| Cs1F2H1.ICSD_45858       | insulator  | insulator |
| Cs1F2Li1.ICSD_18020      | insulator  | insulator |
| Cs1F2Li1.ICSD_245965     | insulator  | insulator |
| Cs1F2N1O4S2.ICSD_81866   | insulator  | insulator |
| Cs1F2O2P1.ICSD_16875     | insulator  | insulator |
| Cs1F3Hg1.ICSD_15168      | insulator  | insulator |
| Cs1F3Mg1.ICSD_49584      | insulator  | insulator |
| Cs1F3Mn1.ICSD_31765      | insulator  | insulator |
| Cs1F3Mo1O2.ICSD_9710     | insulator  | insulator |
| Cs1F3Ni1.ICSD_15092      | insulator  | insulator |
| Cs1F3Ni1.ICSD_61278      | insulator  | insulator |
| Cs1F3O1V1.ICSD_249402    | insulator  | insulator |
| Cs1F3Pb1.ICSD_93438      | insulator  | insulator |
| Cs1F3Pb1.ICSD_93439      | insulator  | insulator |

Supplementary Table 310. Five-fold cross validated predictions for the metal/insulator classification (302/598).

| system                     | calculated | predicted |
|----------------------------|------------|-----------|
| Cs1F3Sr1.ICSD.49578        | insulator  | insulator |
| Cs1F3Yb1.ICSD.49579        | insulator  | insulator |
| Cs1F4Fe1.ICSD.6043         | insulator  | insulator |
| Cs1F4Li3.ICSD.245968       | insulator  | insulator |
| Cs1F4Mn1.ICSD.14104        | metal      | insulator |
| Cs1F4Mn1.ICSD.72396        | insulator  | insulator |
| Cs1F4Ti1.ICSD.27230        | insulator  | insulator |
| Cs1F4V1.ICSD.167354        | insulator  | insulator |
| Cs1F5Pd1Rb2.ICSD.35286     | insulator  | insulator |
| Cs1F5Pd2.ICSD.35284        | insulator  | insulator |
| Cs1F5Tb1.ICSD.59235        | metal      | insulator |
| Cs1F5Te1.ICSD.200252       | insulator  | insulator |
| Cs1F6Nb1.ICSD.183851       | insulator  | insulator |
| Cs1F6Re1.ICSD.201511       | insulator  | insulator |
| Cs1F6Ru1.ICSD.28694        | insulator  | insulator |
| Cs1F6Sb1.ICSD.201886       | insulator  | insulator |
| Cs1F7Mo1.ICSD.78390        | insulator  | insulator |
| Cs1F7Rb2Si1.ICSD.9592      | insulator  | insulator |
| Cs1F7Sb2.ICSD.14119        | insulator  | insulator |
| Cs1F7W1.ICSD.78391         | insulator  | insulator |
| Cs1F7Xe1.ICSD.404986       | insulator  | insulator |
| Cs1F8Re1.ICSD.410829       | insulator  | insulator |
| Cs1Fe1I4.ICSD.66811        | insulator  | insulator |
| Cs1Fe1O2.ICSD.180532       | insulator  | insulator |
| Cs1Fe1O2.ICSD.421173       | insulator  | insulator |
| Cs1Fe1O8S2.ICSD.245667     | insulator  | insulator |
| Cs1Fe2Se3.ICSD.81549       | metal      | metal     |
| Cs1Ga1H1O10P3.ICSD.409692  | insulator  | insulator |
| Cs1Ga1H4.ICSD.169711       | insulator  | insulator |
| Cs1Ga1H4.ICSD.169712       | insulator  | insulator |
| Cs1Ga1S2.ICSD.41888        | insulator  | insulator |
| Cs1Ga1S3.ICSD.281723       | insulator  | insulator |
| Cs1Ga3.ICSD.102863         | metal      | metal     |
| Cs1Gd1S2.ICSD.602861       | insulator  | insulator |
| Cs1Gd1S2.ICSD.73538        | insulator  | insulator |
| Cs1Ge1I3.ICSD.62559        | insulator  | insulator |
| Cs1Ge1S5Ta1.ICSD.417875    | insulator  | insulator |
| Cs1Ge1.ICSD.43517          | insulator  | insulator |
| Cs1H12Mg1O10P1.ICSD.281563 | insulator  | insulator |
| Cs1H1Mn1O10P3.ICSD.51089   | insulator  | insulator |
| Cs1H1O3S1.ICSD.56615       | insulator  | insulator |
| Cs1H1O3Se1.ICSD.202718     | insulator  | insulator |
| Cs1H1O4S1.ICSD.91808       | insulator  | insulator |
| Cs1H1O4Se1.ICSD.290645     | insulator  | insulator |
| Cs1H1.ICSD.53235           | insulator  | insulator |
| Cs1H1.ICSD.53236           | insulator  | insulator |
| Cs1H2O4P1.ICSD.200895      | insulator  | insulator |
| Cs1H3Mg1.ICSD.162260       | insulator  | insulator |
| Cs1H3O2.ICSD.280909        | insulator  | insulator |
| Cs1H4Li1N2.ICSD.62654      | insulator  | insulator |

Supplementary Table 311. Five-fold cross validated predictions for the metal/insulator classification (303/598).

| system                   | calculated | predicted |
|--------------------------|------------|-----------|
| Cs1H4Li1O5S1.ICSD.200780 | insulator  | insulator |
| Cs1H6Li2N3.ICSD.65151    | insulator  | insulator |
| Cs1Hg1La1Se3.ICSD.281441 | insulator  | insulator |
| Cs1Hg1N3O6.ICSD.28645    | metal      | metal     |
| Cs1Hg1Nd1Se3.ICSD.281444 | insulator  | insulator |
| Cs1Hg1Se3Y1.ICSD.281440  | insulator  | insulator |
| Cs1Ho1K2O8P2.ICSD.64760  | insulator  | insulator |
| Cs1Ho1S2.ICSD.73541      | insulator  | insulator |
| Cs1Ho1Te3Zn1.ICSD.170191 | insulator  | insulator |
| Cs1I14Zr6.ICSD.35146     | metal      | insulator |
| Cs1I1O3.ICSD.33665       | metal      | insulator |
| Cs1I1O3.ICSD.61009       | insulator  | insulator |
| Cs1I1O4.ICSD.83375       | insulator  | insulator |
| Cs1I1.ICSD.53835         | insulator  | insulator |
| Cs1I1.ICSD.61517         | insulator  | insulator |
| Cs1I1.ICSD.9204          | insulator  | insulator |
| Cs1I3Mg1.ICSD.87262      | insulator  | insulator |
| Cs1I3Mn1.ICSD.15950      | insulator  | insulator |
| Cs1I3Pb1.ICSD.161481     | insulator  | insulator |
| Cs1I3Sn1.ICSD.14070      | insulator  | insulator |
| Cs1I3Sn1.ICSD.69995      | insulator  | insulator |
| Cs1I3Sn1.ICSD.69997      | insulator  | insulator |
| Cs1I3Ti1.ICSD.154258     | insulator  | insulator |
| Cs1I3V1.ICSD.26454       | insulator  | insulator |
| Cs1I4Li3.ICSD.245989     | insulator  | insulator |
| Cs1I4Ti1.ICSD.59110      | insulator  | insulator |
| Cs1In3O5.ICSD.23630      | insulator  | insulator |
| Cs1In3.ICSD.102867       | metal      | metal     |
| Cs1K2O8P2Sc1.ICSD.61787  | insulator  | insulator |
| Cs1K2O8P2Yb1.ICSD.280936 | insulator  | insulator |
| Cs1K2Sb1.ICSD.53237      | insulator  | insulator |
| Cs1K2.ICSD.102870        | metal      | metal     |
| Cs1La1Nb2O7.ICSD.82378   | insulator  | insulator |
| Cs1La1Te3Zn1.ICSD.170184 | insulator  | insulator |
| Cs1Li1Mo1O4.ICSD.20805   | insulator  | insulator |
| Cs1Li1O4S1.ICSD.63181    | insulator  | insulator |
| Cs1Li1O4S1.ICSD.63182    | insulator  | insulator |
| Cs1Li1O4S1.ICSD.88900    | insulator  | insulator |
| Cs1Lu1S2.ICSD.73545      | insulator  | insulator |
| Cs1Mg1O4P1.ICSD.260423   | insulator  | insulator |
| Cs1Mn1O4.ICSD.16819      | insulator  | insulator |
| Cs1Mn1P1.ICSD.627022     | metal      | metal     |
| Cs1Mn1Sb1.ICSD.41869     | metal      | metal     |
| Cs1Mo3S3.ICSD.627033     | metal      | metal     |
| Cs1Mo3Se3.ICSD.604515    | metal      | metal     |
| Cs1Mo3Te3.ICSD.603673    | insulator  | metal     |
| Cs1Mo6Se7.ICSD.655517    | metal      | metal     |
| Cs1N1O2.ICSD.29106       | metal      | insulator |
| Cs1N1O2.ICSD.50328       | insulator  | insulator |
| Cs1N1O3.ICSD.16339       | insulator  | insulator |

Supplementary Table 312. Five-fold cross validated predictions for the metal/insulator classification (304/598).

| system                  | calculated | predicted |
|-------------------------|------------|-----------|
| Cs1N1O3.ICSD_35555      | insulator  | insulator |
| Cs1N2Nb1.ICSD_72546     | insulator  | insulator |
| Cs1N3O4S2.ICSD_281172   | insulator  | insulator |
| Cs1N3.ICSD_627047       | insulator  | insulator |
| Cs1Na1O3Ti1.ICSD_78752  | insulator  | insulator |
| Cs1Na1S1.ICSD_41323     | insulator  | insulator |
| Cs1Na1Se1.ICSD_41322    | insulator  | insulator |
| Cs1Na1Te1.ICSD_405538   | insulator  | insulator |
| Cs1Na2.ICSD_627052      | metal      | metal     |
| Cs1Nb1O3.ICSD_1266      | insulator  | insulator |
| Cs1Nb3O10Sr2.ICSD_93675 | insulator  | insulator |
| Cs1Nd1O2.ICSD_27336     | insulator  | insulator |
| Cs1O10Sr2Ta3.ICSD_93677 | insulator  | insulator |
| Cs1O2Sb1.ICSD_59329     | insulator  | insulator |
| Cs1O2Y1.ICSD_49652      | insulator  | insulator |
| Cs1O2.ICSD_627062       | metal      | metal     |
| Cs1O3V1.ICSD_1489       | insulator  | insulator |
| Cs1O3.ICSD_33847        | insulator  | insulator |
| Cs1O4P1Zn1.ICSD_85456   | insulator  | insulator |
| Cs1O4P1Zn1.ICSD_85457   | insulator  | insulator |
| Cs1O4Re1.ICSD_72817     | insulator  | insulator |
| Cs1O4Re1.ICSD_74505     | insulator  | insulator |
| Cs1O5V2.ICSD_850        | insulator  | insulator |
| Cs1O6Os2.ICSD_246507    | metal      | metal     |
| Cs1O6W2.ICSD_72634      | metal      | insulator |
| Cs1O8S2V1.ICSD_73736    | insulator  | insulator |
| Cs1O8V3.ICSD_50010      | insulator  | insulator |
| Cs1P1Pb1S4.ICSD_409821  | insulator  | insulator |
| Cs1P1Pb1Se4.ICSD_165348 | insulator  | insulator |
| Cs1P2S7V1.ICSD_59910    | insulator  | insulator |
| Cs1P3Zn4.ICSD_262031    | insulator  | insulator |
| Cs1Pr1S2.ICSD_73548     | insulator  | insulator |
| Cs1S2Sb1.ICSD_200798    | insulator  | insulator |
| Cs1S2Sm1.ICSD_73536     | metal      | insulator |
| Cs1S2Tb1.ICSD_602889    | insulator  | insulator |
| Cs1S2Tb1.ICSD_73539     | insulator  | insulator |
| Cs1S2Yb1.ICSD_603271    | metal      | metal     |
| Cs1S2Yb1.ICSD_73544     | metal      | metal     |
| Cs1S6Sb1.ICSD_67977     | insulator  | insulator |
| Cs1Sb1.ICSD_14031       | insulator  | insulator |
| Cs1Sb1.ICSD_412154      | insulator  | insulator |
| Cs1Sb2Se4.ICSD_61220    | insulator  | insulator |
| Cs1Se2Yb1.ICSD_59913    | metal      | insulator |
| Cs1Si1.ICSD_43520       | insulator  | insulator |
| Cs1Si1.ICSD_627104      | insulator  | insulator |
| Cs1Te4.ICSD_47182       | insulator  | insulator |
| Cs1Te5Ti1U1.ICSD_79885  | metal      | insulator |
| Cs1Te8Ti5.ICSD_416704   | metal      | metal     |
| Cs1Ti1.ICSD_165344      | metal      | metal     |
| Cs1.ICSD_109020         | metal      | metal     |

Supplementary Table 313. Five-fold cross validated predictions for the metal/insulator classification (305/598).

| system                      | calculated | predicted |
|-----------------------------|------------|-----------|
| Cs1.ICSD_109021             | metal      | metal     |
| Cs1.ICSD_109022             | metal      | metal     |
| Cs1.ICSD_173928             | metal      | metal     |
| Cs1.ICSD_173929             | metal      | metal     |
| Cs1.ICSD_173930             | metal      | metal     |
| Cs1.ICSD_53232              | metal      | metal     |
| Cs1.ICSD_76941              | metal      | metal     |
| Cs2.67O16Te5.33.ICSD_261688 | metal      | insulator |
| Cs2Cu1F6K1.ICSD_59102       | insulator  | insulator |
| Cs2Cu1F6.ICSD_65259         | insulator  | insulator |
| Cs2Cu1N6O12Pb1.ICSD_2381    | metal      | metal     |
| Cs2Cu1N6O12Pb1.ICSD_8284    | metal      | metal     |
| Cs2Cu1O2.ICSD_39535         | metal      | insulator |
| Cs2Cu2Sb2Se5.ICSD_88681     | insulator  | insulator |
| Cs2Cu5Se4.ICSD_54101        | metal      | insulator |
| Cs2Er1F6Na1.ICSD_23143      | insulator  | insulator |
| Cs2F10O1Sb2.ICSD_21016      | insulator  | insulator |
| Cs2F1O3P1.ICSD_172345       | insulator  | insulator |
| Cs2F4Hg1.ICSD_72353         | insulator  | insulator |
| Cs2F5Mn1.ICSD_69675         | insulator  | insulator |
| Cs2F6Fe1K1.ICSD_42144       | insulator  | insulator |
| Cs2F6Fe1Na1.ICSD_65503      | insulator  | insulator |
| Cs2F6Fe1Ti1.ICSD_6036       | insulator  | insulator |
| Cs2F6Ga1Li1.ICSD_9004       | insulator  | insulator |
| Cs2F6Ga1Na1.ICSD_55698      | insulator  | insulator |
| Cs2F6Ge1.ICSD_35547         | insulator  | insulator |
| Cs2F6Hf1.ICSD_25600         | insulator  | insulator |
| Cs2F6In1Na1.ICSD_24921      | insulator  | insulator |
| Cs2F6K1Mn1.ICSD_91036       | insulator  | insulator |
| Cs2F6K1Mn1.ICSD_91037       | insulator  | insulator |
| Cs2F6K1Mo1.ICSD_4053        | insulator  | insulator |
| Cs2F6K1Rh1.ICSD_4056        | insulator  | insulator |
| Cs2F6K1Ti1.ICSD_67146       | insulator  | insulator |
| Cs2F6K1V1.ICSD_27344        | insulator  | insulator |
| Cs2F6K1Y1.ICSD_25367        | insulator  | insulator |
| Cs2F6Mn1Na1.ICSD_37005      | metal      | insulator |
| Cs2F6Mn1.ICSD_47201         | insulator  | insulator |
| Cs2F6Mn1.ICSD_76272         | insulator  | insulator |
| Cs2F6Mo1Ti1.ICSD_15772      | insulator  | insulator |
| Cs2F6Na1Sc1.ICSD_22116      | insulator  | insulator |
| Cs2F6Na1Ti1.ICSD_22118      | insulator  | insulator |
| Cs2F6Na1Y1.ICSD_25368       | insulator  | insulator |
| Cs2F6Nb1.ICSD_72832         | insulator  | insulator |
| Cs2F6Rb1Y1.ICSD_25366       | insulator  | insulator |
| Cs2F6Si1.ICSD_26871         | insulator  | insulator |
| Cs2F6Si1.ICSD_38548         | insulator  | insulator |
| Cs2F6Sn1.ICSD_281           | insulator  | insulator |
| Cs2F6Ti1V1.ICSD_27343       | insulator  | insulator |
| Cs2F6Zr1.ICSD_25598         | insulator  | insulator |
| Cs2Fe2K4O5.ICSD_65942       | insulator  | insulator |

Supplementary Table 314. Five-fold cross validated predictions for the metal/insulator classification (306/598).

| system                    | calculated | predicted |
|---------------------------|------------|-----------|
| Cs2Ga1Li3O4.ICSD.69491    | insulator  | insulator |
| Cs2Ge1Li2O4.ICSD.36532    | insulator  | insulator |
| Cs2Ge1Te4.ICSD.78830      | insulator  | insulator |
| Cs2Ge2Se5.ICSD.411030     | insulator  | insulator |
| Cs2Ge3O9Sn1.ICSD.19031    | insulator  | insulator |
| Cs2Ge3O9Ti1.ICSD.19030    | insulator  | insulator |
| Cs2Ge4Na2.ICSD.409262     | metal      | insulator |
| Cs2H12N6Sn1.ICSD.79987    | insulator  | insulator |
| Cs2H4Mg1.ICSD.162261      | insulator  | insulator |
| Cs2H6N2P4.ICSD.413072     | insulator  | insulator |
| Cs2H8O10Sb2.ICSD.422768   | insulator  | insulator |
| Cs2Hf1I6.ICSD.201308      | insulator  | metal     |
| Cs2Hg1I4.ICSD.63110       | insulator  | insulator |
| Cs2Hg1I4.ICSD.9361        | insulator  | insulator |
| Cs2Hg1O2.ICSD.25513       | insulator  | insulator |
| Cs2Hg27.ICSD.418849       | metal      | metal     |
| Cs2Hg3I8.ICSD.4074        | insulator  | insulator |
| Cs2Hg3S8Sn2.ICSD.85598    | insulator  | insulator |
| Cs2Hg6S7.ICSD.260060      | insulator  | insulator |
| Cs2I4O11.ICSD.413942      | insulator  | insulator |
| Cs2I4Zn1.ICSD.82932       | insulator  | insulator |
| Cs2I5Li3.ICSD.35655       | insulator  | insulator |
| Cs2I6O18Zr1.ICSD.413881   | insulator  | insulator |
| Cs2I6Pd1.ICSD.280189      | insulator  | insulator |
| Cs2I6Pd1.ICSD.280190      | insulator  | insulator |
| Cs2I6Pt1.ICSD.37193       | insulator  | insulator |
| Cs2I6Sn1.ICSD.22105       | metal      | insulator |
| Cs2I6Te1.ICSD.38105       | insulator  | insulator |
| Cs2I8.ICSD.44621          | insulator  | insulator |
| Cs2K1O14Si4U2.ICSD.249936 | insulator  | insulator |
| Cs2Li1Mn1O4.ICSD.72361    | insulator  | insulator |
| Cs2Li1O4V1.ICSD.40219     | insulator  | insulator |
| Cs2Li1S4V1.ICSD.414186    | insulator  | insulator |
| Cs2Li2O4Si1.ICSD.33809    | insulator  | insulator |
| Cs2Li2O4Ti1.ICSD.33810    | insulator  | insulator |
| Cs2Mn1O4.ICSD.39503       | insulator  | insulator |
| Cs2Mn1S2.ICSD.65455       | insulator  | insulator |
| Cs2Mn1S6Te2.ICSD.165378   | insulator  | insulator |
| Cs2Mn1Se2.ICSD.65458      | insulator  | insulator |
| Cs2Mo1O2S2.ICSD.423982    | insulator  | insulator |
| Cs2N2Tb6Te7.ICSD.419405   | insulator  | insulator |
| Cs2Na1O4V1.ICSD.65963     | insulator  | insulator |
| Cs2Ni1O2.ICSD.423923      | insulator  | insulator |
| Cs2Ni1P2S6.ICSD.93485     | insulator  | insulator |
| Cs2O12Sr1V4.ICSD.250105   | insulator  | insulator |
| Cs2O12Te4.ICSD.59168      | insulator  | insulator |
| Cs2O13V5.ICSD.849         | metal      | insulator |
| Cs2O1.ICSD.27919          | insulator  | insulator |
| Cs2O2Pb1.ICSD.2268        | insulator  | insulator |
| Cs2O2Zn1.ICSD.2378        | insulator  | insulator |

Supplementary Table 315. Five-fold cross validated predictions for the metal/insulator classification (307/598).

| system                 | calculated | predicted |
|------------------------|------------|-----------|
| Cs2O2.ICSD.25529       | insulator  | insulator |
| Cs2O3Pb1.ICSD.2908     | insulator  | insulator |
| Cs2O3Pb1.ICSD.62140    | insulator  | insulator |
| Cs2O3Pr1.ICSD.1181     | insulator  | insulator |
| Cs2O3Sn2.ICSD.24392    | insulator  | insulator |
| Cs2O3Te1.ICSD.59164    | insulator  | insulator |
| Cs2O3Zr1.ICSD.67345    | insulator  | insulator |
| Cs2O3.ICSD.627061      | metal      | insulator |
| Cs2O4Ru1.ICSD.33799    | insulator  | insulator |
| Cs2O4U1.ICSD.20581     | insulator  | insulator |
| Cs2O6S2.ICSD.200865    | insulator  | insulator |
| Cs2O7P2Sr1.ICSD.39507  | insulator  | insulator |
| Cs2O7U2.ICSD.72588     | insulator  | insulator |
| Cs2O8S2.ICSD.26726     | insulator  | insulator |
| Cs2O9Si3Zr1.ICSD.93133 | insulator  | insulator |
| Cs2P2Pt1.ICSD.658699   | insulator  | insulator |
| Cs2P2S6.ICSD.33277     | insulator  | insulator |
| Cs2P2Si1.ICSD.71224    | insulator  | insulator |
| Cs2Pd3S4.ICSD.26250    | insulator  | insulator |
| Cs2Pd3Se4.ICSD.33892   | insulator  | insulator |
| Cs2Pt1Te2.ICSD.627076  | insulator  | insulator |
| Cs2Pt1.ICSD.413241     | insulator  | metal     |
| Cs2S1.ICSD.183207      | insulator  | insulator |
| Cs2S2.ICSD.200474      | insulator  | insulator |
| Cs2S3Ti1.ICSD.49739    | insulator  | insulator |
| Cs2S3.ICSD.14094       | insulator  | insulator |
| Cs2S5.ICSD.201073      | insulator  | insulator |
| Cs2S6Sn2.ICSD.73008    | insulator  | insulator |
| Cs2S6.ICSD.24678       | insulator  | insulator |
| Cs2S7Sb4.ICSD.2193     | insulator  | insulator |
| Cs2S8Sb4.ICSD.67976    | insulator  | insulator |
| Cs2Se1.ICSD.41687      | insulator  | insulator |
| Cs2Se3Zr1.ICSD.409294  | insulator  | insulator |
| Cs2Se3.ICSD.14095      | insulator  | insulator |
| Cs2Se4W1.ICSD.627102   | insulator  | insulator |
| Cs2Se5.ICSD.60087      | insulator  | insulator |
| Cs2Se6Sn2.ICSD.402842  | insulator  | insulator |
| Cs2Se6Te2.ICSD.84993   | insulator  | insulator |
| Cs2Si2Te6.ICSD.61397   | insulator  | insulator |
| Cs2Sn1Te4.ICSD.74826   | insulator  | insulator |
| Cs2Te1.ICSD.36501      | insulator  | insulator |
| Cs2Te2.ICSD.83351      | insulator  | insulator |
| Cs2Te3.ICSD.53245      | insulator  | insulator |
| Cs2Te5.ICSD.36017      | insulator  | insulator |
| Cs3Cu8Se6.ICSD.14012   | metal      | metal     |
| Cs3Er2I9.ICSD.300232   | insulator  | insulator |
| Cs3F3H12N4.ICSD.421716 | insulator  | insulator |
| Cs3F3Mo2O6.ICSD.200691 | insulator  | insulator |
| Cs3F4Li1.ICSD.245962   | insulator  | insulator |
| Cs3F5Li2.ICSD.245964   | insulator  | insulator |

Supplementary Table 316. Five-fold cross validated predictions for the metal/insulator classification (308/598).

| system                   | calculated | predicted |
|--------------------------|------------|-----------|
| Cs3F6Ti1_ICSD_19076      | insulator  | insulator |
| Cs3F6Y1_ICSD_19078       | insulator  | insulator |
| Cs3F7Ge1_ICSD_202917     | insulator  | insulator |
| Cs3F7Mn1_ICSD_9598       | insulator  | insulator |
| Cs3F7Ni1_ICSD_9600       | insulator  | insulator |
| Cs3F7Si1_ICSD_9588       | insulator  | insulator |
| Cs3F7Ti1_ICSD_9594       | insulator  | insulator |
| Cs3Fe1S3_ICSD_71991      | insulator  | insulator |
| Cs3H1O8Se2_ICSD_40439    | insulator  | insulator |
| Cs3Hg20_ICSD_240038      | metal      | metal     |
| Cs3I9Nb2_ICSD_421295     | insulator  | insulator |
| Cs3I9Sb2_ICSD_84989      | insulator  | insulator |
| Cs3I9Sb2_ICSD_89695      | insulator  | insulator |
| Cs3I9Y2_ICSD_26564       | insulator  | insulator |
| Cs3I9Zr2_ICSD_26565      | insulator  | insulator |
| Cs3N11P6_ICSD_51397      | insulator  | insulator |
| Cs3Ni1O2_ICSD_424578     | insulator  | insulator |
| Cs3O1_ICSD_15695         | metal      | insulator |
| Cs3O3Sb1_ICSD_279580     | insulator  | insulator |
| Cs3O4P1_ICSD_161678      | insulator  | insulator |
| Cs3O4Sb1_ICSD_411211     | insulator  | insulator |
| Cs3O8Ta1_ICSD_30408      | insulator  | insulator |
| Cs3P1Se4_ICSD_415021     | insulator  | insulator |
| Cs3P7_ICSD_62259         | insulator  | insulator |
| Cs3S4Sb1_ICSD_409619     | insulator  | insulator |
| Cs3Sb1Se3_ICSD_89609     | insulator  | insulator |
| Cs3Sb1Se4_ICSD_404083    | insulator  | insulator |
| Cs3Sb1_ICSD_53243        | insulator  | metal     |
| Cs4F10Mg3_ICSD_16084     | insulator  | insulator |
| Cs4Fe1O3_ICSD_423336     | insulator  | insulator |
| Cs4Fe1O4_ICSD_174309     | insulator  | insulator |
| Cs4Ge2S8_ICSD_281352     | insulator  | insulator |
| Cs4Ge2Se6_ICSD_415215    | insulator  | insulator |
| Cs4Ge2Se8_ICSD_74832     | insulator  | insulator |
| Cs4Ge4S10_ICSD_409455    | insulator  | insulator |
| Cs4H8O4P2Se6_ICSD_260478 | insulator  | insulator |
| Cs4I13Os1Pr6_ICSD_81475  | metal      | insulator |
| Cs4Ir1O4_ICSD_72287      | insulator  | insulator |
| Cs4O3Pb1_ICSD_65246      | insulator  | insulator |
| Cs4O4Pb1_ICSD_16363      | insulator  | insulator |
| Cs4O4Sn1_ICSD_65970      | insulator  | insulator |
| Cs4O4Zr1_ICSD_65160      | insulator  | insulator |
| Cs4O8P4S4_ICSD_20543     | insulator  | insulator |
| Cs4P2Pd1Se8_ICSD_165313  | insulator  | insulator |
| Cs4P2Se10_ICSD_418434    | insulator  | insulator |
| Cs4P2Se9_ICSD_81298      | insulator  | insulator |
| Cs4P6_ICSD_65185         | insulator  | insulator |
| Cs4S6Si2_ICSD_409176     | insulator  | insulator |
| Cs4Sb2_ICSD_92474        | metal      | insulator |
| Cs4Se10Si4_ICSD_409816   | insulator  | insulator |

Supplementary Table 317. Five-fold cross validated predictions for the metal/insulator classification (309/598).

| system                   | calculated | predicted |
|--------------------------|------------|-----------|
| Cs4Se4Si1_ICSD_409480    | insulator  | insulator |
| Cs4Se6Sn2_ICSD_67251     | insulator  | insulator |
| Cs4Se8Si2_ICSD_409815    | insulator  | insulator |
| Cs5Ge1P3_ICSD_65717      | metal      | metal     |
| Cs5Hg19_ICSD_240040      | metal      | metal     |
| Cs5P3Si1_ICSD_65715      | metal      | insulator |
| Cs5Te3_ICSD_34000        | insulator  | insulator |
| Cs6Fe2O5_ICSD_174313     | insulator  | insulator |
| Cs6Fe2O5_ICSD_73134      | insulator  | insulator |
| Cs6Ga1K3Sb4_ICSD_300150  | insulator  | insulator |
| Cs6Ga2Se6_ICSD_35293     | insulator  | insulator |
| Cs6Ge2Se6_ICSD_409512    | insulator  | insulator |
| Cs6I8Re6S8_ICSD_88610    | insulator  | insulator |
| Cs6In2O6_ICSD_62644      | metal      | insulator |
| Cs6Ni1O8Si2_ICSD_409506  | insulator  | insulator |
| Cs6O7Si2_ICSD_411665     | insulator  | insulator |
| Cs6P2Se14Sn2_ICSD_87578  | insulator  | insulator |
| Cs8Fe2O7_ICSD_174315     | insulator  | insulator |
| Cs8Ga4Se10_ICSD_30810    | insulator  | insulator |
| Cs8Na16Si136_ICSD_240030 | metal      | metal     |
| Cs8O19Ta6_ICSD_411856    | insulator  | insulator |
| Cs9F27Ni9_ICSD_410393    | insulator  | insulator |
| Cs9Fe1O4_ICSD_420323     | metal      | metal     |
| Cs9Ga1O4_ICSD_420320     | metal      | metal     |
| Cs9In1O4_ICSD_260842     | metal      | metal     |
| Cs9O4Sc1_ICSD_420322     | metal      | metal     |
| Cu10Sb3_ICSD_44480       | metal      | metal     |
| Cu10Sn3_ICSD_103105      | metal      | metal     |
| Cu10Sn3_ICSD_187900      | metal      | metal     |
| Cu10Sn3_ICSD_629279      | metal      | metal     |
| Cu11O26V6_ICSD_201626    | insulator  | insulator |
| Cu11Sb3_ICSD_103093      | metal      | metal     |
| Cu11Sn8Yb5_ICSD_413486   | metal      | metal     |
| Cu12S13Sb4_ICSD_62116    | metal      | metal     |
| Cu13La1_ICSD_628215      | metal      | metal     |
| Cu15Si4_ICSD_36254       | metal      | metal     |
| Cu16Mg6Si7_ICSD_628339   | metal      | metal     |
| Cu1Dy1Ge1_ICSD_82553     | metal      | metal     |
| Cu1Dy1In1_ICSD_627158    | metal      | metal     |
| Cu1Dy1O1Se1_ICSD_80359   | insulator  | insulator |
| Cu1Dy1O8W2_ICSD_73749    | insulator  | insulator |
| Cu1Dy1Pb1Se3_ICSD_152517 | insulator  | insulator |
| Cu1Dy1Pb1_ICSD_107274    | metal      | metal     |
| Cu1Dy1Pb1_ICSD_627160    | metal      | metal     |
| Cu1Dy1S2_ICSD_172847     | insulator  | insulator |
| Cu1Dy1S2_ICSD_627161     | insulator  | insulator |
| Cu1Dy1Sb2_ICSD_658232    | metal      | metal     |
| Cu1Dy1Si1_ICSD_61481     | metal      | metal     |
| Cu1Dy1Sn1_ICSD_405201    | metal      | metal     |
| Cu1Dy1Sn1_ICSD_627194    | metal      | metal     |

Supplementary Table 318. Five-fold cross validated predictions for the metal/insulator classification (310/598).

| system                            | calculated | predicted |
|-----------------------------------|------------|-----------|
| Cu1Dy1.ICSD.627125                | metal      | metal     |
| Cu1Dy2Ge4O12.ICSD.95168           | insulator  | insulator |
| Cu1Dy2Rb1Se4.ICSD.91092           | insulator  | insulator |
| Cu1Dy3Ge1S7.ICSD.627147           | insulator  | insulator |
| Cu1Dy3Ge1Se7.ICSD.280032          | insulator  | insulator |
| Cu1Dy3S7Si1.ICSD.156279           | insulator  | insulator |
| Cu1Dy3S7Sn1.ICSD.155943           | insulator  | insulator |
| Cu1Dy3Se7Si1.ICSD.627179          | insulator  | insulator |
| Cu1Dy3Se7Sn1.ICSD.152552          | insulator  | insulator |
| Cu1Er1Ge1.ICSD.82555              | metal      | metal     |
| Cu1Er1In1.ICSD.627226             | metal      | metal     |
| Cu1Er1O8W2.ICSD.73747             | insulator  | insulator |
| Cu1Er1P2.ICSD.94444               | metal      | metal     |
| Cu1Er1Pb1Se3.ICSD.152519          | insulator  | insulator |
| Cu1Er1Pb1.ICSD.107284             | metal      | metal     |
| Cu1Er1Pb1.ICSD.627233             | metal      | metal     |
| Cu1Er1S2.ICSD.156291              | insulator  | insulator |
| Cu1Er1S2.ICSD.172849              | insulator  | insulator |
| Cu1Er1Sb2.ICSD.658234             | metal      | metal     |
| Cu1Er1Si1.ICSD.30768              | metal      | metal     |
| Cu1Er1Sn1.ICSD.627260             | metal      | metal     |
| Cu1Er1.ICSD.102881                | metal      | metal     |
| Cu1Er2Ge4O12.ICSD.89987           | insulator  | insulator |
| Cu1Er2K1Se4.ICSD.95029            | insulator  | insulator |
| Cu1Er3Ge1S7.ICSD.155080           | insulator  | insulator |
| Cu1Er3S7Si1.ICSD.627245           | insulator  | insulator |
| Cu1Er3S7Sn1.ICSD.627247           | insulator  | insulator |
| Cu1Eu1F1S1.ICSD.172797            | insulator  | insulator |
| Cu1Eu1F1Se1.ICSD.172799           | insulator  | insulator |
| Cu1Eu1F1Te1.ICSD.419381           | insulator  | insulator |
| Cu1Eu1O1Se1.ICSD.159258           | metal      | insulator |
| Cu1Eu1O2.ICSD.18106               | metal      | metal     |
| Cu1Eu1P1.ICSD.53253               | metal      | metal     |
| Cu1Eu1Sb1.ICSD.53254              | metal      | metal     |
| Cu1Eu1Sn2.ICSD.416795             | metal      | metal     |
| Cu1Eu1.ICSD.108374                | metal      | metal     |
| Cu1Eu1.ICSD.627270                | metal      | metal     |
| Cu1Eu2O4.ICSD.71183               | metal      | metal     |
| Cu1F11Na1Zr2.ICSD.78869           | insulator  | insulator |
| Cu1F16Sb2Xe2.ICSD.249655          | insulator  | insulator |
| Cu1F1H4O5P1.ICSD.33923            | insulator  | insulator |
| Cu1F1Na0.125S1Sr0.875.ICSD.157434 | metal      | insulator |
| Cu1F1Na1O4S1.ICSD.262273          | insulator  | insulator |
| Cu1F1Nb1O3.ICSD.200533            | insulator  | insulator |
| Cu1F1S1Sr1.ICSD.157433            | insulator  | insulator |
| Cu1F1Se1Sr1.ICSD.172798           | insulator  | insulator |
| Cu1F1Sr1Te1.ICSD.183708           | insulator  | insulator |
| Cu1F1.ICSD.52273                  | metal      | insulator |
| Cu1F20Sb2Xe4.ICSD.249656          | metal      | insulator |
| Cu1F24Sb2Xe6.ICSD.416303          | insulator  | insulator |

Supplementary Table 319. Five-fold cross validated predictions for the metal/insulator classification (311/598).

| system                    | calculated | predicted |
|---------------------------|------------|-----------|
| Cu1F2H12N2O8P2.ICSD.74551 | metal      | insulator |
| Cu1F2H4O2.ICSD.27866      | insulator  | insulator |
| Cu1F2O3W1.ICSD.60759      | insulator  | insulator |
| Cu1F2.ICSD.9790           | insulator  | insulator |
| Cu1F3K1.ICSD.21111        | insulator  | insulator |
| Cu1F3K1.ICSD.27689        | metal      | insulator |
| Cu1F3K1.ICSD.8000         | insulator  | insulator |
| Cu1F3K1.ICSD.9856         | insulator  | insulator |
| Cu1F3Na1.ICSD.69655       | insulator  | insulator |
| Cu1F3Rb1.ICSD.109293      | insulator  | insulator |
| Cu1F3Rb1.ICSD.69656       | insulator  | insulator |
| Cu1F3Tl1.ICSD.43457       | metal      | insulator |
| Cu1F4H12N2O2.ICSD.39518   | metal      | insulator |
| Cu1F4K2.ICSD.31688        | insulator  | insulator |
| Cu1F4Na2.ICSD.34602       | insulator  | insulator |
| Cu1F4Sr1.ICSD.9927        | insulator  | insulator |
| Cu1F6H8O4Si1.ICSD.39564   | insulator  | insulator |
| Cu1F6K2Na1.ICSD.22111     | insulator  | insulator |
| Cu1F6Pt1.ICSD.64660       | insulator  | insulator |
| Cu1F6Sn1.ICSD.25016       | metal      | insulator |
| Cu1F6Sn1.ICSD.36514       | insulator  | insulator |
| Cu1F6Sr2.ICSD.26106       | metal      | insulator |
| Cu1F6Sr2.ICSD.9926        | insulator  | insulator |
| Cu1F6Zr1.ICSD.30116       | metal      | insulator |
| Cu1F6Zr1.ICSD.30117       | insulator  | insulator |
| Cu1F8H12O6Sb2.ICSD.20925  | metal      | metal     |
| Cu1Fe1O2.ICSD.246913      | insulator  | metal     |
| Cu1Fe1O2.ICSD.66546       | metal      | metal     |
| Cu1Fe1O2.ICSD.98488       | metal      | insulator |
| Cu1Fe1O3S1Sr2.ICSD.84963  | insulator  | insulator |
| Cu1Fe1Pt2.ICSD.627330     | metal      | metal     |
| Cu1Fe1S2.ICSD.2518        | metal      | metal     |
| Cu1Fe1S2.ICSD.27653       | metal      | metal     |
| Cu1Fe1Se2.ICSD.656334     | metal      | metal     |
| Cu1Fe2Ge2.ICSD.62330      | metal      | metal     |
| Cu1Fe2In1Se4.ICSD.160047  | insulator  | metal     |
| Cu1Fe2S3.ICSD.29095       | metal      | insulator |
| Cu1Fe2S3.ICSD.42104       | metal      | insulator |
| Cu1Ga1Hf1.ICSD.627409     | metal      | metal     |
| Cu1Ga1I4.ICSD.400817      | insulator  | insulator |
| Cu1Ga1O2.ICSD.60846       | insulator  | insulator |
| Cu1Ga1O2.ICSD.95664       | insulator  | insulator |
| Cu1Ga1O3S1Sr2.ICSD.83630  | insulator  | insulator |
| Cu1Ga1Pt2.ICSD.102928     | metal      | metal     |
| Cu1Ga1S2.ICSD.187021      | insulator  | insulator |
| Cu1Ga1Se2.ICSD.603766     | insulator  | insulator |
| Cu1Ga1Te2.ICSD.627551     | insulator  | insulator |
| Cu1Ga1U1.ICSD.602613      | metal      | metal     |
| Cu1Ga1Zr1.ICSD.627583     | metal      | metal     |
| Cu1Ga2O10Se3.ICSD.249926  | insulator  | insulator |

Supplementary Table 320. Five-fold cross validated predictions for the metal/insulator classification (312/598).

| system                     | calculated | predicted |
|----------------------------|------------|-----------|
| Cu1Ga2_ICSD_102906         | metal      | metal     |
| Cu1Gd1Ge1_ICSD_416030      | metal      | metal     |
| Cu1Gd1O1Se1_ICSD_80358     | insulator  | insulator |
| Cu1Gd1S2_ICSD_415077       | metal      | insulator |
| Cu1Gd1S3Sr1_ICSD_250435    | insulator  | insulator |
| Cu1Gd1Sb2_ICSD_153568      | metal      | metal     |
| Cu1Gd1Sb2_ICSD_658230      | metal      | metal     |
| Cu1Gd1Si1_ICSD_108359      | metal      | metal     |
| Cu1Gd1Si1_ICSD_30764       | metal      | metal     |
| Cu1Gd1Sn1_ICSD_151171      | metal      | metal     |
| Cu1Gd1Sn1_ICSD_600994      | metal      | metal     |
| Cu1Gd1Sn1_ICSD_627665      | metal      | metal     |
| Cu1Gd1_ICSD_102949         | metal      | metal     |
| Cu1Gd1_ICSD_627589         | metal      | metal     |
| Cu1Gd2K1Mo4O16_ICSD_404016 | insulator  | insulator |
| Cu1Gd2K1S4_ICSD_408854     | insulator  | insulator |
| Cu1Gd2O12Se4_ICSD_412945   | metal      | insulator |
| Cu1Gd2O4_ICSD_65015        | metal      | metal     |
| Cu1Gd2Rb1Se4_ICSD_91091    | insulator  | insulator |
| Cu1Gd3Ge1S7_ICSD_627608    | insulator  | insulator |
| Cu1Gd3S7Si1_ICSD_627636    | insulator  | insulator |
| Cu1Gd3S7Sn1_ICSD_627638    | insulator  | insulator |
| Cu1Ge1Hf1_ICSD_290194      | metal      | metal     |
| Cu1Ge1Hf1_ICSD_627690      | metal      | metal     |
| Cu1Ge1Ho1_ICSD_603200      | metal      | metal     |
| Cu1Ge1Ho1_ICSD_82554       | metal      | metal     |
| Cu1Ge1Ho3S7_ICSD_159888    | insulator  | insulator |
| Cu1Ge1La3S7_ICSD_627711    | insulator  | insulator |
| Cu1Ge1La3Se7_ICSD_95026    | insulator  | insulator |
| Cu1Ge1Li2_ICSD_627718      | metal      | metal     |
| Cu1Ge1Mg1_ICSD_627730      | metal      | metal     |
| Cu1Ge1Mn2_ICSD_184949      | metal      | metal     |
| Cu1Ge1Nd3S7_ICSD_627749    | insulator  | insulator |
| Cu1Ge1Nd3Se7_ICSD_627750   | insulator  | insulator |
| Cu1Ge1O3_ICSD_96085        | metal      | insulator |
| Cu1Ge1Pr3S7_ICSD_627770    | insulator  | insulator |
| Cu1Ge1Pr3Se7_ICSD_154744   | insulator  | insulator |
| Cu1Ge1S7Tb3_ICSD_155078    | insulator  | insulator |
| Cu1Ge1S7Y3_ICSD_154626     | insulator  | insulator |
| Cu1Ge1Sc1_ICSD_627808      | metal      | metal     |
| Cu1Ge1Se7Tb3_ICSD_154748   | insulator  | insulator |
| Cu1Ge1Se7Y3_ICSD_157111    | insulator  | insulator |
| Cu1Ge1Tb1_ICSD_82552       | metal      | metal     |
| Cu1Ge1U1_ICSD_57201        | metal      | metal     |
| Cu1Ge1Yb1_ICSD_245766      | metal      | metal     |
| Cu1Ge1Yb1_ICSD_414432      | metal      | metal     |
| Cu1Ge1Yb1_ICSD_603203      | metal      | metal     |
| Cu1Ge1Zr1_ICSD_627886      | metal      | metal     |
| Cu1Ge2Hf1_ICSD_627688      | metal      | metal     |
| Cu1Ge2La1_ICSD_627707      | metal      | metal     |

Supplementary Table 321. Five-fold cross validated predictions for the metal/insulator classification (313/598).

| system                    | calculated | predicted |
|---------------------------|------------|-----------|
| Cu1Ge2Nd1_ICSD_627744     | metal      | metal     |
| Cu1Ge2Nd2O8_ICSD_81073    | insulator  | insulator |
| Cu1Ge2O7Sr2_ICSD_86843    | insulator  | insulator |
| Cu1Ge2Pr1_ICSD_627765     | metal      | metal     |
| Cu1Ge2Zr1_ICSD_627883     | metal      | metal     |
| Cu1Ge4Ho2O12_ICSD_89986   | insulator  | insulator |
| Cu1Ge4O12Tb2_ICSD_95167   | insulator  | insulator |
| Cu1H10O9Se1_ICSD_280783   | metal      | metal     |
| Cu1H12I4N4_ICSD_4072      | metal      | insulator |
| Cu1H12N10O8_ICSD_412606   | metal      | metal     |
| Cu1H12N2O12_ICSD_171146   | insulator  | insulator |
| Cu1H12N2O6Sn1_ICSD_103    | metal      | insulator |
| Cu1H18N6O10V2_ICSD_417860 | metal      | insulator |
| Cu1H1I1O4_ICSD_41804      | insulator  | insulator |
| Cu1H1O4P1_ICSD_260593     | insulator  | insulator |
| Cu1H1O5S1Ti1_ICSD_36581   | metal      | insulator |
| Cu1H1O5Se1Ti1_ICSD_36582  | insulator  | insulator |
| Cu1H1_ICSD_44859          | insulator  | metal     |
| Cu1H2K1O5P1_ICSD_9        | insulator  | insulator |
| Cu1H2O2_ICSD_68459        | insulator  | insulator |
| Cu1H2O4Si1_ICSD_20199     | insulator  | insulator |
| Cu1H2O5S1_ICSD_68184      | metal      | insulator |
| Cu1H2O5Se1_ICSD_39887     | insulator  | insulator |
| Cu1H2O6Pb1S1_ICSD_164673  | insulator  | metal     |
| Cu1H2O6Se2_ICSD_51676     | insulator  | insulator |
| Cu1H3O7V2_ICSD_281323     | insulator  | insulator |
| Cu1H4O4P2_ICSD_280918     | insulator  | insulator |
| Cu1H4O4P2_ICSD_280921     | insulator  | insulator |
| Cu1H5O5P1_ICSD_260208     | insulator  | insulator |
| Cu1H6N1O5P1_ICSD_250189   | insulator  | insulator |
| Cu1H6N4O4_ICSD_72461      | insulator  | insulator |
| Cu1H6O14Pb4S2_ICSD_380382 | metal      | insulator |
| Cu1H6O5Sr1_ICSD_154808    | insulator  | insulator |
| Cu1H6O7S1_ICSD_34679      | insulator  | insulator |
| Cu1Hf0.5P1_ICSD_627904    | metal      | metal     |
| Cu1Hf1Hg2_ICSD_102969     | metal      | metal     |
| Cu1Hf1K1S3_ICSD_409293    | insulator  | insulator |
| Cu1Hf1Na1Se3_ICSD_402578  | insulator  | insulator |
| Cu1Hf1S3Ti1_ICSD_82562    | insulator  | insulator |
| Cu1Hf1Se3Ti1_ICSD_82563   | insulator  | insulator |
| Cu1Hf1Si1_ICSD_627916     | metal      | metal     |
| Cu1Hf1Si2_ICSD_627918     | metal      | metal     |
| Cu1Hf2Na1Se5_ICSD_98476   | insulator  | insulator |
| Cu1Hf2Sb3_ICSD_93243      | metal      | metal     |
| Cu1Hf2_ICSD_627900        | metal      | metal     |
| Cu1Hf4P1_ICSD_627906      | metal      | metal     |
| Cu1Hf4Si4_ICSD_421374     | metal      | metal     |
| Cu1Hf5Pb3_ICSD_107314     | metal      | metal     |
| Cu1Hf5Sn3_ICSD_107310     | metal      | metal     |
| Cu1Hg1I1S1_ICSD_413429    | insulator  | insulator |

Supplementary Table 322. Five-fold cross validated predictions for the metal/insulator classification (314/598).

| system                     | calculated | predicted |
|----------------------------|------------|-----------|
| Cu1Hg2Ti1_ICSD_102972      | metal      | metal     |
| Cu1Hg2Zr1_ICSD_102973      | metal      | metal     |
| Cu1Ho1In1_ICSD_162738      | metal      | metal     |
| Cu1Ho1P2_ICSD_94443        | metal      | metal     |
| Cu1Ho1Pb1Se3_ICSD_154669   | insulator  | insulator |
| Cu1Ho1Pb1_ICSD_107283      | metal      | metal     |
| Cu1Ho1Pb1_ICSD_627959      | metal      | metal     |
| Cu1Ho1S2_ICSD_172848       | insulator  | insulator |
| Cu1Ho1S2_ICSD_627960       | insulator  | insulator |
| Cu1Ho1Sb2_ICSD_153571      | metal      | metal     |
| Cu1Ho1Si1_ICSD_61482       | metal      | metal     |
| Cu1Ho1Sn1_ICSD_601006      | metal      | metal     |
| Cu1Ho1_ICSD_102974         | metal      | metal     |
| Cu1Ho2K1Mo4O16_ICSD_380015 | insulator  | insulator |
| Cu1Ho2K1S4_ICSD_97561      | insulator  | insulator |
| Cu1Ho2K1Se4_ICSD_95028     | insulator  | insulator |
| Cu1Ho2O5Sr1_ICSD_172226    | insulator  | insulator |
| Cu1Ho3S7Si1_ICSD_159886    | insulator  | insulator |
| Cu1Ho3S7Sn1_ICSD_155944    | insulator  | insulator |
| Cu1Ho3Se7Si1_ICSD_159887   | insulator  | insulator |
| Cu1I1P4Se4_ICSD_410913     | insulator  | insulator |
| Cu1I1Te2_ICSD_67253        | insulator  | insulator |
| Cu1I1_ICSD_163445          | metal      | insulator |
| Cu1I1_ICSD_23990           | insulator  | insulator |
| Cu1I1_ICSD_246688          | insulator  | insulator |
| Cu1I1_ICSD_246690          | insulator  | insulator |
| Cu1I1_ICSD_24772           | insulator  | insulator |
| Cu1I1_ICSD_30363           | insulator  | insulator |
| Cu1I1_ICSD_84217           | insulator  | insulator |
| Cu1I2O6_ICSD_2232          | insulator  | insulator |
| Cu1I2O6_ICSD_4327          | insulator  | insulator |
| Cu1I3Na1O9_ICSD_62367      | metal      | insulator |
| Cu1In1La1_ICSD_628010      | metal      | metal     |
| Cu1In1Lu1_ICSD_628015      | metal      | metal     |
| Cu1In1Mo2O8_ICSD_73097     | insulator  | insulator |
| Cu1In1Nd1_ICSD_162733      | metal      | metal     |
| Cu1In1O2_ICSD_91058        | insulator  | insulator |
| Cu1In1O2_ICSD_95670        | insulator  | insulator |
| Cu1In1O8W2_ICSD_74944      | insulator  | insulator |
| Cu1In1P2Se6_ICSD_71969     | insulator  | insulator |
| Cu1In1Pr1_ICSD_628048      | metal      | metal     |
| Cu1In1Pt2_ICSD_108380      | metal      | metal     |
| Cu1In1S2_ICSD_600239       | insulator  | insulator |
| Cu1In1Se2_ICSD_73351       | metal      | insulator |
| Cu1In1Ta2Te4_ICSD_161365   | metal      | metal     |
| Cu1In1Tb1_ICSD_260991      | metal      | metal     |
| Cu1In1Te2_ICSD_628160      | insulator  | insulator |
| Cu1In1Y1_ICSD_628181       | metal      | metal     |
| Cu1In1_ICSD_180112         | metal      | metal     |
| Cu1In2O4_ICSD_39475        | metal      | insulator |

Supplementary Table 323. Five-fold cross validated predictions for the metal/insulator classification (315/598).

| system                   | calculated | predicted |
|--------------------------|------------|-----------|
| Cu1In2Se4_ICSD_183470    | metal      | insulator |
| Cu1In2_ICSD_180113       | metal      | metal     |
| Cu1In2_ICSD_187899       | metal      | metal     |
| Cu1Ir1O6Sr3_ICSD_36628   | insulator  | metal     |
| Cu1Ir2S4_ICSD_75532      | metal      | metal     |
| Cu1K1Na2O2_ICSD_47105    | insulator  | insulator |
| Cu1K1Nd2S4_ICSD_97558    | insulator  | insulator |
| Cu1K1O1_ICSD_188529      | metal      | metal     |
| Cu1K1O1_ICSD_37325       | insulator  | insulator |
| Cu1K1O1_ICSD_40158       | insulator  | insulator |
| Cu1K1O2_ICSD_203081      | insulator  | insulator |
| Cu1K1O4P1_ICSD_100172    | insulator  | insulator |
| Cu1K1Pd1Se5_ICSD_281423  | insulator  | insulator |
| Cu1K1S1_ICSD_49008       | insulator  | insulator |
| Cu1K1S3Th1_ICSD_170864   | insulator  | insulator |
| Cu1K1S3U1_ICSD_249701    | insulator  | insulator |
| Cu1K1S3Zr1_ICSD_80624    | insulator  | insulator |
| Cu1K1S4Tb2_ICSD_97560    | insulator  | insulator |
| Cu1K1S4Y2_ICSD_97557     | insulator  | insulator |
| Cu1K1Se1_ICSD_12157      | insulator  | insulator |
| Cu1K1Se3U1_ICSD_156246   | insulator  | insulator |
| Cu1K1Se3Zr1_ICSD_80625   | insulator  | insulator |
| Cu1K1Te1_ICSD_12158      | insulator  | insulator |
| Cu1K2N6O12Pb1_ICSD_1274  | metal      | metal     |
| Cu1K2N6O12Pb1_ICSD_16127 | metal      | metal     |
| Cu1K2N6O12Pb1_ICSD_36135 | insulator  | metal     |
| Cu1K2N6O12Sr1_ICSD_178   | metal      | metal     |
| Cu1K2Nb1S4_ICSD_402422   | insulator  | insulator |
| Cu1K2Nb1Se4_ICSD_73324   | insulator  | insulator |
| Cu1K2O12P4_ICSD_23754    | insulator  | insulator |
| Cu1K2P1_ICSD_61082       | insulator  | insulator |
| Cu1K2S3Sb1_ICSD_415483   | insulator  | insulator |
| Cu1K2S4V1_ICSD_81414     | insulator  | insulator |
| Cu1K2Sb1_ICSD_53298      | insulator  | insulator |
| Cu1K2Se4Ta1_ICSD_72427   | insulator  | insulator |
| Cu1K2Se4V1_ICSD_84303    | insulator  | insulator |
| Cu1K3O2_ICSD_48180       | insulator  | insulator |
| Cu1K5Sb2_ICSD_32032      | insulator  | insulator |
| Cu1K6O8Si2_ICSD_85404    | insulator  | insulator |
| Cu1La1Mg4_ICSD_418214    | metal      | metal     |
| Cu1La1O1S1_ICSD_201046   | insulator  | insulator |
| Cu1La1O1Se1_ICSD_96758   | insulator  | insulator |
| Cu1La1O1Te1_ICSD_154591  | insulator  | insulator |
| Cu1La1O2_ICSD_18102      | insulator  | insulator |
| Cu1La1O3_ICSD_73554      | metal      | metal     |
| Cu1La1O8W2_ICSD_68614    | insulator  | insulator |
| Cu1La1Pb1_ICSD_628235    | metal      | metal     |
| Cu1La1S1Te1_ICSD_88012   | insulator  | insulator |
| Cu1La1S2_ICSD_24375      | insulator  | insulator |
| Cu1La1S2_ICSD_415078     | insulator  | insulator |

Supplementary Table 324. Five-fold cross validated predictions for the metal/insulator classification (316/598).

| system                   | calculated | predicted |
|--------------------------|------------|-----------|
| Cu1La1Sb2.ICSD_658225    | metal      | metal     |
| Cu1La1Se2.ICSD_99675     | insulator  | insulator |
| Cu1La1Si1.ICSD_84207     | metal      | metal     |
| Cu1La1Sn1.ICSD_416545    | metal      | metal     |
| Cu1La1.ICSD_628213       | metal      | metal     |
| Cu1La2O4.ICSD_173894     | metal      | metal     |
| Cu1La2O4.ICSD_261659     | metal      | metal     |
| Cu1La2O4.ICSD_56528      | metal      | metal     |
| Cu1La2O4.ICSD_67837      | metal      | metal     |
| Cu1La2O4.ICSD_73910      | metal      | metal     |
| Cu1La2S4.ICSD_628243     | insulator  | insulator |
| Cu1La3S7Sn1.ICSD_628248  | insulator  | insulator |
| Cu1La3Se7Si1.ICSD_628256 | insulator  | insulator |
| Cu1La3Se7Sn1.ICSD_152545 | insulator  | insulator |
| Cu1La4S7.ICSD_628240     | metal      | insulator |
| Cu1Li1O1.ICSD_188527     | metal      | metal     |
| Cu1Li1O1.ICSD_49755      | insulator  | insulator |
| Cu1Li1O2.ICSD_74978      | insulator  | insulator |
| Cu1Li1O4V1.ICSD_65677    | insulator  | insulator |
| Cu1Li1O9P3.ICSD_2808     | insulator  | insulator |
| Cu1Li2O2.ICSD_174134     | insulator  | insulator |
| Cu1Li2O2.ICSD_67150      | insulator  | insulator |
| Cu1Li2O7P2.ICSD_160321   | insulator  | insulator |
| Cu1Li2O8W2.ICSD_92854    | insulator  | insulator |
| Cu1Li2P1.ICSD_240250     | metal      | insulator |
| Cu1Li2Sb1.ICSD_181259    | insulator  | metal     |
| Cu1Li2Sn1.ICSD_103043    | metal      | metal     |
| Cu1Li3O3.ICSD_4201       | insulator  | insulator |
| Cu1Lu1Pb1.ICSD_107286    | metal      | metal     |
| Cu1Lu1S2.ICSD_628310     | insulator  | insulator |
| Cu1Lu1Sb2.ICSD_658237    | metal      | metal     |
| Cu1Lu1Si1.ICSD_30771     | metal      | metal     |
| Cu1Lu1Sn1.ICSD_416546    | metal      | metal     |
| Cu1Lu1Sn1.ICSD_628323    | metal      | metal     |
| Cu1Mg1P1.ICSD_8221       | insulator  | metal     |
| Cu1Mg1Sb1.ICSD_77364     | metal      | metal     |
| Cu1Mg1Sn1.ICSD_103054    | metal      | metal     |
| Cu1Mg1Sn1.ICSD_628345    | metal      | metal     |
| Cu1Mg1Y1.ICSD_163695     | metal      | metal     |
| Cu1Mg2.ICSD_103047       | metal      | metal     |
| Cu1Mn1O2.ICSD_158960     | insulator  | metal     |
| Cu1Mn1O3S1Sr2.ICSD_91199 | metal      | insulator |
| Cu1Mn1O4V1.ICSD_170136   | insulator  | insulator |
| Cu1Mn1P1.ICSD_72411      | metal      | metal     |
| Cu1Mn1Sb1.ICSD_53311     | metal      | metal     |
| Cu1Mn2O4.ICSD_174000     | metal      | metal     |
| Cu1Mn2Sb1.ICSD_184950    | metal      | metal     |
| Cu1Mn3N1.ICSD_53306      | metal      | metal     |
| Cu1Mn3N1.ICSD_628356     | metal      | metal     |
| Cu1Mo1O6Sr2.ICSD_186038  | metal      | insulator |

Supplementary Table 325. Five-fold cross validated predictions for the metal/insulator classification (317/598).

| system                  | calculated | predicted |
|-------------------------|------------|-----------|
| Cu1Mo6S8.ICSD_628433    | metal      | metal     |
| Cu1Mo6Se8.ICSD_628449   | metal      | metal     |
| Cu1N1Ni3.ICSD_183372    | metal      | metal     |
| Cu1N1.ICSD_161756       | metal      | metal     |
| Cu1N2O6.ICSD_28477      | insulator  | insulator |
| Cu1N2Ta1.ICSD_71136     | insulator  | metal     |
| Cu1N3.ICSD_30633        | insulator  | insulator |
| Cu1N6O12Pb1Rb2.ICSD_372 | metal      | metal     |
| Cu1N6O12Pb1Ti2.ICSD_16  | metal      | metal     |
| Cu1N6.ICSD_24340        | metal      | insulator |
| Cu1Na1O1.ICSD_15099     | insulator  | insulator |
| Cu1Na1O1.ICSD_188528    | metal      | metal     |
| Cu1Na1O2.ICSD_80561     | insulator  | insulator |
| Cu1Na1O4P1.ICSD_35451   | insulator  | insulator |
| Cu1Na1O4P1.ICSD_73398   | metal      | insulator |
| Cu1Na1S3Ti1.ICSD_73886  | insulator  | insulator |
| Cu1Na1S3Zr1.ICSD_73887  | insulator  | insulator |
| Cu1Na1Se1.ICSD_12155    | insulator  | insulator |
| Cu1Na1Se3Zr1.ICSD_73888 | insulator  | insulator |
| Cu1Na1Te1.ICSD_12156    | insulator  | insulator |
| Cu1Na1Te3Zr1.ICSD_73889 | metal      | insulator |
| Cu1Na2O2.ICSD_422751    | insulator  | insulator |
| Cu1Na2O7P2.ICSD_80418   | insulator  | insulator |
| Cu1Na2P1.ICSD_1153      | insulator  | insulator |
| Cu1Na5O2S1.ICSD_412977  | insulator  | insulator |
| Cu1Nb1O3.ICSD_201899    | insulator  | insulator |
| Cu1Nb1Rb2S4.ICSD_84304  | insulator  | insulator |
| Cu1Nb1Rb2Se4.ICSD_84305 | insulator  | insulator |
| Cu1Nb1Te2.ICSD_414338   | metal      | metal     |
| Cu1Nb2S4.ICSD_628465    | metal      | metal     |
| Cu1Nb3Te4.ICSD_628496   | metal      | metal     |
| Cu1Nb4Si1.ICSD_628492   | metal      | metal     |
| Cu1Nd1O1S1.ICSD_96346   | insulator  | metal     |
| Cu1Nd1O1Te1.ICSD_416523 | metal      | insulator |
| Cu1Nd1O2.ICSD_83052     | metal      | insulator |
| Cu1Nd1O8W2.ICSD_40381   | insulator  | insulator |
| Cu1Nd1S2.ICSD_51405     | insulator  | insulator |
| Cu1Nd1Sb2.ICSD_93155    | metal      | metal     |
| Cu1Nd1Se2.ICSD_95827    | insulator  | insulator |
| Cu1Nd1Si1.ICSD_30762    | metal      | metal     |
| Cu1Nd1Sn1.ICSD_151169   | metal      | metal     |
| Cu1Nd1Sn1.ICSD_601011   | metal      | metal     |
| Cu1Nd1Sn1.ICSD_628539   | metal      | metal     |
| Cu1Nd1.ICSD_246591      | metal      | metal     |
| Cu1Nd1.ICSD_628504      | metal      | metal     |
| Cu1Nd2O4.ICSD_202885    | metal      | metal     |
| Cu1Nd2O4.ICSD_86754     | metal      | metal     |
| Cu1Nd2Rb1S4.ICSD_93678  | insulator  | insulator |
| Cu1Nd3S7Si1.ICSD_156275 | insulator  | insulator |
| Cu1Nd3S7Sn1.ICSD_155938 | insulator  | insulator |

Supplementary Table 326. Five-fold cross validated predictions for the metal/insulator classification (318/598).

| system                   | calculated | predicted |
|--------------------------|------------|-----------|
| Cu1Nd3Se7Si1_ICSD_628529 | insulator  | insulator |
| Cu1Nd3Se7Sn1_ICSD_152548 | insulator  | insulator |
| Cu1Ni1S3Sb1_ICSD_628553  | insulator  | insulator |
| Cu1Ni1Sb2_ICSD_57210     | metal      | metal     |
| Cu1Ni2Sb1_ICSD_53320     | metal      | metal     |
| Cu1Ni2Sn1_ICSD_103068    | metal      | metal     |
| Cu1Ni2Ti1_ICSD_628580    | metal      | metal     |
| Cu1O1P1Th1_ICSD_182311   | metal      | metal     |
| Cu1O1P1U1_ICSD_79579     | metal      | metal     |
| Cu1O1Pr1S1_ICSD_96345    | metal      | insulator |
| Cu1O1Rb1_ICSD_15100      | insulator  | insulator |
| Cu1O1Rb1_ICSD_188523     | insulator  | insulator |
| Cu1O1Rb1_ICSD_188530     | metal      | metal     |
| Cu1O1_ICSD_61323         | metal      | metal     |
| Cu1O1_ICSD_92367         | metal      | metal     |
| Cu1O2Pr1_ICSD_246822     | insulator  | metal     |
| Cu1O2Rb1_ICSD_15096      | insulator  | insulator |
| Cu1O2Rh1_ICSD_29214      | insulator  | insulator |
| Cu1O2Sc1_ICSD_151929     | insulator  | insulator |
| Cu1O2Sc1_ICSD_55689      | insulator  | insulator |
| Cu1O2Sr1_ICSD_202992     | metal      | metal     |
| Cu1O2Y1_ICSD_60848       | insulator  | insulator |
| Cu1O2Y1_ICSD_95673       | insulator  | insulator |
| Cu1O2_ICSD_150886        | metal      | metal     |
| Cu1O2_ICSD_54126         | metal      | metal     |
| Cu1O2_ICSD_89236         | metal      | metal     |
| Cu1O2_ICSD_96699         | metal      | metal     |
| Cu1O3Se1_ICSD_29506      | insulator  | insulator |
| Cu1O3Se1_ICSD_498        | insulator  | insulator |
| Cu1O3Sr2_ICSD_151811     | metal      | metal     |
| Cu1O3Ta1_ICSD_164934     | insulator  | insulator |
| Cu1O3Te1_ICSD_202451     | metal      | insulator |
| Cu1O3V1_ICSD_19046       | insulator  | insulator |
| Cu1O3V1_ICSD_9414        | insulator  | insulator |
| Cu1O4P1Rb1_ICSD_89904    | metal      | insulator |
| Cu1O4P1Ti1_ICSD_50457    | insulator  | insulator |
| Cu1O4Pr2_ICSD_202884     | metal      | metal     |
| Cu1O4Pr2_ICSD_91072      | metal      | metal     |
| Cu1O4Pr2_ICSD_91073      | metal      | metal     |
| Cu1O4Rh2_ICSD_23486      | metal      | metal     |
| Cu1O4Rh2_ICSD_88962      | metal      | metal     |
| Cu1O4S1_ICSD_71017       | insulator  | insulator |
| Cu1O4Se1_ICSD_109073     | insulator  | insulator |
| Cu1O4U1_ICSD_36071       | insulator  | insulator |
| Cu1O4W1_ICSD_169005      | metal      | insulator |
| Cu1O4W1_ICSD_4189        | metal      | insulator |
| Cu1O5Se2_ICSD_603        | insulator  | insulator |
| Cu1O5Sr2Ti1_ICSD_86427   | metal      | metal     |
| Cu1O5Te2_ICSD_2542       | insulator  | insulator |
| Cu1O6Os1Sr2_ICSD_245819  | metal      | metal     |

Supplementary Table 327. Five-fold cross validated predictions for the metal/insulator classification (319/598).

| system                   | calculated | predicted |
|--------------------------|------------|-----------|
| Cu1O6Pt1Sr3_ICSD_66347   | insulator  | insulator |
| Cu1O6Rh1Sr3_ICSD_51800   | insulator  | metal     |
| Cu1O6S2Ti2_ICSD_2896     | insulator  | insulator |
| Cu1O6Sb2_ICSD_30410      | metal      | insulator |
| Cu1O6Sb2_ICSD_628623     | metal      | insulator |
| Cu1O6Sb2_ICSD_84789      | insulator  | insulator |
| Cu1O6Se2Sr1_ICSD_202389  | insulator  | insulator |
| Cu1O6Sr2Te1_ICSD_88702   | insulator  | insulator |
| Cu1O6Sr2W1_ICSD_33571    | insulator  | insulator |
| Cu1O6Ta2_ICSD_83367      | insulator  | insulator |
| Cu1O6Te1Ti4_ICSD_187561  | insulator  | insulator |
| Cu1O6V2_ICSD_21067       | insulator  | insulator |
| Cu1O6V2_ICSD_28151       | insulator  | insulator |
| Cu1O7Rb4Si2_ICSD_85405   | insulator  | insulator |
| Cu1O7Si2Sr2_ICSD_86842   | insulator  | insulator |
| Cu1O7Sr1Te2_ICSD_261937  | metal      | insulator |
| Cu1O7Sr1V2_ICSD_39620    | insulator  | insulator |
| Cu1O8P2Sr2_ICSD_51714    | insulator  | insulator |
| Cu1O8Tb1W2_ICSD_74943    | insulator  | insulator |
| Cu1O8W2Y1_ICSD_36622     | insulator  | insulator |
| Cu1P1Si1Zr1_ICSD_59594   | metal      | metal     |
| Cu1P1Sr1_ICSD_53323      | insulator  | metal     |
| Cu1P1Zr4_ICSD_108398     | metal      | metal     |
| Cu1P2U1_ICSD_40763       | metal      | metal     |
| Cu1P2Y1_ICSD_95177       | metal      | metal     |
| Cu1P2_ICSD_35282         | insulator  | insulator |
| Cu1Pb1Pr1_ICSD_628687    | metal      | metal     |
| Cu1Pb1S3Y1_ICSD_152555   | insulator  | insulator |
| Cu1Pb1Se3Tb1_ICSD_152516 | insulator  | insulator |
| Cu1Pb1Se3Yb1_ICSD_152521 | metal      | insulator |
| Cu1Pb1Tb1_ICSD_107282    | metal      | metal     |
| Cu1Pb1Tm1_ICSD_107285    | metal      | metal     |
| Cu1Pb1Y1_ICSD_107004     | metal      | metal     |
| Cu1Pb1Yb1_ICSD_628692    | metal      | metal     |
| Cu1Pd1Rb1Se5_ICSD_281424 | insulator  | insulator |
| Cu1Pd1_ICSD_181913       | metal      | metal     |
| Cu1Pr1S2_ICSD_95829      | insulator  | insulator |
| Cu1Pr1Sb2_ICSD_93153     | metal      | metal     |
| Cu1Pr1Se2_ICSD_99677     | insulator  | insulator |
| Cu1Pr1Se3Sr1_ICSD_414181 | insulator  | insulator |
| Cu1Pr1Si1_ICSD_30761     | metal      | metal     |
| Cu1Pr1Sn1_ICSD_628741    | metal      | metal     |
| Cu1Pr1Sn2_ICSD_628742    | metal      | metal     |
| Cu1Pr1_ICSD_628710       | metal      | metal     |
| Cu1Pr3S7Si1_ICSD_628722  | insulator  | insulator |
| Cu1Pr3S7Sn1_ICSD_155939  | insulator  | insulator |
| Cu1Pr3Se7Si1_ICSD_156283 | insulator  | insulator |
| Cu1Pt1_ICSD_107118       | metal      | metal     |
| Cu1Pt7_ICSD_108775       | metal      | metal     |
| Cu1Rb1S3U1_ICSD_249704   | insulator  | insulator |

Supplementary Table 328. Five-fold cross validated predictions for the metal/insulator classification (320/598).

| system                   | calculated | predicted |
|--------------------------|------------|-----------|
| Cu1Rb1Se4.ICSD_404225    | insulator  | insulator |
| Cu1Rb2S4Ta1.ICSD_414271  | insulator  | insulator |
| Cu1Rb2S4V1.ICSD_84302    | insulator  | insulator |
| Cu1Rb2Se4Ta1.ICSD_414272 | insulator  | insulator |
| Cu1Rh2S4.ICSD_41900      | metal      | metal     |
| Cu1Rh2S4.ICSD_628767     | metal      | metal     |
| Cu1Rh2Se4.ICSD_628775    | metal      | metal     |
| Cu1Rh2Sn1.ICSD_103092    | metal      | metal     |
| Cu1S1.ICSD_24586         | metal      | metal     |
| Cu1S1.ICSD_32105         | metal      | metal     |
| Cu1S1.ICSD_63328         | metal      | metal     |
| Cu1S2Sb1.ICSD_628829     | insulator  | insulator |
| Cu1S2Sc1.ICSD_15298      | insulator  | insulator |
| Cu1S2Tb1.ICSD_415490     | insulator  | insulator |
| Cu1S2Tl1.ICSD_628931     | metal      | insulator |
| Cu1S2Tm1.ICSD_172850     | metal      | metal     |
| Cu1S2Tm1.ICSD_628936     | metal      | metal     |
| Cu1S2Y1.ICSD_152553      | insulator  | insulator |
| Cu1S2Y1.ICSD_92458       | insulator  | insulator |
| Cu1S2Yb1.ICSD_152805     | metal      | metal     |
| Cu1S2Yb1.ICSD_172851     | metal      | metal     |
| Cu1S2.ICSD_628781        | metal      | metal     |
| Cu1S2.ICSD_628782        | metal      | metal     |
| Cu1S2.ICSD_628791        | metal      | metal     |
| Cu1S3Ta1.ICSD_187747     | insulator  | insulator |
| Cu1S3Tl1Zr1.ICSD_82560   | insulator  | insulator |
| Cu1S4Ti2.ICSD_170228     | metal      | metal     |
| Cu1S4Ti2.ICSD_628916     | metal      | metal     |
| Cu1S4V2.ICSD_10035       | metal      | metal     |
| Cu1S4Zr2.ICSD_27027      | metal      | metal     |
| Cu1S7Si1Tb3.ICSD_156278  | insulator  | insulator |
| Cu1S7Si1Y3.ICSD_152792   | insulator  | insulator |
| Cu1S7Sn1Tb3.ICSD_155942  | insulator  | insulator |
| Cu1S7Sn1Y3.ICSD_152554   | insulator  | insulator |
| Cu1Sb1Se2.ICSD_30358     | insulator  | insulator |
| Cu1Sb1Sr1.ICSD_53339     | metal      | metal     |
| Cu1Sb1Yb1.ICSD_57021     | metal      | metal     |
| Cu1Sb1Yb1.ICSD_83982     | metal      | metal     |
| Cu1Sb2Tb1.ICSD_658231    | metal      | metal     |
| Cu1Sb2Ti5.ICSD_159248    | metal      | metal     |
| Cu1Sb2U1.ICSD_656842     | metal      | metal     |
| Cu1Sb2Y1.ICSD_658224     | metal      | metal     |
| Cu1Sb2Yb1.ICSD_658236    | metal      | metal     |
| Cu1Sb3Ti2.ICSD_93241     | metal      | metal     |
| Cu1Sb3Zr2.ICSD_93242     | metal      | metal     |
| Cu1Sc1Si1.ICSD_86391     | metal      | metal     |
| Cu1Sc1Si1.ICSD_86392     | metal      | metal     |
| Cu1Sc1Sn1.ICSD_416543    | metal      | metal     |
| Cu1Sc1Sn1.ICSD_629024    | metal      | metal     |
| Cu1Sc1.ICSD_103095       | metal      | metal     |

Supplementary Table 329. Five-fold cross validated predictions for the metal/insulator classification (321/598).

| system                   | calculated | predicted |
|--------------------------|------------|-----------|
| Cu1Se1.ICSD_94678        | metal      | metal     |
| Cu1Se1.ICSD_94685        | metal      | metal     |
| Cu1Se1.ICSD_94686        | metal      | metal     |
| Cu1Se2Tb1.ICSD_157555    | insulator  | insulator |
| Cu1Se2Tl1.ICSD_28743     | metal      | metal     |
| Cu1Se2.ICSD_629033       | metal      | metal     |
| Cu1Se2.ICSD_629046       | metal      | metal     |
| Cu1Se3Th1Tl1.ICSD_262810 | insulator  | insulator |
| Cu1Se3Tl1Zr1.ICSD_82561  | insulator  | insulator |
| Cu1Se7Si1Tb3.ICSD_629074 | insulator  | insulator |
| Cu1Se7Si1Y3.ICSD_152793  | insulator  | insulator |
| Cu1Se7Sn1Tb3.ICSD_152551 | insulator  | insulator |
| Cu1Si1Tb1.ICSD_629188    | metal      | metal     |
| Cu1Si1Ti1.ICSD_629204    | metal      | metal     |
| Cu1Si1Tm1.ICSD_30769     | metal      | metal     |
| Cu1Si1Y1.ICSD_30772      | metal      | metal     |
| Cu1Si1Yb1.ICSD_30770     | metal      | metal     |
| Cu1Si1Zr1.ICSD_629245    | metal      | metal     |
| Cu1Si2Zr1.ICSD_629236    | metal      | metal     |
| Cu1Sn1Tb1.ICSD_601004    | metal      | metal     |
| Cu1Sn1Ti1.ICSD_54657     | metal      | metal     |
| Cu1Sn1U1.ICSD_629297     | metal      | metal     |
| Cu1Sn1Y1.ICSD_416544     | metal      | metal     |
| Cu1Sn1Y1.ICSD_600998     | metal      | metal     |
| Cu1Sn1.ICSD_629278       | metal      | metal     |
| Cu1Sn2Sr1.ICSD_103110    | metal      | metal     |
| Cu1Sn3Zr5.ICSD_656297    | metal      | metal     |
| Cu1Sr1.ICSD_247133       | metal      | metal     |
| Cu1Tb1.ICSD_629319       | metal      | metal     |
| Cu1Te1.ICSD_93966        | metal      | metal     |
| Cu1Te2.ICSD_629329       | metal      | metal     |
| Cu1Te3Ti1Tl1.ICSD_81571  | insulator  | insulator |
| Cu1Te3Ti4.ICSD_629347    | metal      | metal     |
| Cu1Th2.ICSD_103121       | metal      | metal     |
| Cu1Th2.ICSD_150501       | metal      | metal     |
| Cu1Ti1.ICSD_103127       | metal      | metal     |
| Cu1Ti1.ICSD_103128       | metal      | metal     |
| Cu1Ti1.ICSD_600100       | metal      | metal     |
| Cu1Ti1.ICSD_629389       | metal      | metal     |
| Cu1Ti2.ICSD_15807        | metal      | metal     |
| Cu1Ti2.ICSD_629399       | metal      | metal     |
| Cu1Ti3.ICSD_103130       | metal      | metal     |
| Cu1Tm1.ICSD_629415       | metal      | metal     |
| Cu1Tm1.ICSD_629417       | metal      | metal     |
| Cu1Y1.ICSD_185943        | metal      | metal     |
| Cu1Y1.ICSD_629426        | metal      | metal     |
| Cu1Yb1.ICSD_629442       | metal      | metal     |
| Cu1Zn1.ICSD_629462       | metal      | metal     |
| Cu1Zr1.ICSD_103163       | metal      | metal     |
| Cu1Zr1.ICSD_167596       | metal      | metal     |

Supplementary Table 330. Five-fold cross validated predictions for the metal/insulator classification (322/598).

| system                    | calculated | predicted |
|---------------------------|------------|-----------|
| Cu1Zr1.ICSD.167598        | metal      | metal     |
| Cu1Zr2.ICSD.151845        | metal      | metal     |
| Cu1Zr2.ICSD.151846        | metal      | metal     |
| Cu1Zr3.ICSD.629481        | metal      | metal     |
| Cu1.ICSD.183263           | metal      | metal     |
| Cu1.ICSD.627117           | metal      | metal     |
| Cu23Dy6.ICSD.627129       | metal      | metal     |
| Cu23Lu6.ICSD.628304       | metal      | metal     |
| Cu23Tb6.ICSD.629317       | metal      | metal     |
| Cu23Yb6.ICSD.629447       | metal      | metal     |
| Cu2Dy1Ge2.ICSD.627141     | metal      | metal     |
| Cu2Dy1In1.ICSD.102877     | metal      | metal     |
| Cu2Dy1In3.ICSD.108369     | metal      | metal     |
| Cu2Dy1S2.ICSD.627162      | metal      | metal     |
| Cu2Dy1Si2.ICSD.627185     | metal      | metal     |
| Cu2Dy1.ICSD.627121        | metal      | metal     |
| Cu2Dy2In1.ICSD.627148     | metal      | metal     |
| Cu2Er1Ge2.ICSD.53251      | metal      | metal     |
| Cu2Er1In1.ICSD.102885     | metal      | metal     |
| Cu2Er1Si2.ICSD.165439     | metal      | metal     |
| Cu2Er1.ICSD.627200        | metal      | metal     |
| Cu2Er2In1.ICSD.627222     | metal      | metal     |
| Cu2Eu1Ge2.ICSD.87255      | metal      | metal     |
| Cu2Eu1K1Te4.ICSD.280193   | metal      | insulator |
| Cu2Eu1S4Sn1.ICSD.419600   | insulator  | insulator |
| Cu2Eu1Sb2.ICSD.77197      | metal      | metal     |
| Cu2Eu1Si2.ICSD.627287     | metal      | metal     |
| Cu2Eu1Sn2.ICSD.182050     | metal      | metal     |
| Cu2Eu1.ICSD.627266        | metal      | metal     |
| Cu2Eu3P4Zn2.ICSD.89516    | metal      | metal     |
| Cu2F6Hg2S1.ICSD.156367    | metal      | insulator |
| Cu2Fe1Ge1S4.ICSD.627304   | insulator  | insulator |
| Cu2Fe1Ge1Se4.ICSD.627313  | insulator  | insulator |
| Cu2Fe1S2.ICSD.171909      | insulator  | metal     |
| Cu2Fe1S2.ICSD.171910      | metal      | metal     |
| Cu2Fe1S4Si1.ICSD.627355   | insulator  | insulator |
| Cu2Fe1S4Sn1.ICSD.627358   | insulator  | insulator |
| Cu2Fe1S4Sn1.ICSD.90827    | metal      | insulator |
| Cu2Fe1Se4Si1.ICSD.627368  | insulator  | insulator |
| Cu2Fe1Se4Sn1.ICSD.627369  | metal      | metal     |
| Cu2Fe1Sn1.ICSD.151206     | metal      | metal     |
| Cu2Fe4S7.ICSD.15973       | insulator  | metal     |
| Cu2Ga1Sc1.ICSD.102930     | metal      | metal     |
| Cu2Ga1Sr1.ICSD.102938     | metal      | metal     |
| Cu2Gd1Ge2.ICSD.106854     | metal      | metal     |
| Cu2Gd1In1.ICSD.102953     | metal      | metal     |
| Cu2Gd1In1.ICSD.627620     | metal      | metal     |
| Cu2Gd1O8Ru1Sr2.ICSD.85244 | metal      | metal     |
| Cu2Gd1Si2.ICSD.164072     | metal      | metal     |
| Cu2Gd1Si2.ICSD.627655     | metal      | metal     |

Supplementary Table 331. Five-fold cross validated predictions for the metal/insulator classification (323/598).

| system                     | calculated | predicted |
|----------------------------|------------|-----------|
| Cu2Ge1Hg1S4.ICSD.152762    | insulator  | insulator |
| Cu2Ge1Hg1S4.ICSD.187020    | insulator  | insulator |
| Cu2Ge1Hg1Se4.ICSD.152761   | metal      | metal     |
| Cu2Ge1Hg1Te4.ICSD.656155   | metal      | metal     |
| Cu2Ge1Li1.ICSD.15129       | metal      | metal     |
| Cu2Ge1Mg1S4.ICSD.425555    | insulator  | insulator |
| Cu2Ge1Mn1S4.ICSD.627735    | insulator  | insulator |
| Cu2Ge1Mn1Se4.ICSD.627741   | insulator  | insulator |
| Cu2Ge1O4.ICSD.100796       | metal      | insulator |
| Cu2Ge1S3.ICSD.627779       | metal      | metal     |
| Cu2Ge1S3.ICSD.85138        | insulator  | metal     |
| Cu2Ge1S4Sr1.ICSD.10005     | insulator  | insulator |
| Cu2Ge1S4Zn1.ICSD.152752    | insulator  | insulator |
| Cu2Ge1S4Zn1.ICSD.627793    | insulator  | insulator |
| Cu2Ge1Se3.ICSD.160386      | metal      | metal     |
| Cu2Ge1Se4Sr1.ICSD.411406   | insulator  | insulator |
| Cu2Ge1Se4Zn1.ICSD.627831   | metal      | metal     |
| Cu2Ge1Te3.ICSD.151872      | metal      | metal     |
| Cu2Ge1Te4Zn1.ICSD.152751   | metal      | metal     |
| Cu2Ge2Ho1.ICSD.627700      | metal      | metal     |
| Cu2Ge2La1.ICSD.81756       | metal      | metal     |
| Cu2Ge2Nd1.ICSD.152916      | metal      | metal     |
| Cu2Ge2Pr1.ICSD.152911      | metal      | metal     |
| Cu2Ge2Sr1.ICSD.424224      | metal      | metal     |
| Cu2Ge2Tb1.ICSD.169355      | metal      | metal     |
| Cu2Ge2Th1.ICSD.55344       | metal      | metal     |
| Cu2Ge2U1.ICSD.85998        | metal      | metal     |
| Cu2Ge2Y1.ICSD.52764        | metal      | metal     |
| Cu2Ge2Yb1.ICSD.424225      | metal      | metal     |
| Cu2H12N8O10.ICSD.281342    | insulator  | insulator |
| Cu2H14O18S2Zn3.ICSD.404835 | metal      | insulator |
| Cu2H1K3O14P4.ICSD.62742    | insulator  | insulator |
| Cu2H1O5P1.ICSD.39679       | insulator  | insulator |
| Cu2H3N1O6.ICSD.31353       | metal      | insulator |
| Cu2H4Na2O13Si4.ICSD.414048 | insulator  | insulator |
| Cu2Hf1In1.ICSD.54594       | metal      | metal     |
| Cu2Hf1P2.ICSD.53287        | metal      | metal     |
| Cu2Hf1Te3.ICSD.41072       | insulator  | insulator |
| Cu2Hf3Se8Ti2.ICSD.81554    | insulator  | insulator |
| Cu2Hg1I4.ICSD.30265        | insulator  | insulator |
| Cu2Hg1I4.ICSD.79679        | insulator  | insulator |
| Cu2Hg1S4Si1.ICSD.627928    | insulator  | insulator |
| Cu2Hg1S4Sn1.ICSD.627929    | metal      | metal     |
| Cu2Hg1Se4Si1.ICSD.627935   | insulator  | insulator |
| Cu2Hg1Se4Sn1.ICSD.262976   | metal      | metal     |
| Cu2Hg1Si1Te4.ICSD.656152   | metal      | insulator |
| Cu2Hg1Sn1Te4.ICSD.656158   | metal      | metal     |
| Cu2Ho1In1.ICSD.102979      | metal      | metal     |
| Cu2Ho1S2.ICSD.627961       | metal      | metal     |
| Cu2Ho1Si2.ICSD.53290       | metal      | metal     |

Supplementary Table 332. Five-fold cross validated predictions for the metal/insulator classification (324/598).

| system                   | calculated | predicted |
|--------------------------|------------|-----------|
| Cu2Ho1_ICSD_627942       | metal      | metal     |
| Cu2Ho2In1_ICSD_627951    | metal      | metal     |
| Cu2I3Rb1_ICSD_65250      | insulator  | insulator |
| Cu2I6Tl4_ICSD_65962      | insulator  | insulator |
| Cu2In1La1_ICSD_106404    | metal      | metal     |
| Cu2In1La2_ICSD_411708    | metal      | metal     |
| Cu2In1Lu1_ICSD_102993    | metal      | metal     |
| Cu2In1Mn1_ICSD_102996    | metal      | metal     |
| Cu2In1Nd1_ICSD_103004    | metal      | metal     |
| Cu2In1Pr1_ICSD_106558    | metal      | metal     |
| Cu2In1Sc1_ICSD_103009    | metal      | metal     |
| Cu2In1Tb1_ICSD_152556    | metal      | metal     |
| Cu2In1Tb2_ICSD_628133    | metal      | metal     |
| Cu2In1Ti1_ICSD_103020    | metal      | metal     |
| Cu2In1Tm1_ICSD_103022    | metal      | metal     |
| Cu2In1Y1_ICSD_103023     | metal      | metal     |
| Cu2In1Y2_ICSD_628177     | metal      | metal     |
| Cu2In1Yb2_ICSD_107315    | metal      | metal     |
| Cu2In1Zr1_ICSD_103026    | metal      | metal     |
| Cu2In1_ICSD_180111       | metal      | metal     |
| Cu2In2S6Si1_ICSD_157375  | insulator  | insulator |
| Cu2K1S4V1_ICSD_402924    | insulator  | insulator |
| Cu2K1Se2_ICSD_98403      | metal      | metal     |
| Cu2K1Se4Ta1_ICSD_73957   | insulator  | insulator |
| Cu2K1Se4V1_ICSD_280059   | insulator  | insulator |
| Cu2K2S4Th1_ICSD_170865   | insulator  | insulator |
| Cu2K2Te5_ICSD_280533     | metal      | insulator |
| Cu2K3O4_ICSD_380487      | insulator  | insulator |
| Cu2La1Mg1_ICSD_155984    | metal      | metal     |
| Cu2La1Si2_ICSD_106841    | metal      | metal     |
| Cu2La1Sn2_ICSD_602618    | metal      | metal     |
| Cu2La1_ICSD_103028       | metal      | metal     |
| Cu2La2Mg1_ICSD_411709    | metal      | metal     |
| Cu2La2O5_ICSD_73399      | metal      | metal     |
| Cu2La6S14Si2_ICSD_23519  | insulator  | insulator |
| Cu2Li1O2_ICSD_71221      | metal      | insulator |
| Cu2Li1P1_ICSD_628282     | metal      | metal     |
| Cu2Li1P2Tb1_ICSD_35589   | metal      | metal     |
| Cu2Li1P2Y1_ICSD_628287   | metal      | metal     |
| Cu2Li1P2Yb1_ICSD_628288  | metal      | metal     |
| Cu2Li1P2_ICSD_247090     | metal      | metal     |
| Cu2Li1Si1_ICSD_15128     | metal      | metal     |
| Cu2Li1Sn1_ICSD_150602    | metal      | metal     |
| Cu2Li2O6Te1_ICSD_189655  | insulator  | insulator |
| Cu2Li3O4_ICSD_66509      | metal      | insulator |
| Cu2Lu1Si2_ICSD_106846    | metal      | metal     |
| Cu2Lu1Sn2_ICSD_603428    | metal      | metal     |
| Cu2Mg1Nd2_ICSD_411710    | metal      | metal     |
| Cu2Mg1O3_ICSD_4202       | metal      | insulator |
| Cu2Mg1Se4Si1_ICSD_425556 | insulator  | insulator |

Supplementary Table 333. Five-fold cross validated predictions for the metal/insulator classification (325/598).

| system                    | calculated | predicted |
|---------------------------|------------|-----------|
| Cu2Mg1Y2_ICSD_411711      | metal      | metal     |
| Cu2Mg1_ICSD_174171        | metal      | metal     |
| Cu2Mn1O2S2Sr2_ICSD_84734  | metal      | metal     |
| Cu2Mn1S4Si1_ICSD_628375   | insulator  | insulator |
| Cu2Mn1S4Sn1_ICSD_628379   | metal      | insulator |
| Cu2Mn1Sb1_ICSD_53312      | metal      | metal     |
| Cu2Mn1Se4Si1_ICSD_628396  | insulator  | insulator |
| Cu2Mn1Se4Sn1_ICSD_155904  | metal      | metal     |
| Cu2Mn1Sn1_ICSD_628408     | metal      | metal     |
| Cu2Mn3O8_ICSD_971         | metal      | insulator |
| Cu2Mo1O7Se1_ICSD_249957   | insulator  | insulator |
| Cu2N12O24Ti5Y1_ICSD_24549 | metal      | metal     |
| Cu2Na1O2_ICSD_169713      | insulator  | insulator |
| Cu2Na2O11Si4_ICSD_240930  | insulator  | insulator |
| Cu2Na2O6Te1_ICSD_170637   | insulator  | insulator |
| Cu2Na2S4Zr1_ICSD_79536    | metal      | insulator |
| Cu2Na3O6Sb1_ICSD_153037   | insulator  | insulator |
| Cu2Nb6S8_ICSD_628469      | metal      | metal     |
| Cu2Nd1Si2_ICSD_164070     | metal      | metal     |
| Cu2Nd1_ICSD_628499        | metal      | metal     |
| Cu2Nd1_ICSD_656902        | metal      | metal     |
| Cu2Ni1O2S2Sr2_ICSD_88424  | metal      | metal     |
| Cu2Ni1Sn1_ICSD_151208     | metal      | metal     |
| Cu2Ni1Zn1_ICSD_103079     | metal      | metal     |
| Cu2O10P2U1_ICSD_59598     | insulator  | insulator |
| Cu2O1Ti4_ICSD_73017       | metal      | metal     |
| Cu2O1_ICSD_180846         | insulator  | metal     |
| Cu2O2Pb1_ICSD_400657      | insulator  | insulator |
| Cu2O2S2Sr2Zn1_ICSD_84735  | insulator  | metal     |
| Cu2O2Sr1_ICSD_25002       | insulator  | metal     |
| Cu2O2Th1_ICSD_36535       | insulator  | insulator |
| Cu2O3Sr1_ICSD_416903      | metal      | metal     |
| Cu2O3Sr1_ICSD_99042       | metal      | metal     |
| Cu2O3Sr2_ICSD_68676       | metal      | insulator |
| Cu2O4P1_ICSD_80181        | insulator  | insulator |
| Cu2O4S1_ICSD_40452        | insulator  | insulator |
| Cu2O4Se1_ICSD_60652       | insulator  | insulator |
| Cu2O4Se1_ICSD_60653       | insulator  | insulator |
| Cu2O4W1_ICSD_202669       | insulator  | insulator |
| Cu2O4W1_ICSD_62058        | insulator  | insulator |
| Cu2O5S1_ICSD_34649        | insulator  | insulator |
| Cu2O7P2_ICSD_157107       | insulator  | insulator |
| Cu2O7P2_ICSD_27436        | insulator  | insulator |
| Cu2O7Sr2Th1Y1_ICSD_74164  | metal      | metal     |
| Cu2O7V2_ICSD_164189       | insulator  | insulator |
| Cu2O7V2_ICSD_171028       | insulator  | insulator |
| Cu2O7V2_ICSD_1831         | insulator  | insulator |
| Cu2O7V2_ICSD_34756        | insulator  | insulator |
| Cu2O8Te3_ICSD_50704       | insulator  | insulator |
| Cu2P2Th1_ICSD_100270      | metal      | metal     |

Supplementary Table 334. Five-fold cross validated predictions for the metal/insulator classification (326/598).

| system                   | calculated | predicted |
|--------------------------|------------|-----------|
| Cu2P2U1.ICSD.601802      | metal      | metal     |
| Cu2P2Zr1.ICSD.35585      | metal      | metal     |
| Cu2P7.ICSD.35281         | insulator  | insulator |
| Cu2Pb1S4Si1.ICSD.152763  | insulator  | insulator |
| Cu2Pr1Si2.ICSD.106876    | metal      | metal     |
| Cu2Pr1Si2.ICSD.53325     | metal      | metal     |
| Cu2Pr1Sn2.ICSD.628744    | metal      | metal     |
| Cu2Pr1.ICSD.628707       | metal      | metal     |
| Cu2Pu1Si2.ICSD.602699    | metal      | metal     |
| Cu2Rb1S4V1.ICSD.280516   | insulator  | insulator |
| Cu2Rb2S4Sn1.ICSD.74020   | insulator  | insulator |
| Cu2Rb2S4Ti1.ICSD.280644  | insulator  | insulator |
| Cu2S13U6.ICSD.61417      | insulator  | insulator |
| Cu2S1.ICSD.16550         | insulator  | metal     |
| Cu2S1.ICSD.20560         | metal      | metal     |
| Cu2S1.ICSD.628818        | metal      | metal     |
| Cu2S2Tb1.ICSD.628910     | metal      | metal     |
| Cu2S2Ti1.ICSD.40495      | metal      | metal     |
| Cu2S2Y1.ICSD.628962      | metal      | insulator |
| Cu2S2Yb1.ICSD.628970     | insulator  | metal     |
| Cu2S3Si1.ICSD.24132      | metal      | insulator |
| Cu2S3Si1.ICSD.70057      | insulator  | metal     |
| Cu2S3Si1.ICSD.88235      | insulator  | metal     |
| Cu2S3Sn1.ICSD.107606     | metal      | metal     |
| Cu2S4Si1Zn1.ICSD.628869  | insulator  | insulator |
| Cu2S4Sn1Sr1.ICSD.356     | insulator  | insulator |
| Cu2S4Sn1Sr1.ICSD.43131   | insulator  | insulator |
| Cu2S4Sn1Zn1.ICSD.184478  | metal      | metal     |
| Cu2S4Sn1Zn1.ICSD.185597  | metal      | insulator |
| Cu2S4Sn1Zn1.ICSD.628895  | insulator  | metal     |
| Cu2S4W1.ICSD.72529       | insulator  | insulator |
| Cu2S4W1.ICSD.98909       | insulator  | insulator |
| Cu2S7U3.ICSD.82155       | insulator  | insulator |
| Cu2Sb1.ICSD.412295       | metal      | metal     |
| Cu2Sc1Si2.ICSD.60379     | metal      | metal     |
| Cu2Sc1.ICSD.629012       | metal      | metal     |
| Cu2Se1.ICSD.30230        | metal      | metal     |
| Cu2Se1.ICSD.56025        | metal      | metal     |
| Cu2Se2Ti1.ICSD.601713    | metal      | metal     |
| Cu2Se3Si1.ICSD.88236     | insulator  | insulator |
| Cu2Se3Sn1.ICSD.97966     | metal      | metal     |
| Cu2Se4Si1Zn1.ICSD.629079 | insulator  | insulator |
| Cu2Se4Sn1Zn1.ICSD.184474 | metal      | metal     |
| Cu2Se4Sn1Zn1.ICSD.189278 | metal      | metal     |
| Cu2Se7U3.ICSD.82156      | insulator  | insulator |
| Cu2Si1Te4Zn1.ICSD.656150 | insulator  | metal     |
| Cu2Si2Sr1.ICSD.25313     | metal      | metal     |
| Cu2Si2Tb1.ICSD.55784     | metal      | metal     |
| Cu2Si2Th1.ICSD.629199    | metal      | metal     |
| Cu2Si2Tm1.ICSD.53349     | metal      | metal     |

Supplementary Table 335. Five-fold cross validated predictions for the metal/insulator classification (327/598).

| system                    | calculated | predicted |
|---------------------------|------------|-----------|
| Cu2Si2U1.ICSD.629218      | metal      | metal     |
| Cu2Si2Y1.ICSD.164066      | metal      | metal     |
| Cu2Si2Yb1.ICSD.164078     | metal      | metal     |
| Cu2Sn1Te3.ICSD.160882     | metal      | metal     |
| Cu2Sn1Te4Zn1.ICSD.629293  | metal      | metal     |
| Cu2Sn1U1.ICSD.657423      | metal      | metal     |
| Cu2Sn2Sr1.ICSD.182102     | metal      | metal     |
| Cu2Sn2U1.ICSD.602654      | metal      | metal     |
| Cu2Sn2Y1.ICSD.603426      | metal      | metal     |
| Cu2Sn5Yb4.ICSD.409510     | metal      | metal     |
| Cu2Tb1.ICSD.241220        | metal      | metal     |
| Cu2Te1.ICSD.655706        | metal      | metal     |
| Cu2Te2Ti1.ICSD.629346     | metal      | metal     |
| Cu2Te3Ti1.ICSD.402631     | insulator  | insulator |
| Cu2Te3Zr1.ICSD.56463      | insulator  | insulator |
| Cu2Th1.ICSD.15442         | metal      | metal     |
| Cu2Y1.ICSD.604016         | metal      | metal     |
| Cu2Yb1.ICSD.103147        | metal      | metal     |
| Cu2Yb1.ICSD.629448        | metal      | metal     |
| Cu2Zn1Zr1.ICSD.103161     | metal      | metal     |
| Cu3Dy1Ga2.ICSD.108368     | metal      | metal     |
| Cu3Dy1Mn4O12.ICSD.153871  | metal      | metal     |
| Cu3Dy1O8Pb2Sr2.ICSD.71483 | metal      | metal     |
| Cu3Dy3Sb4.ICSD.658643     | insulator  | insulator |
| Cu3Er1O8Pb2Sr2.ICSD.71485 | metal      | metal     |
| Cu3Er1Te3.ICSD.154741     | insulator  | insulator |
| Cu3Er2K1Se5.ICSD.174372   | insulator  | insulator |
| Cu3Er2Rb1S5.ICSD.93682    | insulator  | insulator |
| Cu3Er2Rb1Se5.ICSD.96686   | insulator  | insulator |
| Cu3Er3Sb4.ICSD.658645     | insulator  | insulator |
| Cu3Eu1Mn4O12.ICSD.153869  | metal      | metal     |
| Cu3Eu1O8Pb2Sr2.ICSD.71481 | metal      | metal     |
| Cu3F4H2O2.ICSD.98699      | insulator  | insulator |
| Cu3F7Na1.ICSD.202587      | insulator  | insulator |
| Cu3Fe4La1O12.ICSD.185583  | metal      | metal     |
| Cu3Fe4O12Sr1.ICSD.262857  | metal      | metal     |
| Cu3Ga8V2.ICSD.416815      | metal      | metal     |
| Cu3Ga8W2.ICSD.416814      | metal      | metal     |
| Cu3Gd1Mn4O12.ICSD.153870  | insulator  | metal     |
| Cu3Gd1O8Pb2Sr2.ICSD.71482 | metal      | metal     |
| Cu3Gd3Sb4.ICSD.658641     | insulator  | insulator |
| Cu3Ge1.ICSD.53266         | metal      | metal     |
| Cu3Ge1.ICSD.627687        | metal      | metal     |
| Cu3Ge4Na2O12.ICSD.171630  | metal      | insulator |
| Cu3Ge5K2O14.ICSD.410828   | insulator  | insulator |
| Cu3H6O11V2.ICSD.68994     | metal      | insulator |
| Cu3Ho1Mn4O12.ICSD.153872  | metal      | metal     |
| Cu3Ho1O8Pb2Sr2.ICSD.71484 | metal      | metal     |
| Cu3Ho2K1Se5.ICSD.174371   | insulator  | insulator |
| Cu3Ho2Rb1S5.ICSD.59858    | insulator  | insulator |

Supplementary Table 336. Five-fold cross validated predictions for the metal/insulator classification (328/598).

| system                    | calculated | predicted |
|---------------------------|------------|-----------|
| Cu3Ho3Sb4.ICSD_658644     | insulator  | insulator |
| Cu3I2O4Sr2.ICSD_55711     | metal      | metal     |
| Cu3In2O16P4.ICSD_411872   | metal      | insulator |
| Cu3K1S2.ICSD_100001       | insulator  | insulator |
| Cu3K1Te2.ICSD_100830      | insulator  | metal     |
| Cu3K2O12Se4.ICSD_50541    | insulator  | insulator |
| Cu3K3P2.ICSD_12163        | insulator  | insulator |
| Cu3La1O12Ru4.ICSD_51897   | metal      | metal     |
| Cu3La3Sb4.ICSD_658637     | metal      | metal     |
| Cu3Lu1Mn4O12.ICSD_180106  | metal      | metal     |
| Cu3Mg2Si1.ICSD_53304      | metal      | metal     |
| Cu3Mn4O12Pr1.ICSD_153867  | metal      | metal     |
| Cu3Mn4O12Th1.ICSD_34316   | metal      | metal     |
| Cu3Mn4O12Tm1.ICSD_153873  | metal      | metal     |
| Cu3Mn4O12Y1.ICSD_38418    | metal      | metal     |
| Cu3Mn4O12Yb1.ICSD_153874  | metal      | metal     |
| Cu3N1Pd0.25.ICSD_180239   | metal      | metal     |
| Cu3N1.ICSD_167838         | insulator  | metal     |
| Cu3N1.ICSD_180236         | metal      | metal     |
| Cu3N1.ICSD_180237         | metal      | metal     |
| Cu3N1.ICSD_55222          | metal      | metal     |
| Cu3N5Sr6.ICSD_83962       | insulator  | insulator |
| Cu3Na1O12Ru4.ICSD_95716   | metal      | metal     |
| Cu3Na1Te2.ICSD_60860      | metal      | metal     |
| Cu3Nb1S4.ICSD_183994      | insulator  | insulator |
| Cu3Nb1Se4.ICSD_628485     | insulator  | insulator |
| Cu3Nb1Te4.ICSD_628495     | insulator  | insulator |
| Cu3Nd1O12Ru4.ICSD_51896   | metal      | metal     |
| Cu3Nd1O8Pb2Sr2.ICSD_71479 | metal      | metal     |
| Cu3Nd3Sb4.ICSD_57207      | metal      | metal     |
| Cu3Nd3Sb4.ICSD_658635     | metal      | metal     |
| Cu3O12Pb1Sn4.ICSD_162102  | insulator  | insulator |
| Cu3O12Ru4Sr1.ICSD_51895   | metal      | metal     |
| Cu3O12Sn4Sr1.ICSD_162101  | insulator  | insulator |
| Cu3O1Ti3.ICSD_29056       | metal      | metal     |
| Cu3O2S2Sr2.ICSD_88423     | metal      | metal     |
| Cu3O4V1.ICSD_418372       | insulator  | insulator |
| Cu3O5Sr2.ICSD_416904      | metal      | metal     |
| Cu3O6Te1.ICSD_189131      | insulator  | insulator |
| Cu3O6W1.ICSD_15001        | insulator  | insulator |
| Cu3O8Pb2Sr2Y1.ICSD_74154  | metal      | metal     |
| Cu3O8V2.ICSD_27184        | insulator  | insulator |
| Cu3O8V2.ICSD_27310        | insulator  | insulator |
| Cu3P1S4.ICSD_412240       | insulator  | insulator |
| Cu3P1Se4.ICSD_95412       | insulator  | insulator |
| Cu3P1.ICSD_16247          | metal      | metal     |
| Cu3P1.ICSD_26775          | metal      | metal     |
| Cu3P1.ICSD_628628         | metal      | metal     |
| Cu3Pd1.ICSD_103083        | metal      | metal     |
| Cu3Pd1.ICSD_103084        | metal      | metal     |

Supplementary Table 337. Five-fold cross validated predictions for the metal/insulator classification (329/598).

| system                  | calculated | predicted |
|-------------------------|------------|-----------|
| Cu3Pd1.ICSD_103086      | metal      | metal     |
| Cu3Pd1.ICSD_107169      | metal      | metal     |
| Cu3Pr3Sb4.ICSD_658639   | metal      | metal     |
| Cu3Pt1.ICSD_628749      | metal      | metal     |
| Cu3Rb1S2.ICSD_409646    | insulator  | insulator |
| Cu3S2Ti1.ICSD_23290     | insulator  | insulator |
| Cu3S3Sb1.ICSD_403113    | insulator  | insulator |
| Cu3S3Sb1.ICSD_53332     | metal      | metal     |
| Cu3S4Sb1.ICSD_30368     | metal      | metal     |
| Cu3S4Sb1.ICSD_42672     | metal      | insulator |
| Cu3S4Sb1.ICSD_42673     | metal      | metal     |
| Cu3S4Ta1.ICSD_183995    | insulator  | insulator |
| Cu3S4V1.ICSD_15490      | insulator  | insulator |
| Cu3S8Ta2Ti3.ICSD_406210 | insulator  | insulator |
| Cu3Sb1Se3.ICSD_401095   | insulator  | insulator |
| Cu3Sb1Se4.ICSD_628993   | metal      | metal     |
| Cu3Sb1.ICSD_53337       | metal      | metal     |
| Cu3Sb1.ICSD_628990      | metal      | metal     |
| Cu3Sb4Tb3.ICSD_658642   | insulator  | insulator |
| Cu3Sb4U3.ICSD_657096    | metal      | metal     |
| Cu3Sb4Y3.ICSD_658636    | insulator  | metal     |
| Cu3Se2Ti1.ICSD_629126   | insulator  | metal     |
| Cu3Se2.ICSD_239         | metal      | metal     |
| Cu3Se4Ta1.ICSD_108406   | insulator  | insulator |
| Cu3Se4V1.ICSD_629148    | insulator  | insulator |
| Cu3Sn1.ICSD_103103      | metal      | metal     |
| Cu3Sn1.ICSD_162569      | metal      | metal     |
| Cu3Sn1.ICSD_629268      | metal      | metal     |
| Cu3Sn4U3.ICSD_629298    | metal      | metal     |
| Cu3Ta1Te4.ICSD_629308   | insulator  | insulator |
| Cu3Te4V1.ICSD_629351    | insulator  | insulator |
| Cu3Ti1.ICSD_600128      | metal      | metal     |
| Cu3Ti2.ICSD_629380      | metal      | metal     |
| Cu4Dy1In1.ICSD_627150   | metal      | metal     |
| Cu4Dy3Ge4.ICSD_627142   | metal      | metal     |
| Cu4Dy3Si4.ICSD_55837    | metal      | metal     |
| Cu4Dy3Sn4.ICSD_604589   | metal      | metal     |
| Cu4Dy4K2S9.ICSD_97562   | insulator  | insulator |
| Cu4Dy4K2Se9.ICSD_174374 | insulator  | insulator |
| Cu4Er1Pd1.ICSD_627234   | metal      | metal     |
| Cu4Er3Ge4.ICSD_98338    | metal      | metal     |
| Cu4Er3Si4.ICSD_55650    | metal      | metal     |
| Cu4Er3Sn4.ICSD_604569   | metal      | metal     |
| Cu4Eu1Sn2.ICSD_416796   | metal      | metal     |
| Cu4Gd1In1.ICSD_627611   | metal      | metal     |
| Cu4Ge2Hf3.ICSD_53269    | metal      | metal     |
| Cu4Ge2Ni1S7.ICSD_627755 | metal      | insulator |
| Cu4Ge2Zr3.ICSD_53286    | metal      | metal     |
| Cu4Ge4Ho3.ICSD_98336    | metal      | metal     |
| Cu4Ge4Sc3.ICSD_604581   | metal      | metal     |

Supplementary Table 338. Five-fold cross validated predictions for the metal/insulator classification (330/598).

| system                      | calculated | predicted |
|-----------------------------|------------|-----------|
| Cu4Ge4Tb3.ICSD.98331        | metal      | metal     |
| Cu4Ge4Y3.ICSD.627876        | metal      | metal     |
| Cu4Ge4Yb3.ICSD.627879       | metal      | metal     |
| Cu4Hf3Si2.ICSD.53288        | metal      | metal     |
| Cu4Hf3Si4.ICSD.87201        | metal      | metal     |
| Cu4Ho3Si4.ICSD.627979       | metal      | metal     |
| Cu4Ho3Sn4.ICSD.627987       | metal      | metal     |
| Cu4Ho4K2S9.ICSD.97563       | insulator  | insulator |
| Cu4In1Mg1.ICSD.628018       | metal      | metal     |
| Cu4In1Mn1.ICSD.424277       | metal      | metal     |
| Cu4In1Sc1.ICSD.416528       | metal      | metal     |
| Cu4In1Tb1.ICSD.152559       | metal      | metal     |
| Cu4In1Y1.ICSD.628179        | metal      | metal     |
| Cu4In1Yb1.ICSD.628189       | metal      | metal     |
| Cu4In9Se16.ICSD.53295       | metal      | insulator |
| Cu4K1S3.ICSD.23336          | metal      | metal     |
| Cu4K1Sb2.ICSD.602179        | metal      | metal     |
| Cu4K1Se3.ICSD.280072        | metal      | metal     |
| Cu4K2Se9Y4.ICSD.174375      | insulator  | insulator |
| Cu4Mg1Sn1.ICSD.108141       | metal      | metal     |
| Cu4Mg1Y1.ICSD.163696        | metal      | metal     |
| Cu4Mn1Sn1.ICSD.628407       | metal      | metal     |
| Cu4Mo6Se8.ICSD.171431       | metal      | metal     |
| Cu4Na1O12Te2Tl3.ICSD.421466 | insulator  | insulator |
| Cu4Na1S4.ICSD.81306         | metal      | metal     |
| Cu4Na1Sb2.ICSD.59206        | metal      | metal     |
| Cu4Na2S3.ICSD.100829        | insulator  | metal     |
| Cu4Na3S4.ICSD.10004         | metal      | insulator |
| Cu4Nb5Si4.ICSD.25756        | metal      | metal     |
| Cu4Ni1S7Si2.ICSD.100778     | insulator  | insulator |
| Cu4Ni1Yb1.ICSD.628598       | metal      | metal     |
| Cu4O3.ICSD.100566           | metal      | metal     |
| Cu4P8Si1.ICSD.78967         | insulator  | insulator |
| Cu4Pd1U1.ICSD.658161        | metal      | metal     |
| Cu4Pd1Yb1.ICSD.628704       | metal      | metal     |
| Cu4Pd1.ICSD.103087          | metal      | metal     |
| Cu4Rb1S3.ICSD.628758        | metal      | metal     |
| Cu4Rb1Se3.ICSD.628760       | metal      | metal     |
| Cu4S3Tl1.ICSD.32607         | metal      | metal     |
| Cu4S4Sn1.ICSD.833           | metal      | insulator |
| Cu4S4Ti1.ICSD.82558         | insulator  | metal     |
| Cu4Sc1Sn1.ICSD.629023       | metal      | metal     |
| Cu4Sc3Si4.ICSD.629021       | metal      | metal     |
| Cu4Se3Tl1.ICSD.629128       | metal      | metal     |
| Cu4Si2Zr3.ICSD.26260        | metal      | metal     |
| Cu4Si4Tb3.ICSD.629185       | metal      | metal     |
| Cu4Si4Y3.ICSD.629226        | metal      | metal     |
| Cu4Si4Yb3.ICSD.629232       | metal      | metal     |
| Cu4Si4Zr3.ICSD.87200        | metal      | metal     |
| Cu4Sn2Sr1.ICSD.422455       | metal      | metal     |

Supplementary Table 339. Five-fold cross validated predictions for the metal/insulator classification (331/598).

| system                   | calculated | predicted |
|--------------------------|------------|-----------|
| Cu4Sn4Tb3.ICSD.162827    | metal      | metal     |
| Cu4Sn4Y3.ICSD.604582     | metal      | metal     |
| Cu4Ti1.ICSD.629401       | metal      | metal     |
| Cu5Dy1.ICSD.102875       | metal      | metal     |
| Cu5Er1.ICSD.627207       | metal      | metal     |
| Cu5Eu1.ICSD.627265       | metal      | metal     |
| Cu5Gd1.ICSD.102950       | metal      | metal     |
| Cu5Gd1.ICSD.627590       | metal      | metal     |
| Cu5Gd1.ICSD.659698       | metal      | metal     |
| Cu5H4O12V2.ICSD.54831    | insulator  | insulator |
| Cu5Ho1.ICSD.102978       | metal      | metal     |
| Cu5Ho1.ICSD.604234       | metal      | metal     |
| Cu5In1Th1.ICSD.107268    | metal      | metal     |
| Cu5K1O13V3.ICSD.400802   | insulator  | insulator |
| Cu5K2Te5.ICSD.71204      | metal      | insulator |
| Cu5La1.ICSD.628218       | metal      | metal     |
| Cu5Li2O14Si4.ICSD.2409   | insulator  | insulator |
| Cu5Lu1.ICSD.103045       | metal      | metal     |
| Cu5Na1S3.ICSD.61514      | metal      | insulator |
| Cu5Na2O14Si4.ICSD.416179 | insulator  | insulator |
| Cu5Na8O10.ICSD.415349    | insulator  | insulator |
| Cu5Nd1.ICSD.659711       | metal      | metal     |
| Cu5O10P2.ICSD.1292       | insulator  | insulator |
| Cu5O4Rb3.ICSD.35246      | insulator  | insulator |
| Cu5Pr1.ICSD.103088       | metal      | metal     |
| Cu5S7Si2.ICSD.628848     | metal      | insulator |
| Cu5Sn1Th1.ICSD.107269    | metal      | metal     |
| Cu5Sn1U1.ICSD.54541      | metal      | metal     |
| Cu5Sn4.ICSD.187904       | metal      | metal     |
| Cu5Sr1.ICSD.103113       | metal      | metal     |
| Cu5Tb1.ICSD.108415       | metal      | metal     |
| Cu5Tb1.ICSD.629316       | metal      | metal     |
| Cu5Tm1.ICSD.103140       | metal      | metal     |
| Cu5U1.ICSD.629421        | metal      | metal     |
| Cu5Y1.ICSD.629436        | metal      | metal     |
| Cu5Yb1.ICSD.103149       | metal      | metal     |
| Cu5Zn8.ICSD.103158       | metal      | metal     |
| Cu5Zr1.ICSD.103165       | metal      | metal     |
| Cu6Fe2S8Sn1.ICSD.40047   | metal      | insulator |
| Cu6Ga21Li13.ICSD.106534  | metal      | metal     |
| Cu6Ga5Mg2.ICSD.240092    | metal      | metal     |
| Cu6Gd1.ICSD.163977       | metal      | metal     |
| Cu6La1.ICSD.103032       | metal      | metal     |
| Cu6La1.ICSD.103033       | metal      | metal     |
| Cu6La4Mn1S10.ICSD.96415  | insulator  | insulator |
| Cu6Nd1.ICSD.150110       | metal      | metal     |
| Cu6Nd1.ICSD.628509       | metal      | metal     |
| Cu6O10Sr4.ICSD.50089     | metal      | metal     |
| Cu6O8Pb1.ICSD.27585      | metal      | insulator |
| Cu6O8Pb1.ICSD.280596     | insulator  | metal     |

Supplementary Table 340. Five-fold cross validated predictions for the metal/insulator classification (332/598).

| system                 | calculated | predicted |
|------------------------|------------|-----------|
| Cu6Pr1_ICSD_628709     | metal      | metal     |
| Cu6Pu1_ICSD_628756     | metal      | metal     |
| Cu6Sn5Yb3_ICSD_413485  | metal      | metal     |
| Cu6Sn5_ICSD_158248     | metal      | metal     |
| Cu6Th1_ICSD_103125     | metal      | metal     |
| Cu7Hf6Zn16_ICSD_627923 | metal      | metal     |
| Cu7P1S6_ICSD_628639    | insulator  | insulator |
| Cu7P1Se6_ICSD_628648   | insulator  | insulator |
| Cu7S4_ICSD_16011       | metal      | insulator |
| Cu7Te4_ICSD_629337     | metal      | metal     |
| Cu7Zn16Zr6_ICSD_629468 | metal      | metal     |
| Cu8Ge8Nd6_ICSD_83190   | metal      | metal     |
| Cu8Hf3_ICSD_396        | metal      | metal     |
| Cu8K3S6_ICSD_10054     | metal      | metal     |
| Cu8K3Se6_ICSD_85728    | metal      | metal     |
| Cu8O1_ICSD_62764       | metal      | metal     |
| Cu8Rb3S6_ICSD_10055    | metal      | metal     |
| Cu8Rb3Se6_ICSD_14011   | metal      | metal     |
| Cu8S6Si1_ICSD_24374    | insulator  | metal     |
| Cu9Dy1Mg2_ICSD_245216  | metal      | metal     |
| Cu9Fe9S16_ICSD_2649    | metal      | metal     |
| Cu9Ga4_ICSD_627389     | metal      | metal     |
| Cu9Ge4Sr1_ICSD_412884  | metal      | metal     |
| Cu9Ho1Mg2_ICSD_245217  | metal      | metal     |
| Cu9In4_ICSD_187898     | metal      | metal     |
| Cu9La1Mg2_ICSD_245209  | metal      | metal     |
| Cu9Mg2Nd1_ICSD_245212  | metal      | metal     |
| Cu9Mg2Pr1_ICSD_245211  | metal      | metal     |
| Cu9Mg2Tb1_ICSD_416327  | metal      | metal     |
| Cu9Mg2Y1_ICSD_245208   | metal      | metal     |
| Cu9Mg2Yb1_ICSD_245218  | metal      | metal     |
| Cu9Nd1Sn4_ICSD_107250  | metal      | metal     |
| Cu9S5_ICSD_41263       | metal      | metal     |
| Cu9Si4Sr1_ICSD_412882  | metal      | metal     |
| Cu9Sn4Sr1_ICSD_422456  | metal      | metal     |
| Cu9Sn4Yb1_ICSD_154446  | metal      | metal     |
| Dy11Sn10_ICSD_103372   | metal      | metal     |
| Dy12Fe32O2_ICSD_9639   | metal      | metal     |
| Dy1F1O1_ICSD_184010    | insulator  | insulator |
| Dy1Fe1O3_ICSD_280091   | insulator  | insulator |
| Dy1Fe1Si1_ICSD_629664  | metal      | metal     |
| Dy1Fe2Ge2_ICSD_103175  | metal      | metal     |
| Dy1Fe2Si2_ICSD_629657  | metal      | metal     |
| Dy1Fe2_ICSD_629613     | metal      | metal     |
| Dy1Fe3_ICSD_629569     | metal      | metal     |
| Dy1Fe3_ICSD_629573     | metal      | metal     |
| Dy1Fe3_ICSD_629588     | metal      | metal     |
| Dy1Fe4Ge2_ICSD_154830  | metal      | metal     |
| Dy1Fe4Ge2_ICSD_154831  | metal      | metal     |
| Dy1Fe4Si2_ICSD_247480  | metal      | metal     |

Supplementary Table 341. Five-fold cross validated predictions for the metal/insulator classification (333/598).

| system                  | calculated | predicted |
|-------------------------|------------|-----------|
| Dy1Fe5_ICSD_103173      | metal      | metal     |
| Dy1Fe6Ge6_ICSD_656771   | metal      | metal     |
| Dy1Fe6Sn6_ICSD_151163   | metal      | metal     |
| Dy1Ga1Ni1_ICSD_629716   | metal      | metal     |
| Dy1Ga1Pd1_ICSD_629728   | metal      | metal     |
| Dy1Ga1Pd2_ICSD_656966   | metal      | metal     |
| Dy1Ga1Pt1_ICSD_629731   | metal      | metal     |
| Dy1Ga1Zn1_ICSD_629739   | metal      | metal     |
| Dy1Ga1_ICSD_103184      | metal      | metal     |
| Dy1Ga2Ni1_ICSD_629726   | metal      | metal     |
| Dy1Ga2Pd1_ICSD_600150   | metal      | metal     |
| Dy1Ga2_ICSD_657002      | metal      | metal     |
| Dy1Ga3Ni2_ICSD_106968   | metal      | metal     |
| Dy1Ga3Ru1_ICSD_629734   | metal      | metal     |
| Dy1Ga3_ICSD_103187      | metal      | metal     |
| Dy1Ga3_ICSD_629703      | metal      | metal     |
| Dy1Ga3_ICSD_629704      | metal      | metal     |
| Dy1Ga4Ni1_ICSD_423065   | metal      | metal     |
| Dy1Ge1Ir1_ICSD_88165    | metal      | metal     |
| Dy1Ge1Li1_ICSD_601244   | metal      | metal     |
| Dy1Ge1Mn1_ICSD_97794    | metal      | metal     |
| Dy1Ge1Ni1_ICSD_657256   | metal      | metal     |
| Dy1Ge1Pd1_ICSD_391464   | metal      | metal     |
| Dy1Ge1Pt1_ICSD_90294    | metal      | metal     |
| Dy1Ge1Rh1_ICSD_629803   | metal      | metal     |
| Dy1Ge1Ru1_ICSD_85914    | metal      | metal     |
| Dy1Ge1Sn1_ICSD_261753   | metal      | metal     |
| Dy1Ge1Ti1_ICSD_85907    | metal      | metal     |
| Dy1Ge1Ti1_ICSD_93644    | metal      | metal     |
| Dy1Ge1_ICSD_53360       | metal      | metal     |
| Dy1Ge2Ir1_ICSD_600505   | metal      | metal     |
| Dy1Ge2Mn2_ICSD_629783   | metal      | metal     |
| Dy1Ge2Ni1_ICSD_658575   | metal      | metal     |
| Dy1Ge2Ni2_ICSD_629792   | metal      | metal     |
| Dy1Ge2Pd2_ICSD_53363    | metal      | metal     |
| Dy1Ge2Pt1_ICSD_66977    | metal      | metal     |
| Dy1Ge2Pt2_ICSD_53364    | metal      | metal     |
| Dy1Ge2Pt2_ICSD_629802   | metal      | metal     |
| Dy1Ge2Rh2_ICSD_55930    | metal      | metal     |
| Dy1Ge2Ru2_ICSD_55931    | metal      | metal     |
| Dy1Ge6Mn6_ICSD_57228    | metal      | metal     |
| Dy1H2_ICSD_629826       | metal      | metal     |
| Dy1H3O3_ICSD_200095     | insulator  | insulator |
| Dy1H3_ICSD_629827       | metal      | insulator |
| Dy1H4K1O9P2_ICSD_167522 | insulator  | insulator |
| Dy1Hg1_ICSD_629835      | metal      | metal     |
| Dy1Hg2_ICSD_103196      | metal      | metal     |
| Dy1Hg2_ICSD_629834      | metal      | metal     |
| Dy1Hg3_ICSD_629833      | metal      | metal     |
| Dy1I1S1_ICSD_79107      | insulator  | insulator |

Supplementary Table 342. Five-fold cross validated predictions for the metal/insulator classification (334/598).

| system                  | calculated | predicted |
|-------------------------|------------|-----------|
| Dy1In1Ir1.ICSD.414472   | metal      | metal     |
| Dy1In1Mg1.ICSD.55102    | metal      | metal     |
| Dy1In1Ni1.ICSD.629861   | metal      | metal     |
| Dy1In1Pd1.ICSD.629863   | metal      | metal     |
| Dy1In1Pd2.ICSD.103207   | metal      | metal     |
| Dy1In1Pt1.ICSD.154892   | metal      | metal     |
| Dy1In1Pt2.ICSD.629865   | metal      | metal     |
| Dy1In1Pt4.ICSD.629864   | metal      | metal     |
| Dy1In1Rh1.ICSD.103209   | metal      | metal     |
| Dy1In1Zn1.ICSD.629871   | metal      | metal     |
| Dy1In1.ICSD.103201      | metal      | metal     |
| Dy1In2Ni1.ICSD.629858   | metal      | metal     |
| Dy1In2Ni9.ICSD.600171   | metal      | metal     |
| Dy1In3.ICSD.629856      | metal      | metal     |
| Dy1In5Rh1.ICSD.155804   | metal      | metal     |
| Dy1Ir1Si1.ICSD.93218    | metal      | metal     |
| Dy1Ir1Si3.ICSD.629884   | metal      | metal     |
| Dy1Ir2Si2.ICSD.57230    | metal      | metal     |
| Dy1Ir2Si2.ICSD.629888   | metal      | metal     |
| Dy1Ir2.ICSD.629882      | metal      | metal     |
| Dy1Ir3.ICSD.103213      | metal      | metal     |
| Dy1K1S2.ICSD.44946      | insulator  | insulator |
| Dy1Li1O12P4.ICSD.260001 | insulator  | insulator |
| Dy1Li1O2.ICSD.422562    | insulator  | insulator |
| Dy1Li1O2.ICSD.45512     | insulator  | insulator |
| Dy1Li1S2.ICSD.44958     | insulator  | insulator |
| Dy1Li1Se2.ICSD.44964    | insulator  | insulator |
| Dy1Li1Sn1.ICSD.603144   | metal      | metal     |
| Dy1Li1Sn2.ICSD.629904   | metal      | metal     |
| Dy1Mg1Pd1.ICSD.657929   | metal      | metal     |
| Dy1Mg1Sn1.ICSD.183524   | metal      | metal     |
| Dy1Mg1.ICSD.629912      | metal      | metal     |
| Dy1Mg2.ICSD.656103      | metal      | metal     |
| Dy1Mg3.ICSD.656104      | metal      | metal     |
| Dy1Mn12.ICSD.26824      | metal      | metal     |
| Dy1Mn1O3.ICSD.157396    | metal      | insulator |
| Dy1Mn1O3.ICSD.91711     | insulator  | metal     |
| Dy1Mn1Si1.ICSD.88061    | metal      | metal     |
| Dy1Mn2O5.ICSD.18308     | insulator  | insulator |
| Dy1Mn2Si2.ICSD.629944   | metal      | metal     |
| Dy1Mn2.ICSD.163470      | metal      | metal     |
| Dy1Mn2.ICSD.602151      | metal      | metal     |
| Dy1Mo6S8.ICSD.629953    | metal      | metal     |
| Dy1Mo6Se8.ICSD.629954   | metal      | metal     |
| Dy1N1.ICSD.629962       | insulator  | metal     |
| Dy1Na1S2.ICSD.629966    | insulator  | insulator |
| Dy1Na1Se2.ICSD.629969   | insulator  | insulator |
| Dy1Ni10Si2.ICSD.97036   | metal      | metal     |
| Dy1Ni1P1.ICSD.630012    | metal      | metal     |
| Dy1Ni1Sb1.ICSD.103339   | insulator  | insulator |

Supplementary Table 343. Five-fold cross validated predictions for the metal/insulator classification (335/598).

| system                 | calculated | predicted |
|------------------------|------------|-----------|
| Dy1Ni1Sb2.ICSD.658215  | metal      | metal     |
| Dy1Ni1Si2.ICSD.85839   | metal      | metal     |
| Dy1Ni1Sn1.ICSD.103340  | metal      | metal     |
| Dy1Ni1Zn1.ICSD.656586  | metal      | metal     |
| Dy1Ni1.ICSD.109242     | metal      | metal     |
| Dy1Ni2P2.ICSD.88184    | metal      | metal     |
| Dy1Ni2Sb2.ICSD.630016  | metal      | metal     |
| Dy1Ni2Si2.ICSD.630029  | metal      | metal     |
| Dy1Ni2.ICSD.629995     | metal      | metal     |
| Dy1Ni3.ICSD.629980     | metal      | metal     |
| Dy1Ni3.ICSD.630007     | metal      | metal     |
| Dy1Ni4P2.ICSD.601112   | metal      | metal     |
| Dy1Ni5.ICSD.629994     | metal      | metal     |
| Dy1O14P5.ICSD.240973   | insulator  | insulator |
| Dy1O19Ta7.ICSD.203232  | insulator  | insulator |
| Dy1O1P1Zn1.ICSD.418526 | insulator  | insulator |
| Dy1O2Rb1.ICSD.15159    | insulator  | insulator |
| Dy1O4P1.ICSD.79756     | insulator  | insulator |
| Dy1O4Ta1.ICSD.415435   | insulator  | insulator |
| Dy1O4V1.ICSD.247716    | insulator  | insulator |
| Dy1O4V1.ICSD.37365     | insulator  | insulator |
| Dy1O6Re1Sr2.ICSD.25402 | metal      | metal     |
| Dy1O6Rh1Sr3.ICSD.51055 | insulator  | insulator |
| Dy1O8Rb1S2.ICSD.20896  | insulator  | insulator |
| Dy1O8Rb1W2.ICSD.22361  | insulator  | insulator |
| Dy1O9P3.ICSD.416844    | insulator  | insulator |
| Dy1Os2Si2.ICSD.630053  | metal      | metal     |
| Dy1Os2.ICSD.630052     | metal      | metal     |
| Dy1P1Pt1.ICSD.53373    | metal      | metal     |
| Dy1P1S1.ICSD.630062    | insulator  | insulator |
| Dy1P1.ICSD.187519      | metal      | metal     |
| Dy1P1.ICSD.630056      | metal      | metal     |
| Dy1P2Pt8.ICSD.418227   | metal      | metal     |
| Dy1P2Ru2.ICSD.602101   | metal      | metal     |
| Dy1P5.ICSD.409184      | insulator  | metal     |
| Dy1Pb1Pd1.ICSD.657945  | metal      | metal     |
| Dy1Pb3.ICSD.630066     | metal      | metal     |
| Dy1Pd1Sb1.ICSD.415945  | metal      | metal     |
| Dy1Pd1Sb1.ICSD.630088  | metal      | metal     |
| Dy1Pd1Sn1.ICSD.103348  | metal      | metal     |
| Dy1Pd1Th1.ICSD.103353  | metal      | metal     |
| Dy1Pd1Zn1.ICSD.183341  | metal      | metal     |
| Dy1Pd1.ICSD.106595     | metal      | metal     |
| Dy1Pd1.ICSD.630079     | metal      | metal     |
| Dy1Pd2Si1.ICSD.630089  | metal      | metal     |
| Dy1Pd2Si2.ICSD.71250   | metal      | metal     |
| Dy1Pd2Sn1.ICSD.103349  | metal      | metal     |
| Dy1Pd3.ICSD.103344     | metal      | metal     |
| Dy1Pt1Sb1.ICSD.53374   | insulator  | metal     |
| Dy1Pt1Si1.ICSD.630134  | metal      | metal     |

Supplementary Table 344. Five-fold cross validated predictions for the metal/insulator classification (336/598).

| system                 | calculated | predicted |
|------------------------|------------|-----------|
| Dy1Pt1Sn1_ICSD_630137  | metal      | metal     |
| Dy1Pt1_ICSD_630123     | metal      | metal     |
| Dy1Pt2Si1_ICSD_630131  | metal      | metal     |
| Dy1Pt2Si2_ICSD_601620  | metal      | metal     |
| Dy1Pt2Si2_ICSD_604564  | metal      | metal     |
| Dy1Pt2_ICSD_103355     | metal      | metal     |
| Dy1Pt3_ICSD_103356     | metal      | metal     |
| Dy1Rb1S2_ICSD_81402    | insulator  | insulator |
| Dy1Re2_ICSD_630138     | metal      | metal     |
| Dy1Rh1Sn1_ICSD_630165  | metal      | metal     |
| Dy1Rh1Zn1_ICSD_419897  | metal      | metal     |
| Dy1Rh1_ICSD_103360     | metal      | metal     |
| Dy1Rh2Si2_ICSD_630161  | metal      | metal     |
| Dy1Rh2Zn20_ICSD_152113 | metal      | metal     |
| Dy1Rh2_ICSD_103362     | metal      | metal     |
| Dy1Rh3Si2_ICSD_103364  | metal      | metal     |
| Dy1Rh5_ICSD_103363     | metal      | metal     |
| Dy1Ru1Si1_ICSD_88065   | metal      | metal     |
| Dy1Ru2Si2_ICSD_630182  | metal      | metal     |
| Dy1Ru2Zn20_ICSD_152111 | metal      | metal     |
| Dy1Ru2_ICSD_630179     | metal      | metal     |
| Dy1S1_ICSD_57239       | metal      | metal     |
| Dy1S2Ti1_ICSD_57244    | insulator  | insulator |
| Dy1S2_ICSD_53378       | metal      | metal     |
| Dy1S2_ICSD_630195      | metal      | metal     |
| Dy1Sb1Sc1_ICSD_421440  | metal      | metal     |
| Dy1Sb1Zr1_ICSD_152640  | metal      | metal     |
| Dy1Sb1_ICSD_630240     | metal      | metal     |
| Dy1Sb2_ICSD_630230     | metal      | metal     |
| Dy1Se1_ICSD_53380      | metal      | metal     |
| Dy1Se1_ICSD_53381      | metal      | metal     |
| Dy1Se2Ti1_ICSD_106991  | insulator  | insulator |
| Dy1Se2_ICSD_630258     | metal      | metal     |
| Dy1Si1_7_ICSD_415597   | metal      | metal     |
| Dy1Si1Ti1_ICSD_88116   | metal      | metal     |
| Dy1Si1_ICSD_164012     | metal      | metal     |
| Dy1Si1_ICSD_165434     | metal      | metal     |
| Dy1Si1_ICSD_180212     | metal      | metal     |
| Dy1Si1_ICSD_180224     | metal      | metal     |
| Dy1Si1_ICSD_180225     | metal      | metal     |
| Dy1Si2_ICSD_150663     | metal      | metal     |
| Dy1Si2_ICSD_20248      | metal      | metal     |
| Dy1Sn2_ICSD_168674     | metal      | metal     |
| Dy1Sn3_ICSD_103370     | metal      | metal     |
| Dy1Tc2_ICSD_630325     | metal      | metal     |
| Dy1Te1_ICSD_43640      | metal      | metal     |
| Dy1Te2Ti1_ICSD_630345  | insulator  | insulator |
| Dy1Te2_ICSD_630332     | metal      | metal     |
| Dy1Th1_ICSD_109244     | metal      | metal     |
| Dy1Ti1Zn1_ICSD_630365  | metal      | metal     |

Supplementary Table 345. Five-fold cross validated predictions for the metal/insulator classification (337/598).

| system                   | calculated | predicted |
|--------------------------|------------|-----------|
| Dy1Ti1_ICSD_103375       | metal      | metal     |
| Dy1Ti3_ICSD_103376       | metal      | metal     |
| Dy1Zn12_ICSD_630387      | metal      | metal     |
| Dy1Zn1_ICSD_630374       | metal      | metal     |
| Dy1Zn2_ICSD_630384       | metal      | metal     |
| Dy1Zn3_ICSD_103382       | metal      | metal     |
| Dy1Zn5_ICSD_103383       | metal      | metal     |
| Dy1_ICSD_157920          | metal      | metal     |
| Dy1_ICSD_52518           | metal      | metal     |
| Dy1_ICSD_53356           | metal      | metal     |
| Dy1_ICSD_53358           | metal      | metal     |
| Dy1_ICSD_629536          | metal      | metal     |
| Dy2Fe17N3_ICSD_629636    | metal      | metal     |
| Dy2Fe17_ICSD_604297      | metal      | metal     |
| Dy2Fe3Si5_ICSD_41835     | metal      | metal     |
| Dy2Fe3Si5_ICSD_629666    | metal      | metal     |
| Dy2Ga9Ru3_ICSD_411437    | metal      | metal     |
| Dy2Ge2In1_ICSD_172492    | metal      | metal     |
| Dy2Ge2Mg1_ICSD_423452    | metal      | metal     |
| Dy2Ge3Pt9_ICSD_415206    | metal      | metal     |
| Dy2Hf2O7_ICSD_245138     | insulator  | insulator |
| Dy2In1Ni2_ICSD_629859    | metal      | metal     |
| Dy2In1Ni2_ICSD_629860    | metal      | metal     |
| Dy2In1Pd2_ICSD_658298    | metal      | metal     |
| Dy2In1_ICSD_103205       | metal      | metal     |
| Dy2Mg1Si2_ICSD_415117    | metal      | metal     |
| Dy2Mo3Si4_ICSD_600648    | metal      | metal     |
| Dy2Mo4O18Sb2_ICSD_417674 | insulator  | insulator |
| Dy2N3_ICSD_629957        | metal      | metal     |
| Dy2Ni12P7_ICSD_602458    | metal      | metal     |
| Dy2Ni17_ICSD_630000      | metal      | metal     |
| Dy2Ni3Si5_ICSD_84170     | metal      | metal     |
| Dy2Ni7_ICSD_629978       | metal      | metal     |
| Dy2O13Te5_ICSD_413664    | insulator  | insulator |
| Dy2O1S2_ICSD_36603       | insulator  | insulator |
| Dy2O1S2_ICSD_36604       | insulator  | insulator |
| Dy2O2S1_ICSD_109332      | insulator  | insulator |
| Dy2O2Te1_ICSD_89565      | insulator  | insulator |
| Dy2O3_ICSD_160213        | insulator  | insulator |
| Dy2O3_ICSD_160228        | insulator  | insulator |
| Dy2O3_ICSD_185606        | insulator  | insulator |
| Dy2O7Ru2_ICSD_78151      | insulator  | insulator |
| Dy2O7Sn2_ICSD_82960      | insulator  | insulator |
| Dy2O7Tc2_ICSD_109080     | insulator  | insulator |
| Dy2O7Ti2_ICSD_188553     | insulator  | insulator |
| Dy2O7V2_ICSD_160863      | insulator  | insulator |
| Dy2Pb1Pd2_ICSD_99196     | metal      | metal     |
| Dy2Pt1_ICSD_630109       | metal      | metal     |
| Dy2Rh1Si3_ICSD_630163    | metal      | metal     |
| Dy2Rh3Si5_ICSD_35134     | metal      | metal     |

Supplementary Table 346. Five-fold cross validated predictions for the metal/insulator classification (338/598).

| system                   | calculated | predicted |
|--------------------------|------------|-----------|
| Dy2Rh3Si5_ICSD_600471    | metal      | metal     |
| Dy2S3_ICSD_66532         | insulator  | insulator |
| Dy2S4Sr1_ICSD_630212     | insulator  | insulator |
| Dy2S4Zn1_ICSD_630225     | insulator  | insulator |
| Dy2S5Sn1_ICSD_630211     | metal      | insulator |
| Dy2Sb5_ICSD_107594       | metal      | metal     |
| Dy2Se3_ICSD_419          | insulator  | insulator |
| Dy2Se4Sr1_ICSD_630270    | insulator  | insulator |
| Dy2Si4Ti3_ICSD_96129     | metal      | metal     |
| Dy2Sn5_ICSD_160543       | metal      | metal     |
| Dy2Ti1_ICSD_103378       | metal      | metal     |
| Dy2Zn17_ICSD_103384      | metal      | metal     |
| Dy2Zn17_ICSD_630377      | metal      | metal     |
| Dy3F1O12Se4_ICSD_411748  | insulator  | insulator |
| Dy3Fe1Ga1S7_ICSD_236399  | insulator  | insulator |
| Dy3Fe1Ga1Se7_ICSD_236400 | insulator  | insulator |
| Dy3Fe2Si3_ICSD_84008     | metal      | metal     |
| Dy3Fe5O12_ICSD_23856     | insulator  | insulator |
| Dy3Ga1O6_ICSD_99495      | insulator  | insulator |
| Dy3Ga2Mn3Si1_ICSD_99076  | metal      | metal     |
| Dy3Ga2Ni6_ICSD_629715    | metal      | metal     |
| Dy3Ga5O12_ICSD_409391    | insulator  | insulator |
| Dy3Ge13Ir4_ICSD_629774   | metal      | metal     |
| Dy3Ge13Os4_ICSD_629795   | metal      | metal     |
| Dy3Ge13Rh4_ICSD_629805   | metal      | metal     |
| Dy3Ge13Ru4_ICSD_629815   | metal      | metal     |
| Dy3Ge3Ru2_ICSD_425772    | metal      | metal     |
| Dy3Ge4_ICSD_84342        | metal      | metal     |
| Dy3Ge5_ICSD_419458       | metal      | metal     |
| Dy3In1N1_ICSD_98504      | metal      | metal     |
| Dy3In1_ICSD_108423       | metal      | metal     |
| Dy3In5_ICSD_629850       | metal      | metal     |
| Dy3Ir1_ICSD_629872       | metal      | metal     |
| Dy3N1S3_ICSD_416219      | insulator  | insulator |
| Dy3N1Se3_ICSD_420156     | insulator  | insulator |
| Dy3Ni1Si2_ICSD_630021    | metal      | metal     |
| Dy3Ni1_ICSD_629977       | metal      | metal     |
| Dy3Ni2_ICSD_2334         | metal      | metal     |
| Dy3Ni6Si2_ICSD_630030    | metal      | metal     |
| Dy3O7Re1_ICSD_99254      | insulator  | insulator |
| Dy3Os1_ICSD_630049       | metal      | metal     |
| Dy3Pd2_ICSD_107682       | metal      | metal     |
| Dy3Pd4_ICSD_630078       | metal      | metal     |
| Dy3Pt1_ICSD_630113       | metal      | metal     |
| Dy3Pt4_ICSD_630122       | metal      | metal     |
| Dy3Rh1_ICSD_630158       | metal      | metal     |
| Dy3Ru1_ICSD_630178       | metal      | metal     |
| Dy3S4_ICSD_630201        | metal      | metal     |
| Dy3S7Sc2_ICSD_630205     | metal      | metal     |
| Dy3Se4_ICSD_630261       | metal      | metal     |

Supplementary Table 347. Five-fold cross validated predictions for the metal/insulator classification (339/598).

| system                   | calculated | predicted |
|--------------------------|------------|-----------|
| Dy3Ti5_ICSD_630360       | metal      | metal     |
| Dy3Zn11_ICSD_630370      | metal      | metal     |
| Dy4Fe1Ga12_ICSD_249998   | metal      | metal     |
| Dy4Ga12Ni1_ICSD_629724   | metal      | metal     |
| Dy4Ga12Pd1_ICSD_629729   | metal      | metal     |
| Dy4Ge4In1Ni2_ICSD_240335 | metal      | metal     |
| Dy4Ge6Ir7_ICSD_629773    | metal      | metal     |
| Dy4Ge6Rh7_ICSD_629804    | metal      | metal     |
| Dy4In1Rh1_ICSD_417514    | metal      | metal     |
| Dy4Mg1Rh1_ICSD_417454    | metal      | metal     |
| Dy4Ni12Sn25_ICSD_160045  | metal      | metal     |
| Dy4Sb3_ICSD_630245       | metal      | metal     |
| Dy5Ge3_ICSD_629755       | metal      | metal     |
| Dy5In4Ni2_ICSD_418923    | metal      | metal     |
| Dy5In4Pd2_ICSD_165135    | metal      | metal     |
| Dy5Ir2_ICSD_629875       | metal      | metal     |
| Dy5Ir3_ICSD_629876       | metal      | metal     |
| Dy5Ir3_ICSD_629878       | metal      | metal     |
| Dy5Ir4Si10_ICSD_629891   | metal      | metal     |
| Dy5Mg24_ICSD_109137      | metal      | metal     |
| Dy5Ni1Pb3_ICSD_152604    | metal      | metal     |
| Dy5Ni2Sb1_ICSD_81765     | metal      | metal     |
| Dy5Pb3_ICSD_103342       | metal      | metal     |
| Dy5Pt3_ICSD_630107       | metal      | metal     |
| Dy5Rh3_ICSD_630149       | metal      | metal     |
| Dy5Ru2_ICSD_103366       | metal      | metal     |
| Dy5S7_ICSD_630189        | metal      | metal     |
| Dy5Sb3_ICSD_601792       | metal      | metal     |
| Dy5Si3_ICSD_630292       | metal      | metal     |
| Dy5Sn3_ICSD_103371       | metal      | metal     |
| Dy5Ti3_ICSD_630359       | metal      | metal     |
| Dy5Ti3_ICSD_630364       | metal      | metal     |
| Dy6Fe1Sb2_ICSD_156085    | metal      | metal     |
| Dy6Fe1Sb2_ICSD_96250     | metal      | metal     |
| Dy6Fe1Te2_ICSD_91340     | metal      | metal     |
| Dy6Fe23_ICSD_629567      | metal      | metal     |
| Dy6Mn23_ICSD_629921      | metal      | metal     |
| Dy6Zn23_ICSD_630373      | metal      | metal     |
| Dy7Ir2Te2_ICSD_420220    | metal      | metal     |
| Er11Ge10_ICSD_630596     | metal      | metal     |
| Er11In6Si4_ICSD_184239   | metal      | metal     |
| Er11Sn10_ICSD_631167     | metal      | metal     |
| Er14In3Pd3_ICSD_418560   | metal      | metal     |
| Er17Ru6Te3_ICSD_391431   | metal      | metal     |
| Er1F1Mo1O4_ICSD_419253   | insulator  | insulator |
| Er1F1Na1O4P1_ICSD_94521  | insulator  | insulator |
| Er1F1O1_ICSD_184012      | insulator  | insulator |
| Er1F1O3Se1_ICSD_419954   | insulator  | insulator |
| Er1F1S1_ICSD_94476       | insulator  | insulator |
| Er1F3_ICSD_81411         | insulator  | insulator |

Supplementary Table 348. Five-fold cross validated predictions for the metal/insulator classification (340/598).

| system                 | calculated | predicted |
|------------------------|------------|-----------|
| Er1F5K2.ICSD_20404     | insulator  | insulator |
| Er1F6Na1Rb2.ICSD_23142 | insulator  | insulator |
| Er1Fe1Ge2.ICSD_630459  | metal      | metal     |
| Er1Fe2Ge2.ICSD_260818  | metal      | metal     |
| Er1Fe2O4.ICSD_67700    | metal      | metal     |
| Er1Fe2Si2.ICSD_630499  | metal      | metal     |
| Er1Fe2.ICSD_630423     | metal      | metal     |
| Er1Fe2.ICSD_630432     | metal      | metal     |
| Er1Fe3.ICSD_602052     | metal      | metal     |
| Er1Fe4Ge2.ICSD_156069  | metal      | metal     |
| Er1Fe4Ge2.ICSD_156072  | metal      | metal     |
| Er1Fe4Ge2.ICSD_85886   | metal      | metal     |
| Er1Fe6Ga6.ICSD_630453  | metal      | metal     |
| Er1Fe6Ge6.ICSD_656391  | metal      | metal     |
| Er1Ga1Ir1.ICSD_630550  | metal      | metal     |
| Er1Ga1Ni1.ICSD_630555  | metal      | metal     |
| Er1Ga1Pd1.ICSD_630568  | metal      | metal     |
| Er1Ga1Pt1.ICSD_630571  | metal      | metal     |
| Er1Ga1Rh1.ICSD_630573  | metal      | metal     |
| Er1Ga1Zn1.ICSD_261028  | metal      | metal     |
| Er1Ga1Zn1.ICSD_630581  | metal      | metal     |
| Er1Ga1.ICSD_630532     | metal      | metal     |
| Er1Ga2Ni1.ICSD_630566  | metal      | metal     |
| Er1Ga2Pd1.ICSD_600162  | metal      | metal     |
| Er1Ga2.ICSD_103230     | metal      | metal     |
| Er1Ga3Ru1.ICSD_630575  | metal      | metal     |
| Er1Ga3.ICSD_602415     | metal      | metal     |
| Er1Ga4Ni1.ICSD_423066  | metal      | metal     |
| Er1Ga4Ti2.ICSD_630579  | metal      | metal     |
| Er1Ga4V2.ICSD_103238   | metal      | metal     |
| Er1Ge1Ir1.ICSD_630615  | metal      | metal     |
| Er1Ge1Li1.ICSD_76287   | metal      | metal     |
| Er1Ge1Mn1.ICSD_97799   | metal      | metal     |
| Er1Ge1Mn1.ICSD_97800   | metal      | metal     |
| Er1Ge1Na1O4.ICSD_54199 | insulator  | insulator |
| Er1Ge1Ni1.ICSD_630636  | metal      | metal     |
| Er1Ge1Pd2.ICSD_151861  | metal      | metal     |
| Er1Ge1Pt1.ICSD_630642  | metal      | metal     |
| Er1Ge1Rh1.ICSD_86113   | metal      | metal     |
| Er1Ge1Ru1.ICSD_88190   | metal      | metal     |
| Er1Ge1Sn1.ICSD_261755  | metal      | metal     |
| Er1Ge1Ti1.ICSD_93649   | metal      | metal     |
| Er1Ge1.ICSD_630607     | metal      | metal     |
| Er1Ge2Ir1.ICSD_93338   | metal      | metal     |
| Er1Ge2Mn2.ICSD_630623  | metal      | metal     |
| Er1Ge2Ni1.ICSD_170341  | metal      | metal     |
| Er1Ge2Ni1.ICSD_658573  | metal      | metal     |
| Er1Ge2Ni2.ICSD_630635  | metal      | metal     |
| Er1Ge2Pt1.ICSD_93335   | metal      | metal     |
| Er1Ge2Rh2.ICSD_630646  | metal      | metal     |

Supplementary Table 349. Five-fold cross validated predictions for the metal/insulator classification (341/598).

| system                 | calculated | predicted |
|------------------------|------------|-----------|
| Er1Ge2Ru2.ICSD_630652  | metal      | metal     |
| Er1Ge6Mn6.ICSD_107030  | metal      | metal     |
| Er1H1O2.ICSD_34473     | insulator  | insulator |
| Er1H1.ICSD_187370      | metal      | metal     |
| Er1H1.ICSD_187373      | metal      | metal     |
| Er1H2.ICSD_187374      | metal      | metal     |
| Er1H2.ICSD_630659      | metal      | metal     |
| Er1H3O3.ICSD_200097    | insulator  | insulator |
| Er1H3.ICSD_187369      | insulator  | metal     |
| Er1H3.ICSD_187372      | metal      | metal     |
| Er1H3.ICSD_187375      | metal      | metal     |
| Er1Hg1.ICSD_630672     | metal      | metal     |
| Er1Hg2.ICSD_103246     | metal      | metal     |
| Er1Hg3.ICSD_630671     | metal      | metal     |
| Er1I1Se1.ICSD_50194    | insulator  | insulator |
| Er1In1Ni1.ICSD_165162  | metal      | metal     |
| Er1In1Pd1.ICSD_630695  | metal      | metal     |
| Er1In1Pd2.ICSD_103253  | metal      | metal     |
| Er1In1Pt1.ICSD_154843  | metal      | metal     |
| Er1In1Pt4.ICSD_630697  | metal      | metal     |
| Er1In1Rh1.ICSD_412915  | metal      | metal     |
| Er1In1Zn1.ICSD_630703  | metal      | metal     |
| Er1In1.ICSD_103248     | metal      | metal     |
| Er1In2Ni9.ICSD_600173  | metal      | metal     |
| Er1In3.ICSD_657242     | metal      | metal     |
| Er1Ir1Si1.ICSD_93220   | metal      | metal     |
| Er1Ir1Sn1.ICSD_630724  | metal      | metal     |
| Er1Ir1.ICSD_103257     | metal      | metal     |
| Er1Ir2Si2.ICSD_57231   | metal      | metal     |
| Er1Ir2.ICSD_103258     | metal      | metal     |
| Er1K1O12P4.ICSD_200795 | insulator  | insulator |
| Er1K1O2.ICSD_27002     | insulator  | insulator |
| Er1K1O8W2.ICSD_157832  | insulator  | insulator |
| Er1K1S2.ICSD_44948     | insulator  | insulator |
| Er1K1Te2.ICSD_71560    | insulator  | insulator |
| Er1Li1O12P4.ICSD_33242 | insulator  | insulator |
| Er1Li1O2.ICSD_95380    | insulator  | insulator |
| Er1Li1O2.ICSD_95381    | insulator  | insulator |
| Er1Li1S2.ICSD_630736   | insulator  | insulator |
| Er1Li1Se2.ICSD_44966   | insulator  | insulator |
| Er1Li1Sn1.ICSD_603146  | metal      | metal     |
| Er1Li1Sn2.ICSD_630741  | metal      | metal     |
| Er1Mg1Pd1.ICSD_657930  | metal      | metal     |
| Er1Mg1Sn1.ICSD_183529  | metal      | metal     |
| Er1Mg1.ICSD_103260     | metal      | metal     |
| Er1Mg2.ICSD_164275     | metal      | metal     |
| Er1Mn12.ICSD_26826     | metal      | metal     |
| Er1Mn1Ni4.ICSD_630772  | metal      | metal     |
| Er1Mn1Si1.ICSD_88062   | metal      | metal     |
| Er1Mn2Si2.ICSD_630781  | metal      | metal     |

Supplementary Table 350. Five-fold cross validated predictions for the metal/insulator classification (342/598).

| system                 | calculated | predicted |
|------------------------|------------|-----------|
| Er1Mn2.ICSD_106610     | metal      | metal     |
| Er1Mn2.ICSD_106832     | metal      | metal     |
| Er1Mo6S8.ICSD_603465   | metal      | metal     |
| Er1Mo6Se8.ICSD_630792  | metal      | metal     |
| Er1N1.ICSD_167759      | metal      | metal     |
| Er1N1.ICSD_169223      | insulator  | metal     |
| Er1Na1O2.ICSD_2739     | insulator  | insulator |
| Er1Na1O2.ICSD_97544    | insulator  | insulator |
| Er1Na1O8S2.ICSD_90775  | insulator  | insulator |
| Er1Na1P2S6.ICSD_415672 | insulator  | insulator |
| Er1Na1S2.ICSD_73481    | insulator  | insulator |
| Er1Na1Se2.ICSD_50195   | insulator  | insulator |
| Er1Ni10Si2.ICSD_97038  | metal      | metal     |
| Er1Ni1P1.ICSD_630859   | metal      | metal     |
| Er1Ni1Sb1.ICSD_103273  | insulator  | insulator |
| Er1Ni1Si2.ICSD_658583  | metal      | metal     |
| Er1Ni1Sn1.ICSD_103275  | metal      | metal     |
| Er1Ni1Zn1.ICSD_656587  | metal      | metal     |
| Er1Ni1.ICSD_630832     | metal      | metal     |
| Er1Ni2P2.ICSD_88187    | metal      | metal     |
| Er1Ni2Sb2.ICSD_630862  | metal      | metal     |
| Er1Ni2Si2.ICSD_54158   | metal      | metal     |
| Er1Ni2.ICSD_630848     | metal      | metal     |
| Er1Ni3.ICSD_152845     | metal      | metal     |
| Er1Ni3.ICSD_630836     | metal      | metal     |
| Er1Ni4P2.ICSD_601114   | metal      | metal     |
| Er1Ni4.ICSD_630812     | metal      | metal     |
| Er1Ni5.ICSD_103267     | metal      | metal     |
| Er1O14P5.ICSD_23304    | insulator  | insulator |
| Er1O2Rb1.ICSD_15161    | insulator  | insulator |
| Er1O3V1.ICSD_161781    | insulator  | insulator |
| Er1O4P1.ICSD_184547    | insulator  | insulator |
| Er1O4Ta1.ICSD_415437   | insulator  | insulator |
| Er1O4V1.ICSD_69118     | insulator  | insulator |
| Er1O4V1.ICSD_78080     | insulator  | insulator |
| Er1O6Re1Sr2.ICSD_25405 | metal      | metal     |
| Er1O6Rh1Sr3.ICSD_51057 | insulator  | insulator |
| Er1O9P3.ICSD_20935     | insulator  | insulator |
| Er1Os2Si2.ICSD_57258   | metal      | metal     |
| Er1Os2.ICSD_630903     | metal      | metal     |
| Er1P1Pd1.ICSD_69673    | insulator  | metal     |
| Er1P1S1.ICSD_630913    | insulator  | insulator |
| Er1P1.ICSD_167761      | metal      | metal     |
| Er1P1.ICSD_53407       | metal      | metal     |
| Er1P2Ru2.ICSD_602113   | metal      | metal     |
| Er1Pb1Pd1.ICSD_657946  | metal      | metal     |
| Er1Pb3.ICSD_103277     | metal      | metal     |
| Er1Pd1Sb1.ICSD_57259   | insulator  | metal     |
| Er1Pd1Si1.ICSD_408081  | metal      | metal     |
| Er1Pd1Sn1.ICSD_657627  | metal      | metal     |

Supplementary Table 351. Five-fold cross validated predictions for the metal/insulator classification (343/598).

| system                | calculated | predicted |
|-----------------------|------------|-----------|
| Er1Pd1Sn1.ICSD_657630 | metal      | metal     |
| Er1Pd1Ti1.ICSD_103286 | metal      | metal     |
| Er1Pd1Zn1.ICSD_656593 | metal      | metal     |
| Er1Pd1.ICSD_630924    | metal      | metal     |
| Er1Pd2Si1.ICSD_151859 | metal      | metal     |
| Er1Pd2Si2.ICSD_630942 | metal      | metal     |
| Er1Pd2Sn1.ICSD_103284 | metal      | metal     |
| Er1Pd3S4.ICSD_630936  | metal      | metal     |
| Er1Pd3.ICSD_656120    | metal      | metal     |
| Er1Pt1Sb1.ICSD_53409  | metal      | metal     |
| Er1Pt1Si1.ICSD_630989 | metal      | metal     |
| Er1Pt1Sn1.ICSD_630991 | metal      | metal     |
| Er1Pt1Zn1.ICSD_423115 | metal      | metal     |
| Er1Pt1.ICSD_630968    | metal      | metal     |
| Er1Pt2Si1.ICSD_630985 | metal      | metal     |
| Er1Pt2Si2.ICSD_630986 | metal      | metal     |
| Er1Pt2Si2.ICSD_630990 | metal      | metal     |
| Er1Pt2Sn1.ICSD_103292 | metal      | metal     |
| Er1Pt2.ICSD_630983    | metal      | metal     |
| Er1Pt3.ICSD_103289    | metal      | metal     |
| Er1Rb1S2.ICSD_81404   | insulator  | insulator |
| Er1Rb1Se2.ICSD_281075 | insulator  | insulator |
| Er1Re2.ICSD_630993    | metal      | metal     |
| Er1Rh1Si1.ICSD_53410  | metal      | metal     |
| Er1Rh1Sn1.ICSD_411825 | metal      | metal     |
| Er1Rh1.ICSD_631008    | metal      | metal     |
| Er1Rh2Si2.ICSD_602058 | metal      | metal     |
| Er1Rh2.ICSD_631016    | metal      | metal     |
| Er1Rh3Si2.ICSD_53412  | metal      | metal     |
| Er1Rh3Si2.ICSD_62924  | metal      | metal     |
| Er1Rh5.ICSD_103297    | metal      | metal     |
| Er1Ru1Si1.ICSD_88067  | metal      | metal     |
| Er1Ru2Si2.ICSD_631050 | metal      | metal     |
| Er1Ru2.ICSD_631040    | metal      | metal     |
| Er1S1.ICSD_631056     | metal      | metal     |
| Er1S2Ti1.ICSD_106620  | insulator  | insulator |
| Er1S2.ICSD_53415      | metal      | metal     |
| Er1S2.ICSD_631062     | metal      | metal     |
| Er1Sb1Zr1.ICSD_152643 | metal      | metal     |
| Er1Sb1.ICSD_53417     | metal      | metal     |
| Er1Sb2.ICSD_631094    | metal      | metal     |
| Er1Se1.ICSD_600371    | metal      | metal     |
| Er1Se2Ti1.ICSD_106993 | insulator  | insulator |
| Er1Se2.ICSD_631111    | metal      | metal     |
| Er1Se2.ICSD_631116    | metal      | metal     |
| Er1Si1Ti1.ICSD_88118  | metal      | metal     |
| Er1Si1.ICSD_106621    | metal      | metal     |
| Er1Si1.ICSD_631134    | metal      | metal     |
| Er1Si2.ICSD_631150    | metal      | metal     |
| Er1Si2.ICSD_631164    | metal      | metal     |

Supplementary Table 352. Five-fold cross validated predictions for the metal/insulator classification (344/598).

| system                | calculated | predicted |
|-----------------------|------------|-----------|
| Er1Sn2Zn1_ICSD_183312 | metal      | metal     |
| Er1Sn2_ICSD_168682    | metal      | metal     |
| Er1Sn3_ICSD_103305    | metal      | metal     |
| Er1Tc2_ICSD_631172    | metal      | metal     |
| Er1Te1_ICSD_631173    | metal      | metal     |
| Er1Te2Ti1_ICSD_631187 | insulator  | insulator |
| Er1Te2_ICSD_631180    | metal      | metal     |
| Er1Ti1Zn1_ICSD_631211 | metal      | metal     |
| Er1Ti1_ICSD_103312    | metal      | metal     |
| Er1Ti1_ICSD_631208    | metal      | metal     |
| Er1Ti3_ICSD_103313    | metal      | metal     |
| Er1Zn12_ICSD_631224   | metal      | metal     |
| Er1Zn1_ICSD_631214    | metal      | metal     |
| Er1Zn2_ICSD_631213    | metal      | metal     |
| Er1Zn3_ICSD_631233    | metal      | metal     |
| Er1Zn5_ICSD_103318    | metal      | metal     |
| Er1Zn5_ICSD_103319    | metal      | metal     |
| Er1_ICSD_247674       | metal      | metal     |
| Er1_ICSD_53386        | metal      | metal     |
| Er1_ICSD_53388        | metal      | metal     |
| Er2Eu1S4_ICSD_630396  | insulator  | insulator |
| Er2Eu1Se4_ICSD_630398 | insulator  | insulator |
| Er2Fe17_ICSD_106602   | metal      | metal     |
| Er2Fe1Ga8_ICSD_600152 | metal      | metal     |
| Er2Fe1Si2_ICSD_99216  | metal      | metal     |
| Er2Fe3Si5_ICSD_630508 | metal      | metal     |
| Er2Ge1Rh3_ICSD_630648 | metal      | metal     |
| Er2Ge2Mg1_ICSD_423456 | metal      | metal     |
| Er2Ge2O7_ICSD_16164   | insulator  | insulator |
| Er2Ge5Ru3_ICSD_602054 | metal      | metal     |
| Er2Ge5_ICSD_88203     | metal      | metal     |
| Er2Hf2O7_ICSD_162006  | insulator  | insulator |
| Er2In1Ni2_ICSD_630688 | metal      | metal     |
| Er2In1Ni2_ICSD_630690 | metal      | metal     |
| Er2In1Pd2_ICSD_54487  | metal      | metal     |
| Er2In1_ICSD_103251    | metal      | metal     |
| Er2Mg1Se4_ICSD_630754 | insulator  | insulator |
| Er2Mg1_ICSD_55548     | metal      | metal     |
| Er2Mn2O7_ICSD_202517  | insulator  | insulator |
| Er2Mo3Si4_ICSD_600622 | metal      | metal     |
| Er2Ni12P7_ICSD_602512 | metal      | metal     |
| Er2Ni2Sn1_ICSD_425431 | metal      | metal     |
| Er2Ni7_ICSD_630835    | metal      | metal     |
| Er2O11Te4_ICSD_413661 | insulator  | insulator |
| Er2O13Te5_ICSD_413666 | insulator  | insulator |
| Er2O1S2_ICSD_67379    | insulator  | insulator |
| Er2O2S1_ICSD_109334   | insulator  | insulator |
| Er2O2Se1_ICSD_25810   | insulator  | insulator |
| Er2O3_ICSD_160215     | insulator  | insulator |
| Er2O3_ICSD_160230     | insulator  | insulator |

Supplementary Table 353. Five-fold cross validated predictions for the metal/insulator classification (345/598).

| system                  | calculated | predicted |
|-------------------------|------------|-----------|
| Er2O3_ICSD_39189        | insulator  | insulator |
| Er2O5Si1_ICSD_419309    | insulator  | insulator |
| Er2O7Ru2_ICSD_97533     | insulator  | insulator |
| Er2O7Si2_ICSD_74779     | insulator  | insulator |
| Er2O7Sn2_ICSD_84749     | insulator  | insulator |
| Er2O7Tc2_ICSD_109081    | insulator  | insulator |
| Er2O7Ti2_ICSD_24209     | insulator  | insulator |
| Er2O7V2_ICSD_160866     | insulator  | insulator |
| Er2O9Se3_ICSD_411749    | insulator  | insulator |
| Er2Pb1Pd2_ICSD_99198    | metal      | metal     |
| Er2Pb1S4_ICSD_630919    | insulator  | insulator |
| Er2Pb1Se4_ICSD_630921   | insulator  | insulator |
| Er2Pt1_ICSD_630961      | metal      | metal     |
| Er2Rh1Si3_ICSD_97376    | metal      | metal     |
| Er2Rh3Si1_ICSD_631024   | metal      | metal     |
| Er2Ru3Si5_ICSD_68792    | metal      | metal     |
| Er2S3_ICSD_631065       | insulator  | insulator |
| Er2S3_ICSD_72292        | insulator  | insulator |
| Er2S3_ICSD_73558        | insulator  | insulator |
| Er2S4Sr1_ICSD_631075    | insulator  | insulator |
| Er2S4Yb1_ICSD_631087    | insulator  | insulator |
| Er2S4Zn1_ICSD_631088    | insulator  | insulator |
| Er2Se3_ICSD_40617       | metal      | metal     |
| Er2Se4Sr1_ICSD_631123   | insulator  | insulator |
| Er2Se4Yb1_ICSD_631130   | insulator  | insulator |
| Er2Sn5_ICSD_167894      | metal      | metal     |
| Er2Te3_ICSD_50501       | metal      | metal     |
| Er2Zn17_ICSD_103321     | metal      | metal     |
| Er2Zn17_ICSD_631219     | metal      | metal     |
| Er3F10K1_ICSD_418210    | insulator  | insulator |
| Er3Fe1Si3_ICSD_152532   | metal      | metal     |
| Er3Fe5O12_ICSD_71464    | insulator  | insulator |
| Er3Ga1O6_ICSD_99497     | insulator  | insulator |
| Er3Ga1S6_ICSD_630576    | insulator  | insulator |
| Er3Ga2Mn3Si1_ICSD_99078 | metal      | metal     |
| Er3Ga2Ni6_ICSD_630554   | metal      | metal     |
| Er3Ga2_ICSD_630544      | metal      | metal     |
| Er3Ga5O12_ICSD_9238     | insulator  | insulator |
| Er3Ga5_ICSD_602413      | metal      | metal     |
| Er3Ga9Pt2_ICSD_658055   | metal      | metal     |
| Er3Ge13Ir4_ICSD_630617  | metal      | metal     |
| Er3Ge13Os4_ICSD_630639  | metal      | metal     |
| Er3Ge13Rh4_ICSD_630645  | metal      | metal     |
| Er3Ge13Ru4_ICSD_630655  | metal      | metal     |
| Er3Ge3Ru2_ICSD_425774   | metal      | metal     |
| Er3Ge4_ICSD_80501       | metal      | metal     |
| Er3In1N1_ICSD_98506     | metal      | metal     |
| Er3In5_ICSD_630683      | metal      | metal     |
| Er3Ir1_ICSD_630704      | metal      | metal     |
| Er3Ir4Si13_ICSD_600539  | metal      | metal     |

Supplementary Table 354. Five-fold cross validated predictions for the metal/insulator classification (346/598).

| system                   | calculated | predicted |
|--------------------------|------------|-----------|
| Er3La1S6_ICSD_630730     | insulator  | insulator |
| Er3Nd1S6_ICSD_630810     | insulator  | insulator |
| Er3Ni1Si3_ICSD_152535    | metal      | metal     |
| Er3Ni1_ICSD_630815       | metal      | metal     |
| Er3Ni2_ICSD_2150         | metal      | metal     |
| Er3Ni6Si2_ICSD_630878    | metal      | metal     |
| Er3Os1_ICSD_630900       | metal      | metal     |
| Er3Os4Si13_ICSD_600536   | metal      | metal     |
| Er3P4Pd7_ICSD_74936      | metal      | metal     |
| Er3P6Pd20_ICSD_409903    | metal      | metal     |
| Er3Pd2_ICSD_107685       | metal      | metal     |
| Er3Pd4_ICSD_630930       | metal      | metal     |
| Er3Pd8Sb4_ICSD_174471    | metal      | metal     |
| Er3Pt1_ICSD_630965       | metal      | metal     |
| Er3Pt4_ICSD_630975       | metal      | metal     |
| Er3Rh1_ICSD_103299       | metal      | metal     |
| Er3Ru1_ICSD_631037       | metal      | metal     |
| Er3Ru2_ICSD_106615       | metal      | metal     |
| Er3Ru2_ICSD_631044       | metal      | metal     |
| Er3Se6Sm1_ICSD_417135    | metal      | insulator |
| Er3Ti5_ICSD_631205       | metal      | metal     |
| Er4Fe1Ga12_ICSD_248000   | metal      | metal     |
| Er4Ga12Ni1_ICSD_630564   | metal      | metal     |
| Er4Ga12Pd1_ICSD_630569   | metal      | metal     |
| Er4Ge4In1Ni2_ICSD_240334 | metal      | metal     |
| Er4Ge6Ir7_ICSD_630616    | metal      | metal     |
| Er4Ge6Os7_ICSD_630637    | metal      | metal     |
| Er4Ge6Rh7_ICSD_630644    | metal      | metal     |
| Er4I5_ICSD_200828        | metal      | metal     |
| Er4In1Ir1_ICSD_418265    | metal      | metal     |
| Er4In1Rh1_ICSD_417515    | metal      | metal     |
| Er4Sb3_ICSD_600631       | metal      | metal     |
| Er5Ga3_ICSD_602420       | metal      | metal     |
| Er5Ge3_ICSD_106605       | metal      | metal     |
| Er5In3_ICSD_630682       | metal      | metal     |
| Er5In4Ni2_ICSD_630691    | metal      | metal     |
| Er5In4Pd2_ICSD_165137    | metal      | metal     |
| Er5Ir2_ICSD_630708       | metal      | metal     |
| Er5Ir3_ICSD_630711       | metal      | metal     |
| Er5Ir4Si10_ICSD_630722   | metal      | metal     |
| Er5Mg24_ICSD_151537      | metal      | metal     |
| Er5Ni1Pb3_ICSD_152606    | metal      | metal     |
| Er5Ni2Te2_ICSD_150369    | metal      | metal     |
| Er5Pb3_ICSD_630914       | metal      | metal     |
| Er5Pt3_ICSD_630959       | metal      | metal     |
| Er5Rh3_ICSD_103300       | metal      | metal     |
| Er5Ru2_ICSD_631047       | metal      | metal     |
| Er5S7_ICSD_631059        | metal      | metal     |
| Er5Sb3_ICSD_156884       | metal      | metal     |
| Er5Si3_ICSD_631139       | metal      | metal     |

Supplementary Table 355. Five-fold cross validated predictions for the metal/insulator classification (347/598).

| system                     | calculated | predicted |
|----------------------------|------------|-----------|
| Er5Sn3_ICSD_54582          | metal      | metal     |
| Er5Ti3_ICSD_631201         | metal      | metal     |
| Er5Ti3_ICSD_631209         | metal      | metal     |
| Er6Fe23_ICSD_630446        | metal      | metal     |
| Er6Ga1Ni2_ICSD_630567      | metal      | metal     |
| Er6I10Ir1_ICSD_424428      | insulator  | insulator |
| Er6I10Ni1_ICSD_424429      | insulator  | insulator |
| Er6I7_ICSD_14183           | metal      | metal     |
| Er6Mn1Te2_ICSD_182404      | metal      | metal     |
| Er6Mn23_ICSD_630765        | metal      | metal     |
| Er6Mn23_ICSD_630767        | metal      | metal     |
| Er6Ni2Sn1_ICSD_162140      | metal      | metal     |
| Er6Zn23_ICSD_103322        | metal      | metal     |
| Er7Fe1I12_ICSD_424431      | metal      | insulator |
| Er7Ni2Te2_ICSD_280628      | metal      | metal     |
| Er7Rh3_ICSD_103301         | metal      | metal     |
| Eu0.034Mn0.966_ICSD_631390 | metal      | metal     |
| Eu1F1Mo1O4_ICSD_419248     | insulator  | insulator |
| Eu1F1O1_ICSD_184006        | insulator  | insulator |
| Eu1F2_ICSD_260882          | insulator  | insulator |
| Eu1F3_ICSD_95244           | insulator  | insulator |
| Eu1F4Mg1_ICSD_86246        | insulator  | insulator |
| Eu1F7Sn1_ICSD_71585        | insulator  | insulator |
| Eu1Fe2Si2_ICSD_631248      | metal      | metal     |
| Eu1Fe4P12_ICSD_79925       | metal      | metal     |
| Eu1Ga1Ge1_ICSD_249599      | metal      | metal     |
| Eu1Ga2Se4_ICSD_631269      | insulator  | insulator |
| Eu1Ga2_ICSD_103388         | metal      | metal     |
| Eu1Ga2_ICSD_58688          | metal      | metal     |
| Eu1Ga2_ICSD_631256         | metal      | metal     |
| Eu1Ga4_ICSD_602026         | metal      | metal     |
| Eu1Ge12Pt4_ICSD_174556     | metal      | metal     |
| Eu1Ge1Li2S4_ICSD_281012    | insulator  | insulator |
| Eu1Ge1Na1O4_ICSD_186847    | insulator  | insulator |
| Eu1Ge1Pt1_ICSD_106432      | metal      | metal     |
| Eu1Ge1Pt1_ICSD_401561      | metal      | metal     |
| Eu1Ge1Sc1_ICSD_601016      | metal      | metal     |
| Eu1Ge1Zn1_ICSD_246862      | metal      | metal     |
| Eu1Ge1Zn1_ICSD_246863      | metal      | metal     |
| Eu1Ge1Zn1_ICSD_246865      | metal      | metal     |
| Eu1Ge1Zn1_ICSD_246866      | metal      | metal     |
| Eu1Ge1Zn1_ICSD_246871      | metal      | metal     |
| Eu1Ge1_ICSD_52702          | metal      | metal     |
| Eu1Ge1_ICSD_631288         | metal      | metal     |
| Eu1Ge2Ir1_ICSD_404599      | metal      | metal     |
| Eu1Ge2Ir2_ICSD_631293      | metal      | metal     |
| Eu1Ge2Ni2_ICSD_631297      | metal      | metal     |
| Eu1Ge2Ni2_ICSD_87254       | metal      | metal     |
| Eu1Ge2Rh2_ICSD_631308      | metal      | metal     |
| Eu1Ge2Rh2_ICSD_76354       | metal      | metal     |

Supplementary Table 356. Five-fold cross validated predictions for the metal/insulator classification (348/598).

| system                    | calculated | predicted |
|---------------------------|------------|-----------|
| Eu1Ge2Ru2.ICSD_631312     | metal      | metal     |
| Eu1Ge2Zn2.ICSD_51757      | metal      | metal     |
| Eu1Ge2Zn2.ICSD_59650      | metal      | metal     |
| Eu1Ge2.ICSD_150337        | metal      | metal     |
| Eu1Ge2.ICSD_43274         | metal      | metal     |
| Eu1Ge3Ir1.ICSD_631294     | metal      | metal     |
| Eu1Ge3Ni1.ICSD_600943     | metal      | metal     |
| Eu1Ge3Pt1.ICSD_409869     | metal      | metal     |
| Eu1Ge3Rh1.ICSD_631309     | metal      | metal     |
| Eu1Ge4Ni9.ICSD_600942     | metal      | metal     |
| Eu1H1O12P4.ICSD_250030    | insulator  | insulator |
| Eu1H2.ICSD_631320         | insulator  | metal     |
| Eu1H3Li1.ICSD_416461      | insulator  | insulator |
| Eu1H4Mg1Ni1.ICSD_657978   | insulator  | insulator |
| Eu1Hg1Pb1.ICSD_602720     | metal      | metal     |
| Eu1Hg1Sn1.ICSD_602727     | metal      | metal     |
| Eu1Hg1.ICSD_103396        | metal      | metal     |
| Eu1Hg2.ICSD_631334        | metal      | metal     |
| Eu1Hg3.ICSD_631332        | metal      | metal     |
| Eu1Ho2S4.ICSD_631336      | insulator  | insulator |
| Eu1Ho2Se4.ICSD_631338     | insulator  | insulator |
| Eu1I2.ICSD_22131          | insulator  | insulator |
| Eu1I2.ICSD_260561         | insulator  | insulator |
| Eu1I2.ICSD_56816          | insulator  | insulator |
| Eu1In1Pd1.ICSD_103400     | metal      | metal     |
| Eu1In1Pd1.ICSD_631348     | metal      | metal     |
| Eu1In1Pt1.ICSD_405049     | metal      | metal     |
| Eu1In1Pt4.ICSD_631349     | metal      | metal     |
| Eu1In1.ICSD_106626        | metal      | metal     |
| Eu1In2S4.ICSD_631350      | metal      | insulator |
| Eu1In2Se4.ICSD_631352     | insulator  | insulator |
| Eu1In2.ICSD_103398        | metal      | metal     |
| Eu1In2.ICSD_631341        | metal      | metal     |
| Eu1In4.ICSD_106627        | metal      | metal     |
| Eu1Ir1P1.ICSD_602838      | metal      | metal     |
| Eu1Ir1Si3.ICSD_631358     | metal      | metal     |
| Eu1Ir1Sn2.ICSD_410700     | metal      | metal     |
| Eu1Ir2P2.ICSD_73530       | insulator  | metal     |
| Eu1Ir2Si2.ICSD_414147     | metal      | metal     |
| Eu1Ir2Si2.ICSD_631357     | metal      | metal     |
| Eu1Ir2.ICSD_631354        | metal      | metal     |
| Eu1K1Na1Nb1O5.ICSD_420036 | insulator  | insulator |
| Eu1K1Na1O5Ta1.ICSD_173777 | metal      | insulator |
| Eu1K1O4P1.ICSD_36647      | insulator  | insulator |
| Eu1K1O8W2.ICSD_173634     | metal      | insulator |
| Eu1K1P1S4.ICSD_279622     | insulator  | insulator |
| Eu1K1P1Se4.ICSD_280200    | insulator  | insulator |
| Eu1K1S2.ICSD_631365       | metal      | metal     |
| Eu1K1S4Si1.ICSD_280649    | metal      | insulator |
| Eu1K3O8P2.ICSD_94536      | metal      | insulator |

Supplementary Table 357. Five-fold cross validated predictions for the metal/insulator classification (349/598).

| system                   | calculated | predicted |
|--------------------------|------------|-----------|
| Eu1Li1O12P4.ICSD_416878  | insulator  | insulator |
| Eu1Li1O2.ICSD_422560     | insulator  | insulator |
| Eu1Li1O4Ti1.ICSD_81858   | insulator  | insulator |
| Eu1Li1O8S2.ICSD_200222   | insulator  | insulator |
| Eu1Li1P1Se4.ICSD_280199  | insulator  | insulator |
| Eu1Li2O4Si1.ICSD_50442   | insulator  | insulator |
| Eu1Mg1Pd1.ICSD_412725    | metal      | metal     |
| Eu1Mg1.ICSD_161745       | metal      | metal     |
| Eu1Mg2Sb2.ICSD_412653    | insulator  | insulator |
| Eu1Mg2.ICSD_103403       | metal      | metal     |
| Eu1Mn2P2.ICSD_51782      | metal      | metal     |
| Eu1Mn2Sb2.ICSD_100584    | metal      | metal     |
| Eu1Mo2O8Ti1.ICSD_152174  | metal      | insulator |
| Eu1Mo6S8.ICSD_62155      | metal      | metal     |
| Eu1Mo6S8.ICSD_65774      | metal      | metal     |
| Eu1Mo6Se8.ICSD_600678    | metal      | metal     |
| Eu1N1.ICSD_44772         | metal      | metal     |
| Eu1N2O2Si2.ICSD_416046   | insulator  | insulator |
| Eu1N7Si4Y1.ICSD_150460   | insulator  | insulator |
| Eu1Na1O8Sn12.ICSD_172209 | insulator  | insulator |
| Eu1Na1O4Ti1.ICSD_81536   | metal      | insulator |
| Eu1Na1S2.ICSD_631411     | metal      | insulator |
| Eu1Nb2O6.ICSD_247276     | insulator  | insulator |
| Eu1Ni1Si2.ICSD_631449    | metal      | metal     |
| Eu1Ni2P2.ICSD_15258      | metal      | metal     |
| Eu1Ni2P2.ICSD_631434     | metal      | metal     |
| Eu1Ni2Sb2.ICSD_631439    | metal      | metal     |
| Eu1Ni5P3.ICSD_40812      | metal      | metal     |
| Eu1Ni5.ICSD_103413       | metal      | metal     |
| Eu1O1.ICSD_53437         | insulator  | metal     |
| Eu1O2Rb1.ICSD_27334      | insulator  | insulator |
| Eu1O2.ICSD_631464        | metal      | insulator |
| Eu1O3Ti1.ICSD_187102     | insulator  | metal     |
| Eu1O3Ti1.ICSD_187108     | insulator  | insulator |
| Eu1O3Ti1.ICSD_187204     | insulator  | insulator |
| Eu1O4P1Rb1.ICSD_36648    | insulator  | insulator |
| Eu1O4S1.ICSD_68244       | insulator  | insulator |
| Eu1O4Sb1.ICSD_245019     | insulator  | insulator |
| Eu1O4Ta1.ICSD_415432     | insulator  | insulator |
| Eu1O4V1.ICSD_15608       | metal      | insulator |
| Eu1O4V1.ICSD_164835      | metal      | insulator |
| Eu1O4W1.ICSD_185361      | insulator  | insulator |
| Eu1O6Rh1Sr3.ICSD_51053   | insulator  | insulator |
| Eu1O8Rb1S2.ICSD_48002    | insulator  | insulator |
| Eu1Os2P2.ICSD_602107     | metal      | metal     |
| Eu1Os4Sb12.ICSD_55664    | metal      | metal     |
| Eu1P12Ru4.ICSD_631497    | metal      | metal     |
| Eu1P1Pd1.ICSD_57274      | metal      | metal     |
| Eu1P1Pt1.ICSD_631489     | metal      | metal     |
| Eu1P1Sn1.ICSD_95081      | metal      | metal     |

Supplementary Table 358. Five-fold cross validated predictions for the metal/insulator classification (350/598).

| system                | calculated | predicted |
|-----------------------|------------|-----------|
| Eu1P1.ICSD_631476     | metal      | metal     |
| Eu1P2Pd2.ICSD_631486  | metal      | metal     |
| Eu1P2Rh2.ICSD_50187   | metal      | metal     |
| Eu1P2Ru2.ICSD_602098  | metal      | metal     |
| Eu1P2Ru2.ICSD_61126   | metal      | metal     |
| Eu1P2Zn2.ICSD_631503  | insulator  | insulator |
| Eu1Pb1.ICSD_103417    | metal      | metal     |
| Eu1Pb3.ICSD_103418    | metal      | metal     |
| Eu1Pd1Sb1.ICSD_422624 | metal      | metal     |
| Eu1Pd1Si1.ICSD_631539 | metal      | metal     |
| Eu1Pd1Sn1.ICSD_657622 | metal      | metal     |
| Eu1Pd1Ti2.ICSD_172230 | metal      | metal     |
| Eu1Pd1Zn1.ICSD_420683 | metal      | metal     |
| Eu1Pd1.ICSD_631522    | metal      | metal     |
| Eu1Pd2Sb2.ICSD_168263 | metal      | metal     |
| Eu1Pd2Sb2.ICSD_47171  | metal      | metal     |
| Eu1Pd2Si2.ICSD_602027 | metal      | metal     |
| Eu1Pd2Si2.ICSD_631536 | metal      | metal     |
| Eu1Pd2Si2.ICSD_631543 | metal      | metal     |
| Eu1Pd2.ICSD_103423    | metal      | metal     |
| Eu1Pd3S4.ICSD_84667   | metal      | metal     |
| Eu1Pd3.ICSD_103425    | metal      | metal     |
| Eu1Pt1Sb1.ICSD_60831  | metal      | metal     |
| Eu1Pt1Si1.ICSD_604427 | metal      | metal     |
| Eu1Pt1Si1.ICSD_631566 | metal      | metal     |
| Eu1Pt1Sn1.ICSD_107571 | metal      | metal     |
| Eu1Pt1Zn1.ICSD_420684 | metal      | metal     |
| Eu1Pt2Si2.ICSD_631565 | metal      | metal     |
| Eu1Pt2Si2.ICSD_631567 | metal      | metal     |
| Eu1Pt2.ICSD_103431    | metal      | metal     |
| Eu1Rb1S2.ICSD_81399   | metal      | insulator |
| Eu1Rh1Si3.ICSD_631577 | metal      | metal     |
| Eu1Rh2Si2.ICSD_602028 | metal      | metal     |
| Eu1Rh2.ICSD_103432    | metal      | metal     |
| Eu1Ru1Sn3.ICSD_380383 | metal      | metal     |
| Eu1Ru2Si2.ICSD_631586 | metal      | metal     |
| Eu1Ru4Sb12.ICSD_79928 | metal      | metal     |
| Eu1S1.ICSD_183957     | insulator  | insulator |
| Eu1S1.ICSD_631595     | insulator  | insulator |
| Eu1S2Ti1.ICSD_631635  | metal      | insulator |
| Eu1S4Sb2.ICSD_600799  | metal      | insulator |
| Eu1Sb2Se4.ICSD_600803 | metal      | insulator |
| Eu1Sb2Zn2.ICSD_380375 | metal      | metal     |
| Eu1Sb2.ICSD_10081     | metal      | metal     |
| Eu1Sc2Se4.ICSD_391438 | metal      | insulator |
| Eu1Se1.ICSD_183958    | insulator  | insulator |
| Eu1Se1.ICSD_631657    | insulator  | insulator |
| Eu1Se4Y2.ICSD_631671  | insulator  | insulator |
| Eu1Si1Zn1.ICSD_106634 | metal      | metal     |
| Eu1Si1.ICSD_53446     | metal      | metal     |

Supplementary Table 359. Five-fold cross validated predictions for the metal/insulator classification (351/598).

| system                    | calculated | predicted |
|---------------------------|------------|-----------|
| Eu1Si2Zn2.ICSD_51756      | metal      | metal     |
| Eu1Si2.ICSD_103436        | metal      | metal     |
| Eu1Si2.ICSD_631674        | metal      | metal     |
| Eu1Si2.ICSD_631683        | metal      | metal     |
| Eu1Si6.ICSD_416576        | metal      | metal     |
| Eu1Sn1Zn1.ICSD_405050     | metal      | metal     |
| Eu1Sn1.ICSD_108434        | metal      | metal     |
| Eu1Sn2Zn2.ICSD_162267     | metal      | metal     |
| Eu1Sn3.ICSD_108435        | metal      | metal     |
| Eu1Te1.ICSD_33612         | insulator  | metal     |
| Eu1Te1.ICSD_53447         | metal      | insulator |
| Eu1Ti1.ICSD_103437        | metal      | metal     |
| Eu1Ti1.ICSD_631702        | metal      | metal     |
| Eu1Ti2.ICSD_103438        | metal      | metal     |
| Eu1Ti3.ICSD_103439        | metal      | metal     |
| Eu1Ti3.ICSD_631704        | metal      | metal     |
| Eu1Zn13.ICSD_103446       | metal      | metal     |
| Eu1Zn1.ICSD_103442        | metal      | metal     |
| Eu1Zn2.ICSD_103443        | metal      | metal     |
| Eu1Zn5.ICSD_103444        | metal      | metal     |
| Eu1Zn5.ICSD_631712        | metal      | metal     |
| Eu1.ICSD_44498            | metal      | metal     |
| Eu1.ICSD_53423            | metal      | metal     |
| Eu1.ICSD_631240           | metal      | metal     |
| Eu2F1K5O13Si4.ICSD_249458 | insulator  | insulator |
| Eu2Fe1H6.ICSD_631243      | metal      | insulator |
| Eu2Ga2Ge1S7.ICSD_262242   | insulator  | insulator |
| Eu2Ge1S4.ICSD_8242        | insulator  | insulator |
| Eu2Ge1Se4.ICSD_412227     | insulator  | insulator |
| Eu2Ge1Se4.ICSD_412228     | insulator  | insulator |
| Eu2H6Ru1.ICSD_656083      | insulator  | metal     |
| Eu2Hf2O7.ICSD_173953      | metal      | insulator |
| Eu2H1P1.ICSD_202068       | insulator  | insulator |
| Eu2Ir2O7.ICSD_173948      | metal      | metal     |
| Eu2Li1Si3.ICSD_416629     | metal      | metal     |
| Eu2Mn1O7Si2.ICSD_261225   | metal      | insulator |
| Eu2Mo2O7.ICSD_173946      | metal      | metal     |
| Eu2O2S1.ICSD_109330       | metal      | insulator |
| Eu2O2Te1.ICSD_89562       | metal      | metal     |
| Eu2O3.ICSD_659185         | insulator  | metal     |
| Eu2O3.ICSD_8056           | insulator  | insulator |
| Eu2O4Si1.ICSD_1510        | insulator  | insulator |
| Eu2O4Si1.ICSD_23615       | insulator  | insulator |
| Eu2O4V1.ICSD_89000        | metal      | metal     |
| Eu2O7Pb2.ICSD_173951      | metal      | insulator |
| Eu2O7Pt2.ICSD_173952      | metal      | insulator |
| Eu2O7Ru2.ICSD_109306      | metal      | metal     |
| Eu2O7Si2.ICSD_34586       | insulator  | insulator |
| Eu2O7Sn2.ICSD_84754       | metal      | insulator |
| Eu2O7Ti2.ICSD_92767       | insulator  | insulator |

Supplementary Table 360. Five-fold cross validated predictions for the metal/insulator classification (352/598).

| system                    | calculated | predicted |
|---------------------------|------------|-----------|
| Eu2O7Zr2.ICSD_173950      | metal      | metal     |
| Eu2Pd1Si3.ICSD_391246     | metal      | metal     |
| Eu2S4Si1.ICSD_95775       | insulator  | insulator |
| Eu2S4Sn1.ICSD_413022      | insulator  | insulator |
| Eu2Si1.ICSD_96114         | metal      | metal     |
| Eu3F10Rb1.ICSD_14027      | insulator  | insulator |
| Eu3Ga1O6.ICSD_99492       | insulator  | insulator |
| Eu3Ga4Ni4.ICSD_103395     | metal      | metal     |
| Eu3In1O1.ICSD_415804      | metal      | metal     |
| Eu3Ir1O7.ICSD_86476       | metal      | metal     |
| Eu3Ni6Si2.ICSD_631451     | metal      | metal     |
| Eu3O12Sb5.ICSD_67023      | insulator  | insulator |
| Eu3O6Ta1.ICSD_4148        | metal      | metal     |
| Eu3O7Os1.ICSD_170874      | metal      | metal     |
| Eu3O7Ru1.ICSD_93668       | metal      | insulator |
| Eu3Pd2.ICSD_103428        | metal      | metal     |
| Eu3Rh4Sn13.ICSD_102358    | metal      | metal     |
| Eu3S4.ICSD_100522         | metal      | metal     |
| Eu3S4.ICSD_151633         | metal      | metal     |
| Eu4I6O1.ICSD_281554       | insulator  | insulator |
| Eu4Ir1.ICSD_103402        | metal      | metal     |
| Eu4O1Sb2.ICSD_402953      | insulator  | metal     |
| Eu5O15Ta4.ICSD_166562     | insulator  | insulator |
| Eu5Sb3.ICSD_173030        | metal      | metal     |
| F10H1P1Pb2.ICSD_419141    | insulator  | insulator |
| F10Hg3Nb2O4S1.ICSD_60920  | insulator  | insulator |
| F10Hg3O4S1Ta2.ICSD_60922  | insulator  | insulator |
| F10In3Rb1.ICSD_200052     | insulator  | insulator |
| F10K1Tb3.ICSD_28214       | insulator  | insulator |
| F10K1Y3.ICSD_155137       | insulator  | insulator |
| F10K1Yb3.ICSD_28258       | insulator  | insulator |
| F10Na1Sb3.ICSD_1968       | insulator  | insulator |
| F10Nb1Sb1.ICSD_16095      | insulator  | insulator |
| F10Pb3Zr1.ICSD_100600     | insulator  | insulator |
| F11Fe1Na1Zr2.ICSD_81220   | insulator  | insulator |
| F11Hf2Na1V1.ICSD_94460    | insulator  | insulator |
| F11I2Sb2.ICSD_6031        | metal      | insulator |
| F11Kr3Sb1.ICSD_279628     | insulator  | insulator |
| F11La1Zr2.ICSD_424909     | insulator  | insulator |
| F11Mn1Na1Zr2.ICSD_81219   | insulator  | insulator |
| F11Na1Ni1Zr2.ICSD_81222   | insulator  | insulator |
| F11Na1Pd1Zr2.ICSD_77241   | insulator  | insulator |
| F11Na1Ti1Zr2.ICSD_78867   | metal      | insulator |
| F11Na1V1Zr2.ICSD_78868    | insulator  | insulator |
| F11Na1Zn1Zr2.ICSD_81223   | insulator  | insulator |
| F11Pr1Zr2.ICSD_72156      | insulator  | insulator |
| F12Fe2Li3Na3.ICSD_17056   | insulator  | insulator |
| F12Ge5.ICSD_10295         | insulator  | insulator |
| F12H8O4Pt1Sb2.ICSD_421861 | metal      | insulator |
| F12I4Sb2.ICSD_63301       | insulator  | insulator |

Supplementary Table 361. Five-fold cross validated predictions for the metal/insulator classification (353/598).

| system                     | calculated | predicted |
|----------------------------|------------|-----------|
| F12K1Tb3.ICSD_51125        | metal      | insulator |
| F12K2O1Zr3.ICSD_281350     | insulator  | insulator |
| F12Mn1Sb2.ICSD_411522      | insulator  | insulator |
| F12O1Ti2Zr3.ICSD_48003     | insulator  | insulator |
| F12O8Os2Xe2.ICSD_260293    | insulator  | insulator |
| F12P4Pt1.ICSD_418726       | insulator  | insulator |
| F12Sb2Te4.ICSD_201222      | insulator  | insulator |
| F13H4P1Sr2.ICSD_415154     | insulator  | insulator |
| F13K1Sb4.ICSD_24740        | insulator  | insulator |
| F13K1Sb4.ICSD_4049         | insulator  | insulator |
| F13N1O2Xe2.ICSD_404987     | insulator  | insulator |
| F13Na5Zr2.ICSD_14133       | insulator  | insulator |
| F14H2Mg1Sb2.ICSD_412893    | insulator  | insulator |
| F14K4Sb2Sn1.ICSD_241228    | insulator  | insulator |
| F14N2Ni1.ICSD_26397        | insulator  | insulator |
| F14Sb4.ICSD_35709          | insulator  | insulator |
| F14Sr4Zn3.ICSD_72991       | insulator  | insulator |
| F15Nb6.ICSD_415950         | metal      | insulator |
| F15Pr1Zr3.ICSD_72838       | insulator  | insulator |
| F16Ge7.ICSD_405946         | insulator  | insulator |
| F18Mg6Rb6.ICSD_410385      | insulator  | insulator |
| F18Ni6Rb6.ICSD_410390      | insulator  | insulator |
| F18P2Pb1Xe3.ICSD_249570    | insulator  | insulator |
| F18P2Sr1Xe3.ICSD_249568    | insulator  | insulator |
| F1Fe1H4Na1O6S1.ICSD_169110 | insulator  | insulator |
| F1Fe1Li1O4S1.ICSD_180389   | insulator  | insulator |
| F1Fe1Na1O4S1.ICSD_262276   | insulator  | insulator |
| F1Fe1O3Sr2.ICSD_93510      | insulator  | insulator |
| F1Fe1O3Te1.ICSD_241141     | insulator  | insulator |
| F1Fe1O4S1.ICSD_182945      | insulator  | insulator |
| F1Ga1O3Te1.ICSD_241140     | insulator  | insulator |
| F1Ga1O4Sr3.ICSD_50734      | insulator  | insulator |
| F1Gd1Mo1O4.ICSD_419249     | insulator  | insulator |
| F1Gd1O1.ICSD_184007        | insulator  | insulator |
| F1Gd1O4S1.ICSD_410324      | insulator  | insulator |
| F1Gd1S1.ICSD_93355         | insulator  | insulator |
| F1Gd3O12Se4.ICSD_411086    | insulator  | insulator |
| F1H10N2O4P1.ICSD_2803      | insulator  | insulator |
| F1H1Hg1O1.ICSD_200744      | insulator  | insulator |
| F1H1Hg1O3Te1.ICSD_413078   | insulator  | insulator |
| F1H1Mg1O1.ICSD_186501      | insulator  | insulator |
| F1H1Na1O4P1Sn1.ICSD_96768  | insulator  | insulator |
| F1H1O1.ICSD_63681          | insulator  | insulator |
| F1H1O3S1.ICSD_65781        | insulator  | insulator |
| F1H2K1Li1O4P1.ICSD_2044    | insulator  | insulator |
| F1H2O1Rb1.ICSD_250327      | insulator  | insulator |
| F1H3K1O3P1.ICSD_9151       | insulator  | insulator |
| F1H3O1.ICSD_24382          | insulator  | insulator |
| F1H3O4S1.ICSD_33866        | insulator  | insulator |
| F1H3Si1.ICSD_60065         | insulator  | insulator |

Supplementary Table 362. Five-fold cross validated predictions for the metal/insulator classification (354/598).

| system                     | calculated | predicted |
|----------------------------|------------|-----------|
| F1H4K1O2.ICSD.165373       | insulator  | insulator |
| F1H4K1O4.ICSD.22366        | insulator  | insulator |
| F1H4Li1N1O3P1.ICSD.1439    | insulator  | insulator |
| F1H4Mg1Na1O6S1.ICSD.201712 | insulator  | insulator |
| F1H4N1.ICSD.14294          | insulator  | insulator |
| F1H4Na1Ni1O6S1.ICSD.169112 | insulator  | insulator |
| F1H5N2.ICSD.6019           | insulator  | insulator |
| F1H6N1Na1O4P1.ICSD.240974  | insulator  | insulator |
| F1H6N1O2.ICSD.28552        | insulator  | insulator |
| F1H6Na1O6Te1.ICSD.42       | insulator  | insulator |
| F1H7N2.ICSD.419918         | insulator  | insulator |
| F1Hg2O3P1.ICSD.414292      | insulator  | insulator |
| F1Ho1Mo1O4.ICSD.419252     | insulator  | insulator |
| F1Ho1O1.ICSD.184011        | insulator  | insulator |
| F1Ho1O3Se1.ICSD.419000     | insulator  | insulator |
| F1Ho1S1.ICSD.94475         | insulator  | insulator |
| F1Ho3O12Se4.ICSD.419001    | insulator  | insulator |
| F1I1O2.ICSD.280804         | insulator  | insulator |
| F1I1Pb1.ICSD.155012        | insulator  | insulator |
| F1I1Sr1.ICSD.155009        | insulator  | insulator |
| F1In1O1.ICSD.2521          | insulator  | insulator |
| F1In1O3Te1.ICSD.260009     | insulator  | insulator |
| F1K1Nb4O5.ICSD.88880       | metal      | metal     |
| F1K1O2S1.ICSD.89602        | insulator  | insulator |
| F1K1O2Se1.ICSD.78398       | insulator  | insulator |
| F1K1O3Xe1.ICSD.15219       | insulator  | insulator |
| F1K1O4S1Sn1.ICSD.94532     | insulator  | insulator |
| F1K1O6Te3.ICSD.95727       | insulator  | insulator |
| F1K1.ICSD.61558            | insulator  | insulator |
| F1K1.ICSD.64686            | insulator  | insulator |
| F1K2O3P1.ICSD.200441       | insulator  | insulator |
| F1K3O4S1.ICSD.81835        | insulator  | insulator |
| F1K3O4Se1.ICSD.82750       | insulator  | insulator |
| F1La1O1.ICSD.30622         | insulator  | insulator |
| F1La1O1.ICSD.76427         | insulator  | insulator |
| F1La1S1.ICSD.93350         | insulator  | insulator |
| F1La1Se1.ICSD.21010        | insulator  | insulator |
| F1Li1Ni1O4S1.ICSD.180391   | insulator  | insulator |
| F1Li1O3S1.ICSD.1384        | insulator  | insulator |
| F1Li1O4P1V1.ICSD.184601    | insulator  | insulator |
| F1Li1O4Si1Sr2.ICSD.79805   | insulator  | insulator |
| F1Li1.ICSD.18012           | insulator  | insulator |
| F1Li1.ICSD.184904          | insulator  | insulator |
| F1Lu1O3Se1.ICSD.417449     | insulator  | insulator |
| F1Lu1S1.ICSD.89549         | insulator  | insulator |
| F1Mg1Na1O4S1.ICSD.262272   | insulator  | insulator |
| F1Mg2N1.ICSD.17021         | insulator  | insulator |
| F1Mn2O4P1.ICSD.2814        | insulator  | insulator |
| F1Mo1O4Tb1.ICSD.419250     | insulator  | insulator |
| F1Mo1O4Y1.ICSD.249646      | insulator  | insulator |

Supplementary Table 363. Five-fold cross validated predictions for the metal/insulator classification (355/598).

| system                   | calculated | predicted |
|--------------------------|------------|-----------|
| F1N1O1.ICSD.411510       | insulator  | insulator |
| F1N1O3Xe1.ICSD.174511    | insulator  | insulator |
| F1N1Th1.ICSD.236315      | insulator  | insulator |
| F1N3O2S4.ICSD.14028      | insulator  | insulator |
| F1N3Ta2.ICSD.182353      | metal      | metal     |
| F1Na1Nb6O15.ICSD.24109   | insulator  | insulator |
| F1Na1O4P1Y1.ICSD.51463   | insulator  | insulator |
| F1Na1O4S1Zn1.ICSD.262274 | insulator  | insulator |
| F1Na1.ICSD.44276         | insulator  | insulator |
| F1Na3O4S1.ICSD.9519      | insulator  | insulator |
| F1Na3O4W1.ICSD.417289    | insulator  | insulator |
| F1Na5O16Si4Y4.ICSD.20795 | insulator  | insulator |
| F1Nd1O1.ICSD.95655       | insulator  | insulator |
| F1Nd1S1.ICSD.94471       | insulator  | insulator |
| F1Nd1Se1.ICSD.108968     | insulator  | insulator |
| F1Nd1Te1.ICSD.108969     | insulator  | insulator |
| F1O1Sb1.ICSD.19019       | insulator  | insulator |
| F1O1Sc1.ICSD.100564      | insulator  | insulator |
| F1O1Tb1.ICSD.184009      | insulator  | insulator |
| F1O1Y1.ICSD.184004       | insulator  | insulator |
| F1O1Y1.ICSD.76426        | insulator  | insulator |
| F1O1Yb1.ICSD.75557       | insulator  | insulator |
| F1O2Rb1S1.ICSD.93064     | insulator  | insulator |
| F1O3P1Rb2.ICSD.172343    | insulator  | insulator |
| F1O3P1Sn1.ICSD.2039      | insulator  | insulator |
| F1O3S1Ti1.ICSD.424114    | insulator  | insulator |
| F1O3Se1Y1.ICSD.418898    | insulator  | insulator |
| F1O3Se1Yb1.ICSD.419953   | insulator  | insulator |
| F1O3Tc1.ICSD.249509      | insulator  | insulator |
| F1O4P1V1.ICSD.183878     | insulator  | insulator |
| F1O4Rb1S1.ICSD.8275      | insulator  | insulator |
| F1O4S1Y1.ICSD.92288      | insulator  | insulator |
| F1Pr1S1.ICSD.94470       | insulator  | insulator |
| F1Rb1.ICSD.53828         | insulator  | insulator |
| F1Rb1.ICSD.61562         | insulator  | insulator |
| F1S1Tb1.ICSD.94474       | insulator  | insulator |
| F1S1Y1.ICSD.2597         | insulator  | insulator |
| F1S1Y1.ICSD.87130        | insulator  | insulator |
| F1Se1Y1.ICSD.1827        | insulator  | insulator |
| F1Ti1.ICSD.16112         | insulator  | insulator |
| F1Ti1.ICSD.16113         | insulator  | insulator |
| F1Ti1.ICSD.90992         | insulator  | insulator |
| F1Ti1.ICSD.90993         | insulator  | insulator |
| F1Ti1.ICSD.9893          | insulator  | insulator |
| F1.ICSD.426939           | insulator  | insulator |
| F20O2Re2Sb2.ICSD.201546  | insulator  | insulator |
| F24Sb2Xe6Zn1.ICSD.416302 | insulator  | insulator |
| F25K1Th6.ICSD.2711       | insulator  | insulator |
| F2Fe1.ICSD.73729         | insulator  | insulator |
| F2Fe2H1O3P1.ICSD.391478  | insulator  | insulator |

Supplementary Table 364. Five-fold cross validated predictions for the metal/insulator classification (356/598).

| system                      | calculated | predicted |
|-----------------------------|------------|-----------|
| F2Fe2O1S2Sr2.ICSD_249688    | insulator  | insulator |
| F2Fe2O1Se2Sr2.ICSD_249690   | insulator  | insulator |
| F2Ge1.ICSD_18030            | insulator  | insulator |
| F2H1K1.ICSD_9345            | insulator  | insulator |
| F2H1Li1.ICSD_23883          | insulator  | insulator |
| F2H1N1O4S2.ICSD_50523       | insulator  | insulator |
| F2H1N1.ICSD_404200          | insulator  | insulator |
| F2H1Na1.ICSD_26870          | insulator  | insulator |
| F2H1P1S1.ICSD_63001         | insulator  | insulator |
| F2H1P1.ICSD_406360          | insulator  | insulator |
| F2H1Rb1.ICSD_45859          | insulator  | insulator |
| F2H2N1P1.ICSD_201528        | insulator  | insulator |
| F2H2O5S1Sn2.ICSD_39455      | insulator  | insulator |
| F2H4N1O2P1.ICSD_16152       | insulator  | insulator |
| F2H4O1.ICSD_24383           | insulator  | insulator |
| F2H5In1N2.ICSD_87965        | insulator  | insulator |
| F2H8O4Zn1.ICSD_14064        | insulator  | insulator |
| F2Hg1.ICSD_33614            | insulator  | insulator |
| F2Hg2.ICSD_27700            | insulator  | insulator |
| F2Hg3S2.ICSD_16927          | insulator  | insulator |
| F2I1K1O2.ICSD_26600         | insulator  | insulator |
| F2I1Na1O2.ICSD_260003       | insulator  | insulator |
| F2I2O6S2.ICSD_74647         | insulator  | insulator |
| F2K1Mg2Na1O10Si4.ICSD_98196 | insulator  | insulator |
| F2K1O2P1.ICSD_26640         | insulator  | insulator |
| F2K2O5P2.ICSD_1659          | insulator  | insulator |
| F2K3Na1O6P2.ICSD_1904       | insulator  | insulator |
| F2Kr1.ICSD_23534            | insulator  | insulator |
| F2Kr1.ICSD_279623           | insulator  | insulator |
| F2Li1Rb1.ICSD_18019         | insulator  | insulator |
| F2Mg1.ICSD_51242            | insulator  | insulator |
| F2Mg1.ICSD_51243            | insulator  | insulator |
| F2Mg1.ICSD_94279            | insulator  | insulator |
| F2Mg1.ICSD_94280            | insulator  | insulator |
| F2Mg1.ICSD_94283            | insulator  | insulator |
| F2Mn1.ICSD_12167            | insulator  | insulator |
| F2Mn1.ICSD_20365            | insulator  | insulator |
| F2Mn1.ICSD_53985            | insulator  | insulator |
| F2N1P1.ICSD_9684            | insulator  | insulator |
| F2N3O1P1.ICSD_248120        | insulator  | insulator |
| F2Na1Nb1O2.ICSD_23238       | insulator  | insulator |
| F2Na1O2V1.ICSD_75418        | insulator  | insulator |
| F2Ni1.ICSD_34307            | insulator  | insulator |
| F2Ni1.ICSD_73726            | insulator  | insulator |
| F2O1Pb2.ICSD_10416          | insulator  | insulator |
| F2O1Pb2.ICSD_76964          | insulator  | insulator |
| F2O1Se1.ICSD_12110          | insulator  | insulator |
| F2O1Te1.ICSD_88415          | insulator  | insulator |
| F2O2P1Rb1.ICSD_1980         | insulator  | insulator |
| F2O2S1.ICSD_62968           | insulator  | insulator |

Supplementary Table 365. Five-fold cross validated predictions for the metal/insulator classification (357/598).

| system                  | calculated | predicted |
|-------------------------|------------|-----------|
| F2O2U1.ICSD_31630       | insulator  | insulator |
| F2O2Xe1.ICSD_10203      | insulator  | insulator |
| F2O3Os1.ICSD_73732      | insulator  | insulator |
| F2O3S1Xe1.ICSD_10357    | insulator  | insulator |
| F2O3Te2.ICSD_82162      | insulator  | insulator |
| F2O4Rb1S1Sb1.ICSD_32709 | insulator  | insulator |
| F2O7Te2V2.ICSD_173748   | insulator  | insulator |
| F2Pb1.ICSD_154995       | insulator  | insulator |
| F2Pb1.ICSD_86738        | insulator  | insulator |
| F2Pd1.ICSD_100567       | insulator  | insulator |
| F2Pd1.ICSD_16763        | insulator  | insulator |
| F2S3Sn1Sr2.ICSD_171346  | insulator  | insulator |
| F2Sb2Se4Sr2.ICSD_171430 | insulator  | insulator |
| F2Se3Sn1Sr2.ICSD_171345 | insulator  | insulator |
| F2Sn1.ICSD_10485        | insulator  | insulator |
| F2Sn1.ICSD_14194        | insulator  | insulator |
| F2Sn1.ICSD_14195        | insulator  | insulator |
| F2Sr1.ICSD_260881       | insulator  | insulator |
| F2Sr1.ICSD_262350       | insulator  | insulator |
| F2Ti1.ICSD_65410        | insulator  | insulator |
| F2V1.ICSD_201245        | insulator  | insulator |
| F2Xe1.ICSD_26625        | insulator  | insulator |
| F2Zn1.ICSD_20364        | insulator  | insulator |
| F2Zn1.ICSD_280605       | insulator  | insulator |
| F2.ICSD_15821           | metal      | insulator |
| F2.ICSD_16262           | insulator  | insulator |
| F2.ICSD_22271           | insulator  | insulator |
| F3Fe1K0.6.ICSD_2603     | metal      | insulator |
| F3Fe1K1.ICSD_15424      | metal      | insulator |
| F3Fe1Na1.ICSD_68981     | insulator  | insulator |
| F3Fe1Rb1.ICSD_49586     | metal      | insulator |
| F3Fe1.ICSD_202047       | insulator  | insulator |
| F3Fe1.ICSD_240399       | insulator  | insulator |
| F3Fe1.ICSD_29132        | insulator  | insulator |
| F3Ga1H3N1.ICSD_89503    | insulator  | insulator |
| F3Ga1.ICSD_409507       | insulator  | insulator |
| F3H1Sr1.ICSD_35408      | insulator  | insulator |
| F3H2P1.ICSD_406359      | insulator  | insulator |
| F3H6O3V1.ICSD_69571     | metal      | insulator |
| F3Hg1Rb1.ICSD_15169     | insulator  | insulator |
| F3Ho1.ICSD_200955       | insulator  | insulator |
| F3I1O1.ICSD_4076        | insulator  | insulator |
| F3I1Sn2.ICSD_2419       | insulator  | insulator |
| F3I1.ICSD_411036        | insulator  | insulator |
| F3In1.ICSD_18028        | insulator  | insulator |
| F3Ir1.ICSD_16676        | metal      | insulator |
| F3Ir1.ICSD_77619        | insulator  | metal     |
| F3K1Mg1.ICSD_56096      | insulator  | insulator |
| F3K1Mn1.ICSD_246921     | insulator  | insulator |
| F3K1Mn1.ICSD_35507      | insulator  | insulator |

Supplementary Table 366. Five-fold cross validated predictions for the metal/insulator classification (358/598).

| system                    | calculated | predicted |
|---------------------------|------------|-----------|
| F3K1Mn1.ICSD_37254        | insulator  | insulator |
| F3K1Mn1.ICSD_4054         | insulator  | insulator |
| F3K1Mn1.ICSD_89343        | insulator  | insulator |
| F3K1Ni1.ICSD_44786        | insulator  | insulator |
| F3K1O1Te1.ICSD_201155     | insulator  | insulator |
| F3K1Pd1.ICSD_73167        | insulator  | insulator |
| F3K1V1.ICSD_28145         | insulator  | insulator |
| F3K1Zn1.ICSD_63157        | insulator  | insulator |
| F3K2O2V1.ICSD_9122        | insulator  | insulator |
| F3K3N3O9Sb1.ICSD_35677    | insulator  | insulator |
| F3K3O4Ti1.ICSD_39273      | insulator  | insulator |
| F3K3O4Ti1.ICSD_39811      | insulator  | insulator |
| F3La1.ICSD_164054         | insulator  | insulator |
| F3La1.ICSD_164055         | insulator  | insulator |
| F3La1.ICSD_167553         | insulator  | insulator |
| F3La1.ICSD_16964          | insulator  | insulator |
| F3La1.ICSD_246323         | insulator  | insulator |
| F3La1.ICSD_28538          | insulator  | insulator |
| F3La1.ICSD_34108          | insulator  | insulator |
| F3La1.ICSD_96134          | insulator  | insulator |
| F3La3O9Si3.ICSD_89522     | insulator  | insulator |
| F3Mg1Na1.ICSD_156157      | insulator  | insulator |
| F3Mg1Na1.ICSD_156158      | insulator  | insulator |
| F3Mg1Na1.ICSD_171813      | insulator  | insulator |
| F3Mg1Na1.ICSD_90283       | insulator  | insulator |
| F3Mg1Rb1.ICSD_49585       | insulator  | insulator |
| F3Mg3N1.ICSD_262326       | insulator  | insulator |
| F3Mn1Na1.ICSD_65770       | insulator  | insulator |
| F3Mn1Rb1.ICSD_43722       | insulator  | insulator |
| F3Mn1.ICSD_19080          | insulator  | insulator |
| F3Mn1.ICSD_73113          | insulator  | insulator |
| F3Mo1Na3O3.ICSD_97452     | insulator  | insulator |
| F3Mo1.ICSD_30612          | insulator  | metal     |
| F3Mo1.ICSD_68527          | insulator  | insulator |
| F3N3S3.ICSD_21015         | insulator  | insulator |
| F3Na1Ni1.ICSD_423598      | insulator  | insulator |
| F3Na1Ni1.ICSD_9008        | insulator  | insulator |
| F3Na1V1.ICSD_60611        | insulator  | insulator |
| F3Na1Zn1.ICSD_69349       | insulator  | insulator |
| F3Na7O12S3Sn1.ICSD_250242 | insulator  | insulator |
| F3Nb1.ICSD_60246          | metal      | insulator |
| F3Nd1.ICSD_155557         | insulator  | insulator |
| F3Nd1.ICSD_16967          | insulator  | insulator |
| F3Nd1.ICSD_63049          | insulator  | insulator |
| F3Ni1.ICSD_87943          | insulator  | insulator |
| F3O1Rb1V1.ICSD_249403     | insulator  | insulator |
| F3O1V1.ICSD_249507        | insulator  | insulator |
| F3O2Re1.ICSD_415421       | insulator  | insulator |
| F3O4P1Sn3.ICSD_37133      | insulator  | insulator |
| F3Pb1Rb1.ICSD_49591       | insulator  | insulator |

Supplementary Table 367. Five-fold cross validated predictions for the metal/insulator classification (359/598).

| system                     | calculated | predicted |
|----------------------------|------------|-----------|
| F3Pd1Rb1.ICSD_73166        | insulator  | insulator |
| F3Pd1.ICSD_16675           | metal      | insulator |
| F3Pd1.ICSD_29135           | metal      | insulator |
| F3Pr1.ICSD_16966           | insulator  | insulator |
| F3Pr1.ICSD_77741           | insulator  | insulator |
| F3Pu1.ICSD_29013           | metal      | insulator |
| F3Rb1V1.ICSD_28146         | insulator  | insulator |
| F3Rb1Yb1.ICSD_49590        | insulator  | insulator |
| F3Rb1Zn1.ICSD_41618        | insulator  | insulator |
| F3Rh1.ICSD_16674           | metal      | insulator |
| F3Rh1.ICSD_29134           | insulator  | insulator |
| F3Rh1.ICSD_62262           | insulator  | metal     |
| F3Ru1.ICSD_16673           | insulator  | insulator |
| F3Sb1.ICSD_30411           | insulator  | insulator |
| F3Sc1.ICSD_261083          | insulator  | insulator |
| F3Sc1.ICSD_30215           | insulator  | insulator |
| F3Sc1.ICSD_36011           | insulator  | insulator |
| F3Ta1.ICSD_30613           | metal      | insulator |
| F3Tb1.ICSD_167473          | insulator  | insulator |
| F3Ti1.ICSD_28783           | metal      | insulator |
| F3Ti1.ICSD_52159           | insulator  | insulator |
| F3Ti1.ICSD_52163           | metal      | insulator |
| F3Tl1.ICSD_10365           | insulator  | insulator |
| F3U1.ICSD_24966            | insulator  | insulator |
| F3V1.ICSD_30624            | insulator  | insulator |
| F3Y1.ICSD_15961            | insulator  | insulator |
| F3Y1.ICSD_6023             | insulator  | insulator |
| F3Yb1.ICSD_9844            | insulator  | insulator |
| F4Fe1K1.ICSD_60615         | insulator  | insulator |
| F4Fe1Na1.ICSD_15501        | insulator  | insulator |
| F4Fe1Rb1.ICSD_21071        | insulator  | insulator |
| F4Fe1Rb1.ICSD_21072        | insulator  | insulator |
| F4Fe1Rb1.ICSD_85499        | insulator  | insulator |
| F4Fe1Rb1.ICSD_85500        | insulator  | insulator |
| F4Ga1H4N1.ICSD_410849      | insulator  | insulator |
| F4Ge1.ICSD_202558          | insulator  | insulator |
| F4H1K1O1Te1.ICSD_155199    | insulator  | insulator |
| F4H1Mn1Na2O3P1.ICSD_424942 | insulator  | insulator |
| F4H1O1Rb1Te1.ICSD_155198   | insulator  | insulator |
| F4H1P1.ICSD_406358         | insulator  | insulator |
| F4H2O3Te2.ICSD_9653        | insulator  | insulator |
| F4H3K1.ICSD_202107         | insulator  | insulator |
| F4H3N1Zr1.ICSD_50233       | insulator  | insulator |
| F4H6N2Si1.ICSD_78902       | insulator  | insulator |
| F4H6O1.ICSD_32569          | insulator  | insulator |
| F4H7In1N2O1.ICSD_35        | insulator  | insulator |
| F4H7N1.ICSD_38337          | insulator  | insulator |
| F4H8N2O1V1.ICSD_23317      | insulator  | insulator |
| F4H8N2.ICSD_87361          | insulator  | insulator |
| F4Hf1.ICSD_66008           | insulator  | insulator |

Supplementary Table 368. Five-fold cross validated predictions for the metal/insulator classification (360/598).

| system                   | calculated | predicted |
|--------------------------|------------|-----------|
| F4Hg1Rb2.ICSD_72352      | insulator  | insulator |
| F4In1Li1.ICSD_66693      | insulator  | insulator |
| F4Ir1.ICSD_23483         | insulator  | insulator |
| F4K1Mn1.ICSD_72394       | insulator  | insulator |
| F4K1Mo1Na1O2.ICSD_422707 | insulator  | insulator |
| F4K1O1V1.ICSD_9295       | insulator  | insulator |
| F4K1Pr1.ICSD_281289      | insulator  | insulator |
| F4K1Sc1.ICSD_72736       | insulator  | insulator |
| F4K2Mg1.ICSD_33519       | insulator  | insulator |
| F4K2Mn1.ICSD_23183       | insulator  | insulator |
| F4K2Ni1.ICSD_15576       | insulator  | insulator |
| F4K2O1Te1.ICSD_412955    | insulator  | insulator |
| F4K2Pd1.ICSD_33888       | insulator  | insulator |
| F4K2Zn1.ICSD_100298      | insulator  | insulator |
| F4La1Rb1.ICSD_262425     | insulator  | insulator |
| F4Li1Lu1.ICSD_152948     | insulator  | insulator |
| F4Li1Mn1.ICSD_62655      | insulator  | insulator |
| F4Li1O2Re1.ICSD_280011   | insulator  | insulator |
| F4Li1Sc1.ICSD_413966     | insulator  | insulator |
| F4Li1Y1.ICSD_27896       | insulator  | insulator |
| F4Li1Y1.ICSD_55692       | insulator  | insulator |
| F4Li1Yb1.ICSD_9914       | insulator  | insulator |
| F4Mg1Rb2.ICSD_69681      | insulator  | insulator |
| F4Mg1Sr1.ICSD_86248      | insulator  | insulator |
| F4Mn1Na1.ICSD_71456      | insulator  | insulator |
| F4Mn1Rb1.ICSD_73587      | insulator  | insulator |
| F4N4S4.ICSD_18202        | insulator  | insulator |
| F4Na1Sb1.ICSD_24750      | insulator  | insulator |
| F4Na1Ti1.ICSD_389        | insulator  | insulator |
| F4Na1V1.ICSD_407013      | insulator  | insulator |
| F4Na2O2W1.ICSD_201173    | insulator  | insulator |
| F4Na2Pd1.ICSD_71101      | insulator  | insulator |
| F4Nb1.ICSD_25768         | insulator  | insulator |
| F4Ni1Rb2.ICSD_69682      | insulator  | insulator |
| F4O1Os1.ICSD_417246      | insulator  | insulator |
| F4O1Ru1.ICSD_417249      | insulator  | insulator |
| F4O1Tc1.ICSD_16143       | insulator  | insulator |
| F4O1U1.ICSD_200058       | insulator  | insulator |
| F4O1W1.ICSD_10393        | insulator  | insulator |
| F4O2Sn4.ICSD_948         | insulator  | insulator |
| F4Pb1Pd1.ICSD_108992     | insulator  | insulator |
| F4Pb1Sn1.ICSD_152954     | insulator  | insulator |
| F4Pb1.ICSD_78895         | insulator  | insulator |
| F4Pd1Sr1.ICSD_108990     | insulator  | insulator |
| F4Pd1.ICSD_1555          | insulator  | insulator |
| F4Pt1.ICSD_71579         | insulator  | insulator |
| F4Ru1.ICSD_165398        | insulator  | insulator |
| F4S1W1.ICSD_37245        | insulator  | insulator |
| F4S2Yb3.ICSD_92497       | metal      | insulator |
| F4Sb1Ti1.ICSD_201084     | insulator  | insulator |

Supplementary Table 369. Five-fold cross validated predictions for the metal/insulator classification (361/598).

| system                   | calculated | predicted |
|--------------------------|------------|-----------|
| F4Se1.ICSD_85451         | insulator  | insulator |
| F4Si1.ICSD_24500         | insulator  | insulator |
| F4Sn1.ICSD_16794         | insulator  | insulator |
| F4Sr1Zn1.ICSD_16807      | insulator  | insulator |
| F4Tc1.ICSD_249918        | insulator  | insulator |
| F4Te1.ICSD_9869          | insulator  | insulator |
| F4V1.ICSD_65785          | insulator  | insulator |
| F4Xe1.ICSD_26626         | insulator  | insulator |
| F4Zr1.ICSD_35100         | insulator  | insulator |
| F5Fe1H2K2O1.ICSD_16090   | insulator  | insulator |
| F5Fe1H4Mn1O2.ICSD_202193 | insulator  | insulator |
| F5Fe1H4Mn1O2.ICSD_62362  | insulator  | insulator |
| F5Fe1H4O2Zn1.ICSD_202194 | insulator  | insulator |
| F5Fe2H4O2.ICSD_201799    | insulator  | insulator |
| F5Ga1H4Mn1O2.ICSD_245172 | insulator  | insulator |
| F5H2K2Mn1O1.ICSD_26071   | insulator  | insulator |
| F5H2K2O1V1.ICSD_59818    | insulator  | insulator |
| F5H2Mn1O1Rb2.ICSD_2435   | insulator  | insulator |
| F5H2Mn1O1Ti2.ICSD_71517  | insulator  | insulator |
| F5H2Mn1O1Ti2.ICSD_71518  | insulator  | insulator |
| F5H2N1Te1.ICSD_171449    | insulator  | insulator |
| F5H3N1P1.ICSD_36010      | insulator  | insulator |
| F5H4Mn1O2V1.ICSD_80157   | metal      | insulator |
| F5H8N1.ICSD_38338        | insulator  | insulator |
| F5H8N2Nb1O2.ICSD_200233  | insulator  | insulator |
| F5Hf1Rb1.ICSD_95846      | insulator  | insulator |
| F5I1N2O4.ICSD_406388     | insulator  | insulator |
| F5I1.ICSD_6021           | insulator  | insulator |
| F5K1Li1Y1.ICSD_39668     | insulator  | insulator |
| F5K1Na1Nb1O1.ICSD_422708 | insulator  | insulator |
| F5K1Te1.ICSD_26051       | insulator  | insulator |
| F5K2Pd1Rb1.ICSD_33887    | insulator  | insulator |
| F5K2Sb1.ICSD_24742       | insulator  | insulator |
| F5K2Sb1.ICSD_39634       | insulator  | insulator |
| F5K2Ti1.ICSD_261469      | insulator  | insulator |
| F5Li2Mn1.ICSD_202394     | insulator  | insulator |
| F5Lu3O2.ICSD_80365       | insulator  | insulator |
| F5Mn1Rb2.ICSD_82218      | insulator  | insulator |
| F5Mo1.ICSD_26644         | metal      | insulator |
| F5N3W1.ICSD_201198       | insulator  | insulator |
| F5Na1Te1.ICSD_202879     | insulator  | insulator |
| F5Na2Sb1.ICSD_28061      | insulator  | insulator |
| F5Nb1.ICSD_26647         | insulator  | insulator |
| F5O1Os1.ICSD_16872       | insulator  | insulator |
| F5O1Os1.ICSD_240332      | insulator  | insulator |
| F5O1Sn2.ICSD_409393      | insulator  | insulator |
| F5O2S1Sb1.ICSD_67273     | insulator  | insulator |
| F5O2Sb3.ICSD_62476       | insulator  | insulator |
| F5O4Tc1Xe1.ICSD_280249   | insulator  | insulator |
| F5P1.ICSD_62554          | insulator  | insulator |

Supplementary Table 370. Five-fold cross validated predictions for the metal/insulator classification (362/598).

| system                    | calculated | predicted |
|---------------------------|------------|-----------|
| F5Pd1Rb3.ICSD_35285       | insulator  | insulator |
| F5Pd2Rb1.ICSD_72299       | insulator  | insulator |
| F5Sb1Sr1.ICSD_68454       | insulator  | insulator |
| F5Ta1.ICSD_171155         | insulator  | insulator |
| F5Te1Ti1.ICSD_90619       | insulator  | insulator |
| F5Ti1Zr1.ICSD_26558       | insulator  | insulator |
| F5U1.ICSD_31657           | insulator  | insulator |
| F5U1.ICSD_659             | insulator  | insulator |
| F6Fe1H12N3.ICSD_96590     | metal      | insulator |
| F6Fe1H12O6Sn1.ICSD_68452  | insulator  | insulator |
| F6Fe1H8N2Na1.ICSD_418736  | insulator  | insulator |
| F6Fe1K1Rb2.ICSD_9001      | insulator  | insulator |
| F6Fe1K2Na1.ICSD_61277     | insulator  | insulator |
| F6Fe1Li1Mn1.ICSD_35231    | insulator  | insulator |
| F6Fe1Li1Mn1.ICSD_35233    | insulator  | insulator |
| F6Fe1Li1Rb2.ICSD_16400    | insulator  | insulator |
| F6Fe1Li1Sr1.ICSD_32729    | insulator  | insulator |
| F6Fe1Na1Rb2.ICSD_40966    | insulator  | insulator |
| F6Fe1Na1Rb2.ICSD_42146    | insulator  | insulator |
| F6Fe1Na3.ICSD_20157       | insulator  | insulator |
| F6Fe1Nb1.ICSD_63307       | insulator  | insulator |
| F6Fe1Nb1.ICSD_63309       | insulator  | insulator |
| F6Fe1Sn1.ICSD_25011       | metal      | insulator |
| F6Fe1Zr1.ICSD_35716       | metal      | insulator |
| F6Fe1Zr1.ICSD_35725       | insulator  | metal     |
| F6Fe2Li1.ICSD_202705      | insulator  | insulator |
| F6Fe2Rb1.ICSD_186747      | insulator  | insulator |
| F6Ga1H8N2Na1.ICSD_418737  | insulator  | insulator |
| F6Ga1K1Rb2.ICSD_416605    | insulator  | insulator |
| F6Ga1Li1Mn1.ICSD_4045     | insulator  | insulator |
| F6Ga1Li1Pd1.ICSD_78748    | insulator  | insulator |
| F6Ga1Li1Rb2.ICSD_50468    | insulator  | insulator |
| F6Ge1H12Mg1O6.ICSD_401096 | insulator  | insulator |
| F6Ge1K2.ICSD_24026        | insulator  | insulator |
| F6Ge1K2.ICSD_30310        | insulator  | insulator |
| F6Ge1Li2.ICSD_23406       | insulator  | insulator |
| F6Ge1Li2.ICSD_23407       | insulator  | insulator |
| F6Ge1Na2.ICSD_30344       | insulator  | insulator |
| F6Ge1Na2.ICSD_69623       | insulator  | insulator |
| F6Ge1Rb2.ICSD_25662       | insulator  | insulator |
| F6Ge1Rb2.ICSD_26633       | insulator  | insulator |
| F6Ge1Rb2.ICSD_68982       | insulator  | insulator |
| F6H10O4Si1.ICSD_40388     | insulator  | insulator |
| F6H12Mn1O6Ti1.ICSD_202786 | insulator  | insulator |
| F6H12Ni1O6Sn1.ICSD_75985  | insulator  | insulator |
| F6H12O6Sn2Zn1.ICSD_166589 | insulator  | insulator |
| F6H12O6Ti1Zn1.ICSD_62375  | insulator  | insulator |
| F6H2N3Sb1.ICSD_41354      | insulator  | insulator |
| F6H3O1Sb1.ICSD_66552      | insulator  | insulator |
| F6H6N2Si1.ICSD_35702      | insulator  | insulator |

Supplementary Table 371. Five-fold cross validated predictions for the metal/insulator classification (363/598).

| system                  | calculated | predicted |
|-------------------------|------------|-----------|
| F6H8In1N2Na1.ICSD_79099 | insulator  | insulator |
| F6H8N2Sn1.ICSD_409509   | insulator  | insulator |
| F6H8N2Ti1.ICSD_24834    | insulator  | insulator |
| F6H8N2Ti1.ICSD_24835    | insulator  | insulator |
| F6Hf1K2.ICSD_29514      | insulator  | insulator |
| F6Hf1K2.ICSD_47243      | insulator  | insulator |
| F6Hf1K2.ICSD_47244      | insulator  | insulator |
| F6Hf1K2.ICSD_47246      | insulator  | insulator |
| F6Hf1Rb2.ICSD_25599     | insulator  | insulator |
| F6Hf1V1.ICSD_94455      | insulator  | insulator |
| F6Hg1Rh1.ICSD_42163     | metal      | insulator |
| F6Hg2Mn2S1.ICSD_27328   | metal      | insulator |
| F6Hg2Ni2O1.ICSD_27329   | insulator  | insulator |
| F6Hg2Ni2S1.ICSD_4083    | insulator  | insulator |
| F6Hg2O1Zn2.ICSD_27330   | insulator  | insulator |
| F6Hg3Nb1.ICSD_62027     | metal      | insulator |
| F6Hg3S2Si1.ICSD_23605   | insulator  | insulator |
| F6Hg4O1.ICSD_99995      | metal      | insulator |
| F6Ho1Na1Rb2.ICSD_86273  | insulator  | insulator |
| F6Ho1Na1Rb2.ICSD_86274  | insulator  | insulator |
| F6I5Sb1.ICSD_27557      | insulator  | insulator |
| F6In1K2Na1.ICSD_22113   | insulator  | insulator |
| F6Ir1K2.ICSD_95779      | insulator  | insulator |
| F6Ir1Li1.ICSD_165207    | metal      | insulator |
| F6Ir1Rb2.ICSD_240955    | insulator  | insulator |
| F6Ir1.ICSD_171654       | insulator  | insulator |
| F6K1Mo1Rb2.ICSD_15773   | insulator  | insulator |
| F6K1Mo1Ti2.ICSD_15775   | insulator  | insulator |
| F6K1Na1Sn1.ICSD_39590   | insulator  | insulator |
| F6K1Nb1.ICSD_16729      | insulator  | insulator |
| F6K1Ni1Rb2.ICSD_42149   | metal      | insulator |
| F6K1Os1.ICSD_27664      | insulator  | insulator |
| F6K1P1.ICSD_25576       | insulator  | insulator |
| F6K1P1.ICSD_56255       | insulator  | insulator |
| F6K1Rb2Rh1.ICSD_27339   | insulator  | insulator |
| F6K1Rb2Sc1.ICSD_81679   | insulator  | insulator |
| F6K1Rb2Sc1.ICSD_81681   | insulator  | insulator |
| F6K1Rb2Sc1.ICSD_81683   | insulator  | insulator |
| F6K1Rb2Ti1.ICSD_42142   | insulator  | insulator |
| F6K1Rb2V1.ICSD_27345    | insulator  | insulator |
| F6K1Rb2Y1.ICSD_73472    | insulator  | insulator |
| F6K1Rh1.ICSD_165215     | insulator  | insulator |
| F6K1Ru1.ICSD_28692      | insulator  | insulator |
| F6K1Sb1.ICSD_42509      | insulator  | insulator |
| F6K1Sb1.ICSD_632        | insulator  | insulator |
| F6K1Sb1.ICSD_76422      | insulator  | insulator |
| F6K2Mn1Na1.ICSD_61117   | insulator  | insulator |
| F6K2Mn1.ICSD_47213      | insulator  | insulator |
| F6K2Mn1.ICSD_60417      | insulator  | insulator |
| F6K2Mo1Na1.ICSD_15777   | insulator  | insulator |

Supplementary Table 372. Five-fold cross validated predictions for the metal/insulator classification (364/598).

| system                  | calculated | predicted |
|-------------------------|------------|-----------|
| F6K2Na1Ni1_ICSD_42151   | insulator  | insulator |
| F6K2Na1Rh1_ICSD_27342   | insulator  | insulator |
| F6K2Na1Sc1_ICSD_22112   | insulator  | insulator |
| F6K2Na1Ti1_ICSD_22114   | insulator  | insulator |
| F6K2Na1V1_ICSD_186883   | insulator  | insulator |
| F6K2Na1Y1_ICSD_22115    | insulator  | insulator |
| F6K2Ni1_ICSD_6046       | insulator  | insulator |
| F6K2O3Ta2_ICSD_15866    | insulator  | insulator |
| F6K2Pd1_ICSD_27486      | insulator  | insulator |
| F6K2Pt1_ICSD_87360      | insulator  | insulator |
| F6K2Re1_ICSD_1528       | insulator  | insulator |
| F6K2Rh1_ICSD_28779      | insulator  | insulator |
| F6K2Si1_ICSD_158483     | insulator  | insulator |
| F6K2Si1_ICSD_38546      | insulator  | insulator |
| F6K2Tb1_ICSD_245618     | metal      | insulator |
| F6K2Th1_ICSD_31609      | insulator  | insulator |
| F6K2Ti1_ICSD_24659      | insulator  | insulator |
| F6K2U1_ICSD_31604       | insulator  | insulator |
| F6K2U1_ICSD_31610       | insulator  | insulator |
| F6K2Zr1_ICSD_14126      | insulator  | insulator |
| F6K2Zr1_ICSD_865        | insulator  | insulator |
| F6K3Mo1_ICSD_4403       | insulator  | insulator |
| F6K3N1O3Si1_ICSD_159390 | insulator  | insulator |
| F6K3W1_ICSD_51264       | insulator  | insulator |
| F6K3Y1_ICSD_416296      | insulator  | insulator |
| F6Li1Mn1Ti1_ICSD_69047  | insulator  | insulator |
| F6Li1Mn1V1_ICSD_167073  | insulator  | insulator |
| F6Li1Nb1_ICSD_165202    | insulator  | insulator |
| F6Li1Ni1Sr1_ICSD_32733  | insulator  | insulator |
| F6Li1Os1_ICSD_165214    | insulator  | insulator |
| F6Li1P1_ICSD_74830      | insulator  | insulator |
| F6Li1Pt1_ICSD_165208    | insulator  | insulator |
| F6Li1Rh1_ICSD_95776     | metal      | insulator |
| F6Li1Ru1_ICSD_165203    | insulator  | insulator |
| F6Li1Sb1_ICSD_23924     | insulator  | insulator |
| F6Li1Ta1_ICSD_165205    | insulator  | insulator |
| F6Li1V2_ICSD_35382      | insulator  | insulator |
| F6Li2Mn1_ICSD_15791     | insulator  | insulator |
| F6Li2Mo1_ICSD_23173     | insulator  | insulator |
| F6Li2Nb1_ICSD_201755    | insulator  | insulator |
| F6Li2O3Ta2_ICSD_405777  | insulator  | insulator |
| F6Li2Pd1_ICSD_165212    | insulator  | insulator |
| F6Li2Pd1_ICSD_26167     | metal      | insulator |
| F6Li2Pt1_ICSD_165216    | insulator  | insulator |
| F6Li2Pt1_ICSD_26168     | metal      | insulator |
| F6Li2Rh1_ICSD_165211    | insulator  | insulator |
| F6Li2Rh1_ICSD_6044      | insulator  | insulator |
| F6Li2Rh1_ICSD_95778     | metal      | insulator |
| F6Li2Ru1_ICSD_165210    | insulator  | insulator |
| F6Li2Ti1_ICSD_18313     | insulator  | insulator |

Supplementary Table 373. Five-fold cross validated predictions for the metal/insulator classification (365/598).

| system                 | calculated | predicted |
|------------------------|------------|-----------|
| F6Li2Zr1_ICSD_155020   | insulator  | insulator |
| F6Li2Zr1_ICSD_2644     | insulator  | insulator |
| F6Li2Zr1_ICSD_409667   | insulator  | insulator |
| F6Mg1Pb1_ICSD_15106    | insulator  | insulator |
| F6Mg1Pd1_ICSD_26163    | insulator  | insulator |
| F6Mg1Rh1_ICSD_42159    | insulator  | insulator |
| F6Mn1Na1Rb2_ICSD_9708  | insulator  | insulator |
| F6Mn1Na3_ICSD_66315    | insulator  | insulator |
| F6Mn1Pt1_ICSD_73114    | insulator  | insulator |
| F6Mn1Rb2_ICSD_25578    | insulator  | insulator |
| F6Mn1Rb2_ICSD_25579    | insulator  | insulator |
| F6Mn1Sn1_ICSD_25010    | insulator  | insulator |
| F6Mo1Na1Rb2_ICSD_15774 | insulator  | insulator |
| F6Mo1Na1Ti2_ICSD_15776 | insulator  | insulator |
| F6Mo1Na1_ICSD_27484    | metal      | insulator |
| F6Mo1_ICSD_171653      | insulator  | insulator |
| F6Mo1_ICSD_1879        | insulator  | insulator |
| F6N1Re1_ICSD_33543     | insulator  | insulator |
| F6N1S2Sb1_ICSD_170871  | insulator  | insulator |
| F6N3P3_ICSD_26649      | insulator  | insulator |
| F6Na1Ni1Rb2_ICSD_42150 | insulator  | insulator |
| F6Na1P1_ICSD_90615     | insulator  | insulator |
| F6Na1Rb2Rh1_ICSD_27341 | insulator  | insulator |
| F6Na1Rb2Ti1_ICSD_42143 | insulator  | insulator |
| F6Na1Rb2V1_ICSD_27346  | insulator  | insulator |
| F6Na1Rb2Y1_ICSD_25369  | insulator  | insulator |
| F6Na1Sb1_ICSD_25538    | insulator  | insulator |
| F6Na1Sb1_ICSD_56251    | insulator  | insulator |
| F6Na2Nb1_ICSD_201756   | insulator  | insulator |
| F6Na2Si1_ICSD_30348    | insulator  | insulator |
| F6Na2Si1_ICSD_40917    | insulator  | insulator |
| F6Na2Si1_ICSD_61274    | insulator  | insulator |
| F6Na2Sn1_ICSD_23156    | metal      | insulator |
| F6Na2Sn1_ICSD_68980    | insulator  | insulator |
| F6Na2Th1_ICSD_418145   | insulator  | insulator |
| F6Na2Ti1_ICSD_24477    | insulator  | insulator |
| F6Na2Ti1_ICSD_40916    | insulator  | insulator |
| F6Na2U1_ICSD_31605     | insulator  | insulator |
| F6Na2U1_ICSD_31623     | insulator  | insulator |
| F6Na2U1_ICSD_8034      | insulator  | insulator |
| F6Na2Zr1_ICSD_9877     | insulator  | insulator |
| F6Na3Nb1O1_ICSD_35761  | insulator  | insulator |
| F6Na3Ni1_ICSD_26073    | insulator  | insulator |
| F6Na3Sc1_ICSD_401761   | insulator  | insulator |
| F6Na3V1_ICSD_27347     | insulator  | insulator |
| F6Nb1Rb2_ICSD_72831    | insulator  | insulator |
| F6Nb1V1_ICSD_73353     | metal      | insulator |
| F6Ni1Pb1_ICSD_15108    | insulator  | insulator |
| F6Ni1Pt1_ICSD_78905    | insulator  | insulator |
| F6Ni1Rb2_ICSD_29005    | insulator  | insulator |

Supplementary Table 374. Five-fold cross validated predictions for the metal/insulator classification (366/598).

| system                  | calculated | predicted |
|-------------------------|------------|-----------|
| F6Ni1Rh1_ICSD_42164     | insulator  | insulator |
| F6Ni1Sn1_ICSD_25015     | insulator  | insulator |
| F6Ni1Sr1_ICSD_30114     | insulator  | insulator |
| F6Ni2Rb1_ICSD_31781     | insulator  | insulator |
| F6O1W1Xe1_ICSD_1853     | insulator  | insulator |
| F6O2P1Sb1_ICSD_51535    | insulator  | insulator |
| F6O2Pt1_ICSD_78851      | insulator  | insulator |
| F6O2Ru1_ICSD_78850      | metal      | insulator |
| F6O2Sb1_ICSD_78849      | insulator  | insulator |
| F6O4Pb1Zr3_ICSD_60959   | insulator  | insulator |
| F6O9Si2Ti1Y4_ICSD_20003 | insulator  | insulator |
| F6Os1_ICSD_171657       | insulator  | insulator |
| F6P1Ti1_ICSD_28899      | insulator  | insulator |
| F6Pa1Rb1_ICSD_36078     | insulator  | insulator |
| F6Pb1Pt1_ICSD_4057      | insulator  | insulator |
| F6Pb1Sr1_ICSD_25629     | metal      | insulator |
| F6Pb1Te1_ICSD_81865     | insulator  | insulator |
| F6Pb1Zn1_ICSD_15107     | insulator  | insulator |
| F6Pb1Zr1_ICSD_4051      | insulator  | insulator |
| F6Pb2_ICSD_23467        | insulator  | insulator |
| F6Pd1Pt1_ICSD_64661     | insulator  | insulator |
| F6Pd1Rb2_ICSD_28675     | insulator  | insulator |
| F6Pd1Zn1_ICSD_26165     | insulator  | insulator |
| F6Pd1Zr1_ICSD_73133     | insulator  | insulator |
| F6Pt1Rb2_ICSD_35108     | insulator  | insulator |
| F6Pt1Zn1_ICSD_37444     | insulator  | insulator |
| F6Rb1Ru1_ICSD_28693     | insulator  | insulator |
| F6Rb1Sb1_ICSD_408071    | insulator  | insulator |
| F6Rb2Rh1_ICSD_28780     | insulator  | insulator |
| F6Rb2Si1_ICSD_38547     | insulator  | insulator |
| F6Rb2Tb1_ICSD_99248     | metal      | insulator |
| F6Rb2Th1_ICSD_25829     | insulator  | insulator |
| F6Rb2U1_ICSD_14116      | insulator  | insulator |
| F6Rb2Zr1_ICSD_25597     | insulator  | insulator |
| F6Rb3Ti1_ICSD_19075     | insulator  | insulator |
| F6Rb3Y1_ICSD_19077      | insulator  | insulator |
| F6Rh1Sr1_ICSD_42158     | metal      | insulator |
| F6Rh1Zn1_ICSD_42161     | insulator  | insulator |
| F6S1_ICSD_214           | insulator  | insulator |
| F6S1_ICSD_41229         | insulator  | insulator |
| F6S1_ICSD_63334         | insulator  | insulator |
| F6S1_ICSD_71013         | insulator  | insulator |
| F6Sb1Ti1_ICSD_36264     | insulator  | insulator |
| F6Si1Ti2_ICSD_38549     | insulator  | insulator |
| F6Sn1Ti2_ICSD_410801    | insulator  | insulator |
| F6Sn1Zn1_ICSD_25012     | insulator  | insulator |
| F6Sn2_ICSD_33786        | insulator  | insulator |
| F6Te1_ICSD_67609        | insulator  | insulator |
| F6Ti1Ti2_ICSD_410802    | insulator  | insulator |
| F6Ti1Ti3_ICSD_42154     | metal      | insulator |

Supplementary Table 375. Five-fold cross validated predictions for the metal/insulator classification (367/598).

| system                  | calculated | predicted |
|-------------------------|------------|-----------|
| F6Ti1Zr1_ICSD_94456     | insulator  | insulator |
| F6U1_ICSD_9000          | insulator  | insulator |
| F6V1Zr1_ICSD_94454      | insulator  | insulator |
| F6W1_ICSD_36220         | insulator  | insulator |
| F6Xe2_ICSD_18128        | insulator  | insulator |
| F7Fe1Na2Ni1_ICSD_1511   | insulator  | insulator |
| F7Fe1Na2Ni1_ICSD_202870 | insulator  | insulator |
| F7Ga1Na2Ni1_ICSD_408111 | insulator  | insulator |
| F7Gd1Sn1_ICSD_78898     | insulator  | insulator |
| F7H1I1N1O1_ICSD_71582   | insulator  | insulator |
| F7H1K2Ti1_ICSD_187321   | insulator  | insulator |
| F7H1K3Nb1O1_ICSD_26620  | insulator  | insulator |
| F7Ho2K1_ICSD_27196      | insulator  | insulator |
| F7I1Xe1_ICSD_26059      | insulator  | insulator |
| F7I1_ICSD_18191         | insulator  | insulator |
| F7In1Sr2_ICSD_38307     | insulator  | insulator |
| F7In2K1_ICSD_1307       | insulator  | insulator |
| F7K1Sb2_ICSD_14118      | insulator  | insulator |
| F7K1Sc2_ICSD_47227      | insulator  | insulator |
| F7K1Ti2_ICSD_174209     | insulator  | insulator |
| F7K1Yb2_ICSD_16350      | insulator  | insulator |
| F7K2Nb1_ICSD_14132      | insulator  | insulator |
| F7K2Pa1_ICSD_24144      | insulator  | insulator |
| F7K2Ta1_ICSD_260876     | insulator  | insulator |
| F7K3N2O6Sb2_ICSD_200740 | metal      | insulator |
| F7K3Si1_ICSD_23875      | insulator  | insulator |
| F7La1Sn1_ICSD_78896     | insulator  | insulator |
| F7Li3Th1_ICSD_1726      | insulator  | insulator |
| F7Mn1Rb1Zr1_ICSD_78042  | insulator  | insulator |
| F7Mn1Rb3_ICSD_9599      | insulator  | insulator |
| F7Mn1Ti1Zr1_ICSD_78041  | insulator  | insulator |
| F7Na2Ni1V1_ICSD_407015  | insulator  | insulator |
| F7Ni1Rb3_ICSD_9601      | insulator  | insulator |
| F7Pb1Ta1_ICSD_417253    | insulator  | insulator |
| F7Pb2Rh1_ICSD_37141     | insulator  | insulator |
| F7Rb3Si1_ICSD_9589      | insulator  | insulator |
| F7Rb3Ti1_ICSD_9595      | insulator  | insulator |
| F7Re1_ICSD_78311        | insulator  | insulator |
| F7Sb1Xe1_ICSD_411868    | insulator  | insulator |
| F7Sc1Sr2_ICSD_74360     | insulator  | insulator |
| F7Sn1Ti1_ICSD_78899     | insulator  | insulator |
| F7Sn1Y1_ICSD_71586      | insulator  | insulator |
| F7Sn1Y1_ICSD_74963      | insulator  | insulator |
| F7Sr1Ta1_ICSD_417254    | insulator  | insulator |
| F8Fe3H4O2_ICSD_37140    | insulator  | insulator |
| F8Fe4O8Sr6_ICSD_262347  | metal      | insulator |
| F8H10In2N2O2_ICSD_97067 | insulator  | insulator |
| F8H12O6Zr2_ICSD_1309    | insulator  | insulator |
| F8H1K3Sn1_ICSD_26993    | insulator  | insulator |
| F8H1Na3Ti1_ICSD_14131   | insulator  | insulator |

Supplementary Table 376. Five-fold cross validated predictions for the metal/insulator classification (368/598).

| system                  | calculated | predicted |
|-------------------------|------------|-----------|
| F8I2Pb5.ICSD_36334      | insulator  | insulator |
| F8K3Ta1.ICSD_248063     | insulator  | insulator |
| F8Li1Na1Y2.ICSD_201623  | insulator  | insulator |
| F8Li1Na1Yb2.ICSD_202052 | insulator  | insulator |
| F8N2O2Xe1.ICSD_23535    | insulator  | insulator |
| F8N4P4.ICSD_31125       | insulator  | insulator |
| F8Na2U1.ICSD_165293     | insulator  | insulator |
| F8Na3Pa1.ICSD_16153     | insulator  | insulator |
| F8Na3Ta1.ICSD_260875    | insulator  | insulator |
| F8Sn3.ICSD_32592        | insulator  | insulator |
| F8Sn3.ICSD_61162        | insulator  | insulator |
| F9K1Te2.ICSD_84364      | insulator  | insulator |
| F9K1U2.ICSD_16065       | insulator  | insulator |
| F9K5Th1.ICSD_14127      | insulator  | insulator |
| F9Na1Th2.ICSD_245846    | insulator  | insulator |
| F9Nb1Se1.ICSD_9898      | insulator  | insulator |
| F9Sb1Xe2.ICSD_90622     | insulator  | insulator |
| F9U2.ICSD_27858         | metal      | insulator |
| Fe0.25S2Ta1.ICSD_417150 | metal      | metal     |
| Fe1.125Se1.ICSD_167195  | metal      | insulator |
| Fe11Si5.ICSD_77369      | metal      | metal     |
| Fe12Ho2P7.ICSD_632334   | metal      | metal     |
| Fe12O19Sr1.ICSD_16158   | metal      | metal     |
| Fe12P7Tb2.ICSD_633107   | metal      | metal     |
| Fe12P7Tb2.ICSD_633108   | metal      | metal     |
| Fe12P7Zr2.ICSD_25757    | metal      | metal     |
| Fe12Y1.ICSD_168236      | metal      | metal     |
| Fe13Ge3.ICSD_150584     | metal      | metal     |
| Fe16Hf6Si7.ICSD_150951  | metal      | metal     |
| Fe16N2.ICSD_185976      | metal      | metal     |
| Fe16Nb6Si7.ICSD_107097  | metal      | metal     |
| Fe16Si7Ta6.ICSD_107098  | metal      | metal     |
| Fe16Si7Zr6.ICSD_601928  | metal      | metal     |
| Fe17N3Nd2.ICSD_603452   | metal      | metal     |
| Fe17N3Nd2.ICSD_632695   | metal      | metal     |
| Fe17N3Pr2.ICSD_632713   | metal      | metal     |
| Fe17N3Tb2.ICSD_632743   | metal      | metal     |
| Fe17Nd2.ICSD_103550     | metal      | metal     |
| Fe17Nd2.ICSD_107530     | metal      | metal     |
| Fe17Nd2.ICSD_164327     | metal      | metal     |
| Fe17Pr2.ICSD_103593     | metal      | metal     |
| Fe17Tb2.ICSD_187854     | metal      | metal     |
| Fe17Tb2.ICSD_633846     | metal      | metal     |
| Fe17Th2.ICSD_656795     | metal      | metal     |
| Fe17Y2.ICSD_604267      | metal      | metal     |
| Fe17Y2.ICSD_634081      | metal      | metal     |
| Fe1Ga12Ho4.ICSD_249999  | metal      | metal     |
| Fe1Ga12Tb4.ICSD_249997  | metal      | metal     |
| Fe1Ga12U4.ICSD_156306   | metal      | metal     |
| Fe1Ga12Y4.ICSD_249996   | metal      | metal     |

Supplementary Table 377. Five-fold cross validated predictions for the metal/insulator classification (369/598).

| system                   | calculated | predicted |
|--------------------------|------------|-----------|
| Fe1Ga1Ni2.ICSD_187492    | metal      | metal     |
| Fe1Ga1Ti2.ICSD_185660    | metal      | metal     |
| Fe1Ga2Hf6.ICSD_631770    | metal      | metal     |
| Fe1Ga2S4.ICSD_100706     | insulator  | insulator |
| Fe1Ga2Se4.ICSD_631817    | insulator  | insulator |
| Fe1Ga3.ICSD_103447       | metal      | insulator |
| Fe1Ga3.ICSD_631760       | insulator  | metal     |
| Fe1Ga5U1.ICSD_600547     | metal      | metal     |
| Fe1Ga6Ge6Tb4.ICSD_281082 | metal      | metal     |
| Fe1Ga8Ho2.ICSD_180132    | metal      | metal     |
| Fe1Ga8Lu2.ICSD_600147    | metal      | metal     |
| Fe1Ga8Tb2.ICSD_600178    | metal      | metal     |
| Fe1Ga8Tm2.ICSD_106640    | metal      | metal     |
| Fe1Gd1O3.ICSD_16644      | metal      | insulator |
| Fe1Gd1Sb2.ICSD_657989    | metal      | metal     |
| Fe1Gd1Si1.ICSD_631952    | metal      | metal     |
| Fe1Ge1Hf1.ICSD_23577     | metal      | metal     |
| Fe1Ge1Hf1.ICSD_632036    | metal      | metal     |
| Fe1Ge1O3.ICSD_89787      | metal      | insulator |
| Fe1Ge1Sc1.ICSD_632114    | metal      | metal     |
| Fe1Ge1Si1.ICSD_150274    | insulator  | metal     |
| Fe1Ge1.ICSD_159921       | metal      | metal     |
| Fe1Ge1.ICSD_43055        | metal      | metal     |
| Fe1Ge1.ICSD_632006       | metal      | metal     |
| Fe1Ge1.ICSD_632022       | metal      | metal     |
| Fe1Ge2Ho1.ICSD_632046    | metal      | metal     |
| Fe1Ge2La1.ICSD_632049    | metal      | metal     |
| Fe1Ge2Li1O6.ICSD_162951  | insulator  | insulator |
| Fe1Ge2Na1O6.ICSD_180307  | insulator  | insulator |
| Fe1Ge2.ICSD_150276       | metal      | metal     |
| Fe1Ge2.ICSD_632024       | metal      | metal     |
| Fe1Ge3La1.ICSD_161874    | metal      | metal     |
| Fe1Ge3Pr1.ICSD_658628    | insulator  | metal     |
| Fe1H10N4O8S2.ICSD_240720 | insulator  | insulator |
| Fe1H1Li1O5P1.ICSD_167610 | insulator  | insulator |
| Fe1H1O2.ICSD_1544        | insulator  | insulator |
| Fe1H1O2.ICSD_167358      | insulator  | insulator |
| Fe1H1O2.ICSD_245057      | metal      | insulator |
| Fe1H1O2.ICSD_24885       | insulator  | insulator |
| Fe1H1Ti1.ICSD_602022     | metal      | metal     |
| Fe1H1.ICSD_187145        | metal      | metal     |
| Fe1H2K1O6P2.ICSD_423281  | insulator  | insulator |
| Fe1H2O5P1.ICSD_167029    | insulator  | insulator |
| Fe1H2O5S1.ICSD_71345     | insulator  | insulator |
| Fe1H2O5V1.ICSD_87710     | insulator  | insulator |
| Fe1H2O6P2Rb1.ICSD_423278 | insulator  | insulator |
| Fe1H2Ti1.ICSD_601978     | metal      | metal     |
| Fe1H3.ICSD_187146        | metal      | metal     |
| Fe1H3.ICSD_187147        | metal      | metal     |
| Fe1H4K1O14P4.ICSD_250262 | metal      | insulator |

Supplementary Table 378. Five-fold cross validated predictions for the metal/insulator classification (370/598).

| system                   | calculated | predicted |
|--------------------------|------------|-----------|
| Fe1H4K2O10S2.ICSD.87958  | insulator  | insulator |
| Fe1H4.ICSD.187148        | metal      | metal     |
| Fe1H5N1O10P3.ICSD.20782  | insulator  | insulator |
| Fe1H6Mg2.ICSD.107500     | insulator  | insulator |
| Fe1H6Sr2.ICSD.632211     | insulator  | insulator |
| Fe1H8O12Re2.ICSD.402963  | insulator  | insulator |
| Fe1Hf1P1.ICSD.86280      | metal      | metal     |
| Fe1Hf1Si1.ICSD.632263    | metal      | metal     |
| Fe1Hf1Si2.ICSD.62614     | metal      | metal     |
| Fe1Hf2.ICSD.632245       | metal      | metal     |
| Fe1Hf4P1.ICSD.632255     | metal      | metal     |
| Fe1Hf9Mo4.ICSD.632254    | metal      | metal     |
| Fe1Hf9Re4.ICSD.632258    | metal      | metal     |
| Fe1Hf9W4.ICSD.632275     | metal      | metal     |
| Fe1Ho1Si1.ICSD.632349    | metal      | metal     |
| Fe1Ho6Sb2.ICSD.96251     | metal      | metal     |
| Fe1Ho7I12.ICSD.260155    | metal      | metal     |
| Fe1I2.ICSD.52369         | metal      | insulator |
| Fe1I3O9.ICSD.286         | insulator  | insulator |
| Fe1I3Ti1.ICSD.26422      | insulator  | insulator |
| Fe1I4Rb2.ICSD.8010       | insulator  | insulator |
| Fe1In1O3.ICSD.80469      | insulator  | metal     |
| Fe1In1Ti2.ICSD.185661    | metal      | metal     |
| Fe1In2S4.ICSD.632381     | insulator  | insulator |
| Fe1Ir3.ICSD.56264        | metal      | metal     |
| Fe1K1Mo2O8.ICSD.153864   | insulator  | insulator |
| Fe1K1Mo2O8.ICSD.28020    | insulator  | insulator |
| Fe1K1O2.ICSD.421186      | insulator  | insulator |
| Fe1K1O8S2.ICSD.26004     | insulator  | insulator |
| Fe1K1S2.ICSD.632398      | metal      | insulator |
| Fe1K1S2.ICSD.68383       | insulator  | metal     |
| Fe1K1Se2.ICSD.40780      | metal      | insulator |
| Fe1K2Li3O4.ICSD.33280    | insulator  | insulator |
| Fe1K2Na1O3.ICSD.36380    | insulator  | insulator |
| Fe1K2O4.ICSD.2876        | insulator  | insulator |
| Fe1K2P2S6.ICSD.300226    | insulator  | insulator |
| Fe1K2P2S6.ICSD.657803    | insulator  | insulator |
| Fe1K2P2Se6.ICSD.165358   | insulator  | insulator |
| Fe1K3O2.ICSD.73215       | insulator  | insulator |
| Fe1K3Se3.ICSD.89586      | insulator  | insulator |
| Fe1La1O1P1.ICSD.391428   | metal      | metal     |
| Fe1La1O3.ICSD.236176     | insulator  | metal     |
| Fe1La1O3.ICSD.29118      | insulator  | metal     |
| Fe1La1Sb2.ICSD.657914    | metal      | metal     |
| Fe1La1Si1.ICSD.85853     | metal      | metal     |
| Fe1La1Si2.ICSD.632434    | metal      | metal     |
| Fe1La3Mn1S7.ICSD.35581   | insulator  | insulator |
| Fe1La3Ni1S7.ICSD.603955  | insulator  | insulator |
| Fe1La3O6S3W1.ICSD.380402 | insulator  | insulator |
| Fe1La3O6.ICSD.421426     | insulator  | insulator |

Supplementary Table 379. Five-fold cross validated predictions for the metal/insulator classification (371/598).

| system                  | calculated | predicted |
|-------------------------|------------|-----------|
| Fe1La4O1Se6.ICSD.391306 | insulator  | insulator |
| Fe1La4S7.ICSD.632416    | insulator  | insulator |
| Fe1La5O16Re3.ICSD.96339 | insulator  | insulator |
| Fe1Li1Mo2O8.ICSD.241134 | insulator  | insulator |
| Fe1Li1O2.ICSD.51759     | metal      | metal     |
| Fe1Li1O2.ICSD.78712     | metal      | metal     |
| Fe1Li1O4P1.ICSD.161479  | insulator  | insulator |
| Fe1Li1O4P1.ICSD.97766   | insulator  | insulator |
| Fe1Li1O4Si1.ICSD.183763 | insulator  | insulator |
| Fe1Li1O4Si1.ICSD.186523 | insulator  | insulator |
| Fe1Li1O6Si2.ICSD.9669   | insulator  | insulator |
| Fe1Li1O7P2.ICSD.95751   | insulator  | insulator |
| Fe1Li1O8W2.ICSD.16170   | insulator  | insulator |
| Fe1Li1O9P3.ICSD.20610   | insulator  | insulator |
| Fe1Li1P1.ICSD.166456    | metal      | metal     |
| Fe1Li1P1.ICSD.187134    | metal      | metal     |
| Fe1Li1P1.ICSD.187135    | insulator  | metal     |
| Fe1Li2O4Si1.ICSD.161306 | insulator  | insulator |
| Fe1Li2O4Si1.ICSD.185581 | insulator  | insulator |
| Fe1Li2O4Si1.ICSD.261336 | insulator  | insulator |
| Fe1Li2S2.ICSD.632443    | metal      | metal     |
| Fe1Li3N2.ICSD.68523     | metal      | insulator |
| Fe1Li4N2.ICSD.68700     | insulator  | metal     |
| Fe1Lu2S4.ICSD.37422     | metal      | metal     |
| Fe1Lu6Sb2.ICSD.96249    | metal      | metal     |
| Fe1Mn1P1.ICSD.632538    | metal      | metal     |
| Fe1Mn1P1.ICSD.632548    | metal      | metal     |
| Fe1Mn2N8Sr8.ICSD.409950 | metal      | metal     |
| Fe1Mo1O4.ICSD.43012     | insulator  | insulator |
| Fe1Mo1O6Sr2.ICSD.169377 | insulator  | insulator |
| Fe1Mo1O6Sr2.ICSD.172212 | insulator  | insulator |
| Fe1Mo1O7V1.ICSD.408562  | insulator  | insulator |
| Fe1Mo1P1.ICSD.632646    | metal      | metal     |
| Fe1Mo2Na1O8.ICSD.166610 | insulator  | insulator |
| Fe1Mo2O8Rb1.ICSD.245665 | metal      | insulator |
| Fe1Mo2O8Rb1.ICSD.245666 | metal      | insulator |
| Fe1Mo2S4.ICSD.94749     | insulator  | metal     |
| Fe1Mo2S4.ICSD.94751     | insulator  | metal     |
| Fe1Mo4Zr9.ICSD.632686   | metal      | metal     |
| Fe1Mo6S8.ICSD.632656    | metal      | metal     |
| Fe1N1Ni1.ICSD.53505     | metal      | metal     |
| Fe1N1.ICSD.184375       | metal      | metal     |
| Fe1N1.ICSD.41258        | metal      | metal     |
| Fe1N2Sr2.ICSD.72390     | insulator  | metal     |
| Fe1N2W1.ICSD.81488      | metal      | metal     |
| Fe1Na1O2.ICSD.27117     | insulator  | insulator |
| Fe1Na1O2.ICSD.33775     | insulator  | insulator |
| Fe1Na1O2.ICSD.75588     | metal      | insulator |
| Fe1Na1O4P1.ICSD.56292   | insulator  | insulator |
| Fe1Na1O4Ti1.ICSD.36090  | insulator  | insulator |

Supplementary Table 380. Five-fold cross validated predictions for the metal/insulator classification (372/598).

| system                 | calculated | predicted |
|------------------------|------------|-----------|
| Fe1Na1O6Si2.ICSD_10221 | insulator  | insulator |
| Fe1Na1O8S2.ICSD_166768 | insulator  | insulator |
| Fe1Na1O8Se2.ICSD_74001 | insulator  | insulator |
| Fe1Na1O8W2.ICSD_161847 | insulator  | insulator |
| Fe1Na1S2.ICSD_37026    | insulator  | metal     |
| Fe1Na2O4.ICSD_50478    | insulator  | insulator |
| Fe1Na3O8P2.ICSD_93790  | insulator  | insulator |
| Fe1Na4O3.ICSD_1410     | insulator  | insulator |
| Fe1Na4O4.ICSD_89702    | insulator  | insulator |
| Fe1Na6S4.ICSD_72303    | insulator  | insulator |
| Fe1Na6Se4.ICSD_72304   | insulator  | insulator |
| Fe1Nb1O4.ICSD_14016    | insulator  | insulator |
| Fe1Nb1O4.ICSD_429      | insulator  | insulator |
| Fe1Nb1O4.ICSD_8128     | insulator  | insulator |
| Fe1Nb1P1.ICSD_632794   | metal      | metal     |
| Fe1Nb1Sb1.ICSD_83928   | insulator  | insulator |
| Fe1Nb1Si1.ICSD_632827  | metal      | metal     |
| Fe1Nb1Te2.ICSD_71520   | metal      | metal     |
| Fe1Nb2O6.ICSD_31943    | insulator  | insulator |
| Fe1Nb2S4.ICSD_632799   | metal      | metal     |
| Fe1Nb2Se4.ICSD_632807  | metal      | metal     |
| Fe1Nb3S6.ICSD_42687    | metal      | metal     |
| Fe1Nb3.ICSD_188227     | metal      | metal     |
| Fe1Nb3.ICSD_188251     | metal      | metal     |
| Fe1Nb4P1.ICSD_632795   | metal      | metal     |
| Fe1Nb4S8.ICSD_632800   | metal      | metal     |
| Fe1Nb4Se8.ICSD_632812  | metal      | metal     |
| Fe1Nb4Si1.ICSD_632825  | metal      | metal     |
| Fe1Nd1Si1.ICSD_85854   | metal      | metal     |
| Fe1Nd1Si2.ICSD_67089   | metal      | metal     |
| Fe1Ni1P1.ICSD_632939   | metal      | metal     |
| Fe1Ni1Pt2.ICSD_42564   | metal      | metal     |
| Fe1Ni1Si1.ICSD_165243  | metal      | metal     |
| Fe1Ni1Si1.ICSD_165244  | metal      | metal     |
| Fe1Ni1.ICSD_103555     | metal      | metal     |
| Fe1Ni2O4.ICSD_109150   | metal      | metal     |
| Fe1Ni2S4.ICSD_42590    | metal      | metal     |
| Fe1Ni2Se4.ICSD_632972  | metal      | metal     |
| Fe1Ni2.ICSD_188272     | metal      | metal     |
| Fe1Ni3.ICSD_188242     | metal      | metal     |
| Fe1Ni3.ICSD_188254     | metal      | metal     |
| Fe1Ni3.ICSD_632929     | metal      | metal     |
| Fe1O13Te6.ICSD_417293  | insulator  | insulator |
| Fe1O1P1Pr1.ICSD_80200  | metal      | metal     |
| Fe1O1.ICSD_633029      | metal      | metal     |
| Fe1O1.ICSD_82236       | metal      | metal     |
| Fe1O2Rb1.ICSD_421188   | insulator  | insulator |
| Fe1O2Sr1.ICSD_418606   | metal      | metal     |
| Fe1O2Ti1.ICSD_29011    | insulator  | insulator |
| Fe1O3Si1.ICSD_75929    | insulator  | insulator |

Supplementary Table 381. Five-fold cross validated predictions for the metal/insulator classification (373/598).

| system                  | calculated | predicted |
|-------------------------|------------|-----------|
| Fe1O3Sr1.ICSD_92335     | metal      | metal     |
| Fe1O3Ti1.ICSD_246515    | insulator  | insulator |
| Fe1O3Ti1.ICSD_246516    | insulator  | insulator |
| Fe1O3Ti1.ICSD_30665     | insulator  | insulator |
| Fe1O3Y1.ICSD_23822      | metal      | insulator |
| Fe1O3Zr1.ICSD_247122    | insulator  | insulator |
| Fe1O4P1.ICSD_155065     | insulator  | insulator |
| Fe1O4P1.ICSD_281079     | insulator  | insulator |
| Fe1O4P1.ICSD_290337     | insulator  | insulator |
| Fe1O4P1.ICSD_38062      | insulator  | insulator |
| Fe1O4P1.ICSD_412735     | insulator  | insulator |
| Fe1O4S1.ICSD_23507      | insulator  | insulator |
| Fe1O4S1.ICSD_240947     | insulator  | insulator |
| Fe1O4Sb2.ICSD_155152    | insulator  | insulator |
| Fe1O4Sb2.ICSD_4459      | insulator  | insulator |
| Fe1O4Si1.ICSD_186518    | metal      | insulator |
| Fe1O4Si1.ICSD_186521    | insulator  | insulator |
| Fe1O4Si1.ICSD_186524    | metal      | insulator |
| Fe1O4Sr2.ICSD_74421     | metal      | metal     |
| Fe1O4U1.ICSD_15709      | insulator  | insulator |
| Fe1O4V1.ICSD_82161      | insulator  | insulator |
| Fe1O4V2.ICSD_109149     | metal      | metal     |
| Fe1O4V2.ICSD_28962      | metal      | metal     |
| Fe1O4W1.ICSD_26811      | insulator  | insulator |
| Fe1O5Ti2.ICSD_37231     | insulator  | insulator |
| Fe1O6Re1Sr2.ICSD_150702 | metal      | metal     |
| Fe1O6Sb2.ICSD_40344     | metal      | insulator |
| Fe1O6Sr2W1.ICSD_78677   | metal      | insulator |
| Fe1O6Sr2W1.ICSD_78678   | insulator  | metal     |
| Fe1O6Ta2.ICSD_201754    | insulator  | insulator |
| Fe1O7Rb1Se2.ICSD_90415  | insulator  | insulator |
| Fe1O8Rb1Se2.ICSD_75550  | insulator  | insulator |
| Fe1P1S1.ICSD_633086     | metal      | insulator |
| Fe1P1S3.ICSD_61392      | insulator  | insulator |
| Fe1P1Se1.ICSD_633093    | metal      | insulator |
| Fe1P1Se3.ICSD_86272     | metal      | insulator |
| Fe1P1Ta1.ICSD_633105    | metal      | metal     |
| Fe1P1Ta4.ICSD_86378     | metal      | metal     |
| Fe1P1Ti1.ICSD_633111    | metal      | metal     |
| Fe1P1V1.ICSD_633116     | metal      | metal     |
| Fe1P1Zr1.ICSD_43204     | metal      | metal     |
| Fe1P1.ICSD_633046       | metal      | metal     |
| Fe1P2.ICSD_42904        | insulator  | metal     |
| Fe1P4Si4.ICSD_79005     | insulator  | insulator |
| Fe1P4.ICSD_2413         | insulator  | insulator |
| Fe1P4.ICSD_2442         | insulator  | insulator |
| Fe1P4.ICSD_65415        | insulator  | insulator |
| Fe1Pd1.ICSD_180896      | metal      | metal     |
| Fe1Pd1.ICSD_633142      | metal      | metal     |
| Fe1Pd2Se2.ICSD_416515   | metal      | metal     |

Supplementary Table 382. Five-fold cross validated predictions for the metal/insulator classification (374/598).

| system                | calculated | predicted |
|-----------------------|------------|-----------|
| Fe1Pd3_ICSD_103582    | metal      | metal     |
| Fe1Pr1Sb2_ICSD_657916 | metal      | metal     |
| Fe1Pr1Sb3_ICSD_168458 | metal      | metal     |
| Fe1Pr1Si1_ICSD_633164 | metal      | metal     |
| Fe1Pr1Si2_ICSD_67087  | metal      | metal     |
| Fe1Pt1Sb1_ICSD_633196 | metal      | metal     |
| Fe1Pt1_ICSD_42589     | metal      | metal     |
| Fe1Pt1_ICSD_633191    | metal      | metal     |
| Fe1Pt1_ICSD_659004    | metal      | metal     |
| Fe1Pt3_ICSD_633188    | metal      | metal     |
| Fe1Rb1S2_ICSD_202384  | metal      | insulator |
| Fe1Rb1S2_ICSD_633207  | insulator  | insulator |
| Fe1Rb1Se2_ICSD_40781  | insulator  | metal     |
| Fe1Rh1_ICSD_108465    | metal      | metal     |
| Fe1Rh2S4_ICSD_633231  | metal      | metal     |
| Fe1Rh2Se4_ICSD_603354 | insulator  | metal     |
| Fe1Rh2Sn1_ICSD_633234 | metal      | metal     |
| Fe1Ru2Si1_ICSD_633245 | metal      | metal     |
| Fe1Ru2Sn1_ICSD_103615 | metal      | metal     |
| Fe1S17U8_ICSD_633354  | insulator  | insulator |
| Fe1S1Sb1_ICSD_24161   | insulator  | metal     |
| Fe1S1_ICSD_29302      | metal      | metal     |
| Fe1S1_ICSD_35006      | insulator  | metal     |
| Fe1S1_ICSD_43694      | insulator  | metal     |
| Fe1S1_ICSD_51003      | metal      | insulator |
| Fe1S1_ICSD_53528      | metal      | metal     |
| Fe1S1_ICSD_633265     | insulator  | metal     |
| Fe1S1_ICSD_68845      | insulator  | metal     |
| Fe1S1_ICSD_68847      | metal      | insulator |
| Fe1S1_ICSD_68848      | metal      | insulator |
| Fe1S1_ICSD_87499      | metal      | insulator |
| Fe1S1_ICSD_87501      | insulator  | metal     |
| Fe1S1_ICSD_87502      | metal      | metal     |
| Fe1S1_ICSD_87503      | insulator  | metal     |
| Fe1S2Ti1_ICSD_150822  | metal      | metal     |
| Fe1S2Ti1_ICSD_63381   | insulator  | metal     |
| Fe1S2_ICSD_109374     | insulator  | insulator |
| Fe1S2_ICSD_633289     | insulator  | insulator |
| Fe1S4Sb2_ICSD_93911   | insulator  | insulator |
| Fe1S4Sc2_ICSD_74405   | metal      | insulator |
| Fe1S4Ti2_ICSD_42563   | metal      | metal     |
| Fe1S4V2_ICSD_35634    | insulator  | metal     |
| Fe1S4V2_ICSD_633355   | metal      | insulator |
| Fe1S4V2_ICSD_633361   | metal      | insulator |
| Fe1S4Yb2_ICSD_37419   | metal      | metal     |
| Fe1S5Th2_ICSD_633325  | insulator  | insulator |
| Fe1S5U2_ICSD_41899    | insulator  | insulator |
| Fe1S6Ti3_ICSD_53533   | insulator  | metal     |
| Fe1S8Ti4_ICSD_53534   | metal      | metal     |
| Fe1Sb1Se1_ICSD_633399 | metal      | insulator |

Supplementary Table 383. Five-fold cross validated predictions for the metal/insulator classification (375/598).

| system                 | calculated | predicted |
|------------------------|------------|-----------|
| Fe1Sb1Te1_ICSD_633405  | metal      | metal     |
| Fe1Sb1Ti1_ICSD_53537   | metal      | metal     |
| Fe1Sb1V1_ICSD_181132   | metal      | metal     |
| Fe1Sb1V1_ICSD_53539    | insulator  | metal     |
| Fe1Sb1Zn1_ICSD_90397   | metal      | metal     |
| Fe1Sb1_ICSD_53535      | metal      | metal     |
| Fe1Sb1_ICSD_53971      | metal      | metal     |
| Fe1Sb1_ICSD_633396     | metal      | metal     |
| Fe1Sb2Sc6_ICSD_96247   | metal      | metal     |
| Fe1Sb2Tb6_ICSD_154772  | metal      | metal     |
| Fe1Sb2Ti5_ICSD_96143   | metal      | metal     |
| Fe1Sb2Tm6_ICSD_96252   | metal      | metal     |
| Fe1Sb2Y6_ICSD_96248    | metal      | metal     |
| Fe1Sb2Zr6_ICSD_156949  | metal      | metal     |
| Fe1Sb2_ICSD_186635     | insulator  | metal     |
| Fe1Sb2_ICSD_186640     | metal      | metal     |
| Fe1Sb2_ICSD_633389     | metal      | insulator |
| Fe1Sc1Si1_ICSD_84203   | metal      | metal     |
| Fe1Sc2Si2_ICSD_633455  | metal      | metal     |
| Fe1Sc2Si2_ICSD_84205   | metal      | metal     |
| Fe1Sc6Te2_ICSD_90081   | metal      | metal     |
| Fe1Se0.875_ICSD_167196 | insulator  | metal     |
| Fe1Se1_ICSD_163557     | metal      | metal     |
| Fe1Se1_ICSD_165957     | insulator  | metal     |
| Fe1Se1_ICSD_169271     | metal      | metal     |
| Fe1Se1_ICSD_169307     | metal      | metal     |
| Fe1Se1_ICSD_182545     | metal      | insulator |
| Fe1Se1_ICSD_185465     | insulator  | metal     |
| Fe1Se1_ICSD_53541      | metal      | metal     |
| Fe1Se1_ICSD_53542      | insulator  | metal     |
| Fe1Se1_ICSD_633467     | metal      | metal     |
| Fe1Se1_ICSD_633480     | metal      | metal     |
| Fe1Se2Ti1_ICSD_100354  | metal      | insulator |
| Fe1Se2Ti1_ICSD_633509  | metal      | metal     |
| Fe1Se2_ICSD_633475     | insulator  | metal     |
| Fe1Se2_ICSD_633489     | insulator  | metal     |
| Fe1Se4Ti2_ICSD_633504  | insulator  | metal     |
| Fe1Se5Th2_ICSD_633494  | insulator  | insulator |
| Fe1Se5U2_ICSD_601612   | metal      | insulator |
| Fe1Si1Ta1_ICSD_633568  | metal      | metal     |
| Fe1Si1Tb1_ICSD_57297   | metal      | metal     |
| Fe1Si1Tb1_ICSD_633578  | metal      | metal     |
| Fe1Si1Ti1_ICSD_41157   | metal      | metal     |
| Fe1Si1U1_ICSD_55537    | metal      | metal     |
| Fe1Si1Y1_ICSD_633643   | metal      | metal     |
| Fe1Si1Yb1_ICSD_633660  | metal      | metal     |
| Fe1Si1Zr1_ICSD_633674  | metal      | metal     |
| Fe1Si1_ICSD_52334      | metal      | insulator |
| Fe1Si1_ICSD_81495      | insulator  | metal     |
| Fe1Si2Tb2_ICSD_99215   | metal      | metal     |

Supplementary Table 384. Five-fold cross validated predictions for the metal/insulator classification (376/598).

| system                | calculated | predicted |
|-----------------------|------------|-----------|
| Fe1Si2Ti1_ICSD_166099 | metal      | metal     |
| Fe1Si2Ti1_ICSD_31992  | metal      | metal     |
| Fe1Si2_ICSD_23408     | insulator  | metal     |
| Fe1Si2_ICSD_633533    | metal      | metal     |
| Fe1Sn1Ti1_ICSD_106680 | metal      | metal     |
| Fe1Sn1_ICSD_150620    | metal      | metal     |
| Fe1Sn1_ICSD_150691    | metal      | metal     |
| Fe1Sn1_ICSD_633747    | metal      | metal     |
| Fe1Sn2_ICSD_633761    | metal      | metal     |
| Fe1Ta1Te3_ICSD_66513  | metal      | metal     |
| Fe1Te1_ICSD_180602    | metal      | metal     |
| Fe1Te1_ICSD_56142     | metal      | metal     |
| Fe1Te2Zr6_ICSD_82530  | metal      | metal     |
| Fe1Te2_ICSD_633866    | insulator  | metal     |
| Fe1Te2_ICSD_633869    | metal      | metal     |
| Fe1Ti1_ICSD_96139     | metal      | metal     |
| Fe1Ti2_ICSD_633947    | metal      | metal     |
| Fe1U6_ICSD_103678     | metal      | metal     |
| Fe1V1_ICSD_103681     | metal      | metal     |
| Fe1V3_ICSD_634028     | metal      | metal     |
| Fe1Zn13_ICSD_240050   | metal      | metal     |
| Fe1Zr2_ICSD_102804    | metal      | metal     |
| Fe1Zr2_ICSD_103713    | metal      | metal     |
| Fe1Zr2_ICSD_634145    | metal      | metal     |
| Fe1Zr3_ICSD_634167    | metal      | metal     |
| Fe1_ICSD_165727       | metal      | metal     |
| Fe1_ICSD_171002       | metal      | metal     |
| Fe1_ICSD_185725       | metal      | metal     |
| Fe1_ICSD_185737       | metal      | metal     |
| Fe1_ICSD_44863        | metal      | metal     |
| Fe1_ICSD_631723       | metal      | metal     |
| Fe1_ICSD_631727       | metal      | metal     |
| Fe1_ICSD_631730       | metal      | metal     |
| Fe23Ho6_ICSD_103503   | metal      | metal     |
| Fe23Lu6_ICSD_632454   | metal      | metal     |
| Fe23Tb6_ICSD_633832   | metal      | metal     |
| Fe23Y6_ICSD_634086    | metal      | metal     |
| Fe23Yb6_ICSD_634132   | metal      | metal     |
| Fe23Zr6_ICSD_634176   | metal      | metal     |
| Fe2Ga1Mn1_ICSD_186721 | metal      | metal     |
| Fe2Ga1Mn1_ICSD_186722 | metal      | metal     |
| Fe2Ga1Ni1_ICSD_103460 | metal      | metal     |
| Fe2Ga1Ti1_ICSD_103469 | metal      | metal     |
| Fe2Ga1V1_ICSD_631850  | insulator  | metal     |
| Fe2Ga2S5_ICSD_49912   | metal      | insulator |
| Fe2Ga2S5_ICSD_631804  | insulator  | metal     |
| Fe2Gd1Ge2_ICSD_106825 | metal      | metal     |
| Fe2Gd1_ICSD_103477    | metal      | metal     |
| Fe2Gd1_ICSD_631879    | metal      | metal     |
| Fe2Gd2I1_ICSD_73157   | metal      | metal     |

Supplementary Table 385. Five-fold cross validated predictions for the metal/insulator classification (377/598).

| system                    | calculated | predicted |
|---------------------------|------------|-----------|
| Fe2Ge1Mn1_ICSD_186065     | metal      | metal     |
| Fe2Ge1Mo3N1_ICSD_185929   | metal      | metal     |
| Fe2Ge1O4_ICSD_93973       | insulator  | metal     |
| Fe2Ge1S4_ICSD_23526       | insulator  | insulator |
| Fe2Ge1Se4_ICSD_87086      | insulator  | insulator |
| Fe2Ge1Ti1_ICSD_186057     | insulator  | metal     |
| Fe2Ge1_ICSD_108442        | metal      | metal     |
| Fe2Ge1_ICSD_632005        | metal      | metal     |
| Fe2Ge1_ICSD_632028        | metal      | metal     |
| Fe2Ge2Ho1_ICSD_164212     | metal      | metal     |
| Fe2Ge2La1_ICSD_81747      | metal      | metal     |
| Fe2Ge2Nd1_ICSD_53467      | metal      | metal     |
| Fe2Ge2Pr1_ICSD_53472      | metal      | metal     |
| Fe2Ge2Tb1_ICSD_632133     | metal      | metal     |
| Fe2Ge2Th1_ICSD_55341      | metal      | metal     |
| Fe2Ge2Tm1_ICSD_106829     | metal      | metal     |
| Fe2Ge2Y1_ICSD_81745       | metal      | metal     |
| Fe2Ge2Yb1_ICSD_53482      | metal      | metal     |
| Fe2Ge2Yb1_ICSD_632164     | metal      | metal     |
| Fe2Ge3Mn3O12_ICSD_18111   | insulator  | insulator |
| Fe2H1Na1O8P2_ICSD_171329  | insulator  | insulator |
| Fe2H1O9Sb1Si2_ICSD_200068 | insulator  | insulator |
| Fe2H2O1Zr4_ICSD_108768    | metal      | metal     |
| Fe2Hf1Si2_ICSD_20933      | metal      | metal     |
| Fe2Hf1_ICSD_632242        | metal      | metal     |
| Fe2Hf1_ICSD_632247        | metal      | metal     |
| Fe2Hf1_ICSD_632249        | metal      | metal     |
| Fe2Hf1_ICSD_632252        | metal      | metal     |
| Fe2Hf3Si3_ICSD_632265     | metal      | metal     |
| Fe2Ho1Si2_ICSD_632346     | metal      | metal     |
| Fe2Ho1_ICSD_632290        | metal      | metal     |
| Fe2Ho1_ICSD_632293        | metal      | metal     |
| Fe2I1La2_ICSD_409622      | metal      | metal     |
| Fe2In1O4_ICSD_157323      | metal      | metal     |
| Fe2In1Ti1_ICSD_186056     | metal      | metal     |
| Fe2K1S2_ICSD_186572       | insulator  | metal     |
| Fe2K1S3_ICSD_100180       | metal      | insulator |
| Fe2K1S3_ICSD_99507        | insulator  | metal     |
| Fe2K1Se2_ICSD_186573      | metal      | metal     |
| Fe2K1Se3_ICSD_424672      | metal      | metal     |
| Fe2K1Te2_ICSD_186574      | metal      | metal     |
| Fe2K2Na4O6_ICSD_36612     | insulator  | insulator |
| Fe2K2Nb4O13_ICSD_50038    | insulator  | insulator |
| Fe2K3Na1O8_ICSD_159909    | insulator  | insulator |
| Fe2K3O4_ICSD_94465        | metal      | insulator |
| Fe2K4O5_ICSD_154372       | insulator  | insulator |
| Fe2K6O5_ICSD_174312       | insulator  | insulator |
| Fe2K6O6_ICSD_6149         | insulator  | insulator |
| Fe2K6S6_ICSD_425068       | insulator  | insulator |
| Fe2K9O8_ICSD_174307       | metal      | insulator |

Supplementary Table 386. Five-fold cross validated predictions for the metal/insulator classification (378/598).

| system                   | calculated | predicted |
|--------------------------|------------|-----------|
| Fe2La1P2.ICSD.632411     | metal      | metal     |
| Fe2La1Si2.ICSD.53491     | metal      | metal     |
| Fe2La2O3Se2.ICSD.183143  | metal      | insulator |
| Fe2La2S5.ICSD.1478       | insulator  | insulator |
| Fe2La3S7.ICSD.603953     | insulator  | insulator |
| Fe2Li1N3Sr2.ICSD.71059   | metal      | metal     |
| Fe2Li2O4.ICSD.31149      | insulator  | metal     |
| Fe2Lu1Si2.ICSD.632475    | metal      | metal     |
| Fe2Lu1.ICSD.103515       | metal      | metal     |
| Fe2Mg1O4.ICSD.157694     | insulator  | insulator |
| Fe2Mg1O4.ICSD.24493      | insulator  | metal     |
| Fe2Mg1O4.ICSD.94080      | insulator  | insulator |
| Fe2Mg3O12Si3.ICSD.27373  | insulator  | insulator |
| Fe2Mn1O4.ICSD.170910     | insulator  | insulator |
| Fe2Mn1O4.ICSD.24497      | insulator  | insulator |
| Fe2Mn1Si1.ICSD.659018    | metal      | metal     |
| Fe2Mn3O12Si3.ICSD.77433  | metal      | insulator |
| Fe2Mo1.ICSD.632621       | metal      | metal     |
| Fe2Mo1.ICSD.632626       | metal      | metal     |
| Fe2Mo3Na1O12.ICSD.281398 | metal      | insulator |
| Fe2Mo3Na3O12.ICSD.281400 | insulator  | insulator |
| Fe2Mo3O8.ICSD.61069      | insulator  | insulator |
| Fe2Mo4N1.ICSD.162275     | metal      | metal     |
| Fe2N1Nb4.ICSD.632693     | metal      | metal     |
| Fe2N1Ta4.ICSD.632740     | metal      | metal     |
| Fe2N1Zr4.ICSD.632768     | metal      | metal     |
| Fe2N1.ICSD.150889        | metal      | metal     |
| Fe2N1.ICSD.152811        | metal      | metal     |
| Fe2N1.ICSD.33575         | metal      | metal     |
| Fe2N1.ICSD.44612         | metal      | metal     |
| Fe2Na1O3.ICSD.200009     | metal      | metal     |
| Fe2Na1O3.ICSD.424349     | metal      | insulator |
| Fe2Na2O1Se2.ICSD.186502  | insulator  | insulator |
| Fe2Nb1.ICSD.188274       | metal      | metal     |
| Fe2Nb1.ICSD.632773       | metal      | metal     |
| Fe2Nb1.ICSD.632791       | metal      | metal     |
| Fe2Nd1Si2.ICSD.169532    | metal      | metal     |
| Fe2Nd1Si2.ICSD.632872    | metal      | metal     |
| Fe2Nd1Si2.ICSD.632874    | metal      | metal     |
| Fe2Nd1.ICSD.103548       | metal      | metal     |
| Fe2Nd1.ICSD.632845       | metal      | metal     |
| Fe2Ni1O4.ICSD.158834     | metal      | metal     |
| Fe2Ni1O4.ICSD.182237     | metal      | metal     |
| Fe2Ni1O4.ICSD.52387      | metal      | metal     |
| Fe2Ni1P1.ICSD.153485     | metal      | metal     |
| Fe2Ni1.ICSD.188275       | metal      | metal     |
| Fe2O12P4.ICSD.33740      | insulator  | insulator |
| Fe2O12S3.ICSD.21018      | insulator  | insulator |
| Fe2O12Se4Sr1.ICSD.81569  | insulator  | insulator |
| Fe2O14P4Pb1.ICSD.83648   | insulator  | insulator |

Supplementary Table 387. Five-fold cross validated predictions for the metal/insulator classification (379/598).

| system                    | calculated | predicted |
|---------------------------|------------|-----------|
| Fe2O14P4Sr1.ICSD.79719    | insulator  | insulator |
| Fe2O1Ti4.ICSD.100839      | metal      | metal     |
| Fe2O3Pr2S2.ICSD.181168    | metal      | metal     |
| Fe2O3Pr2Se2.ICSD.183145   | metal      | metal     |
| Fe2O3.ICSD.108905         | metal      | metal     |
| Fe2O3.ICSD.15840          | metal      | insulator |
| Fe2O3.ICSD.161287         | insulator  | insulator |
| Fe2O3.ICSD.189439         | insulator  | insulator |
| Fe2O3.ICSD.96076          | insulator  | insulator |
| Fe2O3.ICSD.96077          | metal      | insulator |
| Fe2O4Si1.ICSD.158572      | insulator  | insulator |
| Fe2O4Si1.ICSD.169083      | insulator  | insulator |
| Fe2O4Si1.ICSD.185523      | insulator  | insulator |
| Fe2O4Si1.ICSD.87462       | insulator  | insulator |
| Fe2O4Ti1.ICSD.187588      | metal      | metal     |
| Fe2O4Y1.ICSD.67701        | metal      | metal     |
| Fe2O4Yb1.ICSD.4192        | metal      | metal     |
| Fe2O4Zn1.ICSD.76981       | metal      | metal     |
| Fe2O4Zn1.ICSD.91935       | metal      | metal     |
| Fe2O5P1.ICSD.32641        | insulator  | insulator |
| Fe2O5P1.ICSD.80554        | metal      | insulator |
| Fe2O5Rb4.ICSD.154291      | insulator  | insulator |
| Fe2O5Te1.ICSD.8282        | insulator  | insulator |
| Fe2O5Ti1.ICSD.24416       | insulator  | insulator |
| Fe2O5Ti1.ICSD.36183       | insulator  | insulator |
| Fe2O6P2Sc2Sr4.ICSD.168586 | metal      | metal     |
| Fe2O6Rb6.ICSD.154371      | insulator  | insulator |
| Fe2O6Te1.ICSD.24795       | insulator  | insulator |
| Fe2O6W1.ICSD.1147         | insulator  | insulator |
| Fe2O7P2.ICSD.17062        | insulator  | insulator |
| Fe2O7P2.ICSD.240243       | insulator  | insulator |
| Fe2O7P2.ICSD.36208        | insulator  | insulator |
| Fe2O7Sr1Tb2.ICSD.19038    | insulator  | insulator |
| Fe2O7Sr3.ICSD.2648        | metal      | metal     |
| Fe2P1.ICSD.246858         | metal      | metal     |
| Fe2P1.ICSD.603609         | metal      | metal     |
| Fe2P2S6.ICSD.657319       | insulator  | insulator |
| Fe2P2Sr1.ICSD.10467       | metal      | metal     |
| Fe2P2U1.ICSD.633115       | metal      | metal     |
| Fe2Pr1Si2.ICSD.106663     | metal      | metal     |
| Fe2Pr1Si2.ICSD.53521      | metal      | metal     |
| Fe2Pr1.ICSD.103590        | metal      | metal     |
| Fe2Pr1.ICSD.103591        | metal      | metal     |
| Fe2Pr1.ICSD.633150        | metal      | metal     |
| Fe2Pu1Si2.ICSD.602683     | metal      | metal     |
| Fe2Pu1.ICSD.633202        | metal      | metal     |
| Fe2Rb1S3.ICSD.99506       | insulator  | insulator |
| Fe2Rb1Se3.ICSD.81547      | metal      | metal     |
| Fe2Rb1Te3.ICSD.81548      | metal      | metal     |
| Fe2Rb6S6.ICSD.425088      | insulator  | insulator |

Supplementary Table 388. Five-fold cross validated predictions for the metal/insulator classification (380/598).

| system                 | calculated | predicted |
|------------------------|------------|-----------|
| Fe2Re3.ICSD_108565     | metal      | metal     |
| Fe2S2Tl1.ICSD_633338   | metal      | metal     |
| Fe2S3Tl1.ICSD_166049   | metal      | metal     |
| Fe2S4Si1.ICSD_88517    | insulator  | insulator |
| Fe2S6Ta9.ICSD_63592    | metal      | metal     |
| Fe2Sb1Ti1.ICSD_186060  | metal      | metal     |
| Fe2Sc1Si2.ICSD_87157   | metal      | metal     |
| Fe2Sc1.ICSD_633414     | metal      | metal     |
| Fe2Sc1.ICSD_633417     | metal      | metal     |
| Fe2Sc1.ICSD_633420     | metal      | metal     |
| Fe2Sc1.ICSD_633423     | metal      | metal     |
| Fe2Sc1.ICSD_633427     | metal      | metal     |
| Fe2Sc1.ICSD_633428     | metal      | metal     |
| Fe2Sc3Si3.ICSD_76347   | metal      | metal     |
| Fe2Se2Tl1.ICSD_633510  | metal      | metal     |
| Fe2Se4V1.ICSD_633517   | metal      | metal     |
| Fe2Se8Ta11.ICSD_40377  | metal      | metal     |
| Fe2Si1V1.ICSD_53555    | metal      | metal     |
| Fe2Si1.ICSD_100094     | metal      | metal     |
| Fe2Si2Tb1.ICSD_55801   | metal      | metal     |
| Fe2Si2Tb1.ICSD_633572  | metal      | metal     |
| Fe2Si2Th1.ICSD_68209   | metal      | metal     |
| Fe2Si2U1.ICSD_53552    | metal      | metal     |
| Fe2Si2U1.ICSD_633606   | metal      | metal     |
| Fe2Si2U1.ICSD_633617   | metal      | metal     |
| Fe2Si2Y1.ICSD_53556    | metal      | metal     |
| Fe2Si2Yb1.ICSD_633658  | metal      | metal     |
| Fe2Si2Zr1.ICSD_633666  | metal      | metal     |
| Fe2Si3Zr3.ICSD_633671  | metal      | metal     |
| Fe2Sm1.ICSD_633697     | metal      | metal     |
| Fe2Sn1Ti1.ICSD_103642  | metal      | insulator |
| Fe2Sn1Ti1.ICSD_186058  | insulator  | metal     |
| Fe2Sn1U2.ICSD_106681   | metal      | metal     |
| Fe2Sn1V1.ICSD_103644   | metal      | metal     |
| Fe2Sn1.ICSD_103637     | metal      | metal     |
| Fe2Ta1.ICSD_633780     | metal      | metal     |
| Fe2Ta1.ICSD_633784     | metal      | metal     |
| Fe2Ta1.ICSD_633796     | metal      | metal     |
| Fe2Tb1Zn20.ICSD_152109 | metal      | metal     |
| Fe2Tb1.ICSD_2351       | metal      | metal     |
| Fe2Tb1.ICSD_633817     | metal      | metal     |
| Fe2Tb1.ICSD_633821     | metal      | metal     |
| Fe2Ti1.ICSD_103663     | metal      | metal     |
| Fe2Ti1.ICSD_657043     | metal      | metal     |
| Fe2U1.ICSD_103680      | metal      | metal     |
| Fe2U1.ICSD_633998      | metal      | metal     |
| Fe2U1.ICSD_634006      | metal      | metal     |
| Fe2U1.ICSD_634010      | metal      | metal     |
| Fe2W1.ICSD_634067      | metal      | metal     |
| Fe2Y1.ICSD_103698      | metal      | metal     |

Supplementary Table 389. Five-fold cross validated predictions for the metal/insulator classification (381/598).

| system                     | calculated | predicted |
|----------------------------|------------|-----------|
| Fe2Yb1.ICSD_103703         | metal      | metal     |
| Fe2Yb1.ICSD_634128         | metal      | metal     |
| Fe2Zr1.ICSD_634155         | metal      | metal     |
| Fe2Zr1.ICSD_634160         | metal      | metal     |
| Fe32Ho12O2.ICSD_9827       | metal      | metal     |
| Fe32O2Y12.ICSD_9640        | metal      | metal     |
| Fe3Ga1.ICSD_108436         | metal      | metal     |
| Fe3Ga1.ICSD_631740         | metal      | metal     |
| Fe3Ga1.ICSD_631761         | metal      | metal     |
| Fe3Ge1.ICSD_53462          | metal      | metal     |
| Fe3Ge1.ICSD_631986         | metal      | metal     |
| Fe3Ge1.ICSD_632004         | metal      | metal     |
| Fe3Ge1.ICSD_632027         | metal      | metal     |
| Fe3H28O30S4.ICSD_15207     | insulator  | insulator |
| Fe3H6K1O14S2.ICSD_189302   | insulator  | insulator |
| Fe3H6Na1O14S2.ICSD_160409  | insulator  | insulator |
| Fe3H6O14P1Pb1S1.ICSD_68352 | insulator  | insulator |
| Fe3Ho2Si5.ICSD_632350      | metal      | metal     |
| Fe3Mn2O12Si3.ICSD_27378    | metal      | insulator |
| Fe3Mo3N1.ICSD_632633       | metal      | metal     |
| Fe3N1Nb3.ICSD_632692       | metal      | metal     |
| Fe3N1Ni1.ICSD_44865        | metal      | metal     |
| Fe3N1Ni1.ICSD_632709       | metal      | metal     |
| Fe3N1Pd1.ICSD_53506        | metal      | metal     |
| Fe3N1Pt1.ICSD_632719       | metal      | metal     |
| Fe3N1Rh1.ICSD_153274       | metal      | metal     |
| Fe3N1W3.ICSD_59255         | metal      | metal     |
| Fe3N1.ICSD_260758          | metal      | metal     |
| Fe3N1.ICSD_33576           | metal      | metal     |
| Fe3N1.ICSD_79982           | metal      | metal     |
| Fe3N1.ICSD_79983           | metal      | metal     |
| Fe3N1.ICSD_79984           | metal      | metal     |
| Fe3N8Sr8.ICSD_409949       | metal      | insulator |
| Fe3Nb1.ICSD_188244         | metal      | metal     |
| Fe3Ni1.ICSD_188233         | metal      | metal     |
| Fe3Ni1.ICSD_188245         | metal      | metal     |
| Fe3Ni1.ICSD_188257         | metal      | metal     |
| Fe3O12Si3V2.ICSD_27376     | insulator  | insulator |
| Fe3O1Ti3.ICSD_29053        | metal      | metal     |
| Fe3O4.ICSD_159976          | metal      | metal     |
| Fe3O4.ICSD_263010          | insulator  | insulator |
| Fe3O4.ICSD_31156           | metal      | metal     |
| Fe3O4.ICSD_35002           | insulator  | metal     |
| Fe3O4.ICSD_65338           | insulator  | metal     |
| Fe3O4.ICSD_84611           | metal      | insulator |
| Fe3O4.ICSD_87697           | metal      | metal     |
| Fe3O4.ICSD_92356           | metal      | metal     |
| Fe3O4.ICSD_98086           | metal      | insulator |
| Fe3O6Rb5.ICSD_174319       | insulator  | insulator |
| Fe3O7P1.ICSD_36207         | insulator  | insulator |

Supplementary Table 390. Five-fold cross validated predictions for the metal/insulator classification (382/598).

| system                 | calculated | predicted |
|------------------------|------------|-----------|
| Fe3O7Yb2.ICSD.8293     | metal      | metal     |
| Fe3O8P2.ICSD.56293     | insulator  | insulator |
| Fe3P1.ICSD.633057      | metal      | metal     |
| Fe3Pd1.ICSD.103586     | metal      | metal     |
| Fe3Pt1.ICSD.633190     | metal      | metal     |
| Fe3Pt1.ICSD.99787      | metal      | metal     |
| Fe3S1.ICSD.633291      | metal      | metal     |
| Fe3S4Tl2.ICSD.41430    | metal      | metal     |
| Fe3S4.ICSD.42537       | metal      | metal     |
| Fe3S4.ICSD.44885       | metal      | metal     |
| Fe3S4.ICSD.633292      | metal      | metal     |
| Fe3Sc2Si5.ICSD.633453  | metal      | metal     |
| Fe3Se4.ICSD.150568     | metal      | metal     |
| Fe3Si1Zr2.ICSD.53558   | metal      | metal     |
| Fe3Si1.ICSD.633531     | metal      | metal     |
| Fe3Si5Tb2.ICSD.633581  | metal      | metal     |
| Fe3Si5U2.ICSD.633609   | metal      | metal     |
| Fe3Si5Y2.ICSD.633652   | metal      | metal     |
| Fe3Si5Yb2.ICSD.633661  | metal      | metal     |
| Fe3Sn1.ICSD.103638     | metal      | metal     |
| Fe3Sn1.ICSD.24569      | metal      | metal     |
| Fe3Sn1.ICSD.633757     | metal      | metal     |
| Fe3Sn2.ICSD.71         | metal      | metal     |
| Fe3Tb1.ICSD.103650     | metal      | metal     |
| Fe3Tb1.ICSD.164279     | metal      | metal     |
| Fe3Tb1.ICSD.633844     | metal      | metal     |
| Fe3Te3Tl1.ICSD.633881  | metal      | metal     |
| Fe3Th1.ICSD.633920     | metal      | metal     |
| Fe3Th7.ICSD.633908     | metal      | metal     |
| Fe3Y1.ICSD.634092      | metal      | metal     |
| Fe4Ge2Yb1.ICSD.39898   | metal      | metal     |
| Fe4La1P12.ICSD.168583  | metal      | metal     |
| Fe4La1Sb12.ICSD.53490  | metal      | metal     |
| Fe4Mn8Y1.ICSD.632605   | metal      | metal     |
| Fe4N1.ICSD.60195       | metal      | metal     |
| Fe4Na1Sb12.ICSD.246577 | metal      | metal     |
| Fe4Nd1P12.ICSD.632859  | metal      | metal     |
| Fe4Nd1Sb12.ICSD.79927  | metal      | metal     |
| Fe4O11Sr4.ICSD.249009  | metal      | insulator |
| Fe4O5.ICSD.185515      | insulator  | insulator |
| Fe4P12Pr1.ICSD.93363   | metal      | metal     |
| Fe4P12Sm1.ICSD.633097  | metal      | metal     |
| Fe4P12Tb1.ICSD.245293  | metal      | metal     |
| Fe4P12Th1.ICSD.200827  | insulator  | metal     |
| Fe4P12U1.ICSD.89093    | metal      | metal     |
| Fe4P12Yb1.ICSD.156464  | metal      | metal     |
| Fe4P1.ICSD.43551       | metal      | metal     |
| Fe4P2Sc1.ICSD.68525    | metal      | metal     |
| Fe4P2Zr1.ICSD.633122   | metal      | metal     |
| Fe4Rb8S10.ICSD.425071  | insulator  | insulator |

Supplementary Table 391. Five-fold cross validated predictions for the metal/insulator classification (383/598).

| system                 | calculated | predicted |
|------------------------|------------|-----------|
| Fe4Sb12Sr1.ICSD.658733 | metal      | metal     |
| Fe4Sc1Si2.ICSD.633444  | metal      | metal     |
| Fe4Si2Tm1.ICSD.261030  | metal      | metal     |
| Fe4Si2Y1.ICSD.186048   | metal      | metal     |
| Fe4Si2Zr1.ICSD.87172   | metal      | metal     |
| Fe4Si7Zr4.ICSD.633672  | metal      | metal     |
| Fe4Sn4Zr3.ICSD.168652  | metal      | metal     |
| Fe5Gd1.ICSD.103480     | metal      | metal     |
| Fe5H1O8.ICSD.166135    | insulator  | insulator |
| Fe5H2La1.ICSD.160916   | metal      | metal     |
| Fe5H7La1.ICSD.160915   | metal      | metal     |
| Fe5H7La1.ICSD.160917   | metal      | metal     |
| Fe5Ho1.ICSD.103502     | metal      | metal     |
| Fe5Ho1.ICSD.632281     | metal      | metal     |
| Fe5Li1O8.ICSD.35769    | metal      | insulator |
| Fe5Nd1.ICSD.103549     | metal      | metal     |
| Fe5Nd3O12.ICSD.260556  | insulator  | insulator |
| Fe5O12Pr3.ICSD.422690  | insulator  | insulator |
| Fe5O12Si3.ICSD.27377   | insulator  | insulator |
| Fe5O12Tb3.ICSD.22320   | insulator  | insulator |
| Fe5O12Y3.ICSD.88504    | insulator  | insulator |
| Fe5O12Yb3.ICSD.23854   | metal      | metal     |
| Fe5Si3U1.ICSD.157999   | metal      | metal     |
| Fe5Si3.ICSD.161130     | metal      | metal     |
| Fe5Si3.ICSD.161132     | metal      | metal     |
| Fe5Si3.ICSD.99967      | metal      | metal     |
| Fe5Sm1.ICSD.103629     | metal      | metal     |
| Fe5Th1.ICSD.103656     | metal      | metal     |
| Fe5Th1.ICSD.150500     | metal      | metal     |
| Fe5Th1.ICSD.633902     | metal      | metal     |
| Fe5Y1.ICSD.184905      | metal      | metal     |
| Fe6Ga6Ho1.ICSD.180129  | metal      | metal     |
| Fe6Ga6Sc1.ICSD.103465  | metal      | metal     |
| Fe6Ge4Li1.ICSD.41381   | metal      | metal     |
| Fe6Ge5.ICSD.2145       | metal      | metal     |
| Fe6Ge6Hf1.ICSD.85903   | metal      | metal     |
| Fe6Ge6Ho1.ICSD.656772  | metal      | metal     |
| Fe6Ge6Lu1.ICSD.84189   | metal      | metal     |
| Fe6Ge6Mg1.ICSD.188716  | metal      | metal     |
| Fe6Ge6Nb1.ICSD.92177   | metal      | metal     |
| Fe6Ge6Sc1.ICSD.632112  | metal      | metal     |
| Fe6Ge6Sc1.ICSD.92170   | metal      | metal     |
| Fe6Ge6Tb1.ICSD.86194   | metal      | metal     |
| Fe6Ge6Zr1.ICSD.92175   | metal      | metal     |
| Fe6Sc1Sn6.ICSD.633457  | metal      | metal     |
| Fe6Sn6Tb1.ICSD.106583  | metal      | metal     |
| Fe6Ta7.ICSD.633795     | metal      | metal     |
| Fe7Mo6.ICSD.632622     | metal      | metal     |
| Fe7Nb6.ICSD.188281     | metal      | metal     |
| Fe7O10Si1.ICSD.26171   | metal      | insulator |

Supplementary Table 392. Five-fold cross validated predictions for the metal/insulator classification (384/598).

| system                         | calculated | predicted |
|--------------------------------|------------|-----------|
| Fe7S8.ICSD_8064                | metal      | insulator |
| Fe7Se8.ICSD_16882              | metal      | metal     |
| Fe7Ta6.ICSD_633791             | metal      | metal     |
| Fe7Th2.ICSD_103657             | metal      | metal     |
| Fe7W6.ICSD_103694              | metal      | metal     |
| Fe8Rb24S24.ICSD_425089         | insulator  | insulator |
| Fe8Tb1V4.ICSD_633855           | metal      | metal     |
| Fe9La1Si4.ICSD_79590           | metal      | metal     |
| Ga0.4N0.2V0.6.ICSD_634722      | metal      | metal     |
| Ga0.5N0.5O0.5Zn0.5.ICSD_160638 | insulator  | insulator |
| Ga10Ni1Pr3.ICSD_20663          | metal      | metal     |
| Ga12Gd4Pd1.ICSD_634239         | metal      | metal     |
| Ga12Ho4Ni1.ICSD_634391         | metal      | metal     |
| Ga12Ho4Pd1.ICSD_634396         | metal      | metal     |
| Ga12La2Pd1.ICSD_171486         | metal      | metal     |
| Ga12Lu4Pd1.ICSD_634587         | metal      | metal     |
| Ga12Ni1Tm4.ICSD_634969         | metal      | metal     |
| Ga12Pd1Tb4.ICSD_635088         | metal      | metal     |
| Ga12Pd1Tm4.ICSD_635093         | metal      | metal     |
| Ga12Pd1U4.ICSD_156309          | metal      | metal     |
| Ga12Pd1Y4.ICSD_635099          | metal      | metal     |
| Ga12Pt1Tb4.ICSD_153211         | metal      | metal     |
| Ga12Pt1Y4.ICSD_153909          | metal      | metal     |
| Ga12Rh1U4.ICSD_156308          | metal      | metal     |
| Ga16Hf6Rh7.ICSD_634325         | metal      | metal     |
| Ga16Hf6Ru7.ICSD_634327         | metal      | metal     |
| Ga16Ir7Sc6.ICSD_634454         | metal      | metal     |
| Ga16Ir7Ti6.ICSD_634458         | metal      | metal     |
| Ga16Os7Sc6.ICSD_635026         | metal      | metal     |
| Ga16Pt7Ti6.ICSD_635156         | metal      | metal     |
| Ga16Rh7Sc6.ICSD_635212         | metal      | metal     |
| Ga16Rh7Ti6.ICSD_635215         | metal      | metal     |
| Ga16Rh7Zr6.ICSD_635224         | metal      | metal     |
| Ga16Ru7Zr6.ICSD_635240         | metal      | metal     |
| Ga1Gd1Mg1.ICSD_54616           | metal      | metal     |
| Ga1Gd1Zn1.ICSD_634245          | metal      | metal     |
| Ga1Gd1.ICSD_109240             | metal      | metal     |
| Ga1Gd3O6.ICSD_420733           | insulator  | insulator |
| Ga1Ge1H1Sr1.ICSD_173570        | insulator  | insulator |
| Ga1Ge1Li1.ICSD_25310           | metal      | metal     |
| Ga1Ge1Li3O5.ICSD_72101         | insulator  | insulator |
| Ga1Ge1Mn1.ICSD_634253          | metal      | metal     |
| Ga1Ge1Mn1.ICSD_634255          | metal      | metal     |
| Ga1Ge1N1Sr2.ICSD_420413        | insulator  | metal     |
| Ga1Ge1Sr1.ICSD_634281          | metal      | metal     |
| Ga1Ge1Te1.ICSD_35386           | metal      | insulator |
| Ga1Ge1Yb1.ICSD_152569          | metal      | metal     |
| Ga1Ge2Na5.ICSD_169702          | metal      | metal     |
| Ga1H1O2.ICSD_409671            | insulator  | insulator |
| Ga1H1O4Se1.ICSD_422882         | insulator  | insulator |

Supplementary Table 393. Five-fold cross validated predictions for the metal/insulator classification (385/598).

| system                  | calculated | predicted |
|-------------------------|------------|-----------|
| Ga1H1Si1Sr1.ICSD_173569 | insulator  | insulator |
| Ga1H1Sn1Sr1.ICSD_173571 | insulator  | insulator |
| Ga1H2Na3O9P2.ICSD_84644 | insulator  | insulator |
| Ga1H4K1.ICSD_169709     | insulator  | insulator |
| Ga1H4Li1.ICSD_169706    | insulator  | insulator |
| Ga1H4Li1.ICSD_169707    | insulator  | insulator |
| Ga1H4Mg1.ICSD_240696    | metal      | insulator |
| Ga1H4Na1.ICSD_67309     | insulator  | insulator |
| Ga1H4Rb1.ICSD_169710    | insulator  | insulator |
| Ga1H4Sr1.ICSD_240697    | metal      | insulator |
| Ga1H5Sr1.ICSD_240697    | insulator  | insulator |
| Ga1Hf1Ni1.ICSD_634315   | metal      | metal     |
| Ga1Hf1Ni2.ICSD_103734   | metal      | metal     |
| Ga1Hf1Pd1.ICSD_156269   | metal      | metal     |
| Ga1Hf1Pt1.ICSD_156268   | metal      | metal     |
| Ga1Hf1Rh1.ICSD_634326   | metal      | metal     |
| Ga1Hf1.ICSD_103726      | metal      | metal     |
| Ga1Hf2Sb3.ICSD_189076   | metal      | metal     |
| Ga1Hf2.ICSD_102809      | metal      | metal     |
| Ga1Ho1Mn1.ICSD_106705   | metal      | metal     |
| Ga1Ho1Ni1.ICSD_103751   | metal      | metal     |
| Ga1Ho1O3.ICSD_420711    | insulator  | insulator |
| Ga1Ho1Pd1.ICSD_54590    | metal      | metal     |
| Ga1Ho1Pt1.ICSD_634398   | metal      | metal     |
| Ga1Ho1.ICSD_634376      | metal      | metal     |
| Ga1Ho3O6.ICSD_99496     | insulator  | insulator |
| Ga1I3La3.ICSD_409561    | metal      | metal     |
| Ga1I3Li1.ICSD_202642    | insulator  | insulator |
| Ga1I3O9.ICSD_171008     | insulator  | insulator |
| Ga1I3.ICSD_413457       | insulator  | insulator |
| Ga1I4K1.ICSD_400816     | insulator  | insulator |
| Ga1I4Ti1.ICSD_419824    | insulator  | insulator |
| Ga1I7Te1.ICSD_407982    | insulator  | insulator |
| Ga1In1O3.ICSD_30339     | insulator  | insulator |
| Ga1In1O5Zn2.ICSD_380305 | insulator  | insulator |
| Ga1In1O7Zn4.ICSD_247275 | insulator  | insulator |
| Ga1In1S3.ICSD_62929     | insulator  | insulator |
| Ga1In1Se2.ICSD_601131   | metal      | insulator |
| Ga1In1Se3.ICSD_62930    | insulator  | insulator |
| Ga1In1Te2.ICSD_60083    | metal      | insulator |
| Ga1Ir1Li2.ICSD_106708   | metal      | metal     |
| Ga1Ir1Li2.ICSD_107085   | metal      | metal     |
| Ga1Ir1Th1.ICSD_634457   | metal      | metal     |
| Ga1Ir1U1.ICSD_634461    | metal      | metal     |
| Ga1Ir1Y1.ICSD_634463    | metal      | metal     |
| Ga1Ir1.ICSD_103760      | metal      | metal     |
| Ga1K1O14Te6.ICSD_280793 | insulator  | insulator |
| Ga1K1S2.ICSD_107928     | insulator  | insulator |
| Ga1K1Sb4.ICSD_300158    | insulator  | insulator |
| Ga1K2Li3O4.ICSD_35290   | insulator  | insulator |

Supplementary Table 394. Five-fold cross validated predictions for the metal/insulator classification (386/598).

| system                  | calculated | predicted |
|-------------------------|------------|-----------|
| Ga1K2Na1P2.ICSD.300112  | insulator  | insulator |
| Ga1K6Na3Sb4.ICSD.77274  | insulator  | insulator |
| Ga1La1Mg1.ICSD.413276   | metal      | metal     |
| Ga1La1Ni1.ICSD.62281    | metal      | metal     |
| Ga1La1O1Se2.ICSD.48024  | metal      | insulator |
| Ga1La1O3.ICSD.161782    | insulator  | insulator |
| Ga1La1O3.ICSD.51039     | insulator  | insulator |
| Ga1La1O3.ICSD.76047     | metal      | metal     |
| Ga1La1O3.ICSD.83349     | insulator  | insulator |
| Ga1La1Pd2.ICSD.656959   | metal      | metal     |
| Ga1La1Pt1.ICSD.634512   | metal      | metal     |
| Ga1La1Zn1.ICSD.634520   | metal      | metal     |
| Ga1La1.ICSD.634484      | metal      | metal     |
| Ga1La2N3.ICSD.160089    | insulator  | insulator |
| Ga1La3Mn1S7.ICSD.634493 | insulator  | insulator |
| Ga1La3.ICSD.603198      | metal      | metal     |
| Ga1Li1Mg2.ICSD.103782   | metal      | metal     |
| Ga1Li1Mo2O8.ICSD.241135 | insulator  | insulator |
| Ga1Li1O2.ICSD.18152     | insulator  | insulator |
| Ga1Li1O2.ICSD.28388     | insulator  | insulator |
| Ga1Li1O6Si2.ICSD.80108  | insulator  | insulator |
| Ga1Li1O6Si2.ICSD.80924  | insulator  | insulator |
| Ga1Li1O8W2.ICSD.28008   | insulator  | insulator |
| Ga1Li1S2.ICSD.96914     | insulator  | insulator |
| Ga1Li1Se2.ICSD.634546   | insulator  | insulator |
| Ga1Li1Si1.ICSD.103786   | insulator  | metal     |
| Ga1Li1Te2.ICSD.162555   | insulator  | insulator |
| Ga1Li1.ICSD.634528      | metal      | metal     |
| Ga1Li2Pd1.ICSD.634537   | metal      | metal     |
| Ga1Li2Pt1.ICSD.106713   | metal      | metal     |
| Ga1Li2Rh1.ICSD.106714   | metal      | metal     |
| Ga1Li2.ICSD.659761      | metal      | metal     |
| Ga1Li3N2.ICSD.419137    | insulator  | insulator |
| Ga1Li3Na2O4.ICSD.37071  | insulator  | insulator |
| Ga1Li3O5Si1.ICSD.72100  | insulator  | insulator |
| Ga1Li5O4.ICSD.9082      | insulator  | insulator |
| Ga1Lu1Ni1.ICSD.634564   | metal      | metal     |
| Ga1Lu1Pd1.ICSD.634586   | metal      | metal     |
| Ga1Lu1.ICSD.634550      | metal      | metal     |
| Ga1Mg1Mo4O7.ICSD.93228  | metal      | metal     |
| Ga1Mg1Pr1.ICSD.413285   | metal      | metal     |
| Ga1Mg1Sm1.ICSD.413286   | metal      | metal     |
| Ga1Mg1Tm1.ICSD.413278   | metal      | metal     |
| Ga1Mg1Y1.ICSD.160909    | metal      | metal     |
| Ga1Mg1.ICSD.103789      | metal      | metal     |
| Ga1Mg2.ICSD.103790      | metal      | metal     |
| Ga1Mn1Ni2.ICSD.167566   | metal      | metal     |
| Ga1Mn1Ni2.ICSD.187493   | metal      | metal     |
| Ga1Mn1Ni2.ICSD.634654   | metal      | metal     |
| Ga1Mn1Pt1.ICSD.103807   | metal      | metal     |

Supplementary Table 395. Five-fold cross validated predictions for the metal/insulator classification (387/598).

| system                  | calculated | predicted |
|-------------------------|------------|-----------|
| Ga1Mn1Pt1.ICSD.108482   | metal      | metal     |
| Ga1Mn1Ti2.ICSD.189697   | insulator  | metal     |
| Ga1Mn1.ICSD.634628      | metal      | metal     |
| Ga1Mn2V1.ICSD.103813    | metal      | metal     |
| Ga1Mn3N1.ICSD.87399     | metal      | metal     |
| Ga1Mn3.ICSD.603351      | metal      | metal     |
| Ga1Mn3.ICSD.634607      | metal      | metal     |
| Ga1Mo3.ICSD.634697      | metal      | metal     |
| Ga1Mo4S8Si1.ICSD.53580  | metal      | metal     |
| Ga1Mo4S8.ICSD.106732    | insulator  | metal     |
| Ga1Mo4S8.ICSD.634707    | metal      | metal     |
| Ga1Mo4Se4Te4.ICSD.49568 | metal      | insulator |
| Ga1Mo4Se8.ICSD.36563    | insulator  | metal     |
| Ga1Mo4Se8.ICSD.634710   | insulator  | metal     |
| Ga1N1Nd3.ICSD.103821    | metal      | metal     |
| Ga1N1V3.ICSD.634723     | metal      | metal     |
| Ga1N1.ICSD.159250       | insulator  | insulator |
| Ga1N1.ICSD.181358       | insulator  | insulator |
| Ga1N1.ICSD.185155       | insulator  | insulator |
| Ga1N1.ICSD.41500        | insulator  | insulator |
| Ga1N3Sr3.ICSD.281259    | insulator  | insulator |
| Ga1N5O14.ICSD.280268    | insulator  | insulator |
| Ga1N5Sr6.ICSD.281260    | insulator  | insulator |
| Ga1Na1O2.ICSD.36652     | insulator  | insulator |
| Ga1Na1O6Si2.ICSD.156699 | insulator  | insulator |
| Ga1Na1Te2.ICSD.44702    | insulator  | insulator |
| Ga1Na3P4Sr3.ICSD.402285 | insulator  | insulator |
| Ga1Nb1Ni2.ICSD.103839   | metal      | metal     |
| Ga1Nb1O4.ICSD.18187     | insulator  | insulator |
| Ga1Nb3.ICSD.108484      | metal      | metal     |
| Ga1Nb3.ICSD.634746      | metal      | metal     |
| Ga1Nb3.ICSD.634748      | metal      | metal     |
| Ga1Nb4S8.ICSD.158312    | metal      | metal     |
| Ga1Nb4Se8.ICSD.84196    | metal      | metal     |
| Ga1Nb5Sn2.ICSD.103842   | metal      | metal     |
| Ga1Nd1O3.ICSD.24856     | insulator  | insulator |
| Ga1Nd1O3.ICSD.76050     | metal      | metal     |
| Ga1Nd1.ICSD.634805      | metal      | metal     |
| Ga1Nd3O6.ICSD.99490     | insulator  | insulator |
| Ga1Nd3.ICSD.634799      | metal      | metal     |
| Ga1Ni1Pu1.ICSD.634900   | metal      | metal     |
| Ga1Ni1Tb1.ICSD.634939   | metal      | metal     |
| Ga1Ni1Th1.ICSD.634951   | metal      | metal     |
| Ga1Ni1Ti1.ICSD.103885   | metal      | metal     |
| Ga1Ni1Ti2.ICSD.185666   | metal      | metal     |
| Ga1Ni1U1.ICSD.600394    | metal      | metal     |
| Ga1Ni1Y1.ICSD.634986    | metal      | metal     |
| Ga1Ni1Zr1.ICSD.635009   | metal      | metal     |
| Ga1Ni1.ICSD.103853      | metal      | metal     |
| Ga1Ni2Sc1.ICSD.103874   | metal      | metal     |

Supplementary Table 396. Five-fold cross validated predictions for the metal/insulator classification (388/598).

| system                  | calculated | predicted |
|-------------------------|------------|-----------|
| Ga1Ni2Ta1_ICSD_103881   | metal      | metal     |
| Ga1Ni2Ti1_ICSD_103886   | metal      | metal     |
| Ga1Ni2U1_ICSD_603100    | metal      | metal     |
| Ga1Ni2V1_ICSD_103892    | metal      | metal     |
| Ga1Ni2Y2_ICSD_634983    | metal      | metal     |
| Ga1Ni2Zr1_ICSD_103902   | metal      | metal     |
| Ga1Ni2_ICSD_634869      | metal      | metal     |
| Ga1Ni3_ICSD_103856      | metal      | metal     |
| Ga1O2Ti1_ICSD_33579     | insulator  | insulator |
| Ga1O3Pr1_ICSD_76049     | insulator  | metal     |
| Ga1O3Y1_ICSD_1999       | insulator  | insulator |
| Ga1O4P1_ICSD_155446     | insulator  | insulator |
| Ga1O4P1_ICSD_30883      | insulator  | insulator |
| Ga1O4Rb5_ICSD_420328    | insulator  | insulator |
| Ga1O6Sb1Sr2_ICSD_157014 | insulator  | insulator |
| Ga1O6Sb1Sr2_ICSD_157017 | insulator  | insulator |
| Ga1O6Tb3_ICSD_99494     | insulator  | insulator |
| Ga1O6Y3_ICSD_155086     | insulator  | insulator |
| Ga1P1Pd5_ICSD_635043    | metal      | metal     |
| Ga1P1Pt5_ICSD_635044    | metal      | metal     |
| Ga1P1S4_ICSD_2613       | insulator  | insulator |
| Ga1P1_ICSD_40868        | metal      | insulator |
| Ga1P1_ICSD_635031       | metal      | insulator |
| Ga1P1_ICSD_67772        | insulator  | insulator |
| Ga1P1_ICSD_77087        | insulator  | metal     |
| Ga1Pd1Sc1_ICSD_635080   | metal      | metal     |
| Ga1Pd1Tb1_ICSD_54586    | metal      | metal     |
| Ga1Pd1Y1_ICSD_635097    | metal      | metal     |
| Ga1Pd1Yb1_ICSD_635102   | metal      | metal     |
| Ga1Pd1_ICSD_635060      | metal      | metal     |
| Ga1Pd2Sc1_ICSD_103909   | metal      | metal     |
| Ga1Pd2Y1_ICSD_635098    | metal      | metal     |
| Ga1Pd2_ICSD_409939      | metal      | metal     |
| Ga1Pr1Zn1_ICSD_635129   | metal      | metal     |
| Ga1Pr1_ICSD_103912      | metal      | metal     |
| Ga1Pr1_ICSD_635104      | metal      | metal     |
| Ga1Pr1_ICSD_635123      | metal      | metal     |
| Ga1Pr3_ICSD_103914      | metal      | metal     |
| Ga1Pt1Sc1_ICSD_635150   | metal      | metal     |
| Ga1Pt1Tb1_ICSD_106747   | metal      | metal     |
| Ga1Pt1Th1_ICSD_635155   | metal      | metal     |
| Ga1Pt1Ti1_ICSD_156263   | metal      | metal     |
| Ga1Pt1Y1_ICSD_635163    | metal      | metal     |
| Ga1Pt1Yb1_ICSD_635165   | metal      | metal     |
| Ga1Pt1Zr1_ICSD_152132   | metal      | metal     |
| Ga1Pt1Zr1_ICSD_635168   | metal      | metal     |
| Ga1Pt1_ICSD_635132      | metal      | metal     |
| Ga1Pt2_ICSD_103919      | metal      | metal     |
| Ga1Pt3_ICSD_103922      | metal      | metal     |
| Ga1Pt3_ICSD_635134      | metal      | metal     |

Supplementary Table 397. Five-fold cross validated predictions for the metal/insulator classification (389/598).

| system                   | calculated | predicted |
|--------------------------|------------|-----------|
| Ga1Pt3_ICSD_635145       | metal      | metal     |
| Ga1Pu1Rh1_ICSD_635198    | metal      | metal     |
| Ga1Pu1_ICSD_103930       | metal      | metal     |
| Ga1Pu3_ICSD_635171       | metal      | metal     |
| Ga1Rh1Th1_ICSD_635214    | metal      | metal     |
| Ga1Rh1Ti1_ICSD_108492    | metal      | metal     |
| Ga1Rh1U1_ICSD_635219     | metal      | metal     |
| Ga1Rh1Y1_ICSD_635221     | metal      | metal     |
| Ga1Rh1Zr1_ICSD_635225    | metal      | metal     |
| Ga1Rh1_ICSD_657338       | metal      | metal     |
| Ga1Ru1U1_ICSD_600396     | metal      | metal     |
| Ga1Ru1U1_ICSD_635235     | metal      | metal     |
| Ga1Ru1_ICSD_103950       | metal      | metal     |
| Ga1S1_ICSD_40824         | insulator  | insulator |
| Ga1S1_ICSD_635244        | insulator  | insulator |
| Ga1S2Ti1_ICSD_180614     | insulator  | insulator |
| Ga1S8Ti4_ICSD_260772     | metal      | insulator |
| Ga1S8V4_ICSD_603133      | metal      | metal     |
| Ga1Sb1_ICSD_44979        | metal      | metal     |
| Ga1Sc1_ICSD_103954       | metal      | metal     |
| Ga1Se1_ICSD_2002         | insulator  | insulator |
| Ga1Se1_ICSD_20237        | metal      | insulator |
| Ga1Se1_ICSD_635382       | insulator  | insulator |
| Ga1Se1_ICSD_660262       | insulator  | insulator |
| Ga1Se1_ICSD_73388        | insulator  | insulator |
| Ga1Se2Ti1_ICSD_100131    | insulator  | insulator |
| Ga1Se2Ti1_ICSD_1573      | insulator  | insulator |
| Ga1Se2Ti1_ICSD_157752    | insulator  | insulator |
| Ga1Se4Ta4Te4_ICSD_182921 | metal      | metal     |
| Ga1Se8Ta4_ICSD_170660    | metal      | metal     |
| Ga1Se8V4_ICSD_603125     | metal      | metal     |
| Ga1Sn1Sr1_ICSD_166387    | metal      | metal     |
| Ga1Sn2V2_ICSD_106752     | metal      | metal     |
| Ga1Sn3Zr5_ICSD_106753    | metal      | metal     |
| Ga1Tb1_ICSD_103979       | metal      | metal     |
| Ga1Te1_ICSD_43328        | insulator  | insulator |
| Ga1Te1_ICSD_8249         | metal      | insulator |
| Ga1Te2Ti1_ICSD_635523    | insulator  | insulator |
| Ga1Th2_ICSD_102812       | metal      | metal     |
| Ga1Ti1_ICSD_103989       | metal      | metal     |
| Ga1Ti2_ICSD_182430       | metal      | metal     |
| Ga1Ti2_ICSD_189699       | metal      | metal     |
| Ga1Ti3_ICSD_103991       | metal      | metal     |
| Ga1Ti3_ICSD_635554       | metal      | metal     |
| Ga1Tm1Zn1_ICSD_635590    | metal      | metal     |
| Ga1Tm1_ICSD_635577       | metal      | metal     |
| Ga1V3_ICSD_104021        | metal      | metal     |
| Ga1V3_ICSD_635603        | metal      | metal     |
| Ga1V3_ICSD_635607        | metal      | metal     |
| Ga1V3_ICSD_635624        | metal      | metal     |

Supplementary Table 398. Five-fold cross validated predictions for the metal/insulator classification (390/598).

| system                   | calculated | predicted |
|--------------------------|------------|-----------|
| Ga1V3.ICSD.635625        | metal      | metal     |
| Ga1V3.ICSD.635636        | metal      | metal     |
| Ga1Y1Zn1.ICSD.635662     | metal      | metal     |
| Ga1Y1.ICSD.104030        | metal      | metal     |
| Ga1Yb1.ICSD.635668       | metal      | metal     |
| Ga1Zr2.ICSD.102806       | metal      | metal     |
| Ga1.ICSD.12173           | metal      | metal     |
| Ga1.ICSD.12174           | metal      | metal     |
| Ga1.ICSD.165978          | metal      | metal     |
| Ga1.ICSD.165979          | metal      | metal     |
| Ga1.ICSD.23247           | metal      | metal     |
| Ga1.ICSD.2513            | metal      | metal     |
| Ga1.ICSD.2795            | metal      | metal     |
| Ga1.ICSD.43539           | metal      | metal     |
| Ga1.ICSD.654170          | metal      | metal     |
| Ga2Gd1.ICSD.107426       | metal      | metal     |
| Ga2Gd1.ICSD.601806       | metal      | metal     |
| Ga2Gd1.ICSD.634204       | metal      | metal     |
| Ga2Gd1.ICSD.634210       | metal      | metal     |
| Ga2Gd1.ICSD.634223       | metal      | metal     |
| Ga2Ge1La2S8.ICSD.262241  | insulator  | insulator |
| Ga2Ge1Li2S6.ICSD.161763  | metal      | insulator |
| Ga2Ge4O14Pb3.ICSD.250123 | insulator  | insulator |
| Ga2H3O9P3.ICSD.74528     | insulator  | insulator |
| Ga2H6O12Te3.ICSD.240957  | insulator  | insulator |
| Ga2Hf6Ni1.ICSD.634312    | metal      | metal     |
| Ga2Hg1S4.ICSD.189739     | insulator  | insulator |
| Ga2Hg1Se4.ICSD.188545    | insulator  | insulator |
| Ga2Hg1Te4.ICSD.53575     | insulator  | insulator |
| Ga2Ho1Ni1.ICSD.634393    | metal      | metal     |
| Ga2Ho1Pd1.ICSD.600151    | metal      | metal     |
| Ga2Ho1.ICSD.110149       | metal      | metal     |
| Ga2Ho3Mn3Si1.ICSD.99077  | metal      | metal     |
| Ga2Ho3Ni6.ICSD.634381    | metal      | metal     |
| Ga2Ho3.ICSD.634368       | metal      | metal     |
| Ga2I2Y2.ICSD.417149      | metal      | metal     |
| Ga2I3.ICSD.24822         | insulator  | insulator |
| Ga2I8Pd1.ICSD.413230     | insulator  | insulator |
| Ga2In6O8Pt1.ICSD.411505  | insulator  | insulator |
| Ga2Ir1Li1.ICSD.106709    | metal      | metal     |
| Ga2K2Na4O6.ICSD.62136    | insulator  | insulator |
| Ga2K6O6.ICSD.2269        | insulator  | insulator |
| Ga2K6Se6.ICSD.300170     | insulator  | insulator |
| Ga2K6Te6.ICSD.300171     | insulator  | insulator |
| Ga2La1Ni1.ICSD.634496    | metal      | metal     |
| Ga2La1.ICSD.409562       | metal      | metal     |
| Ga2La2O1S6Zn1.ICSD.61044 | insulator  | insulator |
| Ga2La3Ni2.ICSD.20939     | metal      | metal     |
| Ga2Li1Pd1.ICSD.106712    | metal      | metal     |
| Ga2Li1Pt1.ICSD.107094    | metal      | metal     |

Supplementary Table 399. Five-fold cross validated predictions for the metal/insulator classification (391/598).

| system                   | calculated | predicted |
|--------------------------|------------|-----------|
| Ga2Li1Rh1.ICSD.106715    | metal      | metal     |
| Ga2Li1Ru1.ICSD.106716    | metal      | metal     |
| Ga2Li3.ICSD.659760       | metal      | metal     |
| Ga2Lu3Mn3Si1.ICSD.99080  | metal      | metal     |
| Ga2Mg1O4.ICSD.86507      | insulator  | insulator |
| Ga2Mg1S4.ICSD.15350      | insulator  | insulator |
| Ga2Mg1Sc2.ICSD.260213    | metal      | metal     |
| Ga2Mg1.ICSD.103792       | metal      | metal     |
| Ga2Mg1.ICSD.23226        | metal      | metal     |
| Ga2Mg5.ICSD.103794       | metal      | metal     |
| Ga2Mn1S4.ICSD.634668     | insulator  | insulator |
| Ga2Mn1Se4.ICSD.634676    | insulator  | insulator |
| Ga2Mn1Se4.ICSD.659100    | insulator  | insulator |
| Ga2Mn1Te4.ICSD.67402     | metal      | insulator |
| Ga2Mn2Pr6S14.ICSD.634657 | insulator  | insulator |
| Ga2Mn2S5.ICSD.634669     | insulator  | insulator |
| Ga2Mn3Si1Tb3.ICSD.99075  | metal      | metal     |
| Ga2Mn3Si1Tm3.ICSD.99079  | metal      | metal     |
| Ga2N4Sr3.ICSD.170441     | insulator  | insulator |
| Ga2Nb3.ICSD.103832       | metal      | metal     |
| Ga2Nd1Ni1.ICSD.103850    | metal      | metal     |
| Ga2Nd1.ICSD.103849       | metal      | metal     |
| Ga2Nd1.ICSD.106734       | metal      | metal     |
| Ga2Nd1.ICSD.634804       | metal      | metal     |
| Ga2Nd1.ICSD.658432       | metal      | metal     |
| Ga2Nd3Ni6.ICSD.634818    | metal      | metal     |
| Ga2Ni1S4.ICSD.59230      | metal      | insulator |
| Ga2Ni1S4.ICSD.634901     | insulator  | insulator |
| Ga2Ni1Sc1.ICSD.103875    | metal      | metal     |
| Ga2Ni1Tb1.ICSD.634949    | metal      | metal     |
| Ga2Ni1Y1.ICSD.103895     | metal      | metal     |
| Ga2Ni1Yb1.ICSD.262737    | metal      | metal     |
| Ga2Ni1Zr6.ICSD.635001    | metal      | metal     |
| Ga2Ni3Y1.ICSD.103896     | metal      | metal     |
| Ga2Ni6Tb3.ICSD.634938    | metal      | metal     |
| Ga2Ni6Y3.ICSD.634985     | metal      | metal     |
| Ga2O11Te4.ICSD.94349     | insulator  | insulator |
| Ga2O3.ICSD.162252        | insulator  | insulator |
| Ga2O3.ICSD.184327        | insulator  | insulator |
| Ga2O3.ICSD.635016        | insulator  | insulator |
| Ga2O4Pb1.ICSD.33533      | insulator  | insulator |
| Ga2O4Pb1.ICSD.80129      | insulator  | insulator |
| Ga2O4Sr1.ICSD.15539      | insulator  | insulator |
| Ga2O4Zn1.ICSD.81107      | insulator  | insulator |
| Ga2O6Rb6.ICSD.2270       | insulator  | insulator |
| Ga2O6Te1.ICSD.78346      | insulator  | insulator |
| Ga2O9Te3.ICSD.261175     | insulator  | insulator |
| Ga2Os1.ICSD.103785       | insulator  | metal     |
| Ga2Pb1Se4.ICSD.635052    | insulator  | insulator |
| Ga2Pd1Tb1.ICSD.600149    | metal      | metal     |

Supplementary Table 400. Five-fold cross validated predictions for the metal/insulator classification (392/598).

| system                | calculated | predicted |
|-----------------------|------------|-----------|
| Ga2Pd1Y1_ICSD_600148  | metal      | metal     |
| Ga2Pd1Yb1_ICSD_600145 | metal      | metal     |
| Ga2Pd5_ICSD_103904    | metal      | metal     |
| Ga2Pr1_ICSD_103916    | metal      | metal     |
| Ga2Pr1_ICSD_635108    | metal      | metal     |
| Ga2Pt1_ICSD_103925    | metal      | metal     |
| Ga2Pu1_ICSD_635181    | metal      | metal     |
| Ga2Ru1_ICSD_635228    | insulator  | metal     |
| Ga2S2Te1_ICSD_8028    | insulator  | insulator |
| Ga2S3_ICSD_409550     | insulator  | insulator |
| Ga2S3_ICSD_488        | insulator  | insulator |
| Ga2S4Sr1_ICSD_635274  | insulator  | insulator |
| Ga2S4Zn1_ICSD_635300  | insulator  | insulator |
| Ga2S4Zn1_ICSD_635305  | insulator  | insulator |
| Ga2S5Sn2_ICSD_37173   | insulator  | insulator |
| Ga2Sc1_ICSD_103955    | metal      | metal     |
| Ga2Sc1_ICSD_103956    | metal      | metal     |
| Ga2Se2Te1_ICSD_64617  | insulator  | insulator |
| Ga2Se3_ICSD_35028     | insulator  | insulator |
| Ga2Se4Sr1_ICSD_635401 | insulator  | insulator |
| Ga2Se4Yb1_ICSD_635414 | insulator  | insulator |
| Ga2Se4Zn1_ICSD_168594 | insulator  | insulator |
| Ga2Sr1Te4_ICSD_41166  | insulator  | insulator |
| Ga2Sr1_ICSD_150473    | metal      | metal     |
| Ga2Ta3_ICSD_635490    | metal      | metal     |
| Ga2Tb1_ICSD_106754    | metal      | metal     |
| Ga2Te3_ICSD_657608    | metal      | metal     |
| Ga2Te4Zn1_ICSD_44888  | insulator  | insulator |
| Ga2Te5_ICSD_1085      | insulator  | insulator |
| Ga2Th1_ICSD_103985    | metal      | metal     |
| Ga2Th3_ICSD_103988    | metal      | metal     |
| Ga2Tm1_ICSD_104006    | metal      | metal     |
| Ga2U1_ICSD_104013     | metal      | metal     |
| Ga2Y1_ICSD_104032     | metal      | metal     |
| Ga2Yb1_ICSD_104035    | metal      | metal     |
| Ga2Yb1_ICSD_107582    | metal      | metal     |
| Ga2Zr1_ICSD_104041    | metal      | metal     |
| Ga2Zr3_ICSD_635692    | metal      | metal     |
| Ga3Gd1Ru1_ICSD_634241 | insulator  | metal     |
| Ga3Hf1_ICSD_103728    | metal      | metal     |
| Ga3Hf2_ICSD_103729    | metal      | metal     |
| Ga3Hf3Nb2_ICSD_103733 | metal      | metal     |
| Ga3Hf5_ICSD_634295    | metal      | metal     |
| Ga3Ho1Ru1_ICSD_634401 | metal      | metal     |
| Ga3Ho1_ICSD_110129    | metal      | metal     |
| Ga3Ho1_ICSD_602234    | metal      | metal     |
| Ga3Ho1_ICSD_602235    | metal      | metal     |
| Ga3Ho1_ICSD_634364    | metal      | metal     |
| Ga3Ho5_ICSD_634357    | metal      | metal     |
| Ga3Ho5_ICSD_658182    | metal      | metal     |

Supplementary Table 401. Five-fold cross validated predictions for the metal/insulator classification (393/598).

| system                      | calculated | predicted |
|-----------------------------|------------|-----------|
| Ga3I1Te3_ICSD_61678         | insulator  | insulator |
| Ga3I1Te3_ICSD_66031         | insulator  | insulator |
| Ga3Ir1_ICSD_634441          | metal      | metal     |
| Ga3K1_ICSD_20664            | insulator  | metal     |
| Ga3La1Pd2_ICSD_106710       | metal      | metal     |
| Ga3Lu1_ICSD_106721          | metal      | metal     |
| Ga3N5Sr3_ICSD_170443        | insulator  | insulator |
| Ga3Na3O12Te2_ICSD_418645    | insulator  | insulator |
| Ga3Nb1_ICSD_634760          | metal      | metal     |
| Ga3Nd1_ICSD_103847          | metal      | metal     |
| Ga3Ni1U1_ICSD_106826        | metal      | metal     |
| Ga3Ni2Ti4_ICSD_103888       | metal      | metal     |
| Ga3Ni2_ICSD_634859          | metal      | metal     |
| Ga3Ni3Zn1_ICSD_103898       | metal      | metal     |
| Ga3Ni5_ICSD_103861          | metal      | metal     |
| Ga3O14Si2Sr3Ta1_ICSD_421591 | insulator  | insulator |
| Ga3O7P1_ICSD_59364          | insulator  | insulator |
| Ga3Os1Tb1_ICSD_412144       | metal      | metal     |
| Ga3Os1_ICSD_635024          | insulator  | metal     |
| Ga3Pd5_ICSD_635071          | metal      | metal     |
| Ga3Pd7_ICSD_107292          | metal      | metal     |
| Ga3Pt2_ICSD_103926          | metal      | metal     |
| Ga3Pt5_ICSD_103927          | metal      | metal     |
| Ga3Pu1_ICSD_246481          | metal      | metal     |
| Ga3Rb1S5_ICSD_419822        | insulator  | insulator |
| Ga3Rb1_ICSD_103943          | insulator  | metal     |
| Ga3Re1_ICSD_635203          | metal      | metal     |
| Ga3Rh1_ICSD_635208          | metal      | metal     |
| Ga3Ru1Tb1_ICSD_635232       | metal      | metal     |
| Ga3Ru1Tm1_ICSD_106748       | metal      | metal     |
| Ga3Ru1Y1_ICSD_635239        | metal      | metal     |
| Ga3Ru1_ICSD_412078          | insulator  | metal     |
| Ga3Sc1_ICSD_635343          | metal      | metal     |
| Ga3Sc5_ICSD_635341          | metal      | metal     |
| Ga3Ta1_ICSD_103977          | metal      | metal     |
| Ga3Ta5_ICSD_103978          | metal      | metal     |
| Ga3Tb1_ICSD_103981          | metal      | metal     |
| Ga3Tb1_ICSD_635497          | metal      | metal     |
| Ga3Ti1_ICSD_103993          | metal      | metal     |
| Ga3Ti2_ICSD_103995          | metal      | metal     |
| Ga3Tm1_ICSD_104007          | metal      | metal     |
| Ga3Tm1_ICSD_104008          | metal      | metal     |
| Ga3Tm1_ICSD_635583          | metal      | metal     |
| Ga3U1_ICSD_104015           | metal      | metal     |
| Ga3U1_ICSD_635598           | metal      | metal     |
| Ga3Y5_ICSD_150544           | metal      | metal     |
| Ga3Zr1_ICSD_104043          | metal      | metal     |
| Ga41Mo8_ICSD_634698         | metal      | metal     |
| Ga4Ge1O8_ICSD_202044        | insulator  | insulator |
| Ga4Hc1Ni1_ICSD_423079       | metal      | metal     |

Supplementary Table 402. Five-fold cross validated predictions for the metal/insulator classification (394/598).

| system                   | calculated | predicted |
|--------------------------|------------|-----------|
| Ga4Ho1Ti2.ICSD_634403    | metal      | metal     |
| Ga4Li1Y1.ICSD_98666      | metal      | metal     |
| Ga4Mn1.ICSD_634630       | metal      | metal     |
| Ga4Na1.ICSD_103824       | metal      | metal     |
| Ga4Nb5.ICSD_103837       | metal      | metal     |
| Ga4Ni1Tb1.ICSD_634948    | metal      | metal     |
| Ga4Ni1Tm1.ICSD_423069    | metal      | metal     |
| Ga4Ni1Y1.ICSD_634990     | metal      | metal     |
| Ga4Ni1Yb1.ICSD_154676    | metal      | metal     |
| Ga4Ni3.ICSD_103864       | metal      | metal     |
| Ga4O7Sr1.ICSD_10316      | insulator  | insulator |
| Ga4O8Ti1.ICSD_155638     | insulator  | insulator |
| Ga4O9Sr3.ICSD_51546      | insulator  | insulator |
| Ga4Pd7Zn3.ICSD_103911    | metal      | metal     |
| Ga4Sc1Ti2.ICSD_635352    | metal      | metal     |
| Ga4Sc1V2.ICSD_635354     | metal      | metal     |
| Ga4Sr1.ICSD_635459       | metal      | metal     |
| Ga4Ti2Y1.ICSD_103999     | metal      | metal     |
| Ga4V2Zr1.ICSD_635647     | metal      | metal     |
| Ga4Yb1.ICSD_104036       | metal      | metal     |
| Ga4Yb1.ICSD_635673       | metal      | metal     |
| Ga5Gd3O12.ICSD_184931    | insulator  | insulator |
| Ga5H1O8.ICSD_236277      | insulator  | insulator |
| Ga5Hf1Ni1.ICSD_634319    | metal      | metal     |
| Ga5Ho3O12.ICSD_409390    | insulator  | insulator |
| Ga5Ir1U1.ICSD_103639     | metal      | metal     |
| Ga5La3O14Sn1.ICSD_412328 | insulator  | insulator |
| Ga5Li1O8.ICSD_33716      | insulator  | insulator |
| Ga5Lu3Ni1.ICSD_634575    | metal      | metal     |
| Ga5Mg2.ICSD_23227        | metal      | metal     |
| Ga5Mn2.ICSD_634639       | metal      | metal     |
| Ga5Mn8.ICSD_634632       | metal      | metal     |
| Ga5N1Sr6.ICSD_77645      | metal      | metal     |
| Ga5Na1O12Ti2.ICSD_108816 | insulator  | insulator |
| Ga5Nd3O12.ICSD_84872     | insulator  | insulator |
| Ga5Ni1U1.ICSD_600552     | metal      | metal     |
| Ga5Ni1.ICSD_165723       | metal      | metal     |
| Ga5Ni8Zn36.ICSD_103900   | metal      | metal     |
| Ga5O12Tb3.ICSD_184934    | insulator  | insulator |
| Ga5O12Y3.ICSD_80148      | insulator  | insulator |
| Ga5O12Yb3.ICSD_23851     | insulator  | insulator |
| Ga5Os1U1.ICSD_600559     | metal      | metal     |
| Ga5Pd1U1.ICSD_600553     | metal      | metal     |
| Ga5Pd1.ICSD_103908       | metal      | metal     |
| Ga5Pt1U1.ICSD_600554     | metal      | metal     |
| Ga5Rh1U1.ICSD_600550     | metal      | metal     |
| Ga5Rh3.ICSD_240179       | metal      | metal     |
| Ga5Ru1U1.ICSD_600548     | metal      | metal     |
| Ga5Ta6.ICSD_635465       | metal      | metal     |
| Ga5V2.ICSD_635642        | metal      | metal     |

Supplementary Table 403. Five-fold cross validated predictions for the metal/insulator classification (395/598).

| system                    | calculated | predicted |
|---------------------------|------------|-----------|
| Ga5V6.ICSD_635633         | metal      | metal     |
| Ga5W2.ICSD_635650         | metal      | metal     |
| Ga6Gd2Mn1.ICSD_103721     | metal      | metal     |
| Ga6Ge6Mn1Y4.ICSD_248234   | metal      | metal     |
| Ga6Hf3Mn2.ICSD_103732     | metal      | metal     |
| Ga6I2Li8O24Si6.ICSD_87989 | insulator  | insulator |
| Ga6La1Pd1.ICSD_240162     | metal      | metal     |
| Ga6La1.ICSD_103768        | metal      | metal     |
| Ga6La1.ICSD_634486        | metal      | metal     |
| Ga6Mn1Tb2.ICSD_600191     | metal      | metal     |
| Ga6Pu1.ICSD_103942        | metal      | metal     |
| Ga6Y1.ICSD_104033         | metal      | metal     |
| Ga7Ni3.ICSD_408313        | metal      | metal     |
| Ga7Pd3.ICSD_174527        | metal      | metal     |
| Ga7Pt3.ICSD_180363        | metal      | metal     |
| Ga7Rb1.ICSD_103946        | metal      | metal     |
| Ga7Te10.ICSD_400668       | insulator  | insulator |
| Ga8Ho3Ir3.ICSD_634379     | metal      | metal     |
| Ga8Ru1U2.ICSD_106749      | metal      | metal     |
| Ga9Ho3Pd2.ICSD_634397     | metal      | metal     |
| Ga9Ni13.ICSD_103866       | metal      | metal     |
| Ga9O2S13Ti3.ICSD_61256    | insulator  | insulator |
| Gd1Ge1Ir1.ICSD_88163      | metal      | metal     |
| Gd1Ge1K1S4.ICSD_603183    | insulator  | insulator |
| Gd1Ge1Li1.ICSD_32030      | metal      | metal     |
| Gd1Ge1Na1O4.ICSD_85496    | insulator  | insulator |
| Gd1Ge1Sc1.ICSD_86068      | metal      | metal     |
| Gd1Ge1Ti1.ICSD_85905      | metal      | metal     |
| Gd1Ge1Zn1.ICSD_163344     | metal      | metal     |
| Gd1Ge1.ICSD_635724        | metal      | metal     |
| Gd1Ge2Mn2.ICSD_53609      | metal      | metal     |
| Gd1Ge2Ni2.ICSD_106851     | metal      | metal     |
| Gd1Ge2Pd2.ICSD_52771      | metal      | metal     |
| Gd1Ge2Pd2.ICSD_53610      | metal      | metal     |
| Gd1Ge2Pt2.ICSD_53611      | metal      | metal     |
| Gd1Ge2Rh2.ICSD_53612      | metal      | metal     |
| Gd1Ge2.ICSD_635723        | metal      | metal     |
| Gd1H2.ICSD_635801         | metal      | metal     |
| Gd1H3O3.ICSD_200093       | insulator  | insulator |
| Gd1H3.ICSD_44740          | metal      | metal     |
| Gd1H3.ICSD_77970          | metal      | insulator |
| Gd1Hg1.ICSD_104046        | metal      | metal     |
| Gd1Hg2.ICSD_635811        | metal      | metal     |
| Gd1Hg3.ICSD_635810        | metal      | metal     |
| Gd1I1S1.ICSD_416462       | insulator  | insulator |
| Gd1I1S1.ICSD_59203        | metal      | metal     |
| Gd1In1Ir1.ICSD_414478     | metal      | metal     |
| Gd1In1Mg1.ICSD_54617      | metal      | metal     |
| Gd1In1Pd1.ICSD_415506     | metal      | metal     |
| Gd1In1Pd2.ICSD_104054     | metal      | metal     |

Supplementary Table 404. Five-fold cross validated predictions for the metal/insulator classification (396/598).

| system                    | calculated | predicted |
|---------------------------|------------|-----------|
| Gd1In1Pt1.ICSD_104055     | metal      | metal     |
| Gd1In1Pt4.ICSD_635842     | metal      | metal     |
| Gd1In1Rh1.ICSD_104056     | metal      | metal     |
| Gd1In1Zn1.ICSD_635852     | metal      | metal     |
| Gd1In1.ICSD_104048        | metal      | metal     |
| Gd1In1.ICSD_104049        | metal      | metal     |
| Gd1In3.ICSD_104051        | metal      | metal     |
| Gd1In3.ICSD_635829        | metal      | metal     |
| Gd1Ir1Si3.ICSD_635872     | metal      | metal     |
| Gd1Ir2Si2.ICSD_104062     | metal      | metal     |
| Gd1Ir2Si2.ICSD_635869     | metal      | metal     |
| Gd1Ir2Si2.ICSD_635877     | metal      | metal     |
| Gd1Ir2.ICSD_635863        | metal      | metal     |
| Gd1Ir3.ICSD_104061        | metal      | metal     |
| Gd1K1Na1Nb1O5.ICSD_420037 | insulator  | insulator |
| Gd1K1Na1O5Ta1.ICSD_419854 | insulator  | insulator |
| Gd1K1O12P4.ICSD_171710    | insulator  | insulator |
| Gd1K1O3Pd1.ICSD_417105    | insulator  | insulator |
| Gd1K1O8W2.ICSD_68249      | insulator  | insulator |
| Gd1K1S2.ICSD_44945        | insulator  | insulator |
| Gd1K1Te2.ICSD_98657       | insulator  | insulator |
| Gd1K1Te4.ICSD_391205      | metal      | insulator |
| Gd1K2O8Rb1V2.ICSD_39370   | insulator  | insulator |
| Gd1K3O8P2.ICSD_260894     | insulator  | insulator |
| Gd1Li1O12P4.ICSD_416442   | insulator  | insulator |
| Gd1Li1O2.ICSD_27769       | insulator  | insulator |
| Gd1Li1O2.ICSD_422561      | insulator  | insulator |
| Gd1Li1Se2.ICSD_44961      | insulator  | insulator |
| Gd1Li1Sn1.ICSD_603171     | metal      | metal     |
| Gd1Lu3S6.ICSD_30073       | metal      | insulator |
| Gd1Mg1Pd1.ICSD_412441     | metal      | metal     |
| Gd1Mg1Pt1.ICSD_412443     | metal      | metal     |
| Gd1Mg1.ICSD_161746        | metal      | metal     |
| Gd1Mg1.ICSD_635913        | metal      | metal     |
| Gd1Mg2Ni9.ICSD_55619      | metal      | metal     |
| Gd1Mg2.ICSD_104066        | metal      | metal     |
| Gd1Mg2.ICSD_104067        | metal      | metal     |
| Gd1Mg3.ICSD_104068        | metal      | metal     |
| Gd1Mg3.ICSD_635907        | metal      | metal     |
| Gd1Mn12.ICSD_26823        | metal      | metal     |
| Gd1Mn1Si1.ICSD_85852      | metal      | metal     |
| Gd1Mn2Si2.ICSD_54947      | metal      | metal     |
| Gd1Mn2.ICSD_104073        | metal      | metal     |
| Gd1Mn2.ICSD_635929        | metal      | metal     |
| Gd1Mo6S8.ICSD_635984      | metal      | metal     |
| Gd1N1.ICSD_635993         | metal      | metal     |
| Gd1Na1O2.ICSD_97542       | insulator  | insulator |
| Gd1Na1O4Si1.ICSD_16188    | insulator  | insulator |
| Gd1Na1O4Ti1.ICSD_81537    | insulator  | insulator |
| Gd1Na1O4Ti1.ICSD_82006    | insulator  | insulator |

Supplementary Table 405. Five-fold cross validated predictions for the metal/insulator classification (397/598).

| system                  | calculated | predicted |
|-------------------------|------------|-----------|
| Gd1Na1S2.ICSD_37332     | insulator  | insulator |
| Gd1Na1Se2.ICSD_636002   | insulator  | insulator |
| Gd1Ni1Sb1.ICSD_636074   | insulator  | insulator |
| Gd1Ni1Si2.ICSD_601070   | metal      | metal     |
| Gd1Ni1Si2.ICSD_636080   | metal      | metal     |
| Gd1Ni1.ICSD_104087      | metal      | metal     |
| Gd1Ni1.ICSD_636039      | metal      | metal     |
| Gd1Ni2P2.ICSD_636061    | metal      | metal     |
| Gd1Ni2Si2.ICSD_53619    | metal      | metal     |
| Gd1Ni2.ICSD_104088      | metal      | metal     |
| Gd1Ni4P2.ICSD_601102    | metal      | metal     |
| Gd1Ni5.ICSD_636010      | metal      | metal     |
| Gd1O1P1Zn1.ICSD_418524  | insulator  | insulator |
| Gd1O1.ICSD_24981        | metal      | metal     |
| Gd1O2Rb1.ICSD_27335     | insulator  | insulator |
| Gd1O2.ICSD_6318         | metal      | insulator |
| Gd1O3Sc1.ICSD_65513     | insulator  | insulator |
| Gd1O4P1.ICSD_184554     | insulator  | insulator |
| Gd1O4P1.ICSD_184560     | insulator  | insulator |
| Gd1O4P1.ICSD_79753      | insulator  | insulator |
| Gd1O4Ta1.ICSD_415433    | insulator  | insulator |
| Gd1O4V1.ICSD_81703      | insulator  | insulator |
| Gd1O6Re1Sr2.ICSD_25400  | metal      | metal     |
| Gd1O6Ru1Sr2.ICSD_183381 | insulator  | insulator |
| Gd1O8Rb1W2.ICSD_152962  | insulator  | insulator |
| Gd1O9P3.ICSD_155301     | insulator  | insulator |
| Gd1Os2Si2.ICSD_636121   | metal      | metal     |
| Gd1Os2.ICSD_104105      | metal      | metal     |
| Gd1P1Pd1.ICSD_57315     | metal      | metal     |
| Gd1P1Pt1.ICSD_53623     | metal      | metal     |
| Gd1P1.ICSD_53622        | metal      | metal     |
| Gd1P2Ru2.ICSD_602099    | metal      | metal     |
| Gd1P5.ICSD_114          | metal      | metal     |
| Gd1Pb3.ICSD_104107      | metal      | metal     |
| Gd1Pb3.ICSD_636136      | metal      | metal     |
| Gd1Pd1Sb1.ICSD_415946   | metal      | metal     |
| Gd1Pd1Sb1.ICSD_636173   | metal      | metal     |
| Gd1Pd1Sb2.ICSD_658222   | metal      | metal     |
| Gd1Pd1Sn1.ICSD_104114   | metal      | metal     |
| Gd1Pd1Th1.ICSD_104116   | metal      | metal     |
| Gd1Pd1Zn1.ICSD_183339   | metal      | metal     |
| Gd1Pd1.ICSD_636150      | metal      | metal     |
| Gd1Pd2Si2.ICSD_106828   | metal      | metal     |
| Gd1Pd2Si2.ICSD_57317    | metal      | metal     |
| Gd1Pd2.ICSD_106831      | metal      | metal     |
| Gd1Pd3.ICSD_104109      | metal      | metal     |
| Gd1Pd3.ICSD_636146      | metal      | metal     |
| Gd1Pd3.ICSD_636155      | metal      | metal     |
| Gd1Pt1Sb1.ICSD_53624    | metal      | metal     |
| Gd1Pt1Sb1.ICSD_57318    | metal      | metal     |

Supplementary Table 406. Five-fold cross validated predictions for the metal/insulator classification (398/598).

| system                | calculated | predicted |
|-----------------------|------------|-----------|
| Gd1Pt1Sn1_ICSD_417532 | metal      | metal     |
| Gd1Pt1Sn1_ICSD_636241 | metal      | metal     |
| Gd1Pt1_ICSD_636215    | metal      | metal     |
| Gd1Pt2Si2_ICSD_602025 | metal      | metal     |
| Gd1Pt2Si2_ICSD_636238 | metal      | metal     |
| Gd1Pt2Sn1_ICSD_104124 | metal      | metal     |
| Gd1Pt2_ICSD_104121    | metal      | metal     |
| Gd1Pt2_ICSD_150737    | metal      | metal     |
| Gd1Pt2_ICSD_636205    | metal      | metal     |
| Gd1Pt2_ICSD_636217    | metal      | metal     |
| Gd1Pt3_ICSD_104122    | metal      | metal     |
| Gd1Rb1S2_ICSD_81400   | insulator  | insulator |
| Gd1Rb1Se2_ICSD_281072 | insulator  | insulator |
| Gd1Rh1Sn1_ICSD_413353 | metal      | metal     |
| Gd1Rh1_ICSD_104125    | metal      | metal     |
| Gd1Rh2Si2_ICSD_53626  | metal      | metal     |
| Gd1Rh2Si2_ICSD_602051 | metal      | metal     |
| Gd1Rh2Si2_ICSD_636280 | metal      | metal     |
| Gd1Rh2_ICSD_104127    | metal      | metal     |
| Gd1Rh3Si2_ICSD_53627  | metal      | metal     |
| Gd1Rh5_ICSD_104128    | metal      | metal     |
| Gd1Ru1Si1_ICSD_41255  | metal      | metal     |
| Gd1Ru2_ICSD_106830    | metal      | metal     |
| Gd1Ru2_ICSD_150522    | metal      | metal     |
| Gd1Ru4Sn6_ICSD_410808 | metal      | metal     |
| Gd1S1_ICSD_636313     | metal      | metal     |
| Gd1S2Ti1_ICSD_57323   | insulator  | insulator |
| Gd1S2_ICSD_104131     | metal      | metal     |
| Gd1S2_ICSD_636318     | metal      | metal     |
| Gd1S3Sc1_ICSD_173844  | insulator  | insulator |
| Gd1Sb1Zr1_ICSD_107068 | metal      | metal     |
| Gd1Sb1_ICSD_43635     | metal      | metal     |
| Gd1Sb1_ICSD_636379    | metal      | metal     |
| Gd1Sb1_ICSD_636380    | metal      | metal     |
| Gd1Sb2_ICSD_636367    | metal      | metal     |
| Gd1Sc1Si1_ICSD_182419 | metal      | metal     |
| Gd1Sc1Si1_ICSD_86067  | metal      | metal     |
| Gd1Se1_ICSD_636402    | metal      | metal     |
| Gd1Se2Ti1_ICSD_106989 | insulator  | insulator |
| Gd1Se2Ti1_ICSD_636407 | insulator  | insulator |
| Gd1Se2_ICSD_636398    | metal      | metal     |
| Gd1Si1Ti1_ICSD_88114  | metal      | metal     |
| Gd1Si1_ICSD_636423    | metal      | metal     |
| Gd1Si2_ICSD_150661    | metal      | metal     |
| Gd1Si2_ICSD_53633     | metal      | metal     |
| Gd1Si5_ICSD_174530    | metal      | metal     |
| Gd1Sn1Zn1_ICSD_152621 | metal      | metal     |
| Gd1Sn3_ICSD_104133    | metal      | metal     |
| Gd1Sn3_ICSD_182147    | metal      | metal     |
| Gd1Sn4Ti6_ICSD_166193 | metal      | metal     |

Supplementary Table 407. Five-fold cross validated predictions for the metal/insulator classification (399/598).

| system                  | calculated | predicted |
|-------------------------|------------|-----------|
| Gd1Te1_ICSD_104137      | metal      | metal     |
| Gd1Te2Ti1_ICSD_636475   | metal      | insulator |
| Gd1Te2_ICSD_636465      | metal      | metal     |
| Gd1Th1_ICSD_109243      | metal      | metal     |
| Gd1Ti1Zn1_ICSD_636493   | metal      | metal     |
| Gd1Ti1_ICSD_104140      | metal      | metal     |
| Gd1Ti3_ICSD_104141      | metal      | metal     |
| Gd1Ti3_ICSD_104142      | metal      | metal     |
| Gd1Ti3_ICSD_636486      | metal      | metal     |
| Gd1Zn12_ICSD_636505     | metal      | metal     |
| Gd1Zn12_ICSD_636519     | metal      | metal     |
| Gd1Zn1_ICSD_636518      | metal      | metal     |
| Gd1Zn2_ICSD_636499      | metal      | metal     |
| Gd1Zn5_ICSD_104150      | metal      | metal     |
| Gd1_ICSD_102659         | metal      | metal     |
| Gd1_ICSD_104045         | metal      | metal     |
| Gd1_ICSD_20502          | metal      | metal     |
| Gd1_ICSD_52517          | metal      | metal     |
| Gd1_ICSD_53607          | metal      | metal     |
| Gd2Ge1O5_ICSD_61372     | insulator  | insulator |
| Gd2Ge2In1_ICSD_172490   | metal      | metal     |
| Gd2Ge2Mg1_ICSD_93403    | metal      | metal     |
| Gd2Ge3Zn6_ICSD_98237    | metal      | metal     |
| Gd2Hf2O7_ICSD_236213    | insulator  | insulator |
| Gd2In1Ni2_ICSD_635833   | metal      | metal     |
| Gd2In1Pd2_ICSD_658296   | metal      | metal     |
| Gd2In1_ICSD_104052      | metal      | metal     |
| Gd2Mo2O7_ICSD_159776    | metal      | insulator |
| Gd2O1S2_ICSD_409708     | insulator  | insulator |
| Gd2O1Se2_ICSD_280201    | insulator  | insulator |
| Gd2O2S1_ICSD_636114     | insulator  | insulator |
| Gd2O2Se1_ICSD_25808     | insulator  | insulator |
| Gd2O2Te1_ICSD_89563     | insulator  | insulator |
| Gd2O3_ICSD_160211       | insulator  | insulator |
| Gd2O3_ICSD_162247       | insulator  | insulator |
| Gd2O3_ICSD_184528       | insulator  | insulator |
| Gd2O3_ICSD_40473        | insulator  | insulator |
| Gd2O4Si1Te1_ICSD_409569 | insulator  | insulator |
| Gd2O4Sr1_ICSD_96232     | insulator  | insulator |
| Gd2O5Si1_ICSD_27728     | insulator  | insulator |
| Gd2O6Te1_ICSD_412447    | insulator  | insulator |
| Gd2O6W1_ICSD_62887      | insulator  | insulator |
| Gd2O6W1_ICSD_62888      | insulator  | insulator |
| Gd2O7Ru2_ICSD_79332     | metal      | insulator |
| Gd2O7Sc2Sr1_ICSD_167052 | insulator  | insulator |
| Gd2O7Si2_ICSD_20316     | insulator  | insulator |
| Gd2O7Sn2_ICSD_84753     | insulator  | insulator |
| Gd2O7Ti2_ICSD_164024    | insulator  | insulator |
| Gd2O7Zr2_ICSD_185396    | metal      | insulator |
| Gd2O7Zr2_ICSD_188035    | insulator  | metal     |

Supplementary Table 408. Five-fold cross validated predictions for the metal/insulator classification (400/598).

| system                 | calculated | predicted |
|------------------------|------------|-----------|
| Gd2Pt1.ICSD_636221     | metal      | metal     |
| Gd2Rh1Si3.ICSD_636281  | metal      | metal     |
| Gd2S3.ICSD_33785       | insulator  | insulator |
| Gd2S5Sn1.ICSD_636350   | metal      | metal     |
| Gd2S5Zr1.ICSD_425080   | insulator  | insulator |
| Gd2Se3.ICSD_636396     | insulator  | insulator |
| Gd2Te3.ICSD_63649      | metal      | metal     |
| Gd2Ti1.ICSD_636491     | metal      | metal     |
| Gd3Ge5.ICSD_416583     | metal      | metal     |
| Gd3I3Si1.ICSD_67361    | metal      | metal     |
| Gd3In1N1.ICSD_98503    | metal      | metal     |
| Gd3In1Se6.ICSD_180242  | insulator  | insulator |
| Gd3Ir1.ICSD_635853     | metal      | metal     |
| Gd3N1S3.ICSD_416220    | insulator  | insulator |
| Gd3Nb1O7.ICSD_174285   | insulator  | insulator |
| Gd3Ni1.ICSD_104095     | metal      | metal     |
| Gd3Ni6Si2.ICSD_601071  | metal      | metal     |
| Gd3O12Sb5.ICSD_67024   | insulator  | insulator |
| Gd3O3Sb1.ICSD_380460   | insulator  | insulator |
| Gd3O7Os1.ICSD_170875   | metal      | insulator |
| Gd3O7Re1.ICSD_99252    | insulator  | insulator |
| Gd3O7Ru1.ICSD_92067    | insulator  | insulator |
| Gd3Os1.ICSD_636118     | metal      | metal     |
| Gd3P4Pd7.ICSD_409873   | metal      | metal     |
| Gd3Pd2.ICSD_107680     | metal      | metal     |
| Gd3Pd4.ICSD_636163     | metal      | metal     |
| Gd3Pt1.ICSD_636202     | metal      | metal     |
| Gd3Pt4.ICSD_636211     | metal      | metal     |
| Gd3Rh1.ICSD_636259     | metal      | metal     |
| Gd3Ru1.ICSD_636293     | metal      | metal     |
| Gd3S4.ICSD_636332      | metal      | metal     |
| Gd3Se4.ICSD_636389     | metal      | metal     |
| Gd4I5Si1.ICSD_67360    | metal      | metal     |
| Gd4O4Se4Ti1.ICSD_93873 | insulator  | insulator |
| Gd4Sb3.ICSD_636381     | metal      | metal     |
| Gd5Ge3.ICSD_43262      | metal      | metal     |
| Gd5Si3.ICSD_636431     | metal      | metal     |
| Gd5Si3.ICSD_99641      | metal      | metal     |
| Gd6Ni1Te2.ICSD_260932  | metal      | metal     |
| Gd6Zn23.ICSD_636504    | metal      | metal     |
| Gd7Pd3.ICSD_104112     | metal      | metal     |
| Ge10Ir4Y5.ICSD_636767  | metal      | metal     |
| Ge10Os4Y5.ICSD_637487  | metal      | metal     |
| Ge10Tb11.ICSD_637971   | metal      | metal     |
| Ge12La1Pt4.ICSD_174552 | metal      | metal     |
| Ge12Nd1Pt4.ICSD_174555 | metal      | metal     |
| Ge12Pr1Pt4.ICSD_174554 | metal      | metal     |
| Ge136.ICSD_245948      | insulator  | metal     |
| Ge136.ICSD_245955      | metal      | insulator |
| Ge13Ho3Ir4.ICSD_636631 | metal      | metal     |

Supplementary Table 409. Five-fold cross validated predictions for the metal/insulator classification (401/598).

| system                  | calculated | predicted |
|-------------------------|------------|-----------|
| Ge13Ho3Os4.ICSD_636650  | metal      | metal     |
| Ge13Ho3Rh4.ICSD_636664  | metal      | metal     |
| Ge13Ho3Ru4.ICSD_636675  | metal      | metal     |
| Ge13Ir4Lu3.ICSD_636713  | metal      | metal     |
| Ge13Ir4Nd3.ICSD_636718  | metal      | metal     |
| Ge13Ir4Pr3.ICSD_636725  | metal      | metal     |
| Ge13Ir4Tb3.ICSD_636741  | metal      | metal     |
| Ge13Ir4Y3.ICSD_636763   | metal      | metal     |
| Ge13Ir4Yb3.ICSD_636769  | metal      | metal     |
| Ge13Lu3Rh4.ICSD_636932  | metal      | metal     |
| Ge13Nd3Os4.ICSD_637296  | metal      | metal     |
| Ge13Nd3Rh4.ICSD_637309  | metal      | metal     |
| Ge13Os4Pr3.ICSD_637469  | metal      | metal     |
| Ge13Os4Tb3.ICSD_637474  | metal      | metal     |
| Ge13Os4Y3.ICSD_637488   | metal      | metal     |
| Ge13Os4Yb3.ICSD_637490  | metal      | metal     |
| Ge13Rh4Tb3.ICSD_637696  | metal      | metal     |
| Ge13Rh4Y3.ICSD_637724   | metal      | metal     |
| Ge13Rh4Yb3.ICSD_637733  | metal      | metal     |
| Ge13Ru4Tb3.ICSD_637760  | metal      | metal     |
| Ge13Ru4Y3.ICSD_53900    | metal      | metal     |
| Ge13Ru4Yb3.ICSD_637775  | metal      | metal     |
| Ge1H2O4Sr1.ICSD_30320   | insulator  | insulator |
| Ge1H3K3O2S3.ICSD_418259 | insulator  | insulator |
| Ge1H4.ICSD_183081       | metal      | metal     |
| Ge1H4.ICSD_183082       | metal      | metal     |
| Ge1H4.ICSD_183083       | metal      | metal     |
| Ge1H4.ICSD_183084       | insulator  | insulator |
| Ge1Hf1Ir1.ICSD_636558   | metal      | metal     |
| Ge1Hf1Mn1.ICSD_636559   | metal      | metal     |
| Ge1Hf1Ni1.ICSD_636577   | metal      | metal     |
| Ge1Hf1O4.ICSD_202080    | insulator  | insulator |
| Ge1Hf1Os1.ICSD_636578   | metal      | metal     |
| Ge1Hf1Pd1.ICSD_418027   | metal      | metal     |
| Ge1Hf1Pt1.ICSD_86691    | metal      | metal     |
| Ge1Hf1Rh1.ICSD_636581   | metal      | metal     |
| Ge1Hf1Rh1.ICSD_636582   | metal      | metal     |
| Ge1Hf1Ru1.ICSD_636584   | metal      | metal     |
| Ge1Hf1S1.ICSD_25742     | metal      | metal     |
| Ge1Hf1Se1.ICSD_25741    | metal      | metal     |
| Ge1Hf1Te1.ICSD_25743    | metal      | metal     |
| Ge1Hf1Te4.ICSD_241122   | insulator  | insulator |
| Ge1Hf1V1.ICSD_636594    | metal      | metal     |
| Ge1Hf1V1.ICSD_88211     | metal      | metal     |
| Ge1Hf2.ICSD_42524       | metal      | metal     |
| Ge1Hf2.ICSD_636554      | metal      | metal     |
| Ge1Hf3.ICSD_636550      | metal      | metal     |
| Ge1Hf9Mo4.ICSD_636562   | metal      | metal     |
| Ge1Hf9Re4.ICSD_636579   | metal      | metal     |
| Ge1Hg1Li2.ICSD_53646    | metal      | metal     |

Supplementary Table 410. Five-fold cross validated predictions for the metal/insulator classification (402/598).

| system                   | calculated | predicted |
|--------------------------|------------|-----------|
| Ge1Hg1Te4Ti2.ICSD_172504 | insulator  | insulator |
| Ge1Hg2O4.ICSD_26340      | insulator  | insulator |
| Ge1Hg2Se4.ICSD_636599    | insulator  | insulator |
| Ge1Hg4S6.ICSD_636597     | insulator  | insulator |
| Ge1Ho1Ir1.ICSD_636629    | metal      | metal     |
| Ge1Ho1Li1.ICSD_76288     | metal      | metal     |
| Ge1Ho1Mn1.ICSD_97797     | metal      | metal     |
| Ge1Ho1Mn1.ICSD_97798     | metal      | metal     |
| Ge1Ho1Na1O4.ICSD_95964   | insulator  | insulator |
| Ge1Ho1Ni1.ICSD_57062     | metal      | metal     |
| Ge1Ho1Pd1.ICSD_391462    | metal      | metal     |
| Ge1Ho1Pd2.ICSD_636654    | metal      | metal     |
| Ge1Ho1Pt1.ICSD_636660    | metal      | metal     |
| Ge1Ho1Rh1.ICSD_85995     | metal      | metal     |
| Ge1Ho1Ru1.ICSD_88189     | metal      | metal     |
| Ge1Ho1Sn1.ICSD_261754    | metal      | metal     |
| Ge1Ho1Ti1.ICSD_95023     | metal      | metal     |
| Ge1Ho1.ICSD_636627       | metal      | metal     |
| Ge1I1O6Rb1.ICSD_73613    | insulator  | insulator |
| Ge1I2La2.ICSD_414170     | insulator  | metal     |
| Ge1I2La2.ICSD_414171     | insulator  | metal     |
| Ge1I2Y2.ICSD_249477      | insulator  | metal     |
| Ge1I2.ICSD_23176         | insulator  | insulator |
| Ge1I2.ICSD_27674         | insulator  | insulator |
| Ge1I3La3.ICSD_414174     | metal      | metal     |
| Ge1I3Rb1.ICSD_40216      | insulator  | insulator |
| Ge1I3Rb1.ICSD_85041      | insulator  | insulator |
| Ge1I3Ti1.ICSD_201144     | insulator  | insulator |
| Ge1I4.ICSD_67895         | insulator  | insulator |
| Ge1I6K2O18.ICSD_2826     | insulator  | insulator |
| Ge1In1Li1O4.ICSD_62229   | insulator  | insulator |
| Ge1In1Li1.ICSD_53650     | metal      | metal     |
| Ge1In2Li2S6.ICSD_262643  | insulator  | insulator |
| Ge1In2Li2Se6.ICSD_262645 | insulator  | insulator |
| Ge1In4La3.ICSD_81469     | metal      | metal     |
| Ge1In4S4.ICSD_400222     | insulator  | insulator |
| Ge1In7Ir1O8.ICSD_417829  | insulator  | insulator |
| Ge1Ir1La1.ICSD_636698    | metal      | metal     |
| Ge1Ir1Mn3.ICSD_150394    | metal      | metal     |
| Ge1Ir1Nb1.ICSD_411883    | metal      | metal     |
| Ge1Ir1Nd1.ICSD_636717    | metal      | metal     |
| Ge1Ir1Sc1.ICSD_636730    | metal      | metal     |
| Ge1Ir1Tb1.ICSD_88160     | metal      | metal     |
| Ge1Ir1Ti1.ICSD_636746    | metal      | metal     |
| Ge1Ir1Y1.ICSD_636761     | metal      | metal     |
| Ge1Ir1Yb1.ICSD_414433    | metal      | metal     |
| Ge1Ir1Zr1.ICSD_636771    | metal      | metal     |
| Ge1Ir1.ICSD_52126        | metal      | metal     |
| Ge1K1La1S4.ICSD_73970    | insulator  | insulator |
| Ge1K1La1Se4.ICSD_73971   | insulator  | insulator |

Supplementary Table 411. Five-fold cross validated predictions for the metal/insulator classification (403/598).

| system                  | calculated | predicted |
|-------------------------|------------|-----------|
| Ge1K1N1O1.ICSD_60002    | insulator  | insulator |
| Ge1K1Nd1S4.ICSD_603182  | insulator  | insulator |
| Ge1K1O5P1.ICSD_39735    | insulator  | insulator |
| Ge1K1O5Ta1.ICSD_39585   | insulator  | insulator |
| Ge1K1Pr1Se4.ICSD_409812 | insulator  | insulator |
| Ge1K1S4Tb1.ICSD_409811  | insulator  | insulator |
| Ge1K1S4Y1.ICSD_603205   | insulator  | insulator |
| Ge1K1.ICSD_43515        | insulator  | insulator |
| Ge1K2Se4.ICSD_78828     | insulator  | insulator |
| Ge1K2Te4.ICSD_38341     | insulator  | insulator |
| Ge1K4O4.ICSD_37271      | insulator  | insulator |
| Ge1K4S4.ICSD_418257     | insulator  | insulator |
| Ge1K4Se4.ICSD_418258    | insulator  | insulator |
| Ge1La1Li2.ICSD_636809   | metal      | metal     |
| Ge1La1Mn1.ICSD_80007    | metal      | metal     |
| Ge1La1Mn1.ICSD_85857    | metal      | metal     |
| Ge1La1Pd2.ICSD_189328   | metal      | metal     |
| Ge1La1Pt1.ICSD_636837   | metal      | metal     |
| Ge1La1Ru1.ICSD_85862    | metal      | metal     |
| Ge1La1Ti1.ICSD_107617   | metal      | metal     |
| Ge1La1.ICSD_108512      | metal      | metal     |
| Ge1La1.ICSD_413736      | metal      | metal     |
| Ge1La2Mg1O6.ICSD_97016  | insulator  | insulator |
| Ge1La2O5.ICSD_59727     | insulator  | insulator |
| Ge1La3.ICSD_603211      | metal      | metal     |
| Ge1Li1Mg2.ICSD_53671    | metal      | metal     |
| Ge1Li1Nd1O4.ICSD_200774 | insulator  | insulator |
| Ge1Li1Nd1.ICSD_76289    | metal      | metal     |
| Ge1Li1Ni2.ICSD_53673    | metal      | metal     |
| Ge1Li1O4Sc1.ICSD_62481  | insulator  | insulator |
| Ge1Li1O5Ta1.ICSD_39211  | insulator  | insulator |
| Ge1Li1Pd2.ICSD_42130    | metal      | metal     |
| Ge1Li1Pr1.ICSD_59177    | metal      | metal     |
| Ge1Li1Rh2.ICSD_417739   | metal      | metal     |
| Ge1Li1Tb1.ICSD_601256   | metal      | metal     |
| Ge1Li1Te2.ICSD_35676    | insulator  | insulator |
| Ge1Li1Y1.ICSD_32029     | metal      | metal     |
| Ge1Li1Yb1.ICSD_59178    | metal      | metal     |
| Ge1Li1Zn1.ICSD_171496   | metal      | metal     |
| Ge1Li1.ICSD_42062       | metal      | metal     |
| Ge1Li2Nd1.ICSD_636889   | metal      | metal     |
| Ge1Li2O3.ICSD_100403    | insulator  | insulator |
| Ge1Li2O4Rb2.ICSD_61087  | insulator  | insulator |
| Ge1Li2O5Ti1.ICSD_250297 | insulator  | insulator |
| Ge1Li2O5V1.ICSD_86777   | insulator  | insulator |
| Ge1Li2Pb1S4.ICSD_281011 | insulator  | insulator |
| Ge1Li2Pd1.ICSD_53674    | metal      | metal     |
| Ge1Li2Pr1.ICSD_636899   | metal      | metal     |
| Ge1Li2Sn1.ICSD_636906   | metal      | metal     |
| Ge1Li2Zn1.ICSD_171498   | insulator  | metal     |

Supplementary Table 412. Five-fold cross validated predictions for the metal/insulator classification (404/598).

| system                   | calculated | predicted |
|--------------------------|------------|-----------|
| Ge1Li2Zn1.ICSD_53677     | metal      | insulator |
| Ge1Li2Zn1.ICSD_53678     | metal      | metal     |
| Ge1Li4S4.ICSD_95649      | insulator  | insulator |
| Ge1Li8O6.ICSD_65175      | insulator  | insulator |
| Ge1Lu1Na1O4.ICSD_54196   | insulator  | insulator |
| Ge1Lu1Ni1.ICSD_88247     | metal      | metal     |
| Ge1Lu1Rh1.ICSD_90195     | metal      | metal     |
| Ge1Lu1Ru1.ICSD_90194     | metal      | metal     |
| Ge1Lu1Ti1.ICSD_88209     | metal      | metal     |
| Ge1Mg1Mn1.ICSD_66948     | metal      | metal     |
| Ge1Mg1N2.ICSD_23502      | insulator  | insulator |
| Ge1Mg1N4Sr3.ICSD_57382   | insulator  | insulator |
| Ge1Mg1O3.ICSD_160840     | insulator  | insulator |
| Ge1Mg1O3.ICSD_171787     | insulator  | insulator |
| Ge1Mg1O3.ICSD_35533      | insulator  | insulator |
| Ge1Mg1O3.ICSD_35534      | insulator  | insulator |
| Ge1Mg1P2.ICSD_182369     | insulator  | insulator |
| Ge1Mg1Sr1.ICSD_42458     | metal      | metal     |
| Ge1Mg1Yb1.ICSD_57079     | metal      | metal     |
| Ge1Mg2O4.ICSD_1086       | insulator  | insulator |
| Ge1Mg2O4.ICSD_63533      | insulator  | insulator |
| Ge1Mg2O4.ICSD_86505      | insulator  | insulator |
| Ge1Mg2S4.ICSD_23525      | insulator  | insulator |
| Ge1Mg2.ICSD_181764       | metal      | metal     |
| Ge1Mg2.ICSD_52283        | insulator  | metal     |
| Ge1Mg2.ICSD_636942       | metal      | metal     |
| Ge1Mn1N2.ICSD_23528      | insulator  | insulator |
| Ge1Mn1Nb1.ICSD_42911     | metal      | metal     |
| Ge1Mn1Nb1.ICSD_637001    | metal      | metal     |
| Ge1Mn1Nd1.ICSD_80014     | metal      | metal     |
| Ge1Mn1Ni1.ICSD_161715    | metal      | metal     |
| Ge1Mn1Ni1.ICSD_637010    | metal      | metal     |
| Ge1Mn1Ni1.ICSD_637011    | metal      | metal     |
| Ge1Mn1Ni1.ICSD_637029    | metal      | metal     |
| Ge1Mn1Ni2.ICSD_53687     | metal      | metal     |
| Ge1Mn1O3.ICSD_69591      | insulator  | insulator |
| Ge1Mn1O4Zn1.ICSD_166628  | insulator  | insulator |
| Ge1Mn1O5Pr1.ICSD_80421   | insulator  | insulator |
| Ge1Mn1Pd1.ICSD_41156     | metal      | metal     |
| Ge1Mn1Pd2.ICSD_53705     | metal      | metal     |
| Ge1Mn1Pr1.ICSD_80011     | metal      | metal     |
| Ge1Mn1Pr1.ICSD_85859     | metal      | metal     |
| Ge1Mn1Rh1.ICSD_41155     | metal      | metal     |
| Ge1Mn1Rh1.ICSD_637069    | metal      | metal     |
| Ge1Mn1Rh2.ICSD_637070    | metal      | metal     |
| Ge1Mn1Sc1.ICSD_600156    | metal      | metal     |
| Ge1Mn1Ta1.ICSD_637098    | metal      | metal     |
| Ge1Mn1Tb1.ICSD_82568     | metal      | metal     |
| Ge1Mn1Tb1.ICSD_84094     | metal      | metal     |
| Ge1Mn1Te4Ti2.ICSD_172506 | insulator  | insulator |

Supplementary Table 413. Five-fold cross validated predictions for the metal/insulator classification (405/598).

| system                  | calculated | predicted |
|-------------------------|------------|-----------|
| Ge1Mn1Ti2.ICSD_189706   | metal      | metal     |
| Ge1Mn1Tm1.ICSD_97792    | metal      | metal     |
| Ge1Mn1Y1.ICSD_97806     | metal      | metal     |
| Ge1Mn1Yb1.ICSD_95003    | metal      | metal     |
| Ge1Mn1Yb1.ICSD_95004    | metal      | metal     |
| Ge1Mn1Zr1.ICSD_637130   | metal      | metal     |
| Ge1Mn1.ICSD_187195      | metal      | metal     |
| Ge1Mn2O4.ICSD_22046     | insulator  | insulator |
| Ge1Mn2O4.ICSD_23587     | insulator  | insulator |
| Ge1Mn2O4.ICSD_6312      | insulator  | insulator |
| Ge1Mn2S4.ICSD_24142     | metal      | insulator |
| Ge1Mn2S4.ICSD_656252    | insulator  | insulator |
| Ge1Mn2Se4.ICSD_391296   | insulator  | insulator |
| Ge1Mn2Te4.ICSD_165681   | metal      | metal     |
| Ge1Mn2.ICSD_184947      | insulator  | metal     |
| Ge1Mn2.ICSD_52020       | metal      | metal     |
| Ge1Mn3.ICSD_603343      | metal      | metal     |
| Ge1Mn3.ICSD_97743       | metal      | metal     |
| Ge1Mo3.ICSD_637137      | metal      | metal     |
| Ge1N1V3.ICSD_637164     | metal      | metal     |
| Ge1N2O1Si1.ICSD_169122  | insulator  | insulator |
| Ge1N2O1Si1.ICSD_169123  | insulator  | insulator |
| Ge1N2Sr2.ICSD_153302    | metal      | insulator |
| Ge1N2Sr2.ICSD_82534     | metal      | insulator |
| Ge1N2Zn1.ICSD_656277    | insulator  | insulator |
| Ge1Na1Nb1O5.ICSD_39209  | insulator  | insulator |
| Ge1Na1O4Tb1.ICSD_54197  | insulator  | insulator |
| Ge1Na1O4Tm1.ICSD_54198  | insulator  | insulator |
| Ge1Na1O4Y1.ICSD_28213   | insulator  | insulator |
| Ge1Na1O4Y1.ICSD_85497   | insulator  | insulator |
| Ge1Na1O4Yb1.ICSD_54195  | insulator  | insulator |
| Ge1Na1O5Sb1.ICSD_39646  | insulator  | insulator |
| Ge1Na1O5Ta1.ICSD_39210  | insulator  | insulator |
| Ge1Na1.ICSD_43275       | insulator  | metal     |
| Ge1Na2O3.ICSD_1622      | insulator  | insulator |
| Ge1Na2O5Ti1.ICSD_160149 | insulator  | insulator |
| Ge1Na2O5Ti1.ICSD_20129  | insulator  | insulator |
| Ge1Na2O6Te1.ICSD_88789  | insulator  | insulator |
| Ge1Na2S3.ICSD_23455     | insulator  | insulator |
| Ge1Na2Se3.ICSD_49003    | insulator  | insulator |
| Ge1Na2Zn1.ICSD_240728   | metal      | metal     |
| Ge1Na4O4.ICSD_61496     | insulator  | insulator |
| Ge1Nb1Ni1.ICSD_637228   | metal      | metal     |
| Ge1Nb1Pt1.ICSD_186940   | metal      | metal     |
| Ge1Nb1Rh1.ICSD_637230   | metal      | metal     |
| Ge1Nb1Sb1.ICSD_637231   | metal      | metal     |
| Ge1Nb3Te6.ICSD_72208    | metal      | metal     |
| Ge1Nb3.ICSD_108521      | metal      | metal     |
| Ge1Nb3.ICSD_637198      | metal      | metal     |
| Ge1Nd1Rh1.ICSD_82548    | metal      | metal     |

Supplementary Table 414. Five-fold cross validated predictions for the metal/insulator classification (406/598).

| system                  | calculated | predicted |
|-------------------------|------------|-----------|
| Ge1Nd1Ru1_ICSD_602385   | metal      | metal     |
| Ge1Nd1Sc1_ICSD_152903   | metal      | metal     |
| Ge1Nd1Ti1_ICSD_93640    | metal      | metal     |
| Ge1Nd1_ICSD_637286      | metal      | metal     |
| Ge1Ni1Pt2_ICSD_87348    | metal      | metal     |
| Ge1Ni1Sc1_ICSD_86365    | metal      | metal     |
| Ge1Ni1Ta1_ICSD_53861    | metal      | metal     |
| Ge1Ni1Tb1_ICSD_57101    | metal      | metal     |
| Ge1Ni1Ti1_ICSD_53862    | metal      | metal     |
| Ge1Ni1U1_ICSD_603104    | metal      | metal     |
| Ge1Ni1V1_ICSD_637435    | metal      | metal     |
| Ge1Ni1Y1_ICSD_637440    | metal      | metal     |
| Ge1Ni1Yb1_ICSD_637443   | metal      | metal     |
| Ge1Ni1Zr1_ICSD_637451   | metal      | metal     |
| Ge1Ni1_ICSD_52124       | metal      | metal     |
| Ge1Ni2O4_ICSD_69508     | insulator  | insulator |
| Ge1Ni2Sr1_ICSD_419659   | metal      | metal     |
| Ge1Ni2Zn1_ICSD_53865    | metal      | metal     |
| Ge1Ni2Zn3_ICSD_52179    | metal      | metal     |
| Ge1Ni2_ICSD_53743       | metal      | metal     |
| Ge1Ni2_ICSD_637339      | metal      | metal     |
| Ge1Ni3_ICSD_600112      | metal      | metal     |
| Ge1O2_ICSD_158598       | insulator  | insulator |
| Ge1O2_ICSD_158600       | insulator  | insulator |
| Ge1O2_ICSD_23783        | insulator  | insulator |
| Ge1O2_ICSD_281600       | insulator  | insulator |
| Ge1O2_ICSD_53869        | insulator  | insulator |
| Ge1O2_ICSD_59626        | insulator  | insulator |
| Ge1O2_ICSD_66592        | insulator  | insulator |
| Ge1O2_ICSD_94241        | insulator  | insulator |
| Ge1O3Pb1_ICSD_172521    | insulator  | insulator |
| Ge1O3Pb1_ICSD_185694    | metal      | insulator |
| Ge1O3Sr1_ICSD_28603     | insulator  | insulator |
| Ge1O3Zn1_ICSD_183725    | insulator  | insulator |
| Ge1O3Zn1_ICSD_33722     | insulator  | insulator |
| Ge1O4Sr2_ICSD_56382     | insulator  | insulator |
| Ge1O4Th1_ICSD_156945    | insulator  | insulator |
| Ge1O4Th1_ICSD_202081    | insulator  | insulator |
| Ge1O4U1_ICSD_16639      | insulator  | insulator |
| Ge1O4Zr1_ICSD_29262     | insulator  | insulator |
| Ge1O5Pb3_ICSD_100275    | insulator  | insulator |
| Ge1O5Pb3_ICSD_200517    | insulator  | insulator |
| Ge1O5Sr1Ti1_ICSD_158144 | insulator  | insulator |
| Ge1O6Se2_ICSD_422884    | insulator  | insulator |
| Ge1O6Sr1Te1_ICSD_88790  | insulator  | insulator |
| Ge1O6Te2_ICSD_260278    | insulator  | insulator |
| Ge1O7P2_ICSD_74876      | insulator  | insulator |
| Ge1O8P2Sr1_ICSD_423041  | insulator  | insulator |
| Ge1O8P2Sr1_ICSD_423042  | insulator  | insulator |
| Ge1O8Zr3_ICSD_29263     | insulator  | insulator |

Supplementary Table 415. Five-fold cross validated predictions for the metal/insulator classification (407/598).

| system                  | calculated | predicted |
|-------------------------|------------|-----------|
| Ge1Os1Sc1_ICSD_637470   | metal      | metal     |
| Ge1Os1Zr1_ICSD_637491   | metal      | metal     |
| Ge1P1_ICSD_17032        | metal      | metal     |
| Ge1P1_ICSD_53874        | metal      | metal     |
| Ge1P1_ICSD_637492       | insulator  | insulator |
| Ge1P2Zn1_ICSD_637513    | insulator  | insulator |
| Ge1P3_ICSD_16294        | metal      | insulator |
| Ge1P4Sr4_ICSD_32558     | insulator  | insulator |
| Ge1Pb1S3_ICSD_2090      | insulator  | insulator |
| Ge1Pb2S4_ICSD_16272     | insulator  | insulator |
| Ge1Pd1S3_ICSD_408505    | insulator  | insulator |
| Ge1Pd1Sc1_ICSD_637547   | metal      | metal     |
| Ge1Pd1Ti1_ICSD_409925   | metal      | metal     |
| Ge1Pd1Zr1_ICSD_637568   | metal      | metal     |
| Ge1Pd1_ICSD_659798      | metal      | metal     |
| Ge1Pd2Tb1_ICSD_637553   | metal      | metal     |
| Ge1Pd2Y1_ICSD_637566    | metal      | metal     |
| Ge1Pd2_ICSD_76140       | metal      | metal     |
| Ge1Pd5_ICSD_637537      | metal      | metal     |
| Ge1Pr1Ru1_ICSD_602393   | metal      | metal     |
| Ge1Pr1Sc1_ICSD_159197   | metal      | metal     |
| Ge1Pr1Ti1_ICSD_93637    | metal      | metal     |
| Ge1Pr1_ICSD_42376       | metal      | metal     |
| Ge1Pr1_ICSD_42377       | metal      | metal     |
| Ge1Pr1_ICSD_42379       | metal      | metal     |
| Ge1Pr2Rh3_ICSD_637614   | metal      | metal     |
| Ge1Pt1S1_ICSD_637646    | insulator  | insulator |
| Ge1Pt1Sc1_ICSD_637648   | metal      | metal     |
| Ge1Pt1Se1_ICSD_637651   | insulator  | insulator |
| Ge1Pt1Sr1_ICSD_57115    | metal      | metal     |
| Ge1Pt1Tb1_ICSD_90293    | metal      | metal     |
| Ge1Pt1Ti1_ICSD_188965   | insulator  | metal     |
| Ge1Pt1U1_ICSD_246606    | metal      | metal     |
| Ge1Pt1U1_ICSD_92071     | metal      | metal     |
| Ge1Pt1Y1_ICSD_637661    | metal      | metal     |
| Ge1Pt1Yb1_ICSD_419135   | metal      | metal     |
| Ge1Pt1Zr1_ICSD_637663   | metal      | metal     |
| Ge1Pt1_ICSD_637633      | metal      | metal     |
| Ge1Pt2_ICSD_76141       | metal      | metal     |
| Ge1Pt3_ICSD_57114       | metal      | metal     |
| Ge1Pt3_ICSD_77962       | metal      | metal     |
| Ge1Pu3_ICSD_157517      | metal      | metal     |
| Ge1Rb1S5Ta1_ICSD_417874 | insulator  | insulator |
| Ge1Rb1_ICSD_43516       | insulator  | insulator |
| Ge1Rh1Sc1_ICSD_637681   | metal      | metal     |
| Ge1Rh1Sc1_ICSD_637682   | metal      | metal     |
| Ge1Rh1Ta1_ICSD_421092   | metal      | metal     |
| Ge1Rh1Tb1_ICSD_85993    | metal      | metal     |
| Ge1Rh1Te1_ICSD_260373   | insulator  | metal     |
| Ge1Rh1Tm1_ICSD_85997    | metal      | metal     |

Supplementary Table 416. Five-fold cross validated predictions for the metal/insulator classification (408/598).

| system                | calculated | predicted |
|-----------------------|------------|-----------|
| Ge1Rh1U1.ICSD_637720  | metal      | metal     |
| Ge1Rh1Y1.ICSD_637723  | metal      | metal     |
| Ge1Rh1Yb1.ICSD_76355  | metal      | metal     |
| Ge1Rh1Zr1.ICSD_637737 | metal      | metal     |
| Ge1Rh1.ICSD_53890     | metal      | metal     |
| Ge1Rh1.ICSD_637675    | metal      | metal     |
| Ge1Rh2.ICSD_637674    | metal      | metal     |
| Ge1Rh3Y2.ICSD_76345   | metal      | metal     |
| Ge1Ru1Sc1.ICSD_79595  | metal      | metal     |
| Ge1Ru1Tb1.ICSD_85912  | metal      | metal     |
| Ge1Ru1Tm1.ICSD_85941  | metal      | metal     |
| Ge1Ru1.ICSD_637744    | insulator  | metal     |
| Ge1Ru3U2.ICSD_658172  | metal      | metal     |
| Ge1S1Th1.ICSD_15269   | metal      | metal     |
| Ge1S1U1.ICSD_87315    | metal      | metal     |
| Ge1S1Zr1.ICSD_15573   | metal      | metal     |
| Ge1S1.ICSD_1256       | metal      | metal     |
| Ge1S1.ICSD_155418     | insulator  | insulator |
| Ge1S1.ICSD_38165      | metal      | insulator |
| Ge1S1.ICSD_637785     | insulator  | insulator |
| Ge1S2.ICSD_167194     | insulator  | insulator |
| Ge1S2.ICSD_31685      | metal      | insulator |
| Ge1S2.ICSD_44         | insulator  | insulator |
| Ge1S2.ICSD_85527      | insulator  | insulator |
| Ge1S3Sn1.ICSD_637796  | insulator  | insulator |
| Ge1S4Sr2.ICSD_637797  | insulator  | insulator |
| Ge1S4Ti4.ICSD_100161  | insulator  | insulator |
| Ge1S4Yb2.ICSD_637815  | insulator  | metal     |
| Ge1S8V4.ICSD_50502    | metal      | metal     |
| Ge1Sb1Ti1.ICSD_260557 | metal      | metal     |
| Ge1Sb1Zr1.ICSD_85000  | metal      | metal     |
| Ge1Sb1.ICSD_42472     | metal      | metal     |
| Ge1Sb4Te7.ICSD_42875  | insulator  | insulator |
| Ge1Sc1Tb1.ICSD_159190 | metal      | metal     |
| Ge1Sc1.ICSD_169409    | metal      | metal     |
| Ge1Sc1.ICSD_637831    | metal      | metal     |
| Ge1Se1Th1.ICSD_637884 | metal      | metal     |
| Ge1Se1U1.ICSD_26276   | metal      | metal     |
| Ge1Se1Zr1.ICSD_15574  | metal      | metal     |
| Ge1Se1.ICSD_41738     | metal      | insulator |
| Ge1Se1.ICSD_53906     | insulator  | insulator |
| Ge1Se1.ICSD_637854    | insulator  | insulator |
| Ge1Se2.ICSD_50761     | insulator  | insulator |
| Ge1Se4Sr2.ICSD_413023 | insulator  | insulator |
| Ge1Se4Yb2.ICSD_637890 | insulator  | insulator |
| Ge1Se8V4.ICSD_50503   | metal      | metal     |
| Ge1Sn1Tb1.ICSD_261752 | metal      | metal     |
| Ge1Sr1.ICSD_52703     | metal      | metal     |
| Ge1Sr2.ICSD_53923     | insulator  | metal     |
| Ge1Ta3.ICSD_108870    | metal      | metal     |

Supplementary Table 417. Five-fold cross validated predictions for the metal/insulator classification (409/598).

| system                 | calculated | predicted |
|------------------------|------------|-----------|
| Ge1Ta3.ICSD_56027      | metal      | metal     |
| Ge1Tb1Ti1.ICSD_93642   | metal      | metal     |
| Ge1Tb1.ICSD_637999     | metal      | metal     |
| Ge1Te1Th1.ICSD_638015  | metal      | metal     |
| Ge1Te1U1.ICSD_87317    | metal      | metal     |
| Ge1Te1Zr1.ICSD_15575   | metal      | metal     |
| Ge1Te1.ICSD_188458     | insulator  | insulator |
| Ge1Te1.ICSD_56042      | insulator  | insulator |
| Ge1Te1.ICSD_56604      | insulator  | insulator |
| Ge1Te1.ICSD_638005     | insulator  | insulator |
| Ge1Te1.ICSD_638009     | insulator  | insulator |
| Ge1Te4Zr1.ICSD_240906  | insulator  | insulator |
| Ge1Te5Ti2.ICSD_69035   | metal      | insulator |
| Ge1Te6Ti1.ICSD_73014   | insulator  | insulator |
| Ge1Th1.ICSD_44502      | metal      | metal     |
| Ge1Th2.ICSD_56045      | metal      | metal     |
| Ge1Ti1Tm1.ICSD_85910   | metal      | metal     |
| Ge1Ti1Y1.ICSD_85904    | metal      | metal     |
| Ge1Ti1Y1.ICSD_90234    | metal      | metal     |
| Ge1Ti2.ICSD_189708     | metal      | metal     |
| Ge1Tm1.ICSD_638068     | metal      | metal     |
| Ge1V1Zr1.ICSD_88210    | metal      | metal     |
| Ge1V3.ICSD_186004      | metal      | metal     |
| Ge1Y1Zn1.ICSD_163345   | metal      | metal     |
| Ge1Y1.ICSD_638131      | metal      | metal     |
| Ge1Yb2.ICSD_96115      | metal      | metal     |
| Ge1Zr1.ICSD_638161     | metal      | metal     |
| Ge1.ICSD_167204        | metal      | metal     |
| Ge1.ICSD_173520        | insulator  | metal     |
| Ge1.ICSD_173890        | metal      | metal     |
| Ge1.ICSD_181070        | metal      | metal     |
| Ge1.ICSD_181072        | metal      | metal     |
| Ge1.ICSD_181073        | metal      | metal     |
| Ge1.ICSD_189803        | metal      | metal     |
| Ge1.ICSD_189805        | metal      | metal     |
| Ge1.ICSD_245956        | metal      | metal     |
| Ge1.ICSD_246628        | metal      | metal     |
| Ge1.ICSD_53642         | metal      | metal     |
| Ge1.ICSD_636530        | metal      | metal     |
| Ge1.ICSD_636533        | metal      | metal     |
| Ge2Hf1Rh1.ICSD_99176   | metal      | metal     |
| Ge2Hf1.ICSD_16698      | metal      | metal     |
| Ge2Hf3.ICSD_636549     | metal      | metal     |
| Ge2Hg3K2S8.ICSD_281506 | insulator  | insulator |
| Ge2Ho1Ir1.ICSD_93337   | metal      | metal     |
| Ge2Ho1Mn2.ICSD_636635  | metal      | metal     |
| Ge2Ho1Ni1.ICSD_658574  | metal      | metal     |
| Ge2Ho1Ni2.ICSD_636645  | metal      | metal     |
| Ge2Ho1Pd2.ICSD_99112   | metal      | metal     |
| Ge2Ho1Pt1.ICSD_88227   | metal      | metal     |

Supplementary Table 418. Five-fold cross validated predictions for the metal/insulator classification (410/598).

| system                   | calculated | predicted |
|--------------------------|------------|-----------|
| Ge2Ho1Rh2_ICSD_636665    | metal      | metal     |
| Ge2Ho1Ru2_ICSD_53648     | metal      | metal     |
| Ge2Ho2In1_ICSD_172493    | metal      | metal     |
| Ge2Ho2Mg1_ICSD_423453    | metal      | metal     |
| Ge2Ho2Os1_ICSD_76350     | metal      | metal     |
| Ge2Ho2Rh1_ICSD_88198     | metal      | metal     |
| Ge2I2La2_ICSD_59801      | metal      | metal     |
| Ge2In1La2_ICSD_87511     | metal      | metal     |
| Ge2In1Li1Sr2_ICSD_280691 | metal      | metal     |
| Ge2In1Li1Yb2_ICSD_174355 | insulator  | metal     |
| Ge2In1Pr2_ICSD_414072    | metal      | metal     |
| Ge2In1Tb2_ICSD_172491    | metal      | metal     |
| Ge2In1Yb2_ICSD_172494    | metal      | metal     |
| Ge2In2O7_ICSD_20053      | insulator  | insulator |
| Ge2In2O7_ICSD_74896      | insulator  | insulator |
| Ge2In6O9Pt1_ICSD_170897  | insulator  | insulator |
| Ge2Ir1La1_ICSD_636702    | metal      | metal     |
| Ge2Ir1Tb1_ICSD_93336     | metal      | metal     |
| Ge2Ir1Y1_ICSD_76509      | metal      | metal     |
| Ge2Ir1Yb2_ICSD_412707    | metal      | metal     |
| Ge2Ir2La1_ICSD_636699    | metal      | metal     |
| Ge2Ir2Nd1_ICSD_636719    | metal      | metal     |
| Ge2Ir2Pr1_ICSD_180145    | metal      | metal     |
| Ge2Ir2Sr1_ICSD_165737    | metal      | metal     |
| Ge2Ir2Tb1_ICSD_636742    | metal      | metal     |
| Ge2Ir2Th1_ICSD_636745    | metal      | metal     |
| Ge2Ir2U1_ICSD_53660      | metal      | metal     |
| Ge2Ir2U1_ICSD_636759     | metal      | metal     |
| Ge2Ir3La1_ICSD_424816    | metal      | metal     |
| Ge2K2O6Zn1_ICSD_65740    | insulator  | insulator |
| Ge2K2O7Pb2_ICSD_30247    | insulator  | insulator |
| Ge2K2O7Zr1_ICSD_88843    | insulator  | insulator |
| Ge2K2Pb1S6_ICSD_170601   | insulator  | insulator |
| Ge2K4Se6_ICSD_300233     | insulator  | insulator |
| Ge2K6S6_ICSD_47111       | insulator  | insulator |
| Ge2K6Se6_ICSD_47112      | insulator  | insulator |
| Ge2K6Te6_ICSD_10108      | insulator  | insulator |
| Ge2La1Li1_ICSD_601105    | metal      | metal     |
| Ge2La1Mn2_ICSD_636812    | metal      | metal     |
| Ge2La1Mn2_ICSD_636814    | metal      | metal     |
| Ge2La1Ni1_ICSD_85600     | metal      | metal     |
| Ge2La1Ni2_ICSD_636821    | metal      | metal     |
| Ge2La1Pd1_ICSD_636826    | metal      | metal     |
| Ge2La1Pd2_ICSD_53662     | metal      | metal     |
| Ge2La1Pt1_ICSD_636838    | metal      | metal     |
| Ge2La1Pt2_ICSD_416421    | metal      | metal     |
| Ge2La1Pt2_ICSD_416423    | metal      | metal     |
| Ge2La1Pt2_ICSD_53665     | metal      | metal     |
| Ge2La1Pt2_ICSD_659355    | metal      | metal     |
| Ge2La1Rh1_ICSD_636850    | metal      | metal     |

Supplementary Table 419. Five-fold cross validated predictions for the metal/insulator classification (411/598).

| system                  | calculated | predicted |
|-------------------------|------------|-----------|
| Ge2La1Rh2_ICSD_636847   | metal      | metal     |
| Ge2La1Ru2_ICSD_81758    | metal      | metal     |
| Ge2La1_ICSD_636796      | metal      | metal     |
| Ge2La1_ICSD_636807      | metal      | metal     |
| Ge2La2O7_ICSD_202606    | insulator  | insulator |
| Ge2La3Ni1_ICSD_20520    | metal      | metal     |
| Ge2La3Ru2_ICSD_636861   | metal      | metal     |
| Ge2La5Si1_ICSD_636877   | metal      | metal     |
| Ge2Li1N3_ICSD_636887    | insulator  | insulator |
| Ge2Li1Nd1_ICSD_601107   | metal      | metal     |
| Ge2Li1Pr1_ICSD_601106   | metal      | metal     |
| Ge2Li1Sr1_ICSD_162582   | metal      | metal     |
| Ge2Li1Yb1_ICSD_409768   | metal      | metal     |
| Ge2Li2O5_ICSD_28178     | insulator  | insulator |
| Ge2Li4N6Sr3_ICSD_96422  | insulator  | insulator |
| Ge2Li4Zr1_ICSD_99161    | metal      | metal     |
| Ge2Li7_ICSD_42063       | metal      | metal     |
| Ge2Lu1Ni2_ICSD_106852   | metal      | metal     |
| Ge2Lu2O7_ICSD_39929     | insulator  | insulator |
| Ge2Mg1Nd2_ICSD_423449   | metal      | metal     |
| Ge2Mg1O7Sr2_ICSD_420522 | insulator  | insulator |
| Ge2Mg1Pr2_ICSD_413850   | metal      | metal     |
| Ge2Mg1Tb2_ICSD_423450   | metal      | metal     |
| Ge2Mg1Tm2_ICSD_423454   | metal      | metal     |
| Ge2Mg1Y2_ICSD_423457    | metal      | metal     |
| Ge2Mn1O7Sr2_ICSD_84033  | insulator  | insulator |
| Ge2Mn1Pd3_ICSD_637060   | metal      | metal     |
| Ge2Mn2Sr1_ICSD_403      | metal      | metal     |
| Ge2Mn2Tb1_ICSD_107109   | metal      | metal     |
| Ge2Mn2Th1_ICSD_55340    | metal      | metal     |
| Ge2Mn2Y1_ICSD_86266     | metal      | metal     |
| Ge2Mn2Yb1_ICSD_90443    | metal      | metal     |
| Ge2Mn5_ICSD_40462       | metal      | metal     |
| Ge2Mo1_ICSD_16822       | metal      | metal     |
| Ge2Mo1_ICSD_637139      | metal      | metal     |
| Ge2N2O1_ICSD_200842     | insulator  | insulator |
| Ge2N2Sr3_ICSD_82533     | metal      | metal     |
| Ge2N3Na1_ICSD_47100     | insulator  | insulator |
| Ge2N4Si1_ICSD_183103    | insulator  | insulator |
| Ge2N6Sr5_ICSD_419164    | insulator  | insulator |
| Ge2Na1O6Sc1_ICSD_22503  | insulator  | insulator |
| Ge2Na1O6V1_ICSD_99742   | metal      | insulator |
| Ge2Na2O7Zr1_ICSD_20402  | insulator  | insulator |
| Ge2Na2Se5_ICSD_40453    | insulator  | insulator |
| Ge2Na6S7_ICSD_25388     | insulator  | insulator |
| Ge2Na6Se6_ICSD_61400    | insulator  | insulator |
| Ge2Na6Te6_ICSD_47113    | insulator  | insulator |
| Ge2Nb1_ICSD_637208      | metal      | metal     |
| Ge2Nd1Ni1_ICSD_57094    | metal      | metal     |
| Ge2Nd1Ni1_ICSD_637291   | metal      | metal     |

Supplementary Table 420. Five-fold cross validated predictions for the metal/insulator classification (412/598).

| system                   | calculated | predicted |
|--------------------------|------------|-----------|
| Ge2Nd1Ni2.ICSD_53728     | metal      | metal     |
| Ge2Nd1Pd1.ICSD_637300    | metal      | metal     |
| Ge2Nd1Pd2.ICSD_247283    | metal      | metal     |
| Ge2Nd1Pt2.ICSD_637303    | metal      | metal     |
| Ge2Nd1Pt2.ICSD_637305    | metal      | metal     |
| Ge2Nd1Rh1.ICSD_637311    | metal      | metal     |
| Ge2Nd1Rh2.ICSD_637310    | metal      | metal     |
| Ge2Nd1Ru2.ICSD_53739     | metal      | metal     |
| Ge2Nd1.ICSD_637255       | metal      | metal     |
| Ge2Nd2Zn15.ICSD_94220    | metal      | metal     |
| Ge2Ni1Pr1.ICSD_637376    | metal      | metal     |
| Ge2Ni1Tb1.ICSD_657199    | metal      | metal     |
| Ge2Ni1Tb3.ICSD_185872    | metal      | metal     |
| Ge2Ni1Y1.ICSD_637438     | metal      | metal     |
| Ge2Ni1.ICSD_90341        | metal      | metal     |
| Ge2Ni2Pr1.ICSD_167938    | metal      | metal     |
| Ge2Ni2Pr1.ICSD_93413     | metal      | metal     |
| Ge2Ni2Sr1.ICSD_637397    | metal      | metal     |
| Ge2Ni2Tb1.ICSD_150833    | metal      | metal     |
| Ge2Ni2Th1.ICSD_55343     | metal      | metal     |
| Ge2Ni2U1.ICSD_637428     | metal      | metal     |
| Ge2Ni2Y1.ICSD_62933      | metal      | metal     |
| Ge2Ni2Yb1.ICSD_637442    | metal      | metal     |
| Ge2Ni3Sr1.ICSD_419660    | metal      | metal     |
| Ge2Ni5.ICSD_637367       | metal      | metal     |
| Ge2Ni7Zn6.ICSD_52178     | metal      | metal     |
| Ge2O7Sr2Zn1.ICSD_420521  | insulator  | insulator |
| Ge2O7Yb2.ICSD_65618      | insulator  | metal     |
| Ge2Os1.ICSD_43690        | insulator  | metal     |
| Ge2Os2Th1.ICSD_637475    | metal      | metal     |
| Ge2P2Rb6Se14.ICSD_261951 | insulator  | insulator |
| Ge2P4Sr3.ICSD_41182      | insulator  | insulator |
| Ge2Pd1Tb1.ICSD_106940    | metal      | metal     |
| Ge2Pd2Sr1.ICSD_165985    | metal      | metal     |
| Ge2Pd2Tb1.ICSD_53883     | metal      | metal     |
| Ge2Pd2Th1.ICSD_53884     | metal      | metal     |
| Ge2Pd2U1.ICSD_53885      | metal      | metal     |
| Ge2Pd2Yb1.ICSD_637567    | metal      | metal     |
| Ge2Pr1Rh2.ICSD_167942    | metal      | metal     |
| Ge2Pr1Rh2.ICSD_167944    | metal      | metal     |
| Ge2Pr1Ru2.ICSD_167945    | metal      | metal     |
| Ge2Pr1.ICSD_637607       | metal      | metal     |
| Ge2Pr1.ICSD_658011       | metal      | metal     |
| Ge2Pt1Tb1.ICSD_95142     | metal      | metal     |
| Ge2Pt1Y1.ICSD_601773     | metal      | metal     |
| Ge2Pt1.ICSD_637638       | metal      | metal     |
| Ge2Pt2Tb1.ICSD_637655    | metal      | metal     |
| Ge2Pt2Th1.ICSD_53888     | metal      | metal     |
| Ge2Pt2Th1.ICSD_637658    | metal      | metal     |
| Ge2Pt2U1.ICSD_53889      | metal      | metal     |

Supplementary Table 421. Five-fold cross validated predictions for the metal/insulator classification (413/598).

| system                 | calculated | predicted |
|------------------------|------------|-----------|
| Ge2Pt2U1.ICSD_657185   | metal      | metal     |
| Ge2Pt2Y1.ICSD_637662   | metal      | metal     |
| Ge2Rb4S6.ICSD_409729   | insulator  | insulator |
| Ge2Rb4Se6.ICSD_402719  | insulator  | insulator |
| Ge2Re1.ICSD_637671     | metal      | metal     |
| Ge2Rh2Sr1.ICSD_77145   | metal      | metal     |
| Ge2Rh2Tb1.ICSD_637700  | metal      | metal     |
| Ge2Rh2Th1.ICSD_53895   | metal      | metal     |
| Ge2Rh2U1.ICSD_53896    | metal      | metal     |
| Ge2Rh2U1.ICSD_603847   | metal      | metal     |
| Ge2Rh2U1.ICSD_637716   | metal      | metal     |
| Ge2Rh2Y1.ICSD_637725   | metal      | metal     |
| Ge2Rh2Yb1.ICSD_637734  | metal      | metal     |
| Ge2Ru1Tb2.ICSD_91969   | metal      | metal     |
| Ge2Ru2Sr1.ICSD_77144   | metal      | metal     |
| Ge2Ru2Tb1.ICSD_53897   | metal      | metal     |
| Ge2Ru2Tb1.ICSD_637754  | metal      | metal     |
| Ge2Ru2Th1.ICSD_637761  | metal      | metal     |
| Ge2Ru2Y1.ICSD_52766    | metal      | metal     |
| Ge2Ru2Yb1.ICSD_637774  | metal      | metal     |
| Ge2S6Ti4.ICSD_2240     | insulator  | insulator |
| Ge2Sb2Te5.ICSD_42876   | insulator  | insulator |
| Ge2Sc1.ICSD_637839     | metal      | metal     |
| Ge2Se6Ti4.ICSD_35043   | insulator  | insulator |
| Ge2Sr1Zn2.ICSD_411     | metal      | metal     |
| Ge2Sr1.ICSD_10000      | metal      | metal     |
| Ge2Sr1.ICSD_152799     | insulator  | metal     |
| Ge2Ta1.ICSD_637963     | metal      | metal     |
| Ge2Tb1.ICSD_638002     | metal      | metal     |
| Ge2Te6Ti6.ICSD_49658   | insulator  | insulator |
| Ge2Th1.ICSD_44500      | metal      | metal     |
| Ge2Th1.ICSD_56046      | metal      | metal     |
| Ge2Th1.ICSD_638030     | metal      | metal     |
| Ge2Th3.ICSD_638039     | metal      | metal     |
| Ge2Ti1.ICSD_638053     | metal      | metal     |
| Ge2Tm1.ICSD_638067     | metal      | metal     |
| Ge2U1.ICSD_56049       | metal      | metal     |
| Ge2U1.ICSD_82702       | metal      | metal     |
| Ge2V1.ICSD_638088      | metal      | metal     |
| Ge2W1.ICSD_638115      | metal      | metal     |
| Ge2W1.ICSD_9978        | metal      | metal     |
| Ge2Y1.ICSD_76344       | metal      | metal     |
| Ge2Zr1.ICSD_638152     | metal      | metal     |
| Ge30In16K8.ICSD_636686 | metal      | metal     |
| Ge38I8P8.ICSD_16533    | insulator  | insulator |
| Ge3Hf5.ICSD_44361      | metal      | metal     |
| Ge3Ho2Pt9.ICSD_415205  | metal      | metal     |
| Ge3Ho3Ir2.ICSD_82875   | metal      | metal     |
| Ge3Ho3Ru2.ICSD_425773  | metal      | metal     |
| Ge3Ho5.ICSD_636616     | metal      | metal     |

Supplementary Table 422. Five-fold cross validated predictions for the metal/insulator classification (414/598).

| system                  | calculated | predicted |
|-------------------------|------------|-----------|
| Ge3I5La6.ICSD.414175    | metal      | metal     |
| Ge3Ir1La1.ICSD.636700   | metal      | metal     |
| Ge3Ir1Sr1.ICSD.168861   | metal      | metal     |
| Ge3Ir2S3.ICSD.636729    | metal      | metal     |
| Ge3Ir2Se3.ICSD.636733   | metal      | metal     |
| Ge3Ir2Tb3.ICSD.425777   | metal      | metal     |
| Ge3K1O9Ta1.ICSD.10380   | insulator  | insulator |
| Ge3La1Os1.ICSD.636822   | metal      | metal     |
| Ge3La1Rh1.ICSD.636848   | metal      | metal     |
| Ge3La1Ru1.ICSD.636856   | metal      | metal     |
| Ge3La1Ti1.ICSD.154047   | metal      | metal     |
| Ge3La1V1.ICSD.164891    | metal      | metal     |
| Ge3La1.ICSD.261501      | metal      | metal     |
| Ge3La2Li2.ICSD.262431   | metal      | metal     |
| Ge3La2O9.ICSD.83341     | insulator  | insulator |
| Ge3La2Zn6.ICSD.98232    | metal      | metal     |
| Ge3La4S12.ICSD.2046     | insulator  | insulator |
| Ge3La4.ICSD.76313       | metal      | metal     |
| Ge3La5.ICSD.636790      | metal      | metal     |
| Ge3Li2Lu3.ICSD.57074    | metal      | metal     |
| Ge3Li2Ni1O8.ICSD.68339  | insulator  | insulator |
| Ge3Lu3Ni2.ICSD.88246    | metal      | metal     |
| Ge3Lu3Ru2.ICSD.425776   | metal      | metal     |
| Ge3Lu5.ICSD.601111      | metal      | metal     |
| Ge3Mn5.ICSD.76138       | metal      | metal     |
| Ge3Mo5.ICSD.637143      | metal      | metal     |
| Ge3Mo5.ICSD.77281       | metal      | metal     |
| Ge3N4.ICSD.156339       | insulator  | insulator |
| Ge3N4.ICSD.637162       | insulator  | insulator |
| Ge3N4.ICSD.658934       | insulator  | insulator |
| Ge3N4.ICSD.87767        | insulator  | insulator |
| Ge3N4.ICSD.97569        | insulator  | insulator |
| Ge3Na1P3.ICSD.184000    | insulator  | insulator |
| Ge3Nb1O9Rb1.ICSD.10382  | insulator  | insulator |
| Ge3Nb5.ICSD.2003        | metal      | metal     |
| Ge3Nb5.ICSD.44741       | metal      | metal     |
| Ge3Nd2Zn6.ICSD.98235    | metal      | metal     |
| Ge3Ni5.ICSD.53746       | metal      | metal     |
| Ge3O12Sb4.ICSD.421470   | insulator  | insulator |
| Ge3O12Sr3Y2.ICSD.80582  | insulator  | insulator |
| Ge3O25P6Si2.ICSD.202643 | insulator  | insulator |
| Ge3O8Zn2.ICSD.27103     | insulator  | insulator |
| Ge3O9Rb1Ta1.ICSD.10381  | insulator  | insulator |
| Ge3O9Sb2.ICSD.95735     | insulator  | insulator |
| Ge3O9Ta1Ti1.ICSD.10383  | insulator  | insulator |
| Ge3O9Ti1Ti2.ICSD.19029  | insulator  | insulator |
| Ge3Os2.ICSD.95593       | insulator  | metal     |
| Ge3Pd1Sr1.ICSD.168862   | metal      | metal     |
| Ge3Pr1Rh1.ICSD.160385   | metal      | metal     |
| Ge3Pr1V1.ICSD.164893    | metal      | metal     |

Supplementary Table 423. Five-fold cross validated predictions for the metal/insulator classification (415/598).

| system                   | calculated | predicted |
|--------------------------|------------|-----------|
| Ge3Pr2Zn6.ICSD.98234     | metal      | metal     |
| Ge3Pr4.ICSD.637571       | metal      | metal     |
| Ge3Pt1Sr1.ICSD.168863    | metal      | metal     |
| Ge3Pt2.ICSD.42912        | metal      | metal     |
| Ge3Pt9Tb2.ICSD.415207    | metal      | metal     |
| Ge3Pu1.ICSD.157520       | metal      | metal     |
| Ge3Rh5.ICSD.53891        | metal      | metal     |
| Ge3Ru2Tb3.ICSD.425771    | metal      | metal     |
| Ge3Ru2.ICSD.95589        | insulator  | metal     |
| Ge3Sb5Yb8.ICSD.170575    | metal      | metal     |
| Ge3Sc5.ICSD.602017       | metal      | metal     |
| Ge3Sr5.ICSD.409374       | metal      | metal     |
| Ge3Ta5.ICSD.44744        | metal      | metal     |
| Ge3Ta5.ICSD.637960       | metal      | metal     |
| Ge3Tb5.ICSD.56034        | metal      | metal     |
| Ge3Ti5.ICSD.638051       | metal      | metal     |
| Ge3U1.ICSD.638072        | metal      | metal     |
| Ge3V1.ICSD.638098        | metal      | metal     |
| Ge3V5.ICSD.44504         | metal      | metal     |
| Ge3V5.ICSD.638081        | metal      | metal     |
| Ge3W5.ICSD.638119        | metal      | metal     |
| Ge3Y5.ICSD.638128        | metal      | metal     |
| Ge3Yb2Zn3.ICSD.152947    | metal      | metal     |
| Ge3Yb5.ICSD.638147       | metal      | metal     |
| Ge3Zr5.ICSD.76315        | metal      | metal     |
| Ge40In6K8.ICSD.400448    | metal      | metal     |
| Ge46K8.ICSD.26300        | metal      | metal     |
| Ge4Hf2Nb3.ICSD.172870    | metal      | metal     |
| Ge4Hf3Nb2.ICSD.172872    | metal      | metal     |
| Ge4Hf3Ni4.ICSD.86690     | metal      | metal     |
| Ge4Hf4Nb1.ICSD.172869    | metal      | metal     |
| Ge4Hf5.ICSD.76306        | metal      | metal     |
| Ge4Ho3Pd4.ICSD.96158     | metal      | metal     |
| Ge4Ho3.ICSD.86103        | metal      | metal     |
| Ge4Ho4In1Ni2.ICSD.240336 | metal      | metal     |
| Ge4I4S6.ICSD.24371       | insulator  | insulator |
| Ge4In1Ni2Tm4.ICSD.240337 | metal      | metal     |
| Ge4Ir1.ICSD.42773        | metal      | metal     |
| Ge4Ir1.ICSD.636695       | metal      | metal     |
| Ge4K4Se10.ICSD.300262    | insulator  | insulator |
| Ge4La1Ni9.ICSD.184406    | metal      | metal     |
| Ge4La1Rh6.ICSD.426482    | metal      | metal     |
| Ge4La3Li4.ICSD.262432    | metal      | metal     |
| Ge4La5.ICSD.636782       | metal      | metal     |
| Ge4Li15.ICSD.43235       | metal      | metal     |
| Ge4Li4Yb5.ICSD.57076     | metal      | metal     |
| Ge4Li9.ICSD.25308        | metal      | metal     |
| Ge4Na1O12P3.ICSD.240922  | insulator  | insulator |
| Ge4Na4S10.ICSD.25382     | insulator  | insulator |
| Ge4Na4Se10.ICSD.300263   | insulator  | insulator |

Supplementary Table 424. Five-fold cross validated predictions for the metal/insulator classification (416/598).

| system                | calculated | predicted |
|-----------------------|------------|-----------|
| Ge4Na8Se10.ICSD.61401 | insulator  | insulator |
| Ge4Na8Te10.ICSD.37183 | insulator  | insulator |
| Ge4Nb3Zr2.ICSD.20809  | metal      | metal     |
| Ge4Nb5.ICSD.172871    | metal      | metal     |
| Ge4Ni4Sc3.ICSD.53857  | metal      | metal     |
| Ge4Ni9Pr1.ICSD.600192 | metal      | metal     |
| Ge4O9Pb1.ICSD.201282  | insulator  | insulator |
| Ge4Pd4Yb3.ICSD.411182 | metal      | metal     |
| Ge4Pr1Rh6.ICSD.426483 | metal      | metal     |
| Ge4Rh1.ICSD.637677    | metal      | metal     |
| Ge4S10Ti4.ICSD.640    | insulator  | insulator |
| Ge4Se10Ti4.ICSD.26415 | insulator  | insulator |
| Ge4Y3.ICSD.88105      | metal      | metal     |
| Ge4Zr5.ICSD.638154    | metal      | metal     |
| Ge5Ho2Rh3.ICSD.63616  | metal      | metal     |
| Ge5Ho3.ICSD.54493     | metal      | metal     |
| Ge5Ir3La2.ICSD.86499  | metal      | metal     |
| Ge5Ir3Y2.ICSD.86503   | metal      | metal     |
| Ge5Ir4.ICSD.636696    | metal      | metal     |
| Ge5La2Rh3.ICSD.86502  | metal      | metal     |
| Ge5La2Ru3.ICSD.86500  | metal      | metal     |
| Ge5Mg14O24.ICSD.9371  | insulator  | insulator |
| Ge5N2Sr6.ICSD.154397  | metal      | metal     |
| Ge5Nd1.ICSD.246814    | metal      | metal     |
| Ge5Nd1.ICSD.710017    | metal      | metal     |
| Ge5Nd3.ICSD.53726     | metal      | metal     |
| Ge5O25P6.ICSD.9212    | insulator  | insulator |
| Ge5Pr1.ICSD.246813    | metal      | metal     |
| Ge5Tb1.ICSD.247400    | metal      | metal     |
| Ge5Tb3.ICSD.419457    | metal      | metal     |
| Ge5Ti6.ICSD.15304     | metal      | metal     |
| Ge5Y3.ICSD.20612      | metal      | metal     |
| Ge5Yb3.ICSD.600981    | metal      | metal     |
| Ge5Yb3.ICSD.97355     | metal      | metal     |
| Ge6Hf1Mn6.ICSD.155117 | metal      | metal     |
| Ge6Ho1Mn6.ICSD.656761 | metal      | metal     |
| Ge6Ho4Ir7.ICSD.636630 | metal      | metal     |
| Ge6Ho4Rh7.ICSD.636663 | metal      | metal     |
| Ge6Ir7Lu4.ICSD.636712 | metal      | metal     |
| Ge6Ir7Mn4.ICSD.153071 | metal      | metal     |
| Ge6Ir7Sc4.ICSD.636731 | metal      | metal     |
| Ge6Ir7Tb4.ICSD.636740 | metal      | metal     |
| Ge6Ir7Tm4.ICSD.636749 | metal      | metal     |
| Ge6Ir7Y4.ICSD.636762  | metal      | metal     |
| Ge6Ir7Yb4.ICSD.636768 | metal      | metal     |
| Ge6La11Ni4.ICSD.62290 | metal      | metal     |
| Ge6Li1Ni6.ICSD.41463  | metal      | metal     |
| Ge6Li2Sr4.ICSD.414573 | metal      | metal     |
| Ge6Li2Sr4.ICSD.414574 | metal      | metal     |
| Ge6Li2Sr4.ICSD.414575 | metal      | metal     |

Supplementary Table 425. Five-fold cross validated predictions for the metal/insulator classification (417/598).

| system                       | calculated | predicted |
|------------------------------|------------|-----------|
| Ge6Lu4Os7.ICSD.636925        | metal      | metal     |
| Ge6Lu4Rh7.ICSD.90200         | metal      | metal     |
| Ge6Lu4Ru7.ICSD.90199         | metal      | metal     |
| Ge6Mg1Ni6.ICSD.636950        | metal      | metal     |
| Ge6Mn6Sc1.ICSD.637078        | metal      | metal     |
| Ge6Mn6Sc1.ICSD.656754        | metal      | metal     |
| Ge6Mn6Tb1.ICSD.656759        | metal      | metal     |
| Ge6Mn6Y1.ICSD.656755         | metal      | metal     |
| Ge6Mn6Zr1.ICSD.89433         | metal      | metal     |
| Ge6Os7Sc4.ICSD.637471        | metal      | metal     |
| Ge6Os7U4.ICSD.637483         | metal      | metal     |
| Ge6Os7Yb4.ICSD.637489        | metal      | metal     |
| Ge6Pt4Y3.ICSD.76293          | metal      | metal     |
| Ge6Rh7Sc4.ICSD.84201         | metal      | metal     |
| Ge6Rh7Yb4.ICSD.413983        | metal      | metal     |
| Ge6Ru7Sc4.ICSD.637747        | metal      | metal     |
| Ge6Ru7U4.ICSD.637767         | metal      | metal     |
| Ge6Tc7U4.ICSD.80521          | metal      | metal     |
| Ge7H8N2O15.ICSD.407222       | insulator  | insulator |
| Ge7Hf6Ni16.ICSD.109125       | metal      | metal     |
| Ge7Ir3.ICSD.53656            | metal      | metal     |
| Ge7Mg6Ni16.ICSD.53680        | metal      | metal     |
| Ge7Mn6Ni16.ICSD.637032       | metal      | metal     |
| Ge7Nb6Ni16.ICSD.109124       | metal      | metal     |
| Ge7Ni16Sc6.ICSD.637387       | metal      | metal     |
| Ge7Ni16Ta6.ICSD.637403       | metal      | metal     |
| Ge7Ni16Ti6.ICSD.109123       | metal      | metal     |
| Ge7Ni16Zr6.ICSD.637449       | metal      | metal     |
| Ge7Re3.ICSD.84208            | metal      | metal     |
| Ge8Li7Rb1.ICSD.411606        | metal      | metal     |
| Ge8Na6Pt8.ICSD.32038         | metal      | metal     |
| Ge8Yb3.ICSD.97356            | metal      | metal     |
| Ge9Li4O20.ICSD.34361         | insulator  | insulator |
| Ge9Nd2.ICSD.263089           | metal      | metal     |
| Ge9Pd25.ICSD.87204           | metal      | metal     |
| H0.333Y1.ICSD.152860         | metal      | metal     |
| H0.667Y1.ICSD.152861         | metal      | metal     |
| H10In1N3O14.ICSD.417341      | insulator  | insulator |
| H10In2O17S3.ICSD.391355      | insulator  | insulator |
| H10Mn1N1Na1O10P2.ICSD.413407 | insulator  | insulator |
| H10Mn1N4O8S2.ICSD.249335     | metal      | insulator |
| H10N2O8P2.ICSD.14169         | insulator  | insulator |
| H10N3Nd1O11S3.ICSD.410898    | insulator  | insulator |
| H10N4O4S1.ICSD.24103         | insulator  | insulator |
| H10O10S1V1.ICSD.23308        | metal      | insulator |
| H10O8S1.ICSD.2783            | insulator  | insulator |
| H10O8Se1.ICSD.404659         | insulator  | insulator |
| H10O8Se1.ICSD.404660         | metal      | insulator |
| H11N2O4P1.ICSD.32572         | insulator  | insulator |
| H11Na2O8P1.ICSD.1602         | insulator  | insulator |

Supplementary Table 426. Five-fold cross validated predictions for the metal/insulator classification (418/598).

| system                    | calculated | predicted |
|---------------------------|------------|-----------|
| H12I8Mg1O6.ICSD.32507     | insulator  | insulator |
| H12K2N6Sn1.ICSD.79985     | insulator  | insulator |
| H12Li3O10V1.ICSD.174238   | insulator  | insulator |
| H12Li4N4O12P4.ICSD.415548 | insulator  | insulator |
| H12Mg1N6O6.ICSD.61681     | insulator  | insulator |
| H12Mg1O12S2.ICSD.1834     | metal      | insulator |
| H12Mg1O9S1.ICSD.48112     | insulator  | insulator |
| H12Mg1O9S2.ICSD.35664     | insulator  | insulator |
| H12Mg1O9Se1.ICSD.48115    | insulator  | insulator |
| H12Mg1O9Te1.ICSD.48114    | insulator  | insulator |
| H12Mn1N2O10S2.ICSD.410200 | insulator  | insulator |
| H12Mn2N4O8Zn1.ICSD.162384 | insulator  | insulator |
| H12N10O8Pd1.ICSD.412607   | insulator  | insulator |
| H12N16Pd2.ICSD.410384     | insulator  | insulator |
| H12N2Ni1O10S2.ICSD.410198 | insulator  | insulator |
| H12N2O14U1.ICSD.23825     | insulator  | insulator |
| H12N3Nb1O8.ICSD.161455    | insulator  | insulator |
| H12N4O4P2.ICSD.6211       | insulator  | insulator |
| H12N6Na2Sn1.ICSD.83963    | insulator  | insulator |
| H12N6Ni1O4.ICSD.201209    | insulator  | insulator |
| H12Na2O9Si1.ICSD.9171     | insulator  | insulator |
| H12Ni1O9S1.ICSD.26149     | insulator  | insulator |
| H12O12S2Zn1.ICSD.1836     | insulator  | insulator |
| H12O18P4Sr2.ICSD.61237    | insulator  | insulator |
| H13Mg1O9P1.ICSD.74520     | insulator  | insulator |
| H14La2Ni10.ICSD.260376    | metal      | metal     |
| H14N4O6Ru1S2.ICSD.40202   | insulator  | insulator |
| H14N4O8S2.ICSD.73623      | insulator  | insulator |
| H15Th4.ICSD.638495        | metal      | metal     |
| H16Mg1N1O10P1.ICSD.29385  | insulator  | insulator |
| H16Mg1O10P2.ICSD.250187   | insulator  | insulator |
| H16Mg6Nb1.ICSD.169055     | metal      | metal     |
| H16Mg6Ti1.ICSD.169053     | metal      | metal     |
| H16Mg6V1.ICSD.169054      | metal      | metal     |
| H16Mg7Nb1.ICSD.169052     | metal      | metal     |
| H16Mg7Ti1.ICSD.169050     | metal      | metal     |
| H16Mg7V1.ICSD.169051      | metal      | metal     |
| H16N2O16P4Zn1.ICSD.59919  | insulator  | insulator |
| H16N4O12P4.ICSD.16148     | insulator  | insulator |
| H16Ni1O10P2.ICSD.281216   | insulator  | insulator |
| H16O20S3Y2.ICSD.281358    | insulator  | insulator |
| H1Hg1N1O4.ICSD.6186       | insulator  | insulator |
| H1Ho1O2.ICSD.2944         | insulator  | insulator |
| H1Ho1Se1.ICSD.78957       | insulator  | metal     |
| H1I1Li2O1.ICSD.74930      | insulator  | insulator |
| H1I1O3.ICSD.415140        | insulator  | insulator |
| H1I1O3.ICSD.66643         | insulator  | insulator |
| H1I1O4Zn1.ICSD.185598     | insulator  | insulator |
| H1I1Sr1.ICSD.25546        | insulator  | insulator |
| H1In1O2.ICSD.166255       | insulator  | insulator |

Supplementary Table 427. Five-fold cross validated predictions for the metal/insulator classification (419/598).

| system                   | calculated | predicted |
|--------------------------|------------|-----------|
| H1In1O2.ICSD.166257      | insulator  | insulator |
| H1In1O2.ICSD.24093       | insulator  | insulator |
| H1In1O4Se1.ICSD.415267   | insulator  | insulator |
| H1K1O1.ICSD.61047        | insulator  | insulator |
| H1K1O3Se1.ICSD.20862     | insulator  | insulator |
| H1K1O3Si1.ICSD.30892     | insulator  | insulator |
| H1K1O7Se2V1.ICSD.82535   | insulator  | insulator |
| H1K1O8P2Zn2.ICSD.412588  | insulator  | insulator |
| H1K1.ICSD.183287         | insulator  | insulator |
| H1K2N1O6S2.ICSD.15880    | insulator  | insulator |
| H1K3O8S2.ICSD.249551     | insulator  | insulator |
| H1K6Na15Ti18.ICSD.81301  | metal      | metal     |
| H1La1N1O4.ICSD.413563    | metal      | insulator |
| H1La1Ni1Sn1.ICSD.157925  | metal      | metal     |
| H1La1O1.ICSD.48122       | insulator  | insulator |
| H1La1O2.ICSD.60675       | insulator  | insulator |
| H1La2Li1O3.ICSD.56744    | insulator  | insulator |
| H1Li1Nd2O3.ICSD.56747    | insulator  | insulator |
| H1Li1O3P1Ti1.ICSD.201040 | insulator  | insulator |
| H1Li1O3Se1.ICSD.8255     | insulator  | insulator |
| H1Li1O4S1.ICSD.82373     | insulator  | insulator |
| H1Li1Pd1.ICSD.246613     | metal      | metal     |
| H1Li1S1.ICSD.98019       | insulator  | insulator |
| H1Li1S1.ICSD.98020       | insulator  | insulator |
| H1Li1S1.ICSD.98021       | insulator  | insulator |
| H1Li1.ICSD.173192        | insulator  | insulator |
| H1Li2N1.ICSD.168791      | insulator  | insulator |
| H1Li2N1.ICSD.169858      | insulator  | insulator |
| H1Li2O8P2Sc1.ICSD.409955 | insulator  | insulator |
| H1Li3O4Te1.ICSD.38036    | insulator  | insulator |
| H1Li4N1.ICSD.409633      | insulator  | insulator |
| H1Mg1Na3O8P2.ICSD.81226  | insulator  | insulator |
| H1Mg1Ni1.ICSD.187257     | metal      | metal     |
| H1Mg2O5P1.ICSD.40828     | insulator  | insulator |
| H1Mn1O2.ICSD.27457       | insulator  | insulator |
| H1Mn1O2.ICSD.84948       | metal      | insulator |
| H1Mn1O2.ICSD.84949       | insulator  | insulator |
| H1Mn1O7P2.ICSD.415152    | insulator  | insulator |
| H1Mn1.ICSD.108535        | metal      | metal     |
| H1Mo1.ICSD.108537        | metal      | metal     |
| H1N1O4Zn1.ICSD.415537    | insulator  | insulator |
| H1N1Sr1.ICSD.410656      | insulator  | insulator |
| H1N2O9P1Pb2.ICSD.260268  | insulator  | insulator |
| H1N3Si2.ICSD.202970      | insulator  | insulator |
| H1Na1O1.ICSD.41231       | insulator  | insulator |
| H1Na1O1.ICSD.61045       | insulator  | insulator |
| H1Na1O4S1.ICSD.1436      | insulator  | insulator |
| H1Na1O4Se1.ICSD.88893    | insulator  | insulator |
| H1Na1O4Si1Zn1.ICSD.88001 | insulator  | insulator |
| H1Na1O7P2Zn1.ICSD.39491  | insulator  | insulator |

Supplementary Table 428. Five-fold cross validated predictions for the metal/insulator classification (420/598).

| system                    | calculated | predicted |
|---------------------------|------------|-----------|
| H1Na1O8P2Zn2.ICSD.73954   | insulator  | insulator |
| H1Na1.ICSD.261353         | insulator  | insulator |
| H1Na1.ICSD.261354         | insulator  | insulator |
| H1Na2O3P1.ICSD.155976     | metal      | insulator |
| H1Na2O5P1Zn1.ICSD.280153  | insulator  | insulator |
| H1Nd1Ni1Sn1.ICSD.157928   | metal      | metal     |
| H1Nd1O2.ICSD.162390       | insulator  | insulator |
| H1Ni1O2.ICSD.169980       | metal      | insulator |
| H1Ni1O2.ICSD.169981       | insulator  | metal     |
| H1Ni1Pr1Sn1.ICSD.157927   | metal      | metal     |
| H1Ni1Ti2.ICSD.108767      | metal      | metal     |
| H1Ni1.ICSD.56077          | metal      | metal     |
| H1Ni2.ICSD.201088         | metal      | metal     |
| H1O10P3Pb2.ICSD.2494      | insulator  | insulator |
| H1O1Rb1.ICSD.61048        | insulator  | insulator |
| H1O2Tb1.ICSD.6164         | insulator  | insulator |
| H1O2Y1.ICSD.28442         | insulator  | insulator |
| H1O2Yb1.ICSD.26341        | insulator  | metal     |
| H1O3P1Sn1.ICSD.25034      | insulator  | insulator |
| H1O4P1Sn1.ICSD.658        | insulator  | insulator |
| H1O4Rb1S1.ICSD.36326      | insulator  | insulator |
| H1O5P1Zn2.ICSD.62245      | insulator  | insulator |
| H1O5P1Zn2.ICSD.79334      | insulator  | insulator |
| H1O5P1Zn2.ICSD.81313      | insulator  | insulator |
| H1O5Rb5Si1.ICSD.417054    | insulator  | insulator |
| H1O8P2Rb1Zn2.ICSD.280530  | insulator  | insulator |
| H1O8Rb3S2.ICSD.60050      | insulator  | insulator |
| H1Pd1Ti2.ICSD.167656      | metal      | metal     |
| H1Pd1.ICSD.638418         | metal      | metal     |
| H1Pd3Ti1.ICSD.247273      | metal      | metal     |
| H1Rb1.ICSD.183292         | insulator  | insulator |
| H1Rh1.ICSD.56168          | metal      | metal     |
| H1Se1Y1.ICSD.72008        | insulator  | metal     |
| H1Si1.ICSD.41478          | insulator  | insulator |
| H1Si3Y5.ICSD.638464       | metal      | metal     |
| H1Ta2.ICSD.41774          | metal      | metal     |
| H1Ti1.ICSD.168325         | metal      | metal     |
| H1V2.ICSD.61422           | metal      | metal     |
| H1V2.ICSD.61423           | metal      | metal     |
| H1W1.ICSD.247587          | metal      | metal     |
| H1Zr1.ICSD.169451         | metal      | metal     |
| H1.ICSD.426942            | insulator  | insulator |
| H2.25La1.ICSD.187682      | metal      | metal     |
| H20N4O2P4S8.ICSD.16451    | insulator  | insulator |
| H24Li2N8Te2.ICSD.409556   | insulator  | insulator |
| H2Hf1.ICSD.24721          | metal      | metal     |
| H2Hf2Pd1.ICSD.638175      | metal      | metal     |
| H2Hg1O5Se1.ICSD.1712      | insulator  | insulator |
| H2Hg2O11S2Zn2.ICSD.413515 | insulator  | insulator |
| H2Ho1.ICSD.56057          | metal      | metal     |

Supplementary Table 429. Five-fold cross validated predictions for the metal/insulator classification (421/598).

| system                       | calculated | predicted |
|------------------------------|------------|-----------|
| H2I2O1Sr1.ICSD.76503         | insulator  | insulator |
| H2I3K1O1.ICSD.26338          | insulator  | insulator |
| H2In1O5P1.ICSD.86674         | insulator  | insulator |
| H2K1Mn1O5P1.ICSD.71177       | insulator  | insulator |
| H2K1N1O3S1.ICSD.15324        | insulator  | insulator |
| H2K1N1.ICSD.25619            | insulator  | insulator |
| H2K1O2P1.ICSD.59833          | insulator  | insulator |
| H2K1O3P1S1.ICSD.75217        | insulator  | insulator |
| H2K1O4P1.ICSD.186817         | insulator  | insulator |
| H2K1O4P1.ICSD.29258          | insulator  | insulator |
| H2K1O4P1.ICSD.31151          | insulator  | insulator |
| H2K1O4P1.ICSD.87895          | insulator  | insulator |
| H2K1O6P2V1.ICSD.423276       | metal      | insulator |
| H2K2Mn3O10V2.ICSD.203214     | insulator  | insulator |
| H2K2O5Ru1.ICSD.36593         | insulator  | insulator |
| H2K2O7P2.ICSD.36043          | insulator  | insulator |
| H2K3O10Si3Tb1.ICSD.413425    | insulator  | insulator |
| H2La1N1O7S1.ICSD.415675      | insulator  | insulator |
| H2La1Ni1Sn1.ICSD.157929      | metal      | metal     |
| H2La1.ICSD.638229            | metal      | metal     |
| H2Li1N1O3.ICSD.37180         | insulator  | insulator |
| H2Li1N1Sr2.ICSD.417994       | insulator  | insulator |
| H2Li1N1.ICSD.168792          | insulator  | insulator |
| H2Li1O2P1.ICSD.59823         | insulator  | insulator |
| H2Li1O3P1.ICSD.15045         | insulator  | insulator |
| H2Li1O3P1.ICSD.7             | insulator  | insulator |
| H2Li1O5P1Zn1.ICSD.79351      | insulator  | insulator |
| H2Li2Mg1N2.ICSD.165890       | insulator  | insulator |
| H2Li2O5S1.ICSD.20617         | insulator  | insulator |
| H2Li2O5Se1.ICSD.281276       | insulator  | insulator |
| H2Li2Pd1.ICSD.108534         | metal      | metal     |
| H2Lu1.ICSD.56067             | metal      | metal     |
| H2Mg0.125Ti0.875.ICSD.168835 | metal      | metal     |
| H2Mg1Mo1O5.ICSD.202695       | insulator  | insulator |
| H2Mg1Ni1.ICSD.187258         | metal      | metal     |
| H2Mg1O2.ICSD.79032           | insulator  | insulator |
| H2Mg1O5S1.ICSD.26304         | insulator  | insulator |
| H2Mg1O5Se1.ICSD.66745        | insulator  | insulator |
| H2Mg1O6Se2.ICSD.59310        | insulator  | insulator |
| H2Mg1O8S2.ICSD.62325         | insulator  | insulator |
| H2Mg1O8Se2.ICSD.66966        | insulator  | insulator |
| H2Mg1.ICSD.155807            | insulator  | insulator |
| H2Mg1.ICSD.155808            | insulator  | insulator |
| H2Mg1.ICSD.155809            | insulator  | insulator |
| H2Mg1.ICSD.155810            | insulator  | insulator |
| H2Mg1.ICSD.155811            | insulator  | insulator |
| H2Mg1.ICSD.166234            | metal      | insulator |
| H2Mg2O3.ICSD.95472           | insulator  | insulator |
| H2Mg3O4.ICSD.95471           | insulator  | insulator |
| H2Mg4O5.ICSD.95470           | insulator  | insulator |

Supplementary Table 430. Five-fold cross validated predictions for the metal/insulator classification (422/598).

| system                  | calculated | predicted |
|-------------------------|------------|-----------|
| H2Mg5O6.ICSD.95469      | insulator  | insulator |
| H2Mn1O2.ICSD.23591      | insulator  | insulator |
| H2Mn1O5P1.ICSD.62220    | insulator  | insulator |
| H2Mn1O5S1.ICSD.71344    | metal      | insulator |
| H2Mn1O7P2.ICSD.419085   | insulator  | insulator |
| H2Mn1O8S2.ICSD.408752   | insulator  | insulator |
| H2Mn2O6S1.ICSD.413556   | insulator  | insulator |
| H2Mn3O10Se3.ICSD.281509 | insulator  | insulator |
| H2Mn6O17P4.ICSD.412152  | insulator  | insulator |
| H2N1Na1.ICSD.34290      | insulator  | insulator |
| H2N2Na2O4.ICSD.10182    | insulator  | insulator |
| H2N2O5Sr1.ICSD.38403    | insulator  | insulator |
| H2N2S6.ICSD.2535        | insulator  | insulator |
| H2Na2Pd1.ICSD.68071     | metal      | insulator |
| H2Na3O6Os1.ICSD.172060  | insulator  | insulator |
| H2Nb1.ICSD.56074        | metal      | metal     |
| H2Nd1Ni1Sn1.ICSD.157932 | metal      | metal     |
| H2Nd1.ICSD.56076        | metal      | metal     |
| H2Ni1O2.ICSD.169978     | insulator  | insulator |
| H2Ni1O5S1.ICSD.71347    | insulator  | insulator |
| H2Ni1O5Se1.ICSD.66748   | insulator  | insulator |
| H2Ni1Pr1Sn1.ICSD.157931 | metal      | metal     |
| H2O10P2Ti2.ICSD.160167  | insulator  | insulator |
| H2O13Ti6.ICSD.186994    | insulator  | insulator |
| H2O1.ICSD.27837         | insulator  | insulator |
| H2O1.ICSD.27844         | metal      | insulator |
| H2O1.ICSD.31683         | insulator  | insulator |
| H2O1.ICSD.64771         | insulator  | insulator |
| H2O2P1Rb1.ICSD.250131   | insulator  | insulator |
| H2O2Pb1.ICSD.20701      | insulator  | insulator |
| H2O2Zn1.ICSD.50447      | insulator  | insulator |
| H2O2.ICSD.34253         | insulator  | insulator |
| H2O3Se1.ICSD.31929      | insulator  | insulator |
| H2O4P1Rb1.ICSD.69317    | insulator  | insulator |
| H2O4P1Rb1.ICSD.69318    | insulator  | insulator |
| H2O4P1Ti1.ICSD.8051     | insulator  | insulator |
| H2O4P1Ti1.ICSD.81068    | insulator  | insulator |
| H2O4Pb3.ICSD.60054      | insulator  | insulator |
| H2O4S1.ICSD.38429       | insulator  | insulator |
| H2O4S1.ICSD.82732       | insulator  | insulator |
| H2O4S1.ICSD.95409       | insulator  | insulator |
| H2O4Se1.ICSD.60942      | insulator  | insulator |
| H2O4U1.ICSD.2867        | insulator  | insulator |
| H2O4U1.ICSD.9153        | insulator  | insulator |
| H2O5S1Zn1.ICSD.71348    | insulator  | insulator |
| H2O5Se1V1.ICSD.69994    | insulator  | insulator |
| H2O5Se1Zn1.ICSD.66749   | insulator  | insulator |
| H2O6P2Rb1V1.ICSD.423279 | insulator  | insulator |
| H2O6P2Zr1.ICSD.201970   | insulator  | insulator |
| H2O6P2Zr1.ICSD.74463    | insulator  | insulator |

Supplementary Table 431. Five-fold cross validated predictions for the metal/insulator classification (423/598).

| system                 | calculated | predicted |
|------------------------|------------|-----------|
| H2O6S1Ti1.ICSD.72973   | insulator  | insulator |
| H2O6Se2Sr1.ICSD.410935 | insulator  | insulator |
| H2O8Pb4S1.ICSD.84850   | insulator  | insulator |
| H2O8S2Zn1.ICSD.63418   | insulator  | insulator |
| H2O8Se2Zn1.ICSD.66967  | insulator  | insulator |
| H2Pd1Zr2.ICSD.638425   | metal      | metal     |
| H2Pr1.ICSD.56080       | metal      | metal     |
| H2Pu1.ICSD.638441      | metal      | metal     |
| H2S1.ICSD.168207       | insulator  | insulator |
| H2S1.ICSD.24582        | metal      | insulator |
| H2S1.ICSD.50333        | insulator  | insulator |
| H2Sc1.ICSD.638457      | metal      | metal     |
| H2Se1.ICSD.24584       | metal      | insulator |
| H2Sm1.ICSD.44878       | metal      | metal     |
| H2Sm1.ICSD.638466      | metal      | metal     |
| H2Sm1.ICSD.638472      | metal      | metal     |
| H2Sr1.ICSD.163569      | insulator  | insulator |
| H2Sr1.ICSD.163576      | insulator  | insulator |
| H2Ta1.ICSD.56172       | metal      | metal     |
| H2Tb1.ICSD.56175       | metal      | metal     |
| H2Th1.ICSD.180580      | metal      | metal     |
| H2Th1.ICSD.180581      | metal      | metal     |
| H2Ti1.ICSD.166235      | metal      | metal     |
| H2Ti1.ICSD.168834      | metal      | metal     |
| H2Ti1.ICSD.169605      | metal      | metal     |
| H2Tm1.ICSD.56187       | metal      | metal     |
| H2Tm1.ICSD.638513      | metal      | metal     |
| H2V1.ICSD.638528       | metal      | metal     |
| H2W1.ICSD.247593       | metal      | metal     |
| H2Y1.ICSD.638535       | metal      | metal     |
| H2Yb1.ICSD.56195       | metal      | metal     |
| H2Yb1.ICSD.638550      | metal      | metal     |
| H2Zr1.ICSD.56198       | metal      | metal     |
| H2Zr1.ICSD.638551      | metal      | metal     |
| H2.ICSD.28344          | insulator  | insulator |
| H2.ICSD.28465          | insulator  | insulator |
| H2.ICSD.28539          | insulator  | insulator |
| H2.ICSD.62003          | insulator  | insulator |
| H2.ICSD.67425          | insulator  | insulator |
| H3Ho1O3.ICSD.200096    | metal      | insulator |
| H3Ho1.ICSD.638194      | insulator  | metal     |
| H3I1Li1N1.ICSD.55064   | insulator  | insulator |
| H3I1Si1.ICSD.65044     | insulator  | insulator |
| H3I1Sr2.ICSD.422181    | insulator  | insulator |
| H3I3N2.ICSD.27416      | insulator  | insulator |
| H3K1Li2O3.ICSD.65148   | insulator  | insulator |
| H3K1Mg1.ICSD.181940    | metal      | insulator |
| H3K1Mg1.ICSD.638209    | insulator  | insulator |
| H3K1N1O3P1.ICSD.23291  | insulator  | insulator |
| H3K1O2.ICSD.47114      | insulator  | insulator |

Supplementary Table 432. Five-fold cross validated predictions for the metal/insulator classification (424/598).

| system                      | calculated | predicted |
|-----------------------------|------------|-----------|
| H3K1O6Se2.ICSD.2838         | insulator  | insulator |
| H3K1Si1.ICSD.65954          | insulator  | insulator |
| H3La1O12Se3.ICSD.411831     | insulator  | insulator |
| H3La1O3.ICSD.167480         | insulator  | insulator |
| H3La1.ICSD.638226           | metal      | metal     |
| H3Li1Mg1.ICSD.181326        | insulator  | insulator |
| H3Li1O2.ICSD.9138           | insulator  | insulator |
| H3Li1O6Se2.ICSD.8243        | insulator  | insulator |
| H3Li1Sr1.ICSD.23978         | insulator  | insulator |
| H3Li4Mg1N3.ICSD.165891      | insulator  | insulator |
| H3Mg1Na1.ICSD.159174        | insulator  | insulator |
| H3Mg1Ni1.ICSD.187259        | metal      | metal     |
| H3N1Na1O3P1.ICSD.16608      | insulator  | insulator |
| H3N1O3S1.ICSD.802           | insulator  | insulator |
| H3N1O6Sr2.ICSD.415799       | insulator  | insulator |
| H3N1.ICSD.84461             | insulator  | insulator |
| H3N3Pb1S2.ICSD.49538        | insulator  | insulator |
| H3Na1O2.ICSD.33909          | insulator  | insulator |
| H3Na1O5S1.ICSD.28259        | insulator  | insulator |
| H3Na1O6Se2.ICSD.34523       | metal      | insulator |
| H3Na1O6Si2.ICSD.39749       | insulator  | insulator |
| H3Na1O8S2Zn2.ICSD.61213     | insulator  | insulator |
| H3Nd1O3.ICSD.167482         | metal      | insulator |
| H3Ni1Yb1.ICSD.638405        | metal      | metal     |
| H3Ni1Zr1.ICSD.638406        | metal      | metal     |
| H3O2Rb1.ICSD.47115          | insulator  | insulator |
| H3O3P1.ICSD.33790           | insulator  | insulator |
| H3O3Tb1.ICSD.1224           | insulator  | insulator |
| H3O3Y1.ICSD.200098          | insulator  | insulator |
| H3O4P1Sr1.ICSD.411738       | insulator  | insulator |
| H3O4P1.ICSD.15887           | insulator  | insulator |
| H3O9P3Sb2.ICSD.26555        | insulator  | insulator |
| H3O9P3Sc2.ICSD.409724       | insulator  | insulator |
| H3P1.ICSD.24498             | metal      | insulator |
| H3Pa1.ICSD.76030            | metal      | metal     |
| H3Pd1Ti2.ICSD.167659        | metal      | metal     |
| H3Pd1Yb1.ICSD.638422        | metal      | metal     |
| H3Pd1Zr2.ICSD.601955        | metal      | metal     |
| H3Pu1.ICSD.638440           | metal      | metal     |
| H3Tb1.ICSD.638485           | insulator  | metal     |
| H3U1.ICSD.44994             | metal      | metal     |
| H3U1.ICSD.60546             | metal      | metal     |
| H3W1.ICSD.247598            | metal      | metal     |
| H3Y1.ICSD.154809            | insulator  | metal     |
| H3Y1.ICSD.180317            | metal      | metal     |
| H3Y1.ICSD.41548             | metal      | metal     |
| H3Yb1.ICSD.56196            | metal      | metal     |
| H4.001N1.667Rb1.ICSD.418413 | insulator  | insulator |
| H4Hg2O9P2.ICSD.413085       | insulator  | insulator |
| H4I1N1O4.ICSD.280083        | insulator  | insulator |

Supplementary Table 433. Five-fold cross validated predictions for the metal/insulator classification (425/598).

| system                    | calculated | predicted |
|---------------------------|------------|-----------|
| H4I1Na1O2.ICSD.23134      | insulator  | insulator |
| H4I1P1.ICSD.22083         | insulator  | insulator |
| H4I2O8Zn1.ICSD.410881     | insulator  | insulator |
| H4I3N1Pb1.ICSD.240915     | insulator  | insulator |
| H4I3N1.ICSD.48202         | insulator  | insulator |
| H4I3O11Yb1.ICSD.413352    | insulator  | insulator |
| H4I4K2O14Zn1.ICSD.260726  | insulator  | insulator |
| H4K2Mg1.ICSD.68358        | insulator  | insulator |
| H4K2Mn3O12P4.ICSD.260451  | insulator  | insulator |
| H4K2N4O10Pd1.ICSD.164218  | metal      | insulator |
| H4K2O6Os1.ICSD.409612     | insulator  | insulator |
| H4K2Zn1.ICSD.187277       | insulator  | insulator |
| H4La1N1O8S2.ICSD.20895    | insulator  | insulator |
| H4Li2Mg1.ICSD.181325      | insulator  | insulator |
| H4Li4Rh1.ICSD.26226       | metal      | metal     |
| H4Mg1Na2O8S2.ICSD.35767   | insulator  | insulator |
| H4Mg1Ni4Y1.ICSD.169537    | metal      | metal     |
| H4Mg2Ni1.ICSD.162413      | insulator  | insulator |
| H4Mg3O5.ICSD.95473        | insulator  | insulator |
| H4Mg3O9Si2.ICSD.75933     | insulator  | insulator |
| H4N1O3V1.ICSD.164689      | insulator  | insulator |
| H4N1O4Re1.ICSD.1394       | insulator  | insulator |
| H4N1O4Tc1.ICSD.10427      | insulator  | insulator |
| H4N2Ni1.ICSD.69723        | insulator  | insulator |
| H4N2O2S1.ICSD.62521       | metal      | insulator |
| H4N2O3.ICSD.27453         | insulator  | insulator |
| H4N2O3.ICSD.2772          | insulator  | insulator |
| H4N2O3.ICSD.37128         | insulator  | insulator |
| H4N2O8Zn1.ICSD.9286       | insulator  | insulator |
| H4N4S4.ICSD.15394         | insulator  | insulator |
| H4N4.ICSD.2236            | insulator  | insulator |
| H4Na2O10Se2Zn1.ICSD.98685 | insulator  | insulator |
| H4Na2O5Ti1.ICSD.183668    | insulator  | insulator |
| H4Na2O8S4.ICSD.40833      | insulator  | insulator |
| H4Na2O8Se2.ICSD.71786     | insulator  | insulator |
| H4Na2Pt1.ICSD.638356      | insulator  | insulator |
| H4Na6O18S4Zn1.ICSD.61246  | insulator  | insulator |
| H4Ni2O10P2Sr1.ICSD.261127 | insulator  | insulator |
| H4O10Si2Zn4.ICSD.422820   | insulator  | insulator |
| H4O10V4.ICSD.260368       | insulator  | insulator |
| H4O11P2Ti2.ICSD.84307     | insulator  | insulator |
| H4O12S3Sr1.ICSD.404139    | insulator  | insulator |
| H4O3Sr1.ICSD.63016        | insulator  | insulator |
| H4O4P2Pb1.ICSD.59933      | insulator  | insulator |
| H4O4P2Sr1.ICSD.59932      | insulator  | insulator |
| H4O4P2Zn1.ICSD.66911      | insulator  | insulator |
| H4O4V2.ICSD.41123         | insulator  | insulator |
| H4O6P2Sr1.ICSD.412173     | insulator  | insulator |
| H4O8P2Pb1.ICSD.86778      | insulator  | insulator |
| H4O9P2V1.ICSD.20182       | insulator  | insulator |

Supplementary Table 434. Five-fold cross validated predictions for the metal/insulator classification (426/598).

| system                   | calculated | predicted |
|--------------------------|------------|-----------|
| H4Pd1Ti2.ICSD.167660     | metal      | metal     |
| H4S6Si4.ICSD.36379       | insulator  | insulator |
| H4Si1.ICSD.159307        | insulator  | insulator |
| H4Sn1.ICSD.168178        | metal      | metal     |
| H4Sn1.ICSD.168179        | metal      | metal     |
| H4Sn1.ICSD.168180        | metal      | metal     |
| H4Sn1.ICSD.168181        | metal      | metal     |
| H5I1O6.ICSD.25790        | insulator  | insulator |
| H5K1O8P2.ICSD.23097      | insulator  | insulator |
| H5K2O6Sb1.ICSD.422765    | insulator  | insulator |
| H5K3O14P4.ICSD.30511     | insulator  | insulator |
| H5K3Zn1.ICSD.187417      | insulator  | insulator |
| H5Li1N2O4S1.ICSD.2051    | insulator  | insulator |
| H5Li4Rh1.ICSD.26225      | metal      | insulator |
| H5N1O3Se1.ICSD.171372    | insulator  | insulator |
| H5Na3O16Se4.ICSD.411720  | insulator  | insulator |
| H5Nd2.ICSD.638383        | metal      | metal     |
| H5O8P2Rb1.ICSD.20915     | insulator  | insulator |
| H5O8P2Ti1.ICSD.30509     | insulator  | insulator |
| H5Rb3Zn1.ICSD.187418     | insulator  | insulator |
| H5W1.ICSD.247606         | metal      | metal     |
| H5W1.ICSD.247609         | metal      | metal     |
| H6Hf1Na2O6.ICSD.88890    | insulator  | insulator |
| H6Hf1O10P2.ICSD.94481    | insulator  | insulator |
| H6Hg1I3N1O1.ICSD.409701  | insulator  | insulator |
| H6Ir1Li1Mg1.ICSD.180122  | insulator  | insulator |
| H6Ir1Na3.ICSD.40575      | insulator  | insulator |
| H6K2O6Pb1.ICSD.92466     | insulator  | insulator |
| H6K2O6Sn1.ICSD.92465     | insulator  | insulator |
| H6La1O12P3.ICSD.240963   | insulator  | insulator |
| H6Li1Mn1O7.ICSD.33776    | insulator  | insulator |
| H6Li1N1O6.ICSD.48040     | insulator  | insulator |
| H6Li2N3Rb1.ICSD.56394    | insulator  | insulator |
| H6Li2Pt1.ICSD.236283     | insulator  | insulator |
| H6Li4Ru1.ICSD.638272     | insulator  | insulator |
| H6Mg1O6Si1.ICSD.185677   | insulator  | insulator |
| H6Mg2Na2Ni1.ICSD.260394  | insulator  | insulator |
| H6N1Nd1O10S1.ICSD.416245 | insulator  | insulator |
| H6N1Ni1O5P1.ICSD.424553  | insulator  | insulator |
| H6N1O2P1.ICSD.250178     | insulator  | insulator |
| H6N1O4P1.ICSD.246299     | insulator  | insulator |
| H6N1O4P1.ICSD.29257      | insulator  | insulator |
| H6N2O4S1.ICSD.16055      | insulator  | insulator |
| H6N2O4S1.ICSD.1977       | insulator  | insulator |
| H6N3O12Ti1.ICSD.1723     | insulator  | insulator |
| H6N3O1P1.ICSD.16151      | insulator  | insulator |
| H6N4O4Pd1.ICSD.420291    | insulator  | insulator |
| H6N4O4Pt1.ICSD.420292    | insulator  | insulator |
| H6Na1O6P1.ICSD.66        | insulator  | insulator |
| H6Na2O6Sn1.ICSD.92464    | insulator  | insulator |

Supplementary Table 435. Five-fold cross validated predictions for the metal/insulator classification (427/598).

| system                    | calculated | predicted |
|---------------------------|------------|-----------|
| H6Na2Pt1.ICSD.236284      | insulator  | insulator |
| H6Na4Ru1.ICSD.638362      | insulator  | insulator |
| H6Nd1O12P3.ICSD.426743    | insulator  | insulator |
| H6O10P2Zr1.ICSD.94480     | insulator  | insulator |
| H6O12P3Pr1.ICSD.155271    | insulator  | insulator |
| H6O12P3Sc1.ICSD.20432     | insulator  | insulator |
| H6O12Sc2Se3.ICSD.391277   | insulator  | insulator |
| H6O1Si2.ICSD.30501        | insulator  | insulator |
| H6O5Sr1Zn1.ICSD.50177     | insulator  | insulator |
| H6O8Se2Zn1.ICSD.200525    | insulator  | insulator |
| H6Os1Sr2.ICSD.638409      | insulator  | insulator |
| H6Ru1Sr2.ICSD.655142      | insulator  | insulator |
| H6W1.ICSD.247611          | metal      | metal     |
| H7La1Ni5.ICSD.96245       | metal      | metal     |
| H7La1Ni5.ICSD.96246       | metal      | metal     |
| H7La2O11P3.ICSD.249116    | insulator  | insulator |
| H7Mg3Tc1.ICSD.262724      | insulator  | insulator |
| H7N1O6.ICSD.1902          | insulator  | insulator |
| H7N2O4P1.ICSD.15083       | insulator  | insulator |
| H7Na5O18Se4.ICSD.40276    | insulator  | insulator |
| H7Th1Zr2.ICSD.56180       | metal      | metal     |
| H8I1N4P1.ICSD.400461      | insulator  | insulator |
| H8I1N4P1.ICSD.74814       | insulator  | insulator |
| H8K1N3.ICSD.414496        | insulator  | insulator |
| H8K1N4Y1.ICSD.202010      | insulator  | insulator |
| H8K2Ni1O16P4.ICSD.281592  | insulator  | insulator |
| H8K2O14V2.ICSD.67322      | insulator  | insulator |
| H8K2O16P4Zn1.ICSD.281290  | insulator  | insulator |
| H8K4O4P2Se6.ICSD.260476   | insulator  | insulator |
| H8La1O7P3.ICSD.88015      | insulator  | insulator |
| H8Mg1O14V4.ICSD.185911    | insulator  | insulator |
| H8Mg5O9.ICSD.95474        | insulator  | insulator |
| H8Mn1O16P4Ti2.ICSD.416649 | insulator  | insulator |
| H8Mo1N2O2S2.ICSD.41688    | insulator  | insulator |
| H8N10Zn1.ICSD.421952      | insulator  | insulator |
| H8N2O4S1.ICSD.34258       | insulator  | insulator |
| H8N2O4Se1.ICSD.838        | insulator  | insulator |
| H8N2S5.ICSD.30984         | insulator  | insulator |
| H8N8Na1O12Rh1.ICSD.169810 | insulator  | insulator |
| H8Ni1O10P2.ICSD.417429    | metal      | insulator |
| H8Ni1O12Re2.ICSD.402773   | insulator  | insulator |
| H8Ni1O16P4Ti2.ICSD.416651 | insulator  | insulator |
| H8O10P2Zn1.ICSD.417431    | insulator  | insulator |
| H8O12Si8.ICSD.75244       | insulator  | insulator |
| H8O16P4Ti2Zn1.ICSD.416652 | insulator  | insulator |
| H8O8Sn1Sr2.ICSD.91102     | insulator  | insulator |
| H8O8U1.ICSD.167992        | insulator  | insulator |
| H8Si1.ICSD.169739         | insulator  | insulator |
| H8Si1.ICSD.169740         | insulator  | insulator |
| H9.975La3.99.ICSD.638228  | metal      | metal     |

Supplementary Table 436. Five-fold cross validated predictions for the metal/insulator classification (428/598).

| system                   | calculated | predicted |
|--------------------------|------------|-----------|
| H9K1O5.ICSD_36598        | insulator  | insulator |
| H9K2Re1.ICSD_27563       | insulator  | insulator |
| H9N1Si3.ICSD_201428      | insulator  | insulator |
| H9N2O4P1.ICSD_2799       | insulator  | insulator |
| He1.ICSD_22384           | insulator  | insulator |
| He1.ICSD_426943          | insulator  | insulator |
| He1.ICSD_44394           | insulator  | insulator |
| He1.ICSD_44395           | insulator  | insulator |
| He2Ne1.ICSD_659143       | insulator  | insulator |
| Hf0.17Re0.83.ICSD_638804 | metal      | metal     |
| Hf1.5Mn1.5.ICSD_638599   | metal      | metal     |
| Hf10Mo3Si1.ICSD_603654   | metal      | metal     |
| Hf1I1N1.ICSD_51774       | insulator  | insulator |
| Hf1I3.ICSD_23947         | metal      | insulator |
| Hf1I4.ICSD_109275        | insulator  | insulator |
| Hf1I4.ICSD_200826        | insulator  | insulator |
| Hf1I4.ICSD_62473         | insulator  | insulator |
| Hf1In1Ni2.ICSD_54595     | metal      | metal     |
| Hf1Ir1Si1.ICSD_638584    | metal      | metal     |
| Hf1Ir1Sn1.ICSD_638586    | metal      | metal     |
| Hf1Ir1.ICSD_185632       | metal      | metal     |
| Hf1Ir1.ICSD_185634       | metal      | metal     |
| Hf1Ir3.ICSD_185651       | metal      | metal     |
| Hf1La3Sb5.ICSD_83906     | metal      | metal     |
| Hf1Mn1Si1.ICSD_53024     | metal      | metal     |
| Hf1Mn2.ICSD_104214       | metal      | metal     |
| Hf1Mn6Sn6.ICSD_54930     | metal      | metal     |
| Hf1Mo1P1.ICSD_88151      | metal      | metal     |
| Hf1Mo1Si1.ICSD_638634    | metal      | metal     |
| Hf1Mo2O8.ICSD_98065      | insulator  | insulator |
| Hf1Mo2.ICSD_638610       | metal      | metal     |
| Hf1Mo2.ICSD_638621       | metal      | metal     |
| Hf1N1O3Ta1.ICSD_186407   | insulator  | insulator |
| Hf1N1O3Ta1.ICSD_186408   | insulator  | insulator |
| Hf1N1O3Ta1.ICSD_186409   | insulator  | insulator |
| Hf1N1.ICSD_167875        | metal      | metal     |
| Hf1N1.ICSD_183420        | metal      | metal     |
| Hf1N1.ICSD_638649        | metal      | metal     |
| Hf1N2Sr1.ICSD_82538      | insulator  | insulator |
| Hf1N2.ICSD_290427        | metal      | insulator |
| Hf1N2.ICSD_290428        | insulator  | metal     |
| Hf1N2.ICSD_290429        | insulator  | insulator |
| Hf1N3Ta2.ICSD_186423     | metal      | metal     |
| Hf1Nb1P1.ICSD_75009      | metal      | metal     |
| Hf1Ni1P1.ICSD_638712     | metal      | metal     |
| Hf1Ni1Si1.ICSD_638723    | metal      | metal     |
| Hf1Ni1Sn1.ICSD_638731    | insulator  | metal     |
| Hf1Ni1.ICSD_638689       | metal      | metal     |
| Hf1Ni2Sb1.ICSD_638718    | metal      | metal     |
| Hf1Ni2Si2.ICSD_638721    | metal      | metal     |

Supplementary Table 437. Five-fold cross validated predictions for the metal/insulator classification (429/598).

| system                 | calculated | predicted |
|------------------------|------------|-----------|
| Hf1Ni2Sn1.ICSD_104250  | metal      | metal     |
| Hf1Ni2.ICSD_104231     | metal      | metal     |
| Hf1Ni3.ICSD_2414       | metal      | metal     |
| Hf1Ni3.ICSD_2415       | metal      | metal     |
| Hf1Ni4P2.ICSD_638711   | metal      | metal     |
| Hf1Ni5.ICSD_150940     | metal      | metal     |
| Hf1O0.1667.ICSD_174039 | metal      | metal     |
| Hf1O1S1.ICSD_23327     | insulator  | insulator |
| Hf1O2.ICSD_173965      | insulator  | insulator |
| Hf1O2.ICSD_173966      | insulator  | insulator |
| Hf1O2.ICSD_173968      | insulator  | insulator |
| Hf1O2.ICSD_180834      | insulator  | insulator |
| Hf1O2.ICSD_187015      | insulator  | insulator |
| Hf1O2.ICSD_83863       | insulator  | insulator |
| Hf1O3Pb1.ICSD_161702   | insulator  | insulator |
| Hf1O3Pb1.ICSD_174110   | insulator  | insulator |
| Hf1O3Pb1.ICSD_33194    | insulator  | insulator |
| Hf1O3Sr1.ICSD_161594   | insulator  | insulator |
| Hf1O3Sr1.ICSD_161595   | insulator  | insulator |
| Hf1O3Sr1.ICSD_161597   | insulator  | insulator |
| Hf1O3Sr1.ICSD_161598   | insulator  | insulator |
| Hf1O3Sr1.ICSD_164620   | insulator  | insulator |
| Hf1O3Sr1.ICSD_164622   | insulator  | insulator |
| Hf1O3Sr1.ICSD_84280    | insulator  | insulator |
| Hf1O4Si1.ICSD_187732   | insulator  | insulator |
| Hf1O7V2.ICSD_90134     | insulator  | insulator |
| Hf1O8Te3.ICSD_9078     | insulator  | insulator |
| Hf1O8W2.ICSD_188441    | insulator  | insulator |
| Hf1Os1P1.ICSD_638751   | metal      | metal     |
| Hf1Os1Si1.ICSD_638752  | metal      | metal     |
| Hf1Os1Si1.ICSD_638753  | metal      | metal     |
| Hf1Os1.ICSD_104252     | metal      | metal     |
| Hf1Os2.ICSD_150513     | metal      | metal     |
| Hf1Os3.ICSD_185650     | metal      | metal     |
| Hf1P1Ru1.ICSD_53035    | metal      | metal     |
| Hf1P1V1.ICSD_656389    | metal      | metal     |
| Hf1P1.ICSD_42914       | metal      | metal     |
| Hf1P2S6.ICSD_47228     | insulator  | insulator |
| Hf1P2.ICSD_638760      | metal      | metal     |
| Hf1Pb1S3.ICSD_65668    | insulator  | insulator |
| Hf1Pd1Si1.ICSD_90279   | metal      | metal     |
| Hf1Pd1Sn1.ICSD_106773  | insulator  | insulator |
| Hf1Pd1.ICSD_185630     | metal      | metal     |
| Hf1Pd1.ICSD_185631     | metal      | metal     |
| Hf1Pd3.ICSD_104254     | metal      | metal     |
| Hf1Pd3.ICSD_185649     | metal      | metal     |
| Hf1Pd5.ICSD_168289     | metal      | metal     |
| Hf1Pt1Si1.ICSD_638791  | metal      | metal     |
| Hf1Pt1Sn1.ICSD_104261  | metal      | metal     |
| Hf1Pt1.ICSD_104257     | metal      | metal     |

Supplementary Table 438. Five-fold cross validated predictions for the metal/insulator classification (430/598).

| system                | calculated | predicted |
|-----------------------|------------|-----------|
| Hf1Pt1_ICSD_638781    | metal      | metal     |
| Hf1Pt3_ICSD_185652    | metal      | metal     |
| Hf1Pt3_ICSD_638782    | metal      | metal     |
| Hf1Re1Si1_ICSD_638814 | metal      | metal     |
| Hf1Re2_ICSD_638810    | metal      | metal     |
| Hf1Rh1Sb1_ICSD_53036  | metal      | metal     |
| Hf1Rh1Si1_ICSD_638834 | metal      | metal     |
| Hf1Rh1Sn1_ICSD_107474 | metal      | metal     |
| Hf1Rh1Sn1_ICSD_638836 | metal      | metal     |
| Hf1Rh1_ICSD_104265    | metal      | metal     |
| Hf1Rh3_ICSD_104266    | metal      | metal     |
| Hf1Ru1Sb1_ICSD_107125 | metal      | metal     |
| Hf1Ru1Si1_ICSD_638841 | metal      | metal     |
| Hf1Ru1_ICSD_104268    | metal      | metal     |
| Hf1Ru3_ICSD_185647    | metal      | metal     |
| Hf1S1Si1_ICSD_25735   | metal      | metal     |
| Hf1S2_ICSD_182677     | insulator  | insulator |
| Hf1S3Sn1_ICSD_65667   | insulator  | insulator |
| Hf1S3_ICSD_638846     | insulator  | insulator |
| Hf1S4Ti4_ICSD_261210  | insulator  | insulator |
| Hf1S5Y2_ICSD_185      | insulator  | insulator |
| Hf1Sb1_ICSD_107591    | metal      | metal     |
| Hf1Sb2_ICSD_638876    | metal      | metal     |
| Hf1Sb2_ICSD_66780     | metal      | metal     |
| Hf1Sb5U3_ICSD_154389  | metal      | metal     |
| Hf1Se1Si1_ICSD_25736  | metal      | metal     |
| Hf1Se2_ICSD_182678    | insulator  | metal     |
| Hf1Se3Ti2_ICSD_186071 | insulator  | insulator |
| Hf1Se3_ICSD_638898    | insulator  | insulator |
| Hf1Si1Te1_ICSD_25737  | metal      | metal     |
| Hf1Si1V1_ICSD_638931  | metal      | metal     |
| Hf1Si1_ICSD_638911    | metal      | metal     |
| Hf1Si2_ICSD_638923    | metal      | metal     |
| Hf1Sn1_ICSD_104272    | metal      | metal     |
| Hf1Sn2_ICSD_638941    | metal      | metal     |
| Hf1Sn2_ICSD_638946    | metal      | metal     |
| Hf1Tc1_ICSD_104277    | metal      | metal     |
| Hf1Tc2_ICSD_638956    | metal      | metal     |
| Hf1Te2_ICSD_638959    | metal      | metal     |
| Hf1Te3_ICSD_638962    | metal      | metal     |
| Hf1Te4Ti4_ICSD_168651 | insulator  | insulator |
| Hf1Te5_ICSD_657474    | metal      | metal     |
| Hf1V2_ICSD_187951     | metal      | metal     |
| Hf1V2_ICSD_187953     | metal      | metal     |
| Hf1V2_ICSD_280388     | metal      | metal     |
| Hf1W2_ICSD_639010     | metal      | metal     |
| Hf1Zn22_ICSD_639015   | metal      | metal     |
| Hf1Zn2_ICSD_104292    | metal      | metal     |
| Hf1Zn2_ICSD_639018    | metal      | metal     |
| Hf1_ICSD_187430       | metal      | metal     |

Supplementary Table 439. Five-fold cross validated predictions for the metal/insulator classification (431/598).

| system                | calculated | predicted |
|-----------------------|------------|-----------|
| Hf1_ICSD_41519        | metal      | metal     |
| Hf1_ICSD_53022        | metal      | metal     |
| Hf1_ICSD_76412        | metal      | metal     |
| Hf2Hg1_ICSD_638564    | metal      | metal     |
| Hf2Ho2O7_ICSD_162005  | insulator  | insulator |
| Hf2In5_ICSD_404531    | metal      | metal     |
| Hf2Ir1_ICSD_638574    | metal      | metal     |
| Hf2La2O7_ICSD_153815  | insulator  | insulator |
| Hf2La2O7_ICSD_173790  | metal      | insulator |
| Hf2Mn1_ICSD_638594    | metal      | metal     |
| Hf2N3Ta1_ICSD_186420  | metal      | metal     |
| Hf2Nd2O7_ICSD_236210  | insulator  | insulator |
| Hf2Ni1P1_ICSD_405616  | metal      | metal     |
| Hf2Ni1_ICSD_102808    | metal      | metal     |
| Hf2Ni2Sn1_ICSD_107096 | metal      | metal     |
| Hf2Ni2Sn1_ICSD_407546 | metal      | metal     |
| Hf2Ni3Si4_ICSD_40442  | metal      | metal     |
| Hf2O7Y2_ICSD_153819   | insulator  | insulator |
| Hf2O9P2_ICSD_416013   | insulator  | insulator |
| Hf2Os1_ICSD_638748    | metal      | metal     |
| Hf2P1Sb1_ICSD_638764  | metal      | metal     |
| Hf2P1_ICSD_24350      | metal      | metal     |
| Hf2Pd1_ICSD_104255    | metal      | metal     |
| Hf2Pd1_ICSD_638772    | metal      | metal     |
| Hf2Pt1_ICSD_638787    | metal      | metal     |
| Hf2Rh1_ICSD_638817    | metal      | metal     |
| Hf2S1_ICSD_43203      | metal      | metal     |
| Hf2Si1_ICSD_638912    | metal      | metal     |
| Hf2Te1_ICSD_83965     | metal      | metal     |
| Hf2Ti1_ICSD_168287    | metal      | metal     |
| Hf2Ti1_ICSD_168954    | metal      | metal     |
| Hf2Zn1_ICSD_639016    | metal      | metal     |
| Hf3In4_ICSD_638568    | metal      | metal     |
| Hf3N1Zn3_ICSD_42937   | metal      | metal     |
| Hf3N4_ICSD_97997      | insulator  | metal     |
| Hf3Ni2Si3_ICSD_200067 | metal      | metal     |
| Hf3Ni7_ICSD_2417      | metal      | metal     |
| Hf3P1_ICSD_35439      | metal      | metal     |
| Hf3P2_ICSD_36117      | metal      | metal     |
| Hf3P3Pd4_ICSD_280272  | metal      | metal     |
| Hf3Rh5_ICSD_104267    | metal      | metal     |
| Hf3Sb1_ICSD_638878    | metal      | metal     |
| Hf3Sc1_ICSD_168284    | metal      | metal     |
| Hf3Si2_ICSD_638925    | metal      | metal     |
| Hf3Te2_ICSD_75936     | metal      | metal     |
| Hf4Ni1P1_ICSD_638708  | metal      | metal     |
| Hf5In4Rh2_ICSD_412706 | metal      | metal     |
| Hf5Ir3_ICSD_638575    | metal      | metal     |
| Hf5Ir3_ICSD_638578    | metal      | metal     |
| Hf5K4O12_ICSD_180186  | insulator  | insulator |

Supplementary Table 440. Five-fold cross validated predictions for the metal/insulator classification (432/598).

| system                 | calculated | predicted |
|------------------------|------------|-----------|
| Hf5Ni1Sn3.ICSD_638730  | metal      | metal     |
| Hf5Pb1.ICSD_168288     | metal      | metal     |
| Hf5Sb3Zn1.ICSD_42913   | metal      | metal     |
| Hf5Sb3.ICSD_410750     | metal      | metal     |
| Hf5Sb9.ICSD_413979     | metal      | metal     |
| Hf5Sc1.ICSD_168285     | metal      | metal     |
| Hf5Si3.ICSD_638909     | metal      | metal     |
| Hf5Si4.ICSD_638914     | metal      | metal     |
| Hf5Sn3.ICSD_183487     | metal      | metal     |
| Hf5Sn4.ICSD_107313     | metal      | metal     |
| Hf5Te4.ICSD_154358     | metal      | metal     |
| Hf6Ni16Si7.ICSD_109223 | metal      | metal     |
| Hf6Ni1Sb2.ICSD_85966   | metal      | metal     |
| Hf7Ni10.ICSD_638690    | metal      | metal     |
| Hf7P4.ICSD_405208      | metal      | metal     |
| Hf8Ni21.ICSD_2416      | metal      | metal     |
| Hf9Mo4Ni1.ICSD_638623  | metal      | metal     |
| Hf9Mo4P1.ICSD_638625   | metal      | metal     |
| Hf9Mo4S1.ICSD_638628   | metal      | metal     |
| Hf9Mo4Se1.ICSD_638630  | metal      | metal     |
| Hf9Mo4Si1.ICSD_260996  | metal      | metal     |
| Hf9Ni11.ICSD_638706    | metal      | metal     |
| Hf9Ni1Re4.ICSD_638713  | metal      | metal     |
| Hf9Ni1W4.ICSD_638734   | metal      | metal     |
| Hf9P1Re4.ICSD_638761   | metal      | metal     |
| Hf9P1W4.ICSD_638765    | metal      | metal     |
| Hf9Re4S1.ICSD_638811   | metal      | metal     |
| Hf9Re4Se1.ICSD_638812  | metal      | metal     |
| Hf9Re4Si1.ICSD_638813  | metal      | metal     |
| Hf9S1V4.ICSD_81822     | metal      | metal     |
| Hf9S1W4.ICSD_638867    | metal      | metal     |
| Hf9Se1W4.ICSD_638906   | metal      | metal     |
| Hg11K1.ICSD_410566     | metal      | metal     |
| Hg11K3.ICSD_240039     | metal      | metal     |
| Hg11Rb1.ICSD_410567    | metal      | metal     |
| Hg11Sr1.ICSD_247134    | metal      | metal     |
| Hg19Rb5.ICSD_107452    | metal      | metal     |
| Hg1Ho1.ICSD_104297     | metal      | metal     |
| Hg1Ho2O4.ICSD_69734    | insulator  | insulator |
| Hg1I1N1O3.ICSD_32580   | insulator  | insulator |
| Hg1I2O6.ICSD_98546     | insulator  | insulator |
| Hg1I2.ICSD_281133      | insulator  | insulator |
| Hg1I2.ICSD_412988      | insulator  | insulator |
| Hg1I2.ICSD_67069       | insulator  | insulator |
| Hg1I6Ti4.ICSD_14018    | insulator  | insulator |
| Hg1I6Ti4.ICSD_250133   | insulator  | insulator |
| Hg1In1.ICSD_104299     | metal      | metal     |
| Hg1In2S4.ICSD_56081    | insulator  | insulator |
| Hg1In2Se4.ICSD_25649   | insulator  | insulator |
| Hg1In2Te4.ICSD_639056  | insulator  | insulator |

Supplementary Table 441. Five-fold cross validated predictions for the metal/insulator classification (433/598).

| system                  | calculated | predicted |
|-------------------------|------------|-----------|
| Hg1K1Sb1.ICSD_56201     | metal      | metal     |
| Hg1K1.ICSD_104302       | metal      | metal     |
| Hg1K2O2.ICSD_66275      | insulator  | insulator |
| Hg1K2S2.ICSD_74500      | insulator  | insulator |
| Hg1K2Se4Sn1.ICSD_413308 | insulator  | insulator |
| Hg1K4P2.ICSD_67263      | insulator  | insulator |
| Hg1K6S4.ICSD_266        | insulator  | insulator |
| Hg1K6Se4.ICSD_639060    | insulator  | insulator |
| Hg1La1Pd1.ICSD_657950   | metal      | metal     |
| Hg1La1.ICSD_639065      | metal      | metal     |
| Hg1Li1.ICSD_639075      | metal      | metal     |
| Hg1Li3.ICSD_104309      | metal      | metal     |
| Hg1Lu1.ICSD_639078      | metal      | metal     |
| Hg1Mg1.ICSD_104314      | metal      | metal     |
| Hg1Mg2.ICSD_104315      | metal      | metal     |
| Hg1Mg3.ICSD_639092      | metal      | metal     |
| Hg1Mn1.ICSD_639098      | metal      | metal     |
| Hg1Mo1O4.ICSD_2533      | insulator  | insulator |
| Hg1Mo6S8.ICSD_639106    | metal      | metal     |
| Hg1N3O6Rb1.ICSD_28644   | metal      | insulator |
| Hg1N3O6Ti1.ICSD_28646   | insulator  | metal     |
| Hg1N6.ICSD_21029        | insulator  | insulator |
| Hg1Na1O4P1.ICSD_32511   | insulator  | insulator |
| Hg1Na1.ICSD_104326      | metal      | metal     |
| Hg1Na2O2.ICSD_27409     | insulator  | insulator |
| Hg1Na2Pb1.ICSD_261791   | metal      | metal     |
| Hg1Na2S2.ICSD_74499     | insulator  | insulator |
| Hg1Na3.ICSD_408694      | metal      | metal     |
| Hg1Na4P2.ICSD_67260     | insulator  | insulator |
| Hg1Nd1.ICSD_104330      | metal      | metal     |
| Hg1Nd2O4.ICSD_41121     | metal      | insulator |
| Hg1Ni1.ICSD_100029      | metal      | metal     |
| Hg1O14P4V2.ICSD_78510   | insulator  | insulator |
| Hg1O1.ICSD_16627        | metal      | metal     |
| Hg1O1.ICSD_24062        | insulator  | insulator |
| Hg1O1.ICSD_32561        | insulator  | insulator |
| Hg1O1.ICSD_40316        | insulator  | insulator |
| Hg1O1.ICSD_639125       | insulator  | insulator |
| Hg1O2Rb2.ICSD_25514     | insulator  | insulator |
| Hg1O2Sr1.ICSD_165068    | insulator  | insulator |
| Hg1O2Sr1.ICSD_69739     | insulator  | insulator |
| Hg1O2.ICSD_24774        | insulator  | insulator |
| Hg1O2.ICSD_655816       | insulator  | insulator |
| Hg1O3Se1.ICSD_412547    | insulator  | insulator |
| Hg1O3Se1.ICSD_79694     | insulator  | insulator |
| Hg1O3Sn1.ICSD_260029    | metal      | insulator |
| Hg1O3Te1.ICSD_61673     | insulator  | insulator |
| Hg1O3Ti1.ICSD_19005     | insulator  | insulator |
| Hg1O3V1.ICSD_82242      | insulator  | insulator |
| Hg1O4Re1.ICSD_74885     | insulator  | insulator |

Supplementary Table 442. Five-fold cross validated predictions for the metal/insulator classification (434/598).

| system                   | calculated | predicted |
|--------------------------|------------|-----------|
| Hg1O4S1_ICSD_28402       | insulator  | insulator |
| Hg1O4S1_ICSD_31870       | insulator  | insulator |
| Hg1O4Se1_ICSD_412403     | insulator  | insulator |
| Hg1O4W1_ICSD_169667      | insulator  | insulator |
| Hg1O4W1_ICSD_169671      | insulator  | insulator |
| Hg1O6V2_ICSD_26996       | insulator  | insulator |
| Hg1O7P2Pd1_ICSD_420533   | insulator  | insulator |
| Hg1O8P2Pd2_ICSD_420532   | insulator  | insulator |
| Hg1P1Pd5_ICSD_639128     | metal      | metal     |
| Hg1P1Pt5_ICSD_639129     | metal      | metal     |
| Hg1Pb1Sr1_ICSD_602710    | metal      | metal     |
| Hg1Pb1Yb1_ICSD_108545    | metal      | metal     |
| Hg1Pd1Pr1_ICSD_657952    | metal      | metal     |
| Hg1Pd1Sm1_ICSD_106784    | metal      | metal     |
| Hg1Pd1_ICSD_40321        | metal      | metal     |
| Hg1Pd1_ICSD_639137       | metal      | metal     |
| Hg1Pd5Se1_ICSD_639142    | metal      | metal     |
| Hg1Pr1_ICSD_104336       | metal      | metal     |
| Hg1Pt1_ICSD_104337       | metal      | metal     |
| Hg1Pt2Se3_ICSD_185808    | metal      | insulator |
| Hg1Pt3_ICSD_639147       | metal      | metal     |
| Hg1Rb1Sb1Se3_ICSD_89018  | insulator  | insulator |
| Hg1Rb2Sn1Te4_ICSD_262390 | insulator  | insulator |
| Hg1Rb6S4_ICSD_639158     | insulator  | insulator |
| Hg1Rb6Se4_ICSD_639159    | insulator  | insulator |
| Hg1S1_ICSD_169614        | insulator  | insulator |
| Hg1S1_ICSD_169621        | metal      | metal     |
| Hg1S1_ICSD_31129         | metal      | metal     |
| Hg1S1_ICSD_639164        | metal      | metal     |
| Hg1S1_ICSD_81923         | insulator  | insulator |
| Hg1S2Ta1_ICSD_639178     | metal      | metal     |
| Hg1Sc1_ICSD_104342       | metal      | metal     |
| Hg1Se1_ICSD_639193       | metal      | metal     |
| Hg1Se1_ICSD_639194       | metal      | metal     |
| Hg1Se1_ICSD_639202       | insulator  | insulator |
| Hg1Se4Si1Ti2_ICSD_247763 | insulator  | insulator |
| Hg1Se4Sn1Ti2_ICSD_247764 | insulator  | insulator |
| Hg1Sn1Sr1_ICSD_602716    | metal      | metal     |
| Hg1Sn1Te4Ti2_ICSD_172505 | metal      | insulator |
| Hg1Sn1Yb1_ICSD_602718    | metal      | metal     |
| Hg1Sr1_ICSD_104345       | metal      | metal     |
| Hg1Sr3_ICSD_639226       | metal      | metal     |
| Hg1Tb1_ICSD_104348       | metal      | metal     |
| Hg1Te1_ICSD_162603       | insulator  | insulator |
| Hg1Te1_ICSD_162604       | metal      | metal     |
| Hg1Te1_ICSD_162605       | metal      | metal     |
| Hg1Te1_ICSD_56216        | metal      | metal     |
| Hg1Te1_ICSD_639251       | insulator  | insulator |
| Hg1Te1_ICSD_639258       | metal      | metal     |
| Hg1Th2_ICSD_104351       | metal      | metal     |

Supplementary Table 443. Five-fold cross validated predictions for the metal/insulator classification (435/598).

| system                | calculated | predicted |
|-----------------------|------------|-----------|
| Hg1Ti1_ICSD_104355    | metal      | metal     |
| Hg1Ti3_ICSD_104356    | metal      | metal     |
| Hg1Ti3_ICSD_104357    | metal      | metal     |
| Hg1Ti1_ICSD_104360    | metal      | metal     |
| Hg1Tm1_ICSD_104365    | metal      | metal     |
| Hg1Y1_ICSD_639300     | metal      | metal     |
| Hg1Yb1_ICSD_639303    | metal      | metal     |
| Hg1Zr1_ICSD_639318    | metal      | metal     |
| Hg1Zr3_ICSD_104375    | metal      | metal     |
| Hg1_ICSD_157861       | metal      | metal     |
| Hg1_ICSD_174006       | metal      | metal     |
| Hg1_ICSD_426945       | metal      | metal     |
| Hg1_ICSD_56897        | metal      | metal     |
| Hg1_ICSD_79804        | metal      | metal     |
| Hg20Rb3_ICSD_240037   | metal      | metal     |
| Hg2Ho1_ICSD_104298    | metal      | metal     |
| Hg2Ho1_ICSD_639033    | metal      | metal     |
| Hg2I1Na1O2_ICSD_36110 | insulator  | insulator |
| Hg2I1O1_ICSD_33275    | insulator  | insulator |
| Hg2I2Pb1S2_ICSD_59204 | insulator  | insulator |
| Hg2I2_ICSD_36189      | insulator  | insulator |
| Hg2I4_ICSD_241174     | metal      | insulator |
| Hg2K1_ICSD_104303     | metal      | metal     |
| Hg2La1_ICSD_104306    | metal      | metal     |
| Hg2La1_ICSD_639067    | metal      | metal     |
| Hg2Mg1_ICSD_104319    | metal      | metal     |
| Hg2Mo1O4_ICSD_90083   | insulator  | insulator |
| Hg2Mo1O4_ICSD_90084   | insulator  | insulator |
| Hg2Mo2O7_ICSD_51511   | insulator  | insulator |
| Hg2Mo2O7_ICSD_83374   | insulator  | insulator |
| Hg2N2O4_ICSD_60055    | insulator  | insulator |
| Hg2N2O6_ICSD_412933   | insulator  | insulator |
| Hg2N6_ICSD_98661      | insulator  | insulator |
| Hg2Na1_ICSD_104327    | metal      | metal     |
| Hg2Na3_ICSD_104328    | metal      | metal     |
| Hg2Nb2O7_ICSD_22226   | insulator  | insulator |
| Hg2Nd1_ICSD_104331    | metal      | metal     |
| Hg2O3Se1_ICSD_412303  | insulator  | insulator |
| Hg2O3Se1_ICSD_412304  | insulator  | insulator |
| Hg2O4S1_ICSD_15005    | insulator  | insulator |
| Hg2O4Se1_ICSD_15006   | insulator  | insulator |
| Hg2O4W1_ICSD_90085    | insulator  | insulator |
| Hg2O5Te1_ICSD_98671   | insulator  | insulator |
| Hg2O7Os2_ICSD_159801  | metal      | metal     |
| Hg2O7P2_ICSD_59280    | insulator  | insulator |
| Hg2O7Ru2_ICSD_420818  | metal      | metal     |
| Hg2O7Sb2_ICSD_160088  | metal      | insulator |
| Hg2O7V2_ICSD_2517     | insulator  | insulator |
| Hg2P2S6_ICSD_2564     | insulator  | insulator |
| Hg2P2S7_ICSD_2490     | insulator  | insulator |

Supplementary Table 444. Five-fold cross validated predictions for the metal/insulator classification (436/598).

| system                 | calculated | predicted |
|------------------------|------------|-----------|
| Hg2P2Se6.ICSD.639132   | insulator  | insulator |
| Hg2Pt1.ICSD.104339     | metal      | metal     |
| Hg2Rb1.ICSD.408698     | metal      | metal     |
| Hg2Rh1.ICSD.106786     | metal      | metal     |
| Hg2Se4Sn1.ICSD.95061   | metal      | insulator |
| Hg2Sr1.ICSD.104346     | metal      | metal     |
| Hg2Sr1.ICSD.104347     | metal      | metal     |
| Hg2Sr3.ICSD.247135     | metal      | metal     |
| Hg2Tb1.ICSD.639230     | metal      | metal     |
| Hg2Th1.ICSD.639269     | metal      | metal     |
| Hg2U1.ICSD.639291      | metal      | metal     |
| Hg2Y1.ICSD.104368      | metal      | metal     |
| Hg2Yb1.ICSD.104371     | metal      | metal     |
| Hg3Ho1.ICSD.639032     | metal      | metal     |
| Hg3I2S2.ICSD.411154    | insulator  | insulator |
| Hg3I2Se2.ICSD.99093    | insulator  | insulator |
| Hg3I2Te2.ICSD.65806    | insulator  | insulator |
| Hg3La1.ICSD.639068     | metal      | metal     |
| Hg3Li1.ICSD.639074     | metal      | metal     |
| Hg3Lu1.ICSD.639079     | metal      | metal     |
| Hg3Mg5.ICSD.104320     | metal      | metal     |
| Hg3Na2S4.ICSD.71597    | insulator  | insulator |
| Hg3O10Se3.ICSD.280914  | insulator  | insulator |
| Hg3O5Se4.ICSD.418001   | insulator  | insulator |
| Hg3O6S1.ICSD.24147     | insulator  | insulator |
| Hg3O6S1.ICSD.96753     | insulator  | insulator |
| Hg3O6Te1.ICSD.30325    | insulator  | insulator |
| Hg3O6Te1.ICSD.98672    | insulator  | insulator |
| Hg3Rb2S8Sn2.ICSD.85599 | insulator  | insulator |
| Hg3S4Ti2.ICSD.182745   | insulator  | insulator |
| Hg3Sc1.ICSD.104343     | metal      | metal     |
| Hg3Se4Ti2.ICSD.182746  | insulator  | insulator |
| Hg3Sr1.ICSD.247136     | metal      | metal     |
| Hg3Sr1.ICSD.247140     | metal      | metal     |
| Hg3Tb1.ICSD.639229     | metal      | metal     |
| Hg3Te4Ti2.ICSD.182747  | insulator  | insulator |
| Hg3Th1.ICSD.639268     | metal      | metal     |
| Hg3Ti1.ICSD.104362     | metal      | metal     |
| Hg3U1.ICSD.639292      | metal      | metal     |
| Hg3Y1.ICSD.104369      | metal      | metal     |
| Hg3Yb1.ICSD.639305     | metal      | metal     |
| Hg3Zr1.ICSD.639314     | metal      | metal     |
| Hg4I3Sb2.ICSD.80588    | insulator  | insulator |
| Hg4N2O8.ICSD.59156     | insulator  | insulator |
| Hg4N2O8.ICSD.61101     | metal      | insulator |
| Hg4Ni1.ICSD.151197     | metal      | metal     |
| Hg4Pt1.ICSD.655081     | metal      | metal     |
| Hg4S6Si1.ICSD.95227    | insulator  | insulator |
| Hg4Se6Si1.ICSD.95228   | metal      | insulator |
| Hg5Mn2.ICSD.104324     | metal      | metal     |

Supplementary Table 445. Five-fold cross validated predictions for the metal/insulator classification (437/598).

| system                    | calculated | predicted |
|---------------------------|------------|-----------|
| Hg5Pd2.ICSD.104334        | metal      | metal     |
| Hg6O7Si2.ICSD.69123       | insulator  | insulator |
| Hg6O8P2.ICSD.410760       | insulator  | insulator |
| Hg7K2.ICSD.107482         | metal      | metal     |
| Hg7O10P2.ICSD.411300      | insulator  | insulator |
| Hg7Rb2.ICSD.107483        | metal      | metal     |
| Hg9Li6Sr17.ICSD.420847    | metal      | metal     |
| Hg9O16P4.ICSD.411299      | insulator  | insulator |
| Ho11In6Si4.ICSD.184238    | metal      | metal     |
| Ho11Sn10.ICSD.639754      | metal      | metal     |
| Ho16Mg24Zn122.ICSD.240202 | metal      | metal     |
| Ho1I1S1.ICSD.425285       | insulator  | insulator |
| Ho1In1Ir1.ICSD.414477     | metal      | metal     |
| Ho1In1Mg1.ICSD.55103      | metal      | metal     |
| Ho1In1Ni1.ICSD.639339     | metal      | metal     |
| Ho1In1Pd1.ICSD.639340     | metal      | metal     |
| Ho1In1Pt1.ICSD.411457     | metal      | metal     |
| Ho1In1Pt2.ICSD.639343     | metal      | metal     |
| Ho1In1Pt4.ICSD.639342     | metal      | metal     |
| Ho1In1Rh1.ICSD.412916     | metal      | metal     |
| Ho1In1Zn1.ICSD.639346     | metal      | metal     |
| Ho1In1.ICSD.104410        | metal      | metal     |
| Ho1In2Ni9.ICSD.600163     | metal      | metal     |
| Ho1In3.ICSD.657246        | metal      | metal     |
| Ho1In5Rh1.ICSD.155805     | metal      | metal     |
| Ho1Ir1Si1.ICSD.93222      | metal      | metal     |
| Ho1Ir1Si3.ICSD.639360     | metal      | metal     |
| Ho1Ir1Sn1.ICSD.639364     | metal      | metal     |
| Ho1Ir1.ICSD.104415        | metal      | metal     |
| Ho1Ir2Si2.ICSD.639357     | metal      | metal     |
| Ho1Ir2Si2.ICSD.639359     | metal      | metal     |
| Ho1Ir2.ICSD.104416        | metal      | metal     |
| Ho1K1O8W2.ICSD.182626     | insulator  | insulator |
| Ho1K1S2.ICSD.44947        | insulator  | insulator |
| Ho1Li1O2.ICSD.109172      | insulator  | insulator |
| Ho1Li1S2.ICSD.639371      | insulator  | insulator |
| Ho1Li1Se2.ICSD.44965      | insulator  | insulator |
| Ho1Li1Sn1.ICSD.603145     | metal      | metal     |
| Ho1Li1Sn2.ICSD.639377     | metal      | metal     |
| Ho1Mg1Sn1.ICSD.183527     | metal      | metal     |
| Ho1Mg1.ICSD.161749        | metal      | metal     |
| Ho1Mg2.ICSD.639381        | metal      | metal     |
| Ho1Mn12.ICSD.26825        | metal      | metal     |
| Ho1Mn1O3.ICSD.182632      | insulator  | insulator |
| Ho1Mn1Si1.ICSD.83989      | metal      | metal     |
| Ho1Mn2O5.ICSD.84354       | insulator  | insulator |
| Ho1Mn2Si2.ICSD.55813      | metal      | metal     |
| Ho1Mn2.ICSD.104421        | metal      | metal     |
| Ho1Mn2.ICSD.180150        | metal      | metal     |
| Ho1Mn2.ICSD.602152        | metal      | metal     |

Supplementary Table 446. Five-fold cross validated predictions for the metal/insulator classification (438/598).

| system                 | calculated | predicted |
|------------------------|------------|-----------|
| Ho1Mn2.ICSD_639394     | metal      | metal     |
| Ho1Mn2.ICSD_639399     | metal      | metal     |
| Ho1Mn6Sn6.ICSD_240184  | metal      | metal     |
| Ho1Mn6Sn6.ICSD_57390   | metal      | metal     |
| Ho1Mo6S8.ICSD_639427   | metal      | metal     |
| Ho1Mo6Se8.ICSD_639431  | metal      | metal     |
| Ho1N1.ICSD_169207      | insulator  | insulator |
| Ho1N1.ICSD_187360      | metal      | metal     |
| Ho1Na1S2.ICSD_56229    | insulator  | insulator |
| Ho1Na1Se2.ICSD_639444  | insulator  | insulator |
| Ho1Nb1O4.ICSD_73392    | insulator  | insulator |
| Ho1Ni10Si2.ICSD_97037  | metal      | metal     |
| Ho1Ni1P1.ICSD_639495   | metal      | metal     |
| Ho1Ni1Sb1.ICSD_639501  | insulator  | insulator |
| Ho1Ni1Sb2.ICSD_658216  | metal      | metal     |
| Ho1Ni1Si2.ICSD_658584  | metal      | metal     |
| Ho1Ni1Sn1.ICSD_57391   | metal      | metal     |
| Ho1Ni1.ICSD_106792     | metal      | metal     |
| Ho1Ni2P2.ICSD_639493   | metal      | metal     |
| Ho1Ni2Sb2.ICSD_639499  | metal      | metal     |
| Ho1Ni2Si2.ICSD_56232   | metal      | metal     |
| Ho1Ni2.ICSD_639485     | metal      | metal     |
| Ho1Ni3.ICSD_639455     | metal      | metal     |
| Ho1Ni4P2.ICSD_601113   | metal      | metal     |
| Ho1Ni5.ICSD_639458     | metal      | metal     |
| Ho1Ni5.ICSD_639471     | metal      | metal     |
| Ho1O2Rb1.ICSD_15160    | insulator  | insulator |
| Ho1O3V1.ICSD_10018     | insulator  | insulator |
| Ho1O4P1.ICSD_246677    | insulator  | insulator |
| Ho1O4Ta1.ICSD_415436   | insulator  | insulator |
| Ho1O4Ta1.ICSD_79499    | insulator  | insulator |
| Ho1O4V1.ICSD_78079     | insulator  | insulator |
| Ho1O6Re1Sr2.ICSD_25403 | metal      | metal     |
| Ho1O6Rh1Sr3.ICSD_51056 | insulator  | insulator |
| Ho1Os2Si2.ICSD_90340   | metal      | metal     |
| Ho1Os2.ICSD_639530     | metal      | metal     |
| Ho1P1S1.ICSD_639545    | insulator  | insulator |
| Ho1P1.ICSD_187362      | metal      | metal     |
| Ho1P1.ICSD_43542       | metal      | metal     |
| Ho1P2Ru2.ICSD_602102   | metal      | metal     |
| Ho1P5.ICSD_409185      | insulator  | insulator |
| Ho1Pb3.ICSD_104431     | metal      | metal     |
| Ho1Pd1Sb1.ICSD_108547  | insulator  | metal     |
| Ho1Pd1Sn1.ICSD_639580  | metal      | metal     |
| Ho1Pd1Sn1.ICSD_99207   | metal      | metal     |
| Ho1Pd1Ti1.ICSD_104439  | metal      | metal     |
| Ho1Pd1Zn1.ICSD_183342  | metal      | metal     |
| Ho1Pd1.ICSD_104433     | metal      | metal     |
| Ho1Pd1.ICSD_639565     | metal      | metal     |
| Ho1Pd2Si1.ICSD_639571  | metal      | metal     |

Supplementary Table 447. Five-fold cross validated predictions for the metal/insulator classification (439/598).

| system                | calculated | predicted |
|-----------------------|------------|-----------|
| Ho1Pd2Si2.ICSD_602292 | metal      | metal     |
| Ho1Pd2Sn1.ICSD_104437 | metal      | metal     |
| Ho1Pd3S4.ICSD_639568  | metal      | metal     |
| Ho1Pd3.ICSD_659826    | metal      | metal     |
| Ho1Pt1Sb1.ICSD_56237  | metal      | metal     |
| Ho1Pt1Si1.ICSD_639611 | metal      | metal     |
| Ho1Pt1Sn1.ICSD_104444 | metal      | metal     |
| Ho1Pt1.ICSD_639599    | metal      | metal     |
| Ho1Pt2Si1.ICSD_639610 | metal      | metal     |
| Ho1Pt2Si2.ICSD_639612 | metal      | metal     |
| Ho1Pt2.ICSD_104441    | metal      | metal     |
| Ho1Pt3.ICSD_659827    | metal      | metal     |
| Ho1Rb1S2.ICSD_81403   | insulator  | insulator |
| Ho1Rb1Se2.ICSD_281074 | insulator  | insulator |
| Ho1Re2.ICSD_639615    | metal      | metal     |
| Ho1Rh1Si1.ICSD_56240  | metal      | metal     |
| Ho1Rh1Sn1.ICSD_639638 | metal      | metal     |
| Ho1Rh1Zn1.ICSD_419898 | metal      | metal     |
| Ho1Rh1.ICSD_639620    | metal      | metal     |
| Ho1Rh2Si2.ICSD_602159 | metal      | metal     |
| Ho1Rh2.ICSD_104447    | metal      | metal     |
| Ho1Rh3Si2.ICSD_56243  | metal      | metal     |
| Ho1Ru1Si1.ICSD_88066  | metal      | metal     |
| Ho1Ru2Si2.ICSD_639648 | metal      | metal     |
| Ho1Ru2.ICSD_639647    | metal      | metal     |
| Ho1S1.ICSD_639662     | metal      | metal     |
| Ho1S1.ICSD_66357      | metal      | metal     |
| Ho1S2Ti1.ICSD_639673  | insulator  | insulator |
| Ho1S2.ICSD_56245      | metal      | metal     |
| Ho1S2.ICSD_639660     | metal      | metal     |
| Ho1Sb1Zr1.ICSD_152642 | metal      | metal     |
| Ho1Sb1.ICSD_639701    | metal      | metal     |
| Ho1Sb2.ICSD_26220     | metal      | metal     |
| Ho1Se1.ICSD_43547     | metal      | metal     |
| Ho1Se2Ti1.ICSD_639712 | insulator  | insulator |
| Ho1Se2.ICSD_639707    | metal      | metal     |
| Ho1Si1.7.ICSD_415598  | metal      | metal     |
| Ho1Si1Ti1.ICSD_88117  | metal      | metal     |
| Ho1Si1.ICSD_154701    | metal      | metal     |
| Ho1Si1.ICSD_182225    | metal      | metal     |
| Ho1Si2.ICSD_639748    | metal      | metal     |
| Ho1Si2.ICSD_639750    | metal      | metal     |
| Ho1Si3.ICSD_710068    | metal      | metal     |
| Ho1Sn2Zn1.ICSD_183311 | metal      | metal     |
| Ho1Sn2.ICSD_168677    | metal      | metal     |
| Ho1Sn3.ICSD_104449    | metal      | metal     |
| Ho1Te2.ICSD_639759    | metal      | metal     |
| Ho1Te1.ICSD_639766    | metal      | metal     |
| Ho1Te2Ti1.ICSD_639771 | insulator  | insulator |
| Ho1Te2.ICSD_639765    | metal      | metal     |

Supplementary Table 448. Five-fold cross validated predictions for the metal/insulator classification (440/598).

| system                 | calculated | predicted |
|------------------------|------------|-----------|
| Ho1Ti11.ICSD_104454    | metal      | metal     |
| Ho1Ti3.ICSD_104456     | metal      | metal     |
| Ho1Zn12.ICSD_639795    | metal      | metal     |
| Ho1Zn1.ICSD_639797     | metal      | metal     |
| Ho1Zn2.ICSD_104460     | metal      | metal     |
| Ho1Zn3.ICSD_104461     | metal      | metal     |
| Ho1Zn5.ICSD_639802     | metal      | metal     |
| Ho1.ICSD_102660        | metal      | metal     |
| Ho1.ICSD_56224         | metal      | metal     |
| Ho1.ICSD_56227         | metal      | metal     |
| Ho1.ICSD_639322        | metal      | metal     |
| Ho2In1Ni2.ICSD_639335  | metal      | metal     |
| Ho2In1Ni2.ICSD_639337  | metal      | metal     |
| Ho2In1Pd2.ICSD_54486   | metal      | metal     |
| Ho2In1.ICSD_639328     | metal      | metal     |
| Ho2Mg1Se4.ICSD_639387  | insulator  | insulator |
| Ho2Mo3Si4.ICSD_600649  | metal      | metal     |
| Ho2N3.ICSD_639435      | metal      | metal     |
| Ho2Ni12P7.ICSD_602484  | metal      | metal     |
| Ho2Ni2Pb1.ICSD_54612   | metal      | metal     |
| Ho2Ni2Sn1.ICSD_425430  | metal      | metal     |
| Ho2Ni3Si5.ICSD_84171   | metal      | metal     |
| Ho2O2S1.ICSD_109333    | insulator  | insulator |
| Ho2O2Se1.ICSD_25809    | insulator  | insulator |
| Ho2O3.ICSD_160214      | insulator  | insulator |
| Ho2O3.ICSD_41268       | insulator  | insulator |
| Ho2O3.ICSD_420710      | insulator  | insulator |
| Ho2O7Ru2.ICSD_96730    | insulator  | insulator |
| Ho2O7Sn2.ICSD_84748    | insulator  | insulator |
| Ho2Pb1Pd2.ICSD_99197   | metal      | metal     |
| Ho2Pb1S4.ICSD_639552   | insulator  | insulator |
| Ho2Pt1.ICSD_639592     | metal      | metal     |
| Ho2Rh1Si3.ICSD_97373   | metal      | metal     |
| Ho2S3.ICSD_22252       | insulator  | insulator |
| Ho2S3.ICSD_72291       | insulator  | insulator |
| Ho2S4Sr1.ICSD_639669   | insulator  | insulator |
| Ho2S4Zn1.ICSD_639680   | insulator  | insulator |
| Ho2Sb5.ICSD_412685     | metal      | metal     |
| Ho2Se3.ICSD_408345     | metal      | metal     |
| Ho2Se4Yb1.ICSD_639718  | insulator  | insulator |
| Ho2Zn17.ICSD_639794    | metal      | metal     |
| Ho2Zn17.ICSD_639799    | metal      | metal     |
| Ho3In1N1.ICSD_98505    | metal      | metal     |
| Ho3In5.ICSD_639331     | metal      | metal     |
| Ho3Ir1.ICSD_639347     | metal      | metal     |
| Ho3Ir4Si13.ICSD_600540 | metal      | metal     |
| Ho3Ni1.ICSD_639451     | metal      | metal     |
| Ho3Ni2.ICSD_639447     | metal      | metal     |
| Ho3Ni2.ICSD_639449     | metal      | metal     |
| Ho3Ni6Si2.ICSD_639508  | metal      | metal     |

Supplementary Table 449. Five-fold cross validated predictions for the metal/insulator classification (441/598).

| system                 | calculated | predicted |
|------------------------|------------|-----------|
| Ho3O3Sb1.ICSD_380458   | insulator  | insulator |
| Ho3O6Sc1.ICSD_23480    | insulator  | insulator |
| Ho3O7Re1.ICSD_245106   | insulator  | insulator |
| Ho3O7Ta1.ICSD_55656    | insulator  | insulator |
| Ho3Os1.ICSD_639528     | metal      | metal     |
| Ho3Os4Si13.ICSD_600537 | metal      | metal     |
| Ho3Pd2.ICSD_107684     | metal      | metal     |
| Ho3Pd4.ICSD_639562     | metal      | metal     |
| Ho3Pr1S6.ICSD_639588   | insulator  | insulator |
| Ho3Pt1.ICSD_639596     | metal      | metal     |
| Ho3Pt4.ICSD_639601     | metal      | metal     |
| Ho3Ru1.ICSD_639642     | metal      | metal     |
| Ho3Ti5.ICSD_639785     | metal      | metal     |
| Ho4In1Ir1.ICSD_418270  | metal      | metal     |
| Ho4In1Rh1.ICSD_417517  | metal      | metal     |
| Ho4Sb3.ICSD_639686     | metal      | metal     |
| Ho5In3.ICSD_639329     | metal      | metal     |
| Ho5In3.ICSD_639330     | metal      | metal     |
| Ho5In4Pd2.ICSD_165136  | metal      | metal     |
| Ho5Ir2.ICSD_639350     | metal      | metal     |
| Ho5Ir3.ICSD_639351     | metal      | metal     |
| Ho5Ir3.ICSD_639353     | metal      | metal     |
| Ho5Ir4Si10.ICSD_639362 | metal      | metal     |
| Ho5Mg24.ICSD_639380    | metal      | metal     |
| Ho5Ni1Pb3.ICSD_152605  | metal      | metal     |
| Ho5Ni2Sb1.ICSD_91136   | metal      | metal     |
| Ho5Pb3.ICSD_639546     | metal      | metal     |
| Ho5Pd1Sb2.ICSD_180045  | metal      | metal     |
| Ho5Pt3.ICSD_639590     | metal      | metal     |
| Ho5Rh3.ICSD_104448     | metal      | metal     |
| Ho5Ru2.ICSD_639641     | metal      | metal     |
| Ho5S7.ICSD_639657      | metal      | metal     |
| Ho5Sb3.ICSD_56248      | metal      | metal     |
| Ho5Si3.ICSD_639730     | metal      | metal     |
| Ho5Sn3.ICSD_104450     | metal      | metal     |
| Ho5Ti3.ICSD_639784     | metal      | metal     |
| Ho5Ti3.ICSD_639788     | metal      | metal     |
| Ho6Mn1Te2.ICSD_182412  | metal      | metal     |
| Ho6Mn1Te2.ICSD_182414  | metal      | metal     |
| Ho6Mn23.ICSD_104422    | metal      | metal     |
| Ho6N2Se6.ICSD_420157   | insulator  | insulator |
| Ho6O12W1.ICSD_92038    | insulator  | insulator |
| Ho6Zn23.ICSD_639793    | metal      | metal     |
| Ho7I12Os1.ICSD_424454  | metal      | metal     |
| I0.33Nb1Se4.ICSD_1092  | metal      | insulator |
| I10Ir1Tb6.ICSD_424438  | insulator  | metal     |
| I10Ir1Y6.ICSD_74650    | metal      | insulator |
| I10Ir2Te16.ICSD_425201 | insulator  | insulator |
| I10La6Os1.ICSD_409817  | insulator  | metal     |
| I10Os1Tb6.ICSD_424439  | metal      | insulator |

Supplementary Table 450. Five-fold cross validated predictions for the metal/insulator classification (442/598).

| system                  | calculated | predicted |
|-------------------------|------------|-----------|
| I10Os1Y6_ICSD_74649     | metal      | metal     |
| I10Pt1Y6_ICSD_424468    | insulator  | insulator |
| I10Ru1Y6_ICSD_74645     | insulator  | metal     |
| I12K4O1Ti4_ICSD_413504  | insulator  | insulator |
| I12La6Os1Sr1_ICSD_94879 | metal      | metal     |
| I12Nb2Te8_ICSD_78371    | insulator  | insulator |
| I12Ru2Te14_ICSD_425196  | insulator  | insulator |
| I14K1Zr6_ICSD_201675    | metal      | insulator |
| I14Mo6Pb1_ICSD_36574    | insulator  | insulator |
| I15La10Os2_ICSD_83856   | insulator  | metal     |
| I1In1Te1_ICSD_100703    | insulator  | insulator |
| I1In1_ICSD_55184        | insulator  | insulator |
| I1In3Te3_ICSD_66032     | insulator  | insulator |
| I1K1Ni1O6_ICSD_60313    | insulator  | insulator |
| I1K1O3_ICSD_28545       | metal      | insulator |
| I1K1O3_ICSD_423584      | insulator  | insulator |
| I1K1O3_ICSD_424864      | insulator  | insulator |
| I1K1O3_ICSD_9329        | insulator  | insulator |
| I1K1O3_ICSD_97995       | insulator  | insulator |
| I1K1O4_ICSD_83377       | insulator  | insulator |
| I1K1_ICSD_22158         | insulator  | insulator |
| I1K1_ICSD_61555         | insulator  | insulator |
| I1K3O1_ICSD_36512       | insulator  | insulator |
| I1K3O5_ICSD_4325        | insulator  | insulator |
| I1La1O1_ICSD_24613      | insulator  | insulator |
| I1La1_ICSD_83678        | metal      | metal     |
| I1La2Ni2_ICSD_165262    | metal      | metal     |
| I1La3S8Si2_ICSD_280940  | insulator  | insulator |
| I1La5Pb3_ICSD_409778    | metal      | metal     |
| I1La5Sn3_ICSD_95240     | metal      | metal     |
| I1Li1Mo1O6_ICSD_156006  | insulator  | insulator |
| I1Li1O3_ICSD_20012      | metal      | insulator |
| I1Li1O3_ICSD_20032      | insulator  | insulator |
| I1Li1O3_ICSD_2642       | insulator  | insulator |
| I1Li1O3_ICSD_40364      | insulator  | insulator |
| I1Li1O3_ICSD_41199      | insulator  | insulator |
| I1Li1O4_ICSD_400552     | insulator  | insulator |
| I1Li1_ICSD_414242       | insulator  | insulator |
| I1Li1_ICSD_44275        | insulator  | insulator |
| I1Li1_ICSD_44781        | insulator  | insulator |
| I1Li6P1S5_ICSD_421083   | insulator  | insulator |
| I1Li7N2_ICSD_16799      | metal      | insulator |
| I1Lu1O1_ICSD_240948     | insulator  | insulator |
| I1Mn1Sb1Se2_ICSD_281558 | insulator  | insulator |
| I1N1Sr2_ICSD_172602     | insulator  | insulator |
| I1N1Ti1_ICSD_27394      | insulator  | insulator |
| I1N1Zn2_ICSD_425735     | insulator  | insulator |
| I1N1Zr1_ICSD_27392      | insulator  | insulator |
| I1N1Zr1_ICSD_51772      | insulator  | insulator |
| I1N3Rb2_ICSD_202077     | insulator  | insulator |

Supplementary Table 451. Five-fold cross validated predictions for the metal/insulator classification (443/598).

| system                 | calculated | predicted |
|------------------------|------------|-----------|
| I1Na1Ni1O6_ICSD_23543  | insulator  | insulator |
| I1Na1O3_ICSD_20168     | insulator  | insulator |
| I1Na1O3_ICSD_33664     | metal      | insulator |
| I1Na1O4_ICSD_14287     | insulator  | insulator |
| I1Na1_ICSD_52240       | insulator  | insulator |
| I1Nb1O2_ICSD_418061    | insulator  | insulator |
| I1Nb1Se1_ICSD_201283   | insulator  | insulator |
| I1Nb2Te6_ICSD_71516    | insulator  | insulator |
| I1Ni2Pr2_ICSD_84702    | metal      | metal     |
| I1O1Sc1_ICSD_419335    | insulator  | insulator |
| I1O1Y1_ICSD_0          | insulator  | insulator |
| I1O3Rb1_ICSD_2825      | insulator  | insulator |
| I1O3Ti1_ICSD_62106     | insulator  | insulator |
| I1O3Ti1_ICSD_76967     | metal      | insulator |
| I1O4Rb1_ICSD_89510     | insulator  | insulator |
| I1O4Ti1_ICSD_52342     | insulator  | insulator |
| I1O5Rb3_ICSD_4326      | insulator  | insulator |
| I1O6Rb1Sn1_ICSD_73614  | insulator  | insulator |
| I1O7Sb5_ICSD_146       | insulator  | insulator |
| I1O7Sb5_ICSD_62369     | insulator  | insulator |
| I1P3Se4_ICSD_62673     | insulator  | insulator |
| I1Pd1Te1_ICSD_50987    | metal      | insulator |
| I1Rb1_ICSD_53831       | insulator  | insulator |
| I1Rb1_ICSD_61523       | insulator  | insulator |
| I1S1Sb1_ICSD_25572     | insulator  | insulator |
| I1S1Sb1_ICSD_28264     | insulator  | insulator |
| I1S1Sb1_ICSD_28265     | insulator  | insulator |
| I1S1Sb1_ICSD_28305     | insulator  | insulator |
| I1S1Sb1_ICSD_41589     | insulator  | insulator |
| I1S1Sb1_ICSD_85298     | insulator  | insulator |
| I1S1Sb1_ICSD_85299     | insulator  | insulator |
| I1S1Sm1_ICSD_2510      | metal      | insulator |
| I1S8Si2Tb3_ICSD_411784 | insulator  | insulator |
| I1Sb1Se1_ICSD_31292    | metal      | insulator |
| I1Sb1Se1_ICSD_35470    | insulator  | insulator |
| I1Sb1Te1_ICSD_35471    | insulator  | insulator |
| I1Se2Ti5_ICSD_152031   | insulator  | insulator |
| I1Se8Ta2_ICSD_35190    | metal      | insulator |
| I1Ta1Te4_ICSD_67533    | insulator  | insulator |
| I1Te1_ICSD_108         | insulator  | insulator |
| I1Te1_ICSD_109         | insulator  | insulator |
| I1Ti1_ICSD_55194       | insulator  | insulator |
| I1Ti1_ICSD_60491       | insulator  | insulator |
| I1Ti1_ICSD_61520       | insulator  | insulator |
| I1_ICSD_109039         | metal      | metal     |
| I1_ICSD_109040         | metal      | metal     |
| I2K4O9_ICSD_25694      | insulator  | insulator |
| I2La1_ICSD_72191       | metal      | metal     |
| I2La2O4Si1_ICSD_72653  | insulator  | insulator |
| I2La2P1_ICSD_418010    | metal      | metal     |

Supplementary Table 452. Five-fold cross validated predictions for the metal/insulator classification (444/598).

| system                 | calculated | predicted |
|------------------------|------------|-----------|
| I2La2Te1.ICSD_240698   | metal      | metal     |
| I2Mg1.ICSD_281551      | insulator  | insulator |
| I2Mn1.ICSD_33673       | insulator  | insulator |
| I2N2S1.ICSD_72363      | insulator  | insulator |
| I2Na4O1.ICSD_67112     | insulator  | insulator |
| I2Nb1O1.ICSD_36255     | insulator  | insulator |
| I2Nd1.ICSD_72190       | metal      | metal     |
| I2Ni1.ICSD_22108       | insulator  | insulator |
| I2O1Sr2.ICSD_409896    | insulator  | insulator |
| I2O1Ta1.ICSD_80109     | insulator  | insulator |
| I2O2Pb3.ICSD_201857    | insulator  | insulator |
| I2O4.ICSD_182670       | insulator  | insulator |
| I2O5.ICSD_182671       | insulator  | insulator |
| I2O6Pb1.ICSD_74493     | insulator  | insulator |
| I2O6Pb3Se2.ICSD_422641 | insulator  | insulator |
| I2O6S1.ICSD_6220       | insulator  | insulator |
| I2O6Zn1.ICSD_54086     | insulator  | insulator |
| I2O7Ti1.ICSD_424632    | insulator  | insulator |
| I2O8Rb1V1.ICSD_281304  | insulator  | insulator |
| I2O8U1.ICSD_92833      | insulator  | insulator |
| I2P4S3.ICSD_26219      | insulator  | insulator |
| I2P4S3.ICSD_26485      | insulator  | insulator |
| I2P4Se3.ICSD_14281     | insulator  | insulator |
| I2P4Se3.ICSD_36365     | insulator  | insulator |
| I2Pb1.ICSD_108914      | insulator  | insulator |
| I2Pb1.ICSD_23762       | insulator  | insulator |
| I2Pb1.ICSD_23763       | insulator  | insulator |
| I2Pb1.ICSD_23764       | insulator  | insulator |
| I2Pb1.ICSD_24263       | insulator  | insulator |
| I2Pb1.ICSD_24264       | insulator  | insulator |
| I2Pb1.ICSD_24265       | insulator  | insulator |
| I2Pb1.ICSD_60186       | insulator  | insulator |
| I2Pb1.ICSD_60327       | insulator  | insulator |
| I2Pb1.ICSD_77324       | insulator  | insulator |
| I2Pd1Te1.ICSD_409062   | insulator  | insulator |
| I2Pd1.ICSD_23169       | insulator  | insulator |
| I2Pd1.ICSD_25120       | insulator  | insulator |
| I2Pr1.ICSD_10510       | metal      | metal     |
| I2Pt1.ICSD_60760       | insulator  | insulator |
| I2Sn1.ICSD_2831        | insulator  | insulator |
| I2Sr1.ICSD_203137      | insulator  | insulator |
| I2Sr1.ICSD_37050       | insulator  | insulator |
| I2Te2Th1.ICSD_94402    | insulator  | insulator |
| I2Th1.ICSD_22233       | metal      | metal     |
| I2Tm1.ICSD_43731       | insulator  | metal     |
| I2V1.ICSD_246907       | insulator  | insulator |
| I2Yb1.ICSD_77907       | insulator  | insulator |
| I2Zn1.ICSD_48016       | metal      | insulator |
| I2Zn1.ICSD_77058       | insulator  | insulator |
| I2Zr1.ICSD_24807       | insulator  | insulator |

Supplementary Table 453. Five-fold cross validated predictions for the metal/insulator classification (445/598).

| system                 | calculated | predicted |
|------------------------|------------|-----------|
| I2Zr1.ICSD_26418       | insulator  | insulator |
| I2.ICSD_20329          | insulator  | insulator |
| I2.ICSD_67616          | insulator  | insulator |
| I3In1O9.ICSD_154654    | insulator  | insulator |
| I3In1O9.ICSD_250450    | insulator  | insulator |
| I3Ir1Y3.ICSD_71524     | metal      | metal     |
| I3K1Tm1.ICSD_72343     | metal      | insulator |
| I3La3P1.ICSD_411801    | metal      | metal     |
| I3La3Pb1.ICSD_409796   | metal      | metal     |
| I3La3Ru1.ICSD_280447   | metal      | metal     |
| I3La3Sb1.ICSD_411804   | metal      | metal     |
| I3La4Si4.ICSD_407247   | metal      | metal     |
| I3La5Si5.ICSD_407248   | metal      | metal     |
| I3Li1Sc1.ICSD_73339    | metal      | insulator |
| I3Mn1Ti1.ICSD_26420    | insulator  | insulator |
| I3Na1O8.ICSD_418336    | insulator  | insulator |
| I3Nb1O1.ICSD_418088    | insulator  | insulator |
| I3Nb1.ICSD_109145      | metal      | insulator |
| I3O13Rb1V2.ICSD_281306 | insulator  | insulator |
| I3O1W1.ICSD_65183      | insulator  | insulator |
| I3O9Sc1.ICSD_411945    | insulator  | insulator |
| I3O9Ti1.ICSD_247059    | insulator  | insulator |
| I3Os1Pr3.ICSD_84701    | metal      | metal     |
| I3P1.ICSD_311          | insulator  | insulator |
| I3Pb1Ti1.ICSD_1199     | insulator  | insulator |
| I3Pb2S2Sb1.ICSD_418344 | insulator  | insulator |
| I3Pr3Pt1.ICSD_71515    | metal      | metal     |
| I3Rb1Sn1.ICSD_400934   | insulator  | insulator |
| I3Rb1Yb1.ICSD_86314    | insulator  | insulator |
| I3Rb1.ICSD_61348       | insulator  | insulator |
| I3Ru1Y3.ICSD_71523     | metal      | metal     |
| I3S2Sb1Sn2.ICSD_23344  | insulator  | insulator |
| I3Sb1.ICSD_30906       | insulator  | insulator |
| I3Sb1.ICSD_56572       | insulator  | insulator |
| I3Ti1.ICSD_23172       | insulator  | insulator |
| I3Ti1.ICSD_61349       | insulator  | insulator |
| I3U1.ICSD_1851         | insulator  | insulator |
| I3U1.ICSD_201171       | insulator  | insulator |
| I3Y1.ICSD_170773       | insulator  | insulator |
| I3Zr1.ICSD_32704       | metal      | metal     |
| I3Zr1.ICSD_74648       | metal      | insulator |
| I4In1Li1.ICSD_36599    | insulator  | insulator |
| I4In1Na1.ICSD_65463    | insulator  | insulator |
| I4In2.ICSD_46034       | insulator  | insulator |
| I4Li2Zn1.ICSD_402062   | insulator  | insulator |
| I4Mg2O12.ICSD_415820   | insulator  | insulator |
| I4Mn2O12.ICSD_415822   | insulator  | insulator |
| I4Nb1.ICSD_23916       | insulator  | insulator |
| I4O12Zn2.ICSD_415821   | insulator  | insulator |
| I4O12Zr1.ICSD_15405    | insulator  | insulator |

Supplementary Table 454. Five-fold cross validated predictions for the metal/insulator classification (446/598).

| system                  | calculated | predicted |
|-------------------------|------------|-----------|
| I4O12.ICSD.80196        | insulator  | insulator |
| I4O1Te9Ti4.ICSD.82142   | insulator  | insulator |
| I4O20Ti2U3.ICSD.93862   | insulator  | insulator |
| I4P2.ICSD.36293         | insulator  | insulator |
| I4Pt1.ICSD.15173        | insulator  | insulator |
| I4Rb2Zn1.ICSD.56425     | insulator  | insulator |
| I4S1Ti6.ICSD.29265      | insulator  | insulator |
| I4Se1Ti6.ICSD.40520     | insulator  | insulator |
| I4Si1.ICSD.91745        | insulator  | insulator |
| I4Sn1.ICSD.18010        | insulator  | insulator |
| I4Sn1.ICSD.38140        | insulator  | insulator |
| I4Ta1.ICSD.391406       | insulator  | insulator |
| I4Te1.ICSD.37226        | insulator  | insulator |
| I4Ti1.ICSD.39820        | insulator  | insulator |
| I4Ti2Zn1.ICSD.37099     | insulator  | insulator |
| I4U1.ICSD.16464         | insulator  | insulator |
| I4Zr1.ICSD.62243        | insulator  | insulator |
| I4Zr1.ICSD.8068         | insulator  | insulator |
| I5In1Pb2.ICSD.152000    | insulator  | insulator |
| I5In1Sn2.ICSD.151995    | insulator  | insulator |
| I5In1Sr2.ICSD.152022    | insulator  | insulator |
| I5In3Sn1.ICSD.74762     | insulator  | insulator |
| I5K1Sn2.ICSD.152010     | insulator  | insulator |
| I5K2U1.ICSD.41550       | insulator  | insulator |
| I5La2.ICSD.409702       | metal      | insulator |
| I5Nb1.ICSD.10457        | insulator  | insulator |
| I5Nb1.ICSD.25503        | insulator  | insulator |
| I5Pb1Ti3.ICSD.85309     | insulator  | insulator |
| I5Pr2.ICSD.56830        | metal      | insulator |
| I5Pr4Ru1.ICSD.71161     | metal      | metal     |
| I6In1O18Rb3.ICSD.422058 | insulator  | insulator |
| I6In2.ICSD.23136        | insulator  | insulator |
| I6K2Pt1.ICSD.37190      | insulator  | insulator |
| I6K2Tc1.ICSD.65510      | insulator  | insulator |
| I6K2Te1.ICSD.23649      | metal      | insulator |
| I6Mo1O18Rb2.ICSD.413880 | insulator  | insulator |
| I6Na2U1.ICSD.78683      | insulator  | insulator |
| I6Nb2Se2.ICSD.410743    | insulator  | insulator |
| I6Nb2Te2.ICSD.35377     | insulator  | insulator |
| I6O18Rb2Zr1.ICSD.414091 | insulator  | insulator |
| I6O18Ti4.ICSD.247060    | insulator  | insulator |
| I6O1Sr4.ICSD.280585     | insulator  | insulator |
| I6Pb1Th1.ICSD.73139     | insulator  | insulator |
| I6Pb1Ti4.ICSD.100069    | insulator  | insulator |
| I6Pb5S2.ICSD.21040      | insulator  | insulator |
| I6Pd1Rb2.ICSD.92478     | metal      | insulator |
| I6Pt1Rb2.ICSD.37191     | insulator  | insulator |
| I6Pt2.ICSD.47120        | insulator  | insulator |
| I6Rb2Sn1.ICSD.22104     | metal      | insulator |
| I6Rb2Te1.ICSD.36009     | insulator  | insulator |

Supplementary Table 455. Five-fold cross validated predictions for the metal/insulator classification (447/598).

| system                 | calculated | predicted |
|------------------------|------------|-----------|
| I6Rb4Yb1.ICSD.72344    | insulator  | insulator |
| I6S1Sn4.ICSD.12165     | insulator  | insulator |
| I6Si2.ICSD.83643       | insulator  | insulator |
| I6Sn1Th1.ICSD.73138    | insulator  | insulator |
| I6Te1Ti2.ICSD.99128    | insulator  | insulator |
| I7In1Te1.ICSD.407981   | insulator  | insulator |
| I7Nb3Te1.ICSD.86723    | insulator  | insulator |
| I7Nb3Te1.ICSD.86724    | insulator  | insulator |
| I7Se1Ta3.ICSD.82791    | insulator  | insulator |
| I7Ta3Te1.ICSD.82792    | insulator  | insulator |
| I8Nb3.ICSD.25767       | insulator  | insulator |
| I8Pt3.ICSD.60761       | insulator  | insulator |
| I9Re3.ICSD.25114       | insulator  | insulator |
| In11La5Ni6.ICSD.639855 | metal      | metal     |
| In11Nd5Ni6.ICSD.410093 | metal      | metal     |
| In11Sr3.ICSD.240132    | metal      | metal     |
| In13Pd6Yb2.ICSD.391130 | metal      | metal     |
| In14K3Mg20.ICSD.172036 | metal      | metal     |
| In1Ir1Li2.ICSD.107089  | metal      | metal     |
| In1Ir1Li2.ICSD.639824  | metal      | metal     |
| In1Ir1Sm1.ICSD.414471  | metal      | metal     |
| In1Ir1Tb1.ICSD.414476  | metal      | metal     |
| In1Ir1Tb4.ICSD.418269  | metal      | metal     |
| In1Ir1Y4.ICSD.418567   | metal      | metal     |
| In1Ir2U2.ICSD.602811   | metal      | metal     |
| In1K1O2.ICSD.380401    | insulator  | insulator |
| In1K1O8W2.ICSD.10187   | insulator  | insulator |
| In1K1P2S7.ICSD.91755   | insulator  | insulator |
| In1K1Te2.ICSD.25347    | insulator  | insulator |
| In1K2Na1Sb2.ICSD.77181 | insulator  | insulator |
| In1K2P2S7.ICSD.248034  | insulator  | insulator |
| In1K3P2.ICSD.73281     | insulator  | insulator |
| In1La1Ni1.ICSD.639858  | metal      | metal     |
| In1La1Ni2.ICSD.106800  | metal      | metal     |
| In1La1O3.ICSD.281549   | insulator  | insulator |
| In1La1Pd1.ICSD.157624  | metal      | metal     |
| In1La1Pd1.ICSD.639859  | metal      | metal     |
| In1La1Pd2.ICSD.249793  | metal      | metal     |
| In1La1Pt1.ICSD.51956   | metal      | metal     |
| In1La1Pt4.ICSD.639860  | metal      | metal     |
| In1La1Rh1.ICSD.51957   | metal      | metal     |
| In1La1Zn1.ICSD.639873  | metal      | metal     |
| In1La1.ICSD.51948      | metal      | metal     |
| In1La2Ni2.ICSD.639854  | metal      | metal     |
| In1La2Pd2.ICSD.180806  | metal      | metal     |
| In1La2Pd2.ICSD.658291  | metal      | metal     |
| In1La2Rh2.ICSD.106975  | metal      | metal     |
| In1La2.ICSD.51949      | metal      | metal     |
| In1La3N1.ICSD.98494    | metal      | metal     |
| In1La3.ICSD.639851     | metal      | metal     |

Supplementary Table 456. Five-fold cross validated predictions for the metal/insulator classification (448/598).

| system                     | calculated | predicted |
|----------------------------|------------|-----------|
| In1Li1Mg1Mo3O12.ICSD.63519 | insulator  | insulator |
| In1Li1Mo2O8.ICSD.91269     | insulator  | insulator |
| In1Li1Mo3O8.ICSD.30579     | insulator  | insulator |
| In1Li1O2.ICSD.639886       | insulator  | insulator |
| In1Li1O6Si2.ICSD.55178     | insulator  | insulator |
| In1Li1O7P2.ICSD.60935      | insulator  | insulator |
| In1Li1O8W2.ICSD.423127     | insulator  | insulator |
| In1Li1Se2.ICSD.56531       | insulator  | insulator |
| In1Li1Se2.ICSD.56532       | insulator  | insulator |
| In1Li1Se2.ICSD.656944      | insulator  | insulator |
| In1Li1Sn1.ICSD.639905      | metal      | metal     |
| In1Li1Te2.ICSD.639906      | insulator  | insulator |
| In1Li1.ICSD.51959          | metal      | metal     |
| In1Li2Mg1.ICSD.51965       | metal      | metal     |
| In1Li2Pd1.ICSD.107088      | metal      | metal     |
| In1Li2Pt1.ICSD.106805      | metal      | metal     |
| In1Li2Rh1.ICSD.107087      | metal      | metal     |
| In1Li2.ICSD.51961          | metal      | metal     |
| In1Lu1Pd1.ICSD.639921      | metal      | metal     |
| In1Lu1Pd2.ICSD.51971       | metal      | metal     |
| In1Lu1Pt1.ICSD.108550      | metal      | metal     |
| In1Lu2Ni2.ICSD.639917      | metal      | metal     |
| In1Lu2Ni2.ICSD.639919      | metal      | metal     |
| In1Lu2Pd2.ICSD.54490       | metal      | metal     |
| In1Lu2.ICSD.51968          | metal      | metal     |
| In1Lu3N1.ICSD.98508        | metal      | metal     |
| In1Mg1Ni2.ICSD.51982       | metal      | metal     |
| In1Mg1Sm1.ICSD.413808      | metal      | metal     |
| In1Mg1Tm1.ICSD.55104       | metal      | metal     |
| In1Mg1Y1.ICSD.160910       | metal      | metal     |
| In1Mg1.ICSD.51972          | metal      | metal     |
| In1Mg2.ICSD.51974          | metal      | metal     |
| In1Mg3.ICSD.109832         | metal      | metal     |
| In1Mg3.ICSD.51975          | metal      | metal     |
| In1Mg3.ICSD.639928         | metal      | metal     |
| In1Mn1Ni2.ICSD.51985       | metal      | metal     |
| In1Mn1O3.ICSD.67671        | metal      | insulator |
| In1Mn1Pd2.ICSD.51988       | metal      | metal     |
| In1Mn1Ti2.ICSD.189700      | insulator  | metal     |
| In1Mo1S2.ICSD.603787       | metal      | metal     |
| In1Mo2O8Rb1.ICSD.10186     | insulator  | insulator |
| In1Mo3Se3.ICSD.53098       | metal      | metal     |
| In1Mo3Te3.ICSD.53100       | metal      | metal     |
| In1Mo6S8.ICSD.639993       | metal      | metal     |
| In1Mo6S8.ICSD.639998       | metal      | metal     |
| In1Mo6Se8.ICSD.23272       | metal      | metal     |
| In1N1Nd3.ICSD.53101        | metal      | metal     |
| In1N1Nd3.ICSD.98496        | metal      | metal     |
| In1N1Ni3.ICSD.247065       | metal      | metal     |
| In1N1Pr3.ICSD.98495        | metal      | metal     |

Supplementary Table 457. Five-fold cross validated predictions for the metal/insulator classification (449/598).

| system                  | calculated | predicted |
|-------------------------|------------|-----------|
| In1N1Sc3.ICSD.98499     | metal      | metal     |
| In1N1Tb3.ICSD.98498     | metal      | metal     |
| In1N1Ti2.ICSD.640030    | metal      | metal     |
| In1N1Ti3.ICSD.42929     | metal      | metal     |
| In1N1Tm3.ICSD.98507     | metal      | metal     |
| In1N1Zr2.ICSD.640031    | metal      | metal     |
| In1N1.ICSD.157514       | metal      | metal     |
| In1N1.ICSD.162684       | metal      | metal     |
| In1N1.ICSD.41501        | metal      | metal     |
| In1Na1O2.ICSD.34600     | insulator  | insulator |
| In1Na1O6Si2.ICSD.183781 | insulator  | insulator |
| In1Na1O8W2.ICSD.16263   | insulator  | insulator |
| In1Na1S2.ICSD.640037    | insulator  | insulator |
| In1Na1Se2.ICSD.25558    | insulator  | insulator |
| In1Na1Te2.ICSD.25346    | insulator  | insulator |
| In1Na1.ICSD.640032      | metal      | metal     |
| In1Na3O4Rb2.ICSD.33868  | insulator  | insulator |
| In1Na3O8P2.ICSD.87833   | insulator  | insulator |
| In1Na5O4.ICSD.69630     | insulator  | insulator |
| In1Na5S4.ICSD.300175    | insulator  | insulator |
| In1Nb1S2.ICSD.74702     | metal      | metal     |
| In1Nb1Se2.ICSD.640056   | metal      | metal     |
| In1Nb3.ICSD.51996       | metal      | metal     |
| In1Nb3.ICSD.51997       | metal      | metal     |
| In1Nb3.ICSD.640048      | metal      | metal     |
| In1Nd1Ni2.ICSD.658679   | metal      | metal     |
| In1Nd1Pd1.ICSD.153004   | metal      | metal     |
| In1Nd1Pt1.ICSD.59429    | metal      | metal     |
| In1Nd1Pt4.ICSD.640081   | metal      | metal     |
| In1Nd1Rh1.ICSD.59430    | metal      | metal     |
| In1Nd1Zn1.ICSD.640092   | metal      | metal     |
| In1Nd2Pd2.ICSD.54481    | metal      | metal     |
| In1Nd2Rh2.ICSD.106976   | metal      | metal     |
| In1Nd2.ICSD.59421       | metal      | metal     |
| In1Nd3.ICSD.640070      | metal      | metal     |
| In1Ni1O6Sr3.ICSD.81660  | metal      | insulator |
| In1Ni1Tb1.ICSD.55844    | metal      | metal     |
| In1Ni1Th1.ICSD.640155   | metal      | metal     |
| In1Ni1Ti2.ICSD.185667   | metal      | metal     |
| In1Ni1Tm1.ICSD.640163   | metal      | metal     |
| In1Ni1Y1.ICSD.59455     | metal      | metal     |
| In1Ni1.ICSD.161126      | metal      | metal     |
| In1Ni1.ICSD.59434       | metal      | metal     |
| In1Ni2Sc1.ICSD.59446    | metal      | metal     |
| In1Ni2Sc2.ICSD.107333   | metal      | metal     |
| In1Ni2Tb2.ICSD.167636   | metal      | metal     |
| In1Ni2Tb2.ICSD.640151   | metal      | metal     |
| In1Ni2Ti1.ICSD.59451    | metal      | metal     |
| In1Ni2Ti2.ICSD.107330   | metal      | metal     |
| In1Ni2Tm2.ICSD.640161   | metal      | metal     |

Supplementary Table 458. Five-fold cross validated predictions for the metal/insulator classification (450/598).

| system                  | calculated | predicted |
|-------------------------|------------|-----------|
| In1Ni2U1.ICSD.106862    | metal      | metal     |
| In1Ni2U2.ICSD.246629    | metal      | metal     |
| In1Ni2Y2.ICSD.640169    | metal      | metal     |
| In1Ni2Y2.ICSD.640170    | metal      | metal     |
| In1Ni2Zr1.ICSD.54546    | metal      | metal     |
| In1Ni2Zr2.ICSD.107372   | metal      | metal     |
| In1Ni2.ICSD.59437       | metal      | metal     |
| In1Ni3.ICSD.151196      | metal      | metal     |
| In1Ni3.ICSD.185623      | metal      | metal     |
| In1Ni3.ICSD.59439       | metal      | metal     |
| In1Ni4Tm1.ICSD.415030   | metal      | metal     |
| In1Ni4U1.ICSD.59454     | metal      | metal     |
| In1Ni4U1.ICSD.658029    | metal      | metal     |
| In1Ni4Zr1.ICSD.59462    | metal      | metal     |
| In1O1Pr3.ICSD.240907    | metal      | metal     |
| In1O3Y1.ICSD.251        | insulator  | insulator |
| In1O4P1.ICSD.16618      | insulator  | insulator |
| In1O4P1.ICSD.85579      | insulator  | insulator |
| In1O4V1.ICSD.155162     | insulator  | insulator |
| In1O4V1.ICSD.80360      | insulator  | insulator |
| In1O6Rh1Sr3.ICSD.51138  | insulator  | insulator |
| In1O6Sr2Ta1.ICSD.188420 | insulator  | insulator |
| In1O8Rb1W2.ICSD.24859   | insulator  | insulator |
| In1O8Se2V1.ICSD.261603  | insulator  | insulator |
| In1O9P3.ICSD.421261     | insulator  | insulator |
| In1P1Pd5.ICSD.640193    | metal      | metal     |
| In1P1Pt5.ICSD.640194    | metal      | metal     |
| In1P1S4.ICSD.1699       | insulator  | insulator |
| In1P1.ICSD.180911       | insulator  | metal     |
| In1P1.ICSD.53104        | metal      | metal     |
| In1P1.ICSD.600858       | insulator  | metal     |
| In1P2Se6Ti1.ICSD.171212 | insulator  | insulator |
| In1P3Sr3.ICSD.65056     | insulator  | insulator |
| In1P3.ICSD.37073        | metal      | insulator |
| In1Pb1Rh3S2.ICSD.640213 | metal      | metal     |
| In1Pd1Sr1.ICSD.640249   | metal      | metal     |
| In1Pd1Tb1.ICSD.640250   | metal      | metal     |
| In1Pd1Th1.ICSD.640251   | metal      | metal     |
| In1Pd1U1.ICSD.640255    | metal      | metal     |
| In1Pd1Y1.ICSD.640260    | metal      | metal     |
| In1Pd1Yb1.ICSD.415508   | metal      | metal     |
| In1Pd1.ICSD.59474       | metal      | metal     |
| In1Pd2Pr2.ICSD.54480    | metal      | metal     |
| In1Pd2Pu2.ICSD.107353   | metal      | metal     |
| In1Pd2Sc1.ICSD.59481    | metal      | metal     |
| In1Pd2Sr2.ICSD.391432   | metal      | metal     |
| In1Pd2Tb2.ICSD.658297   | metal      | metal     |
| In1Pd2Th2.ICSD.658304   | metal      | metal     |
| In1Pd2Tm1.ICSD.59483    | metal      | metal     |
| In1Pd2Tm2.ICSD.658301   | metal      | metal     |

Supplementary Table 459. Five-fold cross validated predictions for the metal/insulator classification (451/598).

| system                | calculated | predicted |
|-----------------------|------------|-----------|
| In1Pd2U2.ICSD.106867  | metal      | metal     |
| In1Pd2Y1.ICSD.59484   | metal      | metal     |
| In1Pd2Y2.ICSD.658303  | metal      | metal     |
| In1Pd2Yb2.ICSD.107347 | metal      | metal     |
| In1Pd2Zr2.ICSD.107332 | metal      | metal     |
| In1Pd2.ICSD.640234    | metal      | metal     |
| In1Pd3.ICSD.247189    | metal      | metal     |
| In1Pd3.ICSD.247195    | metal      | metal     |
| In1Pd3.ICSD.247197    | metal      | metal     |
| In1Pd3.ICSD.59476     | metal      | metal     |
| In1Pr1Pt4.ICSD.640275 | metal      | metal     |
| In1Pr1Rh1.ICSD.411076 | metal      | metal     |
| In1Pr1Zn1.ICSD.640282 | metal      | metal     |
| In1Pr1.ICSD.59487     | metal      | metal     |
| In1Pr3.ICSD.640265    | metal      | metal     |
| In1Pt1Sc1.ICSD.411459 | metal      | metal     |
| In1Pt1Sr1.ICSD.410704 | metal      | metal     |
| In1Pt1Tb1.ICSD.411458 | metal      | metal     |
| In1Pt1Th1.ICSD.640313 | metal      | metal     |
| In1Pt1Tm1.ICSD.59503  | metal      | metal     |
| In1Pt1U1.ICSD.640320  | metal      | metal     |
| In1Pt1Y1.ICSD.59504   | metal      | metal     |
| In1Pt1.ICSD.59491     | metal      | metal     |
| In1Pt2Pu2.ICSD.150162 | metal      | metal     |
| In1Pt2Sc1.ICSD.59502  | metal      | metal     |
| In1Pt2Sr2.ICSD.391433 | metal      | metal     |
| In1Pt2Tb1.ICSD.640312 | metal      | metal     |
| In1Pt2U1.ICSD.640317  | metal      | metal     |
| In1Pt2U2.ICSD.602812  | metal      | metal     |
| In1Pt2Y1.ICSD.59505   | metal      | metal     |
| In1Pt2Zr1.ICSD.59506  | metal      | metal     |
| In1Pt3.ICSD.59494     | metal      | metal     |
| In1Pt4Sm1.ICSD.640310 | metal      | metal     |
| In1Pt4Tb1.ICSD.640311 | metal      | metal     |
| In1Pt5Si1.ICSD.640309 | metal      | metal     |
| In1Pu1.ICSD.640329    | metal      | metal     |
| In1Pu2Rh2.ICSD.150163 | metal      | metal     |
| In1Pu3.ICSD.59510     | metal      | metal     |
| In1Rb1Te2.ICSD.75346  | insulator  | insulator |
| In1Rh1Sm1.ICSD.412918 | metal      | metal     |
| In1Rh1Tb1.ICSD.412917 | metal      | metal     |
| In1Rh1Tb4.ICSD.417518 | metal      | metal     |
| In1Rh1Tm1.ICSD.412914 | metal      | metal     |
| In1Rh1U1.ICSD.640340  | metal      | metal     |
| In1Rh1Y1.ICSD.59517   | metal      | metal     |
| In1Rh1Yb1.ICSD.412913 | metal      | metal     |
| In1Rh1.ICSD.640334    | metal      | metal     |
| In1Rh2U2.ICSD.106868  | metal      | metal     |
| In1Ru3.ICSD.640342    | metal      | metal     |
| In1S1.ICSD.409645     | insulator  | insulator |

Supplementary Table 460. Five-fold cross validated predictions for the metal/insulator classification (452/598).

| system                | calculated | predicted |
|-----------------------|------------|-----------|
| In1S1.ICSD.640349     | insulator  | insulator |
| In1S2Ta1.ICSD.640379  | metal      | metal     |
| In1S2Ta1.ICSD.74703   | metal      | metal     |
| In1S2Ti1.ICSD.108557  | insulator  | insulator |
| In1S2Ti1.ICSD.600748  | insulator  | insulator |
| In1S2Ti1.ICSD.600863  | insulator  | insulator |
| In1S2Ti1.ICSD.640393  | insulator  | insulator |
| In1S2Ti1.ICSD.654688  | insulator  | insulator |
| In1S2W1.ICSD.640400   | metal      | metal     |
| In1S3Sb1.ICSD.300207  | insulator  | insulator |
| In1Sb1.ICSD.10022     | metal      | metal     |
| In1Sb1.ICSD.156995    | metal      | metal     |
| In1Sb1.ICSD.157947    | metal      | metal     |
| In1Sb1.ICSD.44641     | metal      | metal     |
| In1Sb1.ICSD.44642     | metal      | metal     |
| In1Sb1.ICSD.640414    | metal      | metal     |
| In1Sb1.ICSD.640432    | metal      | metal     |
| In1Sb1.ICSD.659843    | metal      | metal     |
| In1Sc2.ICSD.59522     | metal      | metal     |
| In1Sc3.ICSD.15908     | metal      | metal     |
| In1Sc3.ICSD.59523     | metal      | metal     |
| In1Se1.ICSD.640490    | insulator  | insulator |
| In1Se1.ICSD.640503    | insulator  | insulator |
| In1Se1.ICSD.640505    | insulator  | insulator |
| In1Se1.ICSD.71083     | insulator  | insulator |
| In1Se2Ta1.ICSD.640520 | metal      | metal     |
| In1Se2Ti1.ICSD.600818 | insulator  | insulator |
| In1Se2Ti1.ICSD.640528 | metal      | insulator |
| In1Si1Te3.ICSD.657680 | insulator  | insulator |
| In1Si1Te3.ICSD.66356  | metal      | insulator |
| In1Sm1.ICSD.59525     | metal      | metal     |
| In1Sm2.ICSD.59526     | metal      | metal     |
| In1Sm3.ICSD.640543    | metal      | metal     |
| In1Sm3.ICSD.640546    | metal      | metal     |
| In1Sr3.ICSD.59542     | metal      | metal     |
| In1Tb2.ICSD.59544     | metal      | metal     |
| In1Te1.ICSD.169421    | metal      | metal     |
| In1Te1.ICSD.169431    | metal      | metal     |
| In1Te1.ICSD.44652     | metal      | metal     |
| In1Te2Ti1.ICSD.600697 | insulator  | insulator |
| In1Th1.ICSD.102123    | metal      | metal     |
| In1Th2.ICSD.59549     | metal      | metal     |
| In1Ti2.ICSD.189702    | metal      | metal     |
| In1Ti3.ICSD.189701    | metal      | metal     |
| In1Tm1.ICSD.59561     | metal      | metal     |
| In1Tm2.ICSD.59562     | metal      | metal     |
| In1Y1.ICSD.640692     | metal      | metal     |
| In1Y2.ICSD.108567     | metal      | metal     |
| In1Yb1Zn1.ICSD.640716 | metal      | metal     |
| In1Yb1.ICSD.640702    | metal      | metal     |

Supplementary Table 461. Five-fold cross validated predictions for the metal/insulator classification (453/598).

| system                   | calculated | predicted |
|--------------------------|------------|-----------|
| In1Yb2.ICSD.59571        | metal      | metal     |
| In1Zr3.ICSD.640717       | metal      | metal     |
| In1.ICSD.53777           | metal      | metal     |
| In24S32.ICSD.640361      | metal      | insulator |
| In2Ir1La1.ICSD.414479    | metal      | metal     |
| In2Ir1Li1.ICSD.106798    | metal      | metal     |
| In2Ir1Sr1.ICSD.410401    | metal      | metal     |
| In2La1Ni9.ICSD.600218    | metal      | metal     |
| In2La1Pd1.ICSD.413448    | metal      | metal     |
| In2La1Rh1.ICSD.412431    | metal      | metal     |
| In2La1.ICSD.51951        | metal      | metal     |
| In2Li1Pd1.ICSD.106803    | metal      | metal     |
| In2Li1Pt1.ICSD.106804    | metal      | metal     |
| In2Li1Rh1.ICSD.106806    | metal      | metal     |
| In2Li1Ru1.ICSD.639896    | metal      | metal     |
| In2Li2S6Si1.ICSD.262642  | insulator  | insulator |
| In2Li2Se6Si1.ICSD.262644 | insulator  | insulator |
| In2Li3.ICSD.10051        | metal      | metal     |
| In2Mg1O4.ICSD.157770     | insulator  | insulator |
| In2Mg1S4.ICSD.53096      | insulator  | insulator |
| In2Mg1.ICSD.423608       | metal      | metal     |
| In2Mg5.ICSD.109097       | metal      | metal     |
| In2Mn1S4.ICSD.639973     | insulator  | insulator |
| In2Mn1Se4.ICSD.639980    | metal      | insulator |
| In2Mn1Te4.ICSD.60053     | insulator  | metal     |
| In2Mn1Te4.ICSD.639984    | insulator  | insulator |
| In2Mn2O7.ICSD.56517      | insulator  | metal     |
| In2Na6S6.ICSD.300165     | insulator  | insulator |
| In2Ni1S4.ICSD.640128     | metal      | insulator |
| In2Ni1Tb1.ICSD.59450     | metal      | metal     |
| In2Ni1Y1.ICSD.59457      | metal      | metal     |
| In2Ni1Yb1.ICSD.414077    | metal      | metal     |
| In2Ni21P6.ICSD.68998     | metal      | metal     |
| In2Ni3S2.ICSD.640135     | metal      | metal     |
| In2Ni3Se2.ICSD.640141    | metal      | metal     |
| In2Ni9Tb1.ICSD.600180    | metal      | metal     |
| In2Ni9Y1.ICSD.59458      | metal      | metal     |
| In2O3.ICSD.169429        | insulator  | insulator |
| In2O3.ICSD.181834        | insulator  | insulator |
| In2O3.ICSD.181836        | insulator  | insulator |
| In2O3.ICSD.24325         | insulator  | insulator |
| In2O5P1.ICSD.413858      | insulator  | insulator |
| In2O5V1.ICSD.417999      | metal      | insulator |
| In2O6Te1.ICSD.60260      | insulator  | insulator |
| In2O7Si2.ICSD.1458       | insulator  | insulator |
| In2O7Si2.ICSD.74897      | insulator  | insulator |
| In2P2Sr1.ICSD.260563     | insulator  | insulator |
| In2P4Sr3.ICSD.61335      | insulator  | insulator |
| In2Pb1S4.ICSD.100687     | insulator  | insulator |
| In2Pd1Sr1.ICSD.410402    | metal      | metal     |

Supplementary Table 462. Five-fold cross validated predictions for the metal/insulator classification (454/598).

| system                | calculated | predicted |
|-----------------------|------------|-----------|
| In2Pd1Yb1_ICSD_410437 | metal      | metal     |
| In2Pt1Sr1_ICSD_410400 | metal      | metal     |
| In2Pt1Yb1_ICSD_424100 | metal      | metal     |
| In2Pt1_ICSD_640307    | metal      | metal     |
| In2Pt3_ICSD_59498     | metal      | metal     |
| In2Rb4S5_ICSD_23253   | insulator  | insulator |
| In2Rb6S6_ICSD_23252   | insulator  | insulator |
| In2Rh1Sm1_ICSD_412430 | metal      | metal     |
| In2Rh1Sr1_ICSD_410403 | metal      | metal     |
| In2Rh1Yb1_ICSD_152048 | metal      | metal     |
| In2Rh3S2_ICSD_640339  | metal      | metal     |
| In2S3_ICSD_12148      | insulator  | insulator |
| In2S3_ICSD_23844      | insulator  | insulator |
| In2S4Zn1_ICSD_16200   | insulator  | metal     |
| In2S4Zn1_ICSD_42668   | metal      | insulator |
| In2S4Zn1_ICSD_44637   | insulator  | insulator |
| In2S4Zn1_ICSD_603024  | insulator  | metal     |
| In2S4Zn1_ICSD_81811   | insulator  | insulator |
| In2S5Zn2_ICSD_42443   | metal      | insulator |
| In2S5Zn2_ICSD_42666   | metal      | insulator |
| In2S6Zn3_ICSD_655835  | metal      | insulator |
| In2S7Sn3_ICSD_68366   | insulator  | insulator |
| In2Sb6Sr5_ICSD_36468  | insulator  | metal     |
| In2Sb6Yb5_ICSD_91336  | metal      | metal     |
| In2Se1_ICSD_44646     | metal      | insulator |
| In2Se3_ICSD_108563    | insulator  | insulator |
| In2Se3_ICSD_1376      | insulator  | insulator |
| In2Se3_ICSD_17008     | metal      | metal     |
| In2Se3_ICSD_602266    | insulator  | insulator |
| In2Se3_ICSD_640489    | metal      | metal     |
| In2Se4Yb1_ICSD_640533 | insulator  | insulator |
| In2Se4Zn1_ICSD_25647  | insulator  | insulator |
| In2Sr1Te4_ICSD_41167  | insulator  | insulator |
| In2Sr1_ICSD_59543     | metal      | metal     |
| In2Te1_ICSD_640618    | metal      | metal     |
| In2Te3_ICSD_44364     | metal      | insulator |
| In2Te3_ICSD_640609    | metal      | metal     |
| In2Te4Zn1_ICSD_25650  | insulator  | insulator |
| In2Te5_ICSD_640615    | insulator  | insulator |
| In2Yb1_ICSD_59572     | metal      | metal     |
| In3Ir1_ICSD_240201    | metal      | metal     |
| In3Ir1_ICSD_639819    | metal      | metal     |
| In3La1_ICSD_639843    | metal      | metal     |
| In3Li13_ICSD_51963    | metal      | metal     |
| In3Lu1_ICSD_639910    | metal      | metal     |
| In3Mg1Sr1_ICSD_249592 | metal      | metal     |
| In3Mg1_ICSD_51978     | metal      | metal     |
| In3Na7Se8_ICSD_300178 | insulator  | insulator |
| In3Nd1_ICSD_640065    | metal      | metal     |
| In3Ni2_ICSD_640116    | metal      | metal     |

Supplementary Table 463. Five-fold cross validated predictions for the metal/insulator classification (455/598).

| system                | calculated | predicted |
|-----------------------|------------|-----------|
| In3O12Sb5_ICSD_68240  | insulator  | insulator |
| In3O8P2_ICSD_66831    | insulator  | insulator |
| In3Pd2_ICSD_59478     | metal      | metal     |
| In3Pd5_ICSD_417906    | metal      | metal     |
| In3Pr1_ICSD_59489     | metal      | metal     |
| In3Pr1_ICSD_640267    | metal      | metal     |
| In3Pt2_ICSD_640301    | metal      | metal     |
| In3Pu1_ICSD_640330    | metal      | metal     |
| In3Rb1S5_ICSD_59667   | insulator  | insulator |
| In3Rb2_ICSD_370026    | metal      | metal     |
| In3Rh1_ICSD_407549    | metal      | metal     |
| In3Rh2Sr2_ICSD_410985 | metal      | metal     |
| In3Rh2Ti3_ICSD_410967 | metal      | metal     |
| In3Ru1_ICSD_59518     | insulator  | metal     |
| In3Ru1_ICSD_640343    | insulator  | metal     |
| In3S5Ti1_ICSD_402124  | insulator  | insulator |
| In3Sc1_ICSD_640463    | metal      | metal     |
| In3Sm1_ICSD_59529     | metal      | metal     |
| In3Sr1_ICSD_640581    | metal      | metal     |
| In3Sr5_ICSD_413805    | metal      | metal     |
| In3Tb1_ICSD_640594    | metal      | metal     |
| In3Te4_ICSD_44655     | metal      | metal     |
| In3Th1_ICSD_640646    | metal      | metal     |
| In3Tm1_ICSD_640670    | metal      | metal     |
| In3Tm1_ICSD_640675    | metal      | metal     |
| In3Tm1_ICSD_640678    | metal      | metal     |
| In3U1_ICSD_640683     | metal      | metal     |
| In3Y1_ICSD_59568      | metal      | metal     |
| In3Yb1_ICSD_640714    | metal      | metal     |
| In3Zr1_ICSD_59578     | metal      | metal     |
| In4Ir1Sr1_ICSD_417836 | metal      | metal     |
| In4K1_ICSD_51947      | metal      | metal     |
| In4La1Ni1_ICSD_411746 | metal      | metal     |
| In4Li5_ICSD_639879    | metal      | metal     |
| In4Ni1Sr1_ICSD_418178 | metal      | metal     |
| In4Ni1Yb1_ICSD_640172 | metal      | metal     |
| In4Ni2Sc5_ICSD_414505 | metal      | metal     |
| In4O7Rb2_ICSD_6321    | insulator  | insulator |
| In4P8Rb12_ICSD_402811 | insulator  | insulator |
| In4Pd1Sr1_ICSD_418179 | metal      | metal     |
| In4Pd1Yb1_ICSD_411398 | metal      | metal     |
| In4Pt1Sr1_ICSD_418180 | metal      | metal     |
| In4Pt1Yb1_ICSD_412908 | metal      | metal     |
| In4Rb1_ICSD_59514     | metal      | metal     |
| In4Rh1Yb1_ICSD_411393 | metal      | metal     |
| In4Rh2Sc5_ICSD_414506 | metal      | metal     |
| In4S4Sn1_ICSD_36513   | insulator  | insulator |
| In4Se3_ICSD_425490    | insulator  | insulator |
| In4Se4Sn1_ICSD_56324  | insulator  | insulator |
| In4Sr1_ICSD_240131    | metal      | metal     |

Supplementary Table 464. Five-fold cross validated predictions for the metal/insulator classification (456/598).

| system                | calculated | predicted |
|-----------------------|------------|-----------|
| In4Sr1_ICSD_240135    | metal      | metal     |
| In4Te3_ICSD_79121     | insulator  | metal     |
| In4Ti3_ICSD_59553     | metal      | metal     |
| In5Ir1La1_ICSD_150266 | metal      | metal     |
| In5Ir1Pr1_ICSD_246916 | metal      | metal     |
| In5Ir1Yb1_ICSD_413163 | metal      | metal     |
| In5K1S8_ICSD_40875    | insulator  | insulator |
| In5La1Rh1_ICSD_150265 | metal      | metal     |
| In5La4S13_ICSD_20381  | metal      | insulator |
| In5Na24O15_ICSD_63570 | metal      | insulator |
| In5Nd1Rh1_ICSD_155802 | metal      | metal     |
| In5Pr1Rh1_ICSD_246915 | metal      | metal     |
| In5Rb1S8_ICSD_40877   | insulator  | insulator |
| In5Rh1Tb1_ICSD_155803 | metal      | metal     |
| In5Rh1Yb1_ICSD_412909 | metal      | metal     |
| In5S6Ti1_ICSD_56388   | insulator  | insulator |
| In5S7Ti1_ICSD_402125  | insulator  | insulator |
| In5Sb3_ICSD_640434    | metal      | metal     |
| In5Se7Ti1_ICSD_402126 | insulator  | insulator |
| In5Tb3_ICSD_640589    | metal      | metal     |
| In5Th3_ICSD_59552     | metal      | metal     |
| In5Ti2_ICSD_401730    | metal      | metal     |
| In5Ti8_ICSD_240166    | metal      | metal     |
| In5Y3_ICSD_165364     | metal      | metal     |
| In6O12Re1_ICSD_245005 | insulator  | insulator |
| In6O12Te1_ICSD_245526 | insulator  | insulator |
| In6O12W1_ICSD_27197   | insulator  | insulator |
| In6S7_ICSD_640348     | insulator  | insulator |
| In6Se7_ICSD_640500    | insulator  | insulator |
| In6Se7_ICSD_9135      | insulator  | insulator |
| In7Pd3_ICSD_408314    | metal      | metal     |
| In7Pt3_ICSD_409596    | metal      | metal     |
| In7Sr11_ICSD_159151   | metal      | metal     |
| In7Te10_ICSD_400669   | insulator  | insulator |
| In8Ir1Yb2_ICSD_414480 | metal      | metal     |
| In8N7Sr19_ICSD_155930 | metal      | metal     |
| In8Nd2Pd1_ICSD_180117 | metal      | metal     |
| In8Pd1Pr2_ICSD_180116 | metal      | metal     |
| In9K1Ni2_ICSD_260252  | metal      | metal     |
| In9Ni13_ICSD_154798   | metal      | metal     |
| In9Pt13_ICSD_59501    | metal      | metal     |
| Ir13Sc57_ICSD_600485  | metal      | metal     |
| Ir1K0.25O2_ICSD_80336 | metal      | metal     |
| Ir1K1Li6O6_ICSD_61692 | metal      | insulator |
| Ir1K1O3_ICSD_4200     | metal      | insulator |
| Ir1K3Li1O4_ICSD_75045 | insulator  | insulator |
| Ir1K3N6O12_ICSD_28638 | metal      | metal     |
| Ir1K4O4_ICSD_47223    | insulator  | insulator |
| Ir1La1P1_ICSD_414514  | metal      | metal     |
| Ir1La1Si1_ICSD_640758 | metal      | metal     |

Supplementary Table 465. Five-fold cross validated predictions for the metal/insulator classification (457/598).

| system                  | calculated | predicted |
|-------------------------|------------|-----------|
| Ir1La1Si3_ICSD_38342    | metal      | metal     |
| Ir1La3O7_ICSD_181572    | insulator  | insulator |
| Ir1La3_ICSD_603213      | metal      | metal     |
| Ir1La4Mg1_ICSD_418746   | metal      | metal     |
| Ir1Li1O6Pr2_ICSD_414149 | metal      | insulator |
| Ir1Li1O6Sr3_ICSD_81905  | metal      | insulator |
| Ir1Li1Sn4_ICSD_412252   | metal      | metal     |
| Ir1Li1_ICSD_104487      | metal      | metal     |
| Ir1Li2Mg1_ICSD_180120   | metal      | metal     |
| Ir1Li2Sn1_ICSD_640769   | metal      | metal     |
| Ir1Li8O6_ICSD_61217     | insulator  | insulator |
| Ir1Lu1Si1_ICSD_413857   | metal      | metal     |
| Ir1Lu1Sn1_ICSD_640793   | metal      | metal     |
| Ir1Lu1_ICSD_640773      | metal      | metal     |
| Ir1Mg1O6Sr2_ICSD_77835  | insulator  | metal     |
| Ir1Mg1O6Sr3_ICSD_84737  | metal      | insulator |
| Ir1Mg1Tb4_ICSD_418743   | metal      | metal     |
| Ir1Mg3_ICSD_104494      | metal      | metal     |
| Ir1Mg3_ICSD_106871      | metal      | metal     |
| Ir1Mn1Sb1_ICSD_44660    | metal      | metal     |
| Ir1Mn1Si1_ICSD_246548   | metal      | metal     |
| Ir1Mn1Sn1_ICSD_104498   | metal      | metal     |
| Ir1Mn1_ICSD_104496      | metal      | metal     |
| Ir1Mn3N1_ICSD_44659     | metal      | metal     |
| Ir1Mn3Si1_ICSD_151748   | metal      | metal     |
| Ir1Mo1_ICSD_104499      | metal      | metal     |
| Ir1Mo3_ICSD_640823      | metal      | metal     |
| Ir1N1_ICSD_167880       | metal      | metal     |
| Ir1N1_ICSD_183155       | metal      | metal     |
| Ir1N1_ICSD_186241       | metal      | metal     |
| Ir1N1_ICSD_186244       | metal      | metal     |
| Ir1N1_ICSD_186245       | metal      | metal     |
| Ir1N1_ICSD_187717       | metal      | metal     |
| Ir1N1_ICSD_187719       | metal      | metal     |
| Ir1N2_ICSD_240755       | insulator  | metal     |
| Ir1N2_ICSD_240756       | metal      | metal     |
| Ir1N2_ICSD_290442       | metal      | metal     |
| Ir1N2_ICSD_290443       | metal      | metal     |
| Ir1N2_ICSD_290444       | metal      | metal     |
| Ir1N6Na3O12_ICSD_39572  | insulator  | insulator |
| Ir1N6O12Rb3_ICSD_28639  | metal      | metal     |
| Ir1N6O12Ti3_ICSD_28641  | metal      | metal     |
| Ir1Na1O3_ICSD_261371    | metal      | metal     |
| Ir1Na1O6Sr3_ICSD_81906  | metal      | metal     |
| Ir1Na2O3_ICSD_187130    | metal      | insulator |
| Ir1Na4O4_ICSD_67826     | insulator  | insulator |
| Ir1Nb1Si1_ICSD_411882   | metal      | metal     |
| Ir1Nb1Te4_ICSD_656451   | metal      | metal     |
| Ir1Nb1_ICSD_104510      | metal      | metal     |
| Ir1Nb1_ICSD_640828      | metal      | metal     |

Supplementary Table 466. Five-fold cross validated predictions for the metal/insulator classification (458/598).

| system                 | calculated | predicted |
|------------------------|------------|-----------|
| Ir1Nb3.ICSD.640833     | metal      | metal     |
| Ir1Nd1P1.ICSD.414517   | metal      | metal     |
| Ir1Nd1Si1.ICSD.640874  | metal      | metal     |
| Ir1Nd1Si3.ICSD.640872  | metal      | metal     |
| Ir1Ni1O6Sr3.ICSD.80285 | insulator  | insulator |
| Ir1O2.ICSD.640883      | metal      | metal     |
| Ir1O4Sr2.ICSD.45974    | metal      | metal     |
| Ir1O6Sr2Tb1.ICSD.90497 | metal      | insulator |
| Ir1O6Sr3Zn1.ICSD.82660 | insulator  | insulator |
| Ir1O6Sr4.ICSD.72926    | metal      | metal     |
| Ir1O7Pr3.ICSD.86473    | insulator  | insulator |
| Ir1O9P3.ICSD.419717    | insulator  | insulator |
| Ir1P1Pr1.ICSD.414516   | metal      | metal     |
| Ir1P1Sc1.ICSD.422403   | metal      | metal     |
| Ir1P1Se1.ICSD.640901   | insulator  | insulator |
| Ir1P1Sr1.ICSD.155712   | metal      | metal     |
| Ir1P1Te1.ICSD.601289   | insulator  | insulator |
| Ir1P2.ICSD.174231      | insulator  | insulator |
| Ir1P3.ICSD.640899      | metal      | metal     |
| Ir1Pb1.ICSD.104538     | metal      | metal     |
| Ir1Pt4U1.ICSD.640921   | metal      | metal     |
| Ir1S1Sb1.ICSD.41400    | insulator  | insulator |
| Ir1S1Sb1.ICSD.74630    | insulator  | insulator |
| Ir1S2.ICSD.640949      | metal      | insulator |
| Ir1S2.ICSD.640950      | insulator  | insulator |
| Ir1Sb1Se1.ICSD.640966  | insulator  | insulator |
| Ir1Sb1Sm1.ICSD.51843   | metal      | metal     |
| Ir1Sb1Te1.ICSD.640967  | insulator  | insulator |
| Ir1Sb1Yb1.ICSD.422623  | metal      | metal     |
| Ir1Sb1.ICSD.44481      | metal      | metal     |
| Ir1Sb2.ICSD.43502      | insulator  | metal     |
| Ir1Sb3.ICSD.640958     | metal      | metal     |
| Ir1Sc1Si1.ICSD.420416  | metal      | metal     |
| Ir1Sc1.ICSD.104557     | metal      | metal     |
| Ir1Sc2.ICSD.657999     | metal      | metal     |
| Ir1Sc3Si3.ICSD.421256  | metal      | metal     |
| Ir1Se2.ICSD.640985     | insulator  | metal     |
| Ir1Si1Ta1.ICSD.411884  | metal      | metal     |
| Ir1Si1Tb1.ICSD.93217   | metal      | metal     |
| Ir1Si1Ti1.ICSD.641017  | metal      | metal     |
| Ir1Si1U1.ICSD.44665    | metal      | metal     |
| Ir1Si1Y1.ICSD.641028   | metal      | metal     |
| Ir1Si1Yb1.ICSD.411736  | metal      | metal     |
| Ir1Si1Zr1.ICSD.641044  | metal      | metal     |
| Ir1Si1.ICSD.57397      | metal      | metal     |
| Ir1Si3Sm1.ICSD.641004  | metal      | metal     |
| Ir1Si3Tb1.ICSD.641008  | metal      | metal     |
| Ir1Si3Th1.ICSD.641014  | metal      | metal     |
| Ir1Si3U1.ICSD.641022   | metal      | metal     |
| Ir1Si3Y1.ICSD.641038   | metal      | metal     |

Supplementary Table 467. Five-fold cross validated predictions for the metal/insulator classification (459/598).

| system                | calculated | predicted |
|-----------------------|------------|-----------|
| Ir1Si3.ICSD.26218     | metal      | metal     |
| Ir1Si3.ICSD.43418     | metal      | metal     |
| Ir1Sn1U1.ICSD.641059  | metal      | metal     |
| Ir1Sn1Yb1.ICSD.641062 | metal      | metal     |
| Ir1Sn1Zr1.ICSD.104563 | metal      | metal     |
| Ir1Sn1Zr1.ICSD.107470 | metal      | metal     |
| Ir1Sn1.ICSD.641051    | metal      | metal     |
| Ir1Sn2.ICSD.641054    | metal      | metal     |
| Ir1Sn4.ICSD.641053    | metal      | metal     |
| Ir1Ta1Te4.ICSD.73322  | metal      | metal     |
| Ir1Ta1.ICSD.641067    | metal      | metal     |
| Ir1Tb3.ICSD.641077    | metal      | metal     |
| Ir1Te1.ICSD.44870     | metal      | metal     |
| Ir1Te2.ICSD.189404    | metal      | metal     |
| Ir1Te2.ICSD.90086     | metal      | metal     |
| Ir1Te2.ICSD.93891     | metal      | metal     |
| Ir1Te2.ICSD.93893     | metal      | metal     |
| Ir1Te2.ICSD.93894     | metal      | metal     |
| Ir1Te2.ICSD.93895     | metal      | metal     |
| Ir1Te2.ICSD.93896     | metal      | metal     |
| Ir1Th1.ICSD.641097    | metal      | metal     |
| Ir1Ti1.ICSD.182146    | metal      | metal     |
| Ir1Ti1.ICSD.188188    | metal      | metal     |
| Ir1Ti3.ICSD.50296     | metal      | metal     |
| Ir1Tl3.ICSD.186645    | metal      | metal     |
| Ir1Tm1.ICSD.104580    | metal      | metal     |
| Ir1U1.ICSD.104582     | metal      | metal     |
| Ir1U1.ICSD.104583     | metal      | metal     |
| Ir1V1.ICSD.169384     | metal      | metal     |
| Ir1V1.ICSD.169387     | metal      | metal     |
| Ir1V1.ICSD.169390     | metal      | metal     |
| Ir1V1.ICSD.169393     | metal      | metal     |
| Ir1V3.ICSD.641151     | metal      | metal     |
| Ir1W1.ICSD.104596     | metal      | metal     |
| Ir1Y1.ICSD.104600     | metal      | metal     |
| Ir1Y3.ICSD.641173     | metal      | metal     |
| Ir1Yb1.ICSD.104603    | metal      | metal     |
| Ir1Zr1.ICSD.104606    | metal      | metal     |
| Ir1Zr1.ICSD.657956    | metal      | metal     |
| Ir1Zr2.ICSD.641204    | metal      | metal     |
| Ir1Zr2.ICSD.641208    | metal      | metal     |
| Ir1Zr3.ICSD.104607    | metal      | metal     |
| Ir1.ICSD.64992        | metal      | metal     |
| Ir2La1Si2.ICSD.188327 | metal      | metal     |
| Ir2La1Si2.ICSD.604622 | metal      | metal     |
| Ir2La1.ICSD.640736    | metal      | metal     |
| Ir2La5.ICSD.640756    | metal      | metal     |
| Ir2Lu1.ICSD.104491    | metal      | metal     |
| Ir2Lu5.ICSD.104493    | metal      | metal     |
| Ir2Mg1.ICSD.414084    | metal      | metal     |

Supplementary Table 468. Five-fold cross validated predictions for the metal/insulator classification (460/598).

| system                | calculated | predicted |
|-----------------------|------------|-----------|
| Ir2N1Zr4.ICSD_640826  | metal      | metal     |
| Ir2Nd1Si2.ICSD_640868 | metal      | metal     |
| Ir2Nd1Si2.ICSD_640869 | metal      | metal     |
| Ir2Nd1Si2.ICSD_640870 | metal      | metal     |
| Ir2Nd1Si2.ICSD_640871 | metal      | metal     |
| Ir2Nd1.ICSD_640859    | metal      | metal     |
| Ir2O7Pr2.ICSD_156436  | metal      | metal     |
| Ir2O7Y2.ICSD_187534   | metal      | metal     |
| Ir2P1.ICSD_640898     | metal      | metal     |
| Ir2P2Sm1.ICSD_186991  | metal      | metal     |
| Ir2P2Sr1.ICSD_73531   | insulator  | insulator |
| Ir2Pr1.ICSD_104541    | metal      | metal     |
| Ir2Pu1Si2.ICSD_73039  | metal      | metal     |
| Ir2Pu1.ICSD_104544    | metal      | metal     |
| Ir2S3Sn3.ICSD_640953  | metal      | metal     |
| Ir2S3.ICSD_640948     | insulator  | insulator |
| Ir2Sc1.ICSD_104559    | metal      | metal     |
| Ir2Si1.ICSD_640995    | metal      | metal     |
| Ir2Si2Sm1.ICSD_641000 | metal      | metal     |
| Ir2Si2Sm1.ICSD_641003 | metal      | metal     |
| Ir2Si2Sm3.ICSD_411734 | metal      | metal     |
| Ir2Si2Tb1.ICSD_55762  | metal      | metal     |
| Ir2Si2Tb1.ICSD_604511 | metal      | metal     |
| Ir2Si2Th1.ICSD_603978 | metal      | metal     |
| Ir2Si2Th1.ICSD_641012 | metal      | metal     |
| Ir2Si2U1.ICSD_44666   | metal      | metal     |
| Ir2Si2U1.ICSD_62716   | metal      | metal     |
| Ir2Si2Y1.ICSD_181769  | metal      | metal     |
| Ir2Si2Y1.ICSD_641030  | metal      | metal     |
| Ir2Si2Y1.ICSD_641036  | metal      | metal     |
| Ir2Sr1.ICSD_104564    | metal      | metal     |
| Ir2Tb1.ICSD_104569    | metal      | metal     |
| Ir2Tb5.ICSD_641079    | metal      | metal     |
| Ir2Th1.ICSD_641102    | metal      | metal     |
| Ir2Tm1.ICSD_104581    | metal      | metal     |
| Ir2U1Zn20.ICSD_183636 | metal      | metal     |
| Ir2U1.ICSD_641143     | metal      | metal     |
| Ir2Y1.ICSD_641180     | metal      | metal     |
| Ir2Y5.ICSD_641177     | metal      | metal     |
| Ir2Yb1.ICSD_104604    | metal      | metal     |
| Ir2Zn11.ICSD_104605   | metal      | metal     |
| Ir2Zr1.ICSD_104608    | metal      | metal     |
| Ir3La1.ICSD_640746    | metal      | metal     |
| Ir3La2Sb4.ICSD_423170 | metal      | metal     |
| Ir3La3O11.ICSD_200472 | metal      | metal     |
| Ir3La5.ICSD_640734    | metal      | metal     |
| Ir3La7.ICSD_640737    | metal      | metal     |
| Ir3Li1.ICSD_104488    | metal      | metal     |
| Ir3Mg13.ICSD_413721   | metal      | metal     |
| Ir3Mg1Si7.ICSD_249150 | metal      | metal     |

Supplementary Table 469. Five-fold cross validated predictions for the metal/insulator classification (461/598).

| system                 | calculated | predicted |
|------------------------|------------|-----------|
| Ir3Mg3Si8.ICSD_416868  | metal      | metal     |
| Ir3Mo1.ICSD_104506     | metal      | metal     |
| Ir3Nb1.ICSD_104515     | metal      | metal     |
| Ir3Nd1.ICSD_640856     | metal      | metal     |
| Ir3Pa1.ICSD_104537     | metal      | metal     |
| Ir3Pu5.ICSD_978        | metal      | metal     |
| Ir3S8.ICSD_640951      | metal      | metal     |
| Ir3Sb4U3.ICSD_640968   | metal      | metal     |
| Ir3Sc1Si7.ICSD_15244   | metal      | metal     |
| Ir3Sc1.ICSD_108568     | metal      | metal     |
| Ir3Se8.ICSD_40823      | metal      | metal     |
| Ir3Si1.ICSD_54975      | metal      | metal     |
| Ir3Si4.ICSD_42731      | metal      | metal     |
| Ir3Si5Y2.ICSD_641029   | metal      | metal     |
| Ir3Sn7.ICSD_150762     | metal      | metal     |
| Ir3Ta1.ICSD_641074     | metal      | metal     |
| Ir3Tb5.ICSD_641080     | metal      | metal     |
| Ir3Tb5.ICSD_641082     | metal      | metal     |
| Ir3Th7.ICSD_641096     | metal      | metal     |
| Ir3Ti1.ICSD_641129     | metal      | metal     |
| Ir3U1.ICSD_104588      | metal      | metal     |
| Ir3V1.ICSD_641154      | metal      | metal     |
| Ir3W1.ICSD_641166      | metal      | metal     |
| Ir3Y1.ICSD_641184      | metal      | metal     |
| Ir3Y5.ICSD_641178      | metal      | metal     |
| Ir3Y5.ICSD_641185      | metal      | metal     |
| Ir3Yb5.ICSD_641190     | metal      | metal     |
| Ir3Yb5.ICSD_641191     | metal      | metal     |
| Ir3Zr1.ICSD_641206     | metal      | metal     |
| Ir3Zr5.ICSD_641203     | metal      | metal     |
| Ir4La3Sn13.ICSD_603036 | metal      | metal     |
| Ir4Lu3Si13.ICSD_600538 | metal      | metal     |
| Ir4Lu5Si10.ICSD_168655 | metal      | metal     |
| Ir4Mg29.ICSD_55515     | metal      | metal     |
| Ir4Nd3Sn13.ICSD_603091 | metal      | metal     |
| Ir4Pr3Sn13.ICSD_603090 | metal      | metal     |
| Ir4Pr3Sn13.ICSD_640916 | metal      | metal     |
| Ir4Sc11.ICSD_10438     | metal      | metal     |
| Ir4Sc5Si10.ICSD_640980 | metal      | metal     |
| Ir4Si10Y5.ICSD_641033  | metal      | metal     |
| Ir4Sm3Sn13.ICSD_603092 | metal      | metal     |
| Ir4Sn13Sr3.ICSD_641056 | metal      | metal     |
| Ir4Sn13Yb3.ICSD_641063 | metal      | metal     |
| Ir4Sn4Sr3.ICSD_410992  | metal      | metal     |
| Ir5La1.ICSD_640740     | metal      | metal     |
| Ir5Nd1.ICSD_104521     | metal      | metal     |
| Ir5Sn7.ICSD_76912      | metal      | metal     |
| Ir5Th1.ICSD_641108     | metal      | metal     |
| Ir7La2.ICSD_640739     | metal      | metal     |
| Ir7Mg44.ICSD_104495    | metal      | metal     |

Supplementary Table 470. Five-fold cross validated predictions for the metal/insulator classification (462/598).

| system                       | calculated | predicted |
|------------------------------|------------|-----------|
| Ir7Sc4Si6.ICSD.640978        | metal      | metal     |
| K0.33Mo1O3.ICSD.1053         | insulator  | insulator |
| K1.33Na0.67O5Si2.ICSD.170786 | insulator  | insulator |
| K10Pb48.ICSD.410090          | metal      | metal     |
| K19.194.ICSD.157569          | metal      | metal     |
| K19.206.ICSD.157567          | metal      | metal     |
| K19.214.ICSD.157564          | metal      | metal     |
| K1La1Na1Nb1O5.ICSD.94743     | insulator  | insulator |
| K1La1Na1O5Ta1.ICSD.419855    | insulator  | insulator |
| K1La1O12P4.ICSD.161016       | insulator  | insulator |
| K1La1O12P4.ICSD.33241        | insulator  | insulator |
| K1La1O2.ICSD.27001           | insulator  | insulator |
| K1La1O3Pd1.ICSD.417108       | insulator  | insulator |
| K1La1O4Ti1.ICSD.261365       | insulator  | insulator |
| K1La1S2.ICSD.44942           | insulator  | insulator |
| K1La1S4Si1.ICSD.414544       | insulator  | insulator |
| K1La1S4Si1.ICSD.603184       | insulator  | insulator |
| K1La1Se4Si1.ICSD.603185      | insulator  | insulator |
| K1La1Te2.ICSD.98654          | insulator  | insulator |
| K1La2Nb1O6.ICSD.160450       | insulator  | insulator |
| K1Li1Mn1O2.ICSD.49021        | insulator  | insulator |
| K1Li1O1.ICSD.30964           | insulator  | insulator |
| K1Li1O2Zn1.ICSD.49022        | insulator  | insulator |
| K1Li1O4S1.ICSD.56106         | insulator  | insulator |
| K1Li1O4S1.ICSD.71365         | insulator  | insulator |
| K1Li1O4S1.ICSD.71366         | insulator  | insulator |
| K1Li1O4S1.ICSD.71367         | insulator  | insulator |
| K1Li1O4S1.ICSD.88832         | insulator  | insulator |
| K1Li1O5Si2.ICSD.82457        | insulator  | insulator |
| K1Li1S1.ICSD.290450          | insulator  | insulator |
| K1Li1Se1.ICSD.290451         | insulator  | insulator |
| K1Li1Te1.ICSD.290452         | insulator  | insulator |
| K1Li4Nb1O5.ICSD.73124        | insulator  | insulator |
| K1Li6O6Ta1.ICSD.73159        | insulator  | insulator |
| K1Lu1O8W2.ICSD.155155        | insulator  | insulator |
| K1Mg1O9P3.ICSD.28012         | insulator  | insulator |
| K1Mg1P1.ICSD.641231          | insulator  | insulator |
| K1Mn1Na1O2.ICSD.61403        | insulator  | insulator |
| K1Mn1O4P1.ICSD.78840         | insulator  | insulator |
| K1Mn1O4.ICSD.44625           | insulator  | insulator |
| K1Mn1O8Se2.ICSD.80430        | insulator  | insulator |
| K1Mn1Sb1.ICSD.602269         | insulator  | metal     |
| K1Mn1Te2.ICSD.87983          | metal      | metal     |
| K1Mo12S14.ICSD.171363        | metal      | metal     |
| K1Mo2O8Sc1.ICSD.28019        | insulator  | insulator |
| K1Mo2O8Y1.ICSD.20478         | insulator  | insulator |
| K1Mo3S3.ICSD.30752           | metal      | metal     |
| K1Mo3Se3.ICSD.604517         | metal      | metal     |
| K1Mo3Te3.ICSD.604500         | metal      | metal     |
| K1Mo4O6.ICSD.68533           | metal      | metal     |

Supplementary Table 471. Five-fold cross validated predictions for the metal/insulator classification (463/598).

| system                    | calculated | predicted |
|---------------------------|------------|-----------|
| K1Mo4O6.ICSD.73807        | metal      | metal     |
| K1Mo6S8.ICSD.641241       | metal      | metal     |
| K1N1O2.ICSD.26764         | metal      | insulator |
| K1N1O2.ICSD.36202         | insulator  | insulator |
| K1N1O2.ICSD.86117         | insulator  | insulator |
| K1N1O3.ICSD.28077         | insulator  | insulator |
| K1N1O3.ICSD.71398         | insulator  | insulator |
| K1N1.ICSD.184991          | metal      | metal     |
| K1N3.ICSD.1145            | metal      | insulator |
| K1N3.ICSD.155168          | insulator  | insulator |
| K1Na1Nb1Nd1O5.ICSD.420038 | insulator  | insulator |
| K1Na1Nb1O5Pr1.ICSD.420039 | insulator  | insulator |
| K1Na1Nd1O5Ta1.ICSD.419856 | insulator  | insulator |
| K1Na1O1.ICSD.32743        | insulator  | insulator |
| K1Na1O2Zn1.ICSD.38327     | insulator  | insulator |
| K1Na1O3Ti1.ICSD.47177     | insulator  | insulator |
| K1Na1O4S1.ICSD.26014      | insulator  | insulator |
| K1Na1O4S1.ICSD.77343      | insulator  | insulator |
| K1Na1O5Pr1Ta1.ICSD.419857 | insulator  | insulator |
| K1Na1O6V2.ICSD.2199       | insulator  | insulator |
| K1Na1O7S2.ICSD.413050     | insulator  | insulator |
| K1Na1S1.ICSD.62658        | insulator  | insulator |
| K1Na1Se1.ICSD.67278       | insulator  | insulator |
| K1Na1Te1.ICSD.67276       | insulator  | insulator |
| K1Na2Ni1O2.ICSD.79878     | insulator  | insulator |
| K1Na2Sb1.ICSD.44332       | insulator  | insulator |
| K1Na2.ICSD.260784         | metal      | metal     |
| K1Na3O5W1.ICSD.40249      | insulator  | insulator |
| K1Nb1Nd2O6.ICSD.160451    | insulator  | insulator |
| K1Nb1O3.ICSD.9532         | insulator  | insulator |
| K1Nb1O3.ICSD.9533         | insulator  | insulator |
| K1Nb1O3.ICSD.9534         | insulator  | insulator |
| K1Nb1S2.ICSD.26286        | insulator  | insulator |
| K1Nb1Se2.ICSD.26288       | insulator  | insulator |
| K1Nd1O12P4.ICSD.4254      | insulator  | insulator |
| K1Nd1O3Pd1.ICSD.417107    | insulator  | insulator |
| K1Nd1O8S2.ICSD.200268     | insulator  | insulator |
| K1Nd1O8W2.ICSD.9364       | insulator  | insulator |
| K1Nd1S2.ICSD.641272       | insulator  | insulator |
| K1Nd1Te2.ICSD.98656       | insulator  | insulator |
| K1Nd1Te4.ICSD.412792      | insulator  | metal     |
| K1Ni1O4P1.ICSD.81271      | insulator  | insulator |
| K1Ni1O9P3.ICSD.91527      | insulator  | insulator |
| K1Ni1P1S4.ICSD.79482      | insulator  | insulator |
| K1Ni2S2.ICSD.641273       | metal      | metal     |
| K1Ni2Se2.ICSD.424686      | metal      | metal     |
| K1Ni2Se2.ICSD.641276      | metal      | metal     |
| K1O11V6.ICSD.410568       | metal      | metal     |
| K1O11V6.ICSD.410569       | metal      | metal     |
| K1O12P3Th2.ICSD.30432     | insulator  | insulator |

Supplementary Table 472. Five-fold cross validated predictions for the metal/insulator classification (464/598).

| system                 | calculated | predicted |
|------------------------|------------|-----------|
| K1O12P3Zr2.ICSD_4427   | insulator  | insulator |
| K1O12P4Pr1.ICSD_86289  | insulator  | insulator |
| K1O12P4Y1.ICSD_241230  | insulator  | insulator |
| K1O12Se2V3.ICSD_81231  | insulator  | insulator |
| K1O12Th2V3.ICSD_8232   | insulator  | insulator |
| K1O13P4Ta1.ICSD_20735  | insulator  | insulator |
| K1O1Ti1.ICSD_1570      | insulator  | insulator |
| K1O2Pr1.ICSD_40266     | insulator  | insulator |
| K1O2Sb1.ICSD_411214    | insulator  | insulator |
| K1O2Sc1.ICSD_34958     | insulator  | insulator |
| K1O2Ti1.ICSD_33553     | insulator  | insulator |
| K1O2Y1.ICSD_49650      | insulator  | insulator |
| K1O2.ICSD_180563       | metal      | metal     |
| K1O2.ICSD_38246        | metal      | metal     |
| K1O3Pd2.ICSD_248051    | insulator  | insulator |
| K1O3Sb1.ICSD_33546     | insulator  | insulator |
| K1O3Sb1.ICSD_41203     | insulator  | insulator |
| K1O3Sb1.ICSD_77333     | insulator  | insulator |
| K1O3Ta1.ICSD_184922    | insulator  | insulator |
| K1O3U1.ICSD_71241      | insulator  | insulator |
| K1O3V1.ICSD_1486       | insulator  | insulator |
| K1O3.ICSD_47163        | insulator  | insulator |
| K1O4P1Sr1.ICSD_83598   | insulator  | insulator |
| K1O4P1Zn1.ICSD_88955   | insulator  | insulator |
| K1O4Pb1V1.ICSD_80816   | insulator  | insulator |
| K1O4Re1.ICSD_72501     | insulator  | insulator |
| K1O4Ru1.ICSD_26612     | insulator  | insulator |
| K1O4Sr1V1.ICSD_404250  | insulator  | insulator |
| K1O4Sr1V1.ICSD_91782   | insulator  | insulator |
| K1O4Tc1.ICSD_61        | insulator  | insulator |
| K1O5S2Ti2Y2.ICSD_96952 | metal      | insulator |
| K1O5Sb3.ICSD_28493     | insulator  | insulator |
| K1O6Os2.ICSD_172620    | metal      | metal     |
| K1O6Os2.ICSD_419880    | metal      | metal     |
| K1O7P2Y1.ICSD_75171    | insulator  | insulator |
| K1O7Sb1Zn4.ICSD_421546 | insulator  | insulator |
| K1O8P2Sb1.ICSD_61788   | insulator  | insulator |
| K1O8Pr1S2.ICSD_200543  | insulator  | insulator |
| K1O8Ru4.ICSD_1562      | metal      | metal     |
| K1O8S2V1.ICSD_59175    | insulator  | insulator |
| K1O8V3.ICSD_421064     | insulator  | insulator |
| K1O8W2Y1.ICSD_90378    | insulator  | insulator |
| K1O8W2Yb1.ICSD_280877  | insulator  | insulator |
| K1P1Pb1S4.ICSD_171379  | insulator  | insulator |
| K1P1Pd1S4.ICSD_165315  | insulator  | insulator |
| K1P1S5Ti1.ICSD_82262   | insulator  | insulator |
| K1P1Se5Ti1.ICSD_81297  | insulator  | insulator |
| K1P1Zn1.ICSD_12160     | insulator  | insulator |
| K1P1.ICSD_14010        | insulator  | insulator |
| K1P2Rh2.ICSD_641292    | metal      | metal     |

Supplementary Table 473. Five-fold cross validated predictions for the metal/insulator classification (465/598).

| system                  | calculated | predicted |
|-------------------------|------------|-----------|
| K1P2S6Sb1.ICSD_409751   | insulator  | insulator |
| K1P2S7V1.ICSD_91756     | insulator  | insulator |
| K1P2Sb1Se6.ICSD_90152   | insulator  | insulator |
| K1P3Zn4.ICSD_262034     | insulator  | insulator |
| K1Pb2.ICSD_104613       | metal      | metal     |
| K1Pr1S2.ICSD_44943      | metal      | insulator |
| K1Pr1Se4Si1.ICSD_416622 | insulator  | insulator |
| K1Pr1Te2.ICSD_98655     | metal      | insulator |
| K1Pr1Te4.ICSD_391204    | metal      | insulator |
| K1Rb1S1.ICSD_72326      | insulator  | insulator |
| K1S1.ICSD_182223        | metal      | insulator |
| K1S2Sb1.ICSD_641324     | insulator  | insulator |
| K1S2Sm1.ICSD_44944      | metal      | insulator |
| K1S2Sn1.ICSD_23448      | metal      | metal     |
| K1S2Sn1.ICSD_641326     | metal      | metal     |
| K1S2Tb1.ICSD_641329     | insulator  | insulator |
| K1S2Ti1.ICSD_166489     | metal      | insulator |
| K1S2Ti1.ICSD_641335     | insulator  | metal     |
| K1S2Y1.ICSD_641347      | insulator  | insulator |
| K1S2Yb1.ICSD_44949      | metal      | metal     |
| K1S2Zr1.ICSD_641350     | metal      | insulator |
| K1S4Si1Y1.ICSD_602576   | insulator  | insulator |
| K1S4Si1Yb1.ICSD_409825  | metal      | insulator |
| K1S8V5.ICSD_602318      | insulator  | insulator |
| K1Sb1Se2.ICSD_100125    | insulator  | insulator |
| K1Sb1Se2.ICSD_44678     | insulator  | insulator |
| K1Sb1Sn1.ICSD_40816     | insulator  | insulator |
| K1Sb1Zn1.ICSD_12161     | insulator  | insulator |
| K1Sb1Zn1.ICSD_44680     | insulator  | insulator |
| K1Sb1.ICSD_56529        | insulator  | insulator |
| K1Sb2.ICSD_80945        | insulator  | metal     |
| K1Se2Sm1.ICSD_602818    | insulator  | metal     |
| K1Se2Yb1.ICSD_409679    | metal      | metal     |
| K1Se8Ti5.ICSD_602313    | insulator  | insulator |
| K1Se8V5.ICSD_602325     | metal      | insulator |
| K1Si1.ICSD_641367       | insulator  | insulator |
| K1Sm1Te2.ICSD_73547     | metal      | insulator |
| K1Te2Y1.ICSD_419995     | insulator  | insulator |
| K1Ti1.ICSD_262063       | metal      | metal     |
| K1Ti1.ICSD_262071       | metal      | metal     |
| K1Zn13.ICSD_641377      | metal      | metal     |
| K1.ICSD_161378          | metal      | metal     |
| K1.ICSD_161379          | metal      | metal     |
| K1.ICSD_161380          | metal      | metal     |
| K1.ICSD_165995          | metal      | metal     |
| K1.ICSD_165996          | metal      | metal     |
| K1.ICSD_44669           | metal      | metal     |
| K1.ICSD_44670           | metal      | metal     |
| K2Li14O14Pb3.ICSD_35250 | insulator  | insulator |
| K2Li1O4V1.ICSD_65945    | insulator  | insulator |

Supplementary Table 474. Five-fold cross validated predictions for the metal/insulator classification (466/598).

| system                    | calculated | predicted |
|---------------------------|------------|-----------|
| K2Li4O6U1.ICSD.65158      | insulator  | insulator |
| K2Li6O8Pb2.ICSD.37084     | insulator  | insulator |
| K2Mg1P2Se6.ICSD.413168    | insulator  | insulator |
| K2Mg2O12S3.ICSD.40986     | insulator  | insulator |
| K2Mg2O7Si2.ICSD.185362    | insulator  | insulator |
| K2Mn1O4.ICSD.22245        | insulator  | insulator |
| K2Mn1O6Se2.ICSD.71540     | insulator  | insulator |
| K2Mn1O7V2.ICSD.417892     | insulator  | insulator |
| K2Mn1P2S6.ICSD.658727     | insulator  | insulator |
| K2Mn1P2Se6.ICSD.165356    | insulator  | insulator |
| K2Mn1S2.ICSD.65453        | insulator  | insulator |
| K2Mn1Se2.ICSD.65456       | insulator  | insulator |
| K2Mn1Te2.ICSD.65459       | insulator  | insulator |
| K2Mn2O12S3.ICSD.158733    | insulator  | insulator |
| K2Mn2O15Si4Zn4.ICSD.20121 | insulator  | insulator |
| K2Mn2O3.ICSD.61038        | insulator  | insulator |
| K2Mn3S4.ICSD.411172       | insulator  | insulator |
| K2Mo1O1S3.ICSD.423988     | insulator  | insulator |
| K2Mo1O2S2.ICSD.423986     | insulator  | insulator |
| K2Mo1O2S2.ICSD.423987     | insulator  | insulator |
| K2Mo1O3S1.ICSD.423989     | insulator  | insulator |
| K2Mo1O4.ICSD.150842       | insulator  | insulator |
| K2Mo1S4.ICSD.409563       | insulator  | insulator |
| K2Mo2O7.ICSD.20133        | insulator  | insulator |
| K2Mo3O10.ICSD.24118       | insulator  | insulator |
| K2Mo9S11.ICSD.280261      | metal      | metal     |
| K2N2O5S1.ICSD.31031       | insulator  | insulator |
| K2N6Ni1O12Pb1.ICSD.1937   | metal      | metal     |
| K2N6Ni1O12Sr1.ICSD.179    | insulator  | metal     |
| K2Nb5O15Y1.ICSD.82147     | insulator  | insulator |
| K2Ni1O2.ICSD.201891       | insulator  | insulator |
| K2Ni1P2.ICSD.300119       | insulator  | insulator |
| K2Ni2O12S3.ICSD.40987     | insulator  | insulator |
| K2Ni3S4.ICSD.641275       | insulator  | insulator |
| K2O11Sb4.ICSD.2061        | insulator  | insulator |
| K2O12P3Pr1Zr1.ICSD.250163 | insulator  | insulator |
| K2O12P3Ti2.ICSD.202888    | insulator  | insulator |
| K2O12P4Sr1.ICSD.15725     | insulator  | insulator |
| K2O12S3Zn2.ICSD.82873     | insulator  | insulator |
| K2O12Te4.ICSD.1728        | insulator  | insulator |
| K2O13Ti6.ICSD.184901      | insulator  | insulator |
| K2O14Te2U3.ICSD.414064    | insulator  | insulator |
| K2O15Si6Ti1.ICSD.158934   | insulator  | insulator |
| K2O16V8.ICSD.100596       | metal      | insulator |
| K2O1.ICSD.180571          | insulator  | insulator |
| K2O2Pd1.ICSD.6158         | insulator  | insulator |
| K2O2Zn1.ICSD.34603        | insulator  | insulator |
| K2O2.ICSD.36641           | insulator  | insulator |
| K2O3Pb1.ICSD.15929        | insulator  | insulator |
| K2O3Pb1.ICSD.22063        | insulator  | insulator |

Supplementary Table 475. Five-fold cross validated predictions for the metal/insulator classification (467/598).

| system                  | calculated | predicted |
|-------------------------|------------|-----------|
| K2O3Pb2.ICSD.1412       | insulator  | insulator |
| K2O3S1.ICSD.60762       | insulator  | insulator |
| K2O3Sn1.ICSD.16265      | insulator  | insulator |
| K2O3Sn2.ICSD.2216       | insulator  | insulator |
| K2O3Sn2.ICSD.40463      | insulator  | insulator |
| K2O3Te1.ICSD.65640      | insulator  | insulator |
| K2O3Ti1.ICSD.162216     | insulator  | insulator |
| K2O3Zr1.ICSD.16264      | insulator  | insulator |
| K2O4Ru1.ICSD.415749     | insulator  | insulator |
| K2O4S1.ICSD.27956       | metal      | insulator |
| K2O4U1.ICSD.380361      | insulator  | insulator |
| K2O4W1.ICSD.26181       | insulator  | insulator |
| K2O4Zn3.ICSD.62146      | insulator  | insulator |
| K2O5S2.ICSD.16701       | insulator  | insulator |
| K2O5Ti2.ICSD.36097      | insulator  | insulator |
| K2O5Zr2.ICSD.18301      | insulator  | insulator |
| K2O6S2Se1.ICSD.25027    | insulator  | insulator |
| K2O6S2.ICSD.36154       | insulator  | insulator |
| K2O6Si2Zn1.ICSD.79705   | insulator  | insulator |
| K2O7S2.ICSD.249741      | insulator  | insulator |
| K2O7U2.ICSD.202984      | insulator  | insulator |
| K2O7W2.ICSD.67284       | insulator  | insulator |
| K2O7Zn6.ICSD.1120       | insulator  | insulator |
| K2O8P2V1.ICSD.200773    | insulator  | insulator |
| K2O8Pb1S2.ICSD.27652    | insulator  | insulator |
| K2O8Rb1Tb1V2.ICSD.39369 | insulator  | insulator |
| K2O8S2.ICSD.16972       | insulator  | insulator |
| K2O8V3.ICSD.1925        | insulator  | insulator |
| K2O9Si3Sn1.ICSD.19027   | insulator  | insulator |
| K2O9Si3Ti1.ICSD.19025   | insulator  | insulator |
| K2O9Si3Ti1.ICSD.412920  | insulator  | insulator |
| K2O9Si3Zr1.ICSD.56898   | insulator  | insulator |
| K2O9Si4.ICSD.31201      | insulator  | insulator |
| K2P2Pd1S6.ICSD.165316   | insulator  | insulator |
| K2P2Pd1.ICSD.15584      | insulator  | insulator |
| K2P2S6.ICSD.33278       | insulator  | insulator |
| K2P2Se6.ICSD.173417     | insulator  | insulator |
| K2P2Si1.ICSD.36367      | insulator  | insulator |
| K2Pd1S2.ICSD.641296     | insulator  | insulator |
| K2Pd1Se2.ICSD.641298    | insulator  | insulator |
| K2Pd1Te2.ICSD.641302    | insulator  | insulator |
| K2Pd3S4.ICSD.41885      | insulator  | insulator |
| K2Pd3S6U1.ICSD.262563   | insulator  | insulator |
| K2Pt1S15.ICSD.12164     | insulator  | insulator |
| K2Pt1S2.ICSD.26258      | insulator  | insulator |
| K2Pt1Se2.ICSD.40430     | insulator  | insulator |
| K2Pt1Te2.ICSD.40432     | insulator  | insulator |
| K2Pt4S6.ICSD.40062      | insulator  | insulator |
| K2Pt4Se6.ICSD.69438     | insulator  | insulator |
| K2S1.ICSD.183837        | insulator  | insulator |

Supplementary Table 476. Five-fold cross validated predictions for the metal/insulator classification (468/598).

| system                   | calculated | predicted |
|--------------------------|------------|-----------|
| K2S1_ICSD_412535         | insulator  | insulator |
| K2S2_ICSD_43406          | insulator  | insulator |
| K2S3Te1_ICSD_280023      | insulator  | insulator |
| K2S3Ti1_ICSD_72377       | insulator  | insulator |
| K2S3_ICSD_1263           | insulator  | insulator |
| K2S5Sn2_ICSD_73007       | insulator  | insulator |
| K2S5_ICSD_641320         | insulator  | insulator |
| K2S7Sb4_ICSD_25329       | insulator  | insulator |
| K2Sb4Se8_ICSD_402886     | insulator  | insulator |
| K2Se1_ICSD_168448        | insulator  | insulator |
| K2Se2_ICSD_73172         | insulator  | insulator |
| K2Se3Te1_ICSD_63012      | insulator  | insulator |
| K2Se3_ICSD_1264          | insulator  | insulator |
| K2Se4Sn2_ICSD_153907     | metal      | insulator |
| K2Se4W1_ICSD_59242       | insulator  | insulator |
| K2Se5Sn2_ICSD_72379      | insulator  | insulator |
| K2Se5_ICSD_72380         | insulator  | insulator |
| K2Se8Sn4_ICSD_72386      | insulator  | insulator |
| K2Sn1Te5_ICSD_36215      | insulator  | insulator |
| K2Te1_ICSD_182742        | insulator  | insulator |
| K2Te2Zn1_ICSD_420088     | insulator  | insulator |
| K2Te2_ICSD_96740         | insulator  | insulator |
| K2Te2_ICSD_96741         | insulator  | insulator |
| K2Te3U1_ICSD_89546       | insulator  | insulator |
| K2Te3Zr1_ICSD_410734     | insulator  | insulator |
| K2Te3_ICSD_2453          | insulator  | insulator |
| K3Li1Na2O6Te1_ICSD_65978 | insulator  | insulator |
| K3Mn1O4_ICSD_108935      | insulator  | insulator |
| K3Mn2O8_ICSD_165117      | metal      | insulator |
| K3Mn2O8_ICSD_55420       | metal      | insulator |
| K3N11P6_ICSD_50211       | insulator  | insulator |
| K3N1O3_ICSD_37204        | insulator  | insulator |
| K3N1O4_ICSD_36632        | insulator  | insulator |
| K3N1_ICSD_99999          | metal      | insulator |
| K3N6O12Rh1_ICSD_108777   | metal      | metal     |
| K3Na1O6Th2_ICSD_38325    | insulator  | insulator |
| K3Na1O8Ru2_ICSD_416039   | insulator  | insulator |
| K3Na1O8Ru2_ICSD_416040   | insulator  | insulator |
| K3Na1O8S2_ICSD_186839    | insulator  | insulator |
| K3Na1O8Se2_ICSD_54168    | insulator  | insulator |
| K3Nb1O8_ICSD_30405       | insulator  | insulator |
| K3Nd1O8P2_ICSD_8274      | insulator  | insulator |
| K3Nd1O8V2_ICSD_84234     | insulator  | insulator |
| K3Ni1O2_ICSD_262579      | insulator  | insulator |
| K3Ni1O2_ICSD_73216       | insulator  | insulator |
| K3Ni2O4_ICSD_14157       | insulator  | insulator |
| K3O14V5_ICSD_24068       | insulator  | insulator |
| K3O3S1V1_ICSD_419400     | insulator  | insulator |
| K3O3Sb1_ICSD_279579      | insulator  | insulator |
| K3O4Pd2_ICSD_245610      | metal      | insulator |

Supplementary Table 477. Five-fold cross validated predictions for the metal/insulator classification (469/598).

| system                    | calculated | predicted |
|---------------------------|------------|-----------|
| K3O4Pt2_ICSD_14158        | metal      | insulator |
| K3O4Sb1_ICSD_280867       | insulator  | insulator |
| K3O4V1_ICSD_108936        | insulator  | insulator |
| K3O4V1_ICSD_4138          | insulator  | insulator |
| K3O7Sc1Si2_ICSD_413432    | insulator  | insulator |
| K3O8Ta1_ICSD_30406        | insulator  | insulator |
| K3O8V3_ICSD_100782        | insulator  | insulator |
| K3P1S4_ICSD_24599         | insulator  | insulator |
| K3P1Se16_ICSD_280849      | insulator  | insulator |
| K3P1_ICSD_25550           | insulator  | insulator |
| K3P5Ru1Se10_ICSD_406200   | insulator  | insulator |
| K3S3Sb1_ICSD_641323       | insulator  | insulator |
| K3S4Sb1_ICSD_402642       | insulator  | insulator |
| K3S4Sb1_ICSD_41895        | insulator  | insulator |
| K3Sb1Se3_ICSD_89607       | insulator  | insulator |
| K3Sb1Se4_ICSD_65142       | insulator  | insulator |
| K3Sb1Te3_ICSD_300182      | insulator  | insulator |
| K3Sb1_ICSD_641351         | insulator  | insulator |
| K3Sb1_ICSD_656327         | insulator  | metal     |
| K4Mo8O52P12_ICSD_35463    | insulator  | insulator |
| K4N2O14S4_ICSD_16879      | insulator  | insulator |
| K4N6Ni1O12_ICSD_24529     | insulator  | insulator |
| K4Na2O6Te1_ICSD_202073    | insulator  | insulator |
| K4Na2O6Ti2_ICSD_74956     | insulator  | insulator |
| K4Ni3O6_ICSD_426450       | insulator  | insulator |
| K4O12W3Zn1_ICSD_200518    | insulator  | insulator |
| K4O12Zr5_ICSD_14024       | insulator  | insulator |
| K4O21Te2U5_ICSD_153175    | insulator  | insulator |
| K4O3Sb2_ICSD_280170       | insulator  | insulator |
| K4O4Pb1_ICSD_37268        | insulator  | insulator |
| K4O4Sn1_ICSD_158          | insulator  | insulator |
| K4O7P2_ICSD_187833        | insulator  | insulator |
| K4O7V2_ICSD_250388        | insulator  | insulator |
| K4O8P2_ICSD_418250        | insulator  | insulator |
| K4P2Pd1S8_ICSD_165312     | insulator  | insulator |
| K4P2Zn1_ICSD_67261        | insulator  | insulator |
| K4P3_ICSD_64625           | metal      | insulator |
| K4P6_ICSD_33259           | insulator  | insulator |
| K4P8Te4_ICSD_249937       | insulator  | insulator |
| K4S11Ta2_ICSD_410672      | insulator  | insulator |
| K4S14Ti3_ICSD_68154       | insulator  | insulator |
| K4Se6Sn2_ICSD_300234      | insulator  | insulator |
| K4Si4_ICSD_409852         | insulator  | insulator |
| K4Sn4_ICSD_409435         | insulator  | metal     |
| K5.978_ICSD_157565        | metal      | metal     |
| K5Sb4_ICSD_56530          | metal      | insulator |
| K5Te3_ICSD_66024          | insulator  | insulator |
| K6Mg1Na14Tl18_ICSD_236347 | metal      | metal     |
| K6Mg1O4_ICSD_2340         | insulator  | insulator |
| K6Mn1S4_ICSD_65448        | insulator  | insulator |

Supplementary Table 478. Five-fold cross validated predictions for the metal/insulator classification (470/598).

| system                    | calculated | predicted |
|---------------------------|------------|-----------|
| K6Mn1Se4.ICSD_65450       | insulator  | insulator |
| K6Mn1Te4.ICSD_65452       | insulator  | insulator |
| K6N4O3W2.ICSD_73549       | insulator  | insulator |
| K6Na14Ti18Zn1.ICSD_236348 | metal      | metal     |
| K6O5Pb2.ICSD_74873        | insulator  | insulator |
| K6O9Se2.ICSD_240701       | insulator  | insulator |
| K6Se6Sn2.ICSD_410863      | insulator  | insulator |
| K6Si2Te6.ICSD_1238        | insulator  | insulator |
| K6Sn2Te6.ICSD_10109       | insulator  | insulator |
| K7Li1Si8.ICSD_61144       | insulator  | insulator |
| K8O24Sr2U6.ICSD_91784     | insulator  | insulator |
| K8Sb4Sn1.ICSD_44679       | insulator  | insulator |
| K8Si46.ICSD_15641         | metal      | metal     |
| K8Sn46.ICSD_25301         | metal      | metal     |
| K8Ti11.ICSD_370009        | metal      | metal     |
| Kr1.ICSD_43726            | insulator  | insulator |
| Kr1.ICSD_9785             | insulator  | insulator |
| La10O3Si8.ICSD_173575     | metal      | metal     |
| La1Li1O12P4.ICSD_416877   | insulator  | insulator |
| La1Li1O4Ti1.ICSD_91843    | insulator  | insulator |
| La1Li1Sn2.ICSD_641391     | metal      | metal     |
| La1Li2O7Ta2.ICSD_88496    | metal      | insulator |
| La1Li3P2.ICSD_49627       | insulator  | insulator |
| La1Li3Sb2.ICSD_49625      | metal      | metal     |
| La1Lu1O3.ICSD_51449       | insulator  | insulator |
| La1Mg12.ICSD_168466       | metal      | metal     |
| La1Mg1Na1O6Te1.ICSD_78532 | insulator  | insulator |
| La1Mg1Na1O6W1.ICSD_174386 | insulator  | insulator |
| La1Mg1Na1O6W1.ICSD_40497  | insulator  | insulator |
| La1Mg1Ni4.ICSD_184164     | metal      | metal     |
| La1Mg1Pd1.ICSD_657924     | metal      | metal     |
| La1Mg1Rh1.ICSD_412113     | metal      | metal     |
| La1Mg1Ti1.ICSD_414439     | metal      | metal     |
| La1Mg1.ICSD_641411        | metal      | metal     |
| La1Mg2Ni1.ICSD_96152      | metal      | metal     |
| La1Mg2Ni9.ICSD_55614      | metal      | metal     |
| La1Mg2Pd1.ICSD_158253     | metal      | metal     |
| La1Mg2.ICSD_641407        | metal      | metal     |
| La1Mg3.ICSD_104661        | metal      | metal     |
| La1Mn1O1Sb1.ICSD_419355   | metal      | metal     |
| La1Mn1O3.ICSD_162001      | metal      | metal     |
| La1Mn1O3.ICSD_188401      | metal      | metal     |
| La1Mn1O3.ICSD_54919       | insulator  | metal     |
| La1Mn1O3.ICSD_83761       | metal      | insulator |
| La1Mn1Si1.ICSD_85849      | metal      | metal     |
| La1Mn1Si2.ICSD_104670     | metal      | metal     |
| La1Mn2Si2.ICSD_80508      | metal      | metal     |
| La1Mn2Si2.ICSD_80509      | metal      | metal     |
| La1Mn3Ni2.ICSD_96116      | metal      | metal     |
| La1Mo2O8Rb1.ICSD_42700    | insulator  | insulator |

Supplementary Table 479. Five-fold cross validated predictions for the metal/insulator classification (471/598).

| system                  | calculated | predicted |
|-------------------------|------------|-----------|
| La1Mo6S8.ICSD_641455    | metal      | metal     |
| La1Mo6Se8.ICSD_641459   | metal      | metal     |
| La1N1O2Si1.ICSD_9752    | insulator  | insulator |
| La1N1.ICSD_162194       | metal      | metal     |
| La1N1.ICSD_162195       | insulator  | metal     |
| La1N1.ICSD_641466       | metal      | metal     |
| La1N2O1Ta1.ICSD_411138  | insulator  | insulator |
| La1N3O6.ICSD_281587     | insulator  | insulator |
| La1Na1O4Ti1.ICSD_82003  | insulator  | insulator |
| La1Na1O6Se2.ICSD_68467  | insulator  | insulator |
| La1Na1O8S2.ICSD_20354   | insulator  | insulator |
| La1Na1Se2.ICSD_641485   | insulator  | insulator |
| La1Nb1O4.ICSD_37139     | insulator  | insulator |
| La1Nb1O4.ICSD_73390     | insulator  | insulator |
| La1Nb1O6Te1.ICSD_413007 | insulator  | insulator |
| La1Ni1O1P1.ICSD_391427  | metal      | metal     |
| La1Ni1O2.ICSD_153058    | metal      | metal     |
| La1Ni1O3.ICSD_67717     | metal      | insulator |
| La1Ni1P1.ICSD_641552    | metal      | metal     |
| La1Ni1Sb1.ICSD_79979    | metal      | metal     |
| La1Ni1Sb2.ICSD_658208   | metal      | metal     |
| La1Ni1Si1.ICSD_78264    | metal      | metal     |
| La1Ni1Si2.ICSD_658592   | metal      | metal     |
| La1Ni1Sn1.ICSD_108571   | metal      | metal     |
| La1Ni1Sn2.ICSD_641595   | metal      | metal     |
| La1Ni1Zn1.ICSD_416819   | metal      | metal     |
| La1Ni1.ICSD_641489      | metal      | metal     |
| La1Ni2P2.ICSD_641551    | metal      | metal     |
| La1Ni2Rh3.ICSD_183387   | metal      | metal     |
| La1Ni2Si2.ICSD_641572   | metal      | metal     |
| La1Ni2Sn2.ICSD_603430   | metal      | metal     |
| La1Ni2Sn2.ICSD_641594   | metal      | metal     |
| La1Ni2.ICSD_104673      | metal      | metal     |
| La1Ni3Rh2.ICSD_183385   | metal      | metal     |
| La1Ni3.ICSD_641509      | metal      | metal     |
| La1Ni4Sn2.ICSD_641589   | metal      | metal     |
| La1Ni5P3.ICSD_38311     | metal      | metal     |
| La1Ni5Sn1.ICSD_641587   | metal      | metal     |
| La1Ni5.ICSD_657601      | metal      | metal     |
| La1Ni9Si2.ICSD_641567   | metal      | metal     |
| La1Ni9Si4.ICSD_98409    | metal      | metal     |
| La1O1P1Zn1.ICSD_85777   | insulator  | insulator |
| La1O1Sb1Zn1.ICSD_182893 | metal      | insulator |
| La1O2Rb1.ICSD_27331     | insulator  | insulator |
| La1O3Ru1.ICSD_75569     | insulator  | metal     |
| La1O3Ti1.ICSD_28908     | metal      | insulator |
| La1O3Ti1.ICSD_200088    | insulator  | insulator |
| La1O3Tm1.ICSD_419665    | insulator  | insulator |
| La1O3V1.ICSD_28925      | metal      | metal     |
| La1O3V1.ICSD_86557      | insulator  | insulator |

Supplementary Table 480. Five-fold cross validated predictions for the metal/insulator classification (472/598).

| system                 | calculated | predicted |
|------------------------|------------|-----------|
| La1O3Y1.ICSD.89455     | insulator  | insulator |
| La1O3Yb1.ICSD.15093    | insulator  | insulator |
| La1O4P1.ICSD.184549    | insulator  | insulator |
| La1O4P1.ICSD.21066     | insulator  | insulator |
| La1O4P1.ICSD.31564     | insulator  | insulator |
| La1O4P1.ICSD.79747     | insulator  | insulator |
| La1O4P1.ICSD.92155     | insulator  | insulator |
| La1O4Pd2.ICSD.79340    | metal      | metal     |
| La1O4Ta1.ICSD.415429   | insulator  | insulator |
| La1O4Ta1.ICSD.97688    | insulator  | insulator |
| La1O4V1.ICSD.155240    | insulator  | insulator |
| La1O4V1.ICSD.400       | insulator  | insulator |
| La1O4V1.ICSD.411083    | insulator  | insulator |
| La1O7Rb1Ta2.ICSD.81870 | insulator  | insulator |
| La1O8Rb1W2.ICSD.27737  | insulator  | insulator |
| La1O9P3.ICSD.202640    | insulator  | insulator |
| La1O9Sb3.ICSD.55720    | insulator  | insulator |
| La1O9V3.ICSD.411084    | insulator  | insulator |
| La1Os1Si3.ICSD.641618  | metal      | metal     |
| La1Os2Si2.ICSD.641620  | metal      | metal     |
| La1Os2.ICSD.641607     | metal      | metal     |
| La1Os2.ICSD.641612     | metal      | metal     |
| La1Os4P12.ICSD.641615  | metal      | metal     |
| La1Os4Sb12.ICSD.183085 | metal      | metal     |
| La1P12Ru4.ICSD.641633  | metal      | metal     |
| La1P1Pd1.ICSD.57405    | metal      | metal     |
| La1P1Pt1.ICSD.417912   | metal      | metal     |
| La1P1S1.ICSD.641637    | insulator  | insulator |
| La1P1.ICSD.641626      | metal      | metal     |
| La1P2Rh2.ICSD.641632   | metal      | metal     |
| La1P2Ru2.ICSD.40795    | metal      | metal     |
| La1P2.ICSD.42015       | insulator  | metal     |
| La1P5.ICSD.357         | insulator  | insulator |
| La1P5.ICSD.96545       | metal      | metal     |
| La1P7.ICSD.41938       | insulator  | insulator |
| La1Pb1Pd1.ICSD.657940  | metal      | metal     |
| La1Pb3.ICSD.641640     | metal      | metal     |
| La1Pd1Sb1.ICSD.641676  | metal      | metal     |
| La1Pd1Sb2.ICSD.658217  | metal      | metal     |
| La1Pd1Sn1.ICSD.419190  | metal      | metal     |
| La1Pd1Sn1.ICSD.422484  | metal      | metal     |
| La1Pd1Sn2.ICSD.641683  | metal      | metal     |
| La1Pd1Ti1.ICSD.104699  | metal      | metal     |
| La1Pd1Zn1.ICSD.183335  | metal      | metal     |
| La1Pd1.ICSD.641672     | metal      | metal     |
| La1Pd2Sb2.ICSD.604351  | metal      | metal     |
| La1Pd2Si2.ICSD.601623  | metal      | metal     |
| La1Pd3S4.ICSD.61031    | metal      | metal     |
| La1Pd3.ICSD.641659     | metal      | metal     |
| La1Pd5.ICSD.104698     | metal      | metal     |

Supplementary Table 481. Five-fold cross validated predictions for the metal/insulator classification (473/598).

| system                  | calculated | predicted |
|-------------------------|------------|-----------|
| La1Pt1Si2.ICSD.57406    | metal      | metal     |
| La1Pt1Sn1.ICSD.416896   | metal      | metal     |
| La1Pt1Sn1.ICSD.416901   | metal      | metal     |
| La1Pt1.ICSD.641701      | metal      | metal     |
| La1Pt2Si2.ICSD.44700    | metal      | metal     |
| La1Pt2Si2.ICSD.641715   | metal      | metal     |
| La1Pt2.ICSD.641687      | metal      | metal     |
| La1Pt3.ICSD.104701      | metal      | metal     |
| La1Pt5.ICSD.150749      | metal      | metal     |
| La1Rb1S2.ICSD.81394     | insulator  | insulator |
| La1Rb1S4Si1.ICSD.414545 | insulator  | insulator |
| La1Rb1Se2.ICSD.281067   | insulator  | insulator |
| La1Rh1Si1.ICSD.641749   | metal      | metal     |
| La1Rh1Si2.ICSD.602316   | metal      | metal     |
| La1Rh1Si3.ICSD.604624   | metal      | metal     |
| La1Rh1Sn1.ICSD.415594   | metal      | metal     |
| La1Rh1Sn2.ICSD.410732   | metal      | metal     |
| La1Rh1Sn2.ICSD.641754   | metal      | metal     |
| La1Rh1Zn1.ICSD.419081   | metal      | metal     |
| La1Rh1.ICSD.656950      | metal      | metal     |
| La1Rh2Si2.ICSD.641752   | metal      | metal     |
| La1Rh2Sn4.ICSD.641757   | metal      | metal     |
| La1Rh2.ICSD.656951      | metal      | metal     |
| La1Rh3Si2.ICSD.44708    | metal      | metal     |
| La1Rh3Si2.ICSD.641743   | metal      | metal     |
| La1Rh3.ICSD.641723      | metal      | metal     |
| La1Rh3.ICSD.641724      | metal      | metal     |
| La1Rh3.ICSD.641738      | metal      | metal     |
| La1Ru1Si1.ICSD.41249    | metal      | metal     |
| La1Ru1Si2.ICSD.71960    | metal      | metal     |
| La1Ru1Si3.ICSD.641787   | metal      | metal     |
| La1Ru1Sn3.ICSD.104715   | metal      | metal     |
| La1Ru2Si2.ICSD.641785   | metal      | metal     |
| La1Ru2.ICSD.104713      | metal      | metal     |
| La1Ru3Si2.ICSD.100785   | metal      | metal     |
| La1Ru4Sb12.ICSD.641783  | metal      | metal     |
| La1S1.ICSD.183951       | metal      | metal     |
| La1S1.ICSD.641804       | metal      | metal     |
| La1S1.ICSD.77831        | metal      | metal     |
| La1S2.ICSD.641839       | metal      | metal     |
| La1S2.ICSD.656243       | metal      | insulator |
| La1S2.ICSD.659874       | insulator  | insulator |
| La1S3Yb1.ICSD.99664     | metal      | insulator |
| La1Sb1Te1.ICSD.601624   | metal      | metal     |
| La1Sb1.ICSD.44806       | metal      | metal     |
| La1Sb1.ICSD.641893      | metal      | metal     |
| La1Sb2.ICSD.641892      | metal      | metal     |
| La1Sc1Si1.ICSD.641915   | metal      | metal     |
| La1Se1.9.ICSD.69730     | insulator  | insulator |
| La1Se1.ICSD.183952      | metal      | metal     |

Supplementary Table 482. Five-fold cross validated predictions for the metal/insulator classification (474/598).

| system                   | calculated | predicted |
|--------------------------|------------|-----------|
| La1Se1_ICSD_29395        | metal      | metal     |
| La1Se1_ICSD_77829        | metal      | metal     |
| La1Se2_ICSD_641932       | metal      | metal     |
| La1Se3Yb1_ICSD_99665     | metal      | insulator |
| La1Si10_ICSD_246806      | metal      | metal     |
| La1Si1_ICSD_408030       | metal      | metal     |
| La1Si1_ICSD_641960       | metal      | metal     |
| La1Si2_ICSD_641982       | metal      | metal     |
| La1Si5_ICSD_246809       | metal      | metal     |
| La1Sn1Zn1_ICSD_152623    | metal      | metal     |
| La1Sn1_ICSD_641992       | metal      | metal     |
| La1Sn2_ICSD_657383       | metal      | metal     |
| La1Sn3_ICSD_151359       | metal      | metal     |
| La1Te1_ICSD_183953       | metal      | metal     |
| La1Te1_ICSD_642022       | metal      | metal     |
| La1Te2_ICSD_23957        | metal      | metal     |
| La1Te2_ICSD_90911        | metal      | metal     |
| La1Ti1Zn1_ICSD_642075    | metal      | metal     |
| La1Ti1_ICSD_104730       | metal      | metal     |
| La1Ti3_ICSD_104731       | metal      | metal     |
| La1Zn11_ICSD_150493      | metal      | metal     |
| La1Zn13_ICSD_642091      | metal      | metal     |
| La1Zn1_ICSD_104735       | metal      | metal     |
| La1Zn2_ICSD_642080       | metal      | metal     |
| La1Zn4_ICSD_262792       | metal      | metal     |
| La1Zn5_ICSD_159122       | metal      | metal     |
| La1_ICSD_43568           | metal      | metal     |
| La1_ICSD_43573           | metal      | metal     |
| La1_ICSD_43574           | metal      | metal     |
| La1_ICSD_641383          | metal      | metal     |
| La2Li2Si3_ICSD_423611    | metal      | metal     |
| La2Mg17_ICSD_104663      | metal      | metal     |
| La2Mg1Ni2_ICSD_411081    | metal      | metal     |
| La2Mn2O3Se2_ICSD_181387  | insulator  | metal     |
| La2Mo1O12Te3_ICSD_171245 | insulator  | insulator |
| La2Mo1O6_ICSD_25611      | insulator  | insulator |
| La2Mo2O7_ICSD_202189     | metal      | insulator |
| La2Ni1O4_ICSD_56319      | insulator  | insulator |
| La2Ni1O4_ICSD_98562      | insulator  | metal     |
| La2Ni2Zn1_ICSD_416817    | metal      | metal     |
| La2Ni3_ICSD_660167       | metal      | metal     |
| La2Ni7_ICSD_641494       | metal      | metal     |
| La2O12W3_ICSD_78180      | insulator  | insulator |
| La2O2S1_ICSD_154583      | insulator  | insulator |
| La2O2S2_ICSD_2455        | insulator  | insulator |
| La2O2S2_ICSD_68498       | insulator  | insulator |
| La2O2Se1_ICSD_25804      | insulator  | insulator |
| La2O2Te1_ICSD_89557      | insulator  | insulator |
| La2O3_ICSD_160205        | insulator  | insulator |
| La2O3_ICSD_160220        | insulator  | insulator |

Supplementary Table 483. Five-fold cross validated predictions for the metal/insulator classification (475/598).

| system                   | calculated | predicted |
|--------------------------|------------|-----------|
| La2O3_ICSD_184531        | insulator  | insulator |
| La2O3_ICSD_26864         | insulator  | insulator |
| La2O4Pd1_ICSD_40262      | metal      | insulator |
| La2O4Se1Si1_ICSD_69552   | insulator  | insulator |
| La2O5Pd2_ICSD_65031      | insulator  | insulator |
| La2O5Si1_ICSD_109414     | insulator  | insulator |
| La2O6Re1V1_ICSD_169471   | metal      | metal     |
| La2O6S1_ICSD_66823       | insulator  | insulator |
| La2O6Te1_ICSD_62134      | insulator  | insulator |
| La2O7Sn2_ICSD_153813     | insulator  | insulator |
| La2O7Ti2_ICSD_164027     | insulator  | insulator |
| La2O7Zr2_ICSD_154752     | insulator  | metal     |
| La2O7Zr2_ICSD_184093     | metal      | insulator |
| La2O9Si1Ti2_ICSD_75583   | insulator  | insulator |
| La2O9W2_ICSD_93721       | insulator  | insulator |
| La2Pb1Pd2_ICSD_99190     | metal      | metal     |
| La2Rh1Si3_ICSD_641751    | metal      | metal     |
| La2Rh3Si5_ICSD_40427     | metal      | metal     |
| La2Rh3Sn5_ICSD_104709    | metal      | metal     |
| La2Rh7_ICSD_641735       | metal      | metal     |
| La2Rh7_ICSD_641740       | metal      | metal     |
| La2S3_ICSD_15151         | insulator  | insulator |
| La2S5Si1_ICSD_240952     | insulator  | insulator |
| La2S5Sn1_ICSD_641853     | metal      | metal     |
| La2S5Zr1_ICSD_425078     | insulator  | insulator |
| La2Sb1_ICSD_423290       | metal      | metal     |
| La2Se9U2_ICSD_248052     | metal      | insulator |
| La2Zn17_ICSD_642087      | metal      | metal     |
| La3Li5Nb2O12_ICSD_68251  | insulator  | insulator |
| La3Li5O12Ta2_ICSD_68252  | insulator  | insulator |
| La3Mn1O6S3W1_ICSD_380406 | metal      | insulator |
| La3Mn4Sn4_ICSD_656265    | metal      | metal     |
| La3N1S3_ICSD_416221      | insulator  | insulator |
| La3Nb1O7_ICSD_10058      | insulator  | insulator |
| La3Ni1O6S3W1_ICSD_380403 | metal      | insulator |
| La3Ni1_ICSD_603212       | metal      | metal     |
| La3Ni2O6_ICSD_249209     | metal      | metal     |
| La3Ni3Zn1_ICSD_416818    | metal      | metal     |
| La3O10Os2_ICSD_10104     | metal      | insulator |
| La3O10Re2_ICSD_202001    | insulator  | insulator |
| La3O11Ru3_ICSD_2206      | metal      | insulator |
| La3O3Sb1_ICSD_380456     | insulator  | insulator |
| La3O7Os1_ICSD_59664      | insulator  | insulator |
| La3O7Ru1_ICSD_416718     | insulator  | insulator |
| La3O7Sb1_ICSD_246732     | insulator  | insulator |
| La3O7Ta1_ICSD_168909     | insulator  | insulator |
| La3O7Ta1_ICSD_55655      | insulator  | insulator |
| La3O8Re1_ICSD_38323      | insulator  | insulator |
| La3Os1_ICSD_641610       | metal      | metal     |
| La3Pb13Rh4_ICSD_641650   | metal      | metal     |

Supplementary Table 484. Five-fold cross validated predictions for the metal/insulator classification (476/598).

| system                  | calculated | predicted |
|-------------------------|------------|-----------|
| La3Pd4Zn4.ICSD_182774   | metal      | metal     |
| La3Pd4.ICSD_641663      | metal      | metal     |
| La3Pd5Si1.ICSD_260033   | metal      | metal     |
| La3Pt2.ICSD_641685      | metal      | metal     |
| La3Pt4Zn4.ICSD_182775   | metal      | metal     |
| La3Pt4.ICSD_641693      | metal      | metal     |
| La3Rh2.ICSD_656947      | insulator  | metal     |
| La3Rh4Sn13.ICSD_102351  | metal      | metal     |
| La3Ru1.ICSD_641781      | metal      | metal     |
| La3Ru4Sn13.ICSD_423134  | metal      | metal     |
| La3S4.ICSD_641834       | metal      | metal     |
| La3Sb5Ti1.ICSD_80907    | metal      | metal     |
| La3Sb5Zr1.ICSD_83905    | metal      | metal     |
| La3Se4.ICSD_641920      | metal      | metal     |
| La3Si2.ICSD_44696       | metal      | metal     |
| La3Sn1.ICSD_603209      | metal      | metal     |
| La3Sn4.ICSD_423418      | metal      | metal     |
| La3Sn5.ICSD_165185      | metal      | metal     |
| La3Te4.ICSD_642029      | metal      | metal     |
| La3Ti1.ICSD_642071      | metal      | metal     |
| La3Ti5.ICSD_642069      | metal      | metal     |
| La4Mg1Ru1.ICSD_418013   | metal      | metal     |
| La4Mn1O1S6.ICSD_391305  | insulator  | insulator |
| La4Mn1O1Se6.ICSD_391303 | insulator  | insulator |
| La4Mn1S7.ICSD_641433    | insulator  | insulator |
| La4N2S3.ICSD_415780     | insulator  | insulator |
| La4N2Te3.ICSD_414591    | insulator  | insulator |
| La4Ni1S7.ICSD_641558    | insulator  | insulator |
| La4O10Re2.ICSD_81       | insulator  | insulator |
| La4O12Ti3.ICSD_91952    | insulator  | insulator |
| La4O19Os6.ICSD_100099   | metal      | metal     |
| La4O19Re6.ICSD_22207    | metal      | metal     |
| La4O19Ru6.ICSD_100098   | metal      | metal     |
| La4O4Se3.ICSD_419128    | insulator  | insulator |
| La4O7Pd1.ICSD_65032     | insulator  | insulator |
| La4Pb3.ICSD_641648      | metal      | metal     |
| La4Rh3.ICSD_656948      | metal      | metal     |
| La4Sb3.ICSD_641896      | metal      | metal     |
| La5N1O2S4.ICSD_420918   | insulator  | insulator |
| La5Pb3.ICSD_641643      | metal      | metal     |
| La5Pb4.ICSD_23564       | metal      | metal     |
| La5Ru2.ICSD_641763      | metal      | metal     |
| La5Sb3.ICSD_641888      | metal      | metal     |
| La5Si3.ICSD_641952      | metal      | metal     |
| La5Si3.ICSD_641974      | metal      | metal     |
| La5Si4.ICSD_641953      | metal      | metal     |
| La5Sn1Zn2.ICSD_261925   | metal      | metal     |
| La5Sn3.ICSD_641987      | metal      | metal     |
| La5Sn3.ICSD_641990      | metal      | metal     |
| La5Ti3.ICSD_642068      | metal      | metal     |

Supplementary Table 485. Five-fold cross validated predictions for the metal/insulator classification (477/598).

| system                             | calculated | predicted |
|------------------------------------|------------|-----------|
| La6Ni6P17.ICSD_2242                | metal      | metal     |
| La6O12U1.ICSD_202585               | insulator  | insulator |
| La6O18Re4.ICSD_30535               | insulator  | insulator |
| La6P17Pd6.ICSD_30850               | metal      | metal     |
| La7Ni16.ICSD_104682                | metal      | metal     |
| La7Ni2Zn1.ICSD_159116              | metal      | metal     |
| La7Ni3.ICSD_104680                 | metal      | metal     |
| La7Pt3.ICSD_641692                 | metal      | metal     |
| La7Rh3.ICSD_656946                 | metal      | metal     |
| La8Ni4O17.ICSD_73921               | insulator  | insulator |
| Li0.33S2Ti1.ICSD_31342             | metal      | metal     |
| Li0.33Se2Ti1.ICSD_31343            | metal      | metal     |
| Li0.667Mn0.667Ni0.333O2.ICSD_90112 | insulator  | insulator |
| Li0.667O5V2.ICSD_25383             | metal      | insulator |
| Li10O9Zn4.ICSD_23634               | insulator  | insulator |
| Li10Pb3.ICSD_642250                | metal      | metal     |
| Li12Mg3Si4.ICSD_39596              | metal      | metal     |
| Li13Si4.ICSD_660135                | metal      | metal     |
| Li13Sn5.ICSD_104786                | metal      | metal     |
| Li14O14Pb3Rb2.ICSD_35405           | insulator  | insulator |
| Li14O14Pr3Rb2.ICSD_203142          | insulator  | insulator |
| Li15Pd4.ICSD_642260                | metal      | metal     |
| Li15Si4.ICSD_167674                | metal      | metal     |
| Li16N8Nb2O1.ICSD_174443            | insulator  | insulator |
| Li16N8O1Ta2.ICSD_71696             | insulator  | insulator |
| Li17Sn4.ICSD_240046                | metal      | metal     |
| Li1Lu1Sn2.ICSD_642111              | metal      | metal     |
| Li1Mg1N1.ICSD_167573               | insulator  | insulator |
| Li1Mg1O4P1.ICSD_201138             | insulator  | insulator |
| Li1Mg1O4V1.ICSD_63477              | insulator  | insulator |
| Li1Mg1P1.ICSD_44807                | metal      | insulator |
| Li1Mg1Pd1Sb1.ICSD_44808            | metal      | metal     |
| Li1Mg1Pd1Sn1.ICSD_16478            | metal      | metal     |
| Li1Mg1Pt1Sb1.ICSD_44809            | metal      | metal     |
| Li1Mg1Pt1Sn1.ICSD_104749           | metal      | metal     |
| Li1Mg2Si1.ICSD_181252              | metal      | metal     |
| Li1Mg2Ti1.ICSD_104752              | metal      | metal     |
| Li1Mg4O12V3.ICSD_250192            | insulator  | insulator |
| Li1Mg8Si4.ICSD_181249              | metal      | metal     |
| Li1Mn1O2.ICSD_154823               | insulator  | insulator |
| Li1Mn1O2.ICSD_15768                | metal      | insulator |
| Li1Mn1O2.ICSD_40486                | insulator  | insulator |
| Li1Mn1O2.ICSD_98164                | insulator  | metal     |
| Li1Mn1O4P1.ICSD_97763              | insulator  | insulator |
| Li1Mn1O4V1.ICSD_247772             | insulator  | insulator |
| Li1Mn1O4.ICSD_73115                | insulator  | insulator |
| Li1Mn1O7P2.ICSD_415153             | insulator  | insulator |
| Li1Mn1Se2.ICSD_50817               | metal      | metal     |
| Li1Mn1Te2.ICSD_110773              | metal      | metal     |
| Li1Mn2O4.ICSD_89459                | metal      | insulator |

Supplementary Table 486. Five-fold cross validated predictions for the metal/insulator classification (478/598).

| system                    | calculated | predicted |
|---------------------------|------------|-----------|
| Li1Mo1O2.ICSD.165326      | metal      | metal     |
| Li1Mo1O2.ICSD.183608      | metal      | insulator |
| Li1Mo1O4Rb1.ICSD.20641    | insulator  | insulator |
| Li1Mo1O7P2.ICSD.68522     | insulator  | insulator |
| Li1Mo1S2.ICSD.150688      | insulator  | metal     |
| Li1Mo2O8Sb1.ICSD.80595    | insulator  | insulator |
| Li1Mo2O8Ti3.ICSD.84291    | insulator  | insulator |
| Li1Mo2O8Y1.ICSD.23313     | insulator  | insulator |
| Li1Mo3O8Sc1.ICSD.28525    | insulator  | insulator |
| Li1Mo3O8Y1.ICSD.28526     | insulator  | insulator |
| Li1Mo3Se3.ICSD.604519     | metal      | metal     |
| Li1Mo6S8.ICSD.642160      | metal      | metal     |
| Li1Mo6Se8.ICSD.642167     | metal      | metal     |
| Li1N1Na2.ICSD.92310       | metal      | metal     |
| Li1N1Ni1.ICSD.247028      | metal      | metal     |
| Li1N1O1Si1.ICSD.34106     | insulator  | insulator |
| Li1N1O3.ICSD.67981        | insulator  | insulator |
| Li1N1Sr1.ICSD.87414       | insulator  | insulator |
| Li1N1Zn1.ICSD.16790       | insulator  | insulator |
| Li1N2Na5.ICSD.92315       | metal      | metal     |
| Li1N2Na5.ICSD.92316       | metal      | metal     |
| Li1N2P1.ICSD.32713        | insulator  | insulator |
| Li1N2U1.ICSD.98663        | insulator  | metal     |
| Li1N3Si2.ICSD.89524       | insulator  | insulator |
| Li1N3.ICSD.155166         | insulator  | insulator |
| Li1N4Re1Sr2.ICSD.411454   | insulator  | insulator |
| Li1Na1O4S1.ICSD.14364     | insulator  | insulator |
| Li1Na1O6V2.ICSD.20836     | insulator  | insulator |
| Li1Na1Se1.ICSD.67359      | insulator  | insulator |
| Li1Na1Te1.ICSD.67274      | insulator  | insulator |
| Li1Nb1O2.ICSD.300243      | insulator  | insulator |
| Li1Nb1O3.ICSD.169693      | insulator  | insulator |
| Li1Nb1O3.ICSD.28298       | insulator  | insulator |
| Li1Nb1O4Zn1.ICSD.75526    | insulator  | insulator |
| Li1Nb1O4Zn1.ICSD.75597    | insulator  | insulator |
| Li1Nb1O4Zn1.ICSD.85735    | insulator  | insulator |
| Li1Nb1O6Sr3.ICSD.380359   | insulator  | insulator |
| Li1Nb1O6W1.ICSD.202779    | insulator  | insulator |
| Li1Nb1S2.ICSD.26284       | insulator  | metal     |
| Li1Nb3O8.ICSD.2921        | insulator  | insulator |
| Li1Nd1O4Ti1.ICSD.91844    | insulator  | insulator |
| Li1Nd1Sn1.ICSD.54393      | metal      | metal     |
| Li1Nd1Sn2.ICSD.642207     | metal      | metal     |
| Li1Nd2Si2.ICSD.642206     | metal      | metal     |
| Li1Ni1O2.ICSD.164803      | metal      | insulator |
| Li1Ni1O2.ICSD.164853      | insulator  | insulator |
| Li1Ni1O4P1.ICSD.184770    | insulator  | insulator |
| Li1Ni1O4P1.ICSD.97767     | insulator  | insulator |
| Li1Ni1O8Rb5Si2.ICSD.40269 | insulator  | insulator |
| Li1Ni2P2.ICSD.36511       | metal      | metal     |

Supplementary Table 487. Five-fold cross validated predictions for the metal/insulator classification (479/598).

| system                  | calculated | predicted |
|-------------------------|------------|-----------|
| Li1Ni2Si1.ICSD.44819    | metal      | metal     |
| Li1Ni2Sn1.ICSD.25325    | metal      | metal     |
| Li1Ni6Si6.ICSD.41464    | metal      | metal     |
| Li1O12P3Sn2.ICSD.83832  | insulator  | insulator |
| Li1O12P3Zr2.ICSD.201935 | insulator  | insulator |
| Li1O12P4Tb1.ICSD.240703 | insulator  | insulator |
| Li1O12Te2V3.ICSD.249325 | insulator  | insulator |
| Li1O13V6.ICSD.280870    | metal      | metal     |
| Li1O1Rb1.ICSD.65170     | insulator  | insulator |
| Li1O2Pr1.ICSD.56752     | insulator  | insulator |
| Li1O2Rh1.ICSD.29213     | insulator  | metal     |
| Li1O2Rh1.ICSD.59179     | insulator  | insulator |
| Li1O2Ru1.ICSD.48007     | metal      | insulator |
| Li1O2Sc1.ICSD.31316     | insulator  | insulator |
| Li1O2Tb1.ICSD.21013     | insulator  | insulator |
| Li1O2Ti1.ICSD.164158    | metal      | insulator |
| Li1O2Ti1.ICSD.48128     | metal      | insulator |
| Li1O2Ti1.ICSD.33633     | insulator  | insulator |
| Li1O2V1.ICSD.202541     | insulator  | insulator |
| Li1O2Y1.ICSD.45511      | insulator  | insulator |
| Li1O2Yb1.ICSD.33955     | metal      | insulator |
| Li1O2.ICSD.180561       | metal      | insulator |
| Li1O2.ICSD.642216       | metal      | metal     |
| Li1O3Rb1Zn2.ICSD.67145  | insulator  | insulator |
| Li1O3Re1.ICSD.35012     | metal      | insulator |
| Li1O3Sb1.ICSD.24051     | insulator  | insulator |
| Li1O3Ta1.ICSD.9537      | insulator  | insulator |
| Li1O3U1.ICSD.22310      | insulator  | insulator |
| Li1O3V1.ICSD.23477      | insulator  | insulator |
| Li1O3V1.ICSD.2899       | insulator  | insulator |
| Li1O3.ICSD.180565       | metal      | insulator |
| Li1O4P1Pb1.ICSD.39206   | insulator  | insulator |
| Li1O4P1Zn1.ICSD.79352   | metal      | insulator |
| Li1O4Rb1S1.ICSD.174059  | insulator  | insulator |
| Li1O4Rb2V1.ICSD.40218   | insulator  | insulator |
| Li1O4Ru2.ICSD.290491    | insulator  | metal     |
| Li1O4Si1Y1.ICSD.34079   | metal      | insulator |
| Li1O4Ti2.ICSD.78482     | metal      | insulator |
| Li1O4V2.ICSD.89352      | insulator  | metal     |
| Li1O5P1Ti1.ICSD.39534   | insulator  | insulator |
| Li1O5P1Ti1.ICSD.39761   | insulator  | insulator |
| Li1O5Si1Ta1.ICSD.39648  | insulator  | insulator |
| Li1O5V2.ICSD.23817      | insulator  | insulator |
| Li1O5V2.ICSD.27245      | insulator  | insulator |
| Li1O5V2.ICSD.50982      | insulator  | insulator |
| Li1O5V2.ICSD.88639      | insulator  | insulator |
| Li1O6Re1Sr2.ICSD.246730 | insulator  | insulator |
| Li1O6Re1Sr2.ICSD.418991 | insulator  | insulator |
| Li1O6Ru1Sr3.ICSD.50022  | insulator  | insulator |
| Li1O6Sb1W1.ICSD.202748  | insulator  | insulator |

Supplementary Table 488. Five-fold cross validated predictions for the metal/insulator classification (480/598).

| system                  | calculated | predicted |
|-------------------------|------------|-----------|
| Li1O6Sc1Si2.ICSD.152075 | insulator  | insulator |
| Li1O6Sc1Si2.ICSD.152079 | insulator  | insulator |
| Li1O6Si2Ti1.ICSD.96292  | insulator  | insulator |
| Li1O6Si2V1.ICSD.55164   | insulator  | insulator |
| Li1O6Sr3Ta1.ICSD.380360 | insulator  | insulator |
| Li1O7P2Sc1.ICSD.91496   | insulator  | insulator |
| Li1O7P2Ti1.ICSD.166164  | insulator  | insulator |
| Li1O7P2V1.ICSD.80551    | insulator  | insulator |
| Li1O8Pr1W2.ICSD.200520  | insulator  | insulator |
| Li1O8Ta3.ICSD.1318      | insulator  | insulator |
| Li1O8V3.ICSD.16689      | insulator  | insulator |
| Li1O9P3Pb1.ICSD.1123    | insulator  | insulator |
| Li1P1S4Zn1.ICSD.95785   | insulator  | insulator |
| Li1P1Sr1.ICSD.416889    | insulator  | insulator |
| Li1P1Sr1.ICSD.56443     | insulator  | insulator |
| Li1P1Zn1.ICSD.44824     | metal      | insulator |
| Li1P1Zn1.ICSD.642242    | insulator  | metal     |
| Li1P1.ICSD.642222       | insulator  | insulator |
| Li1P5.ICSD.88710        | insulator  | insulator |
| Li1P7.ICSD.23621        | insulator  | insulator |
| Li1Pb1Pd2.ICSD.104767   | metal      | metal     |
| Li1Pb1Yb1.ICSD.409534   | metal      | metal     |
| Li1Pb1.ICSD.104763      | metal      | metal     |
| Li1Pb1.ICSD.642249      | metal      | metal     |
| Li1Pd1Si3.ICSD.39861    | metal      | metal     |
| Li1Pd1.ICSD.104770      | metal      | metal     |
| Li1Pd1.ICSD.642257      | metal      | metal     |
| Li1Pd2Sn1.ICSD.642271   | metal      | metal     |
| Li1Pd2Sn6.ICSD.152299   | metal      | metal     |
| Li1Pd2Ti1.ICSD.54365    | metal      | metal     |
| Li1Pd7.ICSD.642266      | metal      | metal     |
| Li1Pr1Sn1.ICSD.54392    | metal      | metal     |
| Li1Pr1Sn2.ICSD.642277   | metal      | metal     |
| Li1Pt1.ICSD.104777      | metal      | metal     |
| Li1Pt2.ICSD.104778      | metal      | metal     |
| Li1Pt7.ICSD.642281      | metal      | metal     |
| Li1Rb2S4V1.ICSD.414185  | insulator  | insulator |
| Li1Rh1Sn4.ICSD.412251   | metal      | metal     |
| Li1Rh1.ICSD.150551      | metal      | metal     |
| Li1Rh2Si2.ICSD.420085   | metal      | metal     |
| Li1Rh3.ICSD.642290      | metal      | metal     |
| Li1Ru1Sn4.ICSD.412250   | metal      | metal     |
| Li1S1.ICSD.182221       | metal      | insulator |
| Li1S2Sb1.ICSD.40457     | insulator  | insulator |
| Li1S2Sc1.ICSD.642305    | insulator  | insulator |
| Li1S2Sn1.ICSD.23451     | metal      | metal     |
| Li1S2Sn1.ICSD.642314    | metal      | insulator |
| Li1S2Ti1.ICSD.189826    | metal      | insulator |
| Li1S2Ti1.ICSD.642322    | insulator  | metal     |
| Li1S2V1.ICSD.16303      | metal      | metal     |

Supplementary Table 489. Five-fold cross validated predictions for the metal/insulator classification (481/598).

| system                  | calculated | predicted |
|-------------------------|------------|-----------|
| Li1S2V1.ICSD.642325     | metal      | metal     |
| Li1S2Y1.ICSD.44957      | insulator  | insulator |
| Li1S2Yb1.ICSD.642336    | metal      | insulator |
| Li1Sb1Sn1.ICSD.603169   | metal      | metal     |
| Li1Sb1Sr1.ICSD.172216   | insulator  | insulator |
| Li1Sb1Zn1.ICSD.642350   | insulator  | metal     |
| Li1Se2Tb1.ICSD.44962    | insulator  | insulator |
| Li1Se2Y1.ICSD.44963     | insulator  | insulator |
| Li1Se2Zr1.ICSD.642364   | metal      | insulator |
| Li1Si1Y1.ICSD.262362    | metal      | metal     |
| Li1Si1.ICSD.78364       | metal      | metal     |
| Li1Si2Y2.ICSD.8160      | metal      | metal     |
| Li1Sm1Sn2.ICSD.642381   | metal      | metal     |
| Li1Sn1Y1.ICSD.32041     | metal      | metal     |
| Li1Sn1.ICSD.104782      | metal      | metal     |
| Li1Sn2Tb1.ICSD.642386   | metal      | metal     |
| Li1Te2Ti1.ICSD.44908    | insulator  | metal     |
| Li1Te3.ICSD.935         | insulator  | insulator |
| Li1Tl1.ICSD.104789      | metal      | metal     |
| Li1Tl1.ICSD.262068      | metal      | metal     |
| Li1Tl1.ICSD.262070      | metal      | metal     |
| Li1Zn13.ICSD.421842     | metal      | metal     |
| Li1Zn1.ICSD.642409      | metal      | metal     |
| Li1.ICSD.109011         | metal      | metal     |
| Li1.ICSD.109012         | metal      | metal     |
| Li1.ICSD.161377         | metal      | metal     |
| Li1.ICSD.182499         | metal      | metal     |
| Li1.ICSD.44613          | metal      | metal     |
| Li1.ICSD.44760          | metal      | metal     |
| Li1.ICSD.57408          | metal      | metal     |
| Li1.ICSD.642105         | metal      | metal     |
| Li21Si5.ICSD.167675     | metal      | metal     |
| Li22Sn5.ICSD.642384     | metal      | metal     |
| Li23Sr6.ICSD.104788     | metal      | metal     |
| Li2Mg1Mn3O8.ICSD.90648  | insulator  | insulator |
| Li2Mg1Pb1.ICSD.174025   | metal      | metal     |
| Li2Mg1Si1.ICSD.167141   | insulator  | metal     |
| Li2Mg1Si1.ICSD.181255   | insulator  | metal     |
| Li2Mg1Ti1.ICSD.104753   | metal      | metal     |
| Li2Mg8Si4.ICSD.181250   | metal      | metal     |
| Li2Mn1O2.ICSD.37327     | metal      | insulator |
| Li2Mn1O3.ICSD.21022     | insulator  | insulator |
| Li2Mn1O4Si1.ICSD.161305 | insulator  | insulator |
| Li2Mn3O8Zn1.ICSD.26995  | insulator  | insulator |
| Li2N1Na1.ICSD.92308     | metal      | insulator |
| Li2N1O2P1.ICSD.188494   | insulator  | insulator |
| Li2N2Na4.ICSD.92309     | insulator  | metal     |
| Li2N2Th1.ICSD.16232     | insulator  | insulator |
| Li2N2U1.ICSD.642191     | metal      | insulator |
| Li2N2Zr1.ICSD.78790     | insulator  | insulator |

Supplementary Table 490. Five-fold cross validated predictions for the metal/insulator classification (482/598).

| system                  | calculated | predicted |
|-------------------------|------------|-----------|
| Li2N2.ICSD.423831       | metal      | insulator |
| Li2N5Ta3.ICSD.40568     | metal      | insulator |
| Li2Na1Sb1.ICSD.57410    | insulator  | insulator |
| Li2Na6O10W2.ICSD.49027  | insulator  | insulator |
| Li2Nb2O7Sr1.ICSD.88463  | insulator  | insulator |
| Li2Nb2O7Sr1.ICSD.88467  | insulator  | insulator |
| Li2Nd1Sb2.ICSD.36020    | metal      | metal     |
| Li2Ni12P7.ICSD.39598    | metal      | metal     |
| Li2Ni1O2.ICSD.25000     | insulator  | insulator |
| Li2Ni1O2.ICSD.73874     | insulator  | insulator |
| Li2Ni1O3.ICSD.153094    | insulator  | insulator |
| Li2Ni1O8W2.ICSD.92853   | insulator  | insulator |
| Li2O13Ti6.ICSD.182966   | insulator  | insulator |
| Li2O13V6.ICSD.59305     | metal      | metal     |
| Li2O1.ICSD.108886       | insulator  | insulator |
| Li2O1.ICSD.642219       | insulator  | insulator |
| Li2O20P4U3.ICSD.246191  | insulator  | insulator |
| Li2O2Pd1.ICSD.19007     | insulator  | insulator |
| Li2O2.ICSD.180557       | insulator  | insulator |
| Li2O2.ICSD.50658        | insulator  | insulator |
| Li2O3Pb1.ICSD.35182     | insulator  | insulator |
| Li2O3Pr1.ICSD.154704    | insulator  | insulator |
| Li2O3Re1.ICSD.200999    | insulator  | insulator |
| Li2O3Ru1.ICSD.202611    | insulator  | insulator |
| Li2O3Ru1.ICSD.78721     | insulator  | insulator |
| Li2O3Si1.ICSD.853       | insulator  | insulator |
| Li2O3Sn1.ICSD.21053     | insulator  | insulator |
| Li2O3Te1.ICSD.38416     | insulator  | insulator |
| Li2O3Te1.ICSD.4317      | insulator  | insulator |
| Li2O3Ti1.ICSD.261239    | insulator  | insulator |
| Li2O3Zr1.ICSD.31941     | insulator  | insulator |
| Li2O3Zr1.ICSD.94896     | insulator  | insulator |
| Li2O4Rb2Si1.ICSD.61086  | insulator  | insulator |
| Li2O4S1.ICSD.153807     | insulator  | insulator |
| Li2O4S1.ICSD.30276      | insulator  | insulator |
| Li2O4Si1Sr1.ICSD.167334 | insulator  | insulator |
| Li2O4Te1.ICSD.1485      | insulator  | insulator |
| Li2O4U1.ICSD.200297     | insulator  | insulator |
| Li2O4U1.ICSD.20578      | insulator  | insulator |
| Li2O4W1.ICSD.10479      | insulator  | insulator |
| Li2O4W1.ICSD.14196      | insulator  | insulator |
| Li2O4W1.ICSD.15395      | insulator  | insulator |
| Li2O5Si1Ti1.ICSD.78059  | insulator  | insulator |
| Li2O5Si1V1.ICSD.86775   | insulator  | insulator |
| Li2O5Si2.ICSD.78562     | insulator  | insulator |
| Li2O6Sn1Te1.ICSD.40265  | insulator  | insulator |
| Li2O6Te1Zr1.ICSD.71489  | insulator  | insulator |
| Li2O7Sr1Ta2.ICSD.246277 | insulator  | insulator |
| Li2O7Sr1Ta2.ICSD.88464  | insulator  | metal     |
| Li2O7Ti3.ICSD.426263    | insulator  | insulator |

Supplementary Table 491. Five-fold cross validated predictions for the metal/insulator classification (483/598).

| system                  | calculated | predicted |
|-------------------------|------------|-----------|
| Li2O7W2.ICSD.1897       | insulator  | insulator |
| Li2P2Pr1.ICSD.23259     | metal      | metal     |
| Li2P2Pr1.ICSD.642229    | metal      | metal     |
| Li2Pd1Sb1.ICSD.44816    | metal      | metal     |
| Li2Pd1.ICSD.642268      | metal      | metal     |
| Li2Pr1Sb2.ICSD.36019    | metal      | metal     |
| Li2Pt1Sb1.ICSD.642284   | metal      | metal     |
| Li2Pt1.ICSD.104780      | metal      | metal     |
| Li2S1.ICSD.657597       | insulator  | insulator |
| Li2S1.ICSD.91283        | insulator  | insulator |
| Li2S1.ICSD.91284        | insulator  | insulator |
| Li2S3Te1.ICSD.415120    | insulator  | insulator |
| Li2S3U1.ICSD.88095      | metal      | insulator |
| Li2Sb1.ICSD.100020      | metal      | insulator |
| Li2Se1.ICSD.642355      | insulator  | insulator |
| Li2Se3Te1.ICSD.415121   | insulator  | insulator |
| Li2Si1Zn1.ICSD.16221    | metal      | metal     |
| Li2Si1Zn1.ICSD.642379   | metal      | metal     |
| Li2Si1Zn1.ICSD.642380   | metal      | metal     |
| Li2Si1.ICSD.642372      | metal      | metal     |
| Li2Sn1Zn1.ICSD.104787   | metal      | metal     |
| Li2Sn5.ICSD.26200       | metal      | metal     |
| Li2Sr3.ICSD.15703       | metal      | metal     |
| Li2Te1.ICSD.642398      | insulator  | insulator |
| Li2Tl1.ICSD.642401      | metal      | metal     |
| Li3Mg8Si4.ICSD.181251   | metal      | metal     |
| Li3N1.ICSD.156903       | insulator  | insulator |
| Li3N1.ICSD.660252       | insulator  | insulator |
| Li3N2Na3.ICSD.92311     | metal      | metal     |
| Li3N2Na3.ICSD.92312     | metal      | metal     |
| Li3N2Sc1.ICSD.98140     | insulator  | insulator |
| Li3N4Nb1Sr2.ICSD.84715  | insulator  | insulator |
| Li3N4Ni4Sr3.ICSD.33902  | metal      | metal     |
| Li3N4Sr2Ta1.ICSD.84716  | insulator  | insulator |
| Li3Nb1O4.ICSD.30246     | insulator  | insulator |
| Li3Nd3O12W2.ICSD.245640 | insulator  | insulator |
| Li3Ni2O6Sb1.ICSD.183999 | insulator  | insulator |
| Li3O13V6.ICSD.59962     | metal      | metal     |
| Li3O4P1.ICSD.10257      | insulator  | insulator |
| Li3O4P1.ICSD.20208      | insulator  | insulator |
| Li3O4Sb1.ICSD.82864     | insulator  | insulator |
| Li3O4Ta1.ICSD.37126     | insulator  | insulator |
| Li3O4U1.ICSD.109090     | insulator  | insulator |
| Li3O4V1.ICSD.19002      | insulator  | insulator |
| Li3O6Sb1Zn2.ICSD.69189  | insulator  | insulator |
| Li3P1.ICSD.26880        | insulator  | insulator |
| Li3Pb1.ICSD.104764      | metal      | metal     |
| Li3Pd1.ICSD.104775      | metal      | metal     |
| Li3S3Sb1.ICSD.424834    | insulator  | insulator |
| Li3Sb1.ICSD.26879       | insulator  | insulator |

Supplementary Table 492. Five-fold cross validated predictions for the metal/insulator classification (484/598).

| system                  | calculated | predicted |
|-------------------------|------------|-----------|
| Li3Sb1_ICSD_642341      | insulator  | insulator |
| Li3Ti1_ICSD_10052       | metal      | metal     |
| Li4Mo1O5_ICSD_40270     | insulator  | insulator |
| Li4N2Na2_ICSD_92305     | insulator  | metal     |
| Li4N2Na2_ICSD_92306     | insulator  | metal     |
| Li4N2Na2_ICSD_92307     | metal      | insulator |
| Li4N3Ta1_ICSD_412585    | insulator  | insulator |
| Li4N6Si2Sr3_ICSD_421259 | insulator  | insulator |
| Li4O4Pb1_ICSD_38350     | insulator  | insulator |
| Li4O4Si1_ICSD_98615     | insulator  | insulator |
| Li4O4Ti1_ICSD_75164     | insulator  | insulator |
| Li4O5Se1_ICSD_92395     | insulator  | insulator |
| Li4O5Te1_ICSD_2403      | insulator  | insulator |
| Li4O5U1_ICSD_20452      | insulator  | insulator |
| Li4O5W1_ICSD_108819     | insulator  | insulator |
| Li4O7P2_ICSD_246859     | metal      | insulator |
| Li4O7P2_ICSD_59243      | insulator  | insulator |
| Li4P2Sr1_ICSD_416888    | insulator  | insulator |
| Li4Pt3Si1_ICSD_186537   | metal      | metal     |
| Li4Sb4Sr3_ICSD_25307    | metal      | metal     |
| Li5N2Na1_ICSD_92313     | insulator  | insulator |
| Li5N2Na1_ICSD_92314     | insulator  | insulator |
| Li5N3Ni3_ICSD_411152    | metal      | metal     |
| Li5N4Re1_ICSD_92467     | insulator  | insulator |
| Li5Na1Sn4_ICSD_12142    | metal      | metal     |
| Li5Na2Sn4_ICSD_104760   | metal      | metal     |
| Li5O4Ti1_ICSD_16219     | insulator  | insulator |
| Li5O5Sb1_ICSD_203030    | insulator  | insulator |
| Li5O6Re1_ICSD_30590     | insulator  | insulator |
| Li5O6Re1_ICSD_38381     | insulator  | insulator |
| Li5Sn2_ICSD_104783      | metal      | metal     |
| Li5Ti2_ICSD_10053       | metal      | metal     |
| Li6Mn2N6Sr2_ICSD_412874 | insulator  | insulator |
| Li6Mo1N4_ICSD_66095     | insulator  | insulator |
| Li6N4W1_ICSD_153620     | insulator  | insulator |
| Li6O4Zn1_ICSD_62137     | insulator  | insulator |
| Li6O6Te1_ICSD_40247     | insulator  | insulator |
| Li6O6U1_ICSD_25350      | insulator  | insulator |
| Li6O6U1_ICSD_48209      | insulator  | insulator |
| Li6O7Si2_ICSD_25752     | insulator  | insulator |
| Li6O7Zr2_ICSD_41321     | insulator  | insulator |
| Li7Mn1N4_ICSD_154076    | insulator  | insulator |
| Li7N4Nb1_ICSD_71547     | insulator  | insulator |
| Li7N4Ni1_ICSD_642178    | metal      | insulator |
| Li7N4P1_ICSD_642182     | insulator  | insulator |
| Li7N4Ta1_ICSD_67560     | insulator  | insulator |
| Li7N4V1_ICSD_409501     | insulator  | insulator |
| Li7N4V1_ICSD_44368      | insulator  | insulator |
| Li7N4V1_ICSD_96941      | insulator  | insulator |
| Li7O6Sb1_ICSD_15631     | insulator  | insulator |

Supplementary Table 493. Five-fold cross validated predictions for the metal/insulator classification (485/598).

| system                  | calculated | predicted |
|-------------------------|------------|-----------|
| Li7O6Ta1_ICSD_74950     | insulator  | insulator |
| Li7O8Rb1Si2_ICSD_33864  | insulator  | insulator |
| Li7P3S11_ICSD_157654    | insulator  | insulator |
| Li7Pb2_ICSD_104765      | metal      | metal     |
| Li7Si2_ICSD_24600       | metal      | metal     |
| Li7Si3_ICSD_167672      | metal      | metal     |
| Li7Sn2_ICSD_104784      | metal      | metal     |
| Li7Sn3_ICSD_104785      | metal      | metal     |
| Li8N2Se1_ICSD_247256    | insulator  | insulator |
| Li8N2Te1_ICSD_247257    | insulator  | insulator |
| Li8O6Pb1_ICSD_47104     | insulator  | insulator |
| Li8O6Pt1_ICSD_61218     | insulator  | insulator |
| Li8O6Sn1_ICSD_15104     | insulator  | insulator |
| Li8O6Tb1_ICSD_49026     | metal      | insulator |
| Li8Pb3_ICSD_15694       | metal      | metal     |
| Li9N1S3_ICSD_240749     | insulator  | insulator |
| Lu1Mg1_ICSD_161753      | metal      | metal     |
| Lu1Mn1O3_ICSD_15882     | metal      | insulator |
| Lu1Mn2_ICSD_642431      | metal      | metal     |
| Lu1Mn6Sn6_ICSD_57416    | metal      | metal     |
| Lu1N1_ICSD_169211       | insulator  | metal     |
| Lu1Na1O8Pd6_ICSD_416619 | metal      | metal     |
| Lu1Ni1P1_ICSD_642455    | metal      | metal     |
| Lu1Ni1Pb1_ICSD_160550   | metal      | metal     |
| Lu1Ni1Sb1_ICSD_642458   | metal      | metal     |
| Lu1Ni1Si2_ICSD_642460   | metal      | metal     |
| Lu1Ni1Sn1_ICSD_642464   | metal      | metal     |
| Lu1Ni2Si2_ICSD_642459   | metal      | metal     |
| Lu1Ni2Sn1_ICSD_104807   | metal      | metal     |
| Lu1Ni2_ICSD_104804      | metal      | metal     |
| Lu1Ni4Sn1_ICSD_642467   | metal      | metal     |
| Lu1Ni5Sn1_ICSD_167138   | metal      | metal     |
| Lu1Ni5_ICSD_104806      | metal      | metal     |
| Lu1O3Pr1_ICSD_50758     | insulator  | insulator |
| Lu1O3V1_ICSD_185830     | insulator  | insulator |
| Lu1O4P1_ICSD_162338     | insulator  | insulator |
| Lu1O4P1_ICSD_162340     | insulator  | insulator |
| Lu1O4P1_ICSD_162341     | insulator  | insulator |
| Lu1O4P1_ICSD_162346     | insulator  | insulator |
| Lu1O4P1_ICSD_201133     | insulator  | insulator |
| Lu1O4P1_ICSD_2505       | metal      | insulator |
| Lu1O4V1_ICSD_160959     | insulator  | insulator |
| Lu1O4V1_ICSD_162326     | insulator  | insulator |
| Lu1O4V1_ICSD_246685     | insulator  | insulator |
| Lu1O4V1_ICSD_419281     | insulator  | insulator |
| Lu1O4V1_ICSD_419285     | insulator  | insulator |
| Lu1O4V1_ICSD_419288     | insulator  | insulator |
| Lu1Os2Si2_ICSD_642482   | metal      | metal     |
| Lu1Os2_ICSD_150526      | metal      | metal     |
| Lu1P1Pt1_ICSD_44915     | metal      | metal     |

Supplementary Table 494. Five-fold cross validated predictions for the metal/insulator classification (486/598).

| system                | calculated | predicted |
|-----------------------|------------|-----------|
| Lu1P1S4.ICSD_412857   | insulator  | insulator |
| Lu1P1.ICSD_44914      | metal      | metal     |
| Lu1Pb2.ICSD_104811    | metal      | metal     |
| Lu1Pb3.ICSD_104812    | metal      | metal     |
| Lu1Pd1Sn1.ICSD_642510 | metal      | metal     |
| Lu1Pd1Zn1.ICSD_183346 | metal      | metal     |
| Lu1Pd1.ICSD_642499    | metal      | metal     |
| Lu1Pd2Si1.ICSD_642506 | metal      | metal     |
| Lu1Pd2Si2.ICSD_603882 | metal      | metal     |
| Lu1Pd2Sn1.ICSD_104817 | metal      | metal     |
| Lu1Pd3.ICSD_104815    | metal      | metal     |
| Lu1Pt1Sb1.ICSD_44916  | metal      | metal     |
| Lu1Pt1Sn1.ICSD_642538 | metal      | metal     |
| Lu1Pt1.ICSD_642529    | metal      | metal     |
| Lu1Pt3.ICSD_642530    | metal      | metal     |
| Lu1Rb1S2.ICSD_81407   | insulator  | insulator |
| Lu1Rh1Si1.ICSD_90193  | metal      | metal     |
| Lu1Rh1.ICSD_104821    | metal      | metal     |
| Lu1Rh2Si2.ICSD_90198  | metal      | metal     |
| Lu1Rh2.ICSD_642546    | metal      | metal     |
| Lu1Ru1.ICSD_104824    | metal      | metal     |
| Lu1Ru2Si2.ICSD_90197  | metal      | metal     |
| Lu1Ru2.ICSD_150525    | metal      | metal     |
| Lu1S1.ICSD_642561     | metal      | metal     |
| Lu1S2Ti1.ICSD_642581  | insulator  | insulator |
| Lu1S2.ICSD_44918      | metal      | insulator |
| Lu1Sb1Zr1.ICSD_107074 | metal      | metal     |
| Lu1Sb1.ICSD_247647    | metal      | metal     |
| Lu1Sb1.ICSD_642588    | metal      | metal     |
| Lu1Sb2.ICSD_642589    | metal      | metal     |
| Lu1Se1.ICSD_44921     | metal      | metal     |
| Lu1Se2Ti1.ICSD_642602 | insulator  | insulator |
| Lu1Si1Ti1.ICSD_88208  | metal      | metal     |
| Lu1Si2.ICSD_642611    | metal      | metal     |
| Lu1Sn2Zn1.ICSD_183314 | metal      | metal     |
| Lu1Tc2.ICSD_642618    | metal      | metal     |
| Lu1Te1.ICSD_44922     | metal      | metal     |
| Lu1Te2Ti1.ICSD_642625 | insulator  | insulator |
| Lu1Te2.ICSD_642622    | metal      | metal     |
| Lu1Ti3.ICSD_104829    | metal      | metal     |
| Lu1Ti3.ICSD_642631    | metal      | metal     |
| Lu1Zn1.ICSD_104830    | metal      | metal     |
| Lu1.ICSD_43586        | metal      | metal     |
| Lu1.ICSD_44910        | metal      | metal     |
| Lu1.ICSD_642415       | metal      | metal     |
| Lu2Mg1S4.ICSD_37420   | insulator  | insulator |
| Lu2Mg1Se4.ICSD_44912  | insulator  | insulator |
| Lu2Mn1S4.ICSD_37421   | insulator  | insulator |
| Lu2Mn1Se4.ICSD_642434 | insulator  | insulator |
| Lu2Mn2O7.ICSD_56518   | insulator  | insulator |

Supplementary Table 495. Five-fold cross validated predictions for the metal/insulator classification (487/598).

| system                  | calculated | predicted |
|-------------------------|------------|-----------|
| Lu2O13Te5.ICSD_413669   | insulator  | insulator |
| Lu2O2S1.ICSD_109336     | insulator  | insulator |
| Lu2O3.ICSD_160217       | metal      | insulator |
| Lu2O3.ICSD_160232       | insulator  | insulator |
| Lu2O3.ICSD_33659        | insulator  | insulator |
| Lu2O5Si1.ICSD_89624     | insulator  | insulator |
| Lu2O7Si2.ICSD_412249    | insulator  | insulator |
| Lu2O7Sn2.ICSD_82965     | insulator  | insulator |
| Lu2O7V2.ICSD_160599     | metal      | insulator |
| Lu2O7V2.ICSD_32688      | insulator  | metal     |
| Lu2Pb1Pd2.ICSD_99200    | metal      | metal     |
| Lu2Pt1.ICSD_642523      | metal      | metal     |
| Lu2S3.ICSD_26974        | insulator  | insulator |
| Lu2S4Sr1.ICSD_642578    | insulator  | insulator |
| Lu2S4Zn1.ICSD_35089     | insulator  | insulator |
| Lu3Os4Si13.ICSD_600535  | metal      | metal     |
| Lu5Ni1Pb3.ICSD_152608   | metal      | metal     |
| Lu5Pb3.ICSD_168438      | metal      | metal     |
| Lu5Pd2Sb1.ICSD_87452    | metal      | metal     |
| Lu5Rh4Si10.ICSD_642550  | metal      | metal     |
| Lu5Si3.ICSD_414146      | metal      | metal     |
| Lu5Sn3.ICSD_642614      | metal      | metal     |
| Lu5Ti3.ICSD_642632      | metal      | metal     |
| Lu6Ni2Sn1.ICSD_642470   | metal      | metal     |
| Lu6O12U1.ICSD_23967     | insulator  | insulator |
| Lu7Te1.ICSD_97005       | metal      | metal     |
| Mg12Nd1.ICSD_104837     | metal      | metal     |
| Mg12Pr1.ICSD_104856     | metal      | metal     |
| Mg17Sr2.ICSD_642861     | metal      | metal     |
| Mg1Mn2O4.ICSD_16858     | insulator  | insulator |
| Mg1Mo1N2.ICSD_185913    | insulator  | insulator |
| Mg1Mo1O4.ICSD_20418     | insulator  | insulator |
| Mg1Mo1O6Sr2.ICSD_187662 | insulator  | insulator |
| Mg1Mo2O7.ICSD_1314      | insulator  | insulator |
| Mg1N2Si1.ICSD_186509    | insulator  | insulator |
| Mg1N2Si1.ICSD_23501     | insulator  | insulator |
| Mg1N2Si1.ICSD_44109     | insulator  | insulator |
| Mg1Na1Sb1.ICSD_41797    | insulator  | insulator |
| Mg1Na2Sn1.ICSD_262676   | metal      | metal     |
| Mg1Nb2O6.ICSD_85008     | insulator  | insulator |
| Mg1Nd1Ni4.ICSD_107423   | metal      | metal     |
| Mg1Nd1Pt1.ICSD_412356   | metal      | metal     |
| Mg1Nd1Sn1.ICSD_182480   | metal      | metal     |
| Mg1Nd1.ICSD_104834      | metal      | metal     |
| Mg1Nd1.ICSD_161742      | metal      | metal     |
| Mg1Nd2Ni2.ICSD_107329   | metal      | metal     |
| Mg1Ni1Sb1.ICSD_44925    | metal      | metal     |
| Mg1Ni1Tb1.ICSD_166874   | metal      | metal     |
| Mg1Ni1.ICSD_187255      | metal      | metal     |
| Mg1Ni1.ICSD_187256      | metal      | metal     |

Supplementary Table 496. Five-fold cross validated predictions for the metal/insulator classification (488/598).

| system                 | calculated | predicted |
|------------------------|------------|-----------|
| Mg1Ni2P1.ICSD_74784    | metal      | metal     |
| Mg1Ni2Pr2.ICSD_107328  | metal      | metal     |
| Mg1Ni2Pr2.ICSD_411080  | metal      | metal     |
| Mg1Ni2Sb1.ICSD_104841  | metal      | metal     |
| Mg1Ni2Sn1.ICSD_104842  | metal      | metal     |
| Mg1Ni2.ICSD_104838     | metal      | metal     |
| Mg1Ni2.ICSD_642687     | metal      | metal     |
| Mg1Ni4Pr1.ICSD_107422  | metal      | metal     |
| Mg1Ni4Y1.ICSD_107033   | metal      | metal     |
| Mg1Ni6Si6.ICSD_642706  | metal      | metal     |
| Mg1O1.ICSD_161842      | insulator  | insulator |
| Mg1O1.ICSD_162607      | insulator  | insulator |
| Mg1O1.ICSD_166273      | insulator  | insulator |
| Mg1O1.ICSD_181457      | insulator  | insulator |
| Mg1O1.ICSD_181459      | insulator  | insulator |
| Mg1O1.ICSD_181462      | insulator  | insulator |
| Mg1O1.ICSD_181463      | insulator  | insulator |
| Mg1O1.ICSD_181464      | insulator  | insulator |
| Mg1O1.ICSD_181465      | insulator  | insulator |
| Mg1O1.ICSD_181466      | insulator  | insulator |
| Mg1O1.ICSD_26958       | insulator  | insulator |
| Mg1O2.ICSD_41732       | insulator  | insulator |
| Mg1O3Se1.ICSD_494      | insulator  | insulator |
| Mg1O3Si1.ICSD_158959   | insulator  | insulator |
| Mg1O3Si1.ICSD_26489    | insulator  | insulator |
| Mg1O3Si1.ICSD_30893    | insulator  | insulator |
| Mg1O3Si1.ICSD_34074    | insulator  | insulator |
| Mg1O3Si1.ICSD_41659    | insulator  | insulator |
| Mg1O3Si1.ICSD_80669    | insulator  | insulator |
| Mg1O3Si1.ICSD_89805    | insulator  | insulator |
| Mg1O3Ti1.ICSD_169657   | insulator  | insulator |
| Mg1O3V1.ICSD_15927     | metal      | insulator |
| Mg1O3V1.ICSD_284       | insulator  | insulator |
| Mg1O4P1Rb1.ICSD_421738 | insulator  | insulator |
| Mg1O4P1Rb1.ICSD_421740 | insulator  | insulator |
| Mg1O4Rh2.ICSD_109299   | insulator  | insulator |
| Mg1O4S1.ICSD_16759     | insulator  | insulator |
| Mg1O4S1.ICSD_240893    | insulator  | insulator |
| Mg1O4Sb2.ICSD_4122     | insulator  | insulator |
| Mg1O4Se1.ICSD_109070   | insulator  | insulator |
| Mg1O4Ti2.ICSD_184695   | insulator  | insulator |
| Mg1O4Ti2.ICSD_184696   | metal      | insulator |
| Mg1O4V2.ICSD_60412     | metal      | metal     |
| Mg1O4W1.ICSD_67905     | insulator  | insulator |
| Mg1O5Se2.ICSD_402917   | insulator  | insulator |
| Mg1O5Te2.ICSD_4318     | insulator  | insulator |
| Mg1O5Ti2.ICSD_37232    | insulator  | insulator |
| Mg1O5V2.ICSD_50981     | insulator  | insulator |
| Mg1O6Pb2Te1.ICSD_86139 | insulator  | insulator |
| Mg1O6Pb2W1.ICSD_67880  | insulator  | insulator |

Supplementary Table 497. Five-fold cross validated predictions for the metal/insulator classification (489/598).

| system                  | calculated | predicted |
|-------------------------|------------|-----------|
| Mg1O6Pt1Sr3.ICSD_281299 | insulator  | insulator |
| Mg1O6Pt3.ICSD_35340     | insulator  | insulator |
| Mg1O6Re1Sr2.ICSD_182569 | metal      | metal     |
| Mg1O6Re1Sr2.ICSD_98525  | metal      | metal     |
| Mg1O6Rh1Sr3.ICSD_84738  | metal      | insulator |
| Mg1O6Sb2.ICSD_40345     | insulator  | insulator |
| Mg1O6Sr2W1.ICSD_152576  | insulator  | insulator |
| Mg1O6Sr2W1.ICSD_155308  | insulator  | insulator |
| Mg1O6Ta2.ICSD_150419    | insulator  | insulator |
| Mg1O6V2.ICSD_10391      | insulator  | insulator |
| Mg1O7Si2Sr2.ICSD_183978 | insulator  | insulator |
| Mg1P1Pd5.ICSD_642727    | metal      | metal     |
| Mg1P1Pt5.ICSD_44928     | metal      | metal     |
| Mg1P1S3.ICSD_642729     | insulator  | insulator |
| Mg1P2Si1.ICSD_22189     | insulator  | insulator |
| Mg1P4Rh6.ICSD_89610     | metal      | metal     |
| Mg1P4.ICSD_113          | insulator  | insulator |
| Mg1Pb1Sr1.ICSD_642747   | metal      | metal     |
| Mg1Pb1Yb1.ICSD_602715   | metal      | metal     |
| Mg1Pd1Pr1.ICSD_657926   | metal      | metal     |
| Mg1Pd1Sb1.ICSD_44825    | metal      | metal     |
| Mg1Pd1Sm1.ICSD_657927   | metal      | metal     |
| Mg1Pd1Y1.ICSD_54272     | metal      | metal     |
| Mg1Pd1Yb1.ICSD_412726   | metal      | metal     |
| Mg1Pd1Yb4.ICSD_423919   | metal      | metal     |
| Mg1Pd1.ICSD_104847      | metal      | metal     |
| Mg1Pd2Tb2.ICSD_412728   | metal      | metal     |
| Mg1Pd2.ICSD_150227      | metal      | metal     |
| Mg1Pd3.ICSD_150228      | metal      | metal     |
| Mg1Pd3.ICSD_153055      | metal      | metal     |
| Mg1Pm1.ICSD_161743      | metal      | metal     |
| Mg1Pr1Pt1.ICSD_412100   | metal      | metal     |
| Mg1Pr1Sn1.ICSD_182479   | metal      | metal     |
| Mg1Pr1Sn1.ICSD_183535   | metal      | metal     |
| Mg1Pr1Sn1.ICSD_183537   | metal      | metal     |
| Mg1Pr1.ICSD_104851      | metal      | metal     |
| Mg1Pt1Sb1.ICSD_44826    | metal      | metal     |
| Mg1Pt1Sm1.ICSD_412102   | metal      | metal     |
| Mg1Pt1.ICSD_109237      | metal      | metal     |
| Mg1Pt3.ICSD_104857      | metal      | metal     |
| Mg1Pu2.ICSD_109362      | metal      | metal     |
| Mg1Rh1.ICSD_104859      | metal      | metal     |
| Mg1Ru1Sn4.ICSD_412492   | metal      | metal     |
| Mg1S1.ICSD_159401       | insulator  | insulator |
| Mg1S1.ICSD_44930        | insulator  | insulator |
| Mg1S4Sc2.ICSD_37423     | insulator  | insulator |
| Mg1S4Yb2.ICSD_642803    | metal      | metal     |
| Mg1Sc1.ICSD_161737      | metal      | metal     |
| Mg1Sc2Se4.ICSD_642814   | insulator  | insulator |
| Mg1Se17U8.ICSD_601593   | insulator  | metal     |

Supplementary Table 498. Five-fold cross validated predictions for the metal/insulator classification (490/598).

| system                   | calculated | predicted |
|--------------------------|------------|-----------|
| Mg1Se1.ICSD_159398       | insulator  | insulator |
| Mg1Se1.ICSD_53946        | insulator  | insulator |
| Mg1Se1.ICSD_658986       | insulator  | insulator |
| Mg1Se2.ICSD_642815       | insulator  | insulator |
| Mg1Se4Tm2.ICSD_76051     | metal      | insulator |
| Mg1Se4Y2.ICSD_76052      | insulator  | insulator |
| Mg1Se4Yb2.ICSD_76053     | metal      | metal     |
| Mg1Si1Sr1.ICSD_42457     | metal      | metal     |
| Mg1Si1Yb1.ICSD_602717    | metal      | metal     |
| Mg1Si2Sr1.ICSD_78999     | metal      | metal     |
| Mg1Si2Yb2.ICSD_391441    | metal      | metal     |
| Mg1Sm1Tl1.ICSD_414441    | metal      | metal     |
| Mg1Sn1Sr1.ICSD_104872    | metal      | metal     |
| Mg1Sn1Tb1.ICSD_183523    | metal      | metal     |
| Mg1Sn1Yb1.ICSD_183538    | metal      | metal     |
| Mg1Sr1.ICSD_104873       | metal      | metal     |
| Mg1Tb1.ICSD_161747       | metal      | metal     |
| Mg1Tb2.ICSD_55549        | metal      | metal     |
| Mg1Te1.ICSD_168346       | insulator  | insulator |
| Mg1Te1.ICSD_168347       | insulator  | insulator |
| Mg1Te1.ICSD_168349       | insulator  | insulator |
| Mg1Te1.ICSD_642882       | insulator  | insulator |
| Mg1Te2.ICSD_41733        | insulator  | insulator |
| Mg1Tl1Y1.ICSD_414438     | metal      | metal     |
| Mg1Tl1.ICSD_104884       | metal      | metal     |
| Mg1Tm1.ICSD_104885       | metal      | metal     |
| Mg1Tm1.ICSD_104886       | metal      | metal     |
| Mg1Tm1.ICSD_161751       | metal      | metal     |
| Mg1Y1Zn1.ICSD_160907     | metal      | metal     |
| Mg1Y1.ICSD_161738        | metal      | metal     |
| Mg1Zn1.ICSD_151402       | metal      | metal     |
| Mg1Zn2.ICSD_108587       | metal      | metal     |
| Mg1Zn2.ICSD_150576       | metal      | metal     |
| Mg1Zn5.ICSD_151403       | metal      | metal     |
| Mg1.ICSD_180453          | metal      | metal     |
| Mg1.ICSD_426953          | metal      | metal     |
| Mg1.ICSD_642652          | metal      | metal     |
| Mg23Sr6.ICSD_104876      | metal      | metal     |
| Mg23Th6.ICSD_109226      | metal      | metal     |
| Mg24Tb5.ICSD_642874      | metal      | metal     |
| Mg24Y5.ICSD_109138       | metal      | metal     |
| Mg2Mn1O8P2.ICSD_100784   | insulator  | insulator |
| Mg2Mo3O12Ti2.ICSD_250400 | insulator  | insulator |
| Mg2Mo3O8.ICSD_248080     | insulator  | insulator |
| Mg2N1Na2O9P3.ICSD_186877 | insulator  | insulator |
| Mg2N2Sr1.ICSD_410826     | insulator  | insulator |
| Mg2N3P1.ICSD_27229       | insulator  | insulator |
| Mg2Nd1.ICSD_104835       | metal      | metal     |
| Mg2Nd1.ICSD_164273       | metal      | metal     |
| Mg2Nd1.ICSD_642678       | metal      | metal     |

Supplementary Table 499. Five-fold cross validated predictions for the metal/insulator classification (491/598).

| system                 | calculated | predicted |
|------------------------|------------|-----------|
| Mg2Ni1.ICSD_30713      | metal      | metal     |
| Mg2Ni3P1.ICSD_72409    | metal      | metal     |
| Mg2Ni3Si1.ICSD_44926   | metal      | metal     |
| Mg2O12P4.ICSD_4280     | insulator  | insulator |
| Mg2O4Si1.ICSD_171065   | insulator  | insulator |
| Mg2O4Si1.ICSD_27533    | insulator  | insulator |
| Mg2O4Si1.ICSD_27534    | insulator  | insulator |
| Mg2O4Si1.ICSD_27535    | insulator  | insulator |
| Mg2O4Si1.ICSD_27536    | insulator  | insulator |
| Mg2O4Si1.ICSD_27537    | insulator  | insulator |
| Mg2O4Si1.ICSD_83783    | insulator  | insulator |
| Mg2O4Si1.ICSD_83792    | insulator  | insulator |
| Mg2O4Sn1.ICSD_187038   | insulator  | insulator |
| Mg2O4V1.ICSD_76980     | metal      | insulator |
| Mg2O7P2.ICSD_22328     | insulator  | insulator |
| Mg2O7V2.ICSD_2321      | insulator  | insulator |
| Mg2O8Te3.ICSD_424305   | insulator  | insulator |
| Mg2P2Se6.ICSD_642731   | insulator  | insulator |
| Mg2Pb1.ICSD_409428     | metal      | metal     |
| Mg2Pb1.ICSD_642744     | metal      | metal     |
| Mg2Pd1Sr1.ICSD_425493  | metal      | metal     |
| Mg2Pd1.ICSD_409837     | metal      | metal     |
| Mg2Pr1.ICSD_104853     | metal      | metal     |
| Mg2Pt1Si1.ICSD_68513   | metal      | metal     |
| Mg2Pt1.ICSD_245120     | metal      | metal     |
| Mg2Rh1.ICSD_54254      | metal      | metal     |
| Mg2S4Si1.ICSD_642791   | insulator  | insulator |
| Mg2S4Sn1.ICSD_642793   | insulator  | insulator |
| Mg2Sb2Sr1.ICSD_100046  | insulator  | insulator |
| Mg2Sb2Yb1.ICSD_412655  | insulator  | insulator |
| Mg2Se4Si1.ICSD_642818  | insulator  | insulator |
| Mg2Se4Sn1.ICSD_642819  | insulator  | insulator |
| Mg2Si10Sr11.ICSD_50001 | metal      | metal     |
| Mg2Si1.ICSD_108584     | metal      | metal     |
| Mg2Si1.ICSD_167512     | metal      | metal     |
| Mg2Si1.ICSD_181102     | metal      | metal     |
| Mg2Si1.ICSD_657540     | insulator  | metal     |
| Mg2Sm1.ICSD_104867     | metal      | metal     |
| Mg2Sn1.ICSD_104869     | metal      | metal     |
| Mg2Sn1.ICSD_181766     | metal      | metal     |
| Mg2Sn1.ICSD_182695     | metal      | metal     |
| Mg2Sr1.ICSD_642864     | metal      | metal     |
| Mg2Tb1.ICSD_642872     | metal      | metal     |
| Mg2Th1.ICSD_104883     | metal      | metal     |
| Mg2Th1.ICSD_150498     | metal      | metal     |
| Mg2Th1.ICSD_150630     | metal      | metal     |
| Mg2Tm1.ICSD_380503     | metal      | metal     |
| Mg2Tm1.ICSD_55551      | metal      | metal     |
| Mg2Y1.ICSD_642903      | metal      | metal     |
| Mg2Yb1.ICSD_412666     | metal      | metal     |

Supplementary Table 500. Five-fold cross validated predictions for the metal/insulator classification (492/598).

| system                  | calculated | predicted |
|-------------------------|------------|-----------|
| Mg2Zn11.ICSD.104898     | metal      | metal     |
| Mg3Mn1Ni2.ICSD.182431   | metal      | metal     |
| Mg3Mn2O12Si3.ICSD.27374 | insulator  | insulator |
| Mg3N2.ICSD.408145       | insulator  | insulator |
| Mg3Nb6O11.ICSD.62662    | insulator  | insulator |
| Mg3Nd1.ICSD.54271       | metal      | metal     |
| Mg3Ni20P6.ICSD.72350    | metal      | metal     |
| Mg3Ni2Ti1.ICSD.187996   | metal      | metal     |
| Mg3O12Si3V2.ICSD.27372  | metal      | insulator |
| Mg3O6Te1.ICSD.6309      | insulator  | insulator |
| Mg3O8P2.ICSD.261231     | insulator  | insulator |
| Mg3O8P2.ICSD.9849       | metal      | insulator |
| Mg3O8V2.ICSD.21085      | insulator  | insulator |
| Mg3P2.ICSD.24489        | insulator  | insulator |
| Mg3P2.ICSD.642724       | insulator  | insulator |
| Mg3Pd1.ICSD.409824      | metal      | metal     |
| Mg3Pd1.ICSD.642752      | metal      | metal     |
| Mg3Pr1.ICSD.104854      | metal      | metal     |
| Mg3Pr1.ICSD.642770      | metal      | metal     |
| Mg3Pt1.ICSD.104858      | metal      | metal     |
| Mg3Pt1.ICSD.54253       | metal      | metal     |
| Mg3Rh1.ICSD.413720      | metal      | metal     |
| Mg3Ru2.ICSD.104862      | metal      | metal     |
| Mg3Sb2.ICSD.181285      | insulator  | insulator |
| Mg3Sb2.ICSD.52335       | insulator  | insulator |
| Mg3Sm1.ICSD.104868      | metal      | metal     |
| Mg3Sm1.ICSD.642837      | metal      | metal     |
| Mg3Tb1.ICSD.642871      | metal      | metal     |
| Mg4N12P6S1.ICSD.642665  | insulator  | insulator |
| Mg4Nb2O9.ICSD.91748     | insulator  | insulator |
| Mg4O9Ta2.ICSD.65301     | insulator  | insulator |
| Mg4P6Rh7.ICSD.94390     | metal      | metal     |
| Mg4Sr1.ICSD.104874      | metal      | metal     |
| Mg5Na2O16P4.ICSD.75271  | insulator  | insulator |
| Mg5Pd10Si16.ICSD.95899  | metal      | metal     |
| Mg5Pd2.ICSD.150567      | metal      | metal     |
| Mg5Pt10Si16.ICSD.95900  | metal      | metal     |
| Mg5Rh2.ICSD.104860      | metal      | metal     |
| Mg5Si6.ICSD.54780       | metal      | metal     |
| Mg5Si6.ICSD.85529       | metal      | metal     |
| Mg5Ti2.ICSD.150631      | metal      | metal     |
| Mg6Mn1O8.ICSD.76174     | insulator  | insulator |
| Mg6Ni16Si7.ICSD.159261  | metal      | metal     |
| Mg6Si3.3.ICSD.157682    | metal      | metal     |
| Mg9Sn5.ICSD.55577       | metal      | metal     |
| Mn0.25Nb1S2.ICSD.42655  | metal      | metal     |
| Mn0.25S2Ta1.ICSD.42660  | metal      | metal     |
| Mn11Pd21.ICSD.130005    | metal      | metal     |
| Mn12Th1.ICSD.104986     | metal      | metal     |
| Mn12Y1.ICSD.26821       | metal      | metal     |

Supplementary Table 501. Five-fold cross validated predictions for the metal/insulator classification (493/598).

| system                    | calculated | predicted |
|---------------------------|------------|-----------|
| Mn12Y1.ICSD.643911        | metal      | metal     |
| Mn1Mo1N2.ICSD.81489       | insulator  | metal     |
| Mn1Mo1O4.ICSD.15615       | insulator  | insulator |
| Mn1Mo1O4.ICSD.61078       | insulator  | insulator |
| Mn1Mo1O6Sr2.ICSD.187667   | metal      | metal     |
| Mn1Mo1O6Sr2.ICSD.187669   | metal      | insulator |
| Mn1Mo1O6Sr2.ICSD.99088    | metal      | metal     |
| Mn1Mo1O6Te1.ICSD.163979   | insulator  | insulator |
| Mn1N1.ICSD.106932         | metal      | metal     |
| Mn1N1.ICSD.184928         | metal      | metal     |
| Mn1N2O6.ICSD.412003       | insulator  | insulator |
| Mn1N2Si1.ICSD.172194      | insulator  | metal     |
| Mn1N2Si1.ICSD.200019      | metal      | insulator |
| Mn1N2W1.ICSD.80029        | metal      | metal     |
| Mn1N3Sr3.ICSD.80772       | metal      | metal     |
| Mn1N3Th2.ICSD.87243       | metal      | metal     |
| Mn1Na1Nd1O6W1.ICSD.159098 | insulator  | insulator |
| Mn1Na1O2.ICSD.155330      | insulator  | insulator |
| Mn1Na1O2.ICSD.16271       | insulator  | insulator |
| Mn1Na1O4Rb2.ICSD.170771   | insulator  | insulator |
| Mn1Na1O4V1.ICSD.260949    | insulator  | insulator |
| Mn1Na1O6Si2.ICSD.62513    | insulator  | insulator |
| Mn1Na1O6Tb1W1.ICSD.159099 | insulator  | insulator |
| Mn1Na1P1.ICSD.601595      | metal      | metal     |
| Mn1Na1Sb1.ICSD.601596     | metal      | metal     |
| Mn1Na1Se2.ICSD.50818      | metal      | insulator |
| Mn1Na1Te2.ICSD.110774     | metal      | metal     |
| Mn1Na2O4.ICSD.39504       | insulator  | insulator |
| Mn1Na2O7P2.ICSD.86669     | insulator  | insulator |
| Mn1Na2O8S2.ICSD.249878    | metal      | insulator |
| Mn1Na6O4.ICSD.420410      | insulator  | insulator |
| Mn1Na6S4.ICSD.95067       | insulator  | insulator |
| Mn1Na6Se4.ICSD.65449      | insulator  | insulator |
| Mn1Na6Te4.ICSD.65451      | insulator  | insulator |
| Mn1Nb1O6Sr2.ICSD.181751   | metal      | metal     |
| Mn1Nb1P1.ICSD.68280       | metal      | metal     |
| Mn1Nb1Si1.ICSD.24185      | metal      | metal     |
| Mn1Nb2O6.ICSD.31944       | insulator  | insulator |
| Mn1Nb2O8Zn2.ICSD.202667   | insulator  | insulator |
| Mn1Nb2S4.ICSD.643015      | metal      | metal     |
| Mn1Nb3O6.ICSD.89477       | metal      | insulator |
| Mn1Nb3S6.ICSD.104913      | metal      | metal     |
| Mn1Nb4Se8.ICSD.643025     | metal      | metal     |
| Mn1Nd1O1P1.ICSD.50241     | metal      | metal     |
| Mn1Nd1O1Sb1.ICSD.50243    | metal      | metal     |
| Mn1Nd1Si1.ICSD.643062     | metal      | metal     |
| Mn1Nd1Si1.ICSD.75056      | metal      | metal     |
| Mn1Nd1Si1.ICSD.75057      | metal      | metal     |
| Mn1Nd1Si1.ICSD.85851      | metal      | metal     |
| Mn1Nd1Si2.ICSD.643055     | metal      | metal     |

Supplementary Table 502. Five-fold cross validated predictions for the metal/insulator classification (494/598).

| system                 | calculated | predicted |
|------------------------|------------|-----------|
| Mn1Nd1Si2.ICSD.85927   | metal      | metal     |
| Mn1Ni1O3.ICSD.31853    | insulator  | insulator |
| Mn1Ni1P1.ICSD.161714   | metal      | metal     |
| Mn1Ni1P1.ICSD.600852   | metal      | metal     |
| Mn1Ni1P1.ICSD.643091   | metal      | metal     |
| Mn1Ni1P1.ICSD.643093   | metal      | metal     |
| Mn1Ni1Sb1.ICSD.161717  | metal      | metal     |
| Mn1Ni1Sb1.ICSD.643120  | metal      | metal     |
| Mn1Ni1Si1.ICSD.108590  | metal      | metal     |
| Mn1Ni1Si1.ICSD.161713  | metal      | metal     |
| Mn1Ni1Si1.ICSD.165241  | metal      | metal     |
| Mn1Ni1Si1.ICSD.643132  | metal      | metal     |
| Mn1Ni1Si1.ICSD.76084   | metal      | metal     |
| Mn1Ni1.ICSD.104917     | metal      | metal     |
| Mn1Ni2Sb1.ICSD.76080   | metal      | metal     |
| Mn1Ni2Sn1.ICSD.104927  | metal      | metal     |
| Mn1Ni3.ICSD.104920     | metal      | metal     |
| Mn1Ni4Y1.ICSD.643173   | metal      | metal     |
| Mn1Ni6O8.ICSD.40584    | insulator  | metal     |
| Mn1O1.ICSD.262928      | metal      | metal     |
| Mn1O1.ICSD.643192      | metal      | metal     |
| Mn1O2.6Sr1.ICSD.159660 | metal      | metal     |
| Mn1O2.ICSD.150462      | insulator  | insulator |
| Mn1O2.ICSD.171866      | insulator  | insulator |
| Mn1O2.ICSD.20227       | insulator  | metal     |
| Mn1O2.ICSD.54114       | metal      | insulator |
| Mn1O2.ICSD.643187      | metal      | insulator |
| Mn1O3Se1.ICSD.495      | insulator  | insulator |
| Mn1O3Sn1.ICSD.29203    | insulator  | insulator |
| Mn1O3Sr1.ICSD.157936   | insulator  | insulator |
| Mn1O3Sr1.ICSD.185417   | insulator  | insulator |
| Mn1O3Sr1.ICSD.188415   | metal      | metal     |
| Mn1O3Sr1.ICSD.202615   | insulator  | insulator |
| Mn1O3Tb1.ICSD.180803   | metal      | insulator |
| Mn1O3Ti1.ICSD.171579   | insulator  | insulator |
| Mn1O3Ti1.ICSD.184650   | insulator  | insulator |
| Mn1O3Y1.ICSD.166217    | metal      | metal     |
| Mn1O3Y1.ICSD.181182    | metal      | metal     |
| Mn1O3Y1.ICSD.422986    | metal      | insulator |
| Mn1O4P1Rb1.ICSD.157359 | insulator  | insulator |
| Mn1O4P1.ICSD.99859     | insulator  | insulator |
| Mn1O4Pb2.ICSD.33990    | insulator  | insulator |
| Mn1O4Rb1V1.ICSD.246201 | insulator  | insulator |
| Mn1O4Rb1.ICSD.89507    | insulator  | insulator |
| Mn1O4Rb2.ICSD.79083    | insulator  | insulator |
| Mn1O4Re1.ICSD.170685   | metal      | insulator |
| Mn1O4Rh2.ICSD.109300   | metal      | insulator |
| Mn1O4S1.ICSD.27648     | insulator  | insulator |
| Mn1O4Sb2.ICSD.60407    | insulator  | insulator |
| Mn1O4Se1.ICSD.109071   | insulator  | insulator |

Supplementary Table 503. Five-fold cross validated predictions for the metal/insulator classification (495/598).

| system                  | calculated | predicted |
|-------------------------|------------|-----------|
| Mn1O4Sr2.ICSD.26560     | metal      | metal     |
| Mn1O4Ti2.ICSD.22383     | metal      | metal     |
| Mn1O4U1.ICSD.26938      | insulator  | insulator |
| Mn1O4V2.ICSD.109148     | metal      | metal     |
| Mn1O4W1.ICSD.67926      | insulator  | insulator |
| Mn1O5Se2.ICSD.27518     | insulator  | insulator |
| Mn1O5Se2.ICSD.73936     | insulator  | insulator |
| Mn1O5Si2.ICSD.85554     | insulator  | insulator |
| Mn1O5Te2.ICSD.15844     | insulator  | insulator |
| Mn1O6Pb2Re1.ICSD.182001 | metal      | metal     |
| Mn1O6Pt3.ICSD.35337     | insulator  | insulator |
| Mn1O6Sb1Sr2.ICSD.39351  | insulator  | insulator |
| Mn1O6Sb2.ICSD.202952    | insulator  | insulator |
| Mn1O6Se2.ICSD.69801     | insulator  | insulator |
| Mn1O6Sr2Zr1.ICSD.164699 | insulator  | metal     |
| Mn1O6Ta2.ICSD.15857     | insulator  | insulator |
| Mn1O6V2.ICSD.40850      | insulator  | insulator |
| Mn1O7Si2Sr2.ICSD.261227 | insulator  | insulator |
| Mn1O7Te1V2.ICSD.59328   | insulator  | insulator |
| Mn1O8Re2.ICSD.51014     | insulator  | insulator |
| Mn1O8Ta2Zn2.ICSD.85042  | insulator  | insulator |
| Mn1P1Rb1.ICSD.643229    | metal      | metal     |
| Mn1P1Rh1.ICSD.643230    | metal      | metal     |
| Mn1P1S3.ICSD.643231     | insulator  | insulator |
| Mn1P1Se3.ICSD.54140     | insulator  | insulator |
| Mn1P1Ta1.ICSD.85947     | metal      | metal     |
| Mn1P1Zr1.ICSD.76095     | metal      | metal     |
| Mn1P1.ICSD.30412        | metal      | metal     |
| Mn1P1.ICSD.643200       | metal      | metal     |
| Mn1P2Rb2S6.ICSD.280907  | insulator  | insulator |
| Mn1P4.ICSD.1829         | insulator  | insulator |
| Mn1Pb1Rh2.ICSD.104936   | metal      | metal     |
| Mn1Pd1Sb1.ICSD.76099    | metal      | metal     |
| Mn1Pd1Te1.ICSD.40908    | metal      | metal     |
| Mn1Pd1Te1.ICSD.44996    | metal      | metal     |
| Mn1Pd1.ICSD.104938      | metal      | metal     |
| Mn1Pd1.ICSD.104940      | metal      | metal     |
| Mn1Pd2Sb1.ICSD.643312   | metal      | metal     |
| Mn1Pd2Sn1.ICSD.643327   | metal      | metal     |
| Mn1Pd2.ICSD.247774      | metal      | metal     |
| Mn1Pd3.ICSD.104941      | metal      | metal     |
| Mn1Pr1Si1.ICSD.75052    | metal      | metal     |
| Mn1Pr1Si1.ICSD.75053    | metal      | metal     |
| Mn1Pr1Si1.ICSD.75054    | metal      | metal     |
| Mn1Pr1Si2.ICSD.643350   | metal      | metal     |
| Mn1Pt1Sb1.ICSD.643376   | metal      | metal     |
| Mn1Pt1Sb1.ICSD.643377   | metal      | metal     |
| Mn1Pt1Sn1.ICSD.104955   | metal      | metal     |
| Mn1Pt1Sn1.ICSD.643387   | metal      | metal     |
| Mn1Pt1.ICSD.104949      | metal      | metal     |

Supplementary Table 504. Five-fold cross validated predictions for the metal/insulator classification (496/598).

| system                   | calculated | predicted |
|--------------------------|------------|-----------|
| Mn1Pt3.ICSD_104951       | metal      | metal     |
| Mn1Rb1Sb1.ICSD_643395    | insulator  | metal     |
| Mn1Rb1Se2.ICSD_50819     | metal      | insulator |
| Mn1Rb1Te2.ICSD_87984     | metal      | metal     |
| Mn1Rb2S2.ICSD_65454      | insulator  | insulator |
| Mn1Rb2Se2.ICSD_65457     | insulator  | insulator |
| Mn1Rb2Te2.ICSD_65460     | insulator  | insulator |
| Mn1Rh1Sb1.ICSD_76199     | metal      | metal     |
| Mn1Rh1Sb1.ICSD_76201     | metal      | metal     |
| Mn1Rh1Si1.ICSD_76203     | metal      | metal     |
| Mn1Rh1.ICSD_104960       | metal      | metal     |
| Mn1Rh2Sb1.ICSD_76202     | metal      | metal     |
| Mn1Rh2Sn1.ICSD_643428    | metal      | metal     |
| Mn1S17U8.ICSD_643484     | insulator  | insulator |
| Mn1S1.ICSD_44764         | metal      | insulator |
| Mn1S1.ICSD_643445        | insulator  | insulator |
| Mn1S1.ICSD_643455        | insulator  | insulator |
| Mn1S1.ICSD_76205         | insulator  | insulator |
| Mn1S2.ICSD_36545         | insulator  | insulator |
| Mn1S2.ICSD_643441        | insulator  | insulator |
| Mn1S4Sb2.ICSD_411178     | insulator  | insulator |
| Mn1S4Sc2.ICSD_37424      | insulator  | insulator |
| Mn1S4Yb2.ICSD_643495     | metal      | metal     |
| Mn1S6Ta3.ICSD_643472     | metal      | metal     |
| Mn1S8Ti1V4.ICSD_643478   | metal      | insulator |
| Mn1Sb1.ICSD_53970        | metal      | metal     |
| Mn1Sc1Si1.ICSD_86369     | metal      | metal     |
| Mn1Sc2Se4.ICSD_74407     | insulator  | insulator |
| Mn1Se1.ICSD_24252        | insulator  | insulator |
| Mn1Se1.ICSD_643569       | insulator  | insulator |
| Mn1Se1.ICSD_643594       | insulator  | insulator |
| Mn1Se1.ICSD_76218        | insulator  | insulator |
| Mn1Se2.ICSD_24020        | insulator  | insulator |
| Mn1Se3Th1.ICSD_99582     | insulator  | metal     |
| Mn1Se4Yb2.ICSD_76225     | metal      | metal     |
| Mn1Si1Sm1.ICSD_643651    | metal      | metal     |
| Mn1Si1Ta1.ICSD_643653    | metal      | metal     |
| Mn1Si1Tb1.ICSD_88060     | metal      | metal     |
| Mn1Si1Ti1.ICSD_643671    | metal      | metal     |
| Mn1Si1Ti2.ICSD_189703    | metal      | metal     |
| Mn1Si1Y1.ICSD_643705     | metal      | metal     |
| Mn1Si1Yb1.ICSD_95000     | metal      | metal     |
| Mn1Si1Zr1.ICSD_643708    | metal      | metal     |
| Mn1Si1.ICSD_643618       | metal      | metal     |
| Mn1Si2Ti1.ICSD_31991     | metal      | metal     |
| Mn1Sn1Sr1.ICSD_66951     | metal      | metal     |
| Mn1Sn1Te4Ti2.ICSD_172507 | insulator  | insulator |
| Mn1Sn1Ti2.ICSD_189709    | metal      | metal     |
| Mn1Sn2.ICSD_102799       | metal      | metal     |
| Mn1Sn2.ICSD_24571        | metal      | metal     |

Supplementary Table 505. Five-fold cross validated predictions for the metal/insulator classification (497/598).

| system                  | calculated | predicted |
|-------------------------|------------|-----------|
| Mn1Te1.ICSD_181324      | insulator  | metal     |
| Mn1Te1.ICSD_643793      | metal      | metal     |
| Mn1Te1.ICSD_643799      | insulator  | metal     |
| Mn1Te1.ICSD_76240       | metal      | insulator |
| Mn1Te2.ICSD_643803      | metal      | metal     |
| Mn1U6.ICSD_150486       | metal      | metal     |
| Mn1V1.ICSD_643868       | metal      | metal     |
| Mn1Zn1.ICSD_105017      | metal      | metal     |
| Mn1Zn3.ICSD_105020      | metal      | metal     |
| Mn1.ICSD_164349         | metal      | metal     |
| Mn1.ICSD_41509          | metal      | metal     |
| Mn1.ICSD_41775          | metal      | metal     |
| Mn23Nd6.ICSD_602440     | metal      | metal     |
| Mn23Pr6.ICSD_643337     | metal      | metal     |
| Mn23Tb6.ICSD_643774     | metal      | metal     |
| Mn23Th6.ICSD_104987     | metal      | metal     |
| Mn23Y6.ICSD_105008      | metal      | metal     |
| Mn23Y6.ICSD_105010      | metal      | metal     |
| Mn23Yb6.ICSD_643920     | metal      | metal     |
| Mn2Mo3O8.ICSD_10144     | insulator  | insulator |
| Mn2Mo3O8.ICSD_248082    | insulator  | insulator |
| Mn2Na14O9.ICSD_1563     | insulator  | insulator |
| Mn2Na2O3.ICSD_409981    | insulator  | insulator |
| Mn2Na2S3.ICSD_36209     | insulator  | insulator |
| Mn2Na2Se3.ICSD_50820    | insulator  | insulator |
| Mn2Na4O5.ICSD_1026      | metal      | insulator |
| Mn2Nb1.ICSD_643006      | metal      | metal     |
| Mn2Nb1.ICSD_643008      | metal      | metal     |
| Mn2Nb1.ICSD_643010      | metal      | metal     |
| Mn2Nb1.ICSD_643012      | metal      | metal     |
| Mn2Nd1Si2.ICSD_54942    | metal      | metal     |
| Mn2Nd1Si2.ICSD_658306   | metal      | metal     |
| Mn2Nd1Si2.ICSD_72478    | metal      | metal     |
| Mn2Nd1Si2.ICSD_72479    | metal      | metal     |
| Mn2Nd1.ICSD_108589      | metal      | metal     |
| Mn2Ni1O4.ICSD_201398    | metal      | metal     |
| Mn2O12P4.ICSD_412558    | insulator  | insulator |
| Mn2O12Rb2S3.ICSD_172522 | insulator  | insulator |
| Mn2O14P4Si1.ICSD_412559 | insulator  | insulator |
| Mn2O3Ta1.ICSD_15995     | metal      | metal     |
| Mn2O3.ICSD_159865       | metal      | insulator |
| Mn2O4Si1.ICSD_88026     | insulator  | insulator |
| Mn2O4Ti1.ICSD_22313     | insulator  | insulator |
| Mn2O4Zn1.ICSD_39196     | insulator  | insulator |
| Mn2O5Pr1.ICSD_84351     | insulator  | insulator |
| Mn2O5Sr2.ICSD_417812    | metal      | metal     |
| Mn2O5Y1.ICSD_159271     | insulator  | insulator |
| Mn2O6Rb6.ICSD_245999    | insulator  | insulator |
| Mn2O7P2.ICSD_47137      | insulator  | insulator |
| Mn2O7Sb2.ICSD_247301    | metal      | insulator |

Supplementary Table 506. Five-fold cross validated predictions for the metal/insulator classification (498/598).

| system                 | calculated | predicted |
|------------------------|------------|-----------|
| Mn2O7Sc2.ICSD.83277    | insulator  | insulator |
| Mn2O7Ti2.ICSD.83268    | metal      | insulator |
| Mn2O7V2.ICSD.81994     | insulator  | insulator |
| Mn2O7Y2.ICSD.202516    | insulator  | insulator |
| Mn2O8Te3.ICSD.82490    | insulator  | insulator |
| Mn2O9Pb2Si2.ICSD.31846 | insulator  | insulator |
| Mn2P1.ICSD.643211      | metal      | metal     |
| Mn2P1.ICSD.643215      | metal      | metal     |
| Mn2P1.ICSD.643223      | metal      | metal     |
| Mn2P2Sr1.ICSD.49019    | metal      | metal     |
| Mn2P2Sr1.ICSD.77669    | metal      | metal     |
| Mn2Pr1Si2.ICSD.86256   | metal      | metal     |
| Mn2Pu1Si2.ICSD.604299  | metal      | metal     |
| Mn2Pu1.ICSD.643390     | metal      | metal     |
| Mn2Ru1Si1.ICSD.182830  | metal      | metal     |
| Mn2Ru1Sn1.ICSD.182829  | metal      | metal     |
| Mn2S4Si1.ICSD.643464   | insulator  | insulator |
| Mn2S4Sn1.ICSD.78760    | metal      | insulator |
| Mn2S4Zn1.ICSD.643504   | metal      | insulator |
| Mn2Sb1.ICSD.163332     | metal      | metal     |
| Mn2Sb1.ICSD.184948     | metal      | metal     |
| Mn2Sb1.ICSD.643526     | metal      | metal     |
| Mn2Sb1.ICSD.643534     | metal      | metal     |
| Mn2Sb2Sr1.ICSD.416094  | metal      | metal     |
| Mn2Sb2Sr1.ICSD.41790   | metal      | metal     |
| Mn2Sb2Yb1.ICSD.154766  | metal      | metal     |
| Mn2Sc1.ICSD.169435     | metal      | metal     |
| Mn2Se4Si1.ICSD.643595  | insulator  | insulator |
| Mn2Se4Sn1.ICSD.643596  | insulator  | insulator |
| Mn2Se4Zn1.ICSD.643609  | metal      | insulator |
| Mn2Si2Tb1.ICSD.106811  | metal      | metal     |
| Mn2Si2Th1.ICSD.41977   | metal      | metal     |
| Mn2Si2U1.ICSD.643683   | metal      | metal     |
| Mn2Si2U1.ICSD.643685   | metal      | metal     |
| Mn2Si2U1.ICSD.656522   | metal      | metal     |
| Mn2Si2Y1.ICSD.86263    | metal      | metal     |
| Mn2Si2Yb1.ICSD.106814  | metal      | metal     |
| Mn2Sn1Te4.ICSD.169812  | metal      | metal     |
| Mn2Sn1W1.ICSD.104980   | metal      | metal     |
| Mn2Sn1.ICSD.104977     | metal      | metal     |
| Mn2Sn1.ICSD.643735     | metal      | metal     |
| Mn2Sn1.ICSD.643741     | metal      | metal     |
| Mn2Sn5Yb4.ICSD.419134  | metal      | metal     |
| Mn2Ta1.ICSD.643761     | metal      | metal     |
| Mn2Ta1.ICSD.643763     | metal      | metal     |
| Mn2Ta1.ICSD.643764     | metal      | metal     |
| Mn2Tb1.ICSD.104982     | metal      | metal     |
| Mn2Tb1.ICSD.54278      | metal      | metal     |
| Mn2Tb1.ICSD.602123     | metal      | metal     |
| Mn2Te4Zn1.ICSD.643810  | metal      | metal     |

Supplementary Table 507. Five-fold cross validated predictions for the metal/insulator classification (499/598).

| system                 | calculated | predicted |
|------------------------|------------|-----------|
| Mn2Th1.ICSD.604013     | metal      | metal     |
| Mn2Th1.ICSD.643817     | metal      | metal     |
| Mn2Ti1.ICSD.104989     | metal      | metal     |
| Mn2Ti1.ICSD.109270     | metal      | metal     |
| Mn2Ti1.ICSD.643823     | metal      | metal     |
| Mn2Ti1.ICSD.643824     | metal      | metal     |
| Mn2Ti1.ICSD.643834     | metal      | metal     |
| Mn2Tm1.ICSD.104994     | metal      | metal     |
| Mn2U1.ICSD.104995      | metal      | metal     |
| Mn2U1.ICSD.104996      | metal      | metal     |
| Mn2U1.ICSD.643857      | metal      | metal     |
| Mn2Y1.ICSD.54374       | metal      | metal     |
| Mn2Y1.ICSD.603250      | metal      | metal     |
| Mn2Y1.ICSD.643877      | metal      | metal     |
| Mn2Y1.ICSD.643915      | metal      | metal     |
| Mn2Zr1.ICSD.109269     | metal      | metal     |
| Mn2Zr1.ICSD.246490     | metal      | metal     |
| Mn2Zr1.ICSD.643937     | metal      | metal     |
| Mn2Zr1.ICSD.643942     | metal      | metal     |
| Mn3N1Ni1.ICSD.76056    | metal      | metal     |
| Mn3N1Pd1.ICSD.76057    | metal      | metal     |
| Mn3N1Pt1.ICSD.76058    | metal      | metal     |
| Mn3N1Rh1.ICSD.642970   | metal      | metal     |
| Mn3N1Rh1.ICSD.76060    | metal      | metal     |
| Mn3N1Sn1.ICSD.76062    | metal      | metal     |
| Mn3N1Ta3.ICSD.642979   | metal      | metal     |
| Mn3N1Zn1.ICSD.76070    | metal      | metal     |
| Mn3N2.ICSD.84202       | metal      | metal     |
| Mn3Na2O7.ICSD.92858    | insulator  | insulator |
| Mn3Nb6O11.ICSD.62661   | insulator  | metal     |
| Mn3Ni20P6.ICSD.72351   | metal      | metal     |
| Mn3Ni2Si1.ICSD.20441   | metal      | metal     |
| Mn3O10Sr4.ICSD.40301   | insulator  | insulator |
| Mn3O12Si3V2.ICSD.27380 | metal      | insulator |
| Mn3O1Ti3.ICSD.29052    | metal      | metal     |
| Mn3O4.ICSD.188902      | metal      | metal     |
| Mn3O4.ICSD.188903      | metal      | metal     |
| Mn3O4.ICSD.68174       | insulator  | metal     |
| Mn3O6Te1.ICSD.245054   | insulator  | insulator |
| Mn3O6W1.ICSD.74952     | insulator  | insulator |
| Mn3O8P2.ICSD.415107    | metal      | insulator |
| Mn3O8V2.ICSD.422975    | insulator  | insulator |
| Mn3P1.ICSD.643224      | metal      | metal     |
| Mn3P6Pd20.ICSD.156065  | metal      | metal     |
| Mn3P6Pd20.ICSD.156066  | metal      | metal     |
| Mn3Pt1.ICSD.104953     | metal      | metal     |
| Mn3Rb2Se4.ICSD.78931   | metal      | insulator |
| Mn3Rh1.ICSD.104961     | metal      | metal     |
| Mn3Rh1.ICSD.104962     | metal      | metal     |
| Mn3Sb1.ICSD.163333     | metal      | metal     |

Supplementary Table 508. Five-fold cross validated predictions for the metal/insulator classification (500/598).

| system                   | calculated | predicted |
|--------------------------|------------|-----------|
| Mn3Si1.ICSD_643621       | metal      | metal     |
| Mn3Si3V2.ICSD_643689     | metal      | metal     |
| Mn3Sn1.ICSD_188333       | metal      | metal     |
| Mn3Sn1.ICSD_643730       | metal      | metal     |
| Mn3Sn2.ICSD_55622        | metal      | metal     |
| Mn4N1.ICSD_44369         | metal      | metal     |
| Mn4N1.ICSD_642956        | metal      | metal     |
| Mn4Na3Te6.ICSD_87985     | metal      | metal     |
| Mn4Nb2O9.ICSD_29216      | insulator  | insulator |
| Mn4Nb2Si5.ICSD_643027    | metal      | metal     |
| Mn4O7Si1.ICSD_36273      | insulator  | insulator |
| Mn4Si5Ta2.ICSD_76230     | metal      | metal     |
| Mn4Si7.ICSD_183036       | insulator  | metal     |
| Mn56Yb2.ICSD_643923      | metal      | metal     |
| Mn5O12Si3.ICSD_27382     | metal      | insulator |
| Mn5O16Pb3V2.ICSD_95653   | insulator  | insulator |
| Mn5O8V1.ICSD_262806      | insulator  | insulator |
| Mn5O8V1.ICSD_262807      | insulator  | insulator |
| Mn5O8.ICSD_16956         | insulator  | insulator |
| Mn5Si3.ICSD_24359        | metal      | metal     |
| Mn5Si3.ICSD_33713        | metal      | metal     |
| Mn5Si3.ICSD_643622       | metal      | metal     |
| Mn5Si3.ICSD_643628       | metal      | metal     |
| Mn6Ni16P7.ICSD_35466     | metal      | metal     |
| Mn6Ni16Si7.ICSD_162574   | metal      | metal     |
| Mn6Sc1Sn6.ICSD_54273     | metal      | metal     |
| Mn6Sc1Sn6.ICSD_643563    | metal      | metal     |
| Mn6Sn6Tb1.ICSD_54277     | metal      | metal     |
| Mn6Sn6Tb1.ICSD_643748    | metal      | metal     |
| Mn6Sn6Tm1.ICSD_107455    | metal      | metal     |
| Mn6Sn6Y1.ICSD_240144     | metal      | metal     |
| Mn6Sn6Y1.ICSD_240146     | metal      | metal     |
| Mn6Sn6Zr1.ICSD_54929     | metal      | metal     |
| Mn7Na1O12.ICSD_19022     | metal      | metal     |
| Mn7O12Pb1.ICSD_262742    | metal      | insulator |
| Mo1.33Ru0.67.ICSD_644234 | metal      | metal     |
| Mo12Rb2Se14.ICSD_89004   | metal      | metal     |
| Mo13P9U1.ICSD_94407      | metal      | metal     |
| Mo15Se19.ICSD_69004      | metal      | metal     |
| Mo1N1Na3O3.ICSD_98673    | insulator  | insulator |
| Mo1N1Na5O4.ICSD_55113    | insulator  | insulator |
| Mo1N1Ta1.ICSD_100437     | metal      | metal     |
| Mo1N1.ICSD_106926        | metal      | metal     |
| Mo1N1.ICSD_159438        | metal      | metal     |
| Mo1N1.ICSD_159439        | metal      | metal     |
| Mo1N1.ICSD_159442        | metal      | metal     |
| Mo1N1.ICSD_168364        | metal      | metal     |
| Mo1N1.ICSD_168369        | metal      | metal     |
| Mo1N1.ICSD_168372        | metal      | metal     |
| Mo1N1.ICSD_185560        | metal      | metal     |

Supplementary Table 509. Five-fold cross validated predictions for the metal/insulator classification (501/598).

| system                  | calculated | predicted |
|-------------------------|------------|-----------|
| Mo1N1.ICSD_43559        | metal      | metal     |
| Mo1N1.ICSD_45000        | metal      | metal     |
| Mo1N1.ICSD_60168        | metal      | metal     |
| Mo1N2Na4O2.ICSD_73102   | insulator  | insulator |
| Mo1N3Na3.ICSD_67565     | insulator  | insulator |
| Mo1Na1O2.ICSD_166514    | metal      | insulator |
| Mo1Na1O5Sb1.ICSD_413147 | insulator  | insulator |
| Mo1Na2O12Te4.ICSD_88010 | insulator  | insulator |
| Mo1Na2O4.ICSD_151971    | insulator  | insulator |
| Mo1Na2O4.ICSD_44523     | insulator  | insulator |
| Mo1Na2O6Se1.ICSD_412998 | insulator  | insulator |
| Mo1Na4O5.ICSD_411635    | insulator  | insulator |
| Mo1Ni1O4.ICSD_174488    | insulator  | insulator |
| Mo1Ni1O4.ICSD_81059     | insulator  | insulator |
| Mo1Ni1O4.ICSD_81060     | insulator  | insulator |
| Mo1Ni1O6Sr2.ICSD_155733 | insulator  | insulator |
| Mo1Ni1O6Sr2.ICSD_157021 | insulator  | insulator |
| Mo1Ni1P1.ICSD_1133      | metal      | metal     |
| Mo1Ni1P2.ICSD_644023    | metal      | metal     |
| Mo1Ni1P8.ICSD_71037     | insulator  | insulator |
| Mo1Ni3.ICSD_105046      | metal      | metal     |
| Mo1Ni4.ICSD_105047      | metal      | metal     |
| Mo1O11P3Si1.ICSD_202450 | insulator  | insulator |
| Mo1O1Rb2S3.ICSD_423994  | insulator  | insulator |
| Mo1O2Rb2S2.ICSD_423992  | insulator  | insulator |
| Mo1O2Rb2S2.ICSD_423993  | insulator  | insulator |
| Mo1O2.ICSD_23722        | metal      | metal     |
| Mo1O2.ICSD_99714        | metal      | metal     |
| Mo1O3Sr1.ICSD_174205    | metal      | metal     |
| Mo1O3Sr1.ICSD_174206    | metal      | insulator |
| Mo1O3Sr1.ICSD_71994     | metal      | metal     |
| Mo1O3Ti0.33.ICSD_201931 | insulator  | insulator |
| Mo1O3.ICSD_644058       | insulator  | insulator |
| Mo1O3.ICSD_80577        | insulator  | insulator |
| Mo1O4Pb1.ICSD_56111     | insulator  | insulator |
| Mo1O4Rb2.ICSD_24904     | insulator  | insulator |
| Mo1O4Sr1.ICSD_245802    | insulator  | insulator |
| Mo1O4Sr2.ICSD_152123    | metal      | metal     |
| Mo1O4Ti2.ICSD_280056    | insulator  | insulator |
| Mo1O4Ti2.ICSD_421983    | insulator  | insulator |
| Mo1O4Zn1.ICSD_17030     | insulator  | insulator |
| Mo1O4Zn1.ICSD_236417    | insulator  | insulator |
| Mo1O5P1.ICSD_169098     | insulator  | insulator |
| Mo1O5P1.ICSD_36095      | insulator  | insulator |
| Mo1O5Pb2.ICSD_29270     | insulator  | insulator |
| Mo1O5U1.ICSD_82460      | insulator  | insulator |
| Mo1O5V1.ICSD_27315      | insulator  | insulator |
| Mo1O6Os1Pb2.ICSD_188743 | metal      | metal     |
| Mo1O6Os1Sn2.ICSD_188742 | metal      | metal     |
| Mo1O6Rh2.ICSD_200014    | metal      | insulator |

Supplementary Table 510. Five-fold cross validated predictions for the metal/insulator classification (502/598).

| system                  | calculated | predicted |
|-------------------------|------------|-----------|
| Mo1O6Sb2.ICSD_30699     | insulator  | insulator |
| Mo1O6Sr2Zn1.ICSD_262320 | insulator  | insulator |
| Mo1O6Sr2Zn1.ICSD_28602  | insulator  | insulator |
| Mo1O6Te1Zn1.ICSD_163981 | insulator  | insulator |
| Mo1O7P2.ICSD_202810     | insulator  | insulator |
| Mo1O7Se1Zn2.ICSD_261699 | insulator  | insulator |
| Mo1O7Te1Zn2.ICSD_261700 | insulator  | insulator |
| Mo1O7Te2.ICSD_73        | insulator  | insulator |
| Mo1O8V2.ICSD_25378      | insulator  | insulator |
| Mo1O8V2.ICSD_28471      | metal      | insulator |
| Mo1P1Rh1.ICSD_644093    | metal      | metal     |
| Mo1P1Ru1.ICSD_98405     | metal      | metal     |
| Mo1P1Zr1.ICSD_88150     | metal      | metal     |
| Mo1P1.ICSD_186875       | metal      | metal     |
| Mo1P1.ICSD_186876       | metal      | metal     |
| Mo1P1.ICSD_644091       | metal      | metal     |
| Mo1P2.ICSD_43331        | metal      | metal     |
| Mo1P4.ICSD_105057       | metal      | metal     |
| Mo1Pt1.ICSD_644160      | metal      | metal     |
| Mo1Pt2Si3.ICSD_174199   | metal      | metal     |
| Mo1Pt2.ICSD_161107      | metal      | metal     |
| Mo1Pt3Si4.ICSD_174200   | metal      | metal     |
| Mo1Pt3.ICSD_161108      | metal      | metal     |
| Mo1Rb2S4.ICSD_280054    | insulator  | insulator |
| Mo1Rb2Se4.ICSD_644182   | insulator  | insulator |
| Mo1Rh1.ICSD_108608      | metal      | metal     |
| Mo1Rh3.ICSD_105085      | metal      | metal     |
| Mo1S2.ICSD_38401        | insulator  | metal     |
| Mo1S2.ICSD_644249       | metal      | metal     |
| Mo1S2.ICSD_95570        | insulator  | metal     |
| Mo1Sb2Se1.ICSD_280615   | metal      | metal     |
| Mo1Se2.ICSD_16948       | insulator  | insulator |
| Mo1Se2.ICSD_644335      | insulator  | insulator |
| Mo1Si1Zr1.ICSD_644448   | metal      | metal     |
| Mo1Si2.ICSD_644411      | metal      | metal     |
| Mo1Si2.ICSD_71503       | insulator  | metal     |
| Mo1Sn2.ICSD_77114       | metal      | metal     |
| Mo1Te2.ICSD_14349       | metal      | metal     |
| Mo1Te2.ICSD_644476      | insulator  | metal     |
| Mo1Ti1.ICSD_168951      | metal      | metal     |
| Mo1U2.ICSD_105107       | metal      | metal     |
| Mo1Zn6.ICSD_260686      | metal      | metal     |
| Mo1Zn7.ICSD_644500      | metal      | metal     |
| Mo1.ICSD_187346         | metal      | metal     |
| Mo1.ICSD_187347         | metal      | metal     |
| Mo1.ICSD_41513          | metal      | metal     |
| Mo2N1.ICSD_30593        | metal      | metal     |
| Mo2Na1O12P3.ICSD_202860 | metal      | insulator |
| Mo2Na2O7.ICSD_24312     | insulator  | insulator |
| Mo2Nd1O8Ti1.ICSD_161960 | metal      | insulator |

Supplementary Table 511. Five-fold cross validated predictions for the metal/insulator classification (503/598).

| system                   | calculated | predicted |
|--------------------------|------------|-----------|
| Mo2Ni3O11Se1.ICSD_249582 | insulator  | insulator |
| Mo2Ni3O11Te1.ICSD_249583 | insulator  | insulator |
| Mo2Ni6P3.ICSD_20825      | metal      | metal     |
| Mo2O11P2.ICSD_27157      | insulator  | insulator |
| Mo2O12Y5.ICSD_60957      | insulator  | insulator |
| Mo2O16P4Sr1.ICSD_411191  | insulator  | insulator |
| Mo2O7Tb2.ICSD_159772     | metal      | insulator |
| Mo2O7Y2.ICSD_202522      | metal      | metal     |
| Mo2O8Pr1Rb1.ICSD_6290    | insulator  | insulator |
| Mo2O8Pr1Ti1.ICSD_152176  | metal      | insulator |
| Mo2O8Pr1Ti1.ICSD_421051  | insulator  | insulator |
| Mo2O8Sc1Ti1.ICSD_250340  | insulator  | insulator |
| Mo2O8U1.ICSD_28088       | insulator  | insulator |
| Mo2O8Zr1.ICSD_169483     | insulator  | insulator |
| Mo2O8Zr1.ICSD_280435     | insulator  | insulator |
| Mo2O8Zr1.ICSD_59999      | insulator  | insulator |
| Mo2O8Zr1.ICSD_98167      | insulator  | insulator |
| Mo2O9Zn3.ICSD_401828     | insulator  | insulator |
| Mo2S2Sb1.ICSD_97682      | metal      | metal     |
| Mo2S3.ICSD_76371         | metal      | metal     |
| Mo2S4V1.ICSD_201787      | metal      | metal     |
| Mo2S4V1.ICSD_644314      | metal      | metal     |
| Mo2Zr1.ICSD_105115       | metal      | metal     |
| Mo3N1Ni2.ICSD_180405     | metal      | metal     |
| Mo3N1Ni3.ICSD_162274     | metal      | metal     |
| Mo3N1Pd2.ICSD_93502      | metal      | metal     |
| Mo3N1Pt2.ICSD_150314     | metal      | metal     |
| Mo3Na1Se3.ICSD_603625    | metal      | metal     |
| Mo3Na1Te3.ICSD_603641    | metal      | metal     |
| Mo3Na2O12Zr1.ICSD_200913 | insulator  | insulator |
| Mo3Na2O16Te3.ICSD_171758 | insulator  | insulator |
| Mo3O12Sc2.ICSD_20838     | insulator  | insulator |
| Mo3O12Tb2.ICSD_200857    | insulator  | insulator |
| Mo3O14P2Sr1.ICSD_74938   | insulator  | insulator |
| Mo3O16Pr5.ICSD_174567    | metal      | insulator |
| Mo3O8Sc1Zn1.ICSD_40534   | insulator  | insulator |
| Mo3O8Zn2.ICSD_260410     | insulator  | insulator |
| Mo3Os1.ICSD_644078       | metal      | metal     |
| Mo3P1.ICSD_43238         | metal      | metal     |
| Mo3P1.ICSD_644085        | metal      | metal     |
| Mo3Pt1.ICSD_161106       | metal      | metal     |
| Mo3Rb1S3.ICSD_30753      | metal      | metal     |
| Mo3Rb1Se3.ICSD_604516    | metal      | metal     |
| Mo3Rb1Te3.ICSD_603672    | metal      | metal     |
| Mo3Sb7.ICSD_173974       | metal      | metal     |
| Mo3Se3Ti1.ICSD_644381    | metal      | metal     |
| Mo3Se4.ICSD_16316        | metal      | metal     |
| Mo3Si1.ICSD_35755        | metal      | metal     |
| Mo3Si2.ICSD_644412       | metal      | metal     |
| Mo3Si4Tb2.ICSD_600647    | metal      | metal     |

Supplementary Table 512. Five-fold cross validated predictions for the metal/insulator classification (504/598).

| system                    | calculated | predicted |
|---------------------------|------------|-----------|
| Mo3Si4U2_ICSD_658196      | metal      | metal     |
| Mo3Si4Y2_ICSD_76379       | metal      | metal     |
| Mo3Sn1_ICSD_644455        | metal      | metal     |
| Mo3Te3Ti1_ICSD_603670     | metal      | metal     |
| Mo3Ti1_ICSD_168952        | metal      | metal     |
| Mo3Zr1_ICSD_105118        | metal      | metal     |
| Mo4N14Sr10_ICSD_413932    | insulator  | insulator |
| Mo4N1Ni2_ICSD_162277      | metal      | metal     |
| Mo4Na1O6_ICSD_40962       | metal      | metal     |
| Mo4Na5O16Tb1_ICSD_200928  | insulator  | insulator |
| Mo4Ni1Zr9_ICSD_644049     | metal      | metal     |
| Mo4O11_ICSD_15815         | metal      | insulator |
| Mo4O15Tb2_ICSD_280784     | insulator  | insulator |
| Mo4O6Sn1_ICSD_92839       | metal      | metal     |
| Mo5O16U1_ICSD_80162       | insulator  | insulator |
| Mo5Re24_ICSD_109289       | metal      | metal     |
| Mo5Si3_ICSD_644410        | metal      | metal     |
| Mo5Si3_ICSD_76377         | metal      | metal     |
| Mo6Nd1S8_ICSD_603458      | metal      | metal     |
| Mo6Nd1S8_ICSD_644010      | metal      | metal     |
| Mo6Nd1Se8_ICSD_644011     | metal      | metal     |
| Mo6Ni1Te8_ICSD_644045     | metal      | metal     |
| Mo6O17Ti1_ICSD_62699      | metal      | insulator |
| Mo6O24Rb8Zr1_ICSD_165116  | insulator  | insulator |
| Mo6Pb1S8_ICSD_644102      | metal      | metal     |
| Mo6Pb1Se8_ICSD_644122     | metal      | metal     |
| Mo6Pr1S8_ICSD_603457      | metal      | metal     |
| Mo6Pr1Se8_ICSD_644146     | metal      | metal     |
| Mo6S8Sb1_ICSD_604444      | metal      | metal     |
| Mo6S8Sm1_ICSD_600668      | metal      | metal     |
| Mo6S8Sn1_ICSD_644281      | metal      | metal     |
| Mo6S8Sr1_ICSD_644296      | metal      | metal     |
| Mo6S8Tb1_ICSD_603462      | metal      | metal     |
| Mo6S8Ti1_ICSD_644306      | metal      | metal     |
| Mo6S8Y1_ICSD_644317       | metal      | metal     |
| Mo6S8Yb1_ICSD_46014       | metal      | metal     |
| Mo6S8Yb1_ICSD_644324      | metal      | metal     |
| Mo6S8_ICSD_201579         | metal      | metal     |
| Mo6Se8Sm1_ICSD_644358     | metal      | metal     |
| Mo6Se8Sn1_ICSD_644359     | metal      | metal     |
| Mo6Se8Tb1_ICSD_644370     | metal      | metal     |
| Mo6Se8Ti1_ICSD_644379     | metal      | metal     |
| Mo6Se8Y1_ICSD_644389      | metal      | metal     |
| Mo6Se8Yb1_ICSD_644390     | metal      | metal     |
| Mo6Te8_ICSD_59375         | metal      | metal     |
| Mo8P5_ICSD_15058          | metal      | metal     |
| Mo9Rb2S11_ICSD_280262     | metal      | metal     |
| Mo9Se11_ICSD_170348       | metal      | metal     |
| Mo9Se11_ICSD_40789        | metal      | metal     |
| N0.2V0.6Zn0.4_ICSD_644866 | metal      | metal     |

Supplementary Table 513. Five-fold cross validated predictions for the metal/insulator classification (505/598).

| system                   | calculated | predicted |
|--------------------------|------------|-----------|
| N10Si7Sr1_ICSD_154166    | insulator  | insulator |
| N11P6Rb3_ICSD_51396      | insulator  | insulator |
| N11Pr3Si6_ICSD_402178    | insulator  | metal     |
| N12P6S1Zn4_ICSD_76440    | insulator  | insulator |
| N12Rb2Zn1_ICSD_31314     | insulator  | insulator |
| N18W1_ICSD_413860        | insulator  | insulator |
| N1Na1O2_ICSD_174026      | insulator  | insulator |
| N1Na1O3_ICSD_15333       | insulator  | insulator |
| N1Na1Sn1_ICSD_172471     | insulator  | insulator |
| N1Na1_ICSD_184990        | metal      | metal     |
| N1Na3O9P3Ti1_ICSD_172056 | insulator  | insulator |
| N1Na3_ICSD_165989        | metal      | metal     |
| N1Na3_ICSD_165991        | metal      | insulator |
| N1Na3_ICSD_165992        | metal      | insulator |
| N1Na3_ICSD_165994        | metal      | metal     |
| N1Na3_ICSD_421117        | metal      | metal     |
| N1Na5O4W1_ICSD_74934     | insulator  | insulator |
| N1Nb1O1_ICSD_1031        | insulator  | insulator |
| N1Nb1_ICSD_183184        | metal      | metal     |
| N1Nb1_ICSD_185442        | metal      | metal     |
| N1Nb1_ICSD_185549        | metal      | metal     |
| N1Nb1_ICSD_236423        | metal      | metal     |
| N1Nb1_ICSD_644536        | metal      | metal     |
| N1Nb1_ICSD_644540        | metal      | metal     |
| N1Nb1_ICSD_644558        | metal      | metal     |
| N1Nb2_ICSD_167805        | metal      | metal     |
| N1Nb3Zn3_ICSD_42939      | metal      | metal     |
| N1Nb4Ni2_ICSD_644564     | metal      | metal     |
| N1Nd1O4_ICSD_260072      | insulator  | insulator |
| N1Nd1_ICSD_644583        | metal      | metal     |
| N1Nd3Pb1_ICSD_76397      | metal      | metal     |
| N1Nd3Sn1_ICSD_76398      | metal      | metal     |
| N1Nd3Ti1_ICSD_76400      | metal      | metal     |
| N1Ni1_ICSD_161755        | metal      | metal     |
| N1Ni2Ta4_ICSD_644599     | metal      | metal     |
| N1Ni2V4_ICSD_644603      | metal      | metal     |
| N1Ni2W3_ICSD_86170       | metal      | metal     |
| N1Ni2Zr4_ICSD_644605     | metal      | metal     |
| N1Ni3Sn1_ICSD_183371     | metal      | metal     |
| N1Ni3Zn1_ICSD_183370     | metal      | metal     |
| N1Ni3_ICSD_76402         | metal      | metal     |
| N1Ni3_ICSD_76635         | metal      | metal     |
| N1Ni4_ICSD_76403         | metal      | metal     |
| N1O1Se2Tb3_ICSD_420917   | insulator  | insulator |
| N1O1Ta1Zr1_ICSD_76012    | metal      | metal     |
| N1O1Ta1_ICSD_173005      | insulator  | insulator |
| N1O1Ta1_ICSD_20321       | metal      | insulator |
| N1O1Ta1_ICSD_2363        | insulator  | insulator |
| N1O2Si1Y1_ICSD_44163     | insulator  | insulator |
| N1O2Sr1Ta1_ICSD_411137   | insulator  | insulator |

Supplementary Table 514. Five-fold cross validated predictions for the metal/insulator classification (506/598).

| system               | calculated | predicted |
|----------------------|------------|-----------|
| N1O2Ti1.ICSD_50326   | insulator  | insulator |
| N1O3Rb1.ICSD_16338   | insulator  | insulator |
| N1O3Rb1.ICSD_35103   | insulator  | insulator |
| N1O3Ti1.ICSD_1818    | insulator  | insulator |
| N1Os1.ICSD_167513    | metal      | metal     |
| N1Os1.ICSD_167514    | metal      | metal     |
| N1Os1.ICSD_167863    | metal      | metal     |
| N1Os1.ICSD_167879    | metal      | metal     |
| N1Os1.ICSD_187715    | metal      | metal     |
| N1Os1.ICSD_187716    | metal      | metal     |
| N1Os2Zr4.ICSD_644614 | metal      | metal     |
| N1P1V3.ICSD_644620   | metal      | metal     |
| N1P3V5.ICSD_29285    | metal      | metal     |
| N1Pa1.ICSD_644621    | metal      | metal     |
| N1Pd1.ICSD_167857    | metal      | metal     |
| N1Pd1.ICSD_169394    | metal      | metal     |
| N1Pd1.ICSD_169396    | metal      | metal     |
| N1Pd1.ICSD_169397    | metal      | metal     |
| N1Pd1.ICSD_185564    | metal      | metal     |
| N1Pd1.ICSD_185574    | metal      | metal     |
| N1Pm1.ICSD_169216    | metal      | metal     |
| N1Pr1.ICSD_168641    | metal      | metal     |
| N1Pr1.ICSD_168642    | metal      | metal     |
| N1Pr1.ICSD_168643    | metal      | metal     |
| N1Pr1.ICSD_168644    | metal      | metal     |
| N1Pr1.ICSD_181482    | metal      | metal     |
| N1Pr1.ICSD_45161     | metal      | metal     |
| N1Pr1.ICSD_644624    | metal      | metal     |
| N1Pt1.ICSD_163863    | metal      | metal     |
| N1Pt1.ICSD_163864    | metal      | metal     |
| N1Pt1.ICSD_163865    | metal      | metal     |
| N1Pt2Zr4.ICSD_644637 | metal      | metal     |
| N1Pu1.ICSD_644640    | metal      | metal     |
| N1Re1.ICSD_167878    | metal      | metal     |
| N1Re1.ICSD_181297    | metal      | metal     |
| N1Re1.ICSD_181299    | metal      | metal     |
| N1Re1.ICSD_181300    | metal      | metal     |
| N1Re1.ICSD_187711    | metal      | metal     |
| N1Re1.ICSD_187713    | metal      | metal     |
| N1Re1.ICSD_187714    | metal      | metal     |
| N1Re2Zr4.ICSD_644656 | metal      | metal     |
| N1Re2.ICSD_169887    | metal      | metal     |
| N1Re3.ICSD_188352    | metal      | metal     |
| N1Rh1.ICSD_183192    | metal      | metal     |
| N1Rh1.ICSD_185553    | metal      | metal     |
| N1Rh1.ICSD_185563    | metal      | metal     |
| N1Rh1.ICSD_185573    | metal      | metal     |
| N1Rh2Zr4.ICSD_644657 | metal      | metal     |
| N1Ru1.ICSD_167855    | metal      | metal     |
| N1Ru1.ICSD_183190    | metal      | metal     |

Supplementary Table 515. Five-fold cross validated predictions for the metal/insulator classification (507/598).

| system               | calculated | predicted |
|----------------------|------------|-----------|
| N1Ru1.ICSD_185562    | metal      | metal     |
| N1Ru1.ICSD_185572    | metal      | metal     |
| N1Ru2Zr4.ICSD_644658 | metal      | metal     |
| N1S1.ICSD_41967      | metal      | insulator |
| N1S3Tb3.ICSD_416217  | insulator  | insulator |
| N1Sb1Sr3.ICSD_152052 | insulator  | insulator |
| N1Sc1.ICSD_157501    | insulator  | metal     |
| N1Sc1.ICSD_180830    | metal      | insulator |
| N1Sn3Zr5.ICSD_656291 | metal      | metal     |
| N1Sr1.ICSD_411555    | metal      | insulator |
| N1Sr2.ICSD_411612    | metal      | metal     |
| N1Ta1.ICSD_105123    | metal      | metal     |
| N1Ta1.ICSD_167876    | metal      | metal     |
| N1Ta1.ICSD_167901    | metal      | metal     |
| N1Ta1.ICSD_180958    | metal      | metal     |
| N1Ta1.ICSD_183426    | metal      | metal     |
| N1Ta1.ICSD_186417    | metal      | metal     |
| N1Ta1.ICSD_644712    | metal      | metal     |
| N1Ta1.ICSD_76457     | metal      | metal     |
| N1Ta2.ICSD_167808    | metal      | metal     |
| N1Tb1.ICSD_644738    | metal      | metal     |
| N1Tc1.ICSD_182012    | metal      | metal     |
| N1Tc1.ICSD_182015    | metal      | metal     |
| N1Tc1.ICSD_185571    | metal      | metal     |
| N1Tc1.ICSD_187707    | metal      | metal     |
| N1Tc1.ICSD_187708    | metal      | metal     |
| N1Tc1.ICSD_187709    | metal      | metal     |
| N1Tc1.ICSD_187710    | metal      | metal     |
| N1Tc2.ICSD_182011    | metal      | metal     |
| N1Tc3.ICSD_182010    | metal      | metal     |
| N1Th1.ICSD_61757     | metal      | metal     |
| N1Ti1.ICSD_183416    | metal      | metal     |
| N1Ti1.ICSD_644776    | metal      | metal     |
| N1Ti2.ICSD_23403     | metal      | metal     |
| N1Ti2.ICSD_33715     | metal      | metal     |
| N1Ti3Ti1.ICSD_42931  | metal      | metal     |
| N1Ti3Zn3.ICSD_644790 | metal      | metal     |
| N1Ti1.ICSD_184575    | metal      | metal     |
| N1Ti1.ICSD_186556    | metal      | metal     |
| N1Ti1.ICSD_186557    | metal      | metal     |
| N1Tm1.ICSD_57149     | metal      | metal     |
| N1Tm1.ICSD_644802    | metal      | metal     |
| N1U1.ICSD_60377      | metal      | metal     |
| N1U1.ICSD_644816     | metal      | metal     |
| N1V1.ICSD_169821     | metal      | metal     |
| N1V1.ICSD_183421     | metal      | metal     |
| N1V1.ICSD_188217     | metal      | metal     |
| N1V1.ICSD_236425     | metal      | metal     |
| N1V2.ICSD_167802     | metal      | metal     |
| N1W1.ICSD_167861     | metal      | metal     |

Supplementary Table 516. Five-fold cross validated predictions for the metal/insulator classification (508/598).

| system                  | calculated | predicted |
|-------------------------|------------|-----------|
| N1W1.ICSD.167877        | metal      | metal     |
| N1W1.ICSD.644869        | metal      | metal     |
| N1W2.ICSD.30354         | metal      | metal     |
| N1Y1.ICSD.161078        | insulator  | metal     |
| N1Y1.ICSD.161079        | metal      | insulator |
| N1Y1.ICSD.183180        | insulator  | metal     |
| N1Y1.ICSD.185493        | metal      | metal     |
| N1Y1.ICSD.185557        | insulator  | metal     |
| N1Y1.ICSD.185567        | metal      | metal     |
| N1Y1.ICSD.37413         | insulator  | metal     |
| N1Yb1.ICSD.169225       | metal      | metal     |
| N1Zn3Zr3.ICSD.42935     | metal      | metal     |
| N1Zr1.ICSD.161885       | metal      | metal     |
| N1Zr1.ICSD.181144       | metal      | metal     |
| N1Zr1.ICSD.183182       | metal      | metal     |
| N1Zr1.ICSD.185558       | metal      | metal     |
| N1Zr1.ICSD.185568       | metal      | metal     |
| N1Zr1.ICSD.44506        | metal      | metal     |
| N1.ICSD.187643          | insulator  | insulator |
| N1.ICSD.95247           | metal      | insulator |
| N21P3.ICSD.416415       | insulator  | insulator |
| N24O2P12Zn8.ICSD.417324 | insulator  | insulator |
| N2Na1Nb1.ICSD.72557     | insulator  | insulator |
| N2Na1P1.ICSD.411818     | insulator  | insulator |
| N2Na1Ta1.ICSD.76382     | insulator  | insulator |
| N2Na2O2.ICSD.66978      | insulator  | insulator |
| N2Na4O2W1.ICSD.73101    | insulator  | insulator |
| N2Ni1O6.ICSD.28327      | insulator  | insulator |
| N2Ni1Sr2.ICSD.91273     | insulator  | metal     |
| N2O12Se3.ICSD.78900     | insulator  | insulator |
| N2O14S3.ICSD.16615      | insulator  | insulator |
| N2O1Si2.ICSD.34025      | insulator  | insulator |
| N2O1.ICSD.22397         | insulator  | insulator |
| N2O2S2Se1.ICSD.69978    | insulator  | insulator |
| N2O2S3.ICSD.41538       | insulator  | insulator |
| N2O2S4.ICSD.410547      | insulator  | insulator |
| N2O2.ICSD.27871         | metal      | insulator |
| N2O3.ICSD.66362         | insulator  | insulator |
| N2O4.ICSD.164631        | insulator  | insulator |
| N2O4.ICSD.201140        | insulator  | insulator |
| N2O4.ICSD.28331         | insulator  | insulator |
| N2O4.ICSD.29047         | insulator  | insulator |
| N2O4.ICSD.31175         | insulator  | insulator |
| N2O5S3.ICSD.14151       | insulator  | insulator |
| N2O5.ICSD.30639         | insulator  | insulator |
| N2O6Pb1.ICSD.56086      | insulator  | insulator |
| N2O6Sr1.ICSD.35494      | insulator  | insulator |
| N2O8Pb2Se1.ICSD.60893   | insulator  | insulator |
| N2Os1.ICSD.160621       | metal      | metal     |
| N2Os1.ICSD.185513       | metal      | metal     |

Supplementary Table 517. Five-fold cross validated predictions for the metal/insulator classification (509/598).

| system               | calculated | predicted |
|----------------------|------------|-----------|
| N2Os1.ICSD.260545    | metal      | metal     |
| N2Os1.ICSD.260549    | metal      | metal     |
| N2Os1.ICSD.290439    | metal      | metal     |
| N2Os1.ICSD.290441    | metal      | metal     |
| N2P1U2.ICSD.23216    | metal      | metal     |
| N2P1U2.ICSD.41945    | metal      | metal     |
| N2Pb1S2.ICSD.49539   | insulator  | insulator |
| N2Pt1.ICSD.166462    | insulator  | insulator |
| N2Pt1.ICSD.166463    | insulator  | metal     |
| N2Pt1.ICSD.290445    | metal      | metal     |
| N2Pt1.ICSD.290446    | metal      | metal     |
| N2Re1.ICSD.187441    | metal      | metal     |
| N2Re1.ICSD.187442    | metal      | metal     |
| N2Re1.ICSD.187444    | metal      | metal     |
| N2Re1.ICSD.187446    | metal      | metal     |
| N2Re1.ICSD.187447    | metal      | metal     |
| N2Re1.ICSD.187448    | metal      | metal     |
| N2Re1.ICSD.187449    | metal      | metal     |
| N2Re1.ICSD.187450    | metal      | metal     |
| N2Re1.ICSD.187451    | metal      | metal     |
| N2Re1.ICSD.187452    | metal      | metal     |
| N2Re1.ICSD.290436    | metal      | metal     |
| N2Re1.ICSD.290438    | metal      | metal     |
| N2Rh1.ICSD.160624    | metal      | metal     |
| N2Rh1.ICSD.240760    | metal      | metal     |
| N2Ru1.ICSD.240754    | metal      | metal     |
| N2Ru1.ICSD.260550    | metal      | metal     |
| N2S1Th2.ICSD.23213   | insulator  | insulator |
| N2S1U2.ICSD.23217    | metal      | metal     |
| N2S1Zr2.ICSD.96970   | insulator  | insulator |
| N2S1Zr2.ICSD.96971   | insulator  | insulator |
| N2S2.ICSD.37353      | insulator  | metal     |
| N2S4.ICSD.201218     | insulator  | insulator |
| N2Sb1Th2.ICSD.16062  | metal      | metal     |
| N2Sb1U2.ICSD.644665  | metal      | metal     |
| N2Se1Th2.ICSD.23211  | insulator  | insulator |
| N2Se1U2.ICSD.41943   | metal      | metal     |
| N2Se1Zr2.ICSD.424266 | insulator  | insulator |
| N2Se3Tb4.ICSD.412928 | insulator  | insulator |
| N2Si1Sr1.ICSD.170270 | insulator  | insulator |
| N2Si1Zn1.ICSD.656276 | insulator  | insulator |
| N2Sr1Ti1.ICSD.85770  | insulator  | insulator |
| N2Sr1Zr1.ICSD.82537  | insulator  | insulator |
| N2Sr1.ICSD.423722    | metal      | metal     |
| N2Sr2Zn1.ICSD.80376  | insulator  | insulator |
| N2Ta1.ICSD.290431    | metal      | metal     |
| N2Ta1.ICSD.290432    | metal      | metal     |
| N2Te1Th2.ICSD.16063  | insulator  | insulator |
| N2Te1U2.ICSD.16060   | insulator  | metal     |
| N2U1V1.ICSD.644843   | metal      | metal     |

Supplementary Table 518. Five-fold cross validated predictions for the metal/insulator classification (510/598).

| system                  | calculated | predicted |
|-------------------------|------------|-----------|
| N2U1.ICSD.105129        | insulator  | metal     |
| N2W1.ICSD.290433        | insulator  | metal     |
| N2W1.ICSD.290434        | insulator  | insulator |
| N2W1.ICSD.290435        | metal      | metal     |
| N2W1.ICSD.30364         | metal      | metal     |
| N2Zn3.ICSD.84918        | insulator  | insulator |
| N2Zr1.ICSD.262746       | metal      | insulator |
| N2.ICSD.15819           | insulator  | insulator |
| N2.ICSD.24891           | insulator  | insulator |
| N2.ICSD.24892           | insulator  | insulator |
| N2.ICSD.28179           | insulator  | insulator |
| N2.ICSD.40936           | insulator  | insulator |
| N2.ICSD.644518          | insulator  | insulator |
| N3Na1Si2.ICSD.72466     | insulator  | insulator |
| N3Na1.ICSD.155167       | insulator  | metal     |
| N3Na1.ICSD.24006        | insulator  | insulator |
| N3Na1.ICSD.29373        | metal      | insulator |
| N3Na1.ICSD.29383        | insulator  | insulator |
| N3Na1.ICSD.644523       | insulator  | insulator |
| N3Na3W1.ICSD.75364      | insulator  | insulator |
| N3Nb1Sr2.ICSD.51028     | insulator  | insulator |
| N3Nb4.ICSD.76389        | metal      | metal     |
| N3O11Rb1U1.ICSD.23806   | insulator  | insulator |
| N3O1Ta2.ICSD.182352     | metal      | metal     |
| N3P1Zn2.ICSD.422150     | insulator  | insulator |
| N3Rb1.ICSD.16963        | insulator  | insulator |
| N3Rb1.ICSD.25007        | insulator  | insulator |
| N3Rh1.ICSD.162107       | metal      | metal     |
| N3Rh1.ICSD.162108       | metal      | metal     |
| N3Sr2V1.ICSD.80176      | insulator  | insulator |
| N3Ta1Th1.ICSD.247344    | metal      | insulator |
| N3Ta1Th1.ICSD.247345    | insulator  | metal     |
| N3Ta1Ti2.ICSD.186418    | metal      | metal     |
| N3Ta1Zr2.ICSD.186419    | metal      | metal     |
| N3Ta2Ti1.ICSD.186421    | metal      | metal     |
| N3Ta2Zr1.ICSD.186422    | metal      | metal     |
| N3Tb2.ICSD.644736       | metal      | metal     |
| N3Th2.ICSD.76637        | metal      | insulator |
| N3Ti1.ICSD.34268        | insulator  | insulator |
| N3U2.ICSD.644812        | metal      | metal     |
| N3U2.ICSD.644840        | metal      | metal     |
| N3V2.ICSD.182700        | metal      | metal     |
| N3W2.ICSD.186207        | metal      | metal     |
| N4O12Pd1Rb2.ICSD.158878 | insulator  | insulator |
| N4O14Rb2U1.ICSD.28095   | insulator  | insulator |
| N4O2S4.ICSD.37165       | insulator  | insulator |
| N4O3S4.ICSD.25508       | insulator  | insulator |
| N4O3Si3Y2.ICSD.89931    | insulator  | insulator |
| N4O8Zr7.ICSD.245752     | insulator  | insulator |
| N4Se4.ICSD.14325        | insulator  | insulator |

Supplementary Table 519. Five-fold cross validated predictions for the metal/insulator classification (511/598).

| system                  | calculated | predicted |
|-------------------------|------------|-----------|
| N4Se4.ICSD.74838        | insulator  | insulator |
| N4Si3.ICSD.156337       | insulator  | insulator |
| N4Si3.ICSD.164618       | insulator  | insulator |
| N4Si3.ICSD.16752        | insulator  | insulator |
| N4Si3.ICSD.67241        | insulator  | insulator |
| N4Si3.ICSD.74744        | insulator  | insulator |
| N4Si3.ICSD.74750        | insulator  | insulator |
| N4Si3.ICSD.97567        | insulator  | insulator |
| N4Si3.ICSD.98636        | insulator  | insulator |
| N4Sn3.ICSD.89525        | metal      | insulator |
| N4Ta2.ICSD.182351       | metal      | metal     |
| N4Th3.ICSD.14336        | insulator  | metal     |
| N4W3.ICSD.186209        | metal      | metal     |
| N4Zr3.ICSD.78945        | insulator  | insulator |
| N4Zr3.ICSD.97998        | insulator  | metal     |
| N5Na1Ta3.ICSD.84911     | metal      | insulator |
| N5Nb4.ICSD.644542       | metal      | metal     |
| N5P3.ICSD.391073        | insulator  | insulator |
| N5P3.ICSD.411857        | insulator  | insulator |
| N5Ta3.ICSD.16253        | insulator  | metal     |
| N5Ta4.ICSD.29328        | metal      | metal     |
| N6Na3O12Rh1.ICSD.39571  | insulator  | insulator |
| N6Nb5.ICSD.26252        | metal      | metal     |
| N6Ni1O12Pb2.ICSD.24510  | metal      | insulator |
| N6Ni1O12Sr2.ICSD.24509  | metal      | insulator |
| N6O1P4.ICSD.79420       | insulator  | insulator |
| N6S5.ICSD.200444        | insulator  | insulator |
| N6Sr1.ICSD.30337        | insulator  | insulator |
| N6Ta5.ICSD.76461        | metal      | metal     |
| N7Na1P4.ICSD.410629     | insulator  | insulator |
| N7Si4Sr1Y1.ICSD.150459  | insulator  | insulator |
| N7Si4Sr1Yb1.ICSD.160650 | insulator  | insulator |
| N7Si4Sr1Yb1.ICSD.405625 | metal      | insulator |
| N8O6P6Sr3.ICSD.163603   | insulator  | insulator |
| N8Si5Sr2.ICSD.401500    | insulator  | insulator |
| N8Si6Sr1.ICSD.391265    | insulator  | insulator |
| N9Sb1.ICSD.413359       | insulator  | insulator |
| Na10P6Sn2.ICSD.300189   | insulator  | insulator |
| Na10Sn12Sr1.ICSD.240007 | insulator  | insulator |
| Na10Sn12Yb1.ICSD.172210 | insulator  | insulator |
| Na11O16U5.ICSD.15137    | metal      | insulator |
| Na15Pb4.ICSD.105160     | metal      | metal     |
| Na15Sn4.ICSD.105167     | metal      | metal     |
| Na1Nb1O2.ICSD.73111     | insulator  | insulator |
| Na1Nb1O3.ICSD.23239     | insulator  | insulator |
| Na1Nb1O3.ICSD.247314    | insulator  | insulator |
| Na1Nb1O3.ICSD.247318    | insulator  | insulator |
| Na1Nb1O3.ICSD.280098    | insulator  | insulator |
| Na1Nb1O3.ICSD.280100    | insulator  | insulator |
| Na1Nb1O3.ICSD.28566     | insulator  | insulator |

Supplementary Table 520. Five-fold cross validated predictions for the metal/insulator classification (512/598).

| system                  | calculated | predicted |
|-------------------------|------------|-----------|
| Na1Nb1O3.ICSD_28570     | insulator  | insulator |
| Na1Nb1O3.ICSD_76432     | insulator  | insulator |
| Na1Nb1O3.ICSD_9645      | insulator  | insulator |
| Na1Nb1O6Sr3.ICSD_418494 | insulator  | insulator |
| Na1Nb1S2.ICSD_26285     | insulator  | insulator |
| Na1Nb1Se2.ICSD_26287    | insulator  | insulator |
| Na1Nb3O8.ICSD_63203     | insulator  | insulator |
| Na1Nd1O2.ICSD_31317     | insulator  | insulator |
| Na1Nd1O4Ti1.ICSD_82004  | insulator  | insulator |
| Na1Nd1O8S2.ICSD_90774   | insulator  | insulator |
| Na1Nd1S2.ICSD_644913    | insulator  | insulator |
| Na1Nd1Se2.ICSD_644914   | insulator  | insulator |
| Na1Ni1O2.ICSD_153372    | insulator  | insulator |
| Na1O11V6.ICSD_419551    | insulator  | metal     |
| Na1O12P3Sn4.ICSD_409786 | insulator  | insulator |
| Na1O12P3Ti2.ICSD_203042 | insulator  | insulator |
| Na1O12P3V3.ICSD_202911  | metal      | insulator |
| Na1O12P3Zr2.ICSD_467    | insulator  | insulator |
| Na1O13Ti8.ICSD_69110    | metal      | insulator |
| Na1O2Pr1.ICSD_61682     | metal      | insulator |
| Na1O2Rh1.ICSD_66280     | insulator  | insulator |
| Na1O2Ru1.ICSD_170347    | insulator  | insulator |
| Na1O2Sc1.ICSD_25729     | insulator  | insulator |
| Na1O2Tb1.ICSD_61683     | insulator  | insulator |
| Na1O2Ti1.ICSD_43439     | insulator  | insulator |
| Na1O2Ti1.ICSD_644919    | insulator  | insulator |
| Na1O2V1.ICSD_420136     | insulator  | insulator |
| Na1O2V1.ICSD_420137     | insulator  | insulator |
| Na1O2V1.ICSD_420138     | insulator  | insulator |
| Na1O2Y1.ICSD_2740       | insulator  | insulator |
| Na1O2.ICSD_26583        | metal      | insulator |
| Na1O2.ICSD_87178        | metal      | insulator |
| Na1O3Rb1Ti1.ICSD_78753  | insulator  | insulator |
| Na1O3Sb1.ICSD_25540     | insulator  | insulator |
| Na1O3Sb1.ICSD_78416     | insulator  | insulator |
| Na1O3Sb1.ICSD_98978     | insulator  | insulator |
| Na1O3Ta1.ICSD_16687     | insulator  | insulator |
| Na1O3Ta1.ICSD_23322     | insulator  | insulator |
| Na1O3Ta1.ICSD_28606     | insulator  | insulator |
| Na1O3Ta1.ICSD_28609     | insulator  | insulator |
| Na1O3Ta1.ICSD_28610     | insulator  | insulator |
| Na1O3Ta1.ICSD_980       | insulator  | insulator |
| Na1O3V1.ICSD_29450      | insulator  | insulator |
| Na1O3W1.ICSD_28866      | metal      | insulator |
| Na1O3.ICSD_180566       | insulator  | metal     |
| Na1O4P1Zn1.ICSD_87557   | insulator  | insulator |
| Na1O4Pd3.ICSD_245608    | metal      | metal     |
| Na1O4Pr1Ti1.ICSD_422048 | insulator  | insulator |
| Na1O4Pt3.ICSD_185930    | metal      | insulator |
| Na1O4Re1.ICSD_78831     | insulator  | insulator |

Supplementary Table 521. Five-fold cross validated predictions for the metal/insulator classification (513/598).

| system                  | calculated | predicted |
|-------------------------|------------|-----------|
| Na1O4Rh2.ICSD_170598    | metal      | insulator |
| Na1O4Ru2.ICSD_172608    | metal      | metal     |
| Na1O4Si1Y1.ICSD_20161   | insulator  | insulator |
| Na1O4Si1Y1.ICSD_30384   | insulator  | insulator |
| Na1O4Ti1Y1.ICSD_81538   | insulator  | insulator |
| Na1O4V2.ICSD_159905     | metal      | insulator |
| Na1O5P1Ti1.ICSD_67538   | insulator  | insulator |
| Na1O5P1V1.ICSD_33944    | insulator  | insulator |
| Na1O5V2.ICSD_409210     | insulator  | insulator |
| Na1O6Os2.ICSD_246504    | metal      | metal     |
| Na1O6Ru1Sr3.ICSD_401345 | insulator  | insulator |
| Na1O6S2Ti3.ICSD_1626    | insulator  | insulator |
| Na1O6Sb1Sr3.ICSD_51259  | insulator  | insulator |
| Na1O6Sc1Si2.ICSD_74553  | insulator  | insulator |
| Na1O6Si2Ti1.ICSD_281615 | insulator  | insulator |
| Na1O6Si2Ti1.ICSD_39194  | insulator  | insulator |
| Na1O6Si2V1.ICSD_78342   | insulator  | insulator |
| Na1O6Si2Y1.ICSD_171255  | insulator  | insulator |
| Na1O6Sr3Ta1.ICSD_418491 | insulator  | insulator |
| Na1O7P2Y1.ICSD_83657    | insulator  | insulator |
| Na1O8P1W2.ICSD_93368    | metal      | insulator |
| Na1O8Pr1Se2.ICSD_63408  | insulator  | insulator |
| Na1O8Rb3Ru2.ICSD_416038 | insulator  | insulator |
| Na1O8S2V1.ICSD_71760    | insulator  | insulator |
| Na1O8Sb5.ICSD_28494     | insulator  | insulator |
| Na1O8Ta3.ICSD_63204     | insulator  | insulator |
| Na1P1Pd1S4.ICSD_97456   | insulator  | insulator |
| Na1P1Sn1.ICSD_409010    | insulator  | insulator |
| Na1P1Sr1.ICSD_416887    | insulator  | insulator |
| Na1P1Zn1.ICSD_61083     | insulator  | insulator |
| Na1P1.ICSD_14009        | insulator  | insulator |
| Na1P2S6Sb1.ICSD_155269  | insulator  | insulator |
| Na1P2S6Sb1.ICSD_155270  | insulator  | insulator |
| Na1P5.ICSD_99177        | insulator  | insulator |
| Na1Pb3.ICSD_644932      | metal      | metal     |
| Na1Pr1Se2.ICSD_644941   | insulator  | insulator |
| Na1Pr1Te2.ICSD_413184   | metal      | insulator |
| Na1Pt2.ICSD_644945      | metal      | metal     |
| Na1S1.ICSD_182222       | metal      | insulator |
| Na1S2Sb1.ICSD_200597    | insulator  | insulator |
| Na1S2Sb1.ICSD_49016     | insulator  | insulator |
| Na1S2Sb1.ICSD_71091     | insulator  | insulator |
| Na1S2Sc1.ICSD_644971    | insulator  | insulator |
| Na1S2Sn1.ICSD_23450     | metal      | insulator |
| Na1S2Tb1.ICSD_644985    | insulator  | insulator |
| Na1S2Ti1.ICSD_26305     | metal      | insulator |
| Na1S2V1.ICSD_644993     | metal      | insulator |
| Na1S2V1.ICSD_644994     | metal      | insulator |
| Na1S2V1.ICSD_76541      | insulator  | metal     |
| Na1S2Y1.ICSD_644997     | insulator  | insulator |

Supplementary Table 522. Five-fold cross validated predictions for the metal/insulator classification (514/598).

| system                    | calculated | predicted |
|---------------------------|------------|-----------|
| Na1S2Yb1.ICSD_645003      | metal      | insulator |
| Na1S7Si1Y3.ICSD_412445    | insulator  | insulator |
| Na1Sb1Zn1.ICSD_645023     | metal      | insulator |
| Na1Sb1.ICSD_26473         | insulator  | insulator |
| Na1Se2Tb1.ICSD_645031     | insulator  | insulator |
| Na1Se2V1.ICSD_76548       | insulator  | metal     |
| Na1Se2V1.ICSD_77597       | metal      | insulator |
| Na1Se2Y1.ICSD_645037      | insulator  | insulator |
| Na1Se2Yb1.ICSD_409678     | metal      | insulator |
| Na1Sn2.ICSD_170467        | metal      | metal     |
| Na1Sn5.ICSD_408045        | metal      | metal     |
| Na1Ti1.ICSD_108619        | metal      | metal     |
| Na1Ti1.ICSD_262065        | metal      | metal     |
| Na1Ti1.ICSD_262066        | metal      | metal     |
| Na1Zn13.ICSD_105173       | metal      | metal     |
| Na1.ICSD_159431           | metal      | metal     |
| Na1.ICSD_182587           | metal      | metal     |
| Na1.ICSD_189460           | metal      | metal     |
| Na1.ICSD_44758            | metal      | metal     |
| Na1.ICSD_644901           | metal      | metal     |
| Na1.ICSD_644902           | metal      | metal     |
| Na2Ni1O14P4Zr1.ICSD_65703 | insulator  | insulator |
| Na2Ni1O2Rb1.ICSD_73209    | metal      | insulator |
| Na2Ni1O2.ICSD_14159       | insulator  | insulator |
| Na2O11Si4Ti1.ICSD_16899   | insulator  | insulator |
| Na2O11Si4Zr1.ICSD_6267    | insulator  | insulator |
| Na2O12P4Sr1.ICSD_37171    | insulator  | insulator |
| Na2O13Ti6.ICSD_182965     | insulator  | insulator |
| Na2O1S2Ti1.ICSD_67886     | insulator  | insulator |
| Na2O1Sb2Ti2.ICSD_91209    | metal      | insulator |
| Na2O1.ICSD_644917         | insulator  | insulator |
| Na2O2Pb1.ICSD_21058       | insulator  | insulator |
| Na2O2Pt1.ICSD_25018       | insulator  | insulator |
| Na2O2Zn1.ICSD_404761      | insulator  | insulator |
| Na2O2.ICSD_109276         | insulator  | insulator |
| Na2O3Pr1.ICSD_64664       | insulator  | insulator |
| Na2O3Pt1.ICSD_25019       | insulator  | insulator |
| Na2O3Pt1.ICSD_25020       | metal      | insulator |
| Na2O3Ru1.ICSD_97584       | insulator  | insulator |
| Na2O3S1.ICSD_4432         | insulator  | insulator |
| Na2O3S2.ICSD_60026        | insulator  | insulator |
| Na2O3Se1.ICSD_89638       | insulator  | insulator |
| Na2O3Si1.ICSD_15388       | insulator  | insulator |
| Na2O3Tb1.ICSD_64665       | metal      | insulator |
| Na2O3Ti1.ICSD_183666      | insulator  | insulator |
| Na2O3Zn2.ICSD_25617       | insulator  | insulator |
| Na2O3Zn2.ICSD_404913      | insulator  | insulator |
| Na2O4Os1.ICSD_261702      | insulator  | insulator |
| Na2O4Pd3.ICSD_6157        | insulator  | insulator |
| Na2O4S1.ICSD_27955        | metal      | insulator |

Supplementary Table 523. Five-fold cross validated predictions for the metal/insulator classification (515/598).

| system                 | calculated | predicted |
|------------------------|------------|-----------|
| Na2O4S1.ICSD_66555     | insulator  | insulator |
| Na2O4S1.ICSD_81506     | insulator  | insulator |
| Na2O4S2.ICSD_16646     | insulator  | insulator |
| Na2O4Se1.ICSD_150706   | insulator  | insulator |
| Na2O4Si1Zn1.ICSD_18314 | insulator  | insulator |
| Na2O4Si1Zn1.ICSD_83312 | insulator  | insulator |
| Na2O4Te1.ICSD_1108     | insulator  | insulator |
| Na2O4U1.ICSD_20142     | insulator  | insulator |
| Na2O4U1.ICSD_20503     | insulator  | insulator |
| Na2O4U1.ICSD_20579     | insulator  | insulator |
| Na2O4U1.ICSD_79423     | insulator  | insulator |
| Na2O4U1.ICSD_79424     | insulator  | insulator |
| Na2O4W1.ICSD_28474     | insulator  | insulator |
| Na2O5Si1Ti1.ICSD_1533  | insulator  | insulator |
| Na2O5Si1Ti1.ICSD_82153 | insulator  | insulator |
| Na2O6Si2Zn1.ICSD_16160 | insulator  | insulator |
| Na2O6Si2Zn1.ICSD_20837 | insulator  | insulator |
| Na2O6Si2Zn1.ICSD_83427 | insulator  | insulator |
| Na2O6V2.ICSD_20556     | insulator  | insulator |
| Na2O7P2Pb1.ICSD_92179  | insulator  | insulator |
| Na2O7P2Pd1.ICSD_72751  | insulator  | insulator |
| Na2O7S2.ICSD_413049    | insulator  | insulator |
| Na2O7Sb4.ICSD_914      | insulator  | insulator |
| Na2O7Si2Zr1.ICSD_24866 | insulator  | insulator |
| Na2O7Si3.ICSD_81134    | insulator  | insulator |
| Na2O7Te2.ICSD_391382   | insulator  | insulator |
| Na2O7Ti3.ICSD_15463    | insulator  | insulator |
| Na2O7V2Zn1.ICSD_153966 | insulator  | insulator |
| Na2O7W2.ICSD_1883      | insulator  | insulator |
| Na2O8P2V1.ICSD_50376   | insulator  | insulator |
| Na2O8S2.ICSD_171374    | insulator  | insulator |
| Na2O8Si3Zn1.ICSD_924   | insulator  | insulator |
| Na2O9Te3Zn2.ICSD_24434 | insulator  | insulator |
| Na2Pd1S2.ICSD_76533    | insulator  | insulator |
| Na2Pd1Se2.ICSD_644936  | insulator  | insulator |
| Na2Pt1S2.ICSD_87219    | insulator  | insulator |
| Na2Pt1Se2.ICSD_40429   | insulator  | insulator |
| Na2Pt4Se6.ICSD_78788   | insulator  | insulator |
| Na2Rb1Si17.ICSD_91240  | metal      | metal     |
| Na2S1.ICSD_644959      | insulator  | insulator |
| Na2S1.ICSD_92771       | insulator  | insulator |
| Na2S1.ICSD_92772       | insulator  | insulator |
| Na2S2Zn1.ICSD_33235    | insulator  | insulator |
| Na2S2.ICSD_43407       | insulator  | insulator |
| Na2S2.ICSD_73180       | insulator  | insulator |
| Na2S3U1.ICSD_88097     | metal      | insulator |
| Na2S4.ICSD_644957      | insulator  | insulator |
| Na2S5Si2.ICSD_166532   | insulator  | insulator |
| Na2S5.ICSD_38349       | insulator  | insulator |
| Na2Se1.ICSD_645027     | insulator  | insulator |

Supplementary Table 524. Five-fold cross validated predictions for the metal/insulator classification (516/598).

| system                  | calculated | predicted |
|-------------------------|------------|-----------|
| Na2Se2.ICSD_43408       | insulator  | insulator |
| Na2Se3Sn1.ICSD_300237   | insulator  | insulator |
| Na2Se3Te1.ICSD_63011    | insulator  | insulator |
| Na2Se3Zr1.ICSD_412158   | insulator  | insulator |
| Na2Se4.ICSD_402584      | insulator  | insulator |
| Na2Sn4Sr1.ICSD_261117   | metal      | metal     |
| Na2Te1.ICSD_76553       | insulator  | insulator |
| Na2Ti1.ICSD_105171      | metal      | metal     |
| Na2Ti2.ICSD_261793      | metal      | metal     |
| Na3Nb1O4.ICSD_6116      | insulator  | insulator |
| Na3O12P3Sc2.ICSD_20740  | insulator  | insulator |
| Na3O1P1S3.ICSD_98651    | insulator  | insulator |
| Na3O1S3V1.ICSD_281593   | insulator  | insulator |
| Na3O2Ti1.ICSD_202028    | insulator  | insulator |
| Na3O3P1S1.ICSD_412368   | insulator  | insulator |
| Na3O3Sb1.ICSD_23346     | insulator  | insulator |
| Na3O4Sb1.ICSD_10320     | insulator  | insulator |
| Na3O5Os1.ICSD_416999    | insulator  | insulator |
| Na3O5Re1.ICSD_36637     | insulator  | insulator |
| Na3P1S4.ICSD_72860      | insulator  | insulator |
| Na3P1.ICSD_26884        | insulator  | insulator |
| Na3S3Sb1.ICSD_644966    | insulator  | insulator |
| Na3S4Sb1.ICSD_44707     | insulator  | insulator |
| Na3Sb1Se3.ICSD_425125   | insulator  | insulator |
| Na3Sb1Se4.ICSD_65141    | insulator  | insulator |
| Na3Sb1Te3.ICSD_75513    | insulator  | insulator |
| Na3Sb1.ICSD_26882       | insulator  | metal     |
| Na4O12P3Sc2.ICSD_202833 | insulator  | insulator |
| Na4O12Si3Zr2.ICSD_38056 | insulator  | insulator |
| Na4O12Ti5.ICSD_170677   | insulator  | insulator |
| Na4O3Sn1.ICSD_49624     | insulator  | insulator |
| Na4O4Pb1.ICSD_74859     | insulator  | insulator |
| Na4O4Si1.ICSD_15500     | insulator  | insulator |
| Na4O4Sn1.ICSD_202818    | insulator  | insulator |
| Na4O4Ti1.ICSD_69621     | insulator  | insulator |
| Na4O5Te1.ICSD_202325    | insulator  | insulator |
| Na4O5U1.ICSD_68360      | insulator  | insulator |
| Na4O5W1.ICSD_85063      | insulator  | insulator |
| Na4O7P2.ICSD_10370      | insulator  | insulator |
| Na4O9Si3Sr1.ICSD_33943  | insulator  | insulator |
| Na4P2Se6.ICSD_415240    | insulator  | insulator |
| Na4S4Sn1.ICSD_42035     | insulator  | insulator |
| Na4Se4Si1.ICSD_409726   | insulator  | insulator |
| Na4Se4Sn1.ICSD_72384    | insulator  | insulator |
| Na4Si23.ICSD_248168     | metal      | insulator |
| Na4Si4.ICSD_409953      | insulator  | metal     |
| Na4Sn1Te4.ICSD_37184    | insulator  | insulator |
| Na5Nb1O5.ICSD_24819     | insulator  | insulator |
| Na5Ni1O2S1.ICSD_412972  | metal      | insulator |
| Na5O10P3.ICSD_25837     | insulator  | insulator |

Supplementary Table 525. Five-fold cross validated predictions for the metal/insulator classification (517/598).

| system                  | calculated | predicted |
|-------------------------|------------|-----------|
| Na5O5Ta1.ICSD_72297     | insulator  | insulator |
| Na5O6Os1.ICSD_49746     | insulator  | insulator |
| Na5O6Re1.ICSD_38382     | insulator  | insulator |
| Na6O4Pb1.ICSD_21059     | insulator  | insulator |
| Na6O4Zn1.ICSD_6161      | insulator  | insulator |
| Na6O5Pb1.ICSD_15102     | insulator  | insulator |
| Na6O5Pb1.ICSD_21036     | insulator  | insulator |
| Na6O9S2.ICSD_411442     | insulator  | insulator |
| Na6P4Pb3S16.ICSD_280724 | insulator  | insulator |
| Na6P4W1.ICSD_71647      | insulator  | insulator |
| Na6S4Zn1.ICSD_33236     | insulator  | insulator |
| Na6S7Sn2.ICSD_25389     | insulator  | insulator |
| Na6Si2Te6.ICSD_15579    | insulator  | insulator |
| Na6Sn2Zn1.ICSD_260159   | metal      | metal     |
| Na8O18Si6Sn1.ICSD_20768 | insulator  | insulator |
| Na8Sb4Sn1.ICSD_76496    | metal      | insulator |
| Na9Sn4.ICSD_105166      | metal      | metal     |
| Nb11O30Rb4.ICSD_200367  | insulator  | insulator |
| Nb1Nd1O4.ICSD_246956    | insulator  | insulator |
| Nb1Nd3O7.ICSD_109060    | insulator  | insulator |
| Nb1Ni1P1.ICSD_49728     | metal      | metal     |
| Nb1Ni1P2.ICSD_645092    | metal      | metal     |
| Nb1Ni1Si1.ICSD_645107   | metal      | metal     |
| Nb1Ni1Te5.ICSD_73316    | metal      | metal     |
| Nb1Ni2Sn1.ICSD_105182   | metal      | metal     |
| Nb1Ni2.ICSD_188262      | metal      | metal     |
| Nb1Ni2.ICSD_188271      | metal      | metal     |
| Nb1Ni3.ICSD_188229      | metal      | metal     |
| Nb1Ni3.ICSD_188241      | metal      | metal     |
| Nb1Ni3.ICSD_645068      | metal      | metal     |
| Nb1O1.ICSD_40318        | metal      | metal     |
| Nb1O1.ICSD_61634        | metal      | metal     |
| Nb1O1.ICSD_95729        | metal      | metal     |
| Nb1O2.ICSD_35181        | insulator  | insulator |
| Nb1O2.ICSD_75198        | metal      | metal     |
| Nb1O3Rb1.ICSD_16380     | insulator  | insulator |
| Nb1O3Sr1.ICSD_42004     | metal      | metal     |
| Nb1O3Sr1.ICSD_88723     | metal      | insulator |
| Nb1O4Sb1.ICSD_40011     | insulator  | insulator |
| Nb1O4Y1.ICSD_20335      | insulator  | insulator |
| Nb1O5P1.ICSD_36626      | insulator  | insulator |
| Nb1O5P1.ICSD_51144      | insulator  | insulator |
| Nb1O5P1.ICSD_51150      | insulator  | insulator |
| Nb1O5P1.ICSD_93769      | insulator  | insulator |
| Nb1O7Pr3.ICSD_78007     | insulator  | insulator |
| Nb1O8Rb3.ICSD_407327    | insulator  | insulator |
| Nb1O9Rb1S2.ICSD_28085   | insulator  | insulator |
| Nb1Os1Te4.ICSD_656450   | metal      | metal     |
| Nb1P1Rh1.ICSD_645173    | metal      | metal     |
| Nb1P1Ru1.ICSD_645175    | metal      | metal     |

Supplementary Table 526. Five-fold cross validated predictions for the metal/insulator classification (518/598).

| system                  | calculated | predicted |
|-------------------------|------------|-----------|
| Nb1P1S1.ICSD.16075      | metal      | metal     |
| Nb1P1Se1.ICSD.16076     | metal      | metal     |
| Nb1P1V1.ICSD.645178     | metal      | metal     |
| Nb1P1Zr1.ICSD.75008     | metal      | metal     |
| Nb1P1.ICSD.645167       | metal      | metal     |
| Nb1P1.ICSD.76027        | metal      | metal     |
| Nb1P2S8.ICSD.38376      | insulator  | insulator |
| Nb1P2.ICSD.645169       | metal      | metal     |
| Nb1Pb0.33S2.ICSD.74694  | metal      | metal     |
| Nb1Pb1S2.ICSD.74698     | metal      | metal     |
| Nb1Pd1Si1.ICSD.416177   | metal      | metal     |
| Nb1Pd1Te5.ICSD.68103    | metal      | metal     |
| Nb1Pd2.ICSD.645190      | metal      | metal     |
| Nb1Pd3.ICSD.105192      | metal      | metal     |
| Nb1Pt1Si1.ICSD.90433    | metal      | metal     |
| Nb1Pt1.ICSD.645211      | metal      | metal     |
| Nb1Pt2.ICSD.645233      | metal      | metal     |
| Nb1Pt3.ICSD.645210      | metal      | metal     |
| Nb1Pt3.ICSD.645212      | metal      | metal     |
| Nb1Re1Si1.ICSD.645257   | metal      | metal     |
| Nb1Rh1Sb1.ICSD.107122   | metal      | metal     |
| Nb1Rh1Si1.ICSD.90434    | metal      | metal     |
| Nb1Rh1Sn1.ICSD.105220   | metal      | metal     |
| Nb1Rh1.ICSD.645263      | metal      | metal     |
| Nb1Rh1.ICSD.645264      | metal      | metal     |
| Nb1Rh1.ICSD.645280      | metal      | metal     |
| Nb1Rh3.ICSD.645261      | metal      | metal     |
| Nb1Rh3.ICSD.645275      | metal      | metal     |
| Nb1Ru1Sb1.ICSD.83929    | insulator  | metal     |
| Nb1Ru1Si1.ICSD.600057   | metal      | metal     |
| Nb1Ru1.ICSD.105221      | metal      | metal     |
| Nb1Ru1.ICSD.105222      | metal      | metal     |
| Nb1Ru3.ICSD.105224      | metal      | metal     |
| Nb1S1.ICSD.44992        | metal      | metal     |
| Nb1S1.ICSD.76564        | metal      | metal     |
| Nb1S2Sn0.333.ICSD.83038 | metal      | metal     |
| Nb1S2Sn0.33.ICSD.74695  | metal      | metal     |
| Nb1S2Sn1.ICSD.100389    | metal      | metal     |
| Nb1S2.ICSD.24755        | metal      | metal     |
| Nb1S2.ICSD.43697        | metal      | metal     |
| Nb1S2.ICSD.50648        | metal      | metal     |
| Nb1S2.ICSD.645321       | metal      | metal     |
| Nb1S2.ICSD.66358        | metal      | metal     |
| Nb1S2.ICSD.68968        | metal      | metal     |
| Nb1S2.ICSD.72725        | metal      | metal     |
| Nb1S2.ICSD.79514        | metal      | metal     |
| Nb1S2.ICSD.85578        | metal      | metal     |
| Nb1S3.ICSD.2380         | insulator  | metal     |
| Nb1S3.ICSD.645316       | metal      | metal     |
| Nb1S4Ti3.ICSD.600246    | insulator  | insulator |

Supplementary Table 527. Five-fold cross validated predictions for the metal/insulator classification (519/598).

| system                  | calculated | predicted |
|-------------------------|------------|-----------|
| Nb1Sb2.ICSD.18144       | metal      | metal     |
| Nb1Se2.ICSD.18129       | metal      | metal     |
| Nb1Se2.ICSD.18132       | metal      | metal     |
| Nb1Se2.ICSD.645379      | metal      | metal     |
| Nb1Se2.ICSD.645391      | metal      | metal     |
| Nb1Se2.ICSD.73093       | metal      | metal     |
| Nb1Se2.ICSD.76576       | metal      | metal     |
| Nb1Se3.ICSD.30002       | metal      | metal     |
| Nb1Se4Ti3.ICSD.600249   | insulator  | insulator |
| Nb1Se4.ICSD.645375      | metal      | metal     |
| Nb1Si2.ICSD.645422      | metal      | metal     |
| Nb1Si2.ICSD.645450      | metal      | metal     |
| Nb1Sn2.ICSD.105229      | metal      | metal     |
| Nb1Sn2.ICSD.645495      | metal      | metal     |
| Nb1Te2.ICSD.14389       | metal      | metal     |
| Nb1Te2.ICSD.645529      | metal      | metal     |
| Nb1Te4.ICSD.60603       | metal      | metal     |
| Nb1Te4.ICSD.645526      | metal      | metal     |
| Nb1Zn2.ICSD.105257      | metal      | metal     |
| Nb1Zn3.ICSD.105258      | metal      | metal     |
| Nb1.ICSD.0              | metal      | metal     |
| Nb1.ICSD.41512          | metal      | metal     |
| Nb1.ICSD.645059         | metal      | metal     |
| Nb21S8.ICSD.76568       | metal      | metal     |
| Nb2Ni1O6.ICSD.15853     | insulator  | insulator |
| Nb2Ni1S4.ICSD.645093    | metal      | metal     |
| Nb2Ni1.ICSD.188268      | metal      | metal     |
| Nb2Ni2Te4.ICSD.84209    | metal      | metal     |
| Nb2O10Ti1U1.ICSD.23404  | insulator  | insulator |
| Nb2O11Te3.ICSD.10034    | insulator  | insulator |
| Nb2O13Se4.ICSD.85668    | insulator  | insulator |
| Nb2O3.ICSD.263119       | metal      | metal     |
| Nb2O5.ICSD.188460       | insulator  | insulator |
| Nb2O5.ICSD.25765        | insulator  | insulator |
| Nb2O5.ICSD.51176        | insulator  | insulator |
| Nb2O6Pb1.ICSD.166552    | insulator  | insulator |
| Nb2O6Sn1.ICSD.202827    | insulator  | insulator |
| Nb2O6Sr1.ICSD.20348     | insulator  | insulator |
| Nb2O6Zn1.ICSD.36290     | insulator  | insulator |
| Nb2O7Sn2.ICSD.163817    | insulator  | insulator |
| Nb2O8Zn3.ICSD.66147     | insulator  | insulator |
| Nb2O9Sr4.ICSD.79217     | insulator  | insulator |
| Nb2O9Zn4.ICSD.98563     | insulator  | insulator |
| Nb2P1S10Ti1.ICSD.417943 | insulator  | insulator |
| Nb2P1S10.ICSD.33233     | insulator  | insulator |
| Nb2P2Rb2S11.ICSD.412277 | insulator  | insulator |
| Nb2P5.ICSD.23281        | metal      | metal     |
| Nb2Pd3Se8.ICSD.49523    | insulator  | insulator |
| Nb2S11Ti4.ICSD.411602   | insulator  | insulator |
| Nb2Se11Ti4.ICSD.171148  | insulator  | insulator |

Supplementary Table 528. Five-fold cross validated predictions for the metal/insulator classification (520/598).

| system                   | calculated | predicted |
|--------------------------|------------|-----------|
| Nb2Se1.ICSD_26183        | metal      | metal     |
| Nb2Se3.ICSD_42981        | metal      | metal     |
| Nb2Se4Ti1.ICSD_645395    | metal      | metal     |
| Nb2Se4V1.ICSD_645402     | metal      | metal     |
| Nb2Se9.ICSD_8179         | insulator  | metal     |
| Nb2Si5V4.ICSD_76587      | metal      | metal     |
| Nb2Te3.ICSD_280016       | metal      | metal     |
| Nb3.33Pt1.67.ICSD_645232 | metal      | metal     |
| Nb3Ni1.ICSD_188226       | metal      | metal     |
| Nb3Ni1.ICSD_188238       | metal      | metal     |
| Nb3Ni1.ICSD_188250       | metal      | metal     |
| Nb3Ni2Si1.ICSD_20443     | metal      | metal     |
| Nb3O10Rb1Sr2.ICSD_93674  | insulator  | insulator |
| Nb3O10U1.ICSD_26997      | insulator  | insulator |
| Nb3Os1.ICSD_603783       | metal      | metal     |
| Nb3P1.ICSD_43206         | metal      | metal     |
| Nb3Pb1.ICSD_105189       | metal      | metal     |
| Nb3Pt1.ICSD_645218       | metal      | metal     |
| Nb3Rh1Se6.ICSD_645284    | metal      | metal     |
| Nb3Rh1.ICSD_645269       | metal      | metal     |
| Nb3S4.ICSD_645317        | metal      | metal     |
| Nb3S6V1.ICSD_645340      | metal      | metal     |
| Nb3Sb1.ICSD_645347       | metal      | metal     |
| Nb3Sb2Te5.ICSD_417101    | insulator  | metal     |
| Nb3Sc2Si4.ICSD_600920    | metal      | metal     |
| Nb3Se4.ICSD_43281        | metal      | metal     |
| Nb3Si1Te6.ICSD_71681     | metal      | metal     |
| Nb3Si1.ICSD_108629       | metal      | metal     |
| Nb3Si1.ICSD_1997         | metal      | metal     |
| Nb3Si1.ICSD_645413       | metal      | metal     |
| Nb3Si1.ICSD_645416       | metal      | metal     |
| Nb3Si2.ICSD_645431       | metal      | metal     |
| Nb3Sn1.ICSD_105231       | metal      | metal     |
| Nb3Te1.ICSD_105244       | metal      | metal     |
| Nb3Te4.ICSD_16606        | metal      | metal     |
| Nb3Ti1.ICSD_105251       | metal      | metal     |
| Nb4Ni1P1.ICSD_645089     | metal      | metal     |
| Nb4Ni1S8.ICSD_645094     | metal      | metal     |
| Nb4Ni1Se8.ICSD_645099    | metal      | metal     |
| Nb4Ni1Si1.ICSD_76559     | metal      | metal     |
| Nb4O5.ICSD_39595         | metal      | metal     |
| Nb4O6Sr1.ICSD_79355      | metal      | metal     |
| Nb4S8Ti1.ICSD_645332     | metal      | metal     |
| Nb4S8V1.ICSD_645339      | metal      | metal     |
| Nb4Si5V2.ICSD_645460     | metal      | metal     |
| Nb5Ni1.ICSD_105179       | metal      | metal     |
| Nb5Ni4P4.ICSD_645087     | metal      | metal     |
| Nb5O17Sr5.ICSD_79699     | metal      | insulator |
| Nb5O1Pt3.ICSD_36277      | metal      | metal     |
| Nb5O9Sr2.ICSD_71859      | metal      | metal     |

Supplementary Table 529. Five-fold cross validated predictions for the metal/insulator classification (521/598).

| system                  | calculated | predicted |
|-------------------------|------------|-----------|
| Nb5P1Si3.ICSD_165098    | metal      | metal     |
| Nb5P4Pd4.ICSD_280273    | metal      | metal     |
| Nb5Sb4.ICSD_154596      | metal      | metal     |
| Nb5Sb4.ICSD_76573       | metal      | metal     |
| Nb5Se4.ICSD_76582       | metal      | metal     |
| Nb5Se8Sn1.ICSD_657512   | metal      | metal     |
| Nb5Se8Sr1.ICSD_657513   | metal      | metal     |
| Nb5Si1Sn2.ICSD_16499    | metal      | metal     |
| Nb5Si3.ICSD_189717      | metal      | metal     |
| Nb5Si3.ICSD_645428      | metal      | metal     |
| Nb5Te4.ICSD_105245      | metal      | metal     |
| Nb6Ni16Si7.ICSD_109220  | metal      | metal     |
| Nb6Ni6O1.ICSD_74998     | metal      | metal     |
| Nb6Ni7.ICSD_188280      | metal      | metal     |
| Nb6O16Sr1.ICSD_60783    | insulator  | insulator |
| Nb6Sn5.ICSD_645476      | metal      | metal     |
| Nb6Sn6Tb1.ICSD_261123   | metal      | metal     |
| Nb6Zn7.ICSD_645562      | metal      | metal     |
| Nb7Ni6.ICSD_645077      | metal      | metal     |
| Nb7P4.ICSD_41238        | metal      | metal     |
| Nb8O14Sr1.ICSD_202673   | insulator  | insulator |
| Nb9O25P1.ICSD_18163     | insulator  | insulator |
| Nd1Ni1O2.ICSD_98585     | metal      | metal     |
| Nd1Ni1P1.ICSD_645618    | metal      | metal     |
| Nd1Ni1Sb2.ICSD_645624   | metal      | metal     |
| Nd1Ni1Si2.ICSD_658589   | metal      | metal     |
| Nd1Ni1Sn1.ICSD_105161   | metal      | metal     |
| Nd1Ni1Sn2.ICSD_645652   | metal      | metal     |
| Nd1Ni1.ICSD_645586      | metal      | metal     |
| Nd1Ni2P2.ICSD_659935    | metal      | metal     |
| Nd1Ni2Sb2.ICSD_645622   | metal      | metal     |
| Nd1Ni2Sb2.ICSD_645623   | metal      | metal     |
| Nd1Ni2Si2.ICSD_105271   | metal      | metal     |
| Nd1Ni2Sn2.ICSD_160053   | metal      | metal     |
| Nd1Ni2Sn2.ICSD_645651   | metal      | metal     |
| Nd1Ni2.ICSD_105265      | metal      | metal     |
| Nd1Ni4Sn2.ICSD_645647   | metal      | metal     |
| Nd1Ni5.ICSD_105267      | metal      | metal     |
| Nd1Ni5.ICSD_645598      | metal      | metal     |
| Nd1Ni5.ICSD_645614      | metal      | metal     |
| Nd1O1P1Zn1.ICSD_85776   | insulator  | insulator |
| Nd1O1Sb1Zn1.ICSD_182896 | metal      | metal     |
| Nd1O1Sb1Zn1.ICSD_419354 | metal      | metal     |
| Nd1O2Rb1.ICSD_27332     | insulator  | insulator |
| Nd1O3Rh1.ICSD_172349    | insulator  | insulator |
| Nd1O3V1.ICSD_28928      | metal      | metal     |
| Nd1O4P1.ICSD_184552     | insulator  | insulator |
| Nd1O4P1.ICSD_184558     | insulator  | insulator |
| Nd1O4P1.ICSD_31565      | insulator  | insulator |
| Nd1O4P1.ICSD_62311      | insulator  | insulator |

Supplementary Table 530. Five-fold cross validated predictions for the metal/insulator classification (522/598).

| system                 | calculated | predicted |
|------------------------|------------|-----------|
| Nd1O4Sb1_ICSD_245048   | insulator  | insulator |
| Nd1O4Ta1_ICSD_415430   | insulator  | insulator |
| Nd1O4Ta1_ICSD_79498    | insulator  | insulator |
| Nd1O4Ta1_ICSD_90451    | insulator  | insulator |
| Nd1O4V1_ICSD_78077     | metal      | insulator |
| Nd1O8Rb1W2_ICSD_155378 | insulator  | insulator |
| Nd1O9P3_ICSD_2034      | insulator  | insulator |
| Nd1O9Ta3_ICSD_66284    | insulator  | insulator |
| Nd1Os1Si3_ICSD_645674  | metal      | metal     |
| Nd1Os2Si2_ICSD_645676  | metal      | metal     |
| Nd1Os2_ICSD_150520     | metal      | metal     |
| Nd1Os4P12_ICSD_645670  | metal      | metal     |
| Nd1Os4Sb12_ICSD_645672 | metal      | metal     |
| Nd1P12Ru4_ICSD_645686  | metal      | metal     |
| Nd1P1Pd1_ICSD_710050   | metal      | metal     |
| Nd1P1_ICSD_645680      | metal      | metal     |
| Nd1P2Rh2_ICSD_645685   | metal      | metal     |
| Nd1P2Ru2_ICSD_602103   | metal      | metal     |
| Nd1P5_ICSD_358         | metal      | metal     |
| Nd1Pb3_ICSD_645697     | metal      | metal     |
| Nd1Pd1Sb1_ICSD_645716  | metal      | metal     |
| Nd1Pd1Sb2_ICSD_658220  | metal      | metal     |
| Nd1Pd1Sn1_ICSD_419191  | metal      | metal     |
| Nd1Pd1Sn1_ICSD_54460   | metal      | metal     |
| Nd1Pd1Ti1_ICSD_105275  | metal      | metal     |
| Nd1Pd1Zn1_ICSD_183337  | metal      | metal     |
| Nd1Pd1_ICSD_645704     | metal      | metal     |
| Nd1Pd2Si1_ICSD_645717  | metal      | metal     |
| Nd1Pd2Si2_ICSD_601628  | metal      | metal     |
| Nd1Pd3S4_ICSD_84666    | metal      | metal     |
| Nd1Pd3_ICSD_656117     | metal      | metal     |
| Nd1Pt1Sb1_ICSD_76600   | metal      | metal     |
| Nd1Pt1Si1_ICSD_645745  | metal      | metal     |
| Nd1Pt1Sn1_ICSD_415952  | metal      | metal     |
| Nd1Pt1Sn1_ICSD_415953  | metal      | metal     |
| Nd1Pt1_ICSD_105278     | metal      | metal     |
| Nd1Pt1_ICSD_645730     | metal      | metal     |
| Nd1Pt2Si2_ICSD_601629  | metal      | metal     |
| Nd1Pt2Si2_ICSD_645746  | metal      | metal     |
| Nd1Pt2Si2_ICSD_645749  | metal      | metal     |
| Nd1Pt2_ICSD_105279     | metal      | metal     |
| Nd1Pt3_ICSD_105280     | metal      | metal     |
| Nd1Pt5_ICSD_658356     | metal      | metal     |
| Nd1Rb1S2_ICSD_81397    | insulator  | insulator |
| Nd1Rb1Se2_ICSD_281070  | insulator  | insulator |
| Nd1Rb1Te2_ICSD_413330  | insulator  | metal     |
| Nd1Rb1Te2_ICSD_98659   | metal      | insulator |
| Nd1Rb1Te4_ICSD_412793  | insulator  | insulator |
| Nd1Re2_ICSD_645751     | metal      | metal     |
| Nd1Rh1Si2_ICSD_603359  | metal      | metal     |

Supplementary Table 531. Five-fold cross validated predictions for the metal/insulator classification (523/598).

| system                 | calculated | predicted |
|------------------------|------------|-----------|
| Nd1Rh1Si3_ICSD_645778  | metal      | metal     |
| Nd1Rh1Sn1_ICSD_154856  | metal      | metal     |
| Nd1Rh1Sn1_ICSD_657267  | metal      | metal     |
| Nd1Rh1_ICSD_645758     | metal      | metal     |
| Nd1Rh2Si2_ICSD_105284  | metal      | metal     |
| Nd1Rh2Sn4_ICSD_164992  | metal      | metal     |
| Nd1Rh2_ICSD_105283     | metal      | metal     |
| Nd1Rh3Si2_ICSD_645774  | metal      | metal     |
| Nd1Rh3Si2_ICSD_76602   | metal      | metal     |
| Nd1Rh3_ICSD_645759     | metal      | metal     |
| Nd1Ru1Si1_ICSD_41251   | metal      | metal     |
| Nd1Ru1Si2_ICSD_66316   | metal      | metal     |
| Nd1Ru1Si3_ICSD_645815  | metal      | metal     |
| Nd1Ru1Sn3_ICSD_601202  | metal      | metal     |
| Nd1Ru1Sn3_ICSD_657114  | metal      | metal     |
| Nd1Ru2Si2_ICSD_645811  | metal      | metal     |
| Nd1Ru2Si2_ICSD_90298   | metal      | metal     |
| Nd1Ru2_ICSD_645792     | metal      | metal     |
| Nd1Ru2_ICSD_645798     | metal      | metal     |
| Nd1Ru2_ICSD_645805     | metal      | metal     |
| Nd1Ru4Sb12_ICSD_645809 | metal      | metal     |
| Nd1S1_ICSD_645849      | metal      | metal     |
| Nd1S2Ti1_ICSD_57403    | insulator  | insulator |
| Nd1S2_ICSD_645846      | metal      | metal     |
| Nd1S2_ICSD_656242      | metal      | metal     |
| Nd1Sb1Te1_ICSD_601643  | metal      | metal     |
| Nd1Sb1_ICSD_76738      | metal      | metal     |
| Nd1Sb1_ICSD_92168      | metal      | metal     |
| Nd1Sb2_ICSD_645892     | metal      | metal     |
| Nd1Sc1Si1_ICSD_645909  | metal      | metal     |
| Nd1Se1.9_ICSD_65143    | insulator  | insulator |
| Nd1Se1_ICSD_645915     | metal      | metal     |
| Nd1Se2Ti1_ICSD_106988  | insulator  | metal     |
| Nd1Se2_ICSD_645919     | metal      | metal     |
| Nd1Si1_ICSD_42944      | metal      | metal     |
| Nd1Si2_ICSD_645972     | metal      | metal     |
| Nd1Si2_ICSD_645987     | metal      | metal     |
| Nd1Si2_ICSD_76665      | metal      | metal     |
| Nd1Sn1Zn1_ICSD_426467  | metal      | metal     |
| Nd1Sn2_ICSD_54292      | metal      | metal     |
| Nd1Sn3_ICSD_657378     | metal      | metal     |
| Nd1Te1_ICSD_646023     | metal      | metal     |
| Nd1Te2Ti1_ICSD_646038  | insulator  | metal     |
| Nd1Te2_ICSD_646009     | metal      | metal     |
| Nd1Ti1Zn1_ICSD_646055  | metal      | metal     |
| Nd1Ti1_ICSD_105292     | metal      | metal     |
| Nd1Ti3_ICSD_105293     | metal      | metal     |
| Nd1Zn11_ICSD_105303    | metal      | metal     |
| Nd1Zn1_ICSD_105299     | metal      | metal     |
| Nd1Zn2_ICSD_105301     | metal      | metal     |

Supplementary Table 532. Five-fold cross validated predictions for the metal/insulator classification (524/598).

| system                  | calculated | predicted |
|-------------------------|------------|-----------|
| Nd1Zn2.ICSD_646064      | metal      | metal     |
| Nd1Zn5.ICSD_105302      | metal      | metal     |
| Nd1.ICSD_43571          | metal      | metal     |
| Nd1.ICSD_43577          | metal      | metal     |
| Nd1.ICSD_645578         | metal      | metal     |
| Nd2Ni12P7.ICSD_602470   | metal      | metal     |
| Nd2Ni1O4.ICSD_71137     | metal      | insulator |
| Nd2Ni7P4.ICSD_39360     | metal      | metal     |
| Nd2O13Te2W2.ICSD_249540 | insulator  | insulator |
| Nd2O2S1.ICSD_32515      | insulator  | insulator |
| Nd2O2Se1.ICSD_25806     | insulator  | insulator |
| Nd2O2Te1.ICSD_22250     | insulator  | insulator |
| Nd2O3.ICSD_160208       | insulator  | insulator |
| Nd2O3.ICSD_160223       | insulator  | insulator |
| Nd2O3.ICSD_184534       | insulator  | insulator |
| Nd2O3.ICSD_26867        | insulator  | insulator |
| Nd2O4.ICSD_62228        | insulator  | insulator |
| Nd2O7Pt2.ICSD_402456    | insulator  | insulator |
| Nd2O7Ru2.ICSD_161572    | insulator  | metal     |
| Nd2O7Sn2.ICSD_82958     | metal      | insulator |
| Nd2O7Ti2.ICSD_164026    | insulator  | insulator |
| Nd2O7Zr2.ICSD_160164    | metal      | insulator |
| Nd2O7Zr2.ICSD_62793     | insulator  | metal     |
| Nd2Re3Si5.ICSD_10085    | metal      | metal     |
| Nd2Rh1Si3.ICSD_57432    | metal      | metal     |
| Nd2S2Te1.ICSD_94478     | insulator  | metal     |
| Nd2S3.ICSD_645834       | insulator  | insulator |
| Nd2S5Sn1.ICSD_645866    | metal      | metal     |
| Nd2Sb1.ICSD_409859      | metal      | metal     |
| Nd2Sc1Si2.ICSD_85942    | metal      | metal     |
| Nd2Te3.ICSD_280889      | metal      | metal     |
| Nd2Ti1.ICSD_105294      | metal      | metal     |
| Nd2Zn17.ICSD_601787     | metal      | metal     |
| Nd2Zn17.ICSD_646068     | metal      | metal     |
| Nd2Zn17.ICSD_646072     | metal      | metal     |
| Nd3Ni6Si2.ICSD_645644   | metal      | metal     |
| Nd3O12Sb5.ICSD_67021    | insulator  | insulator |
| Nd3O7Re1.ICSD_96411     | metal      | insulator |
| Nd3O7Sb1.ICSD_188502    | insulator  | insulator |
| Nd3O7Ta1.ICSD_55659     | insulator  | insulator |
| Nd3Pt23Si11.ICSD_187876 | metal      | metal     |
| Nd3Pt4.ICSD_645736      | metal      | metal     |
| Nd3Pt7Sb4.ICSD_95852    | metal      | metal     |
| Nd3Rh4Sn13.ICSD_645789  | metal      | metal     |
| Nd3Ru4Sn13.ICSD_423136  | metal      | metal     |
| Nd3S4.ICSD_645833       | metal      | metal     |
| Nd3Se4.ICSD_645910      | metal      | metal     |
| Nd3Te4.ICSD_646006      | metal      | metal     |
| Nd3Ti1.ICSD_646054      | metal      | metal     |
| Nd3Ti5.ICSD_646052      | metal      | metal     |

Supplementary Table 533. Five-fold cross validated predictions for the metal/insulator classification (525/598).

| system                  | calculated | predicted |
|-------------------------|------------|-----------|
| Nd4O19Os6.ICSD_200870   | metal      | metal     |
| Nd4O4Se3.ICSD_419129    | insulator  | insulator |
| Nd4Sb3.ICSD_645890      | metal      | metal     |
| Nd4Sb3.ICSD_645901      | metal      | metal     |
| Ne1.ICSD_43427          | insulator  | insulator |
| Ne1.ICSD_65884          | insulator  | insulator |
| Ne1.ICSD_65885          | insulator  | insulator |
| Ne1.ICSD_65886          | insulator  | insulator |
| Ne1.ICSD_65887          | insulator  | insulator |
| Ne1.ICSD_65888          | insulator  | insulator |
| Ne1.ICSD_65889          | insulator  | insulator |
| Ne1.ICSD_65890          | insulator  | insulator |
| Ne1.ICSD_65891          | insulator  | insulator |
| Ne1.ICSD_65892          | insulator  | insulator |
| Ne1.ICSD_65893          | insulator  | insulator |
| Ne1.ICSD_65894          | insulator  | insulator |
| Ne1.ICSD_65895          | insulator  | insulator |
| Ne1.ICSD_65896          | insulator  | insulator |
| Ne1.ICSD_65897          | insulator  | insulator |
| Ne1.ICSD_65898          | insulator  | insulator |
| Ne1.ICSD_65899          | insulator  | insulator |
| Ne1.ICSD_65900          | insulator  | insulator |
| Ne1.ICSD_65901          | insulator  | insulator |
| Ne1.ICSD_65902          | insulator  | insulator |
| Ne1.ICSD_65903          | insulator  | insulator |
| Ne1.ICSD_65904          | insulator  | insulator |
| Ni0.33S2Ti1.ICSD_26313  | metal      | metal     |
| Ni10Si2Tb1.ICSD_97035   | metal      | metal     |
| Ni10Zr7.ICSD_240191     | metal      | metal     |
| Ni11Sc3Si4.ICSD_20659   | metal      | metal     |
| Ni11Zr9.ICSD_105487     | metal      | metal     |
| Ni12P5.ICSD_108640      | metal      | metal     |
| Ni12P7Sc2.ICSD_409431   | metal      | metal     |
| Ni12P7Tb2.ICSD_602494   | metal      | metal     |
| Ni12P7U2.ICSD_602731    | metal      | metal     |
| Ni12P7Y2.ICSD_189494    | metal      | metal     |
| Ni12P7Yb2.ICSD_602514   | metal      | metal     |
| Ni12P7Zr2.ICSD_646190   | metal      | metal     |
| Ni16Sc6Si7.ICSD_109117  | metal      | metal     |
| Ni16Si7Ta6.ICSD_109219  | metal      | metal     |
| Ni16Si7Ti6.ICSD_109221  | metal      | metal     |
| Ni16Si7V6.ICSD_109218   | metal      | metal     |
| Ni16Si7Zr6.ICSD_109222  | metal      | metal     |
| Ni1O10Te2V2.ICSD_260257 | insulator  | insulator |
| Ni1O12P4Zn1.ICSD_37137  | insulator  | insulator |
| Ni1O12Re2Sr4.ICSD_16419 | insulator  | insulator |
| Ni1O1Zr3.ICSD_71964     | metal      | metal     |
| Ni1O1.ICSD_76670        | insulator  | insulator |
| Ni1O1.ICSD_92128        | insulator  | insulator |
| Ni1O2Rb2.ICSD_66277     | insulator  | insulator |

Supplementary Table 534. Five-fold cross validated predictions for the metal/insulator classification (526/598).

| system                    | calculated | predicted |
|---------------------------|------------|-----------|
| Ni1O2Rb3_ICSD_424579      | insulator  | insulator |
| Ni1O2Rb3_ICSD_424580      | insulator  | insulator |
| Ni1O2Sr1_ICSD_36123       | insulator  | metal     |
| Ni1O2_ICSD_78698          | insulator  | insulator |
| Ni1O2_ICSD_88720          | insulator  | insulator |
| Ni1O3Pb1_ICSD_187685      | metal      | insulator |
| Ni1O3Pr1_ICSD_69186       | metal      | metal     |
| Ni1O3Se1_ICSD_497         | insulator  | insulator |
| Ni1O3Ti1_ICSD_15988       | insulator  | insulator |
| Ni1O3Yb1_ICSD_151949      | metal      | metal     |
| Ni1O4Pr2_ICSD_81577       | insulator  | metal     |
| Ni1O4Rh2_ICSD_23487       | metal      | metal     |
| Ni1O4S1_ICSD_16741        | insulator  | insulator |
| Ni1O4S1_ICSD_33737        | insulator  | insulator |
| Ni1O4Sb2_ICSD_86489       | insulator  | insulator |
| Ni1O4Se1_ICSD_25700       | insulator  | insulator |
| Ni1O4W1_ICSD_15852        | insulator  | insulator |
| Ni1O6Os1Sr2_ICSD_152443   | metal      | metal     |
| Ni1O6Pb1Sr3_ICSD_152588   | insulator  | insulator |
| Ni1O6Pt1Sr3_ICSD_75335    | insulator  | insulator |
| Ni1O6Re1Sr2_ICSD_173487   | insulator  | metal     |
| Ni1O6Rh1Sr3_ICSD_51799    | insulator  | insulator |
| Ni1O6Ru1Sr2_ICSD_181753   | metal      | insulator |
| Ni1O6Sb2_ICSD_80802       | insulator  | insulator |
| Ni1O6Sc1Sr3_ICSD_81659    | metal      | insulator |
| Ni1O6Sr2Te1_ICSD_16225    | insulator  | insulator |
| Ni1O6Sr2Te1_ICSD_91792    | insulator  | insulator |
| Ni1O6Sr2W1_ICSD_109165    | insulator  | insulator |
| Ni1O6Sr2W1_ICSD_9294      | insulator  | insulator |
| Ni1O6Ta2_ICSD_61198       | insulator  | insulator |
| Ni1O6U2_ICSD_166251       | insulator  | insulator |
| Ni1O6U2_ICSD_28126        | insulator  | insulator |
| Ni1O6V2_ICSD_33881        | insulator  | insulator |
| Ni1O8P2Sr1Zn1_ICSD_157945 | insulator  | insulator |
| Ni1O8Re2_ICSD_51016       | insulator  | insulator |
| Ni1O9Se3Sr2_ICSD_419618   | insulator  | insulator |
| Ni1P1Pd1_ICSD_646124      | metal      | metal     |
| Ni1P1Pr1_ICSD_646128      | metal      | metal     |
| Ni1P1Rh1_ICSD_646131      | metal      | metal     |
| Ni1P1Rh1_ICSD_646132      | metal      | metal     |
| Ni1P1S1_ICSD_93898        | metal      | metal     |
| Ni1P1S3_ICSD_646133       | metal      | insulator |
| Ni1P1Sc1_ICSD_50990       | metal      | metal     |
| Ni1P1Se3_ICSD_646145      | metal      | insulator |
| Ni1P1Ta1_ICSD_646155      | metal      | metal     |
| Ni1P1Ta4_ICSD_646156      | metal      | metal     |
| Ni1P1Ti1_ICSD_646165      | metal      | metal     |
| Ni1P1V1_ICSD_646176       | metal      | metal     |
| Ni1P1W1_ICSD_646181       | metal      | metal     |
| Ni1P1Y1_ICSD_646184       | metal      | metal     |

Supplementary Table 535. Five-fold cross validated predictions for the metal/insulator classification (527/598).

| system                | calculated | predicted |
|-----------------------|------------|-----------|
| Ni1P1Zr1_ICSD_76678   | metal      | metal     |
| Ni1P1Zr2_ICSD_84826   | metal      | metal     |
| Ni1P1Zr4_ICSD_646191  | metal      | metal     |
| Ni1P1_ICSD_188064     | metal      | metal     |
| Ni1P1_ICSD_261827     | metal      | metal     |
| Ni1P2Ta1_ICSD_646158  | metal      | metal     |
| Ni1P2W1_ICSD_646178   | metal      | metal     |
| Ni1P2Zr1_ICSD_646193  | metal      | metal     |
| Ni1P2Zr2_ICSD_646195  | metal      | metal     |
| Ni1P2_ICSD_22221      | metal      | metal     |
| Ni1P2_ICSD_91560      | insulator  | metal     |
| Ni1P3Si2_ICSD_79376   | metal      | insulator |
| Ni1P3W2_ICSD_41818    | metal      | metal     |
| Ni1P3_ICSD_92394      | metal      | metal     |
| Ni1P4Si3_ICSD_39452   | insulator  | metal     |
| Ni1Pb1_ICSD_108642    | metal      | metal     |
| Ni1Pb3Tb5_ICSD_152603 | metal      | metal     |
| Ni1Pd1Si1_ICSD_646219 | metal      | metal     |
| Ni1Pd1Te1_ICSD_419759 | metal      | metal     |
| Ni1Pd2Te2_ICSD_416512 | metal      | metal     |
| Ni1Pr1Sb2_ICSD_646263 | metal      | metal     |
| Ni1Pr1Sb2_ICSD_658210 | metal      | metal     |
| Ni1Pr1Si2_ICSD_658590 | metal      | metal     |
| Ni1Pr1Si2_ICSD_71693  | metal      | metal     |
| Ni1Pr1Si2_ICSD_71694  | metal      | metal     |
| Ni1Pr1Sn1_ICSD_419192 | metal      | metal     |
| Ni1Pr1Sn1_ICSD_646288 | metal      | metal     |
| Ni1Pr1Sn2_ICSD_646289 | metal      | metal     |
| Ni1Pr1Zn1_ICSD_54295  | metal      | metal     |
| Ni1Pr1_ICSD_646227    | metal      | metal     |
| Ni1Pr1_ICSD_646247    | metal      | metal     |
| Ni1Pr1_ICSD_99823     | metal      | metal     |
| Ni1Pt1_ICSD_105316    | metal      | metal     |
| Ni1Pu1_ICSD_150528    | metal      | metal     |
| Ni1Rh2S4_ICSD_646317  | metal      | metal     |
| Ni1Rh2Se4_ICSD_15214  | metal      | metal     |
| Ni1Rh2Sn1_ICSD_105327 | metal      | metal     |
| Ni1S17U8_ICSD_646400  | insulator  | insulator |
| Ni1S1Sb1_ICSD_646369  | metal      | metal     |
| Ni1S1_ICSD_151603     | insulator  | insulator |
| Ni1S1_ICSD_40054      | metal      | metal     |
| Ni1S1_ICSD_42493      | insulator  | insulator |
| Ni1S1_ICSD_654938     | metal      | metal     |
| Ni1S2_ICSD_166474     | insulator  | metal     |
| Ni1S2_ICSD_169570     | insulator  | metal     |
| Ni1S2_ICSD_169571     | insulator  | metal     |
| Ni1S2_ICSD_169572     | metal      | metal     |
| Ni1S2_ICSD_169573     | metal      | metal     |
| Ni1S2_ICSD_169574     | metal      | metal     |
| Ni1S2_ICSD_169575     | metal      | insulator |

Supplementary Table 536. Five-fold cross validated predictions for the metal/insulator classification (528/598).

| system                | calculated | predicted |
|-----------------------|------------|-----------|
| Ni1S2.ICSD.169577     | metal      | insulator |
| Ni1S2.ICSD.169578     | metal      | metal     |
| Ni1S2.ICSD.659263     | metal      | insulator |
| Ni1S4V2.ICSD.35140    | metal      | metal     |
| Ni1S4V2.ICSD.646403   | metal      | metal     |
| Ni1S5Ta2.ICSD.61147   | metal      | metal     |
| Ni1S6Ti3.ICSD.26312   | metal      | metal     |
| Ni1S6V3.ICSD.35142    | metal      | metal     |
| Ni1S8Ti4.ICSD.646389  | metal      | metal     |
| Ni1Sb1Sc1.ICSD.40296  | metal      | metal     |
| Ni1Sb1Se1.ICSD.646435 | metal      | metal     |
| Ni1Sb1Si1.ICSD.646436 | metal      | metal     |
| Ni1Sb1Tb1.ICSD.44951  | insulator  | insulator |
| Ni1Sb1Ti1.ICSD.182482 | metal      | metal     |
| Ni1Sb1Ti1.ICSD.646450 | metal      | metal     |
| Ni1Sb1Tm1.ICSD.105304 | metal      | metal     |
| Ni1Sb1Tm1.ICSD.44952  | metal      | metal     |
| Ni1Sb1V1.ICSD.76702   | metal      | metal     |
| Ni1Sb1Y1.ICSD.105331  | insulator  | metal     |
| Ni1Sb1Yb1.ICSD.105332 | metal      | metal     |
| Ni1Sb1Zn1.ICSD.240198 | metal      | metal     |
| Ni1Sb1Zr1.ICSD.408195 | metal      | metal     |
| Ni1Sb1.ICSD.646431    | metal      | metal     |
| Ni1Sb2Tb1.ICSD.658214 | metal      | metal     |
| Ni1Sb2U1.ICSD.656841  | metal      | metal     |
| Ni1Sb2.ICSD.646411    | metal      | metal     |
| Ni1Sb7Zr3.ICSD.162589 | metal      | metal     |
| Ni1Sc1Si1.ICSD.105337 | metal      | metal     |
| Ni1Sc1Si1.ICSD.41800  | metal      | metal     |
| Ni1Sc1Sn1.ICSD.105338 | metal      | metal     |
| Ni1Sc1.ICSD.105333    | metal      | metal     |
| Ni1Sc2.ICSD.646475    | metal      | metal     |
| Ni1Sc3Si3.ICSD.48004  | metal      | metal     |
| Ni1Sc6Te2.ICSD.90082  | metal      | metal     |
| Ni1Se17U8.ICSD.601638 | metal      | metal     |
| Ni1Se1.ICSD.42596     | metal      | metal     |
| Ni1Se1.ICSD.646507    | metal      | metal     |
| Ni1Se1.ICSD.646520    | metal      | metal     |
| Ni1Se2.ICSD.646532    | metal      | metal     |
| Ni1Se3U1.ICSD.646553  | metal      | insulator |
| Ni1Se4Ti2.ICSD.646544 | metal      | metal     |
| Ni1Se4V2.ICSD.23970   | metal      | metal     |
| Ni1Se4V2.ICSD.646555  | metal      | metal     |
| Ni1Se7Ta2.ICSD.41619  | metal      | metal     |
| Ni1Si1Th1.ICSD.646618 | metal      | metal     |
| Ni1Si1Ti1.ICSD.165253 | metal      | metal     |
| Ni1Si1U1.ICSD.50082   | metal      | metal     |
| Ni1Si1V1.ICSD.646660  | metal      | metal     |
| Ni1Si1Y1.ICSD.79598   | metal      | metal     |
| Ni1Si1Zr1.ICSD.646693 | metal      | metal     |

Supplementary Table 537. Five-fold cross validated predictions for the metal/insulator classification (529/598).

| system                | calculated | predicted |
|-----------------------|------------|-----------|
| Ni1Si1.ICSD.164764    | metal      | metal     |
| Ni1Si1.ICSD.187621    | metal      | metal     |
| Ni1Si1.ICSD.187622    | metal      | metal     |
| Ni1Si1.ICSD.30626     | metal      | metal     |
| Ni1Si2Tb1.ICSD.658586 | metal      | metal     |
| Ni1Si2Tb3.ICSD.646606 | metal      | metal     |
| Ni1Si2Tm1.ICSD.646632 | metal      | metal     |
| Ni1Si2Yb1.ICSD.646675 | metal      | metal     |
| Ni1Si2.ICSD.646567    | metal      | metal     |
| Ni1Si3Sr1.ICSD.174268 | metal      | metal     |
| Ni1Sn1Tb1.ICSD.54301  | metal      | metal     |
| Ni1Sn1Th1.ICSD.105367 | insulator  | metal     |
| Ni1Sn1Th1.ICSD.646771 | metal      | metal     |
| Ni1Sn1Ti1.ICSD.105368 | metal      | insulator |
| Ni1Sn1Ti1.ICSD.174568 | insulator  | metal     |
| Ni1Sn1U1.ICSD.105372  | metal      | metal     |
| Ni1Sn1U1.ICSD.646795  | metal      | metal     |
| Ni1Sn1U1.ICSD.646797  | metal      | metal     |
| Ni1Sn1Y1.ICSD.105379  | metal      | metal     |
| Ni1Sn1Yb1.ICSD.54360  | metal      | metal     |
| Ni1Sn1Zr1.ICSD.105382 | insulator  | metal     |
| Ni1Sn1Zr1.ICSD.646828 | metal      | insulator |
| Ni1Sn3Sr1.ICSD.105366 | metal      | metal     |
| Ni1Ta1Te5.ICSD.73314  | metal      | metal     |
| Ni1Ta2.ICSD.105387    | metal      | metal     |
| Ni1Ta5.ICSD.646845    | metal      | metal     |
| Ni1Tb1Zn1.ICSD.416821 | metal      | metal     |
| Ni1Tb1.ICSD.105394    | metal      | metal     |
| Ni1Tb1.ICSD.105395    | metal      | metal     |
| Ni1Tb1.ICSD.646875    | metal      | metal     |
| Ni1Tb3.ICSD.646861    | metal      | metal     |
| Ni1Te1.ICSD.42557     | metal      | metal     |
| Ni1Te1.ICSD.76730     | metal      | metal     |
| Ni1Te2.ICSD.646892    | metal      | metal     |
| Ni1Te2.ICSD.646897    | metal      | metal     |
| Ni1Th1.ICSD.105403    | metal      | metal     |
| Ni1Ti1.ICSD.150943    | metal      | metal     |
| Ni1Ti1.ICSD.156442    | metal      | metal     |
| Ni1Ti1.ICSD.157607    | metal      | metal     |
| Ni1Ti1.ICSD.161458    | metal      | metal     |
| Ni1Ti1.ICSD.164154    | metal      | metal     |
| Ni1Ti1.ICSD.166372    | metal      | metal     |
| Ni1Ti1.ICSD.187467    | metal      | metal     |
| Ni1Ti1.ICSD.187469    | metal      | metal     |
| Ni1Ti2.ICSD.604523    | metal      | metal     |
| Ni1Ti1.ICSD.105427    | metal      | metal     |
| Ni1U6.ICSD.105435     | metal      | metal     |
| Ni1V3.ICSD.647028     | metal      | metal     |
| Ni1Y1.ICSD.105457     | metal      | metal     |
| Ni1Y1.ICSD.647049     | metal      | metal     |

Supplementary Table 538. Five-fold cross validated predictions for the metal/insulator classification (530/598).

| system                    | calculated | predicted |
|---------------------------|------------|-----------|
| Ni1Y3_ICSD_658309         | metal      | metal     |
| Ni1Yb1_ICSD_647130        | metal      | metal     |
| Ni1Yb3_ICSD_659942        | metal      | metal     |
| Ni1Zn1_ICSD_105469        | metal      | metal     |
| Ni1Zn1_ICSD_105472        | metal      | metal     |
| Ni1Zn1_ICSD_647135        | metal      | metal     |
| Ni1Zr1_ICSD_647164        | metal      | metal     |
| Ni1Zr2_ICSD_102805        | metal      | metal     |
| Ni1_ICSD_163354           | metal      | metal     |
| Ni1_ICSD_183264           | metal      | metal     |
| Ni1_ICSD_76668            | metal      | metal     |
| Ni21P6Sn2_ICSD_419774     | metal      | metal     |
| Ni21Zr8_ICSD_402864       | metal      | metal     |
| Ni23Zr6_ICSD_600782       | metal      | metal     |
| Ni2O12P4_ICSD_35730       | insulator  | insulator |
| Ni2O1Ti4_ICSD_15809       | metal      | metal     |
| Ni2O1Zr4_ICSD_74996       | metal      | metal     |
| Ni2O4Si1_ICSD_40994       | insulator  | insulator |
| Ni2O6P2Sc2Sr4_ICSD_180269 | metal      | metal     |
| Ni2O7P2_ICSD_100194       | insulator  | insulator |
| Ni2O7P2_ICSD_30433        | insulator  | insulator |
| Ni2O7Sb2_ICSD_247303      | metal      | insulator |
| Ni2O7V2_ICSD_2358         | insulator  | insulator |
| Ni2O8Te3_ICSD_50703       | insulator  | insulator |
| Ni2P1Sn1_ICSD_61097       | metal      | metal     |
| Ni2P1_ICSD_105306         | metal      | metal     |
| Ni2P2Pr1_ICSD_646127      | metal      | metal     |
| Ni2P2S6_ICSD_657314       | insulator  | metal     |
| Ni2P2Sr1_ICSD_85406       | metal      | metal     |
| Ni2P2Tb1_ICSD_646159      | metal      | metal     |
| Ni2P2Th1_ICSD_74785       | metal      | metal     |
| Ni2P2Th1_ICSD_74786       | metal      | metal     |
| Ni2P2Tm1_ICSD_646167      | metal      | metal     |
| Ni2P2U1_ICSD_76674        | metal      | metal     |
| Ni2P2Y1_ICSD_646183       | metal      | metal     |
| Ni2P2Yb1_ICSD_646187      | metal      | metal     |
| Ni2P2Zr1_ICSD_76679       | metal      | metal     |
| Ni2Pr1Sb2_ICSD_646261     | metal      | metal     |
| Ni2Pr1Sb2_ICSD_646262     | metal      | metal     |
| Ni2Pr1Si2_ICSD_169860     | metal      | metal     |
| Ni2Pr1Sn2_ICSD_646290     | metal      | metal     |
| Ni2Pr1_ICSD_105310        | metal      | metal     |
| Ni2Pr1_ICSD_646237        | metal      | metal     |
| Ni2Pr1_ICSD_646252        | metal      | metal     |
| Ni2Pr1_ICSD_646256        | metal      | metal     |
| Ni2Pr2Sn1_ICSD_425429     | metal      | metal     |
| Ni2Pu1Si2_ICSD_604292     | metal      | metal     |
| Ni2Pu1_ICSD_105320        | metal      | metal     |
| Ni2Pu2Sn1_ICSD_150164     | metal      | metal     |
| Ni2S2Tl1_ICSD_646396      | metal      | metal     |

Supplementary Table 539. Five-fold cross validated predictions for the metal/insulator classification (531/598).

| system                  | calculated | predicted |
|-------------------------|------------|-----------|
| Ni2S6Ta9_ICSD_63591     | metal      | metal     |
| Ni2Sb1Te2_ICSD_99117    | metal      | metal     |
| Ni2Sb1Ti1_ICSD_76700    | metal      | metal     |
| Ni2Sb1Zr1_ICSD_162585   | metal      | metal     |
| Ni2Sb1Zr1_ICSD_76703    | metal      | metal     |
| Ni2Sb2Sr1_ICSD_646442   | metal      | metal     |
| Ni2Sb2Tb1_ICSD_646443   | metal      | metal     |
| Ni2Sc1Si2_ICSD_646482   | metal      | metal     |
| Ni2Sc1Sn1_ICSD_105339   | metal      | metal     |
| Ni2Sc1_ICSD_105335      | metal      | metal     |
| Ni2Sc2Sn1_ICSD_54348    | metal      | metal     |
| Ni2Sc2Sn1_ICSD_658917   | metal      | metal     |
| Ni2Sc3Si3_ICSD_65760    | metal      | metal     |
| Ni2Se1Ta1Te1_ICSD_86174 | metal      | metal     |
| Ni2Se2Tl1_ICSD_646550   | metal      | metal     |
| Ni2Se2Tl1_ICSD_646551   | metal      | metal     |
| Ni2Se8Ta11_ICSD_40378   | metal      | metal     |
| Ni2Si1Ta3_ICSD_76717    | metal      | metal     |
| Ni2Si1V3_ICSD_646652    | metal      | metal     |
| Ni2Si1Zn3_ICSD_42980    | metal      | metal     |
| Ni2Si1_ICSD_165257      | metal      | metal     |
| Ni2Si1_ICSD_24642       | metal      | metal     |
| Ni2Si2Tb1_ICSD_76718    | metal      | metal     |
| Ni2Si2Th1_ICSD_18159    | metal      | metal     |
| Ni2Si2U1_ICSD_25684     | metal      | metal     |
| Ni2Si2Y1_ICSD_646667    | metal      | metal     |
| Ni2Si2Yb1_ICSD_646672   | metal      | metal     |
| Ni2Si2Zr1_ICSD_20317    | metal      | metal     |
| Ni2Sn1Tb6_ICSD_646766   | metal      | metal     |
| Ni2Sn1Ti1_ICSD_105370   | metal      | metal     |
| Ni2Sn1Tm2_ICSD_425432   | metal      | metal     |
| Ni2Sn1U1_ICSD_646802    | metal      | metal     |
| Ni2Sn1U2_ICSD_602807    | metal      | metal     |
| Ni2Sn1V1_ICSD_105376    | metal      | metal     |
| Ni2Sn1Y2_ICSD_186294    | metal      | metal     |
| Ni2Sn1Yb1_ICSD_105381   | metal      | metal     |
| Ni2Sn1Zr1_ICSD_105383   | metal      | metal     |
| Ni2Sn1Zr2_ICSD_405564   | metal      | metal     |
| Ni2Sn1Zr2_ICSD_54303    | metal      | metal     |
| Ni2Sn2Th1_ICSD_602652   | metal      | metal     |
| Ni2Sn2U1_ICSD_602762    | metal      | metal     |
| Ni2Ta1Te3_ICSD_82605    | metal      | metal     |
| Ni2Ta1_ICSD_105388      | metal      | metal     |
| Ni2Ta2Te4_ICSD_71063    | metal      | metal     |
| Ni2Tb1_ICSD_154459      | metal      | metal     |
| Ni2Tb2Zn1_ICSD_416820   | metal      | metal     |
| Ni2Tb3_ICSD_646858      | metal      | metal     |
| Ni2Th1_ICSD_646934      | metal      | metal     |
| Ni2Tm1_ICSD_646992      | metal      | metal     |
| Ni2Tm1_ICSD_646993      | metal      | metal     |

Supplementary Table 540. Five-fold cross validated predictions for the metal/insulator classification (532/598).

| system                | calculated | predicted |
|-----------------------|------------|-----------|
| Ni2U1.ICSD_105436     | metal      | metal     |
| Ni2U1.ICSD_260985     | metal      | metal     |
| Ni2U1.ICSD_647006     | metal      | metal     |
| Ni2V1.ICSD_647027     | metal      | metal     |
| Ni2Y1.ICSD_183094     | metal      | metal     |
| Ni2Yb1.ICSD_105466    | metal      | metal     |
| Ni2Zn11.ICSD_647140   | metal      | metal     |
| Ni2Zr1.ICSD_105481    | metal      | metal     |
| Ni31Si12.ICSD_9106    | metal      | metal     |
| Ni3O1Ti3.ICSD_29055   | metal      | metal     |
| Ni3O6Te1.ICSD_27076   | insulator  | insulator |
| Ni3O8P2.ICSD_153159   | insulator  | insulator |
| Ni3O8P2.ICSD_158523   | insulator  | insulator |
| Ni3O8V2.ICSD_2646     | insulator  | insulator |
| Ni3P1.ICSD_98373      | metal      | metal     |
| Ni3Pb2S2.ICSD_159363  | insulator  | metal     |
| Ni3Pb2S2.ICSD_417632  | metal      | metal     |
| Ni3Pb2Se2.ICSD_646211 | metal      | metal     |
| Ni3Pr1.ICSD_646231    | metal      | metal     |
| Ni3Pt1.ICSD_151193    | metal      | metal     |
| Ni3Rb2S4.ICSD_646311  | insulator  | insulator |
| Ni3Rb2Se4.ICSD_78976  | insulator  | insulator |
| Ni3S2Sn2.ICSD_646380  | metal      | metal     |
| Ni3S2Ti2.ICSD_108893  | metal      | metal     |
| Ni3S2.ICSD_10424      | metal      | metal     |
| Ni3S2.ICSD_180766     | metal      | metal     |
| Ni3S2.ICSD_180767     | metal      | metal     |
| Ni3S4.ICSD_57435      | metal      | metal     |
| Ni3S8Ta2.ICSD_201972  | insulator  | insulator |
| Ni3Sb1.ICSD_646421    | metal      | metal     |
| Ni3Sb1.ICSD_76693     | metal      | metal     |
| Ni3Sb2Zn1.ICSD_240197 | metal      | metal     |
| Ni3Sb4U3.ICSD_657094  | insulator  | metal     |
| Ni3Sb4Zr3.ICSD_87995  | insulator  | metal     |
| Ni3Sc2Si1.ICSD_646484 | metal      | metal     |
| Ni3Se2.ICSD_646514    | metal      | metal     |
| Ni3Se4.ICSD_42558     | metal      | metal     |
| Ni3Se4.ICSD_76710     | metal      | metal     |
| Ni3Se8Ta2.ICSD_80881  | insulator  | insulator |
| Ni3Si1.ICSD_646584    | metal      | metal     |
| Ni3Si1.ICSD_646585    | metal      | metal     |
| Ni3Si5Tb2.ICSD_658648 | metal      | metal     |
| Ni3Si5Y2.ICSD_84206   | metal      | metal     |
| Ni3Sn1.ICSD_105353    | metal      | metal     |
| Ni3Sn1.ICSD_105354    | metal      | metal     |
| Ni3Sn1.ICSD_646747    | metal      | metal     |
| Ni3Sn1.ICSD_646751    | metal      | metal     |
| Ni3Sn2.ICSD_105358    | metal      | metal     |
| Ni3Sn4Th3.ICSD_657422 | metal      | metal     |
| Ni3Sn4U3.ICSD_646805  | metal      | metal     |

Supplementary Table 541. Five-fold cross validated predictions for the metal/insulator classification (533/598).

| system                      | calculated | predicted |
|-----------------------------|------------|-----------|
| Ni3Sn4.ICSD_646757          | metal      | metal     |
| Ni3Ta1.ICSD_105390          | metal      | metal     |
| Ni3Ta1.ICSD_105391          | metal      | metal     |
| Ni3Ta1.ICSD_54304           | metal      | metal     |
| Ni3Tb1.ICSD_646874          | metal      | metal     |
| Ni3Te2.ICSD_99271           | metal      | metal     |
| Ni3Th7.ICSD_105406          | metal      | metal     |
| Ni3Ti0.67Zr0.33.ICSD_646978 | metal      | metal     |
| Ni3Ti1.ICSD_646944          | metal      | metal     |
| Ni3V1.ICSD_647034           | metal      | metal     |
| Ni3Y1.ICSD_105461           | metal      | metal     |
| Ni3Y1.ICSD_647061           | metal      | metal     |
| Ni3Y1.ICSD_647095           | metal      | metal     |
| Ni3Zr1.ICSD_647149          | metal      | metal     |
| Ni4O8Sr1.ICSD_40469         | insulator  | insulator |
| Ni4P2Tb1.ICSD_76673         | metal      | metal     |
| Ni4P2U1.ICSD_85896          | metal      | metal     |
| Ni4P2Y1.ICSD_601110         | metal      | metal     |
| Ni4P2Yb1.ICSD_90270         | metal      | metal     |
| Ni4P2Zr1.ICSD_40435         | metal      | metal     |
| Ni4P4Ta5.ICSD_646154        | metal      | metal     |
| Ni4Sc1Sn1.ICSD_105340       | metal      | metal     |
| Ni4Sc3Si4.ICSD_646480       | metal      | metal     |
| Ni4Sn13Yb7.ICSD_420766      | metal      | metal     |
| Ni4Sn1U1.ICSD_105375        | metal      | metal     |
| Ni4Sn1Zr1.ICSD_105385       | metal      | metal     |
| Ni4Sn2Sr1.ICSD_418131       | metal      | metal     |
| Ni4Ti3.ICSD_105422          | metal      | metal     |
| Ni4U1Zn1.ICSD_105438        | metal      | metal     |
| Ni4W1.ICSD_105452           | metal      | metal     |
| Ni4Zn1Zr1.ICSD_105477       | metal      | metal     |
| Ni5P2.ICSD_646116           | metal      | metal     |
| Ni5P3Sr1.ICSD_33914         | metal      | metal     |
| Ni5P4.ICSD_249340           | metal      | metal     |
| Ni5Pr1.ICSD_105312          | metal      | metal     |
| Ni5Pr1.ICSD_646226          | metal      | metal     |
| Ni5Pu1.ICSD_105323          | metal      | metal     |
| Ni5Sc1.ICSD_105336          | metal      | metal     |
| Ni5Sc1.ICSD_646468          | metal      | metal     |
| Ni5Si3U1.ICSD_23037         | metal      | metal     |
| Ni5Si3Y1.ICSD_23036         | metal      | metal     |
| Ni5Tb1.ICSD_186005          | metal      | metal     |
| Ni5Th1.ICSD_105408          | metal      | metal     |
| Ni5Th1.ICSD_646923          | metal      | metal     |
| Ni5Th1.ICSD_646926          | metal      | metal     |
| Ni5Tm1.ICSD_105433          | metal      | metal     |
| Ni5U1.ICSD_105437           | metal      | metal     |
| Ni5Y1.ICSD_54422            | metal      | metal     |
| Ni5Yb1.ICSD_105468          | metal      | metal     |
| Ni5Yb1.ICSD_647109          | metal      | metal     |

Supplementary Table 542. Five-fold cross validated predictions for the metal/insulator classification (534/598).

| system                   | calculated | predicted |
|--------------------------|------------|-----------|
| Ni5Zr1_ICSD_150648       | metal      | metal     |
| Ni6P17Pr6_ICSD_646125    | metal      | metal     |
| Ni6Pb1Y12_ICSD_54614     | metal      | metal     |
| Ni6Pr3Si2_ICSD_646283    | metal      | metal     |
| Ni6Si2Tb3_ICSD_646615    | metal      | metal     |
| Ni6Si2Yb3_ICSD_646677    | metal      | metal     |
| Ni7Sc2_ICSD_646467       | metal      | metal     |
| Ni7Tb2_ICSD_646862       | metal      | metal     |
| Ni7Th2_ICSD_646927       | metal      | metal     |
| Ni7Y2_ICSD_108650        | metal      | metal     |
| Ni7Y2_ICSD_647066        | metal      | metal     |
| Ni9P5Sr1_ICSD_67898      | metal      | metal     |
| O1.03Sc1_ICSD_61627      | metal      | metal     |
| O10P2Re2_ICSD_420988     | metal      | insulator |
| O10P2Sn5_ICSD_418458     | insulator  | insulator |
| O10P2Sr1V2_ICSD_280073   | insulator  | insulator |
| O10P2U2_ICSD_75358       | insulator  | insulator |
| O10Ru3Sr2_ICSD_50707     | metal      | insulator |
| O10Sb2Ti10_ICSD_4124     | insulator  | insulator |
| O10U1V3_ICSD_73610       | metal      | insulator |
| O11P2W2_ICSD_24072       | insulator  | metal     |
| O11Pb1Pt4Sr4_ICSD_249144 | insulator  | insulator |
| O11Pr2Te4_ICSD_413655    | insulator  | insulator |
| O11Re2V2_ICSD_23423      | metal      | insulator |
| O11Sr1Ta4_ICSD_79704     | insulator  | insulator |
| O11Sr3Te4_ICSD_56798     | insulator  | insulator |
| O11Te4Yb2_ICSD_413663    | metal      | insulator |
| O11Ti6_ICSD_90958        | metal      | insulator |
| O12P4Ti4_ICSD_21139      | insulator  | insulator |
| O12P4U1_ICSD_20736       | insulator  | insulator |
| O12Pr3Sb5_ICSD_67020     | metal      | insulator |
| O12Pr7_ICSD_655511       | metal      | insulator |
| O12Re1Sc6_ICSD_245004    | insulator  | insulator |
| O12S1Si3Yb5_ICSD_391123  | metal      | insulator |
| O12S3Sc2_ICSD_411221     | insulator  | insulator |
| O12Sb5Yb3_ICSD_20945     | metal      | insulator |
| O12Se4_ICSD_18180        | insulator  | insulator |
| O12Si4Sr4_ICSD_32678     | insulator  | insulator |
| O12Tb7_ICSD_73822        | metal      | insulator |
| O12Te1Ti6_ICSD_37134     | metal      | insulator |
| O12Te1Y6_ICSD_247820     | insulator  | insulator |
| O12U1Y6_ICSD_23966       | insulator  | insulator |
| O12W1Y6_ICSD_100196      | insulator  | insulator |
| O13P4Y2_ICSD_95880       | insulator  | insulator |
| O13Rb2Ti6_ICSD_23878     | insulator  | insulator |
| O13Sc2Te5_ICSD_417712    | insulator  | insulator |
| O13Sr2Ti6_ICSD_10455     | insulator  | insulator |
| O13Te5Yb2_ICSD_413668    | metal      | insulator |
| O13Te6Zn1_ICSD_249328    | insulator  | insulator |
| O13V6_ICSD_50409         | metal      | insulator |

Supplementary Table 543. Five-fold cross validated predictions for the metal/insulator classification (535/598).

| system                  | calculated | predicted |
|-------------------------|------------|-----------|
| O13V6_ICSD_62117        | metal      | metal     |
| O14P4Pb1V2_ICSD_78511   | insulator  | insulator |
| O14P4Rb2Zn3_ICSD_30965  | insulator  | insulator |
| O14P4Sb2_ICSD_202685    | insulator  | insulator |
| O14P4Sr1V2_ICSD_86433   | metal      | insulator |
| O14Pt1Si2Sr8_ICSD_63003 | insulator  | insulator |
| O14Rb2Te2U3_ICSD_414063 | insulator  | insulator |
| O14Rb3V5_ICSD_420851    | insulator  | insulator |
| O14Ru3Sn15_ICSD_401827  | insulator  | insulator |
| O14Si4Sr2Ti2_ICSD_83362 | insulator  | insulator |
| O14Ti3V5_ICSD_248229    | insulator  | insulator |
| O15Rh5Sr6_ICSD_93117    | insulator  | metal     |
| O15S2Sb6_ICSD_341       | insulator  | insulator |
| O18Ti10_ICSD_31399      | insulator  | insulator |
| O1Os1P1Pr1_ICSD_419464  | metal      | metal     |
| O1P1Pr1Zn1_ICSD_416476  | insulator  | insulator |
| O1P1Y1Zn1_ICSD_418523   | insulator  | insulator |
| O1P2Sr4_ICSD_33903      | insulator  | insulator |
| O1Pa1_ICSD_647256       | metal      | metal     |
| O1Pb1Sr3_ICSD_100790    | metal      | metal     |
| O1Pb1Yb3_ICSD_413389    | metal      | metal     |
| O1Pb1_ICSD_15402        | insulator  | insulator |
| O1Pb1_ICSD_36250        | insulator  | insulator |
| O1Pb1_ICSD_62846        | insulator  | insulator |
| O1Pb2_ICSD_28838        | metal      | metal     |
| O1Pd1_ICSD_185482       | insulator  | metal     |
| O1Pd1_ICSD_28837        | metal      | metal     |
| O1Pd1_ICSD_41617        | metal      | metal     |
| O1Pd1_ICSD_77650        | metal      | metal     |
| O1Pd2Zr4_ICSD_97386     | metal      | metal     |
| O1Pd2_ICSD_77651        | metal      | metal     |
| O1Pr1Sb1Zn1_ICSD_182895 | metal      | insulator |
| O1Pr1Sb1Zn1_ICSD_380342 | insulator  | metal     |
| O1Pr1_ICSD_77652        | metal      | metal     |
| O1Pt1_ICSD_105543       | metal      | metal     |
| O1Pt1_ICSD_164290       | insulator  | metal     |
| O1Pu1_ICSD_647327       | metal      | metal     |
| O1Rb2_ICSD_77676        | insulator  | insulator |
| O1Rb6_ICSD_29336        | metal      | metal     |
| O1S1U1_ICSD_421031      | insulator  | metal     |
| O1S1Zr1_ICSD_31721      | insulator  | insulator |
| O1S1Zr1_ICSD_36111      | insulator  | insulator |
| O1S2Sb2_ICSD_189831     | insulator  | insulator |
| O1S2Tb2_ICSD_167087     | insulator  | insulator |
| O1S2Y2_ICSD_67503       | insulator  | insulator |
| O1S2Yb2_ICSD_67381      | metal      | metal     |
| O1S8_ICSD_15998         | insulator  | insulator |
| O1Se1Th1_ICSD_26654     | insulator  | insulator |
| O1Se1U1_ICSD_73408      | metal      | insulator |
| O1Si1Zr1_ICSD_25731     | metal      | metal     |

Supplementary Table 544. Five-fold cross validated predictions for the metal/insulator classification (536/598).

| system                  | calculated | predicted |
|-------------------------|------------|-----------|
| O1Sn1Sr3.ICSD_201036    | metal      | metal     |
| O1Sn1Yb3.ICSD_413388    | metal      | metal     |
| O1Sn1.ICSD_15516        | insulator  | insulator |
| O1Sn1.ICSD_16481        | insulator  | insulator |
| O1Sn1.ICSD_20624        | insulator  | insulator |
| O1Sn1.ICSD_424729       | insulator  | insulator |
| O1Sn1.ICSD_60619        | insulator  | insulator |
| O1Sr1.ICSD_181275       | insulator  | insulator |
| O1Sr1.ICSD_26960        | insulator  | insulator |
| O1Ta1.ICSD_647482       | metal      | metal     |
| O1Ta2.ICSD_28387        | metal      | metal     |
| O1Ta4.ICSD_76022        | metal      | metal     |
| O1Te1Th1.ICSD_65950     | insulator  | insulator |
| O1Ti1.ICSD_647558       | metal      | metal     |
| O1Ti2Zr1.ICSD_9389      | metal      | metal     |
| O1Ti2.ICSD_23574        | metal      | metal     |
| O1Ti3.ICSD_20041        | metal      | metal     |
| O1Ti3.ICSD_23575        | metal      | metal     |
| O1Ti3.ICSD_36055        | metal      | metal     |
| O1Ti6.ICSD_17009        | metal      | metal     |
| O1Ti6.ICSD_23576        | metal      | metal     |
| O1Ti2.ICSD_16220        | insulator  | metal     |
| O1Ti2.ICSD_77699        | insulator  | insulator |
| O1U1.ICSD_24223         | metal      | metal     |
| O1V1.ICSD_28681         | insulator  | metal     |
| O1V1.ICSD_77705         | metal      | insulator |
| O1V3Zr3.ICSD_38407      | metal      | metal     |
| O1V8.ICSD_166600        | metal      | metal     |
| O1W3.ICSD_150496        | metal      | metal     |
| O1Yb1.ICSD_77710        | insulator  | metal     |
| O1Zn1.ICSD_163382       | metal      | metal     |
| O1Zn1.ICSD_166357       | insulator  | insulator |
| O1Zn1.ICSD_180052       | insulator  | insulator |
| O1Zn1.ICSD_181039       | insulator  | insulator |
| O1Zn1.ICSD_182357       | insulator  | insulator |
| O1Zr1.ICSD_76019        | metal      | metal     |
| O1Zr2.ICSD_77714        | metal      | metal     |
| O1Zr3.ICSD_23402        | metal      | metal     |
| O1Zr3.ICSD_27023        | metal      | metal     |
| O1Zr3.ICSD_88320        | metal      | metal     |
| O1.ICSD_92775           | insulator  | insulator |
| O23Rb6Si10.ICSD_250379  | insulator  | insulator |
| O23Rb6U5V2.ICSD_96479   | insulator  | insulator |
| O24P6S1Sr10.ICSD_410783 | insulator  | insulator |
| O25P6Si5.ICSD_6197      | insulator  | insulator |
| O26Si4Sr3Ta6.ICSD_15936 | insulator  | insulator |
| O2Os1.ICSD_30400        | metal      | metal     |
| O2P1Ti3.ICSD_76020      | metal      | metal     |
| O2P1Zr3.ICSD_76021      | metal      | metal     |
| O2Pa1.ICSD_647247       | metal      | metal     |

Supplementary Table 545. Five-fold cross validated predictions for the metal/insulator classification (537/598).

| system               | calculated | predicted |
|----------------------|------------|-----------|
| O2Pb1Pd1.ICSD_2277   | insulator  | metal     |
| O2Pb1.ICSD_23292     | insulator  | metal     |
| O2Pb1.ICSD_415269    | metal      | insulator |
| O2Pb1.ICSD_77648     | metal      | insulator |
| O2Pd1.ICSD_647283    | metal      | insulator |
| O2Pr1.ICSD_105541    | metal      | insulator |
| O2Pr1.ICSD_380398    | insulator  | insulator |
| O2Pr2S1.ICSD_109329  | insulator  | insulator |
| O2Pr2Se1.ICSD_94415  | insulator  | insulator |
| O2Pr2Te1.ICSD_89559  | metal      | insulator |
| O2Pt1.ICSD_24923     | insulator  | insulator |
| O2Pt1.ICSD_647316    | metal      | insulator |
| O2Pt1.ICSD_647320    | insulator  | insulator |
| O2Pt1.ICSD_76431     | insulator  | insulator |
| O2Pt1.ICSD_77654     | metal      | metal     |
| O2Pu1.ICSD_186183    | metal      | metal     |
| O2Pu2S1.ICSD_647333  | metal      | metal     |
| O2Rb1Sb1.ICSD_411216 | insulator  | insulator |
| O2Rb1Sc1.ICSD_1270   | insulator  | insulator |
| O2Rb1Sc1.ICSD_31959  | insulator  | insulator |
| O2Rb1Ti1.ICSD_33554  | insulator  | insulator |
| O2Rb1Tm1.ICSD_15162  | metal      | insulator |
| O2Rb1Y1.ICSD_49651   | insulator  | insulator |
| O2Rb1Yb1.ICSD_15163  | insulator  | insulator |
| O2Rb1.ICSD_180564    | metal      | metal     |
| O2Rb2Sn1.ICSD_24805  | insulator  | insulator |
| O2Rb2Zn1.ICSD_1119   | insulator  | insulator |
| O2Rb2.ICSD_180560    | insulator  | insulator |
| O2Rb9.ICSD_1239      | metal      | metal     |
| O2Re1.ICSD_154021    | metal      | metal     |
| O2Re1.ICSD_24060     | metal      | metal     |
| O2Re1.ICSD_647349    | metal      | metal     |
| O2Rh1.ICSD_647367    | metal      | metal     |
| O2Ru1.ICSD_290498    | insulator  | metal     |
| O2Ru1.ICSD_66939     | metal      | metal     |
| O2Ru1.ICSD_84618     | metal      | metal     |
| O2Ru1.ICSD_84619     | metal      | metal     |
| O2S1Sc2.ICSD_2450    | insulator  | insulator |
| O2S1Tb2.ICSD_109331  | insulator  | insulator |
| O2S1Tm2.ICSD_400048  | insulator  | insulator |
| O2S1Y2.ICSD_154582   | insulator  | insulator |
| O2S1Yb2.ICSD_109335  | metal      | metal     |
| O2S1Yb2.ICSD_23583   | metal      | metal     |
| O2S1.ICSD_24645      | insulator  | insulator |
| O2Sb1.ICSD_647389    | insulator  | insulator |
| O2Se1Yb2.ICSD_25811  | metal      | metal     |
| O2Se1.ICSD_412234    | insulator  | insulator |
| O2Se1.ICSD_72367     | insulator  | insulator |
| O2Se1.ICSD_99464     | insulator  | insulator |
| O2Se1.ICSD_99465     | insulator  | insulator |

Supplementary Table 546. Five-fold cross validated predictions for the metal/insulator classification (538/598).

| system            | calculated | predicted |
|-------------------|------------|-----------|
| O2Si1_ICSD_154321 | insulator  | insulator |
| O2Si1_ICSD_158532 | insulator  | insulator |
| O2Si1_ICSD_161310 | insulator  | insulator |
| O2Si1_ICSD_162616 | insulator  | insulator |
| O2Si1_ICSD_162621 | insulator  | insulator |
| O2Si1_ICSD_162625 | insulator  | insulator |
| O2Si1_ICSD_162626 | insulator  | insulator |
| O2Si1_ICSD_162660 | insulator  | insulator |
| O2Si1_ICSD_170476 | insulator  | insulator |
| O2Si1_ICSD_170481 | insulator  | insulator |
| O2Si1_ICSD_170486 | insulator  | insulator |
| O2Si1_ICSD_170489 | insulator  | insulator |
| O2Si1_ICSD_170490 | insulator  | insulator |
| O2Si1_ICSD_170492 | insulator  | insulator |
| O2Si1_ICSD_170496 | insulator  | insulator |
| O2Si1_ICSD_170497 | insulator  | insulator |
| O2Si1_ICSD_170498 | insulator  | insulator |
| O2Si1_ICSD_170500 | insulator  | insulator |
| O2Si1_ICSD_170501 | insulator  | metal     |
| O2Si1_ICSD_170502 | insulator  | insulator |
| O2Si1_ICSD_170503 | insulator  | insulator |
| O2Si1_ICSD_170504 | metal      | insulator |
| O2Si1_ICSD_170506 | metal      | insulator |
| O2Si1_ICSD_170507 | insulator  | insulator |
| O2Si1_ICSD_170508 | insulator  | insulator |
| O2Si1_ICSD_170510 | insulator  | insulator |
| O2Si1_ICSD_170512 | insulator  | insulator |
| O2Si1_ICSD_170513 | insulator  | insulator |
| O2Si1_ICSD_170514 | insulator  | insulator |
| O2Si1_ICSD_170515 | insulator  | insulator |
| O2Si1_ICSD_170518 | insulator  | insulator |
| O2Si1_ICSD_170523 | insulator  | insulator |
| O2Si1_ICSD_170524 | insulator  | insulator |
| O2Si1_ICSD_170527 | insulator  | insulator |
| O2Si1_ICSD_170530 | insulator  | insulator |
| O2Si1_ICSD_170531 | metal      | insulator |
| O2Si1_ICSD_170532 | insulator  | insulator |
| O2Si1_ICSD_170533 | insulator  | insulator |
| O2Si1_ICSD_170534 | insulator  | insulator |
| O2Si1_ICSD_170535 | insulator  | insulator |
| O2Si1_ICSD_170536 | insulator  | insulator |
| O2Si1_ICSD_170537 | insulator  | insulator |
| O2Si1_ICSD_170538 | metal      | insulator |
| O2Si1_ICSD_170539 | insulator  | insulator |
| O2Si1_ICSD_170542 | insulator  | insulator |
| O2Si1_ICSD_170543 | insulator  | insulator |
| O2Si1_ICSD_170545 | insulator  | insulator |
| O2Si1_ICSD_170546 | insulator  | insulator |
| O2Si1_ICSD_170547 | metal      | insulator |
| O2Si1_ICSD_170548 | insulator  | insulator |

Supplementary Table 547. Five-fold cross validated predictions for the metal/insulator classification (539/598).

| system            | calculated | predicted |
|-------------------|------------|-----------|
| O2Si1_ICSD_170549 | insulator  | insulator |
| O2Si1_ICSD_170550 | insulator  | insulator |
| O2Si1_ICSD_170551 | insulator  | insulator |
| O2Si1_ICSD_170552 | metal      | insulator |
| O2Si1_ICSD_170553 | insulator  | insulator |
| O2Si1_ICSD_170554 | insulator  | insulator |
| O2Si1_ICSD_171738 | insulator  | insulator |
| O2Si1_ICSD_171739 | insulator  | insulator |
| O2Si1_ICSD_172288 | insulator  | insulator |
| O2Si1_ICSD_181307 | insulator  | insulator |
| O2Si1_ICSD_183701 | insulator  | insulator |
| O2Si1_ICSD_200478 | insulator  | insulator |
| O2Si1_ICSD_25632  | metal      | insulator |
| O2Si1_ICSD_29343  | insulator  | insulator |
| O2Si1_ICSD_34889  | insulator  | insulator |
| O2Si1_ICSD_41447  | insulator  | insulator |
| O2Si1_ICSD_44271  | insulator  | insulator |
| O2Si1_ICSD_52371  | insulator  | insulator |
| O2Si1_ICSD_56473  | insulator  | insulator |
| O2Si1_ICSD_56608  | insulator  | insulator |
| O2Si1_ICSD_62581  | insulator  | insulator |
| O2Si1_ICSD_75300  | insulator  | insulator |
| O2Si1_ICSD_75647  | insulator  | insulator |
| O2Si1_ICSD_75649  | insulator  | insulator |
| O2Si1_ICSD_75651  | insulator  | insulator |
| O2Si1_ICSD_75652  | insulator  | insulator |
| O2Si1_ICSD_75654  | insulator  | insulator |
| O2Si1_ICSD_75659  | insulator  | insulator |
| O2Si1_ICSD_75662  | insulator  | insulator |
| O2Si1_ICSD_75664  | insulator  | insulator |
| O2Si1_ICSD_75665  | insulator  | insulator |
| O2Si1_ICSD_75668  | insulator  | insulator |
| O2Si1_ICSD_75669  | insulator  | insulator |
| O2Si1_ICSD_77458  | insulator  | insulator |
| O2Si1_ICSD_85586  | insulator  | insulator |
| O2Si1_ICSD_89289  | insulator  | insulator |
| O2Si1_ICSD_89661  | insulator  | insulator |
| O2Si1_ICSD_91736  | insulator  | insulator |
| O2Si1_ICSD_93975  | insulator  | insulator |
| O2Sn1_ICSD_157450 | insulator  | metal     |
| O2Sn1_ICSD_157451 | metal      | insulator |
| O2Sn1_ICSD_157452 | insulator  | insulator |
| O2Sn1_ICSD_157453 | metal      | metal     |
| O2Sn1_ICSD_181282 | metal      | insulator |
| O2Sn1_ICSD_39178  | metal      | insulator |
| O2Sn1_ICSD_56675  | insulator  | metal     |
| O2Sn1_ICSD_62199  | insulator  | insulator |
| O2Sr1_ICSD_647474 | insulator  | insulator |
| O2Ta1_ICSD_76024  | metal      | metal     |
| O2Tb1_ICSD_28846  | metal      | insulator |

Supplementary Table 548. Five-fold cross validated predictions for the metal/insulator classification (540/598).

| system              | calculated | predicted |
|---------------------|------------|-----------|
| O2Tb2Te1.ICSD_89564 | insulator  | insulator |
| O2Tc1.ICSD_173152   | metal      | insulator |
| O2Te1U2.ICSD_108986 | insulator  | metal     |
| O2Te1.ICSD_166846   | insulator  | insulator |
| O2Te1.ICSD_166847   | insulator  | insulator |
| O2Te1.ICSD_166848   | insulator  | insulator |
| O2Te1.ICSD_166849   | insulator  | insulator |
| O2Te1.ICSD_27515    | insulator  | insulator |
| O2Te1.ICSD_30222    | insulator  | insulator |
| O2Te1.ICSD_34423    | insulator  | insulator |
| O2Te1.ICSD_56004    | metal      | insulator |
| O2Te1.ICSD_655884   | insulator  | insulator |
| O2Th1.ICSD_246705   | insulator  | insulator |
| O2Th1.ICSD_647523   | insulator  | insulator |
| O2Ti1.ICSD_15328    | insulator  | insulator |
| O2Ti1.ICSD_154036   | insulator  | insulator |
| O2Ti1.ICSD_154609   | insulator  | insulator |
| O2Ti1.ICSD_167957   | insulator  | insulator |
| O2Ti1.ICSD_189323   | insulator  | insulator |
| O2Ti1.ICSD_189324   | insulator  | insulator |
| O2Ti1.ICSD_189325   | insulator  | insulator |
| O2Ti1.ICSD_36410    | insulator  | insulator |
| O2Ti1.ICSD_41056    | insulator  | insulator |
| O2Ti1.ICSD_41493    | insulator  | insulator |
| O2Ti1.ICSD_657748   | insulator  | insulator |
| O2Ti1.ICSD_93098    | insulator  | insulator |
| O2Ti1.ICSD_97008    | insulator  | insulator |
| O2U1.ICSD_160813    | metal      | metal     |
| O2U1.ICSD_160815    | metal      | metal     |
| O2U1.ICSD_647590    | metal      | metal     |
| O2V1.ICSD_1503      | insulator  | insulator |
| O2V1.ICSD_34033     | insulator  | insulator |
| O2V1.ICSD_34416     | metal      | insulator |
| O2V1.ICSD_34419     | insulator  | insulator |
| O2V1.ICSD_51213     | metal      | insulator |
| O2V1.ICSD_51214     | insulator  | insulator |
| O2V1.ICSD_57155     | insulator  | metal     |
| O2V1.ICSD_66665     | insulator  | insulator |
| O2V1.ICSD_77655     | insulator  | insulator |
| O2V1.ICSD_89470     | insulator  | insulator |
| O2W1.ICSD_647643    | metal      | metal     |
| O2W1.ICSD_647647    | metal      | metal     |
| O2W1.ICSD_74774     | insulator  | metal     |
| O2Zn1.ICSD_647668   | insulator  | insulator |
| O2Zr1.ICSD_164736   | insulator  | insulator |
| O2Zr1.ICSD_164861   | insulator  | insulator |
| O2Zr1.ICSD_173960   | insulator  | insulator |
| O2Zr1.ICSD_56696    | insulator  | insulator |
| O2Zr1.ICSD_67004    | insulator  | insulator |
| O2Zr1.ICSD_80047    | insulator  | insulator |

Supplementary Table 549. Five-fold cross validated predictions for the metal/insulator classification (541/598).

| system                 | calculated | predicted |
|------------------------|------------|-----------|
| O2Zr1.ICSD_92091       | metal      | insulator |
| O2.ICSD_164724         | metal      | insulator |
| O2.ICSD_173932         | insulator  | metal     |
| O2.ICSD_173934         | insulator  | insulator |
| O2.ICSD_37059          | metal      | metal     |
| O2.ICSD_43074          | metal      | insulator |
| O32P4W8.ICSD_32506     | metal      | insulator |
| O36P12Sc4.ICSD_1719    | insulator  | insulator |
| O38P4W10.ICSD_35262    | metal      | metal     |
| O3P4S6.ICSD_86494      | insulator  | insulator |
| O3Pb1Rb2.ICSD_1413     | insulator  | insulator |
| O3Pb1S1.ICSD_30993     | insulator  | insulator |
| O3Pb1S1.ICSD_35360     | insulator  | insulator |
| O3Pb1Se1.ICSD_22371    | insulator  | insulator |
| O3Pb1Se1.ICSD_94763    | insulator  | insulator |
| O3Pb1Sr1.ICSD_4121     | insulator  | insulator |
| O3Pb1Tc1.ICSD_109078   | metal      | metal     |
| O3Pb1Te1.ICSD_61343    | insulator  | insulator |
| O3Pb1Ti1.ICSD_182930   | insulator  | insulator |
| O3Pb1Ti1.ICSD_27949    | insulator  | insulator |
| O3Pb1Ti1.ICSD_51840    | insulator  | insulator |
| O3Pb1V1.ICSD_152277    | insulator  | insulator |
| O3Pb1V1.ICSD_187637    | metal      | metal     |
| O3Pb1Zr1.ICSD_262105   | insulator  | insulator |
| O3Pb1Zr1.ICSD_51574    | insulator  | insulator |
| O3Pb2.ICSD_23760       | insulator  | insulator |
| O3Pb2.ICSD_36243       | insulator  | insulator |
| O3Pd1Se1.ICSD_249504   | insulator  | insulator |
| O3Pd1Se1.ICSD_415955   | insulator  | insulator |
| O3Pd1Sr2.ICSD_95214    | insulator  | metal     |
| O3Pm2.ICSD_160224      | insulator  | insulator |
| O3Pm2.ICSD_647284      | metal      | insulator |
| O3Pm2.ICSD_96200       | metal      | insulator |
| O3Pr1Rh1.ICSD_172348   | insulator  | insulator |
| O3Pr1Ru1.ICSD_75570    | metal      | metal     |
| O3Pr1Sc1.ICSD_710019   | insulator  | insulator |
| O3Pr1V1.ICSD_28927     | metal      | metal     |
| O3Pr2.ICSD_154588      | insulator  | insulator |
| O3Pr2.ICSD_160222      | insulator  | insulator |
| O3Pr2.ICSD_184533      | insulator  | insulator |
| O3Pr2.ICSD_600743      | insulator  | insulator |
| O3Pu2.ICSD_109363      | metal      | metal     |
| O3Pu2.ICSD_647332      | metal      | metal     |
| O3Rb0.333W1.ICSD_96419 | metal      | metal     |
| O3Rb0.333W1.ICSD_96420 | metal      | metal     |
| O3Rb0.333W1.ICSD_96421 | metal      | metal     |
| O3Rb1Re1S1.ICSD_15088  | insulator  | insulator |
| O3Rb1Ta1.ICSD_1633     | insulator  | insulator |
| O3Rb1U1.ICSD_99548     | insulator  | insulator |
| O3Rb1V1.ICSD_1488      | insulator  | insulator |

Supplementary Table 550. Five-fold cross validated predictions for the metal/insulator classification (542/598).

| system               | calculated | predicted |
|----------------------|------------|-----------|
| O3Rb1_ICSD_59100     | insulator  | insulator |
| O3Rb2Sn2_ICSD_24816  | insulator  | insulator |
| O3Rb2Tb1_ICSD_1182   | metal      | insulator |
| O3Rb2Te1_ICSD_38223  | insulator  | insulator |
| O3Rb2Ti1_ICSD_6101   | insulator  | insulator |
| O3Re1_ICSD_202338    | metal      | metal     |
| O3Re1_ICSD_55465     | metal      | metal     |
| O3Re1_ICSD_647352    | metal      | metal     |
| O3Re1_ICSD_77680     | metal      | metal     |
| O3Rh1Sr1_ICSD_187483 | metal      | metal     |
| O3Rh1Tb1_ICSD_172352 | insulator  | insulator |
| O3Rh2_ICSD_181832    | metal      | insulator |
| O3Rh2_ICSD_647369    | insulator  | metal     |
| O3Rh2_ICSD_9206      | insulator  | metal     |
| O3Ru1Sr1_ICSD_180907 | metal      | metal     |
| O3Ru1Sr1_ICSD_180910 | metal      | metal     |
| O3Ru1Sr1_ICSD_50344  | metal      | metal     |
| O3Ru1Sr1_ICSD_82983  | metal      | metal     |
| O3S1_ICSD_24723      | insulator  | insulator |
| O3Sb1Ti1_ICSD_10142  | insulator  | insulator |
| O3Sb1Ti1_ICSD_4123   | insulator  | insulator |
| O3Sb1Ti1_ICSD_77329  | insulator  | insulator |
| O3Sb2_ICSD_105547    | insulator  | insulator |
| O3Sb2_ICSD_27595     | insulator  | insulator |
| O3Sc2_ICSD_160203    | insulator  | insulator |
| O3Sc2_ICSD_160218    | insulator  | insulator |
| O3Sc2_ICSD_27948     | insulator  | insulator |
| O3Se1Sr1_ICSD_240888 | insulator  | insulator |
| O3Se1Sr1_ICSD_419386 | insulator  | insulator |
| O3Se1Zn1_ICSD_163221 | insulator  | insulator |
| O3Se1Zn1_ICSD_29500  | insulator  | insulator |
| O3Si1Sr1_ICSD_59308  | insulator  | insulator |
| O3Si1Zn1_ICSD_158516 | insulator  | insulator |
| O3Si1Zn1_ICSD_158517 | insulator  | insulator |
| O3Si1Zn1_ICSD_167186 | insulator  | insulator |
| O3Sn1Sr1_ICSD_153532 | insulator  | insulator |
| O3Sn1Sr1_ICSD_161783 | insulator  | insulator |
| O3Sn1Sr1_ICSD_27047  | insulator  | insulator |
| O3Sn1Ta1_ICSD_27118  | metal      | insulator |
| O3Sn1Ti1_ICSD_186724 | insulator  | insulator |
| O3Sn1Ti2_ICSD_6325   | metal      | insulator |
| O3Sn1Zn1_ICSD_245943 | insulator  | insulator |
| O3Sn1Zn1_ICSD_50404  | insulator  | insulator |
| O3Sr1Tb1_ICSD_86734  | metal      | insulator |
| O3Sr1Tc1_ICSD_109076 | metal      | metal     |
| O3Sr1Tc1_ICSD_183451 | insulator  | insulator |
| O3Sr1Tc1_ICSD_183452 | insulator  | insulator |
| O3Sr1Ti1_ICSD_182247 | insulator  | insulator |
| O3Sr1Ti1_ICSD_80874  | insulator  | insulator |
| O3Sr1V1_ICSD_88982   | metal      | metal     |

Supplementary Table 551. Five-fold cross validated predictions for the metal/insulator classification (543/598).

| system                | calculated | predicted |
|-----------------------|------------|-----------|
| O3Sr1Zr1_ICSD_188453  | insulator  | insulator |
| O3Sr1Zr1_ICSD_290618  | insulator  | insulator |
| O3Sr1Zr1_ICSD_33666   | metal      | metal     |
| O3Sr1Zr1_ICSD_41083   | insulator  | insulator |
| O3Sr1Zr1_ICSD_89361   | insulator  | insulator |
| O3Ta2_ICSD_263120     | metal      | metal     |
| O3Tb2_ICSD_160212     | insulator  | insulator |
| O3Tb2_ICSD_184537     | insulator  | insulator |
| O3Tb2_ICSD_28172      | insulator  | insulator |
| O3Te1Zn1_ICSD_16937   | insulator  | insulator |
| O3Te1_ICSD_68372      | insulator  | insulator |
| O3Ti1Zn1_ICSD_22382   | insulator  | insulator |
| O3Ti2_ICSD_77696      | insulator  | insulator |
| O3Ti1V1_ICSD_6108     | insulator  | insulator |
| O3Ti2_ICSD_26813      | metal      | insulator |
| O3Ti4_ICSD_23478      | insulator  | insulator |
| O3Tm2_ICSD_160216     | insulator  | insulator |
| O3U1_ICSD_14366       | insulator  | insulator |
| O3U1_ICSD_26673       | insulator  | metal     |
| O3U1_ICSD_31628       | insulator  | insulator |
| O3V1Y1_ICSD_95578     | metal      | insulator |
| O3V2_ICSD_260212      | metal      | metal     |
| O3V2_ICSD_647629      | metal      | metal     |
| O3W1_ICSD_108651      | insulator  | metal     |
| O3W1_ICSD_188393      | insulator  | insulator |
| O3W1_ICSD_188394      | insulator  | insulator |
| O3W1_ICSD_32001       | insulator  | insulator |
| O3W1_ICSD_50732       | insulator  | insulator |
| O3W1_ICSD_654048      | insulator  | insulator |
| O3W1_ICSD_84848       | insulator  | insulator |
| O3W1_ICSD_86144       | insulator  | insulator |
| O3W1_ICSD_88366       | insulator  | insulator |
| O3W1_ICSD_89092       | insulator  | insulator |
| O3Xe1_ICSD_26627      | insulator  | insulator |
| O3Y2_ICSD_160219      | insulator  | insulator |
| O3Y2_ICSD_181827      | insulator  | insulator |
| O3Y2_ICSD_66730       | insulator  | insulator |
| O3Yb2_ICSD_420428     | insulator  | metal     |
| O3_ICSD_51500         | insulator  | insulator |
| O4Os1_ICSD_24672      | insulator  | insulator |
| O4Os1_ICSD_63         | insulator  | insulator |
| O4P1Pr1_ICSD_184551   | insulator  | insulator |
| O4P1Pr1_ICSD_62161    | insulator  | insulator |
| O4P1Rb1Zn1_ICSD_71778 | insulator  | insulator |
| O4P1Rb3_ICSD_161677   | insulator  | insulator |
| O4P1Sb1_ICSD_62977    | insulator  | insulator |
| O4P1Sc1_ICSD_16648    | insulator  | insulator |
| O4P1Tb1_ICSD_168752   | insulator  | insulator |
| O4P1Tb1_ICSD_168754   | insulator  | insulator |
| O4P1Tb1_ICSD_168755   | insulator  | insulator |

Supplementary Table 552. Five-fold cross validated predictions for the metal/insulator classification (544/598).

| system                 | calculated | predicted |
|------------------------|------------|-----------|
| O4P1Tb1.ICSD.168756    | insulator  | insulator |
| O4P1Tb1.ICSD.184561    | insulator  | insulator |
| O4P1Tb1.ICSD.79755     | insulator  | insulator |
| O4P1Ti1.ICSD.82282     | insulator  | insulator |
| O4P1Tl1Zn1.ICSD.74811  | insulator  | insulator |
| O4P1Tl1.ICSD.16619     | insulator  | insulator |
| O4P1Tl3.ICSD.23474     | insulator  | insulator |
| O4P1Tm1.ICSD.184548    | insulator  | insulator |
| O4P1V1.ICSD.36521      | insulator  | insulator |
| O4P1Y1.ICSD.79754      | insulator  | insulator |
| O4P1Yb1.ICSD.36054     | metal      | insulator |
| O4Pb1Pt2.ICSD.59657    | metal      | insulator |
| O4Pb1S1.ICSD.154273    | insulator  | insulator |
| O4Pb1Se1.ICSD.40921    | insulator  | insulator |
| O4Pb1Si1Zn1.ICSD.26840 | insulator  | insulator |
| O4Pb1Sr2.ICSD.16806    | insulator  | insulator |
| O4Pb1U1.ICSD.61344     | insulator  | insulator |
| O4Pb1W1.ICSD.155520    | insulator  | insulator |
| O4Pb1W1.ICSD.155522    | insulator  | insulator |
| O4Pb1W1.ICSD.16189     | insulator  | insulator |
| O4Pb1W1.ICSD.164726    | insulator  | insulator |
| O4Pb1W1.ICSD.811       | metal      | insulator |
| O4Pb2Pt1.ICSD.202214   | insulator  | insulator |
| O4Pb2Sn1.ICSD.31482    | insulator  | insulator |
| O4Pb3.ICSD.22325       | insulator  | insulator |
| O4Pb3.ICSD.647269      | insulator  | insulator |
| O4Pb3.ICSD.97282       | insulator  | insulator |
| O4Pd1S1.ICSD.79559     | insulator  | insulator |
| O4Pd1Se1.ICSD.416646   | insulator  | insulator |
| O4Pd1Zn2.ICSD.30076    | metal      | insulator |
| O4Pd2Pr1.ICSD.78843    | metal      | metal     |
| O4Pd2Y1.ICSD.78846     | metal      | insulator |
| O4Pd3Sr1.ICSD.16537    | metal      | metal     |
| O4Pd3Tl1.ICSD.2275     | insulator  | metal     |
| O4Pr1Sb1.ICSD.245046   | insulator  | insulator |
| O4Pr1Sr2.ICSD.90366    | insulator  | insulator |
| O4Pr1Ta1.ICSD.415428   | insulator  | insulator |
| O4Pr1V1.ICSD.78076     | insulator  | insulator |
| O4Pr2Si1Te1.ICSD.89579 | insulator  | insulator |
| O4Pt3.ICSD.27836       | metal      | metal     |
| O4Pt3.ICSD.30444       | metal      | metal     |
| O4Pu1Sr1.ICSD.31974    | metal      | insulator |
| O4Rb1Re1.ICSD.73297    | insulator  | insulator |
| O4Rb1Tc1.ICSD.423223   | insulator  | insulator |
| O4Rb2Ru1.ICSD.415748   | insulator  | insulator |
| O4Rb2U1.ICSD.20582     | insulator  | insulator |
| O4Rb2W1.ICSD.24905     | insulator  | insulator |
| O4Rb2Zn3.ICSD.40754    | insulator  | insulator |
| O4Rb4Sn1.ICSD.280293   | insulator  | insulator |
| O4Rh2Zn1.ICSD.647372   | insulator  | insulator |

Supplementary Table 553. Five-fold cross validated predictions for the metal/insulator classification (545/598).

| system               | calculated | predicted |
|----------------------|------------|-----------|
| O4Ru1Sr2.ICSD.75152  | metal      | metal     |
| O4Ru1.ICSD.415303    | insulator  | insulator |
| O4Ru1.ICSD.415306    | insulator  | insulator |
| O4S1Sn1.ICSD.245904  | insulator  | insulator |
| O4S1Sn1.ICSD.245905  | insulator  | insulator |
| O4S1Sn1.ICSD.245907  | insulator  | insulator |
| O4S1Sr1.ICSD.23744   | insulator  | insulator |
| O4S1Sr1.ICSD.85808   | insulator  | insulator |
| O4S1Tl2.ICSD.59944   | insulator  | insulator |
| O4S1Zn1.ICSD.2456    | insulator  | insulator |
| O4S1Zn1.ICSD.71018   | insulator  | insulator |
| O4Sb1Ta1.ICSD.25548  | insulator  | insulator |
| O4Sb1V1.ICSD.84567   | insulator  | insulator |
| O4Sb2Zn1.ICSD.41222  | insulator  | insulator |
| O4Sb2.ICSD.153154    | insulator  | insulator |
| O4Sb2.ICSD.24244     | insulator  | metal     |
| O4Sb2.ICSD.31103     | metal      | insulator |
| O4Sb2.ICSD.63272     | insulator  | insulator |
| O4Sc1V1.ICSD.164837  | insulator  | insulator |
| O4Se1Sr1.ICSD.40923  | metal      | insulator |
| O4Se1Sr1.ICSD.47004  | insulator  | insulator |
| O4Se1Tl2.ICSD.73411  | insulator  | insulator |
| O4Se1Tl2.ICSD.99384  | insulator  | insulator |
| O4Se1V1.ICSD.68333   | insulator  | insulator |
| O4Si1Sr2.ICSD.36041  | insulator  | insulator |
| O4Si1Th1.ICSD.15485  | insulator  | insulator |
| O4Si1Ti1.ICSD.166436 | insulator  | insulator |
| O4Si1Ti1.ICSD.166437 | insulator  | insulator |
| O4Si1Ti1.ICSD.166438 | insulator  | insulator |
| O4Si1U1.ICSD.15484   | insulator  | insulator |
| O4Si1Zn2.ICSD.167188 | insulator  | insulator |
| O4Si1Zn2.ICSD.167189 | insulator  | insulator |
| O4Si1Zn2.ICSD.167191 | insulator  | insulator |
| O4Si1Zn2.ICSD.167192 | insulator  | insulator |
| O4Si1Zn2.ICSD.167193 | insulator  | insulator |
| O4Si1Zn2.ICSD.187838 | insulator  | insulator |
| O4Si1Zn2.ICSD.2425   | insulator  | insulator |
| O4Si1Zr1.ICSD.186167 | insulator  | insulator |
| O4Si1Zr1.ICSD.186168 | insulator  | insulator |
| O4Si1Zr1.ICSD.187589 | insulator  | insulator |
| O4Sn1Sr2.ICSD.150388 | insulator  | insulator |
| O4Sn1Sr2.ICSD.59757  | insulator  | insulator |
| O4Sn1Sr2.ICSD.59758  | insulator  | insulator |
| O4Sn1Sr2.ICSD.81851  | insulator  | insulator |
| O4Sn1W1.ICSD.2147    | insulator  | insulator |
| O4Sn1W1.ICSD.2840    | insulator  | insulator |
| O4Sn1Zn2.ICSD.187039 | insulator  | insulator |
| O4Sn2Ti1.ICSD.163230 | insulator  | insulator |
| O4Sn3.ICSD.174299    | insulator  | insulator |
| O4Sr1Te1.ICSD.8098   | insulator  | insulator |

Supplementary Table 554. Five-fold cross validated predictions for the metal/insulator classification (546/598).

| system                | calculated | predicted |
|-----------------------|------------|-----------|
| O4Sr1Ti1V1.ICSD_36654 | insulator  | insulator |
| O4Sr1U1.ICSD_23196    | insulator  | insulator |
| O4Sr1U1.ICSD_31632    | insulator  | insulator |
| O4Sr1W1.ICSD_155745   | insulator  | insulator |
| O4Sr2Ti1.ICSD_157402  | insulator  | insulator |
| O4Sr2U1.ICSD_647477   | insulator  | insulator |
| O4Sr2V1.ICSD_71450    | metal      | metal     |
| O4Ta1Tb1.ICSD_415434  | insulator  | insulator |
| O4Ta1Tm1.ICSD_415459  | insulator  | insulator |
| O4Ta1Yb1.ICSD_415460  | insulator  | insulator |
| O4Tb1V1.ICSD_78078    | insulator  | insulator |
| O4Tb1V1.ICSD_88369    | insulator  | insulator |
| O4Te1V1.ICSD_9402     | insulator  | insulator |
| O4Ti1Zn2.ICSD_166486  | insulator  | insulator |
| O4Ti2W1.ICSD_8212     | insulator  | insulator |
| O4Tm1V1.ICSD_15602    | insulator  | insulator |
| O4Tm1V1.ICSD_78081    | insulator  | insulator |
| O4U1Y1.ICSD_16492     | metal      | insulator |
| O4V1Y1.ICSD_246709    | insulator  | insulator |
| O4V1Y1.ICSD_246710    | insulator  | insulator |
| O4V1Yb1.ICSD_9398     | metal      | metal     |
| O4V2Zn1.ICSD_55443    | metal      | metal     |
| O4W1Zn1.ICSD_156483   | insulator  | insulator |
| O4W1Zn1.ICSD_162238   | insulator  | insulator |
| O5P1Sb1.ICSD_201743   | insulator  | insulator |
| O5P1Sn1V1.ICSD_415445 | insulator  | insulator |
| O5P1Ta1.ICSD_202041   | insulator  | insulator |
| O5P1Ta1.ICSD_87281    | insulator  | insulator |
| O5P1V1.ICSD_108983    | insulator  | insulator |
| O5P1V1.ICSD_415924    | insulator  | insulator |
| O5P1V1.ICSD_425552    | insulator  | insulator |
| O5P1V1.ICSD_77598     | insulator  | insulator |
| O5P1V1.ICSD_9413      | insulator  | insulator |
| O5P1V2.ICSD_79681     | metal      | insulator |
| O5P1W1.ICSD_203048    | metal      | insulator |
| O5P2.ICSD_655005      | insulator  | insulator |
| O5P2.ICSD_77377       | metal      | insulator |
| O5P2.ICSD_79698       | insulator  | insulator |
| O5P2.ICSD_82688       | insulator  | metal     |
| O5Pb1Se2.ICSD_79688   | insulator  | insulator |
| O5Pb2S1.ICSD_14246    | insulator  | insulator |
| O5Pb2Te1.ICSD_407955  | insulator  | insulator |
| O5Pb2Te1.ICSD_425090  | insulator  | insulator |
| O5Pb2W1.ICSD_61399    | insulator  | insulator |
| O5Pb3Se1.ICSD_55076   | insulator  | insulator |
| O5S1Sn2.ICSD_35101    | insulator  | insulator |
| O5S1Ti1.ICSD_80627    | insulator  | insulator |
| O5S1Ti1.ICSD_81348    | insulator  | insulator |
| O5S1V1.ICSD_18307     | insulator  | insulator |
| O5S1V1.ICSD_80820     | insulator  | insulator |

Supplementary Table 555. Five-fold cross validated predictions for the metal/insulator classification (547/598).

| system                  | calculated | predicted |
|-------------------------|------------|-----------|
| O5Sb1U1.ICSD_72771      | insulator  | insulator |
| O5Sb2V1.ICSD_2292       | insulator  | insulator |
| O5Sb2.ICSD_31104        | metal      | insulator |
| O5Sb2.ICSD_8050         | insulator  | insulator |
| O5Se1U1.ICSD_1623       | insulator  | insulator |
| O5Se2Zn1.ICSD_2355      | insulator  | insulator |
| O5Se2.ICSD_10471        | insulator  | insulator |
| O5Si1Sr3.ICSD_18151     | insulator  | insulator |
| O5Si1Y2.ICSD_28021      | insulator  | insulator |
| O5Si1Y2.ICSD_51591      | insulator  | insulator |
| O5Si2Sr1.ICSD_171567    | insulator  | insulator |
| O5Sr2U1.ICSD_23199      | insulator  | insulator |
| O5Ta1V1.ICSD_261430     | insulator  | insulator |
| O5Ta2.ICSD_188462       | insulator  | insulator |
| O5Ta2.ICSD_280397       | insulator  | insulator |
| O5Ta2.ICSD_95462        | insulator  | insulator |
| O5Te1Ti1V1.ICSD_173863  | insulator  | insulator |
| O5Te1U1.ICSD_160677     | insulator  | insulator |
| O5Te1U1.ICSD_1624       | insulator  | insulator |
| O5Te2Ti2.ICSD_86782     | insulator  | insulator |
| O5Te2.ICSD_2523         | insulator  | insulator |
| O5Ti1Y2.ICSD_34692      | insulator  | insulator |
| O5Ti3.ICSD_20361        | insulator  | insulator |
| O5Ti3.ICSD_75193        | insulator  | insulator |
| O5Ti4.ICSD_77697        | metal      | insulator |
| O5Ti5.ICSD_56694        | metal      | metal     |
| O5U1V1.ICSD_66388       | insulator  | insulator |
| O5V2.ICSD_156051        | insulator  | insulator |
| O5V2.ICSD_156053        | insulator  | insulator |
| O5V2.ICSD_157988        | insulator  | insulator |
| O5V2.ICSD_80594         | insulator  | insulator |
| O5V2.ICSD_82152         | insulator  | insulator |
| O5V3.ICSD_15899         | metal      | insulator |
| O5V3.ICSD_16445         | insulator  | insulator |
| O6Os2Pb2.ICSD_23444     | metal      | metal     |
| O6Os2Rb1.ICSD_157439    | metal      | metal     |
| O6P2Pd1.ICSD_200677     | insulator  | insulator |
| O6P2Sr1.ICSD_280041     | insulator  | insulator |
| O6P2Zn1.ICSD_36040      | insulator  | insulator |
| O6P4S4.ICSD_27058       | insulator  | insulator |
| O6P4.ICSD_24407         | insulator  | insulator |
| O6Pb1Re2.ICSD_48205     | metal      | metal     |
| O6Pb1Sb2.ICSD_81387     | insulator  | insulator |
| O6Pb1Se2.ICSD_154718    | insulator  | insulator |
| O6Pb1V2.ICSD_36464      | insulator  | insulator |
| O6Pb1V2.ICSD_36465      | insulator  | insulator |
| O6Pb1V2.ICSD_6109       | insulator  | insulator |
| O6Pb2Re1Tc1.ICSD_188745 | metal      | metal     |
| O6Pb2Sc1Ta1.ICSD_77739  | insulator  | insulator |
| O6Pb2Sn2.ICSD_15308     | metal      | insulator |

Supplementary Table 556. Five-fold cross validated predictions for the metal/insulator classification (548/598).

| system                  | calculated | predicted |
|-------------------------|------------|-----------|
| O6Pb3S1_ICSD_30711      | insulator  | insulator |
| O6Pb3S1_ICSD_30712      | insulator  | insulator |
| O6Pb3S1_ICSD_61429      | insulator  | insulator |
| O6Pb3S1_ICSD_63639      | insulator  | insulator |
| O6Pd1Sr4_ICSD_88135     | insulator  | insulator |
| O6Pt1Sr3Zn1_ICSD_280519 | insulator  | insulator |
| O6Pt1Sr4_ICSD_89329     | insulator  | insulator |
| O6Pt3Zn1_ICSD_35339     | insulator  | insulator |
| O6Rb2S2_ICSD_27581      | insulator  | insulator |
| O6Rb4_ICSD_33961        | metal      | insulator |
| O6Rb6Ti2_ICSD_62643     | insulator  | insulator |
| O6Re1Sn2Tc1_ICSD_188744 | metal      | metal     |
| O6Re1Sr2Tb1_ICSD_25401  | metal      | metal     |
| O6Re1Sr2Tm1_ICSD_25406  | metal      | metal     |
| O6Re1Sr2Y1_ICSD_25404   | metal      | metal     |
| O6Re1Sr2Yb1_ICSD_25407  | metal      | metal     |
| O6Re1Sr2Zn1_ICSD_173489 | metal      | insulator |
| O6Re2Sb1_ICSD_51023     | metal      | metal     |
| O6Rh1Sc1Sr3_ICSD_51137  | insulator  | insulator |
| O6Rh1Sr3Tb1_ICSD_51054  | insulator  | insulator |
| O6Rh1Sr3Y1_ICSD_51136   | insulator  | insulator |
| O6Rh1Sr3Yb1_ICSD_51058  | insulator  | metal     |
| O6Rh1Sr3Zn1_ICSD_90285  | insulator  | insulator |
| O6Rh1Sr4_ICSD_109297    | metal      | insulator |
| O6Rh2U1_ICSD_23463      | insulator  | insulator |
| O6Ru1Sr2Y1_ICSD_49500   | insulator  | insulator |
| O6S1U1_ICSD_2579        | insulator  | insulator |
| O6Sb1Sr2Y1_ICSD_157887  | insulator  | insulator |
| O6Sb2Sr1_ICSD_74540     | insulator  | insulator |
| O6Sb2U1_ICSD_413442     | insulator  | insulator |
| O6Sb2W1_ICSD_75595      | insulator  | insulator |
| O6Sb2Zn1_ICSD_96612     | insulator  | insulator |
| O6Sb4_ICSD_36145        | insulator  | insulator |
| O6Sc2Te1_ICSD_417711    | insulator  | insulator |
| O6Se1U1_ICSD_2580       | insulator  | insulator |
| O6Se2Sn1_ICSD_154716    | insulator  | insulator |
| O6Se2Sn1_ICSD_154717    | insulator  | insulator |
| O6Se2Sr1Zn1_ICSD_280801 | insulator  | insulator |
| O6Se2Ti1_ICSD_200203    | insulator  | insulator |
| O6Sn1Ta2_ICSD_54078     | insulator  | insulator |
| O6Sr1Ta2_ICSD_39706     | insulator  | insulator |
| O6Sr2Ta1Y1_ICSD_247457  | insulator  | insulator |
| O6Sr2W1Zn1_ICSD_72811   | insulator  | insulator |
| O6Sr3U1_ICSD_23201      | insulator  | insulator |
| O6Ta2V1_ICSD_28490      | insulator  | insulator |
| O6Ta2Zn1_ICSD_36289     | insulator  | insulator |
| O6Te1Ti2_ICSD_4321      | metal      | insulator |
| O6Te1Ti6_ICSD_37135     | insulator  | insulator |
| O6Te1Y2_ICSD_240875     | insulator  | insulator |
| O6Te1Yb2_ICSD_62135     | metal      | metal     |

Supplementary Table 557. Five-fold cross validated predictions for the metal/insulator classification (549/598).

| system                | calculated | predicted |
|-----------------------|------------|-----------|
| O6Th1Ti2_ICSD_201890  | insulator  | insulator |
| O6Th1Ti2_ICSD_89068   | insulator  | insulator |
| O6Ti2U1_ICSD_201342   | insulator  | insulator |
| O6U1V2_ICSD_28086     | metal      | insulator |
| O6V14_ICSD_200243     | metal      | metal     |
| O6V2W1_ICSD_2575      | metal      | insulator |
| O6V2Zn1_ICSD_26998    | insulator  | insulator |
| O6V2Zn1_ICSD_30880    | insulator  | insulator |
| O6W1Y2_ICSD_20955     | insulator  | insulator |
| O6W1Y2_ICSD_65811     | insulator  | insulator |
| O6W1Yb2_ICSD_20956    | insulator  | insulator |
| O7Os1Tb3_ICSD_187410  | insulator  | insulator |
| O7P2Pd2_ICSD_166875   | insulator  | insulator |
| O7P2Rb1Ti1_ICSD_69848 | insulator  | insulator |
| O7P2Rb2Sr1_ICSD_39506 | insulator  | insulator |
| O7P2Si1_ICSD_14250    | insulator  | insulator |
| O7P2Si1_ICSD_19047    | insulator  | insulator |
| O7P2Si1_ICSD_75116    | insulator  | insulator |
| O7P2Sn1_ICSD_30583    | insulator  | insulator |
| O7P2Sr2_ICSD_16947    | insulator  | insulator |
| O7P2Sr2_ICSD_31004    | insulator  | insulator |
| O7P2Th1_ICSD_246234   | insulator  | insulator |
| O7P2Ti1_ICSD_189807   | insulator  | insulator |
| O7P2V1_ICSD_160942    | insulator  | insulator |
| O7P2V1_ICSD_200818    | insulator  | insulator |
| O7P2V1_ICSD_93022     | insulator  | insulator |
| O7P2W1_ICSD_90439     | insulator  | insulator |
| O7P2Zn2_ICSD_18315    | insulator  | insulator |
| O7P2Zn2_ICSD_24153    | insulator  | insulator |
| O7P2Zr1_ICSD_246397   | insulator  | insulator |
| O7P2Zr1_ICSD_280395   | insulator  | insulator |
| O7P4S1_ICSD_82358     | insulator  | insulator |
| O7P4Se1_ICSD_405209   | insulator  | insulator |
| O7Pb1Ti3_ICSD_2104    | insulator  | insulator |
| O7Pb2Sb2_ICSD_24246   | metal      | metal     |
| O7Pb2Sb2_ICSD_27120   | metal      | insulator |
| O7Pb2Sb2_ICSD_39274   | insulator  | insulator |
| O7Pb3Si2_ICSD_15371   | insulator  | insulator |
| O7Pr2Ru2_ICSD_163397  | metal      | insulator |
| O7Pr2Ru2_ICSD_78123   | insulator  | metal     |
| O7Pr2Sn2_ICSD_84744   | insulator  | insulator |
| O7Pr2Te2_ICSD_92444   | metal      | insulator |
| O7Pr2Zr2_ICSD_249972  | insulator  | insulator |
| O7Pr3Re1_ICSD_96410   | insulator  | insulator |
| O7Pr3Sb1_ICSD_78010   | insulator  | insulator |
| O7Pr3Ta1_ICSD_78008   | insulator  | insulator |
| O7Pt2Sb2_ICSD_108965  | metal      | insulator |
| O7Pt2Ti2_ICSD_22215   | insulator  | insulator |
| O7Rb2U2_ICSD_171465   | insulator  | insulator |
| O7Rb2W2_ICSD_300230   | insulator  | insulator |

Supplementary Table 558. Five-fold cross validated predictions for the metal/insulator classification (550/598).

| system                  | calculated | predicted |
|-------------------------|------------|-----------|
| O7Re1Tb3.ICSD_99253     | insulator  | insulator |
| O7Ru2Tb2.ICSD_82305     | insulator  | insulator |
| O7Ru2Ti2.ICSD_51158     | metal      | metal     |
| O7Ru2Y2.ICSD_73799      | insulator  | insulator |
| O7Ru2Yb2.ICSD_82306     | metal      | metal     |
| O7S1Te2.ICSD_90837      | insulator  | insulator |
| O7S3Si2Y4.ICSD_261248   | insulator  | insulator |
| O7Sb2Sr2.ICSD_62960     | insulator  | insulator |
| O7Sc2Si2.ICSD_1457      | insulator  | insulator |
| O7Sc2Si2.ICSD_26682     | insulator  | insulator |
| O7Sc2Sr1Tb2.ICSD_167053 | insulator  | insulator |
| O7Si2Sr1V1.ICSD_30451   | insulator  | insulator |
| O7Si2Sr2Zn1.ICSD_247476 | insulator  | insulator |
| O7Si2Ti6.ICSD_4230      | insulator  | insulator |
| O7Si2Y2.ICSD_164147     | insulator  | insulator |
| O7Si2Y2.ICSD_164148     | insulator  | insulator |
| O7Si2Y2.ICSD_281312     | insulator  | insulator |
| O7Si2Y2.ICSD_28212      | insulator  | insulator |
| O7Si2Y2.ICSD_416573     | insulator  | insulator |
| O7Si2Yb2.ICSD_16048     | insulator  | insulator |
| O7Si2Yb2.ICSD_28097     | insulator  | insulator |
| O7Sn1Ta2.ICSD_15206     | insulator  | insulator |
| O7Sn2Ta2.ICSD_27119     | insulator  | insulator |
| O7Sn2Tb2.ICSD_159787    | insulator  | insulator |
| O7Sn2Tm2.ICSD_82963     | insulator  | insulator |
| O7Sn2Y2.ICSD_160115     | insulator  | insulator |
| O7Sn2Yb2.ICSD_82964     | metal      | insulator |
| O7Sr1V3.ICSD_241183     | insulator  | insulator |
| O7Sr3V2.ICSD_71320      | insulator  | metal     |
| O7Sr3Zr2.ICSD_23731     | insulator  | insulator |
| O7Ta1Y3.ICSD_10059      | insulator  | insulator |
| O7Tb2Ti2.ICSD_159785    | insulator  | insulator |
| O7Te3Ti2.ICSD_150779    | insulator  | insulator |
| O7Ti2Y2.ICSD_66874      | insulator  | insulator |
| O7Ti2Yb2.ICSD_173750    | metal      | metal     |
| O7Ti4.ICSD_10148        | metal      | insulator |
| O7Ti4.ICSD_19016        | insulator  | insulator |
| O7Ti4.ICSD_6098         | insulator  | insulator |
| O7Ti4V2.ICSD_72810      | insulator  | insulator |
| O7V2Y2.ICSD_160600      | metal      | insulator |
| O7V2Y2.ICSD_160865      | insulator  | metal     |
| O7V2Yb2.ICSD_32689      | metal      | metal     |
| O7V2Zn2.ICSD_250002     | insulator  | insulator |
| O7V2Zn2.ICSD_2886       | insulator  | insulator |
| O7V4.ICSD_2211          | insulator  | insulator |
| O7V4.ICSD_653554        | metal      | insulator |
| O7Y2Zr2.ICSD_153818     | insulator  | insulator |
| O8P2Pb3.ICSD_14247      | insulator  | insulator |
| O8P2Pb3.ICSD_38011      | insulator  | insulator |
| O8P2Pb3.ICSD_8095       | insulator  | insulator |

Supplementary Table 559. Five-fold cross validated predictions for the metal/insulator classification (551/598).

| system                  | calculated | predicted |
|-------------------------|------------|-----------|
| O8P2Rb1Ta1.ICSD_54098   | insulator  | insulator |
| O8P2Sn1Sr1.ICSD_420128  | insulator  | insulator |
| O8P2Sr1Ti1.ICSD_420127  | insulator  | insulator |
| O8P2Sr1Zr1.ICSD_150336  | insulator  | insulator |
| O8P2Sr3.ICSD_150869     | insulator  | insulator |
| O8P2W1.ICSD_24067       | insulator  | insulator |
| O8P2Zn3.ICSD_27554      | insulator  | insulator |
| O8P2Zn3.ICSD_34303      | insulator  | insulator |
| O8P4.ICSD_406625        | insulator  | insulator |
| O8Pb2Te1U1.ICSD_380500  | insulator  | insulator |
| O8Pb3V2.ICSD_27651      | insulator  | insulator |
| O8Pb3V2.ICSD_29359      | insulator  | insulator |
| O8Pb3V2.ICSD_69799      | insulator  | insulator |
| O8Rb1S2Ti1.ICSD_21087   | insulator  | insulator |
| O8Rb1V3.ICSD_50009      | insulator  | insulator |
| O8Rb2V3.ICSD_79378      | insulator  | insulator |
| O8Rb3Ta1.ICSD_647346    | insulator  | insulator |
| O8Re2Zn1.ICSD_51017     | insulator  | insulator |
| O8S4Sn2.ICSD_32684      | insulator  | insulator |
| O8Se1Te3.ICSD_201784    | insulator  | insulator |
| O8Se2Sr1U1.ICSD_171869  | insulator  | insulator |
| O8Se2Te2.ICSD_201413    | insulator  | insulator |
| O8Si1Sn6.ICSD_156236    | insulator  | insulator |
| O8Si2Sr2Ti1.ICSD_290329 | insulator  | insulator |
| O8Sn1Te3.ICSD_9077      | insulator  | insulator |
| O8Sr1Te3.ICSD_416448    | insulator  | insulator |
| O8Sr3V2.ICSD_73258      | insulator  | insulator |
| O8Ta2U1.ICSD_27779      | insulator  | insulator |
| O8Ta2Zn3.ICSD_46001     | insulator  | insulator |
| O8Te2Ti2U1.ICSD_412560  | insulator  | insulator |
| O8Te3Ti1.ICSD_98902     | insulator  | insulator |
| O8Te3Zn2.ICSD_50705     | insulator  | insulator |
| O8Te3Zr1.ICSD_9079      | insulator  | insulator |
| O8Ti3Zn2.ICSD_83525     | insulator  | insulator |
| O8Ti1V3.ICSD_20688      | insulator  | insulator |
| O8U3.ICSD_28136         | metal      | metal     |
| O8U3.ICSD_28138         | metal      | metal     |
| O8U3.ICSD_36315         | metal      | insulator |
| O8U3.ICSD_38146         | metal      | metal     |
| O8V2Zn3.ICSD_23776      | insulator  | insulator |
| O8W2Zr1.ICSD_262061     | insulator  | insulator |
| O8W3.ICSD_73719         | metal      | insulator |
| O8.ICSD_156481          | insulator  | insulator |
| O9P2Si1V1.ICSD_628      | insulator  | insulator |
| O9P2Te2.ICSD_248226     | insulator  | insulator |
| O9P2Th2.ICSD_417156     | insulator  | insulator |
| O9P2U2.ICSD_402120      | insulator  | insulator |
| O9P2V1Zn2.ICSD_69768    | insulator  | insulator |
| O9P2Zr2.ICSD_1922       | insulator  | insulator |
| O9P2Zr2.ICSD_416014     | insulator  | insulator |

Supplementary Table 560. Five-fold cross validated predictions for the metal/insulator classification (552/598).

| system                  | calculated | predicted |
|-------------------------|------------|-----------|
| O9P3Pr1.ICSD.97950      | insulator  | insulator |
| O9P3Ru1.ICSD.80363      | insulator  | insulator |
| O9P3Sc1.ICSD.20430      | insulator  | insulator |
| O9P3V1.ICSD.20764       | insulator  | insulator |
| O9P3Y1.ICSD.421262      | insulator  | insulator |
| O9Pr1Ta3.ICSD.66285     | insulator  | insulator |
| O9Rb2Si3Sn1.ICSD.19028  | insulator  | insulator |
| O9Rb2Si3Ti1.ICSD.19026  | insulator  | insulator |
| O9Re2V1.ICSD.92317      | insulator  | insulator |
| O9S1Zr3.ICSD.68335      | insulator  | insulator |
| O9S2Sb2.ICSD.1948       | insulator  | insulator |
| O9S2U1.ICSD.423493      | insulator  | insulator |
| O9S2W1.ICSD.421958      | insulator  | insulator |
| O9S2Zn3.ICSD.15280      | insulator  | insulator |
| O9Sb3Ti2.ICSD.77330     | metal      | insulator |
| O9Sc2Se3.ICSD.98624     | insulator  | insulator |
| O9Sr1V4.ICSD.90926      | insulator  | insulator |
| O9Te2V2.ICSD.92255      | metal      | insulator |
| O9Te3U1.ICSD.9080       | insulator  | insulator |
| O9Te4.ICSD.1885         | insulator  | insulator |
| O9Ti3V2.ICSD.108830     | metal      | insulator |
| O9Ti4Ti2.ICSD.9239      | insulator  | insulator |
| O9Ti5.ICSD.653560       | insulator  | insulator |
| O9V4.ICSD.174441        | insulator  | insulator |
| O9V5.ICSD.6097          | insulator  | insulator |
| Os0.67W1.33.ICSD.647862 | metal      | metal     |
| Os1P1S1.ICSD.647714     | insulator  | insulator |
| Os1P1Se1.ICSD.647716    | insulator  | insulator |
| Os1P1Ti1.ICSD.647718    | metal      | metal     |
| Os1P1Zr1.ICSD.647719    | metal      | metal     |
| Os1P1Zr1.ICSD.647720    | metal      | metal     |
| Os1P2.ICSD.993          | insulator  | insulator |
| Os1P4.ICSD.647708       | insulator  | insulator |
| Os1S1Sb1.ICSD.647751    | insulator  | insulator |
| Os1S2.ICSD.300224       | insulator  | insulator |
| Os1Sb1Se1.ICSD.647759   | insulator  | insulator |
| Os1Sb1Te1.ICSD.647762   | insulator  | insulator |
| Os1Sb2.ICSD.647754      | insulator  | metal     |
| Os1Sc6Te2.ICSD.98972    | metal      | metal     |
| Os1Se2.ICSD.647769      | insulator  | insulator |
| Os1Si1Ti1.ICSD.647795   | metal      | metal     |
| Os1Si1Zr1.ICSD.647807   | metal      | metal     |
| Os1Si1.ICSD.15692       | insulator  | metal     |
| Os1Si1.ICSD.43417       | metal      | metal     |
| Os1Si2.ICSD.42730       | insulator  | insulator |
| Os1Si2.ICSD.647776      | metal      | insulator |
| Os1Si3Sm1.ICSD.647784   | metal      | metal     |
| Os1Si3Th1.ICSD.647791   | metal      | metal     |
| Os1Ta1Te4.ICSD.656454   | metal      | metal     |
| Os1Tb3.ICSD.647820      | metal      | metal     |

Supplementary Table 561. Five-fold cross validated predictions for the metal/insulator classification (553/598).

| system                 | calculated | predicted |
|------------------------|------------|-----------|
| Os1Te2.ICSD.647826     | metal      | metal     |
| Os1Ti1.ICSD.647842     | metal      | metal     |
| Os1V1.ICSD.150935      | metal      | metal     |
| Os1Y3.ICSD.647869      | metal      | metal     |
| Os1Zr1.ICSD.105580     | metal      | metal     |
| Os1.ICSD.186792        | metal      | metal     |
| Os1.ICSD.41523         | metal      | metal     |
| Os2P2Sr1.ICSD.602096   | metal      | metal     |
| Os2Pr1Si2.ICSD.647733  | metal      | metal     |
| Os2Pr1Si2.ICSD.99059   | metal      | metal     |
| Os2Pr1.ICSD.150519     | metal      | metal     |
| Os2Pr1.ICSD.647722     | metal      | metal     |
| Os2Pu1Si2.ICSD.73038   | metal      | metal     |
| Os2Pu1.ICSD.105559     | metal      | metal     |
| Os2Pu1.ICSD.647738     | metal      | metal     |
| Os2Sc1.ICSD.647766     | metal      | metal     |
| Os2Si2Sm1.ICSD.647786  | metal      | metal     |
| Os2Si2Tb1.ICSD.90339   | metal      | metal     |
| Os2Si2Th1.ICSD.603982  | metal      | metal     |
| Os2Si2U1.ICSD.604008   | metal      | metal     |
| Os2Si2Y1.ICSD.647804   | metal      | metal     |
| Os2Si2Yb1.ICSD.647806  | metal      | metal     |
| Os2Si3.ICSD.647782     | insulator  | insulator |
| Os2Si3.ICSD.95591      | insulator  | insulator |
| Os2Sm1.ICSD.150521     | metal      | metal     |
| Os2Tb1.ICSD.647822     | metal      | metal     |
| Os2Th1.ICSD.150741     | metal      | metal     |
| Os2U1.ICSD.657117      | metal      | metal     |
| Os2U1.ICSD.659012      | metal      | metal     |
| Os2Y1.ICSD.150518      | metal      | metal     |
| Os2Yb1.ICSD.647872     | metal      | metal     |
| Os2Zr1.ICSD.647878     | metal      | metal     |
| Os3Sn7.ICSD.105567     | metal      | metal     |
| Os3Th7.ICSD.150669     | metal      | metal     |
| Os3Ti1.ICSD.185638     | metal      | metal     |
| Os3Zr1.ICSD.185644     | metal      | metal     |
| Os4P12Pr1.ICSD.647712  | metal      | metal     |
| Os4Pr1Sb12.ICSD.155181 | metal      | metal     |
| Os4Pr1Sb12.ICSD.155186 | metal      | metal     |
| Os4Sb12Sr1.ICSD.658734 | metal      | metal     |
| Os4Sc11.ICSD.10439     | metal      | metal     |
| Os4Zr11.ICSD.647874    | metal      | metal     |
| Os7Sc44.ICSD.105565    | metal      | metal     |
| P12Pr1Ru4.ICSD.155822  | metal      | metal     |
| P12Ru4Tb1.ICSD.245294  | metal      | metal     |
| P12Ru4Th1.ICSD.648033  | metal      | metal     |
| P13Re6.ICSD.23357      | metal      | insulator |
| P14Sn1Zn1.ICSD.601339  | insulator  | insulator |
| P14Sr3.ICSD.42461      | metal      | insulator |
| P1Pb1Rb1S4.ICSD.249870 | insulator  | insulator |

Supplementary Table 562. Five-fold cross validated predictions for the metal/insulator classification (554/598).

| system                 | calculated | predicted |
|------------------------|------------|-----------|
| P1Pb1S4Tl1.ICSD_249170 | insulator  | insulator |
| P1Pd1Pr1.ICSD_57159    | metal      | metal     |
| P1Pd1S1.ICSD_2331      | insulator  | insulator |
| P1Pd1Se1.ICSD_77772    | insulator  | insulator |
| P1Pd1Sm1.ICSD_57160    | metal      | metal     |
| P1Pd3.ICSD_85525       | metal      | metal     |
| P1Pd5Sn1.ICSD_647931   | metal      | metal     |
| P1Pd5Tl1.ICSD_647937   | metal      | metal     |
| P1Pd5Zn1.ICSD_647941   | metal      | metal     |
| P1Pd6.ICSD_26898       | metal      | metal     |
| P1Pr1.ICSD_77773       | metal      | metal     |
| P1Pt1Sc1.ICSD_417911   | metal      | metal     |
| P1Pt1Sm1.ICSD_77776    | metal      | metal     |
| P1Pt1Tb1.ICSD_77777    | metal      | metal     |
| P1Pt1Tm1.ICSD_77778    | metal      | metal     |
| P1Pt1Y1.ICSD_77779     | metal      | metal     |
| P1Pt1Yb1.ICSD_44967    | metal      | metal     |
| P1Pt5Sn1.ICSD_647972   | metal      | metal     |
| P1Pt5Tl1.ICSD_647975   | metal      | metal     |
| P1Pt5Zn1.ICSD_647976   | metal      | metal     |
| P1Pu1.ICSD_77781       | metal      | metal     |
| P1Re2.ICSD_43564       | metal      | metal     |
| P1Re4Zr9.ICSD_647990   | metal      | metal     |
| P1Rh1Se1.ICSD_648002   | insulator  | insulator |
| P1Rh1Ta1.ICSD_648003   | metal      | metal     |
| P1Rh1Zr1.ICSD_648009   | insulator  | metal     |
| P1Rh2.ICSD_648000      | metal      | metal     |
| P1Ru1S1.ICSD_648023    | insulator  | insulator |
| P1Ru1Sc1.ICSD_77790    | metal      | metal     |
| P1Ru1Se1.ICSD_648028   | insulator  | insulator |
| P1Ru1Ta1.ICSD_648031   | metal      | metal     |
| P1Ru1Ti1.ICSD_77792    | metal      | metal     |
| P1Ru1Zr1.ICSD_648037   | metal      | metal     |
| P1Ru1Zr1.ICSD_648038   | metal      | metal     |
| P1Ru1.ICSD_648015      | metal      | metal     |
| P1Ru2.ICSD_43686       | metal      | metal     |
| P1S1Ta1.ICSD_648183    | metal      | metal     |
| P1S1Tb1.ICSD_648063    | insulator  | insulator |
| P1S1Th1.ICSD_154031    | metal      | metal     |
| P1S1Y1.ICSD_648080     | insulator  | insulator |
| P1S3Sn1.ICSD_657344    | insulator  | insulator |
| P1S3Zn1.ICSD_79557     | insulator  | insulator |
| P1S4Sc1.ICSD_67559     | insulator  | insulator |
| P1S4Sn1Tl1.ICSD_68294  | insulator  | insulator |
| P1S4Sr1Tl1.ICSD_249346 | insulator  | insulator |
| P1S4Ti3.ICSD_201062    | insulator  | insulator |
| P1S5Ti1Tl1.ICSD_171214 | insulator  | insulator |
| P1Sb1Ti2.ICSD_77796    | metal      | metal     |
| P1Sb1Zr2.ICSD_77797    | metal      | metal     |
| P1Sc1.ICSD_157504      | metal      | metal     |

Supplementary Table 563. Five-fold cross validated predictions for the metal/insulator classification (555/598).

| system               | calculated | predicted |
|----------------------|------------|-----------|
| P1Sc1.ICSD_180831    | metal      | metal     |
| P1Sc1.ICSD_188693    | insulator  | metal     |
| P1Sc3.ICSD_648101    | metal      | metal     |
| P1Se1Th1.ICSD_648115 | metal      | metal     |
| P1Se1U1.ICSD_42169   | metal      | metal     |
| P1Se3Sn1.ICSD_655564 | insulator  | insulator |
| P1Se4Ti3.ICSD_41703  | insulator  | insulator |
| P1Si1.ICSD_30334     | metal      | metal     |
| P1Sm1.ICSD_44127     | metal      | metal     |
| P1Sm1.ICSD_648152    | metal      | metal     |
| P1Sn1Sr1.ICSD_63594  | metal      | insulator |
| P1Sn1.ICSD_16077     | metal      | metal     |
| P1Sn1.ICSD_77786     | metal      | metal     |
| P1Sn3Zr5.ICSD_656295 | metal      | metal     |
| P1Sr1.ICSD_26262     | insulator  | insulator |
| P1Ta1.ICSD_108656    | metal      | metal     |
| P1Ta1.ICSD_648185    | metal      | metal     |
| P1Ta2.ICSD_43067     | metal      | metal     |
| P1Ta3.ICSD_10125     | metal      | metal     |
| P1Ta3.ICSD_648178    | metal      | metal     |
| P1Tb1.ICSD_648194    | metal      | metal     |
| P1Tc3.ICSD_35116     | metal      | metal     |
| P1Te1U1.ICSD_77846   | metal      | metal     |
| P1Te2Ti2.ICSD_418978 | metal      | metal     |
| P1Te2Zr2.ICSD_420650 | metal      | metal     |
| P1Th1.ICSD_648205    | metal      | metal     |
| P1Ti1.ICSD_76025     | metal      | metal     |
| P1Ti3.ICSD_43062     | metal      | metal     |
| P1Tl1.ICSD_184576    | metal      | metal     |
| P1Tm1.ICSD_77850     | metal      | metal     |
| P1U1.ICSD_648248     | metal      | metal     |
| P1U1.ICSD_77852      | metal      | metal     |
| P1V1Zr1.ICSD_39562   | metal      | metal     |
| P1V1.ICSD_648267     | metal      | metal     |
| P1V2.ICSD_648278     | metal      | metal     |
| P1W1.ICSD_648280     | metal      | metal     |
| P1W3.ICSD_648282     | metal      | metal     |
| P1Y1.ICSD_185495     | metal      | metal     |
| P1Y1.ICSD_77857      | metal      | metal     |
| P1Yb1.ICSD_656116    | metal      | metal     |
| P1Zr1.ICSD_77860     | metal      | metal     |
| P1Zr1.ICSD_77861     | metal      | metal     |
| P1Zr3.ICSD_43207     | metal      | metal     |
| P1.ICSD_150873       | insulator  | metal     |
| P1.ICSD_162244       | metal      | metal     |
| P1.ICSD_169539       | metal      | metal     |
| P1.ICSD_27847        | metal      | metal     |
| P1.ICSD_53301        | metal      | metal     |
| P1.ICSD_98122        | metal      | metal     |
| P2Pa1.ICSD_647903    | metal      | metal     |

Supplementary Table 564. Five-fold cross validated predictions for the metal/insulator classification (556/598).

| system                 | calculated | predicted |
|------------------------|------------|-----------|
| P2Pa1.ICSD.647905      | metal      | metal     |
| P2Pb2S6.ICSD.40756     | insulator  | insulator |
| P2Pb2S6.ICSD.647906    | insulator  | insulator |
| P2Pb2Se6.ICSD.40757    | metal      | insulator |
| P2Pb2Se6.ICSD.647911   | insulator  | insulator |
| P2Pb3S8.ICSD.36473     | insulator  | insulator |
| P2Pd15.ICSD.1096       | metal      | metal     |
| P2Pd2S6.ICSD.647926    | metal      | insulator |
| P2Pd2Sr1.ICSD.647932   | metal      | metal     |
| P2Pd3S8.ICSD.35361     | insulator  | insulator |
| P2Pr1Rh2.ICSD.647955   | metal      | metal     |
| P2Pr1Ru2.ICSD.602105   | metal      | metal     |
| P2Pt1Si3.ICSD.84944    | insulator  | insulator |
| P2Pt1.ICSD.647970      | insulator  | insulator |
| P2Pt5.ICSD.24327       | metal      | metal     |
| P2Rb1S7V1.ICSD.73782   | insulator  | insulator |
| P2Rb2S6.ICSD.416176    | insulator  | insulator |
| P2Rb2Se6.ICSD.173419   | insulator  | insulator |
| P2Rb3S8Sm1.ICSD.419350 | insulator  | insulator |
| P2Rh1.ICSD.174228      | insulator  | insulator |
| P2Rh2Sr1.ICSD.50186    | metal      | metal     |
| P2Rh3.ICSD.35626       | metal      | metal     |
| P2Ru1.ICSD.42737       | insulator  | insulator |
| P2Ru2Sm1.ICSD.602121   | metal      | metal     |
| P2Ru2Sr1.ICSD.648030   | metal      | metal     |
| P2Ru2Tb1.ICSD.602100   | metal      | metal     |
| P2Ru2Y1.ICSD.602128    | metal      | metal     |
| P2Ru2Yb1.ICSD.602104   | metal      | metal     |
| P2S6Sn2.ICSD.25357     | insulator  | insulator |
| P2S6Sn2.ICSD.39232     | insulator  | insulator |
| P2S6Sn2.ICSD.648056    | insulator  | insulator |
| P2S6Sr2.ICSD.405191    | insulator  | insulator |
| P2S6Th1.ICSD.35299     | insulator  | insulator |
| P2S6Ti1.ICSD.16403     | insulator  | insulator |
| P2S6Ti2.ICSD.38255     | insulator  | insulator |
| P2S6U1.ICSD.413318     | metal      | insulator |
| P2S6V2.ICSD.648076     | insulator  | insulator |
| P2S6Zr1.ICSD.50700     | insulator  | insulator |
| P2S7Zr1.ICSD.50701     | insulator  | insulator |
| P2S7.ICSD.423061       | insulator  | insulator |
| P2S7.ICSD.423062       | insulator  | insulator |
| P2S8Zn3.ICSD.95784     | insulator  | insulator |
| P2Sc3.ICSD.41679       | metal      | metal     |
| P2Se5.ICSD.74546       | insulator  | insulator |
| P2Se6Sn2.ICSD.403097   | insulator  | insulator |
| P2Se6Sr2.ICSD.412766   | metal      | insulator |
| P2Si1Zn1.ICSD.648145   | insulator  | insulator |
| P2Si1.ICSD.24333       | metal      | insulator |
| P2Si1.ICSD.43098       | insulator  | insulator |
| P2Sn1Zn1.ICSD.77803    | insulator  | insulator |

Supplementary Table 565. Five-fold cross validated predictions for the metal/insulator classification (557/598).

| system               | calculated | predicted |
|----------------------|------------|-----------|
| P2Sr1Zn2.ICSD.30911  | insulator  | insulator |
| P2Ta1.ICSD.648187    | metal      | metal     |
| P2Th1.ICSD.648206    | metal      | metal     |
| P2Ti1.ICSD.24351     | metal      | metal     |
| P2U1.ICSD.76255      | metal      | metal     |
| P2U1.ICSD.87138      | metal      | metal     |
| P2V1.ICSD.648276     | metal      | metal     |
| P2W1.ICSD.37223      | metal      | metal     |
| P2W1.ICSD.648286     | metal      | metal     |
| P2Yb1Zn2.ICSD.648298 | insulator  | insulator |
| P2Zn1.ICSD.18137     | insulator  | insulator |
| P2Zn1.ICSD.250014    | insulator  | insulator |
| P2Zn1.ICSD.43334     | metal      | insulator |
| P2Zn1.ICSD.648308    | insulator  | insulator |
| P2Zn3.ICSD.24487     | metal      | metal     |
| P2Zn3.ICSD.648299    | insulator  | insulator |
| P2Zn3.ICSD.648310    | insulator  | insulator |
| P2Zr1.ICSD.24352     | metal      | metal     |
| P3Pd1.ICSD.647923    | metal      | metal     |
| P3Pd3Sr2.ICSD.36631  | metal      | metal     |
| P3Pd7.ICSD.200055    | metal      | metal     |
| P3Pr1Zn3.ICSD.88675  | metal      | metal     |
| P3Rb1Zn4.ICSD.262039 | insulator  | insulator |
| P3Rb2.ICSD.654296    | insulator  | insulator |
| P3Re1.ICSD.647985    | insulator  | insulator |
| P3Rh1.ICSD.23712     | metal      | metal     |
| P3Rh4.ICSD.43704     | metal      | metal     |
| P3Ru1.ICSD.62420     | insulator  | insulator |
| P3Sc7.ICSD.648099    | metal      | metal     |
| P3Sm1Zn3.ICSD.81030  | metal      | metal     |
| P3Sn1.ICSD.16293     | metal      | metal     |
| P3Sn4.ICSD.15014     | metal      | metal     |
| P3Sr1.ICSD.23628     | insulator  | insulator |
| P3Sr1.ICSD.96543     | metal      | metal     |
| P3Tc1.ICSD.35200     | insulator  | insulator |
| P3Tc2.ICSD.41016     | metal      | metal     |
| P3Tc2.ICSD.41017     | metal      | metal     |
| P3Ti4.ICSD.648219    | metal      | metal     |
| P3Ti5.ICSD.77848     | metal      | metal     |
| P3V4.ICSD.648275     | metal      | metal     |
| P3V5.ICSD.648274     | metal      | metal     |
| P4Pa3.ICSD.647904    | metal      | metal     |
| P4Pd7Tb3.ICSD.409874 | metal      | metal     |
| P4Re1.ICSD.8197      | insulator  | insulator |
| P4Re3.ICSD.48124     | metal      | metal     |
| P4Rh6Sc1.ICSD.182778 | metal      | metal     |
| P4Rh6Yb1.ICSD.182779 | metal      | metal     |
| P4Ru1Si4.ICSD.79006  | insulator  | insulator |
| P4Ru1.ICSD.2492      | insulator  | insulator |
| P4Ru1.ICSD.648018    | insulator  | insulator |

Supplementary Table 566. Five-fold cross validated predictions for the metal/insulator classification (558/598).

| system                 | calculated | predicted |
|------------------------|------------|-----------|
| P4S10.ICSD.174009      | insulator  | insulator |
| P4S13V2.ICSD.201569    | insulator  | insulator |
| P4S3.ICSD.417155       | insulator  | insulator |
| P4S4.ICSD.1703         | insulator  | insulator |
| P4S5.ICSD.16681        | insulator  | insulator |
| P4S5.ICSD.1995         | insulator  | insulator |
| P4S6.ICSD.423037       | insulator  | insulator |
| P4Se3.ICSD.40204       | insulator  | insulator |
| P4Se4.ICSD.74878       | insulator  | insulator |
| P4Se5.ICSD.16140       | insulator  | insulator |
| P4Sr3.ICSD.38321       | insulator  | insulator |
| P4Sr4Ti1.ICSD.380112   | insulator  | insulator |
| P4Tc1.ICSD.35117       | insulator  | insulator |
| P4Th3.ICSD.25724       | metal      | metal     |
| P4Ti7.ICSD.648209      | metal      | metal     |
| P4U3.ICSD.648243       | metal      | metal     |
| P4V1.ICSD.38315        | metal      | metal     |
| P4Zn1.ICSD.40428       | insulator  | insulator |
| P4Zr7.ICSD.40281       | metal      | metal     |
| P4.ICSD.154318         | insulator  | insulator |
| P4.ICSD.68326          | insulator  | insulator |
| P5Pr1.ICSD.409182      | metal      | metal     |
| P5Re2.ICSD.24808       | insulator  | metal     |
| P5Sm1.ICSD.409183      | metal      | metal     |
| P5Tl1.ICSD.15021       | insulator  | insulator |
| P5Tm1.ICSD.409186      | metal      | metal     |
| P5Y1.ICSD.409188       | insulator  | metal     |
| P5Yb1.ICSD.409179      | metal      | metal     |
| P5Yb1.ICSD.409180      | insulator  | metal     |
| P6Pt4Sr1.ICSD.62517    | insulator  | insulator |
| P6S18Zn4.ICSD.1434     | insulator  | insulator |
| P6Sn2Sr5.ICSD.63593    | insulator  | insulator |
| P7Ru12Sc2.ICSD.77791   | metal      | metal     |
| P9Zr14.ICSD.31785      | metal      | metal     |
| Pa1Pt3.ICSD.648336     | metal      | metal     |
| Pa1Pt5.ICSD.648334     | metal      | metal     |
| Pa1Rh3.ICSD.105586     | metal      | metal     |
| Pa1Sb2.ICSD.648339     | metal      | metal     |
| Pa1.ICSD.648331        | metal      | metal     |
| Pa1.ICSD.649179        | metal      | metal     |
| Pa3Sb4.ICSD.601258     | metal      | metal     |
| Pb0.33S2Ta1.ICSD.74693 | metal      | metal     |
| Pb13Pr3Rh4.ICSD.648389 | metal      | metal     |
| Pb13Rh4Sr3.ICSD.105610 | metal      | metal     |
| Pb1Pd1Pr1.ICSD.657942  | metal      | metal     |
| Pb1Pd1Y1.ICSD.54315    | metal      | metal     |
| Pb1Pd1Yb1.ICSD.657947  | metal      | metal     |
| Pb1Pd2Sm2.ICSD.99193   | metal      | metal     |
| Pb1Pd2Tb2.ICSD.99195   | metal      | metal     |
| Pb1Pd2Tm2.ICSD.99199   | metal      | metal     |

Supplementary Table 567. Five-fold cross validated predictions for the metal/insulator classification (559/598).

| system                | calculated | predicted |
|-----------------------|------------|-----------|
| Pb1Pd2Y1.ICSD.105597  | metal      | metal     |
| Pb1Pd2Y2.ICSD.99189   | metal      | metal     |
| Pb1Pd3.ICSD.648358    | metal      | metal     |
| Pb1Pr3.ICSD.648387    | metal      | metal     |
| Pb1Pt1.ICSD.105602    | metal      | metal     |
| Pb1Pt1.ICSD.648398    | metal      | metal     |
| Pb1Pt3.ICSD.648399    | metal      | metal     |
| Pb1Pt5Si1.ICSD.648402 | metal      | metal     |
| Pb1Pu3.ICSD.157519    | metal      | metal     |
| Pb1Rh1.ICSD.648421    | metal      | metal     |
| Pb1S1.ICSD.183240     | insulator  | insulator |
| Pb1S1.ICSD.183241     | insulator  | insulator |
| Pb1S1.ICSD.183243     | insulator  | insulator |
| Pb1S1.ICSD.183244     | metal      | insulator |
| Pb1S1.ICSD.183245     | metal      | metal     |
| Pb1S1.ICSD.183248     | insulator  | insulator |
| Pb1S1.ICSD.183251     | insulator  | insulator |
| Pb1S1.ICSD.183254     | insulator  | insulator |
| Pb1S1.ICSD.183255     | insulator  | metal     |
| Pb1S1.ICSD.648435     | insulator  | insulator |
| Pb1S1.ICSD.648438     | insulator  | insulator |
| Pb1S1.ICSD.68712      | insulator  | insulator |
| Pb1S1.ICSD.68969      | insulator  | insulator |
| Pb1S1.ICSD.77865      | metal      | metal     |
| Pb1S2Ta1.ICSD.648482  | metal      | metal     |
| Pb1S3Sn1.ICSD.23462   | insulator  | insulator |
| Pb1S3Zr1.ICSD.2439    | metal      | insulator |
| Pb1S4Sc2.ICSD.154527  | insulator  | insulator |
| Pb1Sb2Te4.ICSD.250250 | insulator  | insulator |
| Pb1Sc2Se4.ICSD.154528 | insulator  | insulator |
| Pb1Se1.ICSD.648514    | insulator  | insulator |
| Pb1Se1.ICSD.648522    | insulator  | metal     |
| Pb1Se1.ICSD.77870     | metal      | metal     |
| Pb1Se2Ta1.ICSD.648539 | metal      | metal     |
| Pb1Se2.ICSD.174577    | metal      | insulator |
| Pb1Se3Ti4.ICSD.261016 | insulator  | insulator |
| Pb1Se3Ti4.ICSD.648545 | metal      | metal     |
| Pb1Sr1Zn1.ICSD.54319  | metal      | metal     |
| Pb1Sr1.ICSD.105623    | metal      | metal     |
| Pb1Sr2.ICSD.105624    | metal      | insulator |
| Pb1Te1.ICSD.648582    | insulator  | metal     |
| Pb1Te1.ICSD.648606    | insulator  | metal     |
| Pb1Te1.ICSD.77882     | metal      | metal     |
| Pb1Te3Ti4.ICSD.648620 | metal      | metal     |
| Pb1Th1.ICSD.105631    | metal      | metal     |
| Pb1U1.ICSD.105636     | metal      | metal     |
| Pb1V3.ICSD.105639     | metal      | metal     |
| Pb1Yb1Zn1.ICSD.648669 | metal      | metal     |
| Pb1Yb1.ICSD.648664    | metal      | metal     |
| Pb1Yb2.ICSD.105645    | metal      | metal     |

Supplementary Table 568. Five-fold cross validated predictions for the metal/insulator classification (560/598).

| system                  | calculated | predicted |
|-------------------------|------------|-----------|
| Pb1_ICSD_54314          | metal      | metal     |
| Pb1_ICSD_77864          | metal      | metal     |
| Pb1_ICSD_96501          | metal      | metal     |
| Pb2Pd1_ICSD_105590      | metal      | metal     |
| Pb2Pd3S2_ICSD_159361    | metal      | metal     |
| Pb2Pd3S2_ICSD_159365    | metal      | metal     |
| Pb2Pd3Se2_ICSD_648366   | metal      | metal     |
| Pb2Pd3Te2_ICSD_163134   | metal      | metal     |
| Pb2Pt1_ICSD_54316       | metal      | metal     |
| Pb2Rh1_ICSD_105608      | metal      | metal     |
| Pb2Rh3S2_ICSD_420727    | metal      | metal     |
| Pb2Rh3Se2_ICSD_648427   | metal      | metal     |
| Pb2S4Si1_ICSD_16317     | insulator  | insulator |
| Pb2S5Sb2_ICSD_35640     | insulator  | insulator |
| Pb2Se4Si1_ICSD_16318    | insulator  | insulator |
| Pb2Y1_ICSD_105640       | metal      | metal     |
| Pb3Pd5_ICSD_648361      | metal      | metal     |
| Pb3Pr1_ICSD_105600      | metal      | metal     |
| Pb3Pr1_ICSD_648380      | metal      | metal     |
| Pb3S12Sn3Y2_ICSD_159889 | insulator  | insulator |
| Pb3S15Sb8_ICSD_41849    | insulator  | insulator |
| Pb3Sc5_ICSD_105614      | metal      | metal     |
| Pb3Sr1_ICSD_105625      | metal      | metal     |
| Pb3Sr2_ICSD_648570      | metal      | metal     |
| Pb3Tb1_ICSD_105629      | metal      | metal     |
| Pb3Tb5_ICSD_648576      | metal      | metal     |
| Pb3Th1_ICSD_648629      | metal      | metal     |
| Pb3Th5_ICSD_648630      | metal      | metal     |
| Pb3Tm1_ICSD_105635      | metal      | metal     |
| Pb3U1_ICSD_648650       | metal      | metal     |
| Pb3Y1_ICSD_648658       | metal      | metal     |
| Pb3Y5_ICSD_648656       | metal      | metal     |
| Pb3Yb1_ICSD_105647      | metal      | metal     |
| Pb3Yb5_ICSD_105648      | metal      | metal     |
| Pb3Zr5_ICSD_648672      | metal      | metal     |
| Pb4Pt1_ICSD_648397      | metal      | metal     |
| Pb4S11Sb4_ICSD_200601   | metal      | insulator |
| Pb5Rh4_ICSD_105609      | metal      | metal     |
| Pb5Sc6_ICSD_170063      | metal      | metal     |
| Pd10Te3_ICSD_77903      | metal      | metal     |
| Pd13Te3_ICSD_172382     | metal      | metal     |
| Pd13Ti9_ICSD_105731     | metal      | metal     |
| Pd16S7_ICSD_32053       | metal      | metal     |
| Pd17Se15_ICSD_108785    | metal      | metal     |
| Pd17Te4_ICSD_649007     | metal      | metal     |
| Pd1Pr1Sb1_ICSD_648694   | metal      | metal     |
| Pd1Pr1Sb2_ICSD_93154    | metal      | metal     |
| Pd1Pr1Sn1_ICSD_419193   | metal      | metal     |
| Pd1Pr1Sn1_ICSD_54459    | metal      | metal     |
| Pd1Pr1Zn1_ICSD_54325    | metal      | metal     |

Supplementary Table 569. Five-fold cross validated predictions for the metal/insulator classification (561/598).

| system                 | calculated | predicted |
|------------------------|------------|-----------|
| Pd1Pr1_ICSD_648691     | metal      | metal     |
| Pd1Pr1_ICSD_656730     | metal      | metal     |
| Pd1Pu1_ICSD_105658     | metal      | metal     |
| Pd1Rb2Se16_ICSD_410443 | insulator  | insulator |
| Pd1Rb2Se2_ICSD_648724  | insulator  | insulator |
| Pd1Rb2Te2_ICSD_648727  | insulator  | insulator |
| Pd1S1Sb1_ICSD_648757   | metal      | metal     |
| Pd1S1_ICSD_648756      | insulator  | metal     |
| Pd1S2_ICSD_648753      | insulator  | insulator |
| Pd1S4U2_ICSD_63590     | insulator  | metal     |
| Pd1S6Ta2_ICSD_655261   | metal      | metal     |
| Pd1Sb1Sc1_ICSD_415944  | insulator  | metal     |
| Pd1Sb1Se1_ICSD_648784  | metal      | metal     |
| Pd1Sb1Sm1_ICSD_648787  | metal      | metal     |
| Pd1Sb1Tb1_ICSD_648792  | metal      | metal     |
| Pd1Sb1Te1_ICSD_93906   | metal      | metal     |
| Pd1Sb1Tm1_ICSD_54328   | metal      | metal     |
| Pd1Sb1U1_ICSD_648798   | metal      | metal     |
| Pd1Sb1Yb1_ICSD_391182  | metal      | metal     |
| Pd1Sb1Yb1_ICSD_391183  | metal      | metal     |
| Pd1Sb1Yb1_ICSD_648804  | metal      | metal     |
| Pd1Sb1Zr1_ICSD_92441   | metal      | metal     |
| Pd1Sb1_ICSD_42598      | metal      | metal     |
| Pd1Sb2Sm1_ICSD_658221  | metal      | metal     |
| Pd1Sb2Tb1_ICSD_658223  | metal      | metal     |
| Pd1Sb2U1_ICSD_50349    | metal      | metal     |
| Pd1Sb2_ICSD_648773     | metal      | metal     |
| Pd1Sc1Si1_ICSD_648814  | metal      | metal     |
| Pd1Sc1Sn1_ICSD_648815  | metal      | metal     |
| Pd1Sc1Zn1_ICSD_424601  | metal      | metal     |
| Pd1Sc1_ICSD_648811     | metal      | metal     |
| Pd1Sc2_ICSD_648813     | metal      | metal     |
| Pd1Se1_ICSD_409568     | insulator  | metal     |
| Pd1Se1_ICSD_648823     | metal      | insulator |
| Pd1Se2Ti2_ICSD_79601   | metal      | metal     |
| Pd1Se2_ICSD_16693      | insulator  | metal     |
| Pd1Se6Ta2_ICSD_600717  | metal      | metal     |
| Pd1Si1Sr1_ICSD_69791   | metal      | metal     |
| Pd1Si1Ti1_ICSD_648877  | metal      | metal     |
| Pd1Si1U1_ICSD_86952    | metal      | metal     |
| Pd1Si1Y1_ICSD_408080   | metal      | metal     |
| Pd1Si1Zr1_ICSD_648895  | metal      | metal     |
| Pd1Si1_ICSD_659957     | metal      | metal     |
| Pd1Sm1Sn1_ICSD_648908  | metal      | metal     |
| Pd1Sm1Zn1_ICSD_656590  | metal      | metal     |
| Pd1Sm1_ICSD_648907     | metal      | metal     |
| Pd1Sn1Tb1_ICSD_648933  | metal      | metal     |
| Pd1Sn1Te1_ICSD_162404  | metal      | metal     |
| Pd1Sn1U1_ICSD_54332    | metal      | metal     |
| Pd1Sn1U1_ICSD_54384    | metal      | metal     |

Supplementary Table 570. Five-fold cross validated predictions for the metal/insulator classification (562/598).

| system                | calculated | predicted |
|-----------------------|------------|-----------|
| Pd1Sn1U1.ICSD.648945  | metal      | metal     |
| Pd1Sn1Y1.ICSD.424012  | metal      | metal     |
| Pd1Sn1Yb1.ICSD.151166 | metal      | metal     |
| Pd1Sn1Yb1.ICSD.151167 | metal      | metal     |
| Pd1Sn1Zr1.ICSD.105705 | insulator  | insulator |
| Pd1Sn1.ICSD.105683    | metal      | metal     |
| Pd1Sn1.ICSD.648928    | metal      | metal     |
| Pd1Sn2Yb1.ICSD.411798 | metal      | metal     |
| Pd1Sn3Sr1.ICSD.105692 | metal      | metal     |
| Pd1Sn3.ICSD.105685    | metal      | metal     |
| Pd1Sn4.ICSD.105686    | metal      | metal     |
| Pd1Sr1Ti2.ICSD.165577 | metal      | metal     |
| Pd1Sr1.ICSD.648963    | metal      | metal     |
| Pd1Ta1.ICSD.648973    | metal      | metal     |
| Pd1Tb1Ti1.ICSD.105713 | metal      | metal     |
| Pd1Tb1Zn1.ICSD.183340 | metal      | metal     |
| Pd1Tb1.ICSD.648983    | metal      | metal     |
| Pd1Tb1.ICSD.648985    | metal      | metal     |
| Pd1Te1.ICSD.659960    | metal      | metal     |
| Pd1Te2.ICSD.41387     | metal      | metal     |
| Pd1Th1.ICSD.105716    | metal      | metal     |
| Pd1Th2.ICSD.102813    | metal      | metal     |
| Pd1Ti1.ICSD.167647    | metal      | metal     |
| Pd1Ti1.ICSD.167649    | metal      | metal     |
| Pd1Ti1.ICSD.184673    | metal      | metal     |
| Pd1Ti1.ICSD.649035    | metal      | metal     |
| Pd1Ti2.ICSD.105722    | metal      | metal     |
| Pd1Ti3.ICSD.167644    | metal      | metal     |
| Pd1Ti1Y1.ICSD.105732  | metal      | metal     |
| Pd1Ti1Yb1.ICSD.105733 | metal      | metal     |
| Pd1Ti2.ICSD.102796    | metal      | metal     |
| Pd1Tm1.ICSD.105734    | metal      | metal     |
| Pd1Tm1.ICSD.649076    | metal      | metal     |
| Pd1V3.ICSD.649092     | metal      | metal     |
| Pd1Y1Zn1.ICSD.183333  | metal      | metal     |
| Pd1Y1Zn1.ICSD.183334  | metal      | metal     |
| Pd1Y1.ICSD.169021     | metal      | metal     |
| Pd1Y3.ICSD.649111     | metal      | metal     |
| Pd1Yb1Zn1.ICSD.159304 | metal      | metal     |
| Pd1Yb1.ICSD.105748    | metal      | metal     |
| Pd1Yb1.ICSD.649124    | insulator  | metal     |
| Pd1Yb3.ICSD.649132    | metal      | metal     |
| Pd1Zn1.ICSD.649135    | metal      | metal     |
| Pd1Zr1.ICSD.186410    | metal      | metal     |
| Pd1Zr1.ICSD.55546     | metal      | metal     |
| Pd1Zr2.ICSD.105758    | metal      | metal     |
| Pd1.ICSD.64918        | metal      | metal     |
| Pd20Sb7.ICSD.648771   | metal      | metal     |
| Pd20Si6U3.ICSD.93930  | metal      | metal     |
| Pd20Te7.ICSD.42551    | metal      | metal     |

Supplementary Table 571. Five-fold cross validated predictions for the metal/insulator classification (563/598).

| system                  | calculated | predicted |
|-------------------------|------------|-----------|
| Pd2Pr1Si2.ICSD.601261   | metal      | metal     |
| Pd2Pr1Si2.ICSD.648697   | metal      | metal     |
| Pd2Pu1Si2.ICSD.73033    | metal      | metal     |
| Pd2Pu2Sn1.ICSD.150165   | metal      | metal     |
| Pd2Rh15S15.ICSD.648731  | metal      | metal     |
| Pd2S4U1.ICSD.62121      | insulator  | metal     |
| Pd2Sb1.ICSD.77889       | metal      | metal     |
| Pd2Sb2Sr1.ICSD.61194    | metal      | metal     |
| Pd2Sb2Sr1.ICSD.61195    | metal      | metal     |
| Pd2Sc1Sn1.ICSD.105676   | metal      | metal     |
| Pd2Si1Sm1.ICSD.648860   | metal      | metal     |
| Pd2Si1Tb1.ICSD.648866   | metal      | metal     |
| Pd2Si1Y1.ICSD.35087     | metal      | metal     |
| Pd2Si1Yb1.ICSD.247422   | metal      | metal     |
| Pd2Si1.ICSD.43209       | metal      | metal     |
| Pd2Si1.ICSD.659210      | metal      | metal     |
| Pd2Si2Sm1.ICSD.601262   | metal      | metal     |
| Pd2Si2Sm1.ICSD.648862   | metal      | metal     |
| Pd2Si2Sr1.ICSD.648864   | metal      | metal     |
| Pd2Si2Tb1.ICSD.648868   | metal      | metal     |
| Pd2Si2Th1.ICSD.77899    | metal      | metal     |
| Pd2Si2Tm1.ICSD.648879   | metal      | metal     |
| Pd2Si2U1.ICSD.108867    | metal      | metal     |
| Pd2Si2Y1.ICSD.648889    | metal      | metal     |
| Pd2Si2Yb1.ICSD.648891   | metal      | metal     |
| Pd2Si3Y3.ICSD.35086     | metal      | metal     |
| Pd2Sn1Tb1.ICSD.105693   | metal      | metal     |
| Pd2Sn1Tm1.ICSD.105695   | metal      | metal     |
| Pd2Sn1U2.ICSD.107370    | metal      | metal     |
| Pd2Sn1Y1.ICSD.648950    | metal      | metal     |
| Pd2Sn1Yb1.ICSD.105704   | metal      | metal     |
| Pd2Sn1.ICSD.158364      | metal      | metal     |
| Pd2Sr1.ICSD.648962      | metal      | metal     |
| Pd2Ta1.ICSD.648976      | metal      | metal     |
| Pd2Ti1.ICSD.167652      | metal      | metal     |
| Pd2Ti1.ICSD.184671      | metal      | metal     |
| Pd2Ti1.ICSD.649055      | metal      | metal     |
| Pd2V1.ICSD.105741       | metal      | metal     |
| Pd2Y3.ICSD.649100       | metal      | metal     |
| Pd2Yb5.ICSD.649131      | metal      | metal     |
| Pd2Zn1.ICSD.649139      | metal      | metal     |
| Pd2Zr1.ICSD.186413      | metal      | metal     |
| Pd3Pr1.ICSD.648684      | metal      | metal     |
| Pd3Pu1.ICSD.105659      | metal      | metal     |
| Pd3Rb2S4.ICSD.41886     | insulator  | insulator |
| Pd3Rb2S4.ICSD.648723    | insulator  | insulator |
| Pd3Rb2S6U1.ICSD.262562  | insulator  | insulator |
| Pd3Rb2Se4.ICSD.33895    | insulator  | insulator |
| Pd3Rb2Se6U1.ICSD.262561 | insulator  | insulator |
| Pd3S1.ICSD.24347        | metal      | metal     |

Supplementary Table 572. Five-fold cross validated predictions for the metal/insulator classification (564/598).

| system                | calculated | predicted |
|-----------------------|------------|-----------|
| Pd3S1.ICSD.648754     | metal      | metal     |
| Pd3S2Ti2.ICSD.648762  | metal      | metal     |
| Pd3S4Sm1.ICSD.648760  | metal      | metal     |
| Pd3S4Y1.ICSD.648764   | metal      | metal     |
| Pd3Sb4U3.ICSD.648799  | metal      | metal     |
| Pd3Sc1.ICSD.659956    | metal      | metal     |
| Pd3Se2Ti2.ICSD.648844 | metal      | metal     |
| Pd3Se8Ta2.ICSD.73318  | insulator  | insulator |
| Pd3Si1.ICSD.648855    | metal      | metal     |
| Pd3Sm1.ICSD.105679    | metal      | metal     |
| Pd3Sn1.ICSD.648912    | metal      | metal     |
| Pd3Ta1.ICSD.105709    | metal      | metal     |
| Pd3Ta1.ICSD.648968    | metal      | metal     |
| Pd3Tb1.ICSD.648982    | metal      | metal     |
| Pd3Te2.ICSD.77902     | metal      | metal     |
| Pd3Th1.ICSD.150532    | metal      | metal     |
| Pd3Ti1.ICSD.105724    | metal      | metal     |
| Pd3Ti1.ICSD.649037    | metal      | metal     |
| Pd3Ti2.ICSD.105725    | metal      | metal     |
| Pd3Tl1.ICSD.108675    | metal      | metal     |
| Pd3Tl1.ICSD.247272    | metal      | metal     |
| Pd3Tl1.ICSD.649062    | metal      | metal     |
| Pd3Tm1.ICSD.105736    | metal      | metal     |
| Pd3Tm1.ICSD.54335     | metal      | metal     |
| Pd3Tm1.ICSD.649074    | metal      | metal     |
| Pd3Tm1.ICSD.656121    | metal      | metal     |
| Pd3U1.ICSD.649080     | metal      | metal     |
| Pd3U1.ICSD.656100     | metal      | metal     |
| Pd3V1.ICSD.105742     | metal      | metal     |
| Pd3Y1.ICSD.105745     | metal      | metal     |
| Pd3Yb1.ICSD.649116    | metal      | metal     |
| Pd3Zr1.ICSD.105761    | metal      | metal     |
| Pd3Zr1.ICSD.185643    | metal      | metal     |
| Pd4Pu3.ICSD.2516      | metal      | metal     |
| Pd4S1.ICSD.648748     | metal      | metal     |
| Pd4Se1.ICSD.23864     | metal      | metal     |
| Pd4Se6Ti2.ICSD.78786  | insulator  | metal     |
| Pd4Sn16.ICSD.413280   | metal      | metal     |
| Pd4Tb3.ICSD.648980    | metal      | metal     |
| Pd4Te1.ICSD.648990    | metal      | metal     |
| Pd4Th3.ICSD.649031    | metal      | metal     |
| Pd4Y3.ICSD.649109     | metal      | metal     |
| Pd4Yb3.ICSD.649127    | metal      | metal     |
| Pd4Zr3.ICSD.186415    | metal      | metal     |
| Pd5Sb2.ICSD.648767    | metal      | metal     |
| Pd5Se1Ti1.ICSD.648842 | metal      | metal     |
| Pd5Se1Zn1.ICSD.648846 | metal      | metal     |
| Pd5Sr1.ICSD.105707    | metal      | metal     |
| Pd5Th3.ICSD.105719    | metal      | metal     |
| Pd5Ti3.ICSD.105726    | metal      | metal     |

Supplementary Table 573. Five-fold cross validated predictions for the metal/insulator classification (565/598).

| system                 | calculated | predicted |
|------------------------|------------|-----------|
| Pd5Ti3.ICSD.167651     | metal      | metal     |
| Pd7Se2.ICSD.65052      | metal      | metal     |
| Pd7Se4.ICSD.648822     | metal      | metal     |
| Pd8Sn24.ICSD.413279    | metal      | metal     |
| Pd9Te4.ICSD.649011     | metal      | metal     |
| Pr1Pt1Sb1.ICSD.649208  | metal      | metal     |
| Pr1Pt1Sn1.ICSD.416898  | metal      | metal     |
| Pr1Pt1Sn1.ICSD.416900  | metal      | metal     |
| Pr1Pt1.ICSD.108760     | metal      | metal     |
| Pr1Pt1.ICSD.649190     | metal      | metal     |
| Pr1Pt1.ICSD.649192     | metal      | metal     |
| Pr1Pt2Si2.ICSD.649210  | metal      | metal     |
| Pr1Pt2.ICSD.108683     | metal      | metal     |
| Pr1Pt2.ICSD.649199     | metal      | metal     |
| Pr1Pt3.ICSD.108684     | metal      | metal     |
| Pr1Pt5.ICSD.108685     | metal      | metal     |
| Pr1Rb1S2.ICSD.81396    | insulator  | insulator |
| Pr1Rb1Se2.ICSD.281069  | insulator  | insulator |
| Pr1Rb1Te4.ICSD.412794  | metal      | insulator |
| Pr1Re2.ICSD.108688     | metal      | metal     |
| Pr1Re2.ICSD.649213     | metal      | metal     |
| Pr1Re4Si2.ICSD.649216  | metal      | metal     |
| Pr1Rh1Si2.ICSD.603334  | metal      | metal     |
| Pr1Rh1Sn1.ICSD.54339   | metal      | metal     |
| Pr1Rh1.ICSD.649221     | metal      | metal     |
| Pr1Rh2Si2.ICSD.162012  | metal      | metal     |
| Pr1Rh2Si2.ICSD.162015  | metal      | metal     |
| Pr1Rh2.ICSD.108689     | metal      | metal     |
| Pr1Rh2.ICSD.649223     | metal      | metal     |
| Pr1Ru1Si1.ICSD.41253   | metal      | metal     |
| Pr1Ru1Sn1.ICSD.419477  | metal      | metal     |
| Pr1Ru1Sn3.ICSD.601227  | metal      | metal     |
| Pr1Ru2Si2.ICSD.55777   | metal      | metal     |
| Pr1Ru2.ICSD.649234     | metal      | metal     |
| Pr1Ru4Sb12.ICSD.649242 | metal      | metal     |
| Pr1S1.ICSD.649270      | metal      | metal     |
| Pr1S2.ICSD.418406      | insulator  | insulator |
| Pr1S2.ICSD.656241      | metal      | metal     |
| Pr1S6Y3.ICSD.649298    | insulator  | insulator |
| Pr1Sb1Te1.ICSD.601232  | metal      | metal     |
| Pr1Sb1.ICSD.649306     | metal      | metal     |
| Pr1Sb1.ICSD.92166      | metal      | metal     |
| Pr1Sc1Si1.ICSD.649322  | metal      | metal     |
| Pr1Se1.ICSD.77934      | metal      | metal     |
| Pr1Se2Ti1.ICSD.649354  | metal      | insulator |
| Pr1Se2.ICSD.649341     | metal      | metal     |
| Pr1Se3Yb1.ICSD.99667   | metal      | metal     |
| Pr1Si1.ICSD.42945      | metal      | metal     |
| Pr1Si2.ICSD.649376     | metal      | metal     |
| Pr1Si2.ICSD.658012     | metal      | metal     |

Supplementary Table 574. Five-fold cross validated predictions for the metal/insulator classification (566/598).

| system                  | calculated | predicted |
|-------------------------|------------|-----------|
| Pr1Sn1Zn1_ICSD_152625   | metal      | metal     |
| Pr1Sn3_ICSD_649396      | metal      | metal     |
| Pr1Te1_ICSD_649417      | metal      | metal     |
| Pr1Te1_ICSD_77936       | metal      | metal     |
| Pr1Te2Tl1_ICSD_649434   | metal      | insulator |
| Pr1Te2_ICSD_649409      | metal      | metal     |
| Pr1Te2_ICSD_649420      | metal      | metal     |
| Pr1Tl1_ICSD_108699      | metal      | metal     |
| Pr1Tl3_ICSD_108700      | metal      | metal     |
| Pr1Zn11_ICSD_649470     | metal      | metal     |
| Pr1Zn11_ICSD_649486     | insulator  | metal     |
| Pr1Zn1_ICSD_108707      | metal      | metal     |
| Pr1Zn1_ICSD_649465      | metal      | metal     |
| Pr1Zn2_ICSD_649462      | metal      | metal     |
| Pr1Zn2_ICSD_649482      | metal      | metal     |
| Pr1Zn3_ICSD_649473      | metal      | metal     |
| Pr1Zn5_ICSD_108708      | metal      | metal     |
| Pr1_ICSD_164283         | metal      | metal     |
| Pr1_ICSD_43570          | metal      | metal     |
| Pr1_ICSD_43576          | metal      | metal     |
| Pr1_ICSD_54338          | metal      | metal     |
| Pr1_ICSD_649178         | metal      | metal     |
| Pr1_ICSD_649185         | metal      | metal     |
| Pr1_ICSD_74984          | metal      | metal     |
| Pr1_ICSD_77904          | metal      | metal     |
| Pr2Pt3Si5_ICSD_184982   | metal      | metal     |
| Pr2S3_ICSD_83383        | insulator  | insulator |
| Pr2S5Sn1_ICSD_249665    | metal      | metal     |
| Pr2Tl1_ICSD_108701      | metal      | metal     |
| Pr2Zn17_ICSD_104241     | metal      | metal     |
| Pr2Zn17_ICSD_649469     | metal      | metal     |
| Pr3Pt23Si11_ICSD_187875 | metal      | metal     |
| Pr3Pt3Sb4_ICSD_649207   | metal      | metal     |
| Pr3Pt4_ICSD_108686      | metal      | metal     |
| Pr3Rh4Sn13_ICSD_102352  | metal      | metal     |
| Pr3S4_ICSD_649249       | metal      | metal     |
| Pr3S4_ICSD_649275       | metal      | metal     |
| Pr3Se4_ICSD_649347      | metal      | metal     |
| Pr3Sn1_ICSD_649395      | metal      | metal     |
| Pr3Te4_ICSD_649411      | metal      | metal     |
| Pr3Te4_ICSD_649426      | metal      | metal     |
| Pr3Tl1_ICSD_649452      | metal      | metal     |
| Pr3Tl5_ICSD_649450      | metal      | metal     |
| Pr4Sb3_ICSD_649308      | insulator  | metal     |
| Pr5Sb3_ICSD_649307      | metal      | metal     |
| Pt11Zr9_ICSD_105859     | metal      | metal     |
| Pt12Si5_ICSD_649606     | metal      | metal     |
| Pt12Si5_ICSD_77977      | metal      | metal     |
| Pt1Pu1_ICSD_649512      | metal      | metal     |
| Pt1Pu2_ICSD_2256        | metal      | metal     |

Supplementary Table 575. Five-fold cross validated predictions for the metal/insulator classification (567/598).

| system                | calculated | predicted |
|-----------------------|------------|-----------|
| Pt1Rb2S2_ICSD_26259   | insulator  | insulator |
| Pt1Rb2Se2_ICSD_40431  | insulator  | insulator |
| Pt1Rb2Te2_ICSD_649525 | insulator  | insulator |
| Pt1S1Sb1_ICSD_649543  | metal      | insulator |
| Pt1S1_ICSD_31131      | insulator  | insulator |
| Pt1S1_ICSD_649539     | insulator  | insulator |
| Pt1S2_ICSD_603737     | insulator  | insulator |
| Pt1S2_ICSD_659963     | insulator  | insulator |
| Pt1Sb1Sc1_ICSD_77948  | insulator  | metal     |
| Pt1Sb1Se1_ICSD_649563 | metal      | metal     |
| Pt1Sb1Si1_ICSD_413194 | metal      | metal     |
| Pt1Sb1Sr1_ICSD_59185  | metal      | metal     |
| Pt1Sb1Tb1_ICSD_77950  | insulator  | metal     |
| Pt1Sb1Tm1_ICSD_77951  | metal      | metal     |
| Pt1Sb1Y1_ICSD_44970   | insulator  | metal     |
| Pt1Sb1Yb1_ICSD_77953  | metal      | metal     |
| Pt1Sb1_ICSD_649561    | metal      | metal     |
| Pt1Sb2Zr6_ICSD_157366 | metal      | metal     |
| Pt1Sb2_ICSD_77946     | metal      | metal     |
| Pt1Sc1Si1_ICSD_79597  | metal      | metal     |
| Pt1Sc1Sn1_ICSD_108710 | metal      | metal     |
| Pt1Sc1Sn1_ICSD_411822 | metal      | metal     |
| Pt1Sc1Sn1_ICSD_649587 | metal      | metal     |
| Pt1Sc1Zn1_ICSD_424600 | metal      | metal     |
| Pt1Sc1_ICSD_649585    | metal      | metal     |
| Pt1Sc2_ICSD_105785    | metal      | metal     |
| Pt1Sc3Si3_ICSD_421257 | metal      | metal     |
| Pt1Se1Si1_ICSD_649595 | insulator  | insulator |
| Pt1Se2_ICSD_649589    | metal      | metal     |
| Pt1Si1Sm1_ICSD_649618 | metal      | metal     |
| Pt1Si1Sr1_ICSD_604437 | metal      | metal     |
| Pt1Si1Tb1_ICSD_90291  | metal      | metal     |
| Pt1Si1Te1_ICSD_400487 | insulator  | metal     |
| Pt1Si1Ti1_ICSD_260794 | metal      | metal     |
| Pt1Si1Y1_ICSD_649647  | metal      | metal     |
| Pt1Si1Yb1_ICSD_649653 | metal      | metal     |
| Pt1Si1Zr1_ICSD_649654 | metal      | metal     |
| Pt1Si1_ICSD_2623      | metal      | metal     |
| Pt1Si1_ICSD_649603    | metal      | metal     |
| Pt1Si1_ICSD_76627     | insulator  | metal     |
| Pt1Sm1Sn1_ICSD_416897 | metal      | metal     |
| Pt1Sm1Sn1_ICSD_416899 | metal      | metal     |
| Pt1Sm1_ICSD_649657    | metal      | metal     |
| Pt1Sn1Sr1_ICSD_412012 | metal      | metal     |
| Pt1Sn1Tb1_ICSD_417533 | metal      | metal     |
| Pt1Sn1Tb1_ICSD_649683 | metal      | metal     |
| Pt1Sn1Th1_ICSD_108712 | insulator  | metal     |
| Pt1Sn1Ti1_ICSD_105799 | insulator  | metal     |
| Pt1Sn1U1_ICSD_105800  | metal      | metal     |
| Pt1Sn1U1_ICSD_649699  | metal      | metal     |

Supplementary Table 576. Five-fold cross validated predictions for the metal/insulator classification (568/598).

| system                  | calculated | predicted |
|-------------------------|------------|-----------|
| Pt1Sn1Y1.ICSD.417531    | metal      | metal     |
| Pt1Sn1Y1.ICSD.649700    | metal      | metal     |
| Pt1Sn1Yb1.ICSD.410418   | metal      | metal     |
| Pt1Sn1.ICSD.42593       | metal      | metal     |
| Pt1Sn2.ICSD.649679      | metal      | metal     |
| Pt1Sn4.ICSD.105793      | metal      | metal     |
| Pt1Ta1Te5.ICSD.71292    | metal      | metal     |
| Pt1Tb1.ICSD.10511       | metal      | metal     |
| Pt1Tb1.ICSD.649729      | metal      | metal     |
| Pt1Tb2.ICSD.105806      | metal      | metal     |
| Pt1Tb3.ICSD.649727      | metal      | metal     |
| Pt1Te1.ICSD.105812      | metal      | metal     |
| Pt1Te1.ICSD.41383       | metal      | metal     |
| Pt1Te2.ICSD.41385       | metal      | metal     |
| Pt1Th1.ICSD.649759      | metal      | metal     |
| Pt1Ti1.ICSD.105814      | metal      | metal     |
| Pt1Ti1.ICSD.649765      | metal      | metal     |
| Pt1Ti3.ICSD.105816      | metal      | metal     |
| Pt1Ti1.ICSD.105819      | metal      | metal     |
| Pt1Ti2.ICSD.649780      | metal      | metal     |
| Pt1Ti3.ICSD.186644      | metal      | metal     |
| Pt1Tm2.ICSD.649787      | metal      | metal     |
| Pt1U1.ICSD.649811       | metal      | metal     |
| Pt1U1.ICSD.649818       | metal      | metal     |
| Pt1V1.ICSD.649822       | metal      | metal     |
| Pt1V1.ICSD.649839       | metal      | metal     |
| Pt1V3.ICSD.105836       | metal      | metal     |
| Pt1V3.ICSD.649821       | metal      | metal     |
| Pt1Y1.ICSD.649850       | metal      | metal     |
| Pt1Y2.ICSD.649844       | metal      | metal     |
| Pt1Y3.ICSD.8016         | metal      | metal     |
| Pt1Yb1Zn1.ICSD.159305   | metal      | metal     |
| Pt1Yb1.ICSD.649871      | insulator  | metal     |
| Pt1Yb2.ICSD.649873      | metal      | metal     |
| Pt1Zn1.ICSD.649882      | metal      | metal     |
| Pt1Zr1.ICSD.105857      | metal      | metal     |
| Pt1Zr1.ICSD.649884      | metal      | metal     |
| Pt1Zr2.ICSD.649886      | metal      | metal     |
| Pt1.ICSD.41525          | metal      | metal     |
| Pt1.ICSD.76153          | metal      | metal     |
| Pt23Si11U3.ICSD.154517  | metal      | metal     |
| Pt23Si11Yb3.ICSD.182155 | metal      | metal     |
| Pt2Pu1Si2.ICSD.604296   | metal      | metal     |
| Pt2Pu1.ICSD.105773      | insulator  | metal     |
| Pt2Pu2Sn1.ICSD.107351   | metal      | metal     |
| Pt2Sc1Sn1.ICSD.105788   | metal      | metal     |
| Pt2Si1Tb1.ICSD.649624   | metal      | metal     |
| Pt2Si1Y1.ICSD.649645    | metal      | metal     |
| Pt2Si1Yb1.ICSD.247423   | metal      | metal     |
| Pt2Si1.ICSD.649608      | metal      | metal     |

Supplementary Table 577. Five-fold cross validated predictions for the metal/insulator classification (569/598).

| system                  | calculated | predicted |
|-------------------------|------------|-----------|
| Pt2Si1.ICSD.649616      | metal      | metal     |
| Pt2Si2Sm1.ICSD.601234   | metal      | metal     |
| Pt2Si2Sm1.ICSD.649619   | metal      | metal     |
| Pt2Si2Tb1.ICSD.649626   | metal      | metal     |
| Pt2Si2Th1.ICSD.649630   | metal      | metal     |
| Pt2Si2Th1.ICSD.77979    | metal      | metal     |
| Pt2Si2U1.ICSD.167712    | metal      | metal     |
| Pt2Si2U1.ICSD.77980     | metal      | metal     |
| Pt2Si2Y1.ICSD.601235    | metal      | metal     |
| Pt2Si2Y1.ICSD.649646    | metal      | metal     |
| Pt2Si2Yb1.ICSD.77981    | metal      | metal     |
| Pt2Si3.ICSD.77974       | metal      | metal     |
| Pt2Sm1.ICSD.649661      | metal      | metal     |
| Pt2Sn1Tb1.ICSD.649684   | metal      | metal     |
| Pt2Sn1U1.ICSD.649696    | metal      | metal     |
| Pt2Sn1U2.ICSD.602785    | metal      | metal     |
| Pt2Sn1Y1.ICSD.649701    | metal      | metal     |
| Pt2Sn3.ICSD.649674      | metal      | metal     |
| Pt2Sr1.ICSD.108148      | metal      | metal     |
| Pt2Sr3.ICSD.649707      | metal      | metal     |
| Pt2Ta1.ICSD.105802      | metal      | metal     |
| Pt2Tb1.ICSD.105807      | metal      | metal     |
| Pt2Te3.ICSD.41371       | metal      | metal     |
| Pt2Tm1.ICSD.105823      | metal      | metal     |
| Pt2U1.ICSD.105832       | metal      | metal     |
| Pt2V1.ICSD.649828       | metal      | metal     |
| Pt2W1.ICSD.649841       | metal      | metal     |
| Pt2Y1.ICSD.105844       | metal      | metal     |
| Pt2Yb1.ICSD.649863      | metal      | metal     |
| Pt2Yb5.ICSD.649870      | metal      | metal     |
| Pt3Pu1.ICSD.649503      | metal      | metal     |
| Pt3Pu5.ICSD.105776      | metal      | metal     |
| Pt3Pu5.ICSD.1917        | metal      | metal     |
| Pt3Rb2S4.ICSD.26267     | insulator  | insulator |
| Pt3Rb2S6U1.ICSD.262560  | insulator  | insulator |
| Pt3Rb2Se6U1.ICSD.262559 | insulator  | insulator |
| Pt3S8Ta2.ICSD.108849    | insulator  | insulator |
| Pt3Sb1.ICSD.649557      | metal      | metal     |
| Pt3Sb2.ICSD.42752       | metal      | metal     |
| Pt3Sb4U3.ICSD.649575    | insulator  | metal     |
| Pt3Sc1.ICSD.105787      | metal      | metal     |
| Pt3Sc2Si2.ICSD.247425   | metal      | metal     |
| Pt3Se8Ta2.ICSD.77955    | insulator  | insulator |
| Pt3Si1.ICSD.246170      | metal      | metal     |
| Pt3Si1.ICSD.649613      | metal      | metal     |
| Pt3Si1.ICSD.77975       | metal      | metal     |
| Pt3Sm1.ICSD.105790      | metal      | metal     |
| Pt3Sn1.ICSD.105795      | metal      | metal     |
| Pt3Sn4U3.ICSD.649697    | metal      | metal     |
| Pt3Ta1.ICSD.105803      | metal      | metal     |

Supplementary Table 578. Five-fold cross validated predictions for the metal/insulator classification (570/598).

| system                | calculated | predicted |
|-----------------------|------------|-----------|
| Pt3Tb1.ICSD_649732    | metal      | metal     |
| Pt3Tb5.ICSD_649721    | metal      | metal     |
| Pt3Te4.ICSD_41372     | metal      | metal     |
| Pt3Te4.ICSD_77983     | metal      | metal     |
| Pt3Te4.ICSD_87397     | metal      | metal     |
| Pt3Th7.ICSD_150671    | metal      | metal     |
| Pt3Ti1.ICSD_185640    | metal      | metal     |
| Pt3Ti1.ICSD_649772    | metal      | metal     |
| Pt3Ti2.ICSD_105821    | metal      | metal     |
| Pt3Tm1.ICSD_105824    | metal      | metal     |
| Pt3Tm1.ICSD_105825    | metal      | metal     |
| Pt3Tm1.ICSD_649796    | metal      | metal     |
| Pt3Tm5.ICSD_649785    | metal      | metal     |
| Pt3U1.ICSD_649804     | metal      | metal     |
| Pt3V1.ICSD_105840     | metal      | metal     |
| Pt3V1.ICSD_105841     | metal      | metal     |
| Pt3Y1.ICSD_649857     | metal      | metal     |
| Pt3Y5.ICSD_649842     | metal      | metal     |
| Pt3Y7.ICSD_649860     | metal      | metal     |
| Pt3Yb1.ICSD_649864    | metal      | metal     |
| Pt3Yb5.ICSD_649868    | metal      | metal     |
| Pt3Zn1.ICSD_105853    | metal      | metal     |
| Pt3Zr1.ICSD_185646    | metal      | metal     |
| Pt3Zr1.ICSD_649888    | metal      | metal     |
| Pt3Zr5.ICSD_391476    | metal      | metal     |
| Pt4Rb2Se6.ICSD_69439  | insulator  | insulator |
| Pt4S6Ti2.ICSD_78784   | insulator  | insulator |
| Pt4Se6Ti2.ICSD_78785  | insulator  | metal     |
| Pt4Tb3.ICSD_649735    | metal      | metal     |
| Pt4Te6Ti2.ICSD_78787  | metal      | metal     |
| Pt4Y5.ICSD_2422       | metal      | metal     |
| Pt4Yb3.ICSD_105851    | metal      | metal     |
| Pt5Pu1.ICSD_23043     | metal      | metal     |
| Pt5Pu1.ICSD_649510    | insulator  | metal     |
| Pt5S6Ti2.ICSD_73026   | metal      | insulator |
| Pt5Sb1Si1.ICSD_649564 | metal      | metal     |
| Pt5Se4.ICSD_87926     | metal      | metal     |
| Pt5Si1Ti1.ICSD_649632 | metal      | metal     |
| Pt5Sr1.ICSD_105801    | metal      | metal     |
| Pt5Th3.ICSD_649755    | metal      | metal     |
| Pt5Ti3.ICSD_105817    | metal      | metal     |
| Pt5U1.ICSD_649806     | metal      | metal     |
| Pt6Si5.ICSD_649605    | metal      | metal     |
| Pt7Sb1.ICSD_57471     | metal      | metal     |
| Pt7Sc4Si2.ICSD_420438 | metal      | metal     |
| Pt8Sc4Si4.ICSD_420355 | metal      | metal     |
| Pt8Ti1.ICSD_105818    | metal      | metal     |
| Pt8V1.ICSD_180978     | metal      | metal     |
| Pt9Sc5Si7.ICSD_420356 | metal      | metal     |
| Pu1Re2.ICSD_649899    | metal      | metal     |

Supplementary Table 579. Five-fold cross validated predictions for the metal/insulator classification (571/598).

| system                | calculated | predicted |
|-----------------------|------------|-----------|
| Pu1Rh2Si2.ICSD_73032  | metal      | metal     |
| Pu1Rh2.ICSD_649904    | metal      | metal     |
| Pu1Rh3.ICSD_105861    | metal      | metal     |
| Pu1Ru1.ICSD_105865    | metal      | metal     |
| Pu1Ru2Si2.ICSD_73031  | metal      | metal     |
| Pu1Ru2.ICSD_105866    | metal      | metal     |
| Pu1S1.ICSD_31709      | metal      | metal     |
| Pu1S2.ICSD_649932     | metal      | metal     |
| Pu1Sb1Te1.ICSD_601246 | metal      | metal     |
| Pu1Sb1.ICSD_57473     | metal      | metal     |
| Pu1Sb1.ICSD_57474     | metal      | metal     |
| Pu1Sb1.ICSD_649944    | metal      | metal     |
| Pu1Sb2.ICSD_649946    | metal      | metal     |
| Pu1Se1.ICSD_649958    | metal      | metal     |
| Pu1Se2.ICSD_649957    | metal      | metal     |
| Pu1Si1.ICSD_109364    | metal      | metal     |
| Pu1Si1.ICSD_649972    | metal      | metal     |
| Pu1Si2.ICSD_44867     | metal      | metal     |
| Pu1Si2.ICSD_649969    | metal      | metal     |
| Pu1Sn3.ICSD_105874    | metal      | metal     |
| Pu1Te1.ICSD_649980    | metal      | metal     |
| Pu1Te1.ICSD_77986     | metal      | metal     |
| Pu1Te2.ICSD_649988    | metal      | metal     |
| Pu1Zn2.ICSD_105878    | metal      | metal     |
| Pu1.ICSD_43709        | metal      | metal     |
| Pu1.ICSD_44768        | metal      | metal     |
| Pu1.ICSD_44769        | metal      | metal     |
| Pu1.ICSD_44866        | metal      | metal     |
| Pu3Si2.ICSD_649970    | metal      | metal     |
| Pu3Sn1.ICSD_157518    | metal      | metal     |
| Pu5Si3.ICSD_16582     | metal      | metal     |
| Rb1S2Sb1.ICSD_200263  | insulator  | insulator |
| Rb1S2Sb1.ICSD_56788   | insulator  | insulator |
| Rb1S2Sm1.ICSD_81398   | metal      | metal     |
| Rb1S2Sn1.ICSD_23449   | metal      | metal     |
| Rb1S2Sn1.ICSD_650031  | metal      | metal     |
| Rb1S2Tb1.ICSD_81401   | insulator  | insulator |
| Rb1S2Ti1.ICSD_77990   | insulator  | insulator |
| Rb1S2Tm1.ICSD_81405   | insulator  | metal     |
| Rb1S2Yb1.ICSD_81406   | metal      | metal     |
| Rb1S8Sb1U2.ICSD_87804 | insulator  | insulator |
| Rb1S8V5.ICSD_650040   | insulator  | insulator |
| Rb1Sb1Se2.ICSD_602244 | insulator  | insulator |
| Rb1Sb1.ICSD_14030     | insulator  | insulator |
| Rb1Sb2.ICSD_419402    | metal      | insulator |
| Rb1Sc5Te8.ICSD_245998 | insulator  | insulator |
| Rb1Se2Sm1.ICSD_281071 | insulator  | metal     |
| Rb1Se2Tb1.ICSD_281073 | insulator  | insulator |
| Rb1Se2V1.ICSD_415479  | insulator  | insulator |
| Rb1Se8Ti5.ICSD_602323 | insulator  | insulator |

Supplementary Table 580. Five-fold cross validated predictions for the metal/insulator classification (572/598).

| system                | calculated | predicted |
|-----------------------|------------|-----------|
| Rb1Se8V5_ICSD_602326  | metal      | insulator |
| Rb1Si1_ICSD_43519     | insulator  | insulator |
| Rb1Si1_ICSD_650058    | insulator  | insulator |
| Rb1Sm1Te2_ICSD_602830 | metal      | metal     |
| Rb1Sn1_ICSD_650061    | insulator  | metal     |
| Rb1Te2Y1_ICSD_419996  | insulator  | insulator |
| Rb1Te6_ICSD_74837     | metal      | insulator |
| Rb1Zn13_ICSD_150476   | metal      | metal     |
| Rb1_ICSD_109013       | metal      | metal     |
| Rb1_ICSD_109016       | metal      | metal     |
| Rb1_ICSD_109017       | metal      | metal     |
| Rb1_ICSD_109018       | metal      | metal     |
| Rb1_ICSD_109019       | metal      | metal     |
| Rb1_ICSD_161381       | metal      | metal     |
| Rb1_ICSD_248070       | metal      | metal     |
| Rb1_ICSD_44869        | metal      | metal     |
| Rb2S1_ICSD_261443     | insulator  | insulator |
| Rb2S1_ICSD_261444     | insulator  | insulator |
| Rb2S1_ICSD_29208      | insulator  | insulator |
| Rb2S2_ICSD_73175      | insulator  | insulator |
| Rb2S2_ICSD_73176      | insulator  | insulator |
| Rb2S3_ICSD_14092      | insulator  | insulator |
| Rb2S4W1_ICSD_281586   | insulator  | insulator |
| Rb2S4Zn3_ICSD_602243  | insulator  | insulator |
| Rb2S5_ICSD_100321     | insulator  | insulator |
| Rb2Sb4Se8_ICSD_402887 | insulator  | insulator |
| Rb2Sb4Zn5_ICSD_290263 | metal      | insulator |
| Rb2Se1_ICSD_168449    | insulator  | insulator |
| Rb2Se2_ICSD_73177     | insulator  | insulator |
| Rb2Se3_ICSD_14093     | insulator  | insulator |
| Rb2Se4Te1_ICSD_650055 | insulator  | insulator |
| Rb2Se4W1_ICSD_650057  | insulator  | insulator |
| Rb2Se5Sn2_ICSD_80766  | insulator  | insulator |
| Rb2Se5_ICSD_100322    | insulator  | insulator |
| Rb2Sn1Te5_ICSD_40556  | insulator  | insulator |
| Rb2Te1_ICSD_55116     | insulator  | insulator |
| Rb2Te1_ICSD_55128     | insulator  | insulator |
| Rb2Te1_ICSD_55153     | insulator  | insulator |
| Rb2Te2_ICSD_73179     | insulator  | insulator |
| Rb2Te2_ICSD_83350     | insulator  | insulator |
| Rb2Te3Zr1_ICSD_410735 | insulator  | insulator |
| Rb2Te3_ICSD_77994     | insulator  | insulator |
| Rb2Te5_ICSD_30734     | insulator  | insulator |
| Rb3Sb1Se3_ICSD_89608  | insulator  | insulator |
| Rb3Sb1_ICSD_650044    | metal      | insulator |
| Rb4S14Ti3_ICSD_411847 | insulator  | insulator |
| Rb4S4Sn1_ICSD_409647  | insulator  | insulator |
| Rb4S6Si2_ICSD_409804  | insulator  | insulator |
| Rb4Sb4_ICSD_280591    | insulator  | insulator |
| Rb4Se6Sn2_ICSD_74844  | insulator  | insulator |

Supplementary Table 581. Five-fold cross validated predictions for the metal/insulator classification (573/598).

| system                   | calculated | predicted |
|--------------------------|------------|-----------|
| Rb4Te16Zr3_ICSD_280298   | insulator  | insulator |
| Rb8Tl11_ICSD_370035      | metal      | metal     |
| Re0.67Zr1.33_ICSD_650215 | metal      | metal     |
| Re0.83Zr0.17_ICSD_650213 | metal      | metal     |
| Re1S2_ICSD_75459         | insulator  | insulator |
| Re1S2_ICSD_81814         | insulator  | insulator |
| Re1Se2_ICSD_26256        | insulator  | insulator |
| Re1Se2_ICSD_650091       | metal      | insulator |
| Re1Si1Ta1_ICSD_600060    | metal      | metal     |
| Re1Si1Ta1_ICSD_650119    | metal      | metal     |
| Re1Si1Ti1_ICSD_650125    | metal      | metal     |
| Re1Si1Zr1_ICSD_650139    | metal      | metal     |
| Re1Si1_ICSD_26616        | metal      | metal     |
| Re1Si2_ICSD_108721       | metal      | metal     |
| Re1Ti1_ICSD_105896       | metal      | metal     |
| Re1Ti2_ICSD_168953       | metal      | metal     |
| Re1_ICSD_41522           | metal      | metal     |
| Re1_ICSD_64719           | metal      | metal     |
| Re24Sc5_ICSD_105891      | metal      | metal     |
| Re24Ti5_ICSD_650177      | metal      | metal     |
| Re2Sc1Si3_ICSD_41742     | metal      | metal     |
| Re2Sc1_ICSD_650085       | metal      | metal     |
| Re2Si1_ICSD_57480        | metal      | metal     |
| Re2Sm1_ICSD_650141       | metal      | metal     |
| Re2Tb1_ICSD_650153       | metal      | metal     |
| Re2Th1_ICSD_650166       | metal      | metal     |
| Re2U1_ICSD_650184        | metal      | metal     |
| Re2W1_ICSD_650203        | metal      | metal     |
| Re2Y1_ICSD_650202        | metal      | metal     |
| Re2Yb1_ICSD_650204       | metal      | metal     |
| Re2Zr1_ICSD_650212       | metal      | metal     |
| Re3Ru1_ICSD_168956       | metal      | metal     |
| Re3Sc2Si4_ICSD_10043     | metal      | metal     |
| Re3Si5U2_ICSD_650129     | metal      | metal     |
| Re4S4Te4_ICSD_82721      | insulator  | insulator |
| Re4Si2Th1_ICSD_402015    | metal      | metal     |
| Re4Si2Y1_ICSD_41760      | metal      | metal     |
| Re4Si7_ICSD_151529       | insulator  | metal     |
| Re5Si3_ICSD_650114       | metal      | metal     |
| Re7Si6U4_ICSD_2471       | metal      | metal     |
| Rh17S15_ICSD_410838      | metal      | metal     |
| Rh1S1Sb1_ICSD_650233     | insulator  | insulator |
| Rh1S2_ICSD_105914        | metal      | metal     |
| Rh1S2_ICSD_650232        | metal      | metal     |
| Rh1S6Ta3_ICSD_650235     | metal      | metal     |
| Rh1Sb1Se1_ICSD_650254    | insulator  | insulator |
| Rh1Sb1Tb1_ICSD_51842     | metal      | metal     |
| Rh1Sb1Th1_ICSD_52067     | insulator  | metal     |
| Rh1Sb1U1_ICSD_52068      | metal      | metal     |
| Rh1Sb1_ICSD_76621        | metal      | metal     |

Supplementary Table 582. Five-fold cross validated predictions for the metal/insulator classification (574/598).

| system                | calculated | predicted |
|-----------------------|------------|-----------|
| Rh1Sb1.ICSD_991       | metal      | metal     |
| Rh1Sb2Ti5.ICSD_95842  | metal      | metal     |
| Rh1Sb2.ICSD_650241    | metal      | metal     |
| Rh1Sb3.ICSD_34049     | metal      | metal     |
| Rh1Sc1Si1.ICSD_79596  | metal      | metal     |
| Rh1Sc1Si2.ICSD_15248  | metal      | metal     |
| Rh1Sc1.ICSD_105919    | metal      | metal     |
| Rh1Sc3Si3.ICSD_421255 | metal      | metal     |
| Rh1Sc6Te2.ICSD_98971  | metal      | metal     |
| Rh1Se1.ICSD_52069     | metal      | metal     |
| Rh1Se2.ICSD_650276    | metal      | metal     |
| Rh1Se2.ICSD_650286    | metal      | metal     |
| Rh1Si1Ta1.ICSD_90435  | metal      | metal     |
| Rh1Si1Tb1.ICSD_52075  | metal      | metal     |
| Rh1Si1Ti1.ICSD_108723 | metal      | metal     |
| Rh1Si1U1.ICSD_50083   | metal      | metal     |
| Rh1Si1Y1.ICSD_32562   | metal      | metal     |
| Rh1Si1Zr1.ICSD_650356 | metal      | metal     |
| Rh1Si1.ICSD_182505    | metal      | metal     |
| Rh1Si1.ICSD_44385     | metal      | metal     |
| Rh1Si1.ICSD_650297    | metal      | metal     |
| Rh1Si1.ICSD_653588    | metal      | metal     |
| Rh1Si2Y2.ICSD_48176   | metal      | metal     |
| Rh1Si3Sm1.ICSD_650313 | metal      | metal     |
| Rh1Si3Tb1.ICSD_650325 | metal      | metal     |
| Rh1Si3Tb2.ICSD_650328 | metal      | metal     |
| Rh1Si3Th1.ICSD_650335 | metal      | metal     |
| Rh1Si3Y2.ICSD_650353  | metal      | metal     |
| Rh1Si3Y3.ICSD_52079   | metal      | metal     |
| Rh1Sm1Sn1.ICSD_650372 | metal      | metal     |
| Rh1Sm1Zn1.ICSD_419894 | metal      | metal     |
| Rh1Sm1.ICSD_650367    | metal      | metal     |
| Rh1Sn1Tb1.ICSD_650391 | metal      | metal     |
| Rh1Sn1Th1.ICSD_650394 | metal      | metal     |
| Rh1Sn1Tm1.ICSD_411824 | metal      | metal     |
| Rh1Sn1U1.ICSD_650402  | metal      | metal     |
| Rh1Sn1Y1.ICSD_650406  | metal      | metal     |
| Rh1Sn1Yb1.ICSD_650407 | metal      | metal     |
| Rh1Sn1Zr1.ICSD_152133 | metal      | metal     |
| Rh1Sn1Zr1.ICSD_650412 | metal      | metal     |
| Rh1Sn1.ICSD_650381    | metal      | metal     |
| Rh1Sn2.ICSD_650384    | metal      | metal     |
| Rh1Sn2.ICSD_650385    | metal      | metal     |
| Rh1Ta1Te4.ICSD_656453 | metal      | metal     |
| Rh1Tb1Zn1.ICSD_419896 | metal      | metal     |
| Rh1Tb1.ICSD_105942    | metal      | metal     |
| Rh1Tb3.ICSD_650435    | metal      | metal     |
| Rh1Te1.ICSD_26617     | metal      | metal     |
| Rh1Te2.ICSD_650448    | metal      | metal     |
| Rh1Te2.ICSD_650452    | metal      | metal     |

Supplementary Table 583. Five-fold cross validated predictions for the metal/insulator classification (575/598).

| system                | calculated | predicted |
|-----------------------|------------|-----------|
| Rh1Th1.ICSD_650471    | metal      | metal     |
| Rh1Ti1.ICSD_105952    | metal      | metal     |
| Rh1Ti1.ICSD_105953    | metal      | metal     |
| Rh1Ti2.ICSD_650481    | metal      | metal     |
| Rh1Tm1.ICSD_105959    | metal      | metal     |
| Rh1V1.ICSD_169385     | metal      | metal     |
| Rh1V1.ICSD_650512     | metal      | metal     |
| Rh1V3.ICSD_650522     | metal      | metal     |
| Rh1Y1.ICSD_650541     | metal      | metal     |
| Rh1Y3.ICSD_650529     | metal      | metal     |
| Rh1Yb1.ICSD_108726    | metal      | metal     |
| Rh1Zn13.ICSD_107575   | metal      | metal     |
| Rh1Zn1.ICSD_107574    | metal      | metal     |
| Rh1Zr1.ICSD_105979    | metal      | metal     |
| Rh1Zr1.ICSD_105981    | metal      | metal     |
| Rh1Zr1.ICSD_657955    | metal      | metal     |
| Rh1Zr2.ICSD_650562    | metal      | metal     |
| Rh1Zr3.ICSD_650551    | metal      | metal     |
| Rh1.ICSD_41516        | metal      | metal     |
| Rh1.ICSD_53811        | metal      | metal     |
| Rh2S3.ICSD_15344      | insulator  | insulator |
| Rh2Sb1.ICSD_42960     | metal      | metal     |
| Rh2Si1Y1.ICSD_61381   | metal      | metal     |
| Rh2Si1.ICSD_650300    | metal      | metal     |
| Rh2Si2Sm1.ICSD_602245 | metal      | metal     |
| Rh2Si2Sm1.ICSD_650312 | metal      | metal     |
| Rh2Si2Tb1.ICSD_650331 | metal      | metal     |
| Rh2Si2Th1.ICSD_650337 | metal      | metal     |
| Rh2Si2Tm1.ICSD_62725  | metal      | metal     |
| Rh2Si2U1.ICSD_657191  | metal      | metal     |
| Rh2Si2Y1.ICSD_602257  | metal      | metal     |
| Rh2Si2Y3.ICSD_30725   | metal      | metal     |
| Rh2Si2Yb1.ICSD_52083  | metal      | metal     |
| Rh2Si3Y3.ICSD_650344  | metal      | metal     |
| Rh2Sm1.ICSD_105927    | metal      | metal     |
| Rh2Sn1U2.ICSD_246630  | metal      | metal     |
| Rh2Sn1V1.ICSD_105933  | metal      | metal     |
| Rh2Sn1V1.ICSD_105934  | metal      | metal     |
| Rh2Sn1.ICSD_105931    | metal      | metal     |
| Rh2Sr1.ICSD_105937    | metal      | metal     |
| Rh2Ta1.ICSD_650415    | metal      | metal     |
| Rh2Tb1.ICSD_650430    | metal      | metal     |
| Rh2Th1.ICSD_105948    | metal      | metal     |
| Rh2U1Zn20.ICSD_183635 | metal      | metal     |
| Rh2Y1.ICSD_650538     | metal      | metal     |
| Rh2Yb1.ICSD_650546    | metal      | metal     |
| Rh2Zn11.ICSD_107576   | metal      | metal     |
| Rh3S2Sn2.ICSD_420728  | metal      | metal     |
| Rh3S2Ti2.ICSD_650237  | metal      | metal     |
| Rh3S4.ICSD_410813     | metal      | insulator |

Supplementary Table 584. Five-fold cross validated predictions for the metal/insulator classification (576/598).

| system                 | calculated | predicted |
|------------------------|------------|-----------|
| Rh3Sb4U3_ICSD_164407   | metal      | metal     |
| Rh3Sc1Si7_ICSD_15243   | metal      | metal     |
| Rh3Sc1_ICSD_650268     | metal      | metal     |
| Rh3Se8_ICSD_650285     | metal      | metal     |
| Rh3Si2Sm1_ICSD_52074   | metal      | metal     |
| Rh3Si2Y1_ICSD_52080    | metal      | metal     |
| Rh3Si2Y1_ICSD_650345   | metal      | metal     |
| Rh3Si4_ICSD_24354      | metal      | metal     |
| Rh3Si5Tb2_ICSD_154034  | metal      | metal     |
| Rh3Si5Y2_ICSD_40760    | metal      | metal     |
| Rh3Ta1_ICSD_105939     | metal      | metal     |
| Rh3Tb5_ICSD_650433     | metal      | metal     |
| Rh3Tb7_ICSD_650429     | metal      | metal     |
| Rh3Te2_ICSD_650451     | metal      | metal     |
| Rh3Te8_ICSD_2186       | metal      | metal     |
| Rh3Th1_ICSD_650470     | metal      | metal     |
| Rh3Th7_ICSD_650458     | metal      | metal     |
| Rh3Ti1_ICSD_650482     | metal      | metal     |
| Rh3U1_ICSD_650501      | metal      | metal     |
| Rh3V1_ICSD_105966      | metal      | metal     |
| Rh3W1_ICSD_105970      | metal      | metal     |
| Rh3Y1_ICSD_650532      | metal      | metal     |
| Rh3Zr1_ICSD_650565     | metal      | metal     |
| Rh4Sc5Si10_ICSD_650272 | metal      | metal     |
| Rh4Si5_ICSD_24355      | metal      | metal     |
| Rh4Sn13Sr3_ICSD_650389 | metal      | metal     |
| Rh4Sn13Th3_ICSD_102356 | metal      | metal     |
| Rh4Sn13U3_ICSD_54383   | metal      | metal     |
| Rh4Sn13Yb3_ICSD_105936 | metal      | metal     |
| Rh5Si3_ICSD_43338      | metal      | metal     |
| Rh5Tb1_ICSD_105944     | metal      | metal     |
| Rh5Ti3_ICSD_105957     | metal      | metal     |
| Rh5Y1_ICSD_105977      | metal      | metal     |
| Rh5Zr3_ICSD_62932      | metal      | metal     |
| Rh7Sb6Yb4_ICSD_409885  | metal      | metal     |
| Ru1S1Sb1_ICSD_650583   | insulator  | insulator |
| Ru1S2_ICSD_56019       | insulator  | metal     |
| Ru1Sb1Se1_ICSD_650594  | insulator  | insulator |
| Ru1Sb1Ta1_ICSD_107123  | insulator  | metal     |
| Ru1Sb1Te1_ICSD_650595  | insulator  | insulator |
| Ru1Sb1Ti1_ICSD_107127  | metal      | insulator |
| Ru1Sb1U1_ICSD_650597   | metal      | metal     |
| Ru1Sb1V1_ICSD_107124   | insulator  | metal     |
| Ru1Sb1Zr1_ICSD_107126  | metal      | metal     |
| Ru1Sb1_ICSD_990        | metal      | metal     |
| Ru1Sb2U1_ICSD_50351    | metal      | metal     |
| Ru1Sb2_ICSD_42608      | insulator  | metal     |
| Ru1Sc1Si1_ICSD_420417  | metal      | metal     |
| Ru1Sc1Si1_ICSD_650603  | metal      | metal     |
| Ru1Sc1_ICSD_105988     | metal      | metal     |

Supplementary Table 585. Five-fold cross validated predictions for the metal/insulator classification (577/598).

| system                | calculated | predicted |
|-----------------------|------------|-----------|
| Ru1Sc2Si2_ICSD_420133 | metal      | metal     |
| Ru1Sc3Si3_ICSD_421254 | metal      | metal     |
| Ru1Se2_ICSD_68473     | insulator  | insulator |
| Ru1Si1Sm1_ICSD_41254  | metal      | metal     |
| Ru1Si1Ta1_ICSD_600058 | metal      | metal     |
| Ru1Si1Tb1_ICSD_88064  | metal      | metal     |
| Ru1Si1Ti1_ICSD_52090  | metal      | metal     |
| Ru1Si1Ti1_ICSD_57484  | metal      | metal     |
| Ru1Si1U1_ICSD_658289  | metal      | metal     |
| Ru1Si1Y1_ICSD_88063   | metal      | metal     |
| Ru1Si1Zr1_ICSD_16306  | metal      | metal     |
| Ru1Si1_ICSD_650618    | insulator  | metal     |
| Ru1Si1_ICSD_650627    | metal      | metal     |
| Ru1Si2_ICSD_154012    | insulator  | insulator |
| Ru1Si2_ICSD_154013    | metal      | metal     |
| Ru1Si2_ICSD_154014    | metal      | metal     |
| Ru1Si3Th1_ICSD_650644 | metal      | metal     |
| Ru1Sm1Sn3_ICSD_657115 | metal      | metal     |
| Ru1Sn1U1_ICSD_158284  | metal      | metal     |
| Ru1Sn2_ICSD_105993    | metal      | metal     |
| Ru1Ta1Te4_ICSD_656452 | metal      | metal     |
| Ru1Ta1_ICSD_650690    | metal      | metal     |
| Ru1Ta1_ICSD_650692    | metal      | metal     |
| Ru1Tb3_ICSD_650703    | metal      | metal     |
| Ru1Te2_ICSD_650713    | insulator  | insulator |
| Ru1Te2_ICSD_659137    | insulator  | metal     |
| Ru1Th1_ICSD_150820    | metal      | metal     |
| Ru1Ti1_ICSD_106005    | metal      | metal     |
| Ru1Tm3_ICSD_650744    | metal      | metal     |
| Ru1V1_ICSD_106011     | metal      | metal     |
| Ru1V3Zr2_ICSD_650765  | metal      | metal     |
| Ru1Y3_ICSD_650772     | metal      | metal     |
| Ru1Yb1_ICSD_108728    | metal      | metal     |
| Ru1Zn3_ICSD_416747    | metal      | metal     |
| Ru1Zr1_ICSD_181289    | metal      | metal     |
| Ru1_ICSD_41515        | metal      | metal     |
| Ru1_ICSD_44615        | metal      | metal     |
| Ru2Sb2Sr1_ICSD_188979 | metal      | metal     |
| Ru2Sc1_ICSD_650601    | metal      | metal     |
| Ru2Si1_ICSD_650630    | metal      | metal     |
| Ru2Si2Sm1_ICSD_55353  | metal      | metal     |
| Ru2Si2Tb1_ICSD_52089  | metal      | metal     |
| Ru2Si2Th1_ICSD_603984 | metal      | metal     |
| Ru2Si2U1_ICSD_657192  | metal      | metal     |
| Ru2Si2Y1_ICSD_650661  | metal      | metal     |
| Ru2Si2Yb1_ICSD_55357  | metal      | metal     |
| Ru2Si3_ICSD_2344      | insulator  | insulator |
| Ru2Si3_ICSD_95587     | insulator  | insulator |
| Ru2Sm1_ICSD_105991    | metal      | metal     |
| Ru2Sm1_ICSD_650679    | metal      | metal     |

Supplementary Table 586. Five-fold cross validated predictions for the metal/insulator classification (578/598).

| system                | calculated | predicted |
|-----------------------|------------|-----------|
| Ru2Sn1U2_ICSD_107368  | metal      | metal     |
| Ru2Sn2Zn3_ICSD_421663 | metal      | metal     |
| Ru2Sn3_ICSD_105994    | metal      | metal     |
| Ru2Tb1_ICSD_650706    | metal      | metal     |
| Ru2Tb5_ICSD_650702    | metal      | metal     |
| Ru2Th1_ICSD_106002    | metal      | metal     |
| Ru2U1Zn20_ICSD_183634 | metal      | metal     |
| Ru2Y1Zn20_ICSD_152110 | metal      | metal     |
| Ru2Y1_ICSD_650775     | metal      | metal     |
| Ru2Y5_ICSD_650770     | metal      | metal     |
| Ru2Yb1_ICSD_650783    | metal      | metal     |
| Ru2Zr1_ICSD_650790    | metal      | metal     |
| Ru3Si2Th1_ICSD_650643 | metal      | metal     |
| Ru3Si2Y1_ICSD_650662  | metal      | metal     |
| Ru3Si5Tb2_ICSD_57487  | metal      | metal     |
| Ru3Sn7_ICSD_150763    | metal      | metal     |
| Ru3Th7_ICSD_150668    | metal      | metal     |
| Ru3Ti1_ICSD_185635    | metal      | metal     |
| Ru3U1_ICSD_650750     | metal      | metal     |
| Ru3Zr1_ICSD_185641    | metal      | metal     |
| Ru4Sb12Sr1_ICSD_42962 | metal      | metal     |
| Ru4Sc11_ICSD_650599   | metal      | metal     |
| Ru4Si3_ICSD_650617    | metal      | metal     |
| Ru4Si3_ICSD_650632    | metal      | metal     |
| Ru4Sn6Y1_ICSD_54354   | metal      | metal     |
| Ru5Si3_ICSD_650615    | metal      | metal     |
| Ru9Sb8Zn7_ICSD_261057 | metal      | metal     |
| S10_ICSD_38263        | insulator  | insulator |
| S11Ta2Tl4_ICSD_411603 | insulator  | insulator |
| S12_ICSD_26463        | insulator  | insulator |
| S14_ICSD_408504       | insulator  | insulator |
| S16_ICSD_38264        | insulator  | insulator |
| S17Sc1U8_ICSD_650847  | metal      | insulator |
| S18_ICSD_6002         | insulator  | insulator |
| S1Sb1U1_ICSD_650831   | metal      | metal     |
| S1Sc1_ICSD_44971      | metal      | metal     |
| S1Se1U1_ICSD_78584    | metal      | insulator |
| S1Se1_ICSD_62195      | metal      | metal     |
| S1Si1Th1_ICSD_650891  | metal      | metal     |
| S1Si1Zr1_ICSD_15569   | metal      | metal     |
| S1Sm1_ICSD_650946     | metal      | metal     |
| S1Sm1_ICSD_650950     | metal      | metal     |
| S1Sn1_ICSD_30271      | metal      | metal     |
| S1Sn1_ICSD_43409      | insulator  | insulator |
| S1Sn1_ICSD_52109      | insulator  | insulator |
| S1Sn1_ICSD_650998     | metal      | metal     |
| S1Sn1_ICSD_651004     | insulator  | insulator |
| S1Sn1_ICSD_651015     | insulator  | insulator |
| S1Sn1_ICSD_67442      | metal      | metal     |
| S1Sr1_ICSD_28900      | insulator  | insulator |

Supplementary Table 587. Five-fold cross validated predictions for the metal/insulator classification (579/598).

| system             | calculated | predicted |
|--------------------|------------|-----------|
| S1Sr1_ICSD_52111   | insulator  | insulator |
| S1Ta1_ICSD_52114   | metal      | metal     |
| S1Ta2_ICSD_26184   | metal      | metal     |
| S1Ta6_ICSD_16041   | metal      | metal     |
| S1Ta6_ICSD_202564  | metal      | metal     |
| S1Tb1_ICSD_52435   | metal      | metal     |
| S1Te1U1_ICSD_78585 | metal      | metal     |
| S1Te1_ICSD_62197   | metal      | metal     |
| S1Th1_ICSD_651158  | metal      | metal     |
| S1Ti1_ICSD_25561   | metal      | metal     |
| S1Ti1_ICSD_52121   | metal      | metal     |
| S1Ti1_ICSD_52193   | metal      | metal     |
| S1Ti1_ICSD_651179  | metal      | metal     |
| S1Ti1_ICSD_651197  | metal      | metal     |
| S1Ti2_ICSD_15319   | metal      | metal     |
| S1Tl1_ICSD_52201   | metal      | metal     |
| S1Tl1_ICSD_651241  | metal      | insulator |
| S1Tl2_ICSD_42550   | insulator  | insulator |
| S1Tm1_ICSD_106032  | metal      | metal     |
| S1Tm1_ICSD_52204   | metal      | metal     |
| S1Tm1_ICSD_603120  | metal      | metal     |
| S1Tm1_ICSD_651281  | metal      | metal     |
| S1U1_ICSD_60274    | metal      | metal     |
| S1V1_ICSD_52211    | insulator  | metal     |
| S1V1_ICSD_602567   | insulator  | metal     |
| S1V1_ICSD_651373   | metal      | insulator |
| S1V3_ICSD_26516    | metal      | metal     |
| S1V3_ICSD_651364   | metal      | metal     |
| S1V4Zr9_ICSD_81823 | metal      | metal     |
| S1Y1_ICSD_44973    | metal      | metal     |
| S1Yb1_ICSD_651425  | insulator  | metal     |
| S1Zn1_ICSD_107132  | insulator  | insulator |
| S1Zn1_ICSD_107134  | insulator  | insulator |
| S1Zn1_ICSD_107137  | metal      | metal     |
| S1Zn1_ICSD_107150  | insulator  | insulator |
| S1Zn1_ICSD_107185  | insulator  | insulator |
| S1Zn1_ICSD_107611  | insulator  | insulator |
| S1Zn1_ICSD_15477   | insulator  | insulator |
| S1Zn1_ICSD_15478   | insulator  | insulator |
| S1Zn1_ICSD_15736   | insulator  | insulator |
| S1Zn1_ICSD_15737   | insulator  | insulator |
| S1Zn1_ICSD_15740   | insulator  | insulator |
| S1Zn1_ICSD_15741   | insulator  | insulator |
| S1Zn1_ICSD_162754  | insulator  | insulator |
| S1Zn1_ICSD_31076   | insulator  | insulator |
| S1Zn1_ICSD_37373   | insulator  | insulator |
| S1Zn1_ICSD_37374   | insulator  | insulator |
| S1Zn1_ICSD_37375   | insulator  | insulator |
| S1Zn1_ICSD_37376   | insulator  | insulator |
| S1Zn1_ICSD_37391   | insulator  | insulator |

Supplementary Table 588. Five-fold cross validated predictions for the metal/insulator classification (580/598).

| system                 | calculated | predicted |
|------------------------|------------|-----------|
| S1Zn1_ICSD_42192       | insulator  | insulator |
| S1Zn1_ICSD_42787       | insulator  | insulator |
| S1Zn1_ICSD_42792       | insulator  | insulator |
| S1Zn1_ICSD_42799       | metal      | metal     |
| S1Zn1_ICSD_42806       | insulator  | insulator |
| S1Zn1_ICSD_42833       | insulator  | insulator |
| S1Zn1_ICSD_42854       | insulator  | insulator |
| S1Zn1_ICSD_43070       | insulator  | insulator |
| S1Zn1_ICSD_76954       | insulator  | insulator |
| S1Zr1_ICSD_24754       | metal      | metal     |
| S1Zr1_ICSD_52224       | metal      | metal     |
| S1_ICSD_281124         | insulator  | insulator |
| S1_ICSD_57164          | metal      | metal     |
| S1_ICSD_650792         | insulator  | insulator |
| S2Sb1Ti1_ICSD_35498    | insulator  | insulator |
| S2Sc1Ti1_ICSD_418474   | insulator  | insulator |
| S2Si1_ICSD_16952       | insulator  | insulator |
| S2Si1_ICSD_26858       | metal      | insulator |
| S2Si1_ICSD_27205       | insulator  | insulator |
| S2Sm1Ti1_ICSD_650962   | insulator  | metal     |
| S2Sn0.33Ta1_ICSD_74692 | metal      | metal     |
| S2Sn1Ta1_ICSD_651033   | metal      | metal     |
| S2Sn1_ICSD_42566       | insulator  | insulator |
| S2Sn1_ICSD_43003       | insulator  | insulator |
| S2Sr1_ICSD_642         | insulator  | insulator |
| S2Ta1_ICSD_169771      | metal      | metal     |
| S2Ta1_ICSD_24756       | metal      | metal     |
| S2Ta1_ICSD_24757       | metal      | metal     |
| S2Ta1_ICSD_52117       | metal      | metal     |
| S2Ta1_ICSD_651083      | metal      | metal     |
| S2Ta1_ICSD_651086      | metal      | metal     |
| S2Ta1_ICSD_67651       | metal      | metal     |
| S2Ta3_ICSD_71143       | metal      | metal     |
| S2Tb1Ti1_ICSD_651135   | insulator  | insulator |
| S2Tb1_ICSD_52119       | metal      | metal     |
| S2Tb1_ICSD_651124      | metal      | metal     |
| S2Tc1_ICSD_81816       | insulator  | metal     |
| S2Th1_ICSD_651152      | insulator  | insulator |
| S2Ti1_ICSD_174490      | insulator  | insulator |
| S2Ti1_ICSD_181501      | metal      | metal     |
| S2Ti1_ICSD_181502      | metal      | insulator |
| S2Ti1_ICSD_181503      | insulator  | insulator |
| S2Ti1_ICSD_181504      | metal      | insulator |
| S2Ti1_ICSD_181505      | insulator  | insulator |
| S2Ti1_ICSD_181506      | metal      | metal     |
| S2Ti1_ICSD_601182      | insulator  | insulator |
| S2Ti1_ICSD_72042       | metal      | metal     |
| S2Ti1_ICSD_79803       | insulator  | insulator |
| S2Ti1Y1_ICSD_651267    | insulator  | insulator |
| S2Ti1Yb1_ICSD_57119    | metal      | insulator |

Supplementary Table 589. Five-fold cross validated predictions for the metal/insulator classification (581/598).

| system               | calculated | predicted |
|----------------------|------------|-----------|
| S2Ti2_ICSD_76752     | insulator  | insulator |
| S2Ti2_ICSD_78162     | insulator  | insulator |
| S2U1_ICSD_50238      | metal      | metal     |
| S2U1_ICSD_52208      | insulator  | insulator |
| S2U1_ICSD_651311     | insulator  | insulator |
| S2V1_ICSD_68713      | metal      | metal     |
| S2V1_ICSD_77832      | metal      | insulator |
| S2V1_ICSD_86519      | insulator  | metal     |
| S2W1_ICSD_202367     | insulator  | metal     |
| S2W1_ICSD_651387     | insulator  | insulator |
| S2Y1_ICSD_52216      | metal      | metal     |
| S2Y1_ICSD_651404     | metal      | metal     |
| S2Yb1_ICSD_57493     | metal      | metal     |
| S2Yb1_ICSD_651423    | metal      | metal     |
| S2Yb1_ICSD_651433    | insulator  | metal     |
| S2Zn1_ICSD_651447    | insulator  | insulator |
| S2Zr1_ICSD_601166    | insulator  | insulator |
| S2Zr9_ICSD_2774      | metal      | metal     |
| S3Sb1Ti3_ICSD_603664 | insulator  | insulator |
| S3Sb2_ICSD_171852    | insulator  | insulator |
| S3Sc1U1_ICSD_2239    | metal      | metal     |
| S3Sc1Y1_ICSD_23422   | insulator  | insulator |
| S3Sc2_ICSD_22236     | metal      | metal     |
| S3Sm2_ICSD_72821     | insulator  | insulator |
| S3Sn1Sr1_ICSD_651032 | insulator  | insulator |
| S3Sn1Ti2_ICSD_48152  | insulator  | insulator |
| S3Sn1Zr1_ICSD_73711  | insulator  | insulator |
| S3Sn2Ti2_ICSD_33531  | insulator  | insulator |
| S3Sn2_ICSD_31995     | insulator  | insulator |
| S3Sr1Ti1_ICSD_651070 | metal      | metal     |
| S3Sr1Zr1_ICSD_154104 | insulator  | insulator |
| S3Sr1_ICSD_23638     | insulator  | insulator |
| S3Sr2Zn1_ICSD_421354 | insulator  | insulator |
| S3Sr2Zn1_ICSD_422028 | insulator  | insulator |
| S3Ta1Ti1_ICSD_412385 | insulator  | insulator |
| S3Ta1_ICSD_15251     | metal      | metal     |
| S3Tb2_ICSD_80767     | insulator  | insulator |
| S3Te1Ti2_ICSD_391285 | insulator  | insulator |
| S3Th2_ICSD_651154    | metal      | metal     |
| S3Ti1_ICSD_604398    | insulator  | insulator |
| S3Ti1_ICSD_81124     | metal      | insulator |
| S3Ti2Zr1_ICSD_186072 | insulator  | insulator |
| S3Ti4_ICSD_2647      | metal      | insulator |
| S3Ti4_ICSD_651232    | insulator  | insulator |
| S3Tm2_ICSD_39240     | insulator  | insulator |
| S3U1_ICSD_651344     | insulator  | insulator |
| S3U2_ICSD_246850     | metal      | insulator |
| S3U4_ICSD_38354      | metal      | metal     |
| S3Y2_ICSD_651407     | insulator  | insulator |
| S3Y2_ICSD_67502      | insulator  | insulator |

Supplementary Table 590. Five-fold cross validated predictions for the metal/insulator classification (582/598).

| system                 | calculated | predicted |
|------------------------|------------|-----------|
| S3Yb2.ICSD_26973       | metal      | metal     |
| S3Yb2.ICSD_71100       | metal      | metal     |
| S3Yb2.ICSD_72010       | metal      | metal     |
| S3Yb2.ICSD_87356       | metal      | metal     |
| S3Yb2.ICSD_87357       | metal      | metal     |
| S3Zr1.ICSD_651485      | insulator  | insulator |
| S4Sb1Ti3.ICSD_100849   | insulator  | insulator |
| S4Sb1Ti3.ICSD_56789    | insulator  | insulator |
| S4Sb2Yb1.ICSD_600800   | insulator  | insulator |
| S4Sc2Zn1.ICSD_650850   | insulator  | insulator |
| S4Si1Sr2.ICSD_650888   | insulator  | insulator |
| S4Si1Ti4.ICSD_59170    | insulator  | insulator |
| S4Sm3.ICSD_650921      | metal      | metal     |
| S4Sn1Sr2.ICSD_413024   | insulator  | insulator |
| S4Sn1Ti4.ICSD_36369    | insulator  | insulator |
| S4Sr1Tb2.ICSD_651069   | insulator  | insulator |
| S4Sr1Y2.ICSD_651073    | insulator  | insulator |
| S4Sr1Yb2.ICSD_651076   | metal      | metal     |
| S4Ta1Ti3.ICSD_651107   | insulator  | insulator |
| S4Ti1Ti4.ICSD_36368    | insulator  | insulator |
| S4Ti3V1.ICSD_16572     | insulator  | insulator |
| S4Ti4Zr1.ICSD_261208   | insulator  | insulator |
| S4V3.ICSD_41780        | metal      | metal     |
| S4V3.ICSD_72920        | metal      | metal     |
| S4V3.ICSD_79969        | insulator  | metal     |
| S4V5.ICSD_24563        | insulator  | metal     |
| S4Y2Zn1.ICSD_651411    | insulator  | insulator |
| S4Y2Zn1.ICSD_651412    | insulator  | insulator |
| S4Yb3.ICSD_15726       | metal      | metal     |
| S4Zr3.ICSD_651475      | metal      | metal     |
| S5Sb2Sn2.ICSD_35641    | insulator  | insulator |
| S5Sb3Ti1.ICSD_17058    | insulator  | insulator |
| S5Sm2Sn1.ICSD_8233     | metal      | metal     |
| S5Sn1Tb2.ICSD_249668   | metal      | insulator |
| S5Sn2Ti2.ICSD_15494    | insulator  | insulator |
| S5Th2.ICSD_651159      | insulator  | insulator |
| S5Ti2.ICSD_651233      | insulator  | insulator |
| S5U2.ICSD_651315       | insulator  | insulator |
| S5U3.ICSD_23466        | insulator  | insulator |
| S6Si2Ti4.ICSD_35041    | insulator  | insulator |
| S6.ICSD_20710          | insulator  | insulator |
| S7Sb4Sn1.ICSD_169941   | insulator  | insulator |
| S7Tb5.ICSD_651120      | metal      | metal     |
| S7Y5.ICSD_651397       | metal      | metal     |
| S7.ICSD_16469          | insulator  | insulator |
| S8Ti1Ti1V4.ICSD_651224 | metal      | insulator |
| S8Ti1V5.ICSD_100374    | insulator  | metal     |
| S8Ti1V5.ICSD_603658    | insulator  | metal     |
| S8.ICSD_200453         | metal      | metal     |
| S8.ICSD_412326         | metal      | insulator |

Supplementary Table 591. Five-fold cross validated predictions for the metal/insulator classification (583/598).

| system                | calculated | predicted |
|-----------------------|------------|-----------|
| S8.ICSD_43251         | metal      | metal     |
| Sb10Sr11.ICSD_57166   | metal      | metal     |
| Sb10Yb11.ICSD_26237   | metal      | metal     |
| Sb1Sc1.ICSD_157507    | metal      | metal     |
| Sb1Sc1.ICSD_164630    | metal      | metal     |
| Sb1Sc2.ICSD_409586    | metal      | metal     |
| Sb1Se1Th1.ICSD_651533 | metal      | metal     |
| Sb1Se1U1.ICSD_42486   | metal      | metal     |
| Sb1Se2Ti1.ICSD_36537  | insulator  | insulator |
| Sb1Se3Ti3.ICSD_60962  | insulator  | insulator |
| Sb1Sm1Te1.ICSD_602285 | metal      | metal     |
| Sb1Sm1.ICSD_651557    | metal      | metal     |
| Sb1Sm1.ICSD_651560    | metal      | metal     |
| Sb1Sn1.ICSD_52294     | metal      | metal     |
| Sb1Sn1.ICSD_52303     | metal      | metal     |
| Sb1Sn1.ICSD_53968     | metal      | metal     |
| Sb1Sn1.ICSD_651575    | metal      | metal     |
| Sb1Sr2.ICSD_42119     | metal      | metal     |
| Sb1Ta3.ICSD_52310     | metal      | metal     |
| Sb1Tb1Zr1.ICSD_152637 | metal      | metal     |
| Sb1Tb1.ICSD_52437     | metal      | metal     |
| Sb1Te1Th1.ICSD_602304 | metal      | metal     |
| Sb1Te1U1.ICSD_651647  | metal      | metal     |
| Sb1Te2Ti1.ICSD_651642 | metal      | insulator |
| Sb1Th1.ICSD_44718     | metal      | metal     |
| Sb1Th1.ICSD_52316     | metal      | metal     |
| Sb1Ti1.ICSD_96138     | metal      | metal     |
| Sb1Ti3.ICSD_43355     | metal      | metal     |
| Sb1Ti3.ICSD_651683    | metal      | metal     |
| Sb1Ti1.ICSD_184577    | metal      | metal     |
| Sb1Ti1.ICSD_60381     | metal      | metal     |
| Sb1Tm1Zr1.ICSD_107073 | metal      | metal     |
| Sb1Tm1.ICSD_52325     | metal      | metal     |
| Sb1Tm1.ICSD_651692    | metal      | metal     |
| Sb1Tm1.ICSD_651696    | metal      | metal     |
| Sb1Tm1.ICSD_658026    | metal      | metal     |
| Sb1U1.ICSD_52326      | metal      | metal     |
| Sb1U1.ICSD_651704     | metal      | metal     |
| Sb1V1.ICSD_23910      | metal      | metal     |
| Sb1V3.ICSD_106037     | metal      | metal     |
| Sb1Y1Zr1.ICSD_107067  | metal      | metal     |
| Sb1Y1.ICSD_185499     | metal      | metal     |
| Sb1Y1.ICSD_43632      | metal      | metal     |
| Sb1Yb1.ICSD_651761    | metal      | metal     |
| Sb1Zn1.ICSD_651770    | insulator  | metal     |
| Sb1Zr1.ICSD_107692    | metal      | metal     |
| Sb1Zr1.ICSD_52404     | metal      | metal     |
| Sb1Zr2.ICSD_651781    | metal      | metal     |
| Sb1Zr3.ICSD_651786    | metal      | metal     |
| Sb1.ICSD_108182       | metal      | metal     |

Supplementary Table 592. Five-fold cross validated predictions for the metal/insulator classification (584/598).

| system                | calculated | predicted |
|-----------------------|------------|-----------|
| Sb1_ICSD_109037       | metal      | metal     |
| Sb1_ICSD_109038       | metal      | metal     |
| Sb1_ICSD_42678        | metal      | metal     |
| Sb1_ICSD_52198        | metal      | metal     |
| Sb1_ICSD_52226        | metal      | metal     |
| Sb1_ICSD_651488       | metal      | metal     |
| Sb1_ICSD_651504       | metal      | metal     |
| Sb2Se1Te2_ICSD_2085   | metal      | insulator |
| Sb2Se2Te1_ICSD_60963  | insulator  | metal     |
| Sb2Se2Te1_ICSD_651529 | insulator  | metal     |
| Sb2Se3_ICSD_30973     | insulator  | insulator |
| Sb2Se4Ti2_ICSD_20374  | metal      | insulator |
| Sb2Se4Yb1_ICSD_600795 | insulator  | insulator |
| Sb2Si1V4_ICSD_82564   | metal      | metal     |
| Sb2Sm1_ICSD_43029     | metal      | metal     |
| Sb2Sn1Te4_ICSD_657316 | insulator  | insulator |
| Sb2Sn1Zn1_ICSD_651586 | metal      | metal     |
| Sb2Sr1Zn1_ICSD_10001  | metal      | metal     |
| Sb2Sr1Zn2_ICSD_12152  | metal      | metal     |
| Sb2Sr1_ICSD_52307     | metal      | metal     |
| Sb2Ta1_ICSD_52311     | metal      | metal     |
| Sb2Tb1_ICSD_651605    | metal      | metal     |
| Sb2Tb1_ICSD_651606    | metal      | metal     |
| Sb2Te1_ICSD_69557     | metal      | metal     |
| Sb2Te2_ICSD_20459     | metal      | insulator |
| Sb2Te3_ICSD_185953    | metal      | insulator |
| Sb2Te3_ICSD_185954    | metal      | metal     |
| Sb2Te3_ICSD_187496    | metal      | insulator |
| Sb2Te3_ICSD_651638    | metal      | metal     |
| Sb2Te3_ICSD_87415     | metal      | metal     |
| Sb2Th1_ICSD_651663    | metal      | metal     |
| Sb2Ti1_ICSD_52322     | metal      | metal     |
| Sb2Ti1Zn2_ICSD_76499  | metal      | metal     |
| Sb2Ti7_ICSD_52288     | metal      | metal     |
| Sb2Tm1_ICSD_651689    | metal      | metal     |
| Sb2U1_ICSD_43030      | metal      | metal     |
| Sb2V1_ICSD_76407      | metal      | metal     |
| Sb2V3_ICSD_41814      | metal      | metal     |
| Sb2Y1_ICSD_651733     | metal      | metal     |
| Sb2Yb1Zn2_ICSD_419689 | metal      | metal     |
| Sb2Yb1_ICSD_22235     | metal      | metal     |
| Sb2Zr1_ICSD_42878     | metal      | metal     |
| Sb3Si1Zr5_ICSD_57144  | metal      | metal     |
| Sb3Sm4_ICSD_656382    | metal      | metal     |
| Sb3Sr2_ICSD_32033     | insulator  | metal     |
| Sb3Sr5_ICSD_42120     | metal      | metal     |
| Sb3Sr5_ICSD_77751     | metal      | metal     |
| Sb3Tb4_ICSD_601429    | metal      | metal     |
| Sb3Tb5_ICSD_182208    | metal      | metal     |
| Sb3Ti5_ICSD_1345      | metal      | metal     |

Supplementary Table 593. Five-fold cross validated predictions for the metal/insulator classification (585/598).

| system                 | calculated | predicted |
|------------------------|------------|-----------|
| Sb3Y4_ICSD_651736      | metal      | metal     |
| Sb3Y5_ICSD_651739      | metal      | metal     |
| Sb3Yb4_ICSD_651762     | metal      | metal     |
| Sb3Yb5_ICSD_26221      | metal      | metal     |
| Sb3Yb5_ICSD_43032      | metal      | metal     |
| Sb3Zn1Zr5_ICSD_57167   | metal      | metal     |
| Sb3Zn3.6_ICSD_247761   | metal      | metal     |
| Sb3Zr5_ICSD_52408      | metal      | metal     |
| Sb3Zr5_ICSD_651788     | metal      | metal     |
| Sb4Sn3Sr1_ICSD_165617  | metal      | metal     |
| Sb4Ta5_ICSD_280152     | metal      | metal     |
| Sb4Ta5_ICSD_52312      | metal      | metal     |
| Sb4Th3_ICSD_16655      | metal      | metal     |
| Sb4U3_ICSD_167392      | metal      | metal     |
| Sb4V5_ICSD_164410      | metal      | metal     |
| Sb4Zr5_ICSD_153609     | metal      | metal     |
| Sb5Tb2_ICSD_159134     | metal      | metal     |
| Sb5Ti1U3_ICSD_43019    | metal      | metal     |
| Sb8Te3_ICSD_152188     | metal      | metal     |
| Sc1Se1_ICSD_651805     | metal      | metal     |
| Sc1Se2Ti1_ICSD_418475  | insulator  | insulator |
| Sc1Si1Sm1_ICSD_39494   | metal      | metal     |
| Sc1Si1_ICSD_169408     | metal      | metal     |
| Sc1Si1_ICSD_42946      | metal      | metal     |
| Sc1Si2_ICSD_651822     | metal      | metal     |
| Sc1Sn1_ICSD_169410     | metal      | metal     |
| Sc1Te2_ICSD_651831     | metal      | metal     |
| Sc1Te1_ICSD_262042     | metal      | metal     |
| Sc1Te1_ICSD_43593      | metal      | metal     |
| Sc1Te2Ti1_ICSD_418476  | insulator  | insulator |
| Sc1Zn12_ICSD_106042    | metal      | metal     |
| Sc1Zn1_ICSD_106041     | metal      | metal     |
| Sc1Zn2_ICSD_55576      | metal      | metal     |
| Sc1_ICSD_153837        | metal      | metal     |
| Sc1_ICSD_164088        | metal      | metal     |
| Sc1_ICSD_246445        | metal      | metal     |
| Sc1_ICSD_52409         | metal      | metal     |
| Sc1_ICSD_52410         | metal      | metal     |
| Sc1_ICSD_52412         | metal      | metal     |
| Sc1_ICSD_651799        | metal      | metal     |
| Sc2Sr1Te4_ICSD_416325  | insulator  | insulator |
| Sc2Te1_ICSD_406579     | metal      | metal     |
| Sc2Zr1_ICSD_168950     | metal      | metal     |
| Sc3Zn17_ICSD_106043    | metal      | metal     |
| Sc5Si3_ICSD_23932      | metal      | metal     |
| Sc5Si3_ICSD_651814     | metal      | metal     |
| Sc5Sn3_ICSD_402546     | metal      | metal     |
| Sc8.2488_ICSD_164200   | metal      | metal     |
| Se11Ta2Ti4_ICSD_412581 | insulator  | insulator |
| Se17U8V1_ICSD_602307   | metal      | metal     |

Supplementary Table 594. Five-fold cross validated predictions for the metal/insulator classification (586/598).

| system                | calculated | predicted |
|-----------------------|------------|-----------|
| Se1Si1Th1.ICSD_651864 | metal      | metal     |
| Se1Si1U1.ICSD_651868  | metal      | metal     |
| Se1Si1Zr1.ICSD_15571  | metal      | metal     |
| Se1Sm1.ICSD_52421     | metal      | metal     |
| Se1Sm1.ICSD_651876    | metal      | metal     |
| Se1Sm1.ICSD_651894    | metal      | metal     |
| Se1Sn1.ICSD_100673    | insulator  | insulator |
| Se1Sn1.ICSD_41740     | metal      | insulator |
| Se1Sn1.ICSD_50551     | insulator  | metal     |
| Se1Sn1.ICSD_52424     | insulator  | insulator |
| Se1Sr1.ICSD_28901     | insulator  | insulator |
| Se1Ta2.ICSD_657372    | metal      | metal     |
| Se1Tb1.ICSD_52438     | metal      | metal     |
| Se1Tb1.ICSD_651983    | metal      | metal     |
| Se1Te1U1.ICSD_652008  | metal      | metal     |
| Se1Th1.ICSD_26653     | metal      | metal     |
| Se1Th1.ICSD_52443     | metal      | metal     |
| Se1Ti1.ICSD_652036    | metal      | metal     |
| Se1Ti1.ICSD_652041    | metal      | metal     |
| Se1Ti1.ICSD_652055    | insulator  | metal     |
| Se1Ti2.ICSD_96774     | metal      | metal     |
| Se1Ti2.ICSD_96775     | metal      | metal     |
| Se1Tl1.ICSD_52446     | metal      | metal     |
| Se1Tl1.ICSD_652064    | insulator  | insulator |
| Se1Tm1.ICSD_52447     | metal      | metal     |
| Se1Tm1.ICSD_652082    | metal      | metal     |
| Se1Tm1.ICSD_652083    | metal      | metal     |
| Se1U1.ICSD_652103     | metal      | metal     |
| Se1V1.ICSD_83868      | insulator  | insulator |
| Se1Y1.ICSD_652182     | metal      | metal     |
| Se1Yb1.ICSD_52453     | insulator  | metal     |
| Se1Yb1.ICSD_652207    | insulator  | insulator |
| Se1Zn1.ICSD_181672    | insulator  | insulator |
| Se1Zn1.ICSD_67778     | insulator  | insulator |
| Se1Zr2.ICSD_42988     | metal      | metal     |
| Se1.ICSD_104187       | metal      | metal     |
| Se1.ICSD_150731       | metal      | insulator |
| Se1.ICSD_164267       | insulator  | metal     |
| Se1.ICSD_24670        | insulator  | insulator |
| Se1.ICSD_52418        | metal      | metal     |
| Se1.ICSD_57181        | metal      | metal     |
| Se1.ICSD_659254       | metal      | insulator |
| Se2Si1.ICSD_24592     | insulator  | insulator |
| Se2Si1.ICSD_651863    | insulator  | insulator |
| Se2Sm1Tl1.ICSD_651896 | metal      | insulator |
| Se2Sm1.ICSD_651891    | metal      | metal     |
| Se2Sn1.ICSD_656780    | insulator  | insulator |
| Se2Ta1.ICSD_18130     | metal      | metal     |
| Se2Ta1.ICSD_24316     | metal      | metal     |
| Se2Ta1.ICSD_24318     | metal      | metal     |

Supplementary Table 595. Five-fold cross validated predictions for the metal/insulator classification (587/598).

| system                | calculated | predicted |
|-----------------------|------------|-----------|
| Se2Ta1.ICSD_26249     | metal      | metal     |
| Se2Ta1.ICSD_651948    | metal      | metal     |
| Se2Ta1.ICSD_651952    | metal      | metal     |
| Se2Ta1.ICSD_651954    | metal      | metal     |
| Se2Ta1.ICSD_651958    | metal      | metal     |
| Se2Tb1Tl1.ICSD_651989 | insulator  | insulator |
| Se2Th1.ICSD_652016    | insulator  | metal     |
| Se2Ti1.ICSD_652052    | insulator  | metal     |
| Se2Ti9.ICSD_404193    | metal      | metal     |
| Se2Tl1Tm1.ICSD_652071 | metal      | insulator |
| Se2Tl1Y1.ICSD_652075  | insulator  | insulator |
| Se2Tl1Yb1.ICSD_652076 | metal      | insulator |
| Se2Tm1.ICSD_652081    | metal      | metal     |
| Se2U1.ICSD_50239      | metal      | metal     |
| Se2U1.ICSD_652123     | insulator  | metal     |
| Se2V1.ICSD_652160     | metal      | metal     |
| Se2V1.ICSD_652163     | metal      | metal     |
| Se2W1.ICSD_652167     | insulator  | insulator |
| Se2Yb1.ICSD_652201    | metal      | metal     |
| Se2Zn1.ICSD_652213    | insulator  | insulator |
| Se2Zr1.ICSD_109291    | insulator  | insulator |
| Se3Sm2.ICSD_78780     | metal      | metal     |
| Se3Sn1Tl4.ICSD_651938 | metal      | metal     |
| Se3Sr1Zr1.ICSD_84723  | metal      | insulator |
| Se3Ta1Tl1.ICSD_415528 | insulator  | metal     |
| Se3Ta1.ICSD_651959    | metal      | metal     |
| Se3Ta1.ICSD_651965    | metal      | metal     |
| Se3Ta2.ICSD_42982     | metal      | metal     |
| Se3Tb2.ICSD_85417     | insulator  | insulator |
| Se3Th1.ICSD_652028    | insulator  | insulator |
| Se3Th2.ICSD_652026    | metal      | metal     |
| Se3Ti2.ICSD_652069    | insulator  | insulator |
| Se3Ti5.ICSD_20826     | metal      | metal     |
| Se3Ti5.ICSD_30376     | metal      | metal     |
| Se3U1.ICSD_652104     | insulator  | insulator |
| Se3U2.ICSD_652100     | metal      | metal     |
| Se3Yb2.ICSD_281340    | metal      | metal     |
| Se3Zr1.ICSD_25621     | insulator  | insulator |
| Se4Sm3.ICSD_651890    | metal      | metal     |
| Se4Sr1Tb2.ICSD_651942 | insulator  | insulator |
| Se4Sr1Y2.ICSD_651944  | insulator  | insulator |
| Se4Sr1Yb2.ICSD_651945 | metal      | insulator |
| Se4Ta1Tl3.ICSD_600250 | insulator  | insulator |
| Se4Tb3.ICSD_651982    | metal      | metal     |
| Se4Ti1Tl4.ICSD_36370  | insulator  | insulator |
| Se4Ti1Zr1.ICSD_104188 | insulator  | metal     |
| Se4Ti3.ICSD_601347    | metal      | metal     |
| Se4Ti3.ICSD_79629     | metal      | metal     |
| Se4Ti5.ICSD_55075     | metal      | metal     |
| Se4Ti3V1.ICSD_652072  | insulator  | insulator |

Supplementary Table 596. Five-fold cross validated predictions for the metal/insulator classification (588/598).

| system                | calculated | predicted |
|-----------------------|------------|-----------|
| Se4U3.ICSD_60537      | metal      | metal     |
| Se4V3.ICSD_84195      | insulator  | metal     |
| Se4V5.ICSD_652166     | insulator  | metal     |
| Se4Y2Yb1.ICSD_652186  | insulator  | metal     |
| Se4Y2Zn1.ICSD_652188  | insulator  | insulator |
| Se4Yb2Zn1.ICSD_652208 | metal      | metal     |
| Se4Yb3.ICSD_652193    | metal      | metal     |
| Se5Sm2Zr1.ICSD_425081 | metal      | insulator |
| Se5U3.ICSD_2787       | insulator  | metal     |
| Se6Si2Ti4.ICSD_35042  | insulator  | insulator |
| Se6.ICSD_86496        | insulator  | metal     |
| Se8Ti5Ti1.ICSD_37121  | metal      | metal     |
| Se8Ti1V5.ICSD_37122   | insulator  | metal     |
| Se8.ICSD_2718         | insulator  | insulator |
| Se8.ICSD_36333        | insulator  | insulator |
| Se9V2.ICSD_48145      | insulator  | insulator |
| Si136.ICSD_56721      | insulator  | insulator |
| Si1Sm1.ICSD_652266    | metal      | metal     |
| Si1Sm1.ICSD_652276    | metal      | metal     |
| Si1Sn1.ICSD_184676    | metal      | metal     |
| Si1Sn3Zr5.ICSD_656294 | metal      | metal     |
| Si1Sr1Zn1.ICSD_86388  | metal      | metal     |
| Si1Sr1.ICSD_160107    | metal      | metal     |
| Si1Sr1.ICSD_160108    | metal      | metal     |
| Si1Sr1.ICSD_42140     | metal      | metal     |
| Si1Sr1.ICSD_78997     | metal      | metal     |
| Si1Sr2.ICSD_160103    | metal      | metal     |
| Si1Sr2.ICSD_90771     | insulator  | metal     |
| Si1Ta2V3.ICSD_652343  | metal      | metal     |
| Si1Ta2.ICSD_652302    | metal      | metal     |
| Si1Ta3Te6.ICSD_75617  | metal      | metal     |
| Si1Ta3.ICSD_108741    | metal      | metal     |
| Si1Ta4Te4.ICSD_40207  | insulator  | metal     |
| Si1Tb1Ti1.ICSD_95185  | metal      | metal     |
| Si1Tb1.ICSD_23585     | metal      | metal     |
| Si1Tc1.ICSD_652380    | metal      | metal     |
| Si1Te1Th1.ICSD_652386 | metal      | metal     |
| Si1Te1Zr1.ICSD_74522  | metal      | metal     |
| Si1Te2.ICSD_80205     | metal      | insulator |
| Si1Th1.ICSD_26570     | metal      | metal     |
| Si1Th1.ICSD_652406    | metal      | metal     |
| Si1Ti1Y1.ICSD_88113   | metal      | metal     |
| Si1Ti1.ICSD_168416    | metal      | metal     |
| Si1Ti1.ICSD_20375     | metal      | metal     |
| Si1Ti1.ICSD_652436    | metal      | metal     |
| Si1Ti3.ICSD_168414    | metal      | metal     |
| Si1Ti3.ICSD_189704    | metal      | metal     |
| Si1Tm1.ICSD_652456    | metal      | metal     |
| Si1U1.ICSD_652481     | metal      | metal     |
| Si1U3.ICSD_1890       | metal      | metal     |

Supplementary Table 597. Five-fold cross validated predictions for the metal/insulator classification (589/598).

| system                | calculated | predicted |
|-----------------------|------------|-----------|
| Si1U3.ICSD_31627      | metal      | metal     |
| Si1U3.ICSD_652468     | metal      | metal     |
| Si1U3.ICSD_69199      | metal      | metal     |
| Si1V3.ICSD_52472      | metal      | metal     |
| Si1V3.ICSD_652512     | metal      | metal     |
| Si1W3.ICSD_52476      | metal      | metal     |
| Si1Y1.ICSD_262363     | metal      | metal     |
| Si1Y1.ICSD_658905     | metal      | metal     |
| Si1Yb1.ICSD_652599    | metal      | metal     |
| Si1Zr1.ICSD_43245     | metal      | metal     |
| Si1Zr1.ICSD_652617    | metal      | metal     |
| Si1Zr2.ICSD_24717     | metal      | metal     |
| Si1.ICSD_109036       | metal      | insulator |
| Si1.ICSD_181908       | insulator  | insulator |
| Si1.ICSD_181909       | insulator  | insulator |
| Si1.ICSD_189392       | insulator  | insulator |
| Si1.ICSD_189393       | insulator  | insulator |
| Si1.ICSD_189394       | insulator  | insulator |
| Si1.ICSD_189395       | insulator  | insulator |
| Si1.ICSD_189396       | insulator  | insulator |
| Si1.ICSD_189401       | insulator  | insulator |
| Si1.ICSD_41392        | metal      | metal     |
| Si1.ICSD_41991        | metal      | metal     |
| Si1.ICSD_52456        | metal      | metal     |
| Si1.ICSD_52459        | metal      | metal     |
| Si1.ICSD_52460        | metal      | metal     |
| Si1.ICSD_57187        | metal      | metal     |
| Si1.ICSD_67775        | insulator  | insulator |
| Si1.ICSD_67788        | insulator  | metal     |
| Si1.ICSD_89414        | metal      | insulator |
| Si2Sm1.ICSD_652274    | metal      | metal     |
| Si2Sr1.ICSD_2860      | metal      | metal     |
| Si2Sr1.ICSD_30373     | metal      | metal     |
| Si2Sr1.ICSD_37185     | metal      | metal     |
| Si2Ta1.ICSD_652333    | metal      | metal     |
| Si2Ta1.ICSD_96028     | metal      | metal     |
| Si2Tb1.ICSD_20247     | metal      | metal     |
| Si2Tb1.ICSD_652370    | metal      | metal     |
| Si2Tc2Th1.ICSD_73028  | metal      | metal     |
| Si2Te6Ti6.ICSD_416310 | insulator  | insulator |
| Si2Th1.ICSD_26569     | metal      | metal     |
| Si2Th1.ICSD_652390    | metal      | metal     |
| Si2Th1.ICSD_660234    | metal      | metal     |
| Si2Th3.ICSD_26571     | metal      | metal     |
| Si2Th3.ICSD_652398    | metal      | metal     |
| Si2Ti1.ICSD_1089      | metal      | metal     |
| Si2Ti1.ICSD_168419    | metal      | metal     |
| Si2Ti1.ICSD_30217     | metal      | metal     |
| Si2Ti1.ICSD_652419    | metal      | metal     |
| Si2Ti1.ICSD_86810     | metal      | metal     |

Supplementary Table 598. Five-fold cross validated predictions for the metal/insulator classification (590/598).

| system                | calculated | predicted |
|-----------------------|------------|-----------|
| Si2Tm1.ICSD_20251     | metal      | metal     |
| Si2Tm1.ICSD_604540    | metal      | metal     |
| Si2Tm1.ICSD_652451    | metal      | metal     |
| Si2Tm1.ICSD_652455    | metal      | metal     |
| Si2U1.ICSD_203        | metal      | metal     |
| Si2U1.ICSD_652472     | metal      | metal     |
| Si2U3.ICSD_69200      | metal      | metal     |
| Si2V1.ICSD_652528     | metal      | metal     |
| Si2V1.ICSD_96025      | metal      | metal     |
| Si2W1.ICSD_652549     | insulator  | metal     |
| Si2W1.ICSD_652560     | metal      | metal     |
| Si2W3.ICSD_652552     | metal      | metal     |
| Si2Y1.ICSD_150662     | metal      | metal     |
| Si2Y1.ICSD_652584     | metal      | metal     |
| Si2Yb1.ICSD_20252     | metal      | metal     |
| Si2Zr1.ICSD_26758     | metal      | metal     |
| Si3Sr5.ICSD_160105    | metal      | metal     |
| Si3Sr5.ICSD_93701     | metal      | metal     |
| Si3Ta5.ICSD_16775     | metal      | metal     |
| Si3Ta5.ICSD_652324    | metal      | metal     |
| Si3Tb5.ICSD_652353    | metal      | metal     |
| Si3Tc5.ICSD_652383    | metal      | metal     |
| Si3Ti1V4.ICSD_652443  | metal      | metal     |
| Si3Ti5.ICSD_652413    | metal      | metal     |
| Si3U1.ICSD_652466     | metal      | metal     |
| Si3V5.ICSD_652485     | metal      | metal     |
| Si3V5.ICSD_652505     | metal      | metal     |
| Si3W5.ICSD_652550     | metal      | metal     |
| Si3Y1.ICSD_263005     | metal      | metal     |
| Si3Y5.ICSD_652577     | metal      | metal     |
| Si3Yb1.ICSD_710066    | metal      | metal     |
| Si3Yb5.ICSD_652594    | metal      | metal     |
| Si3Zr5.ICSD_652612    | metal      | metal     |
| Si4Ti5.ICSD_168417    | metal      | metal     |
| Si4Yb5.ICSD_153764    | metal      | metal     |
| Si4Zr5.ICSD_20357     | metal      | metal     |
| Si5Ta2V4.ICSD_52463   | metal      | metal     |
| Si5V6.ICSD_652486     | metal      | metal     |
| Si5V6.ICSD_652489     | metal      | metal     |
| Si5Yb3.ICSD_415599    | metal      | metal     |
| Si6Sr1.ICSD_240779    | metal      | metal     |
| Si6Tc7U4.ICSD_80520   | metal      | metal     |
| Si7Tc4.ICSD_652382    | insulator  | metal     |
| Sm1Sn1Zn1.ICSD_152627 | metal      | metal     |
| Sm1Sn2.ICSD_657392    | metal      | metal     |
| Sm1Sn3.ICSD_108747    | metal      | metal     |
| Sm1Te1.ICSD_52484     | metal      | metal     |
| Sm1Te1.ICSD_52485     | metal      | metal     |
| Sm1Te2Tl1.ICSD_652677 | metal      | metal     |
| Sm1Te2.ICSD_652659    | metal      | metal     |

Supplementary Table 599. Five-fold cross validated predictions for the metal/insulator classification (591/598).

| system                | calculated | predicted |
|-----------------------|------------|-----------|
| Sm1Tl1.ICSD_106062    | metal      | metal     |
| Sm1Tl1.ICSD_106063    | metal      | metal     |
| Sm1Tl3.ICSD_106064    | metal      | metal     |
| Sm1Zn1.ICSD_106066    | metal      | metal     |
| Sm1Zn2.ICSD_106067    | metal      | metal     |
| Sm1Zn5.ICSD_106068    | metal      | metal     |
| Sm1.ICSD_52482        | metal      | metal     |
| Sm1.ICSD_652640       | metal      | metal     |
| Sm2Tl1.ICSD_106065    | metal      | metal     |
| Sm2Zn17.ICSD_104243   | metal      | metal     |
| Sm2Zn17.ICSD_652702   | metal      | metal     |
| Sm3Te4.ICSD_652658    | metal      | metal     |
| Sm4Sn3.ICSD_652647    | metal      | metal     |
| Sn10Tb11.ICSD_652733  | metal      | metal     |
| Sn10Y11.ICSD_652838   | metal      | metal     |
| Sn1Sr1Zn1.ICSD_54356  | metal      | metal     |
| Sn1Sr1.ICSD_106073    | metal      | metal     |
| Sn1Sr2.ICSD_652722    | insulator  | metal     |
| Sn1Ta3.ICSD_106076    | metal      | metal     |
| Sn1Tb1Zn1.ICSD_163426 | metal      | metal     |
| Sn1Te1Zr1.ICSD_80190  | metal      | metal     |
| Sn1Te1.ICSD_52488     | metal      | metal     |
| Sn1Te1.ICSD_53956     | insulator  | insulator |
| Sn1Te1.ICSD_652741    | insulator  | insulator |
| Sn1Te1.ICSD_652743    | metal      | metal     |
| Sn1Te3Tl4.ICSD_73087  | metal      | metal     |
| Sn1Te5Tl2.ICSD_73666  | metal      | insulator |
| Sn1Ti2.ICSD_169007    | metal      | metal     |
| Sn1Ti2.ICSD_182428    | metal      | metal     |
| Sn1Ti2.ICSD_189711    | metal      | metal     |
| Sn1Ti3.ICSD_106087    | metal      | metal     |
| Sn1Ti3.ICSD_189710    | metal      | metal     |
| Sn1Ti3.ICSD_652780    | metal      | metal     |
| Sn1Tl1.ICSD_652804    | metal      | metal     |
| Sn1V3.ICSD_106099     | metal      | metal     |
| Sn1V3.ICSD_652830     | metal      | metal     |
| Sn1Y1Zn1.ICSD_152622  | metal      | metal     |
| Sn1Yb1Zn1.ICSD_106444 | metal      | metal     |
| Sn1Yb1.ICSD_652848    | metal      | metal     |
| Sn1Yb2.ICSD_106105    | metal      | metal     |
| Sn1Zr3.ICSD_106108    | metal      | metal     |
| Sn1.ICSD_108748       | metal      | metal     |
| Sn1.ICSD_426976       | metal      | metal     |
| Sn1.ICSD_52487        | metal      | metal     |
| Sn1.ICSD_652714       | metal      | metal     |
| Sn1.ICSD_654522       | metal      | metal     |
| Sn2Sr1Zn2.ICSD_424108 | metal      | metal     |
| Sn2Ta1.ICSD_106077    | metal      | metal     |
| Sn2Tb1Zn1.ICSD_163425 | metal      | metal     |
| Sn2Tb1.ICSD_168671    | metal      | metal     |

Supplementary Table 600. Five-fold cross validated predictions for the metal/insulator classification (592/598).

| system               | calculated | predicted |
|----------------------|------------|-----------|
| Sn2Th1.ICSD_106081   | metal      | metal     |
| Sn2Tm1.ICSD_652806   | metal      | metal     |
| Sn2V1.ICSD_108752    | metal      | metal     |
| Sn2Y1Zn1.ICSD_183309 | metal      | metal     |
| Sn2Y1.ICSD_416771    | metal      | metal     |
| Sn3Sr1.ICSD_410956   | metal      | metal     |
| Sn3Sr5.ICSD_652723   | metal      | metal     |
| Sn3Tb1.ICSD_106079   | metal      | metal     |
| Sn3Tb5.ICSD_652737   | metal      | metal     |
| Sn3Th1.ICSD_106082   | metal      | metal     |
| Sn3Th5.ICSD_106084   | metal      | metal     |
| Sn3Ti5.ICSD_169008   | metal      | metal     |
| Sn3Ti5.ICSD_652783   | metal      | metal     |
| Sn3Ti5.ICSD_652785   | metal      | metal     |
| Sn3U1.ICSD_652817    | metal      | metal     |
| Sn3Y1.ICSD_106102    | metal      | metal     |
| Sn3Y5.ICSD_106103    | metal      | metal     |
| Sn3Yb1.ICSD_652844   | metal      | metal     |
| Sn3Yb5.ICSD_652846   | metal      | metal     |
| Sn3Zr5.ICSD_652854   | metal      | metal     |
| Sn4Sr1.ICSD_54756    | metal      | metal     |
| Sn4Th5.ICSD_106085   | metal      | metal     |
| Sn4Zr5.ICSD_107311   | metal      | metal     |
| Sn5Sr3.ICSD_411981   | metal      | metal     |
| Sn5Ti6.ICSD_169009   | metal      | metal     |
| Sn5Ti6.ICSD_169010   | metal      | metal     |
| Sn5Yb3.ICSD_710073   | metal      | metal     |
| Sn6V6Y1.ICSD_182148  | metal      | metal     |
| Sn7Tb3.ICSD_174437   | metal      | metal     |
| Sr1Te1.ICSD_52491    | insulator  | insulator |
| Sr1Te1.ICSD_53950    | insulator  | insulator |
| Sr1Ti1.ICSD_652886   | metal      | metal     |
| Sr1Ti2.ICSD_106111   | metal      | metal     |
| Sr1Zn11.ICSD_240990  | metal      | metal     |
| Sr1Zn13.ICSD_652897  | metal      | metal     |
| Sr1Zn1.ICSD_652893   | metal      | metal     |
| Sr1Zn2.ICSD_106113   | metal      | metal     |
| Sr1Zn2.ICSD_246194   | metal      | metal     |
| Sr1Zn5.ICSD_418615   | metal      | metal     |
| Sr1Zn5.ICSD_652894   | metal      | metal     |
| Sr1.ICSD_109024      | metal      | metal     |
| Sr1.ICSD_109026      | metal      | metal     |
| Sr1.ICSD_109027      | metal      | metal     |
| Sr1.ICSD_652874      | metal      | metal     |
| Sr1.ICSD_652875      | metal      | metal     |
| Sr1.ICSD_652876      | metal      | metal     |
| Sr1.ICSD_81123       | metal      | metal     |
| Sr3Ti5.ICSD_380325   | metal      | metal     |
| Sr5Ti3.ICSD_652883   | metal      | metal     |
| Ta1Tc1.ICSD_106117   | metal      | metal     |

Supplementary Table 601. Five-fold cross validated predictions for the metal/insulator classification (593/598).

| system                | calculated | predicted |
|-----------------------|------------|-----------|
| Ta1Te2.ICSD_155325    | metal      | metal     |
| Ta1Te2.ICSD_155326    | metal      | metal     |
| Ta1Te4.ICSD_62049     | metal      | metal     |
| Ta1V2.ICSD_106121     | metal      | metal     |
| Ta1Zn2.ICSD_652936    | metal      | metal     |
| Ta1Zn2.ICSD_652937    | metal      | metal     |
| Ta1.ICSD_41520        | metal      | metal     |
| Ta1.ICSD_652898       | metal      | metal     |
| Ta1.ICSD_652900       | metal      | metal     |
| Ta22.ICSD_54203       | metal      | metal     |
| Ta22.ICSD_54206       | metal      | metal     |
| Ta2Te3.ICSD_41047     | metal      | metal     |
| Ta30.ICSD_280872      | metal      | metal     |
| Ta3Te12.ICSD_74414    | metal      | metal     |
| Ta6Zn7.ICSD_652935    | metal      | metal     |
| Ta8.ICSD_54207        | metal      | metal     |
| Tb1Tc2.ICSD_652949    | metal      | metal     |
| Tb1Te1.ICSD_106127    | metal      | metal     |
| Tb1Te2Ti1.ICSD_652962 | insulator  | insulator |
| Tb1Te2.ICSD_652955    | metal      | metal     |
| Tb1Ti1.ICSD_106129    | metal      | metal     |
| Tb1Ti3.ICSD_652975    | metal      | metal     |
| Tb1Zn12.ICSD_652988   | metal      | metal     |
| Tb1Zn1.ICSD_653006    | metal      | metal     |
| Tb1Zn2.ICSD_106138    | metal      | metal     |
| Tb1Zn3.ICSD_652985    | metal      | metal     |
| Tb1.ICSD_104193       | metal      | metal     |
| Tb1.ICSD_52494        | metal      | metal     |
| Tb1.ICSD_52496        | metal      | metal     |
| Tb1.ICSD_652944       | metal      | metal     |
| Tb1.ICSD_652948       | metal      | metal     |
| Tb2Ti1.ICSD_106132    | metal      | metal     |
| Tb2Zn17.ICSD_104244   | metal      | metal     |
| Tb2Zn17.ICSD_652992   | metal      | metal     |
| Tb3Ti5.ICSD_652974    | metal      | metal     |
| Tb3Zn11.ICSD_652984   | metal      | metal     |
| Tb5Ti3.ICSD_106133    | metal      | metal     |
| Tb5Ti3.ICSD_652978    | metal      | metal     |
| Tb6Zn23.ICSD_652986   | metal      | metal     |
| Tc1Ti1.ICSD_106142    | metal      | metal     |
| Tc1V1.ICSD_653028     | metal      | metal     |
| Tc1.ICSD_41514        | metal      | metal     |
| Tc1.ICSD_52498        | metal      | metal     |
| Tc2Th1.ICSD_653016    | metal      | metal     |
| Tc2Y1.ICSD_653038     | metal      | metal     |
| Tc2Zr1.ICSD_423221    | metal      | metal     |
| Te1Th1.ICSD_653065    | metal      | metal     |
| Te1Ti1.ICSD_52503     | metal      | metal     |
| Te1Ti1.ICSD_653081    | insulator  | metal     |
| Te1Ti1.ICSD_52050     | metal      | metal     |

Supplementary Table 602. Five-fold cross validated predictions for the metal/insulator classification (594/598).

| system               | calculated | predicted |
|----------------------|------------|-----------|
| Te1Ti1.ICSD_90895    | metal      | metal     |
| Te1Ti1.ICSD_90900    | metal      | insulator |
| Te1Ti2.ICSD_280923   | insulator  | insulator |
| Te1Tm1.ICSD_107010   | metal      | metal     |
| Te1Tm1.ICSD_43649    | metal      | metal     |
| Te1Tm1.ICSD_52505    | metal      | metal     |
| Te1Tm1.ICSD_52506    | metal      | metal     |
| Te1U1.ICSD_104195    | metal      | metal     |
| Te1U1.ICSD_603009    | metal      | metal     |
| Te1V1.ICSD_52509     | insulator  | metal     |
| Te1Y1.ICSD_106153    | metal      | metal     |
| Te1Yb1.ICSD_33674    | insulator  | metal     |
| Te1Zn1.ICSD_184486   | insulator  | insulator |
| Te1Zn1.ICSD_184488   | insulator  | insulator |
| Te1Zn1.ICSD_184491   | metal      | insulator |
| Te1Zn1.ICSD_31840    | metal      | insulator |
| Te1Zn1.ICSD_67779    | insulator  | insulator |
| Te1Zn1.ICSD_67792    | insulator  | metal     |
| Te1Zn1.ICSD_80076    | insulator  | insulator |
| Te1Zr1.ICSD_104197   | metal      | metal     |
| Te1Zr1.ICSD_280620   | metal      | metal     |
| Te1Zr1.ICSD_52514    | metal      | metal     |
| Te1Zr1.ICSD_653209   | metal      | metal     |
| Te1Zr2.ICSD_87994    | metal      | metal     |
| Te1Zr3.ICSD_51048    | metal      | metal     |
| Te1Zr3.ICSD_653216   | metal      | metal     |
| Te1.ICSD_23060       | insulator  | insulator |
| Te1.ICSD_42106       | metal      | metal     |
| Te1.ICSD_52499       | metal      | metal     |
| Te1.ICSD_52501       | metal      | metal     |
| Te1.ICSD_653048      | insulator  | insulator |
| Te1.ICSD_87272       | metal      | metal     |
| Te1.ICSD_97742       | metal      | insulator |
| Te2Ti1.ICSD_80092    | metal      | metal     |
| Te2Ti1Y1.ICSD_653098 | insulator  | insulator |
| Te2Tm1.ICSD_653106   | metal      | metal     |
| Te2U1.ICSD_82648     | metal      | metal     |
| Te2V1.04.ICSD_38369  | metal      | metal     |
| Te2V1.ICSD_603582    | metal      | metal     |
| Te2W1.ICSD_653168    | metal      | metal     |
| Te2W1.ICSD_653170    | insulator  | metal     |
| Te2Y1.ICSD_653179    | metal      | metal     |
| Te2Y7.ICSD_160182    | metal      | metal     |
| Te2Yb1.ICSD_653189   | metal      | metal     |
| Te2Zr1.ICSD_653213   | metal      | metal     |
| Te3Ti2.ICSD_26282    | insulator  | insulator |
| Te3Ti2.ICSD_410895   | insulator  | insulator |
| Te3Ti5.ICSD_40260    | metal      | metal     |
| Te3Ti5.ICSD_42674    | metal      | metal     |
| Te3Ti5.ICSD_604388   | metal      | metal     |

Supplementary Table 603. Five-fold cross validated predictions for the metal/insulator classification (595/598).

| system               | calculated | predicted |
|----------------------|------------|-----------|
| Te3U1.ICSD_40695     | insulator  | metal     |
| Te3Zr1.ICSD_42076    | metal      | metal     |
| Te4Ti1V2.ICSD_653087 | metal      | metal     |
| Te4Ti1Zr1.ICSD_40496 | metal      | metal     |
| Te4Ti3.ICSD_43412    | metal      | metal     |
| Te4Ti5.ICSD_657485   | metal      | metal     |
| Te4U3.ICSD_653155    | metal      | metal     |
| Te4V3.ICSD_52510     | insulator  | metal     |
| Te4V5.ICSD_42881     | metal      | metal     |
| Te4Zr5.ICSD_653210   | metal      | metal     |
| Te5U1.ICSD_653137    | insulator  | metal     |
| Te5Zr1.ICSD_657473   | metal      | metal     |
| Th1Ti1.ICSD_106158   | metal      | metal     |
| Th1Ti3.ICSD_106159   | metal      | metal     |
| Th1Zn2.ICSD_15445    | metal      | metal     |
| Th1Zn4.ICSD_653259   | metal      | metal     |
| Th1.ICSD_104198      | metal      | metal     |
| Th1.ICSD_53787       | metal      | metal     |
| Th1.ICSD_76038       | metal      | metal     |
| Th2Ti1.ICSD_653245   | metal      | metal     |
| Th2Zn17.ICSD_20238   | metal      | metal     |
| Th2Zn17.ICSD_653255  | metal      | metal     |
| Th2Zn1.ICSD_653254   | metal      | metal     |
| Th3Ti5.ICSD_653244   | metal      | metal     |
| Ti1U2.ICSD_106173    | metal      | metal     |
| Ti1U2.ICSD_96155     | metal      | metal     |
| Ti1Y1.ICSD_188184    | metal      | metal     |
| Ti1Zn2.ICSD_106184   | metal      | metal     |
| Ti1Zn3.ICSD_106185   | metal      | metal     |
| Ti1.ICSD_168322      | metal      | metal     |
| Ti1.ICSD_43733       | metal      | metal     |
| Ti1.ICSD_44391       | metal      | metal     |
| Ti1.ICSD_52521       | metal      | metal     |
| Ti2Zn1.ICSD_653304   | metal      | metal     |
| Ti1Tm1.ICSD_106191   | metal      | metal     |
| Ti1Tm1.ICSD_106192   | metal      | metal     |
| Ti1Tm1.ICSD_653326   | metal      | metal     |
| Ti1Y1.ICSD_106195    | metal      | metal     |
| Ti1Yb1.ICSD_106197   | metal      | metal     |
| Ti1Yb2.ICSD_104201   | metal      | metal     |
| Ti1.ICSD_43414       | metal      | metal     |
| Ti1.ICSD_53778       | metal      | metal     |
| Ti1.ICSD_653316      | metal      | metal     |
| Ti1.ICSD_653322      | metal      | metal     |
| Ti3Tm1.ICSD_106193   | metal      | metal     |
| Ti3Tm1.ICSD_653325   | metal      | metal     |
| Ti3U1.ICSD_653330    | metal      | metal     |
| Ti3Y1.ICSD_653336    | metal      | metal     |
| Ti3Y5.ICSD_653334    | metal      | metal     |
| Ti3Yb1.ICSD_106199   | metal      | metal     |

Supplementary Table 604. Five-fold cross validated predictions for the metal/insulator classification (596/598).

| system              | calculated | predicted |
|---------------------|------------|-----------|
| Tl3Yb8.ICSD_104202  | metal      | metal     |
| Tl5Y3.ICSD_653335   | metal      | metal     |
| Tm1Zn1.ICSD_106203  | metal      | metal     |
| Tm1Zn1.ICSD_653355  | metal      | metal     |
| Tm1Zn1.ICSD_653366  | metal      | metal     |
| Tm1Zn2.ICSD_653350  | metal      | metal     |
| Tm1.ICSD_43584      | metal      | metal     |
| Tm1.ICSD_52526      | metal      | metal     |
| Tm1.ICSD_52528      | metal      | metal     |
| Tm1.ICSD_653345     | metal      | metal     |
| Tm1.ICSD_653347     | metal      | metal     |
| U1.ICSD_16057       | metal      | metal     |
| U1.ICSD_181306      | metal      | metal     |
| U1.ICSD_43339       | metal      | metal     |
| U1.ICSD_653380      | metal      | metal     |
| U2Zn17.ICSD_106208  | metal      | metal     |
| U2Zn17.ICSD_106209  | metal      | metal     |
| V1Zn3.ICSD_106240   | metal      | metal     |
| V1.ICSD_41504       | metal      | metal     |
| V1.ICSD_44322       | metal      | metal     |
| V2Zr1.ICSD_653407   | metal      | metal     |
| V2Zr1.ICSD_653414   | metal      | metal     |
| V4Zn5.ICSD_106213   | metal      | metal     |
| W1.ICSD_41521       | metal      | metal     |
| W1.ICSD_52268       | metal      | metal     |
| W1.ICSD_52344       | metal      | metal     |
| W2Zr1.ICSD_653438   | metal      | metal     |
| W5Zr3.ICSD_653434   | metal      | metal     |
| Xe1.ICSD_43428      | insulator  | insulator |
| Xe1.ICSD_9786       | insulator  | insulator |
| Y1Zn12.ICSD_106229  | metal      | metal     |
| Y1Zn1.ICSD_106226   | metal      | metal     |
| Y1Zn1.ICSD_653464   | metal      | metal     |
| Y1Zn3.ICSD_106227   | metal      | metal     |
| Y1Zn5.ICSD_106228   | metal      | metal     |
| Y1Zn5.ICSD_653462   | metal      | metal     |
| Y1.ICSD_187638      | metal      | metal     |
| Y1.ICSD_41510       | metal      | metal     |
| Y1.ICSD_653450      | metal      | metal     |
| Y2Zn17.ICSD_653458  | metal      | metal     |
| Y2Zn17.ICSD_653467  | metal      | metal     |
| Y3Zn11.ICSD_653456  | metal      | metal     |
| Y6Zn23.ICSD_653457  | metal      | metal     |
| Yb1Zn11.ICSD_653497 | metal      | metal     |
| Yb1Zn13.ICSD_653482 | metal      | metal     |
| Yb1Zn1.ICSD_106232  | insulator  | metal     |
| Yb1Zn1.ICSD_653485  | metal      | metal     |
| Yb1Zn2.ICSD_653489  | metal      | metal     |
| Yb1.ICSD_43572      | metal      | metal     |
| Yb1.ICSD_653477     | metal      | metal     |

Supplementary Table 605. Five-fold cross validated predictions for the metal/insulator classification (597/598).

| system              | calculated | predicted |
|---------------------|------------|-----------|
| Yb1.ICSD_653478     | metal      | metal     |
| Yb2Zn17.ICSD_653483 | metal      | metal     |
| Yb2Zn17.ICSD_653496 | metal      | metal     |
| Yb3Zn11.ICSD_653480 | metal      | metal     |
| Yb3Zn17.ICSD_653490 | metal      | metal     |
| Zn1Zr1.ICSD_106235  | metal      | metal     |
| Zn1Zr1.ICSD_181290  | metal      | metal     |
| Zn1Zr2.ICSD_653511  | metal      | metal     |
| Zn1.ICSD_52543      | metal      | metal     |
| Zn22Zr1.ICSD_106238 | metal      | metal     |
| Zn2Zr1.ICSD_653517  | metal      | metal     |
| Zr1.ICSD_41511      | metal      | metal     |
| Zr1.ICSD_52544      | metal      | metal     |
| Zr1.ICSD_653528     | metal      | metal     |

Supplementary Table 606. Five-fold cross validated predictions for the metal/insulator classification (598/598).

Band gap energy

| system                    | calculated | predicted |
|---------------------------|------------|-----------|
| Ac1Br3.ICSD_31578         | 4.11 eV    | 3.80 eV   |
| Ac1Cl3.ICSD_31569         | 5.08 eV    | 4.26 eV   |
| Ac2O3.ICSD_31750          | 3.52 eV    | 3.45 eV   |
| Ag10C2F8.ICSD_407646      | 2.26 eV    | 2.01 eV   |
| Ag15Cl3P4S16.ICSD_416586  | 1.75 eV    | 1.56 eV   |
| Ag18O21Si6.ICSD_33907     | 0.71 eV    | 0.71 eV   |
| Ag1Al1O2.ICSD_95662       | 1.69 eV    | 1.69 eV   |
| Ag1Al1O2.ICSD_99688       | 1.47 eV    | 2.04 eV   |
| Ag1Al1S2.ICSD_25356       | 1.84 eV    | 1.99 eV   |
| Ag1Al1S2.ICSD_28744       | 2.35 eV    | 1.94 eV   |
| Ag1Al1Se2.ICSD_28745      | 1.56 eV    | 1.22 eV   |
| Ag1Al1Te2.ICSD_28746      | 1.36 eV    | 0.99 eV   |
| Ag1As1C4F6N4S8.ICSD_61131 | 2.80 eV    | 2.69 eV   |
| Ag1As1F6Se3.ICSD_418700   | 1.86 eV    | 2.22 eV   |
| Ag1As1F7.ICSD_62510       | 1.45 eV    | 1.97 eV   |
| Ag1As1Hg1S3.ICSD_31194    | 1.74 eV    | 1.23 eV   |
| Ag1As1Hg2O4.ICSD_413087   | 0.88 eV    | 1.05 eV   |
| Ag1As1K2.ICSD_11154       | 1.03 eV    | 1.08 eV   |
| Ag1As1Na2.ICSD_49007      | 0.79 eV    | 0.91 eV   |
| Ag1As1Pb1S3.ICSD_26835    | 0.33 eV    | 0.99 eV   |
| Ag1As1S2.ICSD_18101       | 1.74 eV    | 1.43 eV   |
| Ag1As1Se2.ICSD_61708      | 0.17 eV    | 0.56 eV   |
| Ag1Au1Ba4O6.ICSD_72329    | 2.04 eV    | 1.69 eV   |
| Ag1Au1Cl4.ICSD_11152      | 1.25 eV    | 1.46 eV   |
| Ag1Au1Cl6Cs2.ICSD_26162   | 0.98 eV    | 1.38 eV   |
| Ag1Au1F4.ICSD_90071       | 2.18 eV    | 1.55 eV   |
| Ag1Au2F8.ICSD_85416       | 0.58 eV    | 1.58 eV   |
| Ag1Au3I8Rb2.ICSD_32031    | 0.68 eV    | 1.34 eV   |
| Ag1B1C4N4.ICSD_411179     | 5.39 eV    | 4.20 eV   |
| Ag1B1F4.ICSD_415320       | 4.84 eV    | 4.50 eV   |
| Ag1B1F5.ICSD_80645        | 0.80 eV    | 2.54 eV   |
| Ag1B7O12Sr1.ICSD_406544   | 3.72 eV    | 3.50 eV   |
| Ag1Ba1Er1S3.ICSD_75074    | 1.31 eV    | 1.45 eV   |
| Ag1Ba1Er1Se3.ICSD_659171  | 1.42 eV    | 1.32 eV   |
| Ag1Ba1F1S1.ICSD_183713    | 1.83 eV    | 1.83 eV   |
| Ag1Ba1F1Se1.ICSD_183714   | 1.60 eV    | 1.61 eV   |
| Ag1Ba1F1Te1.ICSD_419382   | 1.78 eV    | 1.50 eV   |
| Ag1Ba1La1Se3.ICSD_659172  | 1.53 eV    | 1.21 eV   |
| Ag1Ba1Nd1S3.ICSD_659170   | 1.76 eV    | 1.40 eV   |
| Ag1Ba1O9P3.ICSD_50672     | 4.32 eV    | 3.84 eV   |
| Ag1Ba1P1.ICSD_41706       | 0.40 eV    | 0.50 eV   |
| Ag1Ba1Se3Y1.ICSD_104237   | 1.42 eV    | 1.21 eV   |
| Ag1Ba1Te3Y1.ICSD_88717    | 0.84 eV    | 0.73 eV   |
| Ag1Bi1Cl2S1.ICSD_413290   | 1.39 eV    | 1.32 eV   |
| Ag1Bi1Cr2O8.ICSD_8224     | 1.87 eV    | 1.82 eV   |
| Ag1Bi1Cr4O14.ICSD_14234   | 2.42 eV    | 1.67 eV   |
| Ag1Bi1K2.ICSD_11156       | 0.66 eV    | 0.64 eV   |
| Ag1Bi1P2S6.ICSD_170639    | 1.38 eV    | 1.65 eV   |
| Ag1Bi1S2.ICSD_44340       | 0.78 eV    | 0.72 eV   |
| Ag1Bi1Se2.ICSD_26518      | 0.43 eV    | 0.38 eV   |

Supplementary Table 607. Five-fold cross validated predictions for the band gap energy (1/277).

| system                     | calculated | predicted |
|----------------------------|------------|-----------|
| Ag1Bi1Se2.ICSD_26519       | 0.44 eV    | 0.44 eV   |
| Ag1Bi1Se2.ICSD_604856      | 0.44 eV    | 0.44 eV   |
| Ag1Bi1Te2.ICSD_43266       | 0.24 eV    | 0.33 eV   |
| Ag1Bi1Te2.ICSD_604866      | 0.24 eV    | 0.30 eV   |
| Ag1Bi2Cl1S3.ICSD_412372    | 1.13 eV    | 1.15 eV   |
| Ag1Bi2Cl1Se3.ICSD_412371   | 0.80 eV    | 1.01 eV   |
| Ag1Bi3S5.ICSD_171229       | 0.81 eV    | 0.90 eV   |
| Ag1Br13Mo6.ICSD_412903     | 2.37 eV    | 1.79 eV   |
| Ag1Br14W6.ICSD_410958      | 2.77 eV    | 2.18 eV   |
| Ag1Br1H3N1.ICSD_169137     | 1.97 eV    | 2.06 eV   |
| Ag1Br1Hg1S1.ICSD_411773    | 1.72 eV    | 1.42 eV   |
| Ag1Br1O1Pb1.ICSD_33913     | 0.36 eV    | 1.40 eV   |
| Ag1Br1.ICSD_157536         | 1.57 eV    | 1.49 eV   |
| Ag1Br1.ICSD_56550          | 1.56 eV    | 1.50 eV   |
| Ag1Br3Cs2.ICSD_150288      | 3.20 eV    | 2.88 eV   |
| Ag1Br3Rb2.ICSD_150287      | 3.13 eV    | 2.86 eV   |
| Ag1Br5Pb2.ICSD_300100      | 2.58 eV    | 2.17 eV   |
| Ag1C1H3N2.ICSD_169135      | 3.15 eV    | 2.99 eV   |
| Ag1C1N1O1.ICSD_18149       | 3.30 eV    | 2.92 eV   |
| Ag1C1N1O1.ICSD_23832       | 2.68 eV    | 2.71 eV   |
| Ag1C1N1O1.ICSD_23833       | 3.22 eV    | 2.57 eV   |
| Ag1C1N1O1.ICSD_260378      | 1.99 eV    | 2.50 eV   |
| Ag1C1N1.ICSD_85783         | 4.18 eV    | 2.80 eV   |
| Ag1C1N3O2.ICSD_408288      | 3.17 eV    | 2.98 eV   |
| Ag1C2Cl2F6N2Sb1.ICSD_64638 | 3.84 eV    | 3.02 eV   |
| Ag1C2Cs1.ICSD_410873       | 2.97 eV    | 2.42 eV   |
| Ag1C2F6H2N2Sb1.ICSD_63287  | 3.85 eV    | 3.60 eV   |
| Ag1C2H2N3O1.ICSD_63100     | 3.50 eV    | 3.28 eV   |
| Ag1C2K1N2S2.ICSD_280587    | 3.21 eV    | 2.82 eV   |
| Ag1C2K1N2.ICSD_30275       | 3.73 eV    | 3.56 eV   |
| Ag1C2K1.ICSD_410874        | 2.75 eV    | 2.47 eV   |
| Ag1C2Li1.ICSD_410868       | 1.89 eV    | 2.14 eV   |
| Ag1C2N2Na1.ICSD_65697      | 3.52 eV    | 3.16 eV   |
| Ag1C2N3.ICSD_68453         | 3.89 eV    | 3.78 eV   |
| Ag1C2N3.ICSD_843           | 3.80 eV    | 3.59 eV   |
| Ag1C4H12N1Se5.ICSD_159458  | 1.19 eV    | 1.88 eV   |
| Ag1C4N3.ICSD_43823         | 3.57 eV    | 3.51 eV   |
| Ag1Ca1Sb1.ICSD_56982       | 0.14 eV    | 0.29 eV   |
| Ag1Cd1O4V1.ICSD_401350     | 2.59 eV    | 2.14 eV   |
| Ag1Cd2Ga1S4.ICSD_90459     | 1.39 eV    | 1.28 eV   |
| Ag1Ce3Ge1S7.ICSD_604947    | 1.83 eV    | 1.81 eV   |
| Ag1Ce3S7Si1.ICSD_604959    | 1.79 eV    | 1.85 eV   |
| Ag1Ce3Se7Si1.ICSD_604962   | 1.48 eV    | 1.44 eV   |
| Ag1Cl1O2.ICSD_15407        | 1.35 eV    | 1.74 eV   |
| Ag1Cl1O2.ICSD_16717        | 0.98 eV    | 1.39 eV   |
| Ag1Cl1O3.ICSD_30227        | 3.30 eV    | 2.51 eV   |
| Ag1Cl1O4Pb4.ICSD_68309     | 2.43 eV    | 1.84 eV   |
| Ag1Cl1O4.ICSD_185363       | 3.64 eV    | 2.60 eV   |
| Ag1Cl1O4.ICSD_185366       | 3.46 eV    | 3.18 eV   |
| Ag1Cl1O4.ICSD_185367       | 3.38 eV    | 2.90 eV   |

Supplementary Table 608. Five-fold cross validated predictions for the band gap energy (2/277).

| system                     | calculated | predicted |
|----------------------------|------------|-----------|
| Ag1Cl1O4.ICSD.33568        | 2.57 eV    | 2.93 eV   |
| Ag1Cl1.ICSD.56539          | 1.97 eV    | 1.57 eV   |
| Ag1Cl1.ICSD.56543          | 1.96 eV    | 1.38 eV   |
| Ag1Cl1.ICSD.56545          | 1.38 eV    | 1.75 eV   |
| Ag1Cl2Cs1.ICSD.150300      | 2.91 eV    | 2.47 eV   |
| Ag1Cl3Cs2.ICSD.150286      | 3.63 eV    | 3.21 eV   |
| Ag1Cl3Rb2.ICSD.280031      | 3.59 eV    | 2.95 eV   |
| Ag1Co1O2.ICSD.180888       | 0.43 eV    | 0.85 eV   |
| Ag1Co1O2.ICSD.187261       | 0.94 eV    | 0.56 eV   |
| Ag1Co1O2.ICSD.261608       | 0.94 eV    | 0.57 eV   |
| Ag1Co1O4P1.ICSD.100520     | 2.38 eV    | 2.21 eV   |
| Ag1Co3H2O12P3.ICSD.280774  | 0.10 eV    | 2.24 eV   |
| Ag1Cr1O2.ICSD.4149         | 1.63 eV    | 1.53 eV   |
| Ag1Cr1S2.ICSD.42395        | 0.95 eV    | 0.81 eV   |
| Ag1Cr1Se2.ICSD.68423       | 0.35 eV    | 0.55 eV   |
| Ag1Cr2H4O10Sc1.ICSD.156676 | 2.48 eV    | 2.16 eV   |
| Ag1Cr3O8.ICSD.155507       | 1.68 eV    | 1.35 eV   |
| Ag1Cs1F3.ICSD.23154        | 0.28 eV    | 0.93 eV   |
| Ag1Cs1N2O6.ICSD.280069     | 2.88 eV    | 2.33 eV   |
| Ag1Cs1O1.ICSD.25745        | 1.45 eV    | 1.51 eV   |
| Ag1Cs1O1.ICSD.40160        | 1.46 eV    | 1.45 eV   |
| Ag1Cs1O1.ICSD.49754        | 1.48 eV    | 1.51 eV   |
| Ag1Cs1Se4.ICSD.87464       | 1.28 eV    | 1.29 eV   |
| Ag1Cs2F4.ICSD.16254        | 0.48 eV    | 1.64 eV   |
| Ag1Cs2F6K1.ICSD.16783      | 1.54 eV    | 1.72 eV   |
| Ag1Cs2I3.ICSD.150291       | 2.96 eV    | 2.78 eV   |
| Ag1Cs2S4V1.ICSD.50460      | 1.30 eV    | 1.48 eV   |
| Ag1Cs5O9Si3.ICSD.51508     | 2.54 eV    | 2.54 eV   |
| Ag1Cu1O2.ICSD.95089        | 0.27 eV    | 0.56 eV   |
| Ag1Cu1O4P1.ICSD.165596     | 1.24 eV    | 1.08 eV   |
| Ag1Cu1O4P1.ICSD.35590      | 1.25 eV    | 1.04 eV   |
| Ag1Cu1O4V1.ICSD.419201     | 1.13 eV    | 1.37 eV   |
| Ag1Cu1S1.ICSD.30233        | 0.47 eV    | 0.63 eV   |
| Ag1Cu1S1.ICSD.66580        | 0.63 eV    | 0.66 eV   |
| Ag1Cu1S1.ICSD.66582        | 0.58 eV    | 0.57 eV   |
| Ag1Dy1Se2.ICSD.605083      | 1.55 eV    | 1.32 eV   |
| Ag1Dy1Se2.ICSD.605084      | 1.03 eV    | 1.09 eV   |
| Ag1Dy1Te2.ICSD.154794      | 0.88 eV    | 0.85 eV   |
| Ag1Er1O8W2.ICSD.27743      | 3.45 eV    | 2.75 eV   |
| Ag1Er1P2Se6.ICSD.420303    | 1.92 eV    | 1.28 eV   |
| Ag1Er1S2.ICSD.423921       | 1.44 eV    | 1.35 eV   |
| Ag1Er1Se2.ICSD.605115      | 1.57 eV    | 1.43 eV   |
| Ag1Er1Te2.ICSD.154791      | 0.87 eV    | 0.85 eV   |
| Ag1F10P1Xe2.ICSD.412662    | 2.51 eV    | 2.47 eV   |
| Ag1F11Na1Zr2.ICSD.65179    | 2.40 eV    | 3.32 eV   |
| Ag1F11Pd1Zr2.ICSD.65181    | 2.77 eV    | 2.41 eV   |
| Ag1F12Sb2.ICSD.65186       | 1.70 eV    | 1.82 eV   |
| Ag1F12Ta2.ICSD.62543       | 2.41 eV    | 3.00 eV   |
| Ag1F1S1Sr1.ICSD.183709     | 1.63 eV    | 1.70 eV   |
| Ag1F1Se1Sr1.ICSD.183710    | 1.40 eV    | 1.55 eV   |

Supplementary Table 609. Five-fold cross validated predictions for the band gap energy (3/277).

| system                       | calculated | predicted |
|------------------------------|------------|-----------|
| Ag1F1Sr1Te1.ICSD.183711      | 1.56 eV    | 1.58 eV   |
| Ag1F1.ICSD.18008             | 1.08 eV    | 1.08 eV   |
| Ag1F2O6S2.ICSD.422414        | 0.80 eV    | 2.29 eV   |
| Ag1F2.ICSD.6277              | 1.03 eV    | 1.31 eV   |
| Ag1F3O6S16Sb1Te6.ICSD.412325 | 0.95 eV    | 2.05 eV   |
| Ag1F3K1.ICSD.189150          | 0.76 eV    | 1.17 eV   |
| Ag1F3Rb1.ICSD.23153          | 0.24 eV    | 0.76 eV   |
| Ag1F3Zn1.ICSD.28950          | 2.99 eV    | 2.20 eV   |
| Ag1F3.ICSD.80477             | 1.22 eV    | 1.19 eV   |
| Ag1F4K1.ICSD.72715           | 2.15 eV    | 1.53 eV   |
| Ag1F4K2.ICSD.421461          | 2.10 eV    | 1.87 eV   |
| Ag1F4Na1.ICSD.9903           | 1.93 eV    | 1.98 eV   |
| Ag1F4Na2.ICSD.425149         | 2.05 eV    | 1.96 eV   |
| Ag1F6Pd1.ICSD.51507          | 1.34 eV    | 1.49 eV   |
| Ag1F6Sb1.ICSD.28676          | 3.37 eV    | 2.25 eV   |
| Ag1F6Sn1.ICSD.51505          | 2.07 eV    | 2.07 eV   |
| Ag1F6Ta1.ICSD.411796         | 5.27 eV    | 4.30 eV   |
| Ag1F6Ti1.ICSD.51506          | 1.97 eV    | 2.26 eV   |
| Ag1Fe1O6Se2.ICSD.90414       | 2.17 eV    | 2.11 eV   |
| Ag1Fe1O7P2.ICSD.421413       | 2.15 eV    | 2.24 eV   |
| Ag1Fe1O7V2.ICSD.166891       | 2.08 eV    | 1.94 eV   |
| Ag1Fe2S3.ICSD.165661         | 0.29 eV    | 0.63 eV   |
| Ag1Ga1O2.ICSD.95665          | 0.99 eV    | 0.83 eV   |
| Ag1Ga1P2Se6.ICSD.71971       | 0.83 eV    | 1.11 eV   |
| Ag1Ga1S2.ICSD.156785         | 1.51 eV    | 1.46 eV   |
| Ag1Ga1S2.ICSD.92052          | 1.51 eV    | 1.40 eV   |
| Ag1Ga1Se2.ICSD.605211        | 0.70 eV    | 0.92 eV   |
| Ag1Ga1Te2.ICSD.156128        | 0.52 eV    | 0.55 eV   |
| Ag1Gd1Se2.ICSD.602138        | 0.99 eV    | 0.81 eV   |
| Ag1Ge1La3S7.ICSD.80174       | 1.96 eV    | 1.88 eV   |
| Ag1Ge1Pr3S7.ICSD.605303      | 1.80 eV    | 1.75 eV   |
| Ag1H2Ni3O12P3.ICSD.280922    | 3.23 eV    | 2.37 eV   |
| Ag1H2O4V1.ICSD.75941         | 2.71 eV    | 2.05 eV   |
| Ag1H4Mo1N1S4.ICSD.236249     | 1.46 eV    | 2.00 eV   |
| Ag1H4N1S4W1.ICSD.84370       | 1.91 eV    | 2.02 eV   |
| Ag1Hf1Rb1Te3.ICSD.402632     | 0.36 eV    | 0.69 eV   |
| Ag1Hg1I1S1.ICSD.411772       | 1.54 eV    | 1.45 eV   |
| Ag1Hg1I1S1.ICSD.54796        | 1.74 eV    | 1.48 eV   |
| Ag1Hg1O4V1.ICSD.414429       | 1.80 eV    | 1.91 eV   |
| Ag1Hg2N1O5.ICSD.89685        | 1.20 eV    | 1.46 eV   |
| Ag1Hg2O4P1.ICSD.2208         | 1.30 eV    | 1.18 eV   |
| Ag1Hg3O6Sb1.ICSD.170764      | 1.04 eV    | 0.97 eV   |
| Ag1Ho1S2.ICSD.40960          | 1.35 eV    | 1.68 eV   |
| Ag1Ho1Se2.ICSD.156419        | 1.55 eV    | 1.39 eV   |
| Ag1Ho1Se2.ICSD.605365        | 1.02 eV    | 1.13 eV   |
| Ag1Ho1Te2.ICSD.154795        | 0.88 eV    | 0.89 eV   |
| Ag1I1O4.ICSD.52380           | 1.05 eV    | 1.89 eV   |
| Ag1I1Se3.ICSD.414116         | 1.51 eV    | 1.17 eV   |
| Ag1I1Te3.ICSD.414117         | 1.02 eV    | 0.84 eV   |
| Ag1I1.ICSD.161581            | 1.47 eV    | 1.71 eV   |

Supplementary Table 610. Five-fold cross validated predictions for the band gap energy (4/277).

| system                   | calculated | predicted |
|--------------------------|------------|-----------|
| Ag1I1.ICSD.161582        | 0.40 eV    | 1.22 eV   |
| Ag1I1.ICSD.164959        | 1.98 eV    | 1.70 eV   |
| Ag1I1.ICSD.1899          | 2.09 eV    | 1.87 eV   |
| Ag1I1.ICSD.28230         | 1.98 eV    | 1.96 eV   |
| Ag1I1.ICSD.52361         | 1.98 eV    | 1.72 eV   |
| Ag1I1.ICSD.56557         | 1.47 eV    | 1.75 eV   |
| Ag1I1.ICSD.79678         | 2.00 eV    | 1.97 eV   |
| Ag1I2Tl1.ICSD.26318      | 1.63 eV    | 1.91 eV   |
| Ag1I3K2.ICSD.150289      | 2.89 eV    | 2.55 eV   |
| Ag1I3O9Pd1.ICSD.174519   | 2.20 eV    | 1.92 eV   |
| Ag1I3Rb2.ICSD.150290     | 2.89 eV    | 2.72 eV   |
| Ag1I3Tl2.ICSD.78929      | 2.61 eV    | 2.04 eV   |
| Ag1In1O2.ICSD.202429     | 0.60 eV    | 1.08 eV   |
| Ag1In1O2.ICSD.95671      | 0.62 eV    | 0.73 eV   |
| Ag1In1P2Se6.ICSD.71968   | 0.82 eV    | 1.01 eV   |
| Ag1In1S2.ICSD.600585     | 0.92 eV    | 0.94 eV   |
| Ag1In1S2.ICSD.605408     | 1.04 eV    | 0.93 eV   |
| Ag1In1S2.ICSD.659385     | 0.56 eV    | 0.75 eV   |
| Ag1In1Se2.ICSD.605449    | 0.40 eV    | 0.67 eV   |
| Ag1In1Te2.ICSD.104476    | 0.40 eV    | 0.45 eV   |
| Ag1In5Se8.ICSD.35597     | 0.40 eV    | 0.79 eV   |
| Ag1In5Te8.ICSD.151871    | 0.34 eV    | 0.55 eV   |
| Ag1K1O1.ICSD.24818       | 1.50 eV    | 1.50 eV   |
| Ag1K1O1.ICSD.25744       | 1.50 eV    | 1.50 eV   |
| Ag1K2Nb1S4.ICSD.84292    | 2.23 eV    | 1.79 eV   |
| Ag1K2P1.ICSD.402572      | 1.32 eV    | 1.17 eV   |
| Ag1K2S4Sb1.ICSD.82144    | 1.44 eV    | 1.63 eV   |
| Ag1K2S4Ta1.ICSD.84294    | 2.34 eV    | 2.07 eV   |
| Ag1K2S4V1.ICSD.66840     | 1.21 eV    | 1.51 eV   |
| Ag1K2Sb1.ICSD.1155       | 1.18 eV    | 1.04 eV   |
| Ag1K2Se4V1.ICSD.50461    | 0.67 eV    | 1.14 eV   |
| Ag1K3Se8Sn3.ICSD.416330  | 1.15 eV    | 1.13 eV   |
| Ag1La1O1S1.ICSD.89023    | 1.67 eV    | 1.70 eV   |
| Ag1La3S7Si1.ICSD.409845  | 1.93 eV    | 1.99 eV   |
| Ag1La3S7Sn1.ICSD.417316  | 1.88 eV    | 1.74 eV   |
| Ag1La3Se7Si1.ICSD.605509 | 1.58 eV    | 1.50 eV   |
| Ag1La3Se7Sn1.ICSD.417803 | 1.15 eV    | 1.18 eV   |
| Ag1Li2Sb1.ICSD.52589     | 0.41 eV    | 0.42 eV   |
| Ag1Lu1Se2.ICSD.605535    | 1.58 eV    | 1.32 eV   |
| Ag1Mn1O4V1.ICSD.246202   | 2.08 eV    | 1.73 eV   |
| Ag1Mn1O4.ICSD.30200      | 1.39 eV    | 1.55 eV   |
| Ag1N1O2.ICSD.26750       | 1.99 eV    | 2.10 eV   |
| Ag1N1O3.ICSD.1685        | 2.60 eV    | 2.58 eV   |
| Ag1N1O3.ICSD.28103       | 2.59 eV    | 2.59 eV   |
| Ag1N1O3.ICSD.35157       | 2.19 eV    | 2.10 eV   |
| Ag1N1O3.ICSD.374         | 2.35 eV    | 2.27 eV   |
| Ag1N2Na1O4.ICSD.20926    | 2.27 eV    | 1.98 eV   |
| Ag1N3O4.ICSD.419628      | 2.65 eV    | 2.61 eV   |
| Ag1N3.ICSD.183201        | 2.22 eV    | 2.19 eV   |
| Ag1N3.ICSD.27135         | 2.23 eV    | 2.22 eV   |

Supplementary Table 611. Five-fold cross validated predictions for the band gap energy (5/277).

| system                   | calculated | predicted |
|--------------------------|------------|-----------|
| Ag1Na1O1.ICSD.188524     | 1.31 eV    | 1.24 eV   |
| Ag1Na1O3S2.ICSD.418297   | 2.89 eV    | 2.24 eV   |
| Ag1Na2Sb1.ICSD.10010     | 0.79 eV    | 0.84 eV   |
| Ag1Na3O2.ICSD.24817      | 1.32 eV    | 1.45 eV   |
| Ag1Na3S2.ICSD.201800     | 2.23 eV    | 1.87 eV   |
| Ag1Nb1O3.ICSD.164198     | 2.13 eV    | 2.17 eV   |
| Ag1Nb1O3.ICSD.55647      | 1.84 eV    | 1.98 eV   |
| Ag1Nb1O3.ICSD.55649      | 1.77 eV    | 1.74 eV   |
| Ag1Nb1Rb2S4.ICSD.50463   | 1.93 eV    | 1.94 eV   |
| Ag1Nb1Rb2Se4.ICSD.402423 | 1.86 eV    | 1.67 eV   |
| Ag1Nb3O8.ICSD.67244      | 2.38 eV    | 2.36 eV   |
| Ag1O13P4Ta1.ICSD.86892   | 3.37 eV    | 3.21 eV   |
| Ag1O1P1Th1.ICSD.419463   | 0.17 eV    | 0.97 eV   |
| Ag1O1Rb1.ICSD.188526     | 1.45 eV    | 1.42 eV   |
| Ag1O1Rb1.ICSD.40155      | 1.45 eV    | 1.43 eV   |
| Ag1O1.ICSD.202055        | 0.33 eV    | 0.42 eV   |
| Ag1O1.ICSD.43741         | 0.34 eV    | 0.40 eV   |
| Ag1O2Rh1.ICSD.261561     | 1.65 eV    | 1.25 eV   |
| Ag1O2Sc1.ICSD.422442     | 2.44 eV    | 1.97 eV   |
| Ag1O2Sc1.ICSD.95668      | 2.46 eV    | 2.29 eV   |
| Ag1O2Y1.ICSD.95674       | 2.54 eV    | 1.98 eV   |
| Ag1O2Yb1.ICSD.163472     | 0.50 eV    | 0.75 eV   |
| Ag1O3Sb1.ICSD.245292     | 1.09 eV    | 1.30 eV   |
| Ag1O3Sb1.ICSD.25541      | 0.61 eV    | 1.11 eV   |
| Ag1O3Ta1.ICSD.40830      | 2.58 eV    | 2.55 eV   |
| Ag1O3Ta1.ICSD.40831      | 2.57 eV    | 2.46 eV   |
| Ag1O3Te1Th1.ICSD.169995  | 2.67 eV    | 1.48 eV   |
| Ag1O3V1.ICSD.50645       | 2.76 eV    | 1.98 eV   |
| Ag1O3V1.ICSD.82079       | 2.05 eV    | 1.66 eV   |
| Ag1O4P1Zn1.ICSD.260974   | 2.47 eV    | 2.48 eV   |
| Ag1O4Re1.ICSD.280086     | 3.09 eV    | 2.44 eV   |
| Ag1O4Tc1.ICSD.281321     | 2.34 eV    | 2.17 eV   |
| Ag1O5Se1V1.ICSD.417773   | 1.23 eV    | 1.98 eV   |
| Ag1O5Te1V1.ICSD.417774   | 2.92 eV    | 2.36 eV   |
| Ag1O6Th1V2.ICSD.201934   | 2.76 eV    | 2.35 eV   |
| Ag1P1S3.ICSD.653748      | 1.52 eV    | 1.68 eV   |
| Ag1P1S4Zn1.ICSD.48197    | 2.48 eV    | 2.03 eV   |
| Ag1P1Sr1.ICSD.52596      | 0.36 eV    | 0.44 eV   |
| Ag1P2S6Sc1.ICSD.63273    | 2.23 eV    | 1.91 eV   |
| Ag1P2S6V1.ICSD.655222    | 0.89 eV    | 1.19 eV   |
| Ag1P2Sc1Se6.ICSD.420302  | 1.94 eV    | 1.27 eV   |
| Ag1P2Se6V1.ICSD.68143    | 0.73 eV    | 0.97 eV   |
| Ag1P2.ICSD.35283         | 0.75 eV    | 0.81 eV   |
| Ag1Pb1Pr1.ICSD.107101    | 0.10 eV    | 0.18 eV   |
| Ag1Pb1S3Sb1.ICSD.24257   | 0.78 eV    | 0.94 eV   |
| Ag1Pb1S3Sb1.ICSD.8166    | 0.36 eV    | 0.93 eV   |
| Ag1Pr3S7Si1.ICSD.605682  | 1.78 eV    | 1.82 eV   |
| Ag1Pr3Se7Si1.ICSD.605685 | 1.49 eV    | 1.35 eV   |
| Ag1Rb1S3U1.ICSD.249702   | 1.67 eV    | 1.65 eV   |
| Ag1Rb1Se3U1.ICSD.249703  | 1.35 eV    | 1.18 eV   |

Supplementary Table 612. Five-fold cross validated predictions for the band gap energy (6/277).

| system                        | calculated | predicted |
|-------------------------------|------------|-----------|
| Ag1Rb1Se4.ICSD.87463          | 1.19 eV    | 1.14 eV   |
| Ag1Rb2S4Ta1.ICSD.84295        | 2.30 eV    | 2.24 eV   |
| Ag1Rb2S4V1.ICSD.66841         | 1.59 eV    | 1.59 eV   |
| Ag1Rb2Se4V1.ICSD.50462        | 1.23 eV    | 1.13 eV   |
| Ag1Rb3Se8Sn3.ICSD.416294      | 1.21 eV    | 1.16 eV   |
| Ag1S1Ti1.ICSD.605754          | 0.97 eV    | 1.03 eV   |
| Ag1S2Sb1.ICSD.16578           | 1.40 eV    | 1.37 eV   |
| Ag1S2Sb1.ICSD.85130           | 1.38 eV    | 1.33 eV   |
| Ag1S2Sb1.ICSD.94647           | 1.37 eV    | 1.35 eV   |
| Ag1Sb1Te2.ICSD.704040         | 0.12 eV    | 0.37 eV   |
| Ag1Sc1Se2.ICSD.155115         | 1.25 eV    | 0.95 eV   |
| Ag1Sc1Se2.ICSD.605797         | 1.35 eV    | 1.19 eV   |
| Ag1Se1Ti1.ICSD.100710         | 0.65 eV    | 0.69 eV   |
| Ag1Se2Tb1.ICSD.605827         | 1.02 eV    | 0.96 eV   |
| Ag1Se2Y1.ICSD.605836          | 1.52 eV    | 1.30 eV   |
| Ag1Tb1Te2.ICSD.154793         | 0.88 eV    | 0.85 eV   |
| Ag1Te1Ti1.ICSD.52609          | 0.76 eV    | 0.56 eV   |
| Ag1Te2Ti3.ICSD.61680          | 0.59 eV    | 0.58 eV   |
| Ag1Te2Y1.ICSD.154792          | 0.87 eV    | 0.73 eV   |
| Ag2.67Cr1I10.67O4.ICSD.419833 | 2.08 eV    | 1.79 eV   |
| Ag2As1Cs1S3.ICSD.421091       | 1.98 eV    | 1.80 eV   |
| Ag2As1K1O4.ICSD.409793        | 1.01 eV    | 1.43 eV   |
| Ag2As4Hg7I6.ICSD.391132       | 0.74 eV    | 0.92 eV   |
| Ag2Ba1Ge1S4.ICSD.10040        | 1.01 eV    | 1.15 eV   |
| Ag2Ba1Ge1Se4.ICSD.411405      | 0.37 eV    | 0.77 eV   |
| Ag2Ba1Hg2O4.ICSD.40835        | 1.78 eV    | 1.35 eV   |
| Ag2Ba1Mn1O8V2.ICSD.408193     | 2.63 eV    | 1.99 eV   |
| Ag2Ba1S2.ICSD.50183           | 1.35 eV    | 1.31 eV   |
| Ag2Ba1S4Sn1.ICSD.41898        | 0.61 eV    | 0.92 eV   |
| Ag2Ba1Se4Sn1.ICSD.170856      | 0.24 eV    | 0.61 eV   |
| Ag2Ba1Te2.ICSD.246048         | 1.02 eV    | 0.83 eV   |
| Ag2Bi1O3.ICSD.415959          | 0.66 eV    | 0.78 eV   |
| Ag2Br14W6.ICSD.410959         | 2.80 eV    | 2.24 eV   |
| Ag2Br1N1O3.ICSD.1311          | 2.40 eV    | 2.25 eV   |
| Ag2Br6Hg7P8.ICSD.171256       | 1.01 eV    | 1.21 eV   |
| Ag2C1Cl1N1O4S1.ICSD.410623    | 3.18 eV    | 2.52 eV   |
| Ag2C1N2.ICSD.411091           | 1.23 eV    | 1.82 eV   |
| Ag2C1O3.ICSD.281040           | 0.92 eV    | 1.45 eV   |
| Ag2C1O3.ICSD.93988            | 1.13 eV    | 1.67 eV   |
| Ag2C2O4.ICSD.109603           | 3.11 eV    | 2.23 eV   |
| Ag2C4Cs1Cu1N4.ICSD.415572     | 2.69 eV    | 2.72 eV   |
| Ag2C4Cu1K1N4.ICSD.415570      | 2.62 eV    | 2.76 eV   |
| Ag2C4Cu1N4Rb1.ICSD.415571     | 2.67 eV    | 2.77 eV   |
| Ag2C4N4S4Zn1.ICSD.71563       | 3.28 eV    | 2.71 eV   |
| Ag2C4O4.ICSD.109770           | 0.92 eV    | 1.93 eV   |
| Ag2Ca1O12V4.ICSD.161369       | 2.62 eV    | 2.47 eV   |
| Ag2Cd1Ge1S4.ICSD.152753       | 0.98 eV    | 1.05 eV   |
| Ag2Cd1Ge1S4.ICSD.423404       | 1.27 eV    | 1.16 eV   |
| Ag2Cl1N1O3.ICSD.8013          | 2.49 eV    | 2.41 eV   |
| Ag2Cl4Pd1.ICSD.65239          | 1.88 eV    | 1.60 eV   |

Supplementary Table 613. Five-fold cross validated predictions for the band gap energy (7/277).

| system                     | calculated | predicted |
|----------------------------|------------|-----------|
| Ag2Cl6Re1.ICSD.156662      | 2.04 eV    | 1.89 eV   |
| Ag2Cr1O4.ICSD.16298        | 2.17 eV    | 1.95 eV   |
| Ag2Cr2O7.ICSD.2433         | 2.09 eV    | 1.87 eV   |
| Ag2Cs2S4Ti1.ICSD.280645    | 1.99 eV    | 1.76 eV   |
| Ag2F14Zn1Zr2.ICSD.422839   | 1.35 eV    | 2.78 eV   |
| Ag2F1H2I1O1.ICSD.32660     | 2.16 eV    | 1.90 eV   |
| Ag2F5.ICSD.95832           | 0.88 eV    | 0.96 eV   |
| Ag2Fe1S4Sn1.ICSD.42534     | 0.56 eV    | 0.61 eV   |
| Ag2Ge1In2S6.ICSD.159759    | 1.38 eV    | 1.27 eV   |
| Ag2Ge1In2Se6.ICSD.88168    | 0.78 eV    | 0.75 eV   |
| Ag2Ge1K2S4.ICSD.170843     | 1.89 eV    | 1.92 eV   |
| Ag2Ge1O3.ICSD.167332       | 0.58 eV    | 0.78 eV   |
| Ag2Ge1Pb1S4.ICSD.180802    | 1.59 eV    | 1.20 eV   |
| Ag2Ge1Rb2S4.ICSD.170844    | 2.15 eV    | 1.80 eV   |
| Ag2Ge1S3.ICSD.41711        | 0.99 eV    | 1.13 eV   |
| Ag2H12N4O4S1.ICSD.36585    | 3.37 eV    | 2.94 eV   |
| Ag2H1O4P1.ICSD.30503       | 1.97 eV    | 2.04 eV   |
| Ag2H3I1O6.ICSD.155415      | 1.31 eV    | 1.65 eV   |
| Ag2H4O12S3.ICSD.408949     | 3.95 eV    | 3.28 eV   |
| Ag2H6N2O6Pd1S2.ICSD.280075 | 2.31 eV    | 2.16 eV   |
| Ag2Hf1S3.ICSD.79251        | 1.40 eV    | 1.50 eV   |
| Ag2Hg1I2S1.ICSD.413300     | 1.69 eV    | 1.52 eV   |
| Ag2Hg1I4.ICSD.30264        | 1.36 eV    | 1.27 eV   |
| Ag2Hg1I4.ICSD.6069         | 1.51 eV    | 1.36 eV   |
| Ag2Hg1O2.ICSD.280333       | 0.78 eV    | 0.89 eV   |
| Ag2Hg1S2.ICSD.201713       | 0.70 eV    | 0.93 eV   |
| Ag2Hg2O12Te3.ICSD.171006   | 0.74 eV    | 1.52 eV   |
| Ag2Hg7I6P8.ICSD.171257     | 0.89 eV    | 1.08 eV   |
| Ag2I10Ti6.ICSD.35389       | 1.29 eV    | 1.73 eV   |
| Ag2I1N1O3.ICSD.8075        | 2.19 eV    | 2.14 eV   |
| Ag2I6O18Ti1.ICSD.420852    | 2.99 eV    | 2.28 eV   |
| Ag2In2S6Si1.ICSD.189391    | 1.42 eV    | 1.31 eV   |
| Ag2In2Se6Si1.ICSD.154635   | 0.81 eV    | 0.85 eV   |
| Ag2K1Nb1Se4.ICSD.412479    | 1.66 eV    | 1.31 eV   |
| Ag2K1P1S4.ICSD.420033      | 1.60 eV    | 1.76 eV   |
| Ag2K1S3Sb1.ICSD.420015     | 2.03 eV    | 1.50 eV   |
| Ag2K1S4Sb1.ICSD.82143      | 0.81 eV    | 1.19 eV   |
| Ag2K1Se4Ta1.ICSD.412477    | 1.90 eV    | 1.52 eV   |
| Ag2K2Se4Sn1.ICSD.90119     | 0.89 eV    | 1.08 eV   |
| Ag2Mn1O8Sr1V2.ICSD.408052  | 2.25 eV    | 2.10 eV   |
| Ag2Mo1O12Te4.ICSD.420406   | 2.40 eV    | 2.26 eV   |
| Ag2Mo1O4.ICSD.36187        | 2.73 eV    | 2.27 eV   |
| Ag2Mo2O7.ICSD.31027        | 2.59 eV    | 2.33 eV   |
| Ag2Mo3O16Te3.ICSD.420405   | 2.15 eV    | 2.41 eV   |
| Ag2Nb4O11.ICSD.180731      | 2.83 eV    | 2.78 eV   |
| Ag2Nb4O11.ICSD.180733      | 2.86 eV    | 2.75 eV   |
| Ag2O10U1W2.ICSD.98550      | 2.29 eV    | 2.46 eV   |
| Ag2O11Ta4.ICSD.180734      | 3.16 eV    | 2.61 eV   |
| Ag2O11V4.ICSD.93453        | 1.45 eV    | 1.92 eV   |
| Ag2O12Sr1V4.ICSD.161371    | 2.79 eV    | 2.44 eV   |

Supplementary Table 614. Five-fold cross validated predictions for the band gap energy (8/277).

| system                     | calculated | predicted |
|----------------------------|------------|-----------|
| Ag2O12U2V2.ICSD_81576      | 2.60 eV    | 2.25 eV   |
| Ag2O2Pd1.ICSD_51499        | 0.33 eV    | 0.68 eV   |
| Ag2O3S1.ICSD_4433          | 2.91 eV    | 1.63 eV   |
| Ag2O3Se1.ICSD_78388        | 2.55 eV    | 1.73 eV   |
| Ag2O3Si1.ICSD_36589        | 1.29 eV    | 1.42 eV   |
| Ag2O3Ti1.ICSD_84970        | 1.71 eV    | 1.49 eV   |
| Ag2O3.ICSD_59193           | 0.40 eV    | 0.66 eV   |
| Ag2O4S1.ICSD_69096         | 2.21 eV    | 2.06 eV   |
| Ag2O4Se1.ICSD_413089       | 1.38 eV    | 1.51 eV   |
| Ag2O4Te1.ICSD_414464       | 0.48 eV    | 1.08 eV   |
| Ag2O6P1V1.ICSD_73580       | 2.18 eV    | 2.09 eV   |
| Ag2O6Te2.ICSD_415472       | 1.52 eV    | 1.53 eV   |
| Ag2O6Te2.ICSD_417354       | 1.83 eV    | 1.61 eV   |
| Ag2O7P2Pb1.ICSD_93967      | 3.08 eV    | 2.27 eV   |
| Ag2O7P2Zn1.ICSD_90917      | 2.97 eV    | 2.69 eV   |
| Ag2O7S2.ICSD_423166        | 3.23 eV    | 2.53 eV   |
| Ag2O7W2.ICSD_31028         | 2.73 eV    | 2.35 eV   |
| Ag2P2S11Ti2.ICSD_84606     | 1.22 eV    | 1.47 eV   |
| Ag2Rb1S4Sb1.ICSD_82145     | 1.11 eV    | 1.37 eV   |
| Ag2S1.ICSD_262637          | 0.39 eV    | 0.81 eV   |
| Ag2S1.ICSD_98452           | 1.35 eV    | 0.96 eV   |
| Ag2S1.ICSD_98453           | 0.92 eV    | 1.07 eV   |
| Ag2S3Si1.ICSD_180764       | 1.82 eV    | 1.57 eV   |
| Ag2S3Te1.ICSD_85135        | 1.55 eV    | 1.17 eV   |
| Ag2S4Sn1Zn1.ICSD_605734    | 0.47 eV    | 0.71 eV   |
| Ag3As1O4.ICSD_35545        | 0.43 eV    | 1.12 eV   |
| Ag3As1S3.ICSD_36352        | 2.04 eV    | 1.32 eV   |
| Ag3As1S3.ICSD_419203       | 1.41 eV    | 1.38 eV   |
| Ag3As1S4.ICSD_86227        | 0.87 eV    | 1.29 eV   |
| Ag3As1Se3.ICSD_76519       | 0.92 eV    | 0.84 eV   |
| Ag3As1Se3.ICSD_82636       | 1.24 eV    | 1.01 eV   |
| Ag3As2K3.ICSD_32016        | 1.36 eV    | 0.90 eV   |
| Ag3Au1S2.ICSD_15732        | 0.64 eV    | 0.83 eV   |
| Ag3Au1Se2.ICSD_171959      | 0.42 eV    | 0.63 eV   |
| Ag3Au1Te2.ICSD_15733       | 0.58 eV    | 0.47 eV   |
| Ag3B1O3.ICSD_32721         | 0.81 eV    | 0.94 eV   |
| Ag3Br1S1.ICSD_174097       | 0.82 eV    | 1.00 eV   |
| Ag3C1N3O6S1.ICSD_23513     | 2.61 eV    | 2.53 eV   |
| Ag3C6Cd1N6Rb1.ICSD_75503   | 3.41 eV    | 3.32 eV   |
| Ag3C6Co1N6.ICSD_16959      | 4.23 eV    | 3.41 eV   |
| Ag3C6H6La1N6O3.ICSD_170986 | 3.50 eV    | 3.07 eV   |
| Ag3C6H6N6O3Tb1.ICSD_249343 | 3.37 eV    | 3.56 eV   |
| Ag3C6K1Mn1N6.ICSD_262507   | 1.86 eV    | 2.55 eV   |
| Ag3C6K2N6Na1.ICSD_59725    | 3.43 eV    | 3.55 eV   |
| Ag3C6K2N6Na1.ICSD_65699    | 3.39 eV    | 3.53 eV   |
| Ag3Ce1K2Te4.ICSD_86678     | 0.98 eV    | 0.88 eV   |
| Ag3Co2O6Sb1.ICSD_174288    | 0.50 eV    | 0.77 eV   |
| Ag3Cs1S2.ICSD_1033         | 0.76 eV    | 0.90 eV   |
| Ag3Cs1Se5Tb2.ICSD_93684    | 1.41 eV    | 1.26 eV   |
| Ag3Cu1S2.ICSD_163982       | 0.57 eV    | 0.73 eV   |

Supplementary Table 615. Five-fold cross validated predictions for the band gap energy (9/277).

| system                  | calculated | predicted |
|-------------------------|------------|-----------|
| Ag3Cu1S2.ICSD_163983    | 0.75 eV    | 0.75 eV   |
| Ag3F14Hf2.ICSD_65178    | 1.28 eV    | 2.83 eV   |
| Ag3Fe1O8V2.ICSD_166890  | 2.01 eV    | 1.90 eV   |
| Ag3Ge3P6Sn2.ICSD_52575  | 0.31 eV    | 0.45 eV   |
| Ag3I1S1.ICSD_201004     | 0.99 eV    | 0.92 eV   |
| Ag3In1O8P2.ICSD_245001  | 1.99 eV    | 1.90 eV   |
| Ag3In2O12P3.ICSD_245002 | 2.01 eV    | 2.26 eV   |
| Ag3K1Se2.ICSD_402643    | 0.31 eV    | 0.40 eV   |
| Ag3K1Te2.ICSD_402230    | 0.55 eV    | 0.54 eV   |
| Ag3Li1O2.ICSD_4204      | 0.87 eV    | 1.01 eV   |
| Ag3N1O3S1.ICSD_25523    | 1.52 eV    | 1.58 eV   |
| Ag3N1O3Se1.ICSD_33581   | 0.55 eV    | 1.07 eV   |
| Ag3Na1O2.ICSD_9627      | 0.82 eV    | 0.94 eV   |
| Ag3Na1S2.ICSD_73198     | 1.10 eV    | 0.88 eV   |
| Ag3O4P1.ICSD_76968      | 0.87 eV    | 1.27 eV   |
| Ag3O4Ru1.ICSD_59924     | 0.89 eV    | 1.08 eV   |
| Ag3O4Sb1.ICSD_417675    | 0.24 eV    | 0.64 eV   |
| Ag3O4V1.ICSD_249417     | 1.37 eV    | 1.34 eV   |
| Ag3O4V1.ICSD_417470     | 1.47 eV    | 1.45 eV   |
| Ag3P11.ICSD_26563       | 0.91 eV    | 0.88 eV   |
| Ag3P1S4.ICSD_416585     | 1.44 eV    | 1.52 eV   |
| Ag3P1Se4.ICSD_97760     | 0.55 eV    | 0.85 eV   |
| Ag3P2S8Y1.ICSD_417658   | 2.26 eV    | 1.94 eV   |
| Ag3P6Si3Sn2.ICSD_52595  | 0.38 eV    | 0.65 eV   |
| Ag3P7Sn1.ICSD_411041    | 0.73 eV    | 0.68 eV   |
| Ag3Rb1S2.ICSD_1034      | 0.60 eV    | 0.76 eV   |
| Ag3Rb1Se2.ICSD_90795    | 0.38 eV    | 0.46 eV   |
| Ag3Rb1Se5Sm2.ICSD_91095 | 0.23 eV    | 0.87 eV   |
| Ag3Rb1Te2.ICSD_90872    | 0.62 eV    | 0.56 eV   |
| Ag3S2Ti1.ICSD_75976     | 1.11 eV    | 0.95 eV   |
| Ag3S3Sb1.ICSD_181518    | 1.31 eV    | 1.41 eV   |
| Ag3S3Sb1.ICSD_33714     | 1.84 eV    | 1.36 eV   |
| Ag3S6Sb2Ti3.ICSD_160100 | 1.61 eV    | 1.26 eV   |
| Ag4C4N4S4.ICSD_159147   | 2.60 eV    | 2.52 eV   |
| Ag4Cd1Ge2S7.ICSD_95121  | 1.06 eV    | 1.11 eV   |
| Ag4I1O4P1.ICSD_245791   | 1.28 eV    | 1.37 eV   |
| Ag4I2O4Se1.ICSD_418902  | 1.50 eV    | 1.56 eV   |
| Ag4K2S3.ICSD_863        | 0.55 eV    | 0.91 eV   |
| Ag4K2Se3.ICSD_54102     | 0.38 eV    | 0.51 eV   |
| Ag4Mn1S6Sb2.ICSD_156764 | 1.59 eV    | 1.30 eV   |
| Ag4Mn1S6Sb2.ICSD_38360  | 0.20 eV    | 0.95 eV   |
| Ag4Mn3O8.ICSD_414178    | 0.85 eV    | 1.14 eV   |
| Ag4N2O2S1.ICSD_23111    | 0.78 eV    | 1.06 eV   |
| Ag4O4S1Te1.ICSD_421880  | 1.07 eV    | 1.18 eV   |
| Ag4O4Si1.ICSD_418314    | 0.72 eV    | 0.70 eV   |
| Ag4P2S6.ICSD_24782      | 2.02 eV    | 1.71 eV   |
| Ag4P2Se6.ICSD_1727      | 1.07 eV    | 0.94 eV   |
| Ag4Rb2S3.ICSD_409727    | 0.59 eV    | 0.81 eV   |
| Ag4S8Sn3.ICSD_164435    | 0.42 eV    | 0.91 eV   |
| Ag5Ba2La1S6.ICSD_67894  | 1.66 eV    | 1.27 eV   |

Supplementary Table 616. Five-fold cross validated predictions for the band gap energy (10/277).

| system                      | calculated | predicted |
|-----------------------------|------------|-----------|
| Ag5Ba2S6Y1.ICSD.659302      | 1.68 eV    | 1.35 eV   |
| Ag5Cl2P1S4.ICSD.416587      | 1.70 eV    | 1.58 eV   |
| Ag5Cl5Hg4P8.ICSD.416360     | 1.58 eV    | 1.25 eV   |
| Ag5Cs1Se3.ICSD.90871        | 0.22 eV    | 0.71 eV   |
| Ag5O4P1Se1.ICSD.420342      | 0.81 eV    | 0.95 eV   |
| Ag5O4P1Te1.ICSD.420343      | 0.97 eV    | 0.94 eV   |
| Ag5O4Si1.ICSD.165377        | 0.92 eV    | 0.86 eV   |
| Ag5S4Sb1.ICSD.36347         | 1.05 eV    | 1.09 eV   |
| Ag6Ba1O4.ICSD.9288          | 1.06 eV    | 0.96 eV   |
| Ag6Cl1F3Mo2O7.ICSD.413082   | 2.51 eV    | 2.29 eV   |
| Ag6Ge10P12.ICSD.70055       | 0.59 eV    | 0.53 eV   |
| Ag6Ge2O7.ICSD.404356        | 0.25 eV    | 0.55 eV   |
| Ag6K2S4.ICSD.73581          | 1.53 eV    | 1.09 eV   |
| Ag6O4Sr1.ICSD.10359         | 0.95 eV    | 1.04 eV   |
| Ag6O7Si2.ICSD.404355        | 0.55 eV    | 0.71 eV   |
| Ag7As1S6.ICSD.604743        | 0.80 eV    | 1.14 eV   |
| Ag7F31Zr6.ICSD.92446        | 4.26 eV    | 2.88 eV   |
| Ag7P1S6.ICSD.601451         | 1.23 eV    | 1.20 eV   |
| Ag7P1Se6.ICSD.54055         | 0.66 eV    | 0.70 eV   |
| Ag7P3S11.ICSD.414335        | 1.70 eV    | 1.74 eV   |
| Ag8Ge1S6.ICSD.100079        | 0.82 eV    | 0.84 eV   |
| Ag8S6Si1.ICSD.1054          | 0.97 eV    | 1.00 eV   |
| Ag8S6Sn1.ICSD.42533         | 0.59 eV    | 0.64 eV   |
| Ag8S6Ti1.ICSD.95648         | 0.87 eV    | 1.12 eV   |
| Ag9Ge2I1O8.ICSD.380303      | 0.47 eV    | 0.74 eV   |
| Al10H2O16.ICSD.23651        | 4.28 eV    | 4.72 eV   |
| Al12Ca1O19.ICSD.34394       | 4.33 eV    | 4.55 eV   |
| Al12Ca1O27Si4.ICSD.91233    | 5.24 eV    | 4.95 eV   |
| Al12Ca8O24S2.ICSD.67589     | 3.72 eV    | 3.84 eV   |
| Al12Ca8O24Te2.ICSD.86156    | 3.13 eV    | 3.11 eV   |
| Al12Cd8O24S2.ICSD.78368     | 2.79 eV    | 2.77 eV   |
| Al12Cd8O24Te2.ICSD.86155    | 2.65 eV    | 2.69 eV   |
| Al12Nd4O32Pb8.ICSD.406531   | 3.00 eV    | 3.00 eV   |
| Al12O19Sr1.ICSD.2006        | 4.45 eV    | 4.49 eV   |
| Al12O24S2Sr8.ICSD.67590     | 3.34 eV    | 3.62 eV   |
| Al12O24Sr8Te2.ICSD.82609    | 2.83 eV    | 3.07 eV   |
| Al14O25Sr4.ICSD.88527       | 3.95 eV    | 4.00 eV   |
| Al1As1Cu1O5.ICSD.91551      | 1.69 eV    | 1.62 eV   |
| Al1As1F1Na1O4.ICSD.30205    | 3.46 eV    | 3.90 eV   |
| Al1As1H4O6.ICSD.170740      | 3.66 eV    | 4.01 eV   |
| Al1As1O4.ICSD.24512         | 4.26 eV    | 3.70 eV   |
| Al1As1O4.ICSD.67228         | 3.87 eV    | 3.82 eV   |
| Al1As1.ICSD.606008          | 1.50 eV    | 1.19 eV   |
| Al1As1.ICSD.67771           | 1.66 eV    | 1.18 eV   |
| Al1As2K1O7.ICSD.79711       | 3.03 eV    | 3.30 eV   |
| Al1As2K2Na1.ICSD.73280      | 1.05 eV    | 0.99 eV   |
| Al1As2Li1O7.ICSD.161498     | 3.04 eV    | 3.37 eV   |
| Al1As2Li3Mo2O14.ICSD.260199 | 2.82 eV    | 2.49 eV   |
| Al1As2Na1O7.ICSD.75142      | 2.74 eV    | 3.19 eV   |
| Al1As2Na3.ICSD.63149        | 0.90 eV    | 0.95 eV   |

Supplementary Table 617. Five-fold cross validated predictions for the band gap energy (11/277).

| system                      | calculated | predicted |
|-----------------------------|------------|-----------|
| Al1As3Ca3.ICSD.32727        | 0.72 eV    | 0.72 eV   |
| Al1As3Cl4S5.ICSD.415503     | 2.26 eV    | 2.19 eV   |
| Al1As4Ca3Na3.ICSD.402309    | 0.93 eV    | 0.82 eV   |
| Al1Au1O2.ICSD.95663         | 0.96 eV    | 1.18 eV   |
| Al1B1Ba1F2O3.ICSD.409663    | 6.00 eV    | 5.42 eV   |
| Al1B1Ba1F2O3.ICSD.91316     | 6.04 eV    | 5.45 eV   |
| Al1B1Ca1O4.ICSD.27647       | 4.71 eV    | 4.74 eV   |
| Al1B1H3Na1O10P2.ICSD.409427 | 5.78 eV    | 5.26 eV   |
| Al1B1Li2O4.ICSD.50612       | 4.84 eV    | 4.87 eV   |
| Al1B1Mg1O4.ICSD.34349       | 6.01 eV    | 5.42 eV   |
| Al1B1O3.ICSD.30538          | 5.83 eV    | 5.68 eV   |
| Al1B1O4Pb1.ICSD.98572       | 3.09 eV    | 3.31 eV   |
| Al1B2Li1O5.ICSD.51314       | 5.41 eV    | 5.36 eV   |
| Al1B2Li3O6.ICSD.51754       | 4.82 eV    | 5.03 eV   |
| Al1B3Ca1O7.ICSD.161813      | 5.39 eV    | 5.55 eV   |
| Al1Ba1F5.ICSD.37033         | 7.32 eV    | 7.05 eV   |
| Al1Ba1F5.ICSD.80565         | 7.19 eV    | 7.13 eV   |
| Al1Ba1H1Si1.ICSD.162869     | 0.69 eV    | 0.70 eV   |
| Al1Ba1La1O4.ICSD.62490      | 4.39 eV    | 3.91 eV   |
| Al1Ba2Cu2F11.ICSD.50483     | 2.51 eV    | 2.83 eV   |
| Al1Ba2In1O5.ICSD.33805      | 2.06 eV    | 2.42 eV   |
| Al1Ba3F9.ICSD.72718         | 6.58 eV    | 6.44 eV   |
| Al1Ba3H1O4.ICSD.280520      | 4.06 eV    | 3.50 eV   |
| Al1Be1H5.ICSD.156311        | 3.27 eV    | 4.19 eV   |
| Al1Be1H5.ICSD.156312        | 3.59 eV    | 4.22 eV   |
| Al1Be1La3S7.ICSD.606164     | 2.04 eV    | 1.69 eV   |
| Al1Be1Na3O8Si2.ICSD.4334    | 4.33 eV    | 4.67 eV   |
| Al1Bi1O3.ICSD.158756        | 1.53 eV    | 1.80 eV   |
| Al1Bi1O3.ICSD.185508        | 2.96 eV    | 2.31 eV   |
| Al1Bi2Br1Cl4Te2.ICSD.174525 | 0.94 eV    | 1.39 eV   |
| Al1Br1Cl4Sb2Te2.ICSD.174524 | 0.60 eV    | 1.51 eV   |
| Al1Br4Cs1.ICSD.83435        | 4.25 eV    | 3.98 eV   |
| Al1Br4Cu1.ICSD.165608       | 2.73 eV    | 2.66 eV   |
| Al1Br4Ti1.ICSD.419829       | 4.14 eV    | 3.32 eV   |
| Al1Br7Se1.ICSD.401396       | 2.17 eV    | 2.22 eV   |
| Al1C1F5O3Sr2.ICSD.201803    | 5.06 eV    | 5.66 eV   |
| Al1C1H2K1O5.ICSD.153303     | 5.08 eV    | 4.75 eV   |
| Al1C1H2Na1O5.ICSD.100140    | 5.01 eV    | 4.75 eV   |
| Al1C1O1Sc1.ICSD.419683      | 0.65 eV    | 1.52 eV   |
| Al1C8H24P1Sn2.ICSD.163054   | 3.26 eV    | 3.21 eV   |
| Al1Ca1F14Mg3Na3.ICSD.168054 | 6.84 eV    | 6.90 eV   |
| Al1Ca1F5.ICSD.171399        | 7.13 eV    | 7.24 eV   |
| Al1Ca1F5.ICSD.69563         | 7.15 eV    | 7.06 eV   |
| Al1Ca1F6Li1.ICSD.150332     | 7.65 eV    | 7.35 eV   |
| Al1Ca1F6Na1.ICSD.80542      | 7.12 eV    | 7.03 eV   |
| Al1Ca1H1O5Si1.ICSD.12127    | 5.25 eV    | 4.88 eV   |
| Al1Ca1H1Si1.ICSD.162867     | 0.37 eV    | 1.08 eV   |
| Al1Ca1H5.ICSD.156313        | 0.73 eV    | 2.58 eV   |
| Al1Ca1H5.ICSD.156314        | 3.28 eV    | 3.32 eV   |
| Al1Ca1H5.ICSD.172034        | 2.93 eV    | 3.26 eV   |

Supplementary Table 618. Five-fold cross validated predictions for the band gap energy (12/277).

| system                        | calculated | predicted |
|-------------------------------|------------|-----------|
| Al1Ca1O5Ta1.ICSD_50718        | 4.07 eV    | 3.23 eV   |
| Al1Ca1O5Ta1.ICSD_99001        | 2.68 eV    | 3.55 eV   |
| Al1Ca2Cl1F2H8O12S2.ICSD_80437 | 5.52 eV    | 5.20 eV   |
| Al1Ca2F7H2O1.ICSD_182268      | 5.44 eV    | 5.77 eV   |
| Al1Ca2F7.ICSD_100308          | 7.13 eV    | 7.21 eV   |
| Al1Ca2F9Pb1.ICSD_180336       | 5.78 eV    | 4.95 eV   |
| Al1Ca2Na5O16P4.ICSD_400310    | 4.66 eV    | 4.28 eV   |
| Al1Ca3N3.ICSD_410579          | 2.45 eV    | 1.75 eV   |
| Al1Ca3Sb3.ICSD_36363          | 0.29 eV    | 0.35 eV   |
| Al1Cd1Ce3S7.ICSD_606335       | 2.38 eV    | 2.29 eV   |
| Al1Cd1F6Na1.ICSD_80559        | 4.71 eV    | 4.71 eV   |
| Al1Cd1La3S7.ICSD_606339       | 2.32 eV    | 2.32 eV   |
| Al1Ce1H6.ICSD_247040          | 2.22 eV    | 2.17 eV   |
| Al1Ce1O3.ICSD_245264          | 0.10 eV    | 2.49 eV   |
| Al1Ce1O3.ICSD_245267          | 3.95 eV    | 3.15 eV   |
| Al1Ce1O3.ICSD_245562          | 2.97 eV    | 2.25 eV   |
| Al1Ce3Cr1S7.ICSD_606421       | 0.09 eV    | 1.14 eV   |
| Al1Ce3Mg1S7.ICSD_606475       | 2.37 eV    | 2.28 eV   |
| Al1Ce3S7V1.ICSD_606506        | 1.22 eV    | 1.07 eV   |
| Al1Ce3S7Zn1.ICSD_606507       | 2.56 eV    | 2.46 eV   |
| Al1Cl1H6O4.ICSD_425880        | 5.13 eV    | 4.76 eV   |
| Al1Cl1O1.ICSD_27812           | 2.40 eV    | 3.99 eV   |
| Al1Cl3H12O6.ICSD_22071        | 5.14 eV    | 4.81 eV   |
| Al1Cl3.ICSD_39566             | 5.27 eV    | 4.38 eV   |
| Al1Cl4Cs1.ICSD_8118           | 5.65 eV    | 5.16 eV   |
| Al1Cl4Cu1.ICSD_165607         | 3.27 eV    | 2.91 eV   |
| Al1Cl4Cu1.ICSD_35050          | 3.16 eV    | 3.10 eV   |
| Al1Cl4Ga1.ICSD_62232          | 4.01 eV    | 4.34 eV   |
| Al1Cl4In1.ICSD_170790         | 4.11 eV    | 4.01 eV   |
| Al1Cl4Li1.ICSD_35277          | 5.55 eV    | 5.21 eV   |
| Al1Cl4N1S2.ICSD_27210         | 2.11 eV    | 2.62 eV   |
| Al1Cl4Na1.ICSD_71158          | 5.15 eV    | 4.90 eV   |
| Al1Cl4Tl1.ICSD_419828         | 4.65 eV    | 4.06 eV   |
| Al1Cl6H1.ICSD_26510           | 2.26 eV    | 2.56 eV   |
| Al1Cl6I3.ICSD_26403           | 1.75 eV    | 1.67 eV   |
| Al1Cl6N1S2.ICSD_14181         | 1.67 eV    | 2.29 eV   |
| Al1Cl7S1.ICSD_35685           | 2.63 eV    | 2.47 eV   |
| Al1Cl7Se1.ICSD_9064           | 0.43 eV    | 2.14 eV   |
| Al1Cl7Te1.ICSD_26043          | 3.29 eV    | 2.75 eV   |
| Al1Cl7Te1.ICSD_59133          | 3.18 eV    | 2.75 eV   |
| Al1Cl8Nb1.ICSD_62029          | 2.28 eV    | 2.49 eV   |
| Al1Co1Dy3S7.ICSD_606550       | 1.39 eV    | 1.58 eV   |
| Al1Co1La3S7.ICSD_606601       | 1.55 eV    | 1.49 eV   |
| Al1Co1Pr3S7.ICSD_606645       | 1.51 eV    | 1.05 eV   |
| Al1Co1S7Y3.ICSD_606649        | 1.43 eV    | 1.42 eV   |
| Al1Cr1La3S7.ICSD_606794       | 0.09 eV    | 1.17 eV   |
| Al1Cs1Cu1F6.ICSD_240292       | 1.94 eV    | 2.48 eV   |
| Al1Cs1F4.ICSD_10012           | 6.95 eV    | 6.81 eV   |
| Al1Cs1H8N4.ICSD_2537          | 2.79 eV    | 3.21 eV   |
| Al1Cs1O2.ICSD_28372           | 4.49 eV    | 3.54 eV   |

Supplementary Table 619. Five-fold cross validated predictions for the band gap energy (13/277).

| system                   | calculated | predicted |
|--------------------------|------------|-----------|
| Al1Cs1O4Si1.ICSD_160822  | 1.05 eV    | 3.46 eV   |
| Al1Cs1O4Si1.ICSD_186607  | 2.73 eV    | 3.11 eV   |
| Al1Cs1O4Si1.ICSD_186610  | 3.98 eV    | 3.41 eV   |
| Al1Cs1Te3.ICSD_300180    | 1.33 eV    | 1.35 eV   |
| Al1Cs2F6Na1.ICSD_41801   | 6.67 eV    | 6.55 eV   |
| Al1Cs3Ge2O7.ICSD_412140  | 3.39 eV    | 3.18 eV   |
| Al1Cs6K3Sb4.ICSD_300152  | 0.65 eV    | 0.65 eV   |
| Al1Cs6Sb3.ICSD_300128    | 0.61 eV    | 0.61 eV   |
| Al1Cu1F6K1.ICSD_59003    | 2.16 eV    | 2.48 eV   |
| Al1Cu1O2.ICSD_32630      | 2.00 eV    | 1.74 eV   |
| Al1Cu1O2.ICSD_95661      | 2.03 eV    | 1.81 eV   |
| Al1Cu1S2.ICSD_187058     | 2.07 eV    | 1.89 eV   |
| Al1Cu1Se2.ICSD_603539    | 1.23 eV    | 1.18 eV   |
| Al1Cu1Te2.ICSD_28735     | 1.29 eV    | 0.98 eV   |
| Al1Dy3Fe1S7.ICSD_607296  | 1.64 eV    | 1.54 eV   |
| Al1Dy3Ni1S7.ICSD_607332  | 1.57 eV    | 1.48 eV   |
| Al1F1Na1O4P1.ICSD_40522  | 5.44 eV    | 5.27 eV   |
| Al1F1O4Sr3.ICSD_50736    | 4.05 eV    | 3.83 eV   |
| Al1F2Na5O8P2.ICSD_62645  | 4.68 eV    | 4.66 eV   |
| Al1F3H2O2Pb1.ICSD_79740  | 4.49 eV    | 4.01 eV   |
| Al1F3K2O4S1.ICSD_161272  | 5.78 eV    | 5.43 eV   |
| Al1F3.ICSD_130021        | 7.42 eV    | 7.55 eV   |
| Al1F3.ICSD_202681        | 7.51 eV    | 7.40 eV   |
| Al1F3.ICSD_29131         | 7.43 eV    | 7.49 eV   |
| Al1F3.ICSD_36034         | 7.64 eV    | 7.28 eV   |
| Al1F3.ICSD_72174         | 7.31 eV    | 7.37 eV   |
| Al1F3.ICSD_79816         | 7.42 eV    | 6.93 eV   |
| Al1F4H4N1.ICSD_33539     | 6.79 eV    | 6.66 eV   |
| Al1F4K1.ICSD_16413       | 6.93 eV    | 6.98 eV   |
| Al1F4K1.ICSD_166825      | 6.92 eV    | 6.92 eV   |
| Al1F4K1.ICSD_285         | 6.78 eV    | 6.66 eV   |
| Al1F4K1.ICSD_60525       | 6.89 eV    | 6.82 eV   |
| Al1F4Na1.ICSD_166361     | 6.66 eV    | 6.65 eV   |
| Al1F4Na1.ICSD_20572      | 5.78 eV    | 6.41 eV   |
| Al1F4Rb1.ICSD_54120      | 6.91 eV    | 6.98 eV   |
| Al1F4Rb1.ICSD_54123      | 6.95 eV    | 6.91 eV   |
| Al1F4Rb1.ICSD_77914      | 6.85 eV    | 6.81 eV   |
| Al1F4Tl1.ICSD_200637     | 4.26 eV    | 4.24 eV   |
| Al1F4Tl1.ICSD_202455     | 4.24 eV    | 4.12 eV   |
| Al1F5Fe1.ICSD_78012      | 3.94 eV    | 3.21 eV   |
| Al1F5H10N2O1.ICSD_201652 | 6.12 eV    | 5.97 eV   |
| Al1F5H2K2O1.ICSD_81863   | 5.98 eV    | 6.27 eV   |
| Al1F5H4Mg1O2.ICSD_411650 | 5.81 eV    | 5.70 eV   |
| Al1F5K2.ICSD_81864       | 6.29 eV    | 5.87 eV   |
| Al1F5Mn1.ICSD_73812      | 4.50 eV    | 4.49 eV   |
| Al1F5Mn1.ICSD_9912       | 4.50 eV    | 4.49 eV   |
| Al1F5Ti2.ICSD_25616      | 4.09 eV    | 3.69 eV   |
| Al1F6H12N3.ICSD_96591    | 5.73 eV    | 5.68 eV   |
| Al1F6H18N6Ru1.ICSD_91763 | 4.38 eV    | 3.49 eV   |
| Al1F6H6K1O2.ICSD_69434   | 6.93 eV    | 6.51 eV   |

Supplementary Table 620. Five-fold cross validated predictions for the band gap energy (14/277).

| system                    | calculated | predicted |
|---------------------------|------------|-----------|
| Al1F6H8N2Na1_ICSD_249157  | 6.49 eV    | 6.37 eV   |
| Al1F6K2Li1_ICSD_27672     | 7.22 eV    | 7.04 eV   |
| Al1F6K2Li1_ICSD_408553    | 7.45 eV    | 6.97 eV   |
| Al1F6K2Li1_ICSD_48149     | 7.22 eV    | 7.06 eV   |
| Al1F6K2Na1_ICSD_164216    | 6.83 eV    | 6.64 eV   |
| Al1F6K2Na1_ICSD_34201     | 6.84 eV    | 6.37 eV   |
| Al1F6K3_ICSD_262078       | 6.31 eV    | 6.73 eV   |
| Al1F6Li1Na2_ICSD_280906   | 7.07 eV    | 6.83 eV   |
| Al1F6Li1Pd1_ICSD_73132    | 2.96 eV    | 3.13 eV   |
| Al1F6Li1Sr1_ICSD_164563   | 7.33 eV    | 7.31 eV   |
| Al1F6Li1Sr1_ICSD_68905    | 7.31 eV    | 7.36 eV   |
| Al1F6Li1Yb1_ICSD_411131   | 2.63 eV    | 3.73 eV   |
| Al1F6Li3_ICSD_34672       | 7.90 eV    | 7.58 eV   |
| Al1F6Li3_ICSD_85171       | 7.60 eV    | 7.65 eV   |
| Al1F6Na1Rb2_ICSD_290318   | 6.80 eV    | 6.68 eV   |
| Al1F6Na3_ICSD_30201       | 5.74 eV    | 6.38 eV   |
| Al1F6Na3_ICSD_74210       | 5.91 eV    | 6.49 eV   |
| Al1F6Pd1Rb1_ICSD_78749    | 2.43 eV    | 3.42 eV   |
| Al1F7Mg1Na2_ICSD_33509    | 6.66 eV    | 6.69 eV   |
| Al1F7Mg1Na2_ICSD_33510    | 6.64 eV    | 6.62 eV   |
| Al1F7Mg1Na2_ICSD_33511    | 6.66 eV    | 6.67 eV   |
| Al1F7Na2Ni1_ICSD_72289    | 4.60 eV    | 3.84 eV   |
| Al1F7Na2Zn1_ICSD_400729   | 5.89 eV    | 6.11 eV   |
| Al1Fe1La3S7_ICSD_607565   | 1.99 eV    | 1.28 eV   |
| Al1Fe1O3_ICSD_203203      | 1.75 eV    | 2.28 eV   |
| Al1Fe1O5P1_ICSD_74760     | 3.32 eV    | 3.14 eV   |
| Al1Fe1S7Tb3_ICSD_607622   | 1.66 eV    | 1.52 eV   |
| Al1Fe2V1_ICSD_57832       | 0.77 eV    | 0.58 eV   |
| Al1Gd1O3_ICSD_59848       | 4.96 eV    | 4.28 eV   |
| Al1Gd3Mg1S7_ICSD_607881   | 2.34 eV    | 2.12 eV   |
| Al1Gd3Mn1S7_ICSD_607887   | 0.80 eV    | 1.26 eV   |
| Al1Gd3S7V1_ICSD_607921    | 0.88 eV    | 1.16 eV   |
| Al1Gd3S7Zn1_ICSD_607922   | 2.21 eV    | 2.18 eV   |
| Al1Ge1Li1O4_ICSD_67238    | 3.11 eV    | 3.69 eV   |
| Al1Ge1Li1_ICSD_152087     | 0.15 eV    | 0.58 eV   |
| Al1Ge1Li3O5_ICSD_72098    | 2.14 eV    | 3.24 eV   |
| Al1Ge1O5Y1_ICSD_32744     | 3.77 eV    | 3.95 eV   |
| Al1Ge2Nd1O7_ICSD_35144    | 3.14 eV    | 3.33 eV   |
| Al1H12N3O15_ICSD_96764    | 3.53 eV    | 3.35 eV   |
| Al1H12N3O15_ICSD_96765    | 3.40 eV    | 3.07 eV   |
| Al1H1O10Si4_ICSD_33924    | 5.39 eV    | 4.24 eV   |
| Al1H1O2_ICSD_166340       | 5.90 eV    | 4.91 eV   |
| Al1H1O2_ICSD_173074       | 3.91 eV    | 4.06 eV   |
| Al1H1O2_ICSD_173076       | 3.93 eV    | 4.04 eV   |
| Al1H1O2_ICSD_59609        | 5.56 eV    | 4.82 eV   |
| Al1H1O4Si1_ICSD_85555     | 0.63 eV    | 3.56 eV   |
| Al1H1Si1Sr1_ICSD_162868   | 0.61 eV    | 0.81 eV   |
| Al1H24Li1Mg10_ICSD_158274 | 3.59 eV    | 3.30 eV   |
| Al1H2Li1O5Si1_ICSD_161497 | 4.88 eV    | 4.76 eV   |
| Al1H2Na3O9P2_ICSD_84643   | 4.51 eV    | 4.55 eV   |

Supplementary Table 621. Five-fold cross validated predictions for the band gap energy (15/277).

| system                  | calculated | predicted |
|-------------------------|------------|-----------|
| Al1H3O3_ICSD_164050     | 5.09 eV    | 4.98 eV   |
| Al1H3O3_ICSD_181006     | 5.73 eV    | 5.09 eV   |
| Al1H3O3_ICSD_181008     | 5.80 eV    | 5.23 eV   |
| Al1H3O3_ICSD_240781     | 4.68 eV    | 4.89 eV   |
| Al1H3O3_ICSD_26830      | 3.63 eV    | 4.41 eV   |
| Al1H3_ICSD_15225        | 2.46 eV    | 3.08 eV   |
| Al1H3_ICSD_182534       | 3.10 eV    | 3.12 eV   |
| Al1H3_ICSD_182535       | 3.17 eV    | 3.50 eV   |
| Al1H3_ICSD_182536       | 3.23 eV    | 3.18 eV   |
| Al1H4K1O14P4_ICSD_63033 | 5.63 eV    | 5.42 eV   |
| Al1H4K1_ICSD_99082      | 5.04 eV    | 4.04 eV   |
| Al1H4K1_ICSD_99083      | 4.76 eV    | 3.88 eV   |
| Al1H4Li1_ICSD_22247     | 4.58 eV    | 4.18 eV   |
| Al1H4Na1_ICSD_165838    | 1.88 eV    | 3.70 eV   |
| Al1H4Na1_ICSD_99257     | 4.67 eV    | 3.41 eV   |
| Al1H5Mg1_ICSD_165987    | 3.28 eV    | 3.58 eV   |
| Al1H5O9P2_ICSD_34613    | 5.53 eV    | 5.39 eV   |
| Al1H5Sr1_ICSD_156315    | 3.55 eV    | 3.37 eV   |
| Al1H6I1O4_ICSD_424556   | 4.31 eV    | 3.76 eV   |
| Al1H6K2Li1_ICSD_152890  | 2.48 eV    | 2.56 eV   |
| Al1H6K2Li1_ICSD_245318  | 2.61 eV    | 2.92 eV   |
| Al1H6K3_ICSD_153683     | 1.84 eV    | 3.07 eV   |
| Al1H6K3_ICSD_153684     | 2.17 eV    | 2.32 eV   |
| Al1H6La1_ICSD_247038    | 2.18 eV    | 2.39 eV   |
| Al1H6Li1Mg1_ICSD_165986 | 3.37 eV    | 3.55 eV   |
| Al1H6Li1Na2_ICSD_152893 | 2.83 eV    | 2.54 eV   |
| Al1H6Li3_ICSD_99217     | 3.61 eV    | 4.10 eV   |
| Al1H6Nd1_ICSD_247044    | 2.01 eV    | 2.09 eV   |
| Al1H6Pr1_ICSD_247042    | 2.10 eV    | 2.08 eV   |
| Al1H8K1N4_ICSD_2538     | 2.92 eV    | 2.48 eV   |
| Al1H8N4Rb1_ICSD_40168   | 0.20 eV    | 2.26 eV   |
| Al1I3O9_ICSD_152758     | 3.33 eV    | 3.29 eV   |
| Al1I3_ICSD_391247       | 3.26 eV    | 2.57 eV   |
| Al1I4In1_ICSD_418802    | 3.00 eV    | 2.91 eV   |
| Al1I4Na1_ICSD_400521    | 3.42 eV    | 3.19 eV   |
| Al1I4Tl1_ICSD_419827    | 3.44 eV    | 3.00 eV   |
| Al1I7Te1_ICSD_401395    | 1.87 eV    | 1.85 eV   |
| Al1I8P1_ICSD_35403      | 1.47 eV    | 2.19 eV   |
| Al1In1S3_ICSD_8257      | 2.43 eV    | 2.24 eV   |
| Al1K1Mo2O8_ICSD_28018   | 3.78 eV    | 3.46 eV   |
| Al1K1O2_ICSD_151883     | 3.76 eV    | 3.89 eV   |
| Al1K1O2_ICSD_169481     | 4.00 eV    | 3.62 eV   |
| Al1K1O2_ICSD_262975     | 2.93 eV    | 3.64 eV   |
| Al1K1O4Si1_ICSD_34350   | 4.51 eV    | 4.48 eV   |
| Al1K1O4Si1_ICSD_83449   | 4.52 eV    | 4.49 eV   |
| Al1K1O7P2_ICSD_2888     | 5.31 eV    | 5.14 eV   |
| Al1K1O8S2_ICSD_6305     | 5.49 eV    | 4.94 eV   |
| Al1K1O8Si3_ICSD_83536   | 0.18 eV    | 3.19 eV   |
| Al1K1Sb4_ICSD_300157    | 0.25 eV    | 0.45 eV   |
| Al1K1Te2_ICSD_411171    | 1.89 eV    | 1.59 eV   |

Supplementary Table 622. Five-fold cross validated predictions for the band gap energy (16/277).

| system                  | calculated | predicted |
|-------------------------|------------|-----------|
| Al1K1Te2.ICSD_44703     | 1.70 eV    | 1.75 eV   |
| Al1K2Li1P2.ICSD_77275   | 1.90 eV    | 1.54 eV   |
| Al1K2Na1P2.ICSD_73279   | 1.51 eV    | 1.33 eV   |
| Al1K6Na3Sb4.ICSD_401209 | 0.75 eV    | 0.75 eV   |
| Al1La1O3.ICSD_153821    | 3.66 eV    | 3.54 eV   |
| Al1La1O3.ICSD_153830    | 3.24 eV    | 3.23 eV   |
| Al1La1O3.ICSD_153836    | 3.13 eV    | 3.17 eV   |
| Al1La1O3.ICSD_180416    | 3.29 eV    | 2.87 eV   |
| Al1La1O3.ICSD_180417    | 3.50 eV    | 3.48 eV   |
| Al1La1O3.ICSD_90549     | 3.15 eV    | 3.26 eV   |
| Al1La3Mg1S7.ICSD_608298 | 2.31 eV    | 2.36 eV   |
| Al1La3Mn1S7.ICSD_608303 | 1.87 eV    | 1.70 eV   |
| Al1La3Ni1S7.ICSD_608317 | 0.09 eV    | 1.07 eV   |
| Al1La3S7Ti1.ICSD_608322 | 1.23 eV    | 1.62 eV   |
| Al1La3S7V1.ICSD_608323  | 1.16 eV    | 1.13 eV   |
| Al1La3S7Zn1.ICSD_608324 | 2.63 eV    | 2.38 eV   |
| Al1Li1Mo2O8.ICSD_16175  | 3.54 eV    | 3.36 eV   |
| Al1Li1Na2P2.ICSD_402083 | 1.89 eV    | 1.54 eV   |
| Al1Li1O12P4.ICSD_74860  | 5.74 eV    | 5.62 eV   |
| Al1Li1O2.ICSD_23815     | 4.59 eV    | 5.00 eV   |
| Al1Li1O2.ICSD_28288     | 6.11 eV    | 5.41 eV   |
| Al1Li1O4Si1.ICSD_22011  | 4.85 eV    | 4.98 eV   |
| Al1Li1O4Si1.ICSD_22014  | 4.80 eV    | 4.88 eV   |
| Al1Li1O4Si1.ICSD_32595  | 4.85 eV    | 4.98 eV   |
| Al1Li1O4Si1.ICSD_38167  | 4.70 eV    | 4.81 eV   |
| Al1Li1O4Si1.ICSD_97909  | 5.05 eV    | 4.94 eV   |
| Al1Li1O6Si2.ICSD_158512 | 5.33 eV    | 5.13 eV   |
| Al1Li1O6Si2.ICSD_30521  | 5.40 eV    | 4.99 eV   |
| Al1Li1S2.ICSD_608360    | 4.11 eV    | 3.28 eV   |
| Al1Li1Se2.ICSD_280225   | 3.02 eV    | 2.49 eV   |
| Al1Li1Si1.ICSD_413257   | 0.17 eV    | 0.61 eV   |
| Al1Li1Te2.ICSD_162672   | 2.44 eV    | 1.92 eV   |
| Al1Li3N2.ICSD_25565     | 2.94 eV    | 2.81 eV   |
| Al1Li5O4.ICSD_1037      | 4.80 eV    | 4.64 eV   |
| Al1Li5O4.ICSD_42697     | 4.67 eV    | 4.68 eV   |
| Al1Mg1O5P1.ICSD_156822  | 5.04 eV    | 4.99 eV   |
| Al1Mn1Pr3S7.ICSD_608498 | 1.74 eV    | 1.49 eV   |
| Al1Mn1Ti2.ICSD_185877   | 0.23 eV    | 0.38 eV   |
| Al1Mo1O7V1.ICSD_280775  | 2.29 eV    | 2.77 eV   |
| Al1Mo2Na1O8.ICSD_281210 | 3.58 eV    | 3.01 eV   |
| Al1Mo2O8Ti1.ICSD_250339 | 3.78 eV    | 3.09 eV   |
| Al1Mo4S8.ICSD_36564     | 0.52 eV    | 0.53 eV   |
| Al1N1Na3O9P3.ICSD_75366 | 5.00 eV    | 4.88 eV   |
| Al1N1.ICSD_105522       | 4.43 eV    | 3.43 eV   |
| Al1N1.ICSD_163950       | 3.27 eV    | 3.10 eV   |
| Al1N1.ICSD_163951       | 3.26 eV    | 3.81 eV   |
| Al1N1.ICSD_188512       | 3.31 eV    | 4.02 eV   |
| Al1N1.ICSD_31169        | 4.06 eV    | 3.37 eV   |
| Al1Na1O2.ICSD_22216     | 4.73 eV    | 3.92 eV   |
| Al1Na1O2.ICSD_79404     | 3.82 eV    | 3.88 eV   |

Supplementary Table 623. Five-fold cross validated predictions for the band gap energy (17/277).

| system                  | calculated | predicted |
|-------------------------|------------|-----------|
| Al1Na1O4Si1.ICSD_34884  | 4.48 eV    | 4.51 eV   |
| Al1Na1O4Si1.ICSD_36324  | 4.37 eV    | 4.42 eV   |
| Al1Na1O6Si2.ICSD_162546 | 5.24 eV    | 4.83 eV   |
| Al1Na1O7P2.ICSD_400462  | 5.29 eV    | 5.23 eV   |
| Al1Na1Se2.ICSD_300173   | 2.25 eV    | 2.13 eV   |
| Al1Na1Se2.ICSD_44704    | 2.17 eV    | 2.02 eV   |
| Al1Na1Te2.ICSD_44701    | 1.28 eV    | 1.39 eV   |
| Al1Na3P2.ICSD_402081    | 1.40 eV    | 1.41 eV   |
| Al1Nb1O4.ICSD_24078     | 3.61 eV    | 3.12 eV   |
| Al1Nd1O3.ICSD_90573     | 3.70 eV    | 3.67 eV   |
| Al1Ni1Pr3S7.ICSD_608833 | 0.10 eV    | 1.00 eV   |
| Al1Ni1S7Y3.ICSD_608836  | 1.59 eV    | 1.50 eV   |
| Al1O2Rb1.ICSD_28373     | 3.38 eV    | 3.77 eV   |
| Al1O2Ti1.ICSD_29010     | 2.21 eV    | 1.94 eV   |
| Al1O3Pr1.ICSD_90566     | 3.96 eV    | 3.48 eV   |
| Al1O3Y1.ICSD_27100      | 3.50 eV    | 4.16 eV   |
| Al1O3Y1.ICSD_4115       | 5.55 eV    | 4.43 eV   |
| Al1O4P1.ICSD_158619     | 5.64 eV    | 5.57 eV   |
| Al1O4P1.ICSD_159272     | 4.96 eV    | 4.60 eV   |
| Al1O4P1.ICSD_159273     | 2.92 eV    | 4.76 eV   |
| Al1O4P1.ICSD_162670     | 4.92 eV    | 5.21 eV   |
| Al1O4P1.ICSD_24511      | 5.41 eV    | 5.04 eV   |
| Al1O4P1.ICSD_261306     | 5.30 eV    | 4.70 eV   |
| Al1O4P1.ICSD_279582     | 5.33 eV    | 5.07 eV   |
| Al1O4P1.ICSD_417475     | 5.37 eV    | 4.80 eV   |
| Al1O4P1.ICSD_50101      | 5.63 eV    | 5.60 eV   |
| Al1O4P1.ICSD_66996      | 4.67 eV    | 4.86 eV   |
| Al1O4P1.ICSD_66998      | 3.19 eV    | 4.59 eV   |
| Al1O4P1.ICSD_66999      | 4.67 eV    | 3.71 eV   |
| Al1O4P1.ICSD_9643       | 5.48 eV    | 5.17 eV   |
| Al1O4P1.ICSD_98384      | 5.48 eV    | 5.22 eV   |
| Al1O4Rb1Si1.ICSD_160823 | 3.81 eV    | 3.75 eV   |
| Al1O4Rb1Si1.ICSD_4335   | 3.49 eV    | 3.64 eV   |
| Al1O4Si1Ti1.ICSD_89722  | 3.52 eV    | 3.36 eV   |
| Al1O4Ta1.ICSD_33885     | 4.17 eV    | 3.23 eV   |
| Al1O4Ta1.ICSD_67676     | 3.46 eV    | 3.26 eV   |
| Al1O4W1.ICSD_4164       | 1.44 eV    | 2.71 eV   |
| Al1O9P3.ICSD_26759      | 5.62 eV    | 5.63 eV   |
| Al1P1S4.ICSD_15910      | 2.58 eV    | 2.48 eV   |
| Al1P1.ICSD_67770        | 1.96 eV    | 1.57 eV   |
| Al1P1.ICSD_67783        | 1.63 eV    | 1.55 eV   |
| Al1Rb6Sb3.ICSD_300217   | 0.28 eV    | 0.56 eV   |
| Al1Sb1.ICSD_609290      | 1.23 eV    | 0.85 eV   |
| Al1Sb9Yb11.ICSD_186084  | 0.61 eV    | 0.46 eV   |
| Al1Se2Ti1.ICSD_100130   | 0.57 eV    | 1.10 eV   |
| Al1Si1Te3.ICSD_75001    | 1.23 eV    | 1.22 eV   |
| Al22Na2O34.ICSD_34905   | 4.51 eV    | 4.60 eV   |
| Al2As2Cs2O7.ICSD_154363 | 3.66 eV    | 3.54 eV   |
| Al2As3K3.ICSD_60950     | 1.19 eV    | 1.03 eV   |
| Al2As4Ca3.ICSD_60161    | 1.12 eV    | 1.03 eV   |

Supplementary Table 624. Five-fold cross validated predictions for the band gap energy (18/277).

| system                        | calculated | predicted |
|-------------------------------|------------|-----------|
| Al2As4Sr3.ICSD.423787         | 1.15 eV    | 0.97 eV   |
| Al2B2Ba1O7.ICSD.409171        | 4.67 eV    | 4.63 eV   |
| Al2B2Ca1O7.ICSD.86785         | 4.83 eV    | 4.62 eV   |
| Al2B2Cs2O7.ICSD.423471        | 4.22 eV    | 4.12 eV   |
| Al2B2K2O7.ICSD.409420         | 4.57 eV    | 4.45 eV   |
| Al2B2Na2O7.ICSD.93389         | 4.35 eV    | 4.59 eV   |
| Al2B2O7Sr1.ICSD.89423         | 4.64 eV    | 4.65 eV   |
| Al2B2O7Sr1.ICSD.91031         | 4.70 eV    | 4.62 eV   |
| Al2Ba1Ge2O8.ICSD.1282         | 3.47 eV    | 3.37 eV   |
| Al2Ba1O4.ICSD.21080           | 3.95 eV    | 4.08 eV   |
| Al2Ba1O4.ICSD.246027          | 4.09 eV    | 3.96 eV   |
| Al2Ba1O7Sb2.ICSD.154362       | 3.42 eV    | 3.06 eV   |
| Al2Ba1S4.ICSD.35136           | 3.65 eV    | 3.22 eV   |
| Al2Ba1Te4.ICSD.41165          | 1.54 eV    | 1.45 eV   |
| Al2Ba2Ca1F14Mg1.ICSD.20393    | 7.19 eV    | 6.82 eV   |
| Al2Ba3F12.ICSD.413546         | 6.72 eV    | 6.94 eV   |
| Al2Ba3N4.ICSD.410578          | 1.57 eV    | 1.65 eV   |
| Al2Ba3O12Si3.ICSD.27386       | 3.29 eV    | 4.04 eV   |
| Al2Ba7O19Sc6.ICSD.39442       | 2.51 eV    | 3.20 eV   |
| Al2Be1O4.ICSD.34806           | 6.13 eV    | 5.60 eV   |
| Al2Be2Cl2Na8O24Si8.ICSD.34665 | 4.64 eV    | 4.70 eV   |
| Al2Be3O18Si6.ICSD.202091      | 5.32 eV    | 5.52 eV   |
| Al2Bi2Br12.ICSD.414262        | 2.59 eV    | 2.45 eV   |
| Al2Bi2Cl12.ICSD.414261        | 3.83 eV    | 3.20 eV   |
| Al2Br6N2S2.ICSD.38378         | 1.64 eV    | 1.87 eV   |
| Al2Br6N2Se2.ICSD.82802        | 0.28 eV    | 1.68 eV   |
| Al2Br6.ICSD.83433             | 3.14 eV    | 3.67 eV   |
| Al2Br6.ICSD.83434             | 3.90 eV    | 3.44 eV   |
| Al2Br7K1.ICSD.2592            | 4.11 eV    | 3.78 eV   |
| Al2Br8Ti1.ICSD.39243          | 2.97 eV    | 2.75 eV   |
| Al2Br8Ti1.ICSD.40904          | 2.92 eV    | 2.73 eV   |
| Al2C2Mg1.ICSD.85739           | 1.75 eV    | 1.05 eV   |
| Al2C6H22O2Si2.ICSD.172440     | 5.03 eV    | 4.42 eV   |
| Al2Ca1Cl8.ICSD.56730          | 5.42 eV    | 4.56 eV   |
| Al2Ca1H4O10Si2.ICSD.80837     | 5.12 eV    | 4.77 eV   |
| Al2Ca1H6O13Si3.ICSD.30967     | 5.03 eV    | 4.84 eV   |
| Al2Ca1H8.ICSD.246482          | 4.52 eV    | 3.12 eV   |
| Al2Ca1O4.ICSD.172780          | 4.98 eV    | 4.38 eV   |
| Al2Ca1O4.ICSD.41661           | 4.38 eV    | 4.39 eV   |
| Al2Ca1S4.ICSD.46016           | 3.53 eV    | 3.07 eV   |
| Al2Ca2Fe1H1O13Si3.ICSD.63661  | 2.31 eV    | 2.11 eV   |
| Al2Ca2H1Mn1O13Si3.ICSD.26354  | 1.09 eV    | 2.32 eV   |
| Al2Ca2O7Si1.ICSD.24588        | 4.29 eV    | 4.24 eV   |
| Al2Ca2O9Sn2.ICSD.260890       | 2.44 eV    | 2.92 eV   |
| Al2Ca3F14Na2.ICSD.202657      | 7.11 eV    | 7.03 eV   |
| Al2Ca3F8H6O8S1.ICSD.31248     | 5.73 eV    | 5.70 eV   |
| Al2Ca3H12O12.ICSD.34227       | 4.11 eV    | 4.32 eV   |
| Al2Ca3N4.ICSD.280347          | 2.24 eV    | 2.25 eV   |
| Al2Ca3N4.ICSD.280348          | 2.19 eV    | 2.19 eV   |
| Al2Ca3N4.ICSD.280349          | 2.54 eV    | 2.20 eV   |

Supplementary Table 625. Five-fold cross validated predictions for the band gap energy (19/277).

| system                     | calculated | predicted |
|----------------------------|------------|-----------|
| Al2Ca3O12Si3.ICSD.94614    | 5.00 eV    | 4.64 eV   |
| Al2Ca5Sb6.ICSD.183853      | 0.18 eV    | 0.28 eV   |
| Al2Cd1O4.ICSD.183382       | 2.80 eV    | 2.95 eV   |
| Al2Cd1S4.ICSD.25634        | 2.78 eV    | 2.26 eV   |
| Al2Cd1S4.ICSD.43025        | 2.54 eV    | 2.55 eV   |
| Al2Cd1Se4.ICSD.174192      | 2.05 eV    | 1.66 eV   |
| Al2Cd1Se4.ICSD.51423       | 1.32 eV    | 1.50 eV   |
| Al2Cd1Te4.ICSD.25640       | 1.66 eV    | 1.43 eV   |
| Al2Cd3O12Si3.ICSD.27384    | 3.06 eV    | 3.05 eV   |
| Al2Cl10N2P2.ICSD.391165    | 3.83 eV    | 3.43 eV   |
| Al2Cl1F25Sr10.ICSD.202936  | 6.42 eV    | 6.22 eV   |
| Al2Cl1H6Li1O6.ICSD.83509   | 5.13 eV    | 4.89 eV   |
| Al2Cl2O5Sr3.ICSD.68365     | 4.21 eV    | 4.20 eV   |
| Al2Cl6O1Sn1.ICSD.411777    | 3.90 eV    | 3.26 eV   |
| Al2Cl8Co1.ICSD.22143       | 3.26 eV    | 3.02 eV   |
| Al2Cl8Cu1.ICSD.80107       | 1.27 eV    | 2.59 eV   |
| Al2Cl8Mg1.ICSD.62046       | 5.25 eV    | 4.85 eV   |
| Al2Cl8Ni1.ICSD.417872      | 2.88 eV    | 2.93 eV   |
| Al2Cl8Pd1.ICSD.15595       | 2.16 eV    | 2.79 eV   |
| Al2Cl8Te4.ICSD.10322       | 1.34 eV    | 1.89 eV   |
| Al2Cl8Ti1.ICSD.39565       | 3.16 eV    | 3.39 eV   |
| Al2Cl8V1.ICSD.415951       | 3.15 eV    | 2.85 eV   |
| Al2Co1O4.ICSD.290133       | 3.96 eV    | 3.17 eV   |
| Al2Co3O12Si3.ICSD.27383    | 3.84 eV    | 3.38 eV   |
| Al2Cs2O7Sb2.ICSD.154361    | 3.64 eV    | 3.47 eV   |
| Al2Cs2O9P2.ICSD.280275     | 4.91 eV    | 4.49 eV   |
| Al2Cs6Te6.ICSD.300181      | 2.16 eV    | 1.81 eV   |
| Al2Eu1S4.ICSD.607464       | 3.06 eV    | 2.63 eV   |
| Al2Eu1Se4.ICSD.607466      | 2.65 eV    | 1.90 eV   |
| Al2F12Li3Na3.ICSD.31110    | 7.09 eV    | 7.13 eV   |
| Al2F16Sr5.ICSD.411613      | 6.93 eV    | 6.90 eV   |
| Al2F1K4Nb11O20.ICSD.65738  | 0.65 eV    | 1.49 eV   |
| Al2F2Ge1O4.ICSD.409714     | 3.98 eV    | 4.46 eV   |
| Al2F2K2O3.ICSD.421736      | 4.00 eV    | 4.54 eV   |
| Al2Fe1S4.ICSD.607619       | 1.57 eV    | 1.27 eV   |
| Al2Fe3O12Si3.ICSD.80671    | 3.33 eV    | 2.83 eV   |
| Al2Gd2O7Sr1.ICSD.33580     | 3.59 eV    | 3.49 eV   |
| Al2Ge1H2O6.ICSD.78792      | 3.83 eV    | 3.73 eV   |
| Al2Ge2O7.ICSD.201750       | 3.35 eV    | 3.50 eV   |
| Al2H12O12Sr3.ICSD.20529    | 3.88 eV    | 4.15 eV   |
| Al2H12O15Se3.ICSD.72871    | 4.77 eV    | 4.00 eV   |
| Al2H3O9P3.ICSD.74527       | 6.27 eV    | 4.25 eV   |
| Al2H4K1Ni1O14P3.ICSD.75347 | 4.06 eV    | 3.74 eV   |
| Al2H4Li2O14Si4.ICSD.88917  | 4.85 eV    | 4.61 eV   |
| Al2H4Na2O12Si3.ICSD.31309  | 4.54 eV    | 4.32 eV   |
| Al2H4O9Si2.ICSD.30996      | 3.85 eV    | 3.61 eV   |
| Al2H4O9Si2.ICSD.63192      | 2.64 eV    | 3.35 eV   |
| Al2H4O9Si2.ICSD.80083      | 3.91 eV    | 3.44 eV   |
| Al2H4O9Si2.ICSD.87771      | 1.75 eV    | 3.79 eV   |
| Al2H4O9Si2.ICSD.98133      | 4.93 eV    | 4.14 eV   |

Supplementary Table 626. Five-fold cross validated predictions for the band gap energy (20/277).

| system                    | calculated | predicted |
|---------------------------|------------|-----------|
| Al2H8Mg1_ICSD_152538      | 4.41 eV    | 3.89 eV   |
| Al2Hg1S4_ICSD_25635       | 2.02 eV    | 1.95 eV   |
| Al2Hg1S4_ICSD_608160      | 1.30 eV    | 1.82 eV   |
| Al2Hg1Se4_ICSD_25638      | 1.43 eV    | 1.07 eV   |
| Al2Hg1Se4_ICSD_608163     | 0.39 eV    | 1.07 eV   |
| Al2Hg1Te4_ICSD_25641      | 1.10 eV    | 1.23 eV   |
| Al2I12Sb2_ICSD_38253      | 2.26 eV    | 1.97 eV   |
| Al2K2O24P8_ICSD_260827    | 5.19 eV    | 5.20 eV   |
| Al2K2O7Sb2_ICSD_280310    | 3.50 eV    | 3.12 eV   |
| Al2K6O6_ICSD_74968        | 2.90 eV    | 2.68 eV   |
| Al2K6Se6_ICSD_300172      | 2.38 eV    | 2.01 eV   |
| Al2K6Te6_ICSD_300168      | 2.15 eV    | 1.71 eV   |
| Al2Mg1O4_ICSD_161057      | 4.85 eV    | 4.33 eV   |
| Al2Mg1O4_ICSD_182859      | 5.11 eV    | 5.01 eV   |
| Al2Mg1S4_ICSD_107308      | 2.01 eV    | 2.49 eV   |
| Al2Mg1S4_ICSD_79672       | 3.06 eV    | 3.06 eV   |
| Al2Mg1Se4_ICSD_83363      | 1.06 eV    | 1.55 eV   |
| Al2Mg2Se5_ICSD_41928      | 1.07 eV    | 1.69 eV   |
| Al2Mg3O12Si3_ICSD_24941   | 4.94 eV    | 5.04 eV   |
| Al2Mn1S4_ICSD_608509      | 1.77 eV    | 1.72 eV   |
| Al2Mn1Te4_ICSD_608538     | 1.03 eV    | 1.18 eV   |
| Al2Mn3O12Si3_ICSD_52396   | 3.57 eV    | 2.95 eV   |
| Al2N2O3Si1Sr1_ICSD_408170 | 3.71 eV    | 3.90 eV   |
| Al2N4Sr3_ICSD_74824       | 1.91 eV    | 1.89 eV   |
| Al2Na6Se6_ICSD_300166     | 0.55 eV    | 1.38 eV   |
| Al2Na6Te6_ICSD_300163     | 0.16 eV    | 1.14 eV   |
| Al2Na7Sb5_ICSD_48168      | 0.28 eV    | 0.58 eV   |
| Al2O10Rb2Si3_ICSD_180324  | 4.38 eV    | 3.96 eV   |
| Al2O12P3Rb3_ICSD_280211   | 4.42 eV    | 4.56 eV   |
| Al2O12P3Tl3_ICSD_280212   | 3.45 eV    | 3.50 eV   |
| Al2O12S3_ICSD_73249       | 6.04 eV    | 5.44 eV   |
| Al2O12Si3Sr3_ICSD_27385   | 4.44 eV    | 4.19 eV   |
| Al2O12W3_ICSD_73878       | 4.39 eV    | 3.58 eV   |
| Al2O12W3_ICSD_73879       | 4.38 eV    | 3.58 eV   |
| Al2O3_ICSD_161061         | 5.31 eV    | 4.96 eV   |
| Al2O3_ICSD_161062         | 4.25 eV    | 3.87 eV   |
| Al2O3_ICSD_169722         | 4.23 eV    | 4.83 eV   |
| Al2O3_ICSD_173014         | 2.62 eV    | 4.12 eV   |
| Al2O3_ICSD_30026          | 5.85 eV    | 4.77 eV   |
| Al2O3_ICSD_82504          | 4.46 eV    | 4.52 eV   |
| Al2O3_ICSD_84375          | 4.83 eV    | 4.72 eV   |
| Al2O4Pb1_ICSD_33532       | 3.95 eV    | 3.36 eV   |
| Al2O4Sr1_ICSD_160296      | 4.15 eV    | 4.06 eV   |
| Al2O4Sr1_ICSD_160298      | 4.06 eV    | 4.00 eV   |
| Al2O4Zn1_ICSD_94159       | 4.49 eV    | 4.14 eV   |
| Al2O5Si1_ICSD_76936       | 4.84 eV    | 5.18 eV   |
| Al2O5Si1_ICSD_85742       | 5.44 eV    | 4.90 eV   |
| Al2O5Si1_ICSD_85745       | 5.55 eV    | 5.22 eV   |
| Al2O5Si1_ICSD_85746       | 5.46 eV    | 4.52 eV   |
| Al2O5Ti1_ICSD_27681       | 3.43 eV    | 3.35 eV   |

Supplementary Table 627. Five-fold cross validated predictions for the band gap energy (21/277).

| system                    | calculated | predicted |
|---------------------------|------------|-----------|
| Al2O6Rb6_ICSD_74969       | 2.66 eV    | 2.66 eV   |
| Al2O7Rb2Sb2_ICSD_154360   | 3.59 eV    | 3.44 eV   |
| Al2O9Pb2Si2_ICSD_159977   | 2.77 eV    | 3.14 eV   |
| Al2O9Tb4_ICSD_164882      | 4.23 eV    | 4.04 eV   |
| Al2O9Y4_ICSD_51076        | 4.32 eV    | 4.06 eV   |
| Al2Os1_ICSD_58108         | 0.51 eV    | 0.55 eV   |
| Al2P4Sr3_ICSD_409134      | 1.33 eV    | 1.04 eV   |
| Al2Pb1S4_ICSD_609026      | 2.60 eV    | 2.57 eV   |
| Al2Ru1_ICSD_58156         | 0.15 eV    | 0.17 eV   |
| Al2Ru1_ICSD_609234        | 0.10 eV    | 0.21 eV   |
| Al2S3_ICSD_609250         | 2.43 eV    | 2.95 eV   |
| Al2S3_ICSD_73220          | 3.09 eV    | 2.93 eV   |
| Al2S4Sr1_ICSD_609259      | 3.90 eV    | 3.38 eV   |
| Al2S4Zn1_ICSD_609280      | 0.24 eV    | 1.90 eV   |
| Al2S4Zn1_ICSD_76278       | 2.47 eV    | 2.52 eV   |
| Al2Sb6Sr5_ICSD_62304      | 0.76 eV    | 0.50 eV   |
| Al2Se3_ICSD_14373         | 1.76 eV    | 1.84 eV   |
| Al2Se4Sr1_ICSD_49732      | 2.97 eV    | 2.38 eV   |
| Al2Se4Zn1_ICSD_25636      | 2.28 eV    | 1.84 eV   |
| Al2Se4Zn1_ICSD_609325     | 1.58 eV    | 1.60 eV   |
| Al2Te3_ICSD_406353        | 1.86 eV    | 1.57 eV   |
| Al2Te4Zn1_ICSD_25639      | 1.71 eV    | 1.57 eV   |
| Al2Te5_ICSD_78941         | 0.97 eV    | 1.12 eV   |
| Al3B4Gd1O12_ICSD_100831   | 5.23 eV    | 4.65 eV   |
| Al3B4Nd1O12_ICSD_20800    | 3.93 eV    | 3.90 eV   |
| Al3B4Nd1O12_ICSD_6175     | 3.71 eV    | 4.25 eV   |
| Al3B4O12Pr1_ICSD_160892   | 4.28 eV    | 4.07 eV   |
| Al3B4O12Y1_ICSD_20223     | 5.35 eV    | 4.88 eV   |
| Al3Bi5Cl12_ICSD_201993    | 1.82 eV    | 2.17 eV   |
| Al3Br12La1_ICSD_72281     | 3.46 eV    | 3.29 eV   |
| Al3Br12Pr1_ICSD_72282     | 2.34 eV    | 2.98 eV   |
| Al3C2O5Sc3_ICSD_420953    | 0.67 eV    | 1.70 eV   |
| Al3C3Sc1_ICSD_43477       | 0.30 eV    | 0.31 eV   |
| Al3C3Sc1_ICSD_62308       | 0.29 eV    | 0.33 eV   |
| Al3C3Tm1_ICSD_606281      | 0.13 eV    | 0.63 eV   |
| Al3Ca2H1O13Si3_ICSD_9245  | 5.04 eV    | 4.81 eV   |
| Al3Cl12Tb1_ICSD_410939    | 4.22 eV    | 3.92 eV   |
| Al3Cs2F12Na1_ICSD_646     | 6.90 eV    | 6.82 eV   |
| Al3Cu2Ni3Zr12_ICSD_166652 | 0.10 eV    | 0.38 eV   |
| Al3F12K2Na1_ICSD_40178    | 6.79 eV    | 6.89 eV   |
| Al3F12Na1Rb2_ICSD_40177   | 6.79 eV    | 6.84 eV   |
| Al3F14Na5_ICSD_26419      | 6.56 eV    | 6.72 eV   |
| Al3F19Pb5_ICSD_203224     | 5.17 eV    | 4.30 eV   |
| Al3Gd1O8Pb2_ICSD_404479   | 2.98 eV    | 3.02 eV   |
| Al3H14Na5_ICSD_246195     | 2.60 eV    | 3.41 eV   |
| Al3H6K1O14S2_ICSD_18141   | 5.49 eV    | 5.31 eV   |
| Al3Ho1O8Pb2_ICSD_67819    | 2.99 eV    | 2.99 eV   |
| Al3I1Te3_ICSD_66030       | 1.97 eV    | 1.76 eV   |
| Al3Lu1O8Pb2_ICSD_67820    | 2.99 eV    | 2.93 eV   |
| Al3Mo1_ICSD_105517        | 0.11 eV    | 0.18 eV   |

Supplementary Table 628. Five-fold cross validated predictions for the band gap energy (22/277).

| system                      | calculated | predicted |
|-----------------------------|------------|-----------|
| Al3O12Sc2Y3.ICSD_67055      | 4.27 eV    | 4.02 eV   |
| Al3O27P9.ICSD_409479        | 5.52 eV    | 5.31 eV   |
| Al4As8K12.ICSD_300121       | 0.47 eV    | 0.87 eV   |
| Al4B2Co1O10.ICSD_1975       | 3.73 eV    | 3.47 eV   |
| Al4Ba1S7.ICSD_33237         | 3.13 eV    | 3.08 eV   |
| Al4Be1Mg1O8.ICSD_36361      | 5.53 eV    | 5.40 eV   |
| Al4Bi2O9.ICSD_26807         | 2.80 eV    | 3.05 eV   |
| Al4Bi2S8.ICSD_408439        | 2.63 eV    | 2.40 eV   |
| Al4Bi2Se8.ICSD_408440       | 2.25 eV    | 1.83 eV   |
| Al4Bi4Cl16S4.ICSD_414154    | 2.84 eV    | 2.46 eV   |
| Al4Bi4Cl16Se4.ICSD_414155   | 2.60 eV    | 2.23 eV   |
| Al4Bi4Cl16Te4.ICSD_411714   | 2.15 eV    | 2.06 eV   |
| Al4C1N3O1.ICSD_409682       | 0.16 eV    | 2.78 eV   |
| Al4C1O4.ICSD_18204          | 3.82 eV    | 3.99 eV   |
| Al4C3.ICSD_606173           | 1.32 eV    | 1.16 eV   |
| Al4Ca1H2O12Si2.ICSD_34855   | 4.53 eV    | 4.79 eV   |
| Al4Ca1O7.ICSD_16191         | 4.00 eV    | 4.17 eV   |
| Al4Cl14Te4.ICSD_10323       | 1.44 eV    | 2.48 eV   |
| Al4F9K3O8P2.ICSD_79700      | 5.46 eV    | 5.35 eV   |
| Al4H1O14Ta3.ICSD_67673      | 3.51 eV    | 3.33 eV   |
| Al4H3O15P3.ICSD_6193        | 5.52 eV    | 4.82 eV   |
| Al4H6O18P6.ICSD_415615      | 1.89 eV    | 4.69 eV   |
| Al4K12P8.ICSD_300130        | 0.70 eV    | 1.23 eV   |
| Al4La17N33Si9.ICSD_416358   | 1.41 eV    | 1.91 eV   |
| Al4Mg2O18Si5.ICSD_86347     | 4.82 eV    | 5.07 eV   |
| Al4Mn13O28Sb2Si2.ICSD_12137 | 1.10 eV    | 1.43 eV   |
| Al4Na4P12Sr8.ICSD_409319    | 0.31 eV    | 0.90 eV   |
| Al4O15Sr6Y2.ICSD_262993     | 4.01 eV    | 3.85 eV   |
| Al4O7Sr1.ICSD_16751         | 3.73 eV    | 3.76 eV   |
| Al4O7Sr1.ICSD_34803         | 3.24 eV    | 3.81 eV   |
| Al5B1O9.ICSD_167310         | 4.94 eV    | 5.18 eV   |
| Al5C3N1.ICSD_14398          | 0.82 eV    | 1.30 eV   |
| Al5C3N1.ICSD_36303          | 1.44 eV    | 0.96 eV   |
| Al5Er3O12.ICSD_170147       | 4.76 eV    | 4.52 eV   |
| Al5Eu3O12.ICSD_245326       | 0.74 eV    | 1.54 eV   |
| Al5Gd3O12.ICSD_23849        | 4.11 eV    | 4.37 eV   |
| Al5Ho3O12.ICSD_33603        | 4.67 eV    | 4.65 eV   |
| Al5Lu3O12.ICSD_182354       | 5.08 eV    | 4.65 eV   |
| Al5Lu3O12.ICSD_23846        | 4.59 eV    | 5.26 eV   |
| Al5Na1O12Ti2.ICSD_15346     | 3.09 eV    | 3.31 eV   |
| Al5O12Tb3.ICSD_33602        | 4.47 eV    | 4.47 eV   |
| Al5O12Y3.ICSD_31496         | 4.50 eV    | 4.48 eV   |
| Al5O12Yb3.ICSD_170159       | 0.62 eV    | 0.43 eV   |
| Al6Br2Ge6Li8O24.ICSD_87991  | 3.65 eV    | 3.68 eV   |
| Al6Br2Ge6Na8O24.ICSD_65665  | 3.82 eV    | 3.77 eV   |
| Al6Br2Na8O24Si6.ICSD_417676 | 4.60 eV    | 4.42 eV   |
| Al6Ca4O13.ICSD_16177        | 3.64 eV    | 3.96 eV   |
| Al6Ca4O13.ICSD_245370       | 3.95 eV    | 3.74 eV   |
| Al6Ca4O16S1.ICSD_28480      | 4.67 eV    | 4.43 eV   |
| Al6Ca4O16W1.ICSD_28481      | 3.97 eV    | 3.47 eV   |

Supplementary Table 629. Five-fold cross validated predictions for the band gap energy (23/277).

| system                      | calculated | predicted |
|-----------------------------|------------|-----------|
| Al6Ca5O14.ICSD_1714         | 4.22 eV    | 4.04 eV   |
| Al6Cl2Ge6Li8O24.ICSD_87990  | 4.14 eV    | 3.85 eV   |
| Al6Cl2Ge6Na8O24.ICSD_65664  | 4.05 eV    | 3.92 eV   |
| Al6Cl2K8O24Si6.ICSD_41191   | 4.57 eV    | 4.27 eV   |
| Al6Cl2Li8O24Si6.ICSD_41186  | 5.25 eV    | 5.04 eV   |
| Al6Cl2Na8O24Si6.ICSD_29443  | 4.69 eV    | 4.67 eV   |
| Al6F21Na1Rb2.ICSD_68555     | 7.00 eV    | 7.01 eV   |
| Al6Ge6I2Li8O24.ICSD_87992   | 3.14 eV    | 3.38 eV   |
| Al6Ge6I2Na8O24.ICSD_65666   | 3.35 eV    | 3.32 eV   |
| Al6I2Na8O24Si6.ICSD_68960   | 4.17 eV    | 3.80 eV   |
| Al6O11Sr2.ICSD_97713        | 4.14 eV    | 4.06 eV   |
| Al6O16S1Sr4.ICSD_28482      | 4.38 eV    | 4.23 eV   |
| Al6O16Sr4W1.ICSD_28483      | 3.61 eV    | 3.49 eV   |
| Al7S12Tl3.ICSD_72324        | 2.80 eV    | 2.49 eV   |
| Al7Te10.ICSD_62659          | 1.39 eV    | 1.68 eV   |
| Al8Be1Mg3O16.ICSD_31227     | 5.24 eV    | 5.24 eV   |
| Al8Mo3.ICSD_58002           | 0.10 eV    | 0.12 eV   |
| Al9Fe2H1O24Si4.ICSD_16769   | 3.23 eV    | 3.19 eV   |
| Ar1.ICSD_426923             | 8.46 eV    | 7.93 eV   |
| Ar1.ICSD_77918              | 8.45 eV    | 7.52 eV   |
| As1.01Ce1Se0.99.ICSD_249802 | 0.17 eV    | 0.32 eV   |
| As11Rb3.ICSD_412872         | 1.48 eV    | 0.87 eV   |
| As12Ce1Fe4.ICSD_610003      | 0.16 eV    | 0.29 eV   |
| As12Ce1Ru4.ICSD_610013      | 0.15 eV    | 0.21 eV   |
| As12Os4Th1.ICSD_611145      | 0.13 eV    | 0.37 eV   |
| As14Ba3.ICSD_1404           | 0.10 eV    | 0.44 eV   |
| As1Au1K2S4.ICSD_85681       | 1.13 eV    | 1.57 eV   |
| As1Au1Na2.ICSD_23254        | 0.65 eV    | 0.64 eV   |
| As1B1Ba1O5.ICSD_404439      | 3.44 eV    | 3.90 eV   |
| As1B1Ba3O3.ICSD_402682      | 1.52 eV    | 1.54 eV   |
| As1B1O4.ICSD_413436         | 3.86 eV    | 4.05 eV   |
| As1B1O4.ICSD_413438         | 4.28 eV    | 4.01 eV   |
| As1B1O5Pb1.ICSD_404328      | 3.38 eV    | 3.36 eV   |
| As1B1.ICSD_181292           | 1.20 eV    | 1.00 eV   |
| As1B2P1.ICSD_181293         | 1.06 eV    | 1.30 eV   |
| As1B6.ICSD_68151            | 2.66 eV    | 1.76 eV   |
| As1Ba1Li1.ICSD_56445        | 0.59 eV    | 0.67 eV   |
| As1Ba1O6V1.ICSD_83629       | 2.67 eV    | 2.72 eV   |
| As1Be1Cs1O4.ICSD_74027      | 3.88 eV    | 3.73 eV   |
| As1Be1Li1.ICSD_100004       | 1.00 eV    | 0.78 eV   |
| As1Be1Na1.ICSD_100091       | 1.28 eV    | 0.90 eV   |
| As1Bi1Ca2O6.ICSD_91475      | 3.23 eV    | 2.75 eV   |
| As1Bi1Mg2O6.ICSD_73895      | 3.37 eV    | 3.10 eV   |
| As1Bi1Mn1O5.ICSD_59721      | 2.44 eV    | 1.85 eV   |
| As1Bi1Ni1O5.ICSD_92916      | 2.84 eV    | 2.13 eV   |
| As1Bi1O4.ICSD_27199         | 1.76 eV    | 2.61 eV   |
| As1Bi1O4.ICSD_30636         | 2.74 eV    | 1.95 eV   |
| As1Bi1O5Pb1.ICSD_419124     | 2.30 eV    | 2.46 eV   |
| As1Br1Hg3O4.ICSD_411758     | 1.86 eV    | 1.88 eV   |
| As1Br1Hg3S4.ICSD_280330     | 1.52 eV    | 1.54 eV   |

Supplementary Table 630. Five-fold cross validated predictions for the band gap energy (24/277).

| system                    | calculated | predicted |
|---------------------------|------------|-----------|
| As1Br1Hg3Se4.ICSD_280331  | 1.27 eV    | 1.21 eV   |
| As1Br3Ca3.ICSD_426        | 1.67 eV    | 1.84 eV   |
| As1Br3F6S1.ICSD_202502    | 2.51 eV    | 2.35 eV   |
| As1Br3F6Te1.ICSD_200689   | 3.08 eV    | 2.34 eV   |
| As1Br3F6.ICSD_33811       | 1.61 eV    | 2.13 eV   |
| As1Br3.ICSD_26774         | 3.07 eV    | 2.74 eV   |
| As1C1Cl2F9S1.ICSD_60141   | 3.81 eV    | 3.75 eV   |
| As1C1F11N2S3.ICSD_81839   | 3.26 eV    | 3.62 eV   |
| As1C1F5N2O1S2.ICSD_16422  | 2.83 eV    | 3.24 eV   |
| As1C1F6H5O1.ICSD_408996   | 5.02 eV    | 4.50 eV   |
| As1C1F9H3N1O1.ICSD_41317  | 4.74 eV    | 3.91 eV   |
| As1C2Cs1H6Se2.ICSD_171201 | 2.23 eV    | 2.60 eV   |
| As1C2F6H5O2.ICSD_407344   | 3.06 eV    | 4.12 eV   |
| As1C2F6N1O2.ICSD_410737   | 4.64 eV    | 4.08 eV   |
| As1C3H10I1.ICSD_171203    | 3.58 eV    | 3.18 eV   |
| As1C3H6N1.ICSD_170721     | 4.37 eV    | 3.93 eV   |
| As1C3N3.ICSD_35330        | 4.23 eV    | 3.99 eV   |
| As1Ca1Co1H1O5.ICSD_240725 | 2.38 eV    | 2.72 eV   |
| As1Ca1Cu1.ICSD_49741      | 0.15 eV    | 0.32 eV   |
| As1Ca1F1Mg1O4.ICSD_26000  | 3.91 eV    | 3.85 eV   |
| As1Ca1F1Mg1O4.ICSD_56862  | 3.93 eV    | 3.95 eV   |
| As1Ca1H1Ni1O5.ICSD_202422 | 2.33 eV    | 2.43 eV   |
| As1Ca1H1O5Zn1.ICSD_63285  | 3.10 eV    | 3.38 eV   |
| As1Ca1Na1O4.ICSD_262123   | 3.59 eV    | 3.51 eV   |
| As1Ca1Rb1.ICSD_409177     | 1.31 eV    | 0.99 eV   |
| As1Ca2Cl1O4.ICSD_26234    | 3.79 eV    | 3.85 eV   |
| As1Ca2F13H4.ICSD_415156   | 4.80 eV    | 5.57 eV   |
| As1Ca2I1.ICSD_65218       | 1.55 eV    | 1.66 eV   |
| As1Ca2.ICSD_166865        | 0.21 eV    | 0.53 eV   |
| As1Ca3Cl3.ICSD_36002      | 1.84 eV    | 2.04 eV   |
| As1Ca3N1.ICSD_56968       | 0.72 eV    | 0.73 eV   |
| As1Ca3N1.ICSD_657356      | 0.86 eV    | 0.83 eV   |
| As1Cd1Ce1O1.ICSD_88268    | 1.12 eV    | 0.71 eV   |
| As1Cd1K1.ICSD_609963      | 0.26 eV    | 0.59 eV   |
| As1Cd1.ICSD_432           | 0.17 eV    | 0.13 eV   |
| As1Cd2Cl2.ICSD_26013      | 1.02 eV    | 1.30 eV   |
| As1Cd2F1O4.ICSD_202983    | 1.83 eV    | 2.30 eV   |
| As1Cd3Cl3.ICSD_23306      | 1.48 eV    | 1.41 eV   |
| As1Ce1F1O4.ICSD_166934    | 2.02 eV    | 2.98 eV   |
| As1Ce1O4.ICSD_280982      | 0.82 eV    | 2.14 eV   |
| As1Cl13Nb1P1.ICSD_25110   | 2.55 eV    | 2.45 eV   |
| As1Cl13P1Sb1.ICSD_25109   | 2.12 eV    | 1.75 eV   |
| As1Cl13P1Ta1.ICSD_25111   | 2.58 eV    | 2.33 eV   |
| As1Cl1Co2O4.ICSD_902      | 2.91 eV    | 2.39 eV   |
| As1Cl1Cu2O4.ICSD_901      | 1.09 eV    | 1.13 eV   |
| As1Cl1Hg3O4.ICSD_411757   | 2.06 eV    | 1.93 eV   |
| As1Cl1Hg3S4.ICSD_280329   | 1.56 eV    | 1.57 eV   |
| As1Cl1O2Pb1.ICSD_66246    | 3.33 eV    | 3.09 eV   |
| As1Cl2Hg2.ICSD_39930      | 1.30 eV    | 1.41 eV   |
| As1Cl3F5O1P1.ICSD_82761   | 4.48 eV    | 3.47 eV   |

Supplementary Table 631. Five-fold cross validated predictions for the band gap energy (25/277).

| system                       | calculated | predicted |
|------------------------------|------------|-----------|
| As1Cl3F6S1.ICSD_60076        | 3.77 eV    | 3.44 eV   |
| As1Cl3F6Se1.ICSD_66843       | 3.72 eV    | 2.99 eV   |
| As1Cl3.ICSD_35133            | 4.01 eV    | 2.97 eV   |
| As1Cl5.ICSD_412103           | 1.44 eV    | 2.19 eV   |
| As1Co1Li1O4.ICSD_155305      | 2.74 eV    | 2.52 eV   |
| As1Co1S1.ICSD_36395          | 0.13 eV    | 0.59 eV   |
| As1Co1S1.ICSD_610107         | 0.87 eV    | 0.95 eV   |
| As1Co1S1.ICSD_69129          | 1.09 eV    | 0.85 eV   |
| As1Co1Se1.ICSD_41731         | 0.46 eV    | 0.69 eV   |
| As1Cr1O4.ICSD_62132          | 1.95 eV    | 1.63 eV   |
| As1Cs1F4.ICSD_413041         | 4.60 eV    | 4.80 eV   |
| As1Cs1F6.ICSD_408070         | 5.13 eV    | 5.12 eV   |
| As1Cs1H12Mg1O10.ICSD_260150  | 4.17 eV    | 3.98 eV   |
| As1Cs1O5Ti1.ICSD_280315      | 3.19 eV    | 3.25 eV   |
| As1Cs1Se2.ICSD_65299         | 1.33 eV    | 1.28 eV   |
| As1Cs2Li1O4.ICSD_36645       | 3.71 eV    | 3.52 eV   |
| As1Cs2Na1O4.ICSD_36533       | 3.52 eV    | 3.39 eV   |
| As1Cs3O4.ICSD_412392         | 3.57 eV    | 3.30 eV   |
| As1Cs3Se4.ICSD_404082        | 1.46 eV    | 1.56 eV   |
| As1Cs5P4S12.ICSD_260946      | 2.41 eV    | 2.12 eV   |
| As1Cu1F7.ICSD_413972         | 2.19 eV    | 1.95 eV   |
| As1Cu1H1O5Zn1.ICSD_160894    | 1.80 eV    | 1.55 eV   |
| As1Cu1K2.ICSD_43936          | 1.12 eV    | 1.06 eV   |
| As1Cu1Na2.ICSD_43937         | 0.87 eV    | 0.82 eV   |
| As1Cu1O4Pb1.ICSD_61677       | 1.96 eV    | 1.54 eV   |
| As1Cu1O4Ti1.ICSD_50458       | 1.19 eV    | 1.25 eV   |
| As1Cu1O4Ti2.ICSD_407563      | 1.78 eV    | 1.46 eV   |
| As1Cu1O4Ti2.ICSD_50456       | 1.59 eV    | 1.39 eV   |
| As1Cu1S1.ICSD_23826          | 0.13 eV    | 0.18 eV   |
| As1Cu1S1.ICSD_240925         | 0.14 eV    | 0.21 eV   |
| As1Cu1Se2.ICSD_42884         | 0.33 eV    | 0.60 eV   |
| As1Cu1Sr1.ICSD_107943        | 0.18 eV    | 0.33 eV   |
| As1Cu3S4.ICSD_95547          | 0.22 eV    | 0.81 eV   |
| As1Cu4K1S4.ICSD_75430        | 1.57 eV    | 1.23 eV   |
| As1Dy1O4.ICSD_16512          | 3.63 eV    | 3.57 eV   |
| As1Dy1Pd1.ICSD_656672        | 0.10 eV    | 0.12 eV   |
| As1Er1O1Zn1.ICSD_420203      | 1.12 eV    | 1.08 eV   |
| As1Eu1Na1S4.ICSD_262583      | 1.23 eV    | 1.54 eV   |
| As1F11H1N1S1Xe1.ICSD_249654  | 2.52 eV    | 2.97 eV   |
| As1F11H1N1Te1Xe1.ICSD_171447 | 2.36 eV    | 2.40 eV   |
| As1F12I1.ICSD_249129         | 0.60 eV    | 2.62 eV   |
| As1F3.ICSD_35132             | 5.16 eV    | 4.23 eV   |
| As1F5H6N2.ICSD_412507        | 2.68 eV    | 3.41 eV   |
| As1F5N4S4.ICSD_14083         | 1.75 eV    | 1.64 eV   |
| As1F5.ICSD_65477             | 4.57 eV    | 4.49 eV   |
| As1F6H2Li1O1.ICSD_59367      | 4.18 eV    | 4.47 eV   |
| As1F6H3O1.ICSD_61236         | 4.82 eV    | 4.35 eV   |
| As1F6H6Li1O3.ICSD_416608     | 3.80 eV    | 4.20 eV   |
| As1F6I1Se6.ICSD_35351        | 1.56 eV    | 1.92 eV   |
| As1F6I3.ICSD_15527           | 1.33 eV    | 1.70 eV   |

Supplementary Table 632. Five-fold cross validated predictions for the band gap energy (26/277).

| system                      | calculated | predicted |
|-----------------------------|------------|-----------|
| As1F6I5.ICSD.59115          | 1.38 eV    | 1.46 eV   |
| As1F6In1.ICSD.417952        | 3.35 eV    | 4.18 eV   |
| As1F6K1.ICSD.16663          | 4.79 eV    | 4.09 eV   |
| As1F6K1.ICSD.2362           | 4.83 eV    | 4.96 eV   |
| As1F6Li1.ICSD.74831         | 5.04 eV    | 4.60 eV   |
| As1F6N1O2.ICSD.68906        | 3.19 eV    | 2.96 eV   |
| As1F6N1S2.ICSD.62120        | 2.60 eV    | 2.81 eV   |
| As1F6N2S3.ICSD.31787        | 0.59 eV    | 1.54 eV   |
| As1F6N2S3.ICSD.4043         | 1.51 eV    | 1.59 eV   |
| As1F6Na1.ICSD.184563        | 5.08 eV    | 4.93 eV   |
| As1F6Na1.ICSD.184564        | 4.92 eV    | 4.96 eV   |
| As1F6Rb1.ICSD.408069        | 4.94 eV    | 4.96 eV   |
| As1F6Tl1.ICSD.417954        | 4.61 eV    | 3.57 eV   |
| As1F7Kr1.ICSD.279624        | 2.45 eV    | 2.70 eV   |
| As1F7Pb1.ICSD.411788        | 4.21 eV    | 3.53 eV   |
| As1F7Sn1.ICSD.816           | 3.42 eV    | 3.46 eV   |
| As1F8Sb1.ICSD.9920          | 3.87 eV    | 3.33 eV   |
| As1F9O1S1.ICSD.10193        | 3.91 eV    | 3.82 eV   |
| As1Fe1Li1O4.ICSD.245182     | 1.79 eV    | 2.15 eV   |
| As1Fe1Li1.ICSD.187132       | 0.21 eV    | 0.37 eV   |
| As1Fe1S1.ICSD.15987         | 0.13 eV    | 0.61 eV   |
| As1Fe1S1.ICSD.185809        | 0.63 eV    | 0.68 eV   |
| As1Fe1Te1.ICSD.610529       | 0.99 eV    | 0.68 eV   |
| As1Ga1O4.ICSD.33256         | 3.10 eV    | 3.06 eV   |
| As1Ga1O4.ICSD.423937        | 3.15 eV    | 3.04 eV   |
| As1Ga1.ICSD.610543          | 0.29 eV    | 0.37 eV   |
| As1Ga1.ICSD.67773           | 0.31 eV    | 0.51 eV   |
| As1Gd1O1Zn1.ICSD.420206     | 1.07 eV    | 0.98 eV   |
| As1Ge1Se1.ICSD.100828       | 1.45 eV    | 1.04 eV   |
| As1Ge1.ICSD.610598          | 0.20 eV    | 0.36 eV   |
| As1H1Hg1O5Zn1.ICSD.281591   | 1.57 eV    | 1.90 eV   |
| As1H1O4Pb1.ICSD.29552       | 2.99 eV    | 3.07 eV   |
| As1H1O5Pb1Zn1.ICSD.98385    | 3.37 eV    | 2.87 eV   |
| As1H1O5Zn2.ICSD.34868       | 2.64 eV    | 2.89 eV   |
| As1H2Li1O4.ICSD.62024       | 3.99 eV    | 3.70 eV   |
| As1H2Li1O5Zn1.ICSD.409396   | 3.43 eV    | 3.53 eV   |
| As1H2Mn1O5.ICSD.71164       | 1.39 eV    | 1.96 eV   |
| As1H36Li3N12Se4.ICSD.409539 | 1.70 eV    | 2.73 eV   |
| As1H4Na1O5.ICSD.4284        | 3.85 eV    | 3.76 eV   |
| As1H4Na1O6Zn1.ICSD.407316   | 3.10 eV    | 3.41 eV   |
| As1H6N1O4.ICSD.66206        | 4.13 eV    | 3.67 eV   |
| As1H6N1O4.ICSD.66208        | 3.39 eV    | 3.59 eV   |
| As1H6N1O4.ICSD.66210        | 3.67 eV    | 3.59 eV   |
| As1Hg3I1Se4.ICSD.280332     | 1.25 eV    | 1.15 eV   |
| As1Ho1O4.ICSD.155919        | 3.60 eV    | 3.66 eV   |
| As1Ho1Pd1.ICSD.71619        | 0.11 eV    | 0.12 eV   |
| As1I1Se1.ICSD.200799        | 1.31 eV    | 1.30 eV   |
| As1I3.ICSD.56571            | 2.21 eV    | 2.07 eV   |
| As1K1Li2.ICSD.78938         | 0.70 eV    | 0.74 eV   |
| As1K1Mg1.ICSD.610753        | 1.15 eV    | 1.10 eV   |

Supplementary Table 633. Five-fold cross validated predictions for the band gap energy (27/277).

| system                   | calculated | predicted |
|--------------------------|------------|-----------|
| As1K1Mo1O6.ICSD.203218   | 2.53 eV    | 2.65 eV   |
| As1K1Ni1O4.ICSD.63544    | 2.67 eV    | 2.52 eV   |
| As1K1O2.ICSD.413149      | 3.84 eV    | 3.53 eV   |
| As1K1O5Ti1.ICSD.75322    | 3.26 eV    | 3.09 eV   |
| As1K1S5Sn1.ICSD.281038   | 1.49 eV    | 1.41 eV   |
| As1K1Se2.ICSD.65297      | 1.57 eV    | 1.28 eV   |
| As1K1Sn1.ICSD.610765     | 0.28 eV    | 0.38 eV   |
| As1K1Zn1.ICSD.10459      | 0.46 eV    | 0.55 eV   |
| As1K1Zn1.ICSD.43985      | 0.39 eV    | 0.65 eV   |
| As1K1.ICSD.409653        | 0.68 eV    | 0.67 eV   |
| As1K3S3.ICSD.610764      | 2.60 eV    | 2.48 eV   |
| As1K3Se11Ta2.ICSD.413600 | 1.19 eV    | 1.23 eV   |
| As1K3Se3.ICSD.50492      | 2.11 eV    | 1.84 eV   |
| As1La1O1Zn1.ICSD.420204  | 0.80 eV    | 0.89 eV   |
| As1La1O3.ICSD.423416     | 2.75 eV    | 3.21 eV   |
| As1La1O4.ICSD.415338     | 2.50 eV    | 2.82 eV   |
| As1La1S1.ICSD.610779     | 0.18 eV    | 0.51 eV   |
| As1La1Te1.ICSD.280231    | 0.14 eV    | 0.33 eV   |
| As1Li1Mg1O4.ICSD.67523   | 3.46 eV    | 3.64 eV   |
| As1Li1Mg1.ICSD.107954    | 1.37 eV    | 0.73 eV   |
| As1Li1Mn1O4.ICSD.245181  | 1.73 eV    | 1.97 eV   |
| As1Li1Mo1O6.ICSD.15035   | 2.38 eV    | 2.59 eV   |
| As1Li1Mo1O6.ICSD.59822   | 2.33 eV    | 2.32 eV   |
| As1Li1Mo2O9.ICSD.170039  | 2.49 eV    | 2.55 eV   |
| As1Li1Ni1O4.ICSD.245184  | 2.71 eV    | 2.46 eV   |
| As1Li1O3.ICSD.16617      | 2.95 eV    | 3.06 eV   |
| As1Li1O3.ICSD.202862     | 3.38 eV    | 3.22 eV   |
| As1Li1O4Rb2.ICSD.36644   | 3.55 eV    | 3.54 eV   |
| As1Li1O5Ti1.ICSD.172582  | 3.28 eV    | 3.15 eV   |
| As1Li1O5V1.ICSD.90991    | 1.40 eV    | 2.11 eV   |
| As1Li1S2.ICSD.419061     | 1.05 eV    | 1.60 eV   |
| As1Li1Se2.ICSD.248116    | 0.73 eV    | 0.59 eV   |
| As1Li1Se2.ICSD.248118    | 0.35 eV    | 0.85 eV   |
| As1Li1Zn1.ICSD.74504     | 0.94 eV    | 0.51 eV   |
| As1Li1.ICSD.26472        | 0.38 eV    | 0.58 eV   |
| As1Li2Na1O4.ICSD.73200   | 3.89 eV    | 3.76 eV   |
| As1Li3O4.ICSD.75927      | 4.13 eV    | 3.86 eV   |
| As1Li3S3.ICSD.59381      | 2.28 eV    | 2.57 eV   |
| As1Li3.ICSD.26878        | 0.64 eV    | 0.79 eV   |
| As1Li3.ICSD.610785       | 0.40 eV    | 0.68 eV   |
| As1Lu1O4.ICSD.2506       | 3.43 eV    | 4.15 eV   |
| As1Mg1Na1.ICSD.610829    | 1.00 eV    | 1.07 eV   |
| As1Mn1Na1O4.ICSD.95087   | 1.81 eV    | 2.22 eV   |
| As1Mn1O4.ICSD.165271     | 0.42 eV    | 1.31 eV   |
| As1Mo1O6Rb1.ICSD.280174  | 2.43 eV    | 2.73 eV   |
| As1Na1Ni1O4.ICSD.63353   | 2.63 eV    | 2.49 eV   |
| As1Na1O2.ICSD.413148     | 3.60 eV    | 3.29 eV   |
| As1Na1O3.ICSD.16654      | 2.84 eV    | 2.91 eV   |
| As1Na1O5Ti1.ICSD.421302  | 2.82 eV    | 3.03 eV   |
| As1Na1S2.ICSD.854        | 1.38 eV    | 1.78 eV   |

Supplementary Table 634. Five-fold cross validated predictions for the band gap energy (28/277).

| system                    | calculated | predicted |
|---------------------------|------------|-----------|
| As1Na1Sr1.ICSD_402448     | 0.82 eV    | 0.79 eV   |
| As1Na1Zn1.ICSD_610979     | 0.66 eV    | 0.64 eV   |
| As1Na1.ICSD_182158        | 0.56 eV    | 0.64 eV   |
| As1Na3S3.ICSD_645         | 2.52 eV    | 2.39 eV   |
| As1Na3Se3.ICSD_50491      | 2.01 eV    | 1.86 eV   |
| As1Nb2Rb3Se11.ICSD_413598 | 1.17 eV    | 1.21 eV   |
| As1Nd1O1Zn1.ICSD_85778    | 0.82 eV    | 0.87 eV   |
| As1Nd1O4.ICSD_155918      | 3.40 eV    | 2.79 eV   |
| As1O1Y1Zn1.ICSD_420205    | 1.19 eV    | 0.93 eV   |
| As1O2Rb1.ICSD_413150      | 3.88 eV    | 3.54 eV   |
| As1O3Sb1.ICSD_37187       | 0.94 eV    | 2.21 eV   |
| As1O4P1.ICSD_31879        | 4.56 eV    | 3.59 eV   |
| As1O4Sb1.ICSD_23316       | 3.06 eV    | 2.31 eV   |
| As1O4Sc1.ICSD_155920      | 3.52 eV    | 3.32 eV   |
| As1O4Tb1.ICSD_16329       | 3.65 eV    | 3.69 eV   |
| As1O4Tb1.ICSD_200231      | 3.66 eV    | 3.51 eV   |
| As1O4Tl1Zn1.ICSD_74812    | 3.34 eV    | 2.87 eV   |
| As1O4Tl3.ICSD_407561      | 2.56 eV    | 2.06 eV   |
| As1O4Y1.ICSD_24513        | 3.66 eV    | 3.83 eV   |
| As1O5P1.ICSD_36649        | 2.01 eV    | 3.42 eV   |
| As1O5Rb1Sn1.ICSD_80977    | 1.82 eV    | 2.48 eV   |
| As1O5Rb1Ti1.ICSD_280131   | 3.25 eV    | 3.15 eV   |
| As1O5Sb1.ICSD_36650       | 1.78 eV    | 2.37 eV   |
| As1Pd1Tb1.ICSD_656671     | 0.11 eV    | 0.11 eV   |
| As1Rb1.ICSD_412594        | 0.59 eV    | 0.67 eV   |
| As1Rb3Se16.ICSD_405959    | 0.90 eV    | 1.03 eV   |
| As1Rb3Se4.ICSD_404080     | 1.19 eV    | 1.54 eV   |
| As1Ru1Te1.ICSD_611299     | 1.06 eV    | 0.66 eV   |
| As1S1.ICSD_180621         | 1.95 eV    | 1.97 eV   |
| As1S2Tl1.ICSD_658371      | 1.71 eV    | 1.54 eV   |
| As1S2.ICSD_424590         | 1.32 eV    | 1.76 eV   |
| As1S3Tl3.ICSD_611332      | 1.23 eV    | 1.19 eV   |
| As1S3Tl3.ICSD_79580       | 1.54 eV    | 1.41 eV   |
| As1S4Tl3.ICSD_61057       | 1.68 eV    | 1.66 eV   |
| As1Se3Tl3.ICSD_603666     | 0.76 eV    | 0.68 eV   |
| As1Si1.ICSD_611404        | 1.31 eV    | 1.04 eV   |
| As1Zn1.ICSD_431           | 0.50 eV    | 0.27 eV   |
| As2Au1K5.ICSD_40698       | 0.37 eV    | 0.56 eV   |
| As2B1K3.ICSD_300105       | 1.31 eV    | 1.20 eV   |
| As2B1Rb3.ICSD_402082      | 1.29 eV    | 1.17 eV   |
| As2B4Cl4.ICSD_80153       | 3.39 eV    | 2.68 eV   |
| As2Ba1Cd2.ICSD_30917      | 0.24 eV    | 0.28 eV   |
| As2Ba1Co2O8.ICSD_260062   | 2.63 eV    | 2.27 eV   |
| As2Ba1Ga2.ICSD_380478     | 1.24 eV    | 0.65 eV   |
| As2Ba1Mg2.ICSD_30916      | 1.07 eV    | 1.02 eV   |
| As2Ba1Ni2O8.ICSD_27014    | 2.71 eV    | 2.21 eV   |
| As2Ba1Zn2.ICSD_12146      | 0.33 eV    | 0.31 eV   |
| As2Ba1.ICSD_414139        | 0.42 eV    | 0.42 eV   |
| As2Ba2Cd1.ICSD_422941     | 0.41 eV    | 0.51 eV   |
| As2Ba2Ge1.ICSD_35151      | 0.53 eV    | 0.53 eV   |

Supplementary Table 635. Five-fold cross validated predictions for the band gap energy (29/277).

| system                     | calculated | predicted |
|----------------------------|------------|-----------|
| As2Ba2Mn2O1.ICSD_75454     | 0.27 eV    | 0.68 eV   |
| As2Ba2Se5.ICSD_60954       | 1.02 eV    | 0.98 eV   |
| As2Ba2Zn1.ICSD_421423      | 0.67 eV    | 0.55 eV   |
| As2Ba3O8.ICSD_404438       | 3.92 eV    | 3.41 eV   |
| As2Ba4O1.ICSD_33905        | 0.67 eV    | 0.81 eV   |
| As2Be1K4.ICSD_300111       | 0.88 eV    | 0.96 eV   |
| As2Be2Ca1.ICSD_609867      | 0.66 eV    | 0.77 eV   |
| As2Be2Mg1.ICSD_609872      | 0.41 eV    | 0.86 eV   |
| As2Br1La3O7.ICSD_421948    | 3.13 eV    | 3.20 eV   |
| As2Br2Cd2Hg2.ICSD_240354   | 1.02 eV    | 1.00 eV   |
| As2Br3Hg4.ICSD_82312       | 0.73 eV    | 0.93 eV   |
| As2Ca1Cd2.ICSD_100065      | 0.31 eV    | 0.40 eV   |
| As2Ca1Cu1O7.ICSD_82623     | 1.61 eV    | 1.50 eV   |
| As2Ca1F20Xe4.ICSD_412759   | 2.57 eV    | 2.85 eV   |
| As2Ca1H4O8.ICSD_2809       | 3.77 eV    | 3.59 eV   |
| As2Ca1H6Mn1O10.ICSD_200702 | 2.55 eV    | 2.83 eV   |
| As2Ca1Mg2.ICSD_100041      | 1.26 eV    | 1.13 eV   |
| As2Ca1O6.ICSD_77379        | 3.32 eV    | 3.22 eV   |
| As2Ca1Zn2.ICSD_609920      | 0.72 eV    | 0.53 eV   |
| As2Ca2Cd1.ICSD_422578      | 0.72 eV    | 0.58 eV   |
| As2Ca2Cd1.ICSD_422579      | 0.92 eV    | 0.71 eV   |
| As2Ca2H4Mn1O10.ICSD_156223 | 2.55 eV    | 2.43 eV   |
| As2Ca2O7.ICSD_32602        | 3.30 eV    | 3.23 eV   |
| As2Ca4O1.ICSD_68203        | 1.20 eV    | 1.22 eV   |
| As2Cd1Hg4I4.ICSD_416973    | 0.49 eV    | 1.00 eV   |
| As2Cd1K4.ICSD_300190       | 0.61 eV    | 0.64 eV   |
| As2Cd1O6.ICSD_280576       | 1.99 eV    | 2.04 eV   |
| As2Cd1Si1.ICSD_603895      | 0.46 eV    | 0.68 eV   |
| As2Cd1Sr2.ICSD_422940      | 0.58 eV    | 0.55 eV   |
| As2Cd1.ICSD_16037          | 0.22 eV    | 0.19 eV   |
| As2Cd2O7.ICSD_280579       | 1.72 eV    | 2.15 eV   |
| As2Cd2Sr1.ICSD_23249       | 0.22 eV    | 0.32 eV   |
| As2Cd4I3.ICSD_1964         | 1.20 eV    | 1.06 eV   |
| As2Ce1Li2.ICSD_32042       | 0.50 eV    | 0.51 eV   |
| As2Ce1.ICSD_609997         | 0.10 eV    | 0.13 eV   |
| As2Cl13Sb1.ICSD_26088      | 1.19 eV    | 2.03 eV   |
| As2Cl2In2O5.ICSD_422701    | 3.27 eV    | 2.93 eV   |
| As2Cl3F5O1.ICSD_82760      | 3.29 eV    | 3.53 eV   |
| As2Cl3Hg3Tl1.ICSD_411520   | 0.83 eV    | 1.11 eV   |
| As2Cl4F6.ICSD_33884        | 2.84 eV    | 3.30 eV   |
| As2Cl6O2.ICSD_411196       | 2.49 eV    | 3.01 eV   |
| As2Co1O6.ICSD_80350        | 2.23 eV    | 2.20 eV   |
| As2Co2O7.ICSD_69001        | 2.12 eV    | 2.04 eV   |
| As2Co2O8Sr1.ICSD_400764    | 2.64 eV    | 2.55 eV   |
| As2Co7O12.ICSD_403080      | 1.07 eV    | 1.40 eV   |
| As2Cs2F8O2.ICSD_6070       | 3.74 eV    | 4.06 eV   |
| As2Cs2Pd1.ICSD_69647       | 0.96 eV    | 0.83 eV   |
| As2Cs2Se9Sn1.ICSD_281267   | 0.66 eV    | 0.90 eV   |
| As2Cs2Si1.ICSD_71225       | 1.02 eV    | 0.89 eV   |
| As2Cs2Sn1.ICSD_71226       | 0.72 eV    | 0.67 eV   |

Supplementary Table 636. Five-fold cross validated predictions for the band gap energy (30/277).

| system                    | calculated | predicted |
|---------------------------|------------|-----------|
| As2Cs4Te6_ICSD_405235     | 0.80 eV    | 0.98 eV   |
| As2Cu1K5_ICSD_40699       | 0.31 eV    | 0.55 eV   |
| As2Cu1Na4O8_ICSD_63058    | 1.87 eV    | 1.65 eV   |
| As2Cu1O8Zn2_ICSD_18115    | 1.76 eV    | 1.67 eV   |
| As2Cu2O7_ICSD_162061      | 0.98 eV    | 1.03 eV   |
| As2Cu2O7_ICSD_162062      | 1.05 eV    | 1.04 eV   |
| As2Cu3K3_ICSD_32015       | 1.48 eV    | 1.01 eV   |
| As2Cu3O8_ICSD_201733      | 0.33 eV    | 0.91 eV   |
| As2Cu3O8_ICSD_24198       | 1.06 eV    | 0.98 eV   |
| As2Cu3O8_ICSD_63057       | 1.12 eV    | 0.95 eV   |
| As2Dy1K3S8_ICSD_420737    | 1.71 eV    | 1.81 eV   |
| As2Eu3S8_ICSD_249612      | 1.49 eV    | 1.42 eV   |
| As2Eu4O1_ICSD_1222        | 0.16 eV    | 0.39 eV   |
| As2F12Hg3_ICSD_9323       | 2.63 eV    | 2.01 eV   |
| As2F12Hg4_ICSD_35412      | 0.74 eV    | 2.22 eV   |
| As2F12I4S2_ICSD_14074     | 1.22 eV    | 2.18 eV   |
| As2F12Mn1O4S2_ICSD_411791 | 3.02 eV    | 3.10 eV   |
| As2F12Mn1_ICSD_83635      | 4.02 eV    | 2.65 eV   |
| As2F12N2S1Se2_ICSD_71357  | 2.26 eV    | 2.55 eV   |
| As2F12N2S3_ICSD_54159     | 2.19 eV    | 2.42 eV   |
| As2F12N2Se3_ICSD_73584    | 2.32 eV    | 2.65 eV   |
| As2F16Mg1Xe2_ICSD_281694  | 2.97 eV    | 3.14 eV   |
| As2F18Pb1Xe3_ICSD_391093  | 2.54 eV    | 2.52 eV   |
| As2F7K1_ICSD_36332        | 4.77 eV    | 4.50 eV   |
| As2F8K2O2_ICSD_9027       | 3.67 eV    | 4.17 eV   |
| As2F8O2Rb2_ICSD_9028      | 3.64 eV    | 3.90 eV   |
| As2Fe1Li1O7_ICSD_75180    | 2.40 eV    | 2.24 eV   |
| As2Fe4O11_ICSD_100442     | 1.38 eV    | 1.62 eV   |
| As2Ga1K1O7_ICSD_82391     | 2.71 eV    | 2.98 eV   |
| As2Ga1K2Li1_ICSD_401208   | 0.80 eV    | 0.84 eV   |
| As2Ga1K2Na1_ICSD_300129   | 0.84 eV    | 0.83 eV   |
| As2Ga1Li1Na2_ICSD_402111  | 0.73 eV    | 0.75 eV   |
| As2Ga1Li1O7_ICSD_161500   | 2.57 eV    | 2.98 eV   |
| As2Ge1K2_ICSD_71222       | 0.82 eV    | 0.79 eV   |
| As2Ge1Mg1_ICSD_182368     | 0.55 eV    | 0.82 eV   |
| As2Ge1Te4_ICSD_68111      | 0.24 eV    | 0.33 eV   |
| As2Ge1_ICSD_23872         | 0.51 eV    | 0.36 eV   |
| As2Ge2Te5_ICSD_68112      | 0.34 eV    | 0.31 eV   |
| As2Ge3Te6_ICSD_68113      | 0.34 eV    | 0.31 eV   |
| As2Ge4Te7_ICSD_68114      | 0.29 eV    | 0.32 eV   |
| As2Ge5Te8_ICSD_63174      | 0.24 eV    | 0.30 eV   |
| As2H16O16Zn3_ICSD_100492  | 3.62 eV    | 3.26 eV   |
| As2H2K1O8Sc1_ICSD_59820   | 3.84 eV    | 3.71 eV   |
| As2H3Li1O7_ICSD_172988    | 1.96 eV    | 2.79 eV   |
| As2H4O9Ti1_ICSD_86771     | 3.28 eV    | 3.32 eV   |
| As2H4O9V1_ICSD_69585      | 2.29 eV    | 2.11 eV   |
| As2H6O11U1_ICSD_411217    | 3.42 eV    | 2.88 eV   |
| As2H8O12Zn3_ICSD_290615   | 3.26 eV    | 3.36 eV   |
| As2Hg1K4_ICSD_402573      | 0.71 eV    | 0.75 eV   |
| As2Hg1O6_ICSD_409490      | 0.74 eV    | 1.18 eV   |

Supplementary Table 637. Five-fold cross validated predictions for the band gap energy (31/277).

| system                     | calculated | predicted |
|----------------------------|------------|-----------|
| As2Hg2O6_ICSD_411230       | 1.24 eV    | 1.50 eV   |
| As2Hg3O8_ICSD_72527        | 1.00 eV    | 1.19 eV   |
| As2Hg4I3_ICSD_67227        | 0.69 eV    | 0.68 eV   |
| As2Hg4O7_ICSD_391228       | 1.15 eV    | 1.33 eV   |
| As2Hg6O8_ICSD_2604         | 0.49 eV    | 1.24 eV   |
| As2In1K2Li1_ICSD_402147    | 0.65 eV    | 0.79 eV   |
| As2Ir1_ICSD_610739         | 0.74 eV    | 0.57 eV   |
| As2K2Ni1_ICSD_300120       | 0.78 eV    | 0.92 eV   |
| As2K2Pd1_ICSD_32009        | 0.93 eV    | 0.87 eV   |
| As2K2Pt1_ICSD_610762       | 0.66 eV    | 0.76 eV   |
| As2K2S6Sn1_ICSD_281039     | 1.78 eV    | 1.43 eV   |
| As2K2Si1_ICSD_40426        | 1.00 eV    | 1.01 eV   |
| As2K3La1O8_ICSD_421979     | 3.75 eV    | 3.49 eV   |
| As2K3Nb1O9_ICSD_202980     | 3.49 eV    | 3.16 eV   |
| As2K3Nd1S8_ICSD_240365     | 1.68 eV    | 1.77 eV   |
| As2K4Zn1_ICSD_409919       | 0.71 eV    | 0.70 eV   |
| As2La1_ICSD_280294         | 0.50 eV    | 0.23 eV   |
| As2La1_ICSD_610769         | 0.12 eV    | 0.23 eV   |
| As2Li1O7Sc1_ICSD_161499    | 3.42 eV    | 3.46 eV   |
| As2Li3Nd1_ICSD_49626       | 0.15 eV    | 0.34 eV   |
| As2Mg1Si1_ICSD_182367      | 1.26 eV    | 1.07 eV   |
| As2Mg2O7_ICSD_16885        | 3.05 eV    | 3.31 eV   |
| As2Mg2Sr1_ICSD_610831      | 1.34 eV    | 1.16 eV   |
| As2Mg3_ICSD_24485          | 0.54 eV    | 1.06 eV   |
| As2Mg3_ICSD_25504          | 0.90 eV    | 1.13 eV   |
| As2Mg3_ICSD_610824         | 1.44 eV    | 1.01 eV   |
| As2Mn1O6_ICSD_80351        | 1.75 eV    | 1.72 eV   |
| As2Mn1S5Ti2_ICSD_17035     | 1.46 eV    | 1.47 eV   |
| As2Mn2O7_ICSD_69003        | 1.27 eV    | 1.33 eV   |
| As2Mo2O12Sr1_ICSD_87794    | 2.57 eV    | 2.47 eV   |
| As2Na1O7Sc1_ICSD_161501    | 3.40 eV    | 3.36 eV   |
| As2Na2_ICSD_421420         | 0.71 eV    | 0.55 eV   |
| As2Na4O7_ICSD_2887         | 3.21 eV    | 3.13 eV   |
| As2Na4O9Ti1_ICSD_59321     | 3.54 eV    | 3.34 eV   |
| As2Na4Te4_ICSD_300185      | 1.05 eV    | 1.15 eV   |
| As2Nd1_ICSD_1730           | 0.10 eV    | 0.12 eV   |
| As2Ni1O6_ICSD_80349        | 2.18 eV    | 1.96 eV   |
| As2Ni2O7_ICSD_69002        | 1.51 eV    | 1.84 eV   |
| As2Ni3O8_ICSD_63708        | 2.03 eV    | 2.15 eV   |
| As2Ni3O8_ICSD_63709        | 2.23 eV    | 2.15 eV   |
| As2O11W2_ICSD_15020        | 2.86 eV    | 2.67 eV   |
| As2O12S3_ICSD_32586        | 4.57 eV    | 3.80 eV   |
| As2O13Pb8_ICSD_99432       | 2.12 eV    | 2.04 eV   |
| As2O13V4_ICSD_60781        | 1.28 eV    | 1.73 eV   |
| As2O14Pb3Te1Zn3_ICSD_85574 | 3.00 eV    | 2.89 eV   |
| As2O1Sr4_ICSD_33904        | 1.19 eV    | 0.93 eV   |
| As2O1Yb4_ICSD_402951       | 0.65 eV    | 0.60 eV   |
| As2O3_ICSD_100434          | 2.90 eV    | 2.99 eV   |
| As2O3_ICSD_27588           | 2.74 eV    | 2.80 eV   |
| As2O3_ICSD_409611          | 4.02 eV    | 3.07 eV   |

Supplementary Table 638. Five-fold cross validated predictions for the band gap energy (32/277).

| system                     | calculated | predicted |
|----------------------------|------------|-----------|
| As2O4Pb1.ICSD_65027        | 2.85 eV    | 2.54 eV   |
| As2O4Zn1.ICSD_202249       | 3.53 eV    | 3.11 eV   |
| As2O4.ICSD_10436           | 3.34 eV    | 2.82 eV   |
| As2O5.ICSD_10015           | 1.35 eV    | 1.67 eV   |
| As2O5.ICSD_987             | 1.45 eV    | 1.96 eV   |
| As2O6Pb1.ICSD_81063        | 2.13 eV    | 2.08 eV   |
| As2O6Pd1.ICSD_187098       | 1.72 eV    | 1.63 eV   |
| As2O6S1.ICSD_4297          | 4.37 eV    | 3.67 eV   |
| As2O6Sr1.ICSD_420296       | 3.26 eV    | 3.09 eV   |
| As2O6Sr1.ICSD_420297       | 3.24 eV    | 2.96 eV   |
| As2O6Zn3.ICSD_10400        | 3.71 eV    | 3.56 eV   |
| As2O6Zn3.ICSD_417004       | 3.99 eV    | 3.43 eV   |
| As2O7Ti1.ICSD_73476        | 2.95 eV    | 2.82 eV   |
| As2O7Ti1.ICSD_73477        | 2.83 eV    | 2.73 eV   |
| As2O8Pb3.ICSD_200414       | 3.30 eV    | 2.59 eV   |
| As2O8Sr3.ICSD_420295       | 3.80 eV    | 3.56 eV   |
| As2O8Zn3.ICSD_404199       | 2.42 eV    | 2.80 eV   |
| As2O8Zn3.ICSD_404229       | 2.38 eV    | 2.60 eV   |
| As2O9S2.ICSD_63530         | 4.04 eV    | 3.87 eV   |
| As2O9V3.ICSD_424067        | 2.39 eV    | 1.96 eV   |
| As2Os1.ICSD_611138         | 0.89 eV    | 0.58 eV   |
| As2P2S7.ICSD_30706         | 2.64 eV    | 2.22 eV   |
| As2Pr1.ICSD_611219         | 0.12 eV    | 0.10 eV   |
| As2Pt1Rb2.ICSD_107529      | 0.80 eV    | 0.73 eV   |
| As2Pt1.ICSD_38428          | 0.17 eV    | 0.48 eV   |
| As2Rb2Si1.ICSD_60617       | 0.95 eV    | 1.01 eV   |
| As2Rb2Sn1.ICSD_71223       | 0.63 eV    | 0.67 eV   |
| As2Rh1.ICSD_42616          | 0.21 eV    | 0.36 eV   |
| As2Ru1.ICSD_611289         | 0.48 eV    | 0.45 eV   |
| As2S3.ICSD_185819          | 2.00 eV    | 1.80 eV   |
| As2S6Sn1Ti2.ICSD_72907     | 0.72 eV    | 1.28 eV   |
| As2Se3.ICSD_2600           | 1.34 eV    | 1.04 eV   |
| As2Se3.ICSD_611373         | 0.60 eV    | 1.05 eV   |
| As2Si1Zn1.ICSD_23707       | 1.12 eV    | 0.86 eV   |
| As2Si1.ICSD_611405         | 1.09 eV    | 0.96 eV   |
| As2Sr1Zn2.ICSD_23248       | 0.60 eV    | 0.51 eV   |
| As2Te3.ICSD_30981          | 0.44 eV    | 0.44 eV   |
| As2Te3.ICSD_41040          | 0.41 eV    | 0.35 eV   |
| As2Te3.ICSD_68110          | 0.40 eV    | 0.44 eV   |
| As2Yb1Zn2.ICSD_88231       | 0.54 eV    | 0.34 eV   |
| As2Zn1.ICSD_2021           | 0.28 eV    | 0.38 eV   |
| As2Zn3.ICSD_611608         | 0.17 eV    | 0.41 eV   |
| As3Ba3In1.ICSD_402338      | 0.52 eV    | 0.39 eV   |
| As3Ba3Nb1O1.ICSD_408853    | 1.10 eV    | 1.04 eV   |
| As3Ba3O1Ta1.ICSD_280155    | 1.10 eV    | 1.14 eV   |
| As3Ba5Cl1O12.ICSD_260065   | 4.00 eV    | 3.86 eV   |
| As3Be3Cl1Li4O12.ICSD_74526 | 4.44 eV    | 4.33 eV   |
| As3Bi2K3O12.ICSD_59887     | 3.32 eV    | 2.59 eV   |
| As3Br1Cd2.ICSD_100815      | 0.79 eV    | 0.82 eV   |
| As3Br1Cd2.ICSD_75170       | 0.79 eV    | 0.80 eV   |

Supplementary Table 639. Five-fold cross validated predictions for the band gap energy (33/277).

| system                     | calculated | predicted |
|----------------------------|------------|-----------|
| As3Br1Hg2.ICSD_75169       | 0.90 eV    | 0.79 eV   |
| As3Ca2.ICSD_43876          | 0.16 eV    | 0.54 eV   |
| As3Ca3Ga1.ICSD_60126       | 0.37 eV    | 0.45 eV   |
| As3Ca5F1O12.ICSD_172996    | 3.96 eV    | 3.81 eV   |
| As3Cd2I1.ICSD_40449        | 0.78 eV    | 0.77 eV   |
| As3Cd2I1.ICSD_8216         | 0.78 eV    | 0.81 eV   |
| As3Cl1O12Pb5.ICSD_69960    | 3.06 eV    | 2.90 eV   |
| As3Cl1O12Sr5.ICSD_260196   | 3.83 eV    | 3.90 eV   |
| As3Cl1O9Pb5.ICSD_100168    | 2.66 eV    | 2.55 eV   |
| As3Cl1O9Pb5.ICSD_31863     | 2.02 eV    | 2.49 eV   |
| As3Cs5Si1.ICSD_65716       | 0.59 eV    | 0.69 eV   |
| As3Cs6In1.ICSD_300145      | 0.51 eV    | 0.57 eV   |
| As3Cu4K1O12.ICSD_63059     | 0.84 eV    | 1.02 eV   |
| As3F1O12Sr5.ICSD_260044    | 3.91 eV    | 3.84 eV   |
| As3F6Sb1Se4.ICSD_24413     | 1.89 eV    | 1.73 eV   |
| As3H1Sr5.ICSD_173027       | 0.68 eV    | 0.92 eV   |
| As3H2Na1O9.ICSD_65011      | 2.61 eV    | 2.96 eV   |
| As3H5O10.ICSD_14327        | 3.01 eV    | 3.10 eV   |
| As3Hf1Na5.ICSD_66026       | 0.71 eV    | 0.92 eV   |
| As3Hg1S6Th1.ICSD_38363     | 1.24 eV    | 1.53 eV   |
| As3K5O10.ICSD_23302        | 3.04 eV    | 3.24 eV   |
| As3K6Nb1O1.ICSD_409630     | 1.01 eV    | 1.34 eV   |
| As3La1Zn3.ICSD_261981      | 0.10 eV    | 0.25 eV   |
| As3Mg4Na1O12.ICSD_59888    | 3.19 eV    | 3.31 eV   |
| As3Na1O12Ti2.ICSD_421531   | 2.76 eV    | 2.97 eV   |
| As3Na1O12Zr2.ICSD_97956    | 3.77 eV    | 3.59 eV   |
| As3Na1Zn4.ICSD_262036      | 0.32 eV    | 0.45 eV   |
| As3Na5Sn1.ICSD_656058      | 0.33 eV    | 0.34 eV   |
| As3O1Sr3Ta1.ICSD_409567    | 1.32 eV    | 1.16 eV   |
| As3Rb1Zn4.ICSD_262038      | 0.24 eV    | 0.29 eV   |
| As3Rb5Si1.ICSD_300191      | 0.38 eV    | 0.59 eV   |
| As3Sr2Zn2.ICSD_262413      | 0.18 eV    | 0.41 eV   |
| As3Sr4.ICSD_402110         | 0.59 eV    | 0.73 eV   |
| As4Ba3Si2.ICSD_41183       | 0.82 eV    | 0.77 eV   |
| As4Ba3Sn2.ICSD_30702       | 0.72 eV    | 0.54 eV   |
| As4Ba4Si1.ICSD_26467       | 0.99 eV    | 0.95 eV   |
| As4Ba4Ti1.ICSD_380115      | 1.11 eV    | 0.99 eV   |
| As4Bi1Cl7Hg6.ICSD_411204   | 1.28 eV    | 1.22 eV   |
| As4Br16Ga4Hg11.ICSD_411676 | 0.87 eV    | 1.22 eV   |
| As4Br1K1O6.ICSD_65206      | 2.73 eV    | 2.83 eV   |
| As4Br6Cd1Hg6.ICSD_417039   | 1.36 eV    | 1.10 eV   |
| As4Br7Cr1Hg6.ICSD_411481   | 1.30 eV    | 1.10 eV   |
| As4Br7Hg6Ti1.ICSD_411239   | 1.24 eV    | 1.17 eV   |
| As4C4F12.ICSD_9071         | 3.31 eV    | 3.28 eV   |
| As4Ca1Na2O12.ICSD_409335   | 2.62 eV    | 3.06 eV   |
| As4Ca3Ge2.ICSD_16455       | 0.60 eV    | 0.66 eV   |
| As4Ca3In2.ICSD_61336       | 0.22 eV    | 0.37 eV   |
| As4Ca3Si2.ICSD_16456       | 0.82 eV    | 0.81 eV   |
| As4Ca5H10O20.ICSD_21068    | 3.83 eV    | 3.81 eV   |
| As4Cd2Ge1.ICSD_42132       | 0.15 eV    | 0.27 eV   |

Supplementary Table 640. Five-fold cross validated predictions for the band gap energy (34/277).

| system                   | calculated | predicted |
|--------------------------|------------|-----------|
| As4Cl1Cu1S3_ICSD.419754  | 1.76 eV    | 1.73 eV   |
| As4Cl1K1O6_ICSD.65205    | 3.04 eV    | 2.85 eV   |
| As4Cl2Cu2S3_ICSD.419755  | 1.72 eV    | 1.62 eV   |
| As4Cl7Hg6In1_ICSD.411820 | 1.39 eV    | 1.21 eV   |
| As4Cl7Hg6Mo1_ICSD.411240 | 0.80 eV    | 1.16 eV   |
| As4Cl7Hg6Ti1_ICSD.411238 | 1.20 eV    | 1.33 eV   |
| As4Cs1F13_ICSD.281641    | 5.27 eV    | 4.57 eV   |
| As4Cs4Se8_ICSD.171373    | 1.30 eV    | 1.33 eV   |
| As4Cu3K2O12_ICSD.65416   | 1.32 eV    | 1.37 eV   |
| As4Cu6Hg3S12_ICSD.169803 | 0.49 eV    | 0.77 eV   |
| As4Eu3_ICSD.8211         | 0.28 eV    | 0.25 eV   |
| As4Ga1Na3Sr3_ICSD.402286 | 0.44 eV    | 0.72 eV   |
| As4Ge1Sr4_ICSD.610619    | 0.75 eV    | 0.92 eV   |
| As4Ge1Te7_ICSD.41107     | 0.36 eV    | 0.32 eV   |
| As4Ge2Sr3_ICSD.16454     | 0.77 eV    | 0.66 eV   |
| As4I1K1O6_ICSD.16889     | 2.36 eV    | 2.67 eV   |
| As4K7Nb1_ICSD.380109     | 1.13 eV    | 0.87 eV   |
| As4K7Ta1_ICSD.380110     | 1.06 eV    | 0.94 eV   |
| As4Mg1_ICSD.1079         | 0.81 eV    | 0.62 eV   |
| As4Na2O11_ICSD.62963     | 2.07 eV    | 2.56 eV   |
| As4Na8Ti1_ICSD.73310     | 1.05 eV    | 0.97 eV   |
| As4Nb1Rb7_ICSD.380111    | 0.78 eV    | 0.98 eV   |
| As4Pb9S15_ICSD.18097     | 1.57 eV    | 1.28 eV   |
| As4Rb5Ta1Ti2_ICSD.85784  | 1.46 eV    | 0.93 eV   |
| As4S3_ICSD.188058        | 2.29 eV    | 1.79 eV   |
| As4S4_ICSD.187210        | 2.06 eV    | 1.97 eV   |
| As4S5_ICSD.16107         | 1.98 eV    | 1.88 eV   |
| As4Se3_ICSD.611376       | 1.67 eV    | 1.02 eV   |
| As4Se4_ICSD.2056         | 0.16 eV    | 1.18 eV   |
| As4Se4_ICSD.2599         | 1.40 eV    | 0.72 eV   |
| As4Si1Sr4_ICSD.611409    | 1.11 eV    | 0.98 eV   |
| As4Si2Sr3_ICSD.16453     | 0.91 eV    | 0.89 eV   |
| As4Sn3_ICSD.163834       | 0.26 eV    | 0.31 eV   |
| As4Sr3_ICSD.100110       | 0.63 eV    | 0.58 eV   |
| As4Sr4Ti1_ICSD.380113    | 1.46 eV    | 1.09 eV   |
| As5B1O20Pb6_ICSD.404329  | 2.93 eV    | 2.92 eV   |
| As5Cs3O9_ICSD.413151     | 3.13 eV    | 3.35 eV   |
| As5I1Te7_ICSD.31877      | 0.25 eV    | 0.62 eV   |
| As5K6Sn3_ICSD.71009      | 0.54 eV    | 0.65 eV   |
| As6Ba1Pt4_ICSD.62519     | 0.19 eV    | 0.18 eV   |
| As6Bi1K3Se12_ICSD.180763 | 1.41 eV    | 1.11 eV   |
| As6Ca5Sn2_ICSD.61037     | 0.25 eV    | 0.33 eV   |
| As6Cs4_ICSD.409382       | 0.42 eV    | 0.70 eV   |
| As6Na10Sn2_ICSD.40559    | 0.13 eV    | 0.46 eV   |
| As6Pt4Sr1_ICSD.62518     | 0.17 eV    | 0.20 eV   |
| As6Rb4_ICSD.409381       | 0.39 eV    | 0.61 eV   |
| As8Ge38I8_ICSD.22033     | 1.01 eV    | 0.88 eV   |
| As8S9_ICSD.98792         | 1.73 eV    | 1.96 eV   |
| Au1Ba1Gd1Se3_ICSD.88718  | 0.18 eV    | 0.93 eV   |
| Au1Ba4C4K1O4_ICSD.40854  | 2.70 eV    | 2.31 eV   |

Supplementary Table 641. Five-fold cross validated predictions for the band gap energy (35/277).

| system                     | calculated | predicted |
|----------------------------|------------|-----------|
| Au1Ba4Na1O8_ICSD.73189     | 1.37 eV    | 1.93 eV   |
| Au1Bi1K2_ICSD.380341       | 0.89 eV    | 0.88 eV   |
| Au1Bi1Li2_ICSD.261786      | 0.09 eV    | 0.62 eV   |
| Au1Bi1Na2_ICSD.261788      | 0.49 eV    | 0.53 eV   |
| Au1Bi5Na2O11_ICSD.164986   | 0.91 eV    | 1.22 eV   |
| Au1Br1C2H8N4S2_ICSD.72684  | 3.38 eV    | 3.15 eV   |
| Au1Br1F6_ICSD.93481        | 2.04 eV    | 1.91 eV   |
| Au1Br1Se1_ICSD.2897        | 0.38 eV    | 1.23 eV   |
| Au1Br1_ICSD.200286         | 2.29 eV    | 2.06 eV   |
| Au1Br1_ICSD.200287         | 2.05 eV    | 2.05 eV   |
| Au1Br4K1_ICSD.280033       | 0.73 eV    | 1.20 eV   |
| Au1Br8Te1_ICSD.63129       | 0.80 eV    | 1.32 eV   |
| Au1C1Cl1O1_ICSD.33526      | 3.39 eV    | 2.38 eV   |
| Au1C1Cl3S2_ICSD.63379      | 1.96 eV    | 2.26 eV   |
| Au1C1N1_ICSD.165175        | 2.01 eV    | 2.34 eV   |
| Au1C2Cl1H3N1_ICSD.152108   | 4.00 eV    | 2.95 eV   |
| Au1C2Cl1H8N4S2_ICSD.170718 | 3.51 eV    | 3.20 eV   |
| Au1C2Cs1_ICSD.411251       | 2.39 eV    | 2.41 eV   |
| Au1C2K1N2S2_ICSD.159001    | 2.77 eV    | 2.73 eV   |
| Au1C2K1N2_ICSD.26498       | 3.45 eV    | 3.13 eV   |
| Au1C2K1_ICSD.411255        | 2.42 eV    | 2.44 eV   |
| Au1C2Li1_ICSD.411253       | 1.86 eV    | 2.09 eV   |
| Au1C2N2Rb1S2_ICSD.159002   | 3.00 eV    | 2.56 eV   |
| Au1C2N2Rb1_ICSD.66037      | 3.45 eV    | 3.04 eV   |
| Au1C2Na1_ICSD.411254       | 1.55 eV    | 2.10 eV   |
| Au1C2Rb1_ICSD.411252       | 2.58 eV    | 2.40 eV   |
| Au1C4H12N1_ICSD.110302     | 2.93 eV    | 2.99 eV   |
| Au1C4H2K1N4O1_ICSD.16043   | 4.25 eV    | 3.48 eV   |
| Au1Cl1F3P1_ICSD.415842     | 3.78 eV    | 2.91 eV   |
| Au1Cl1O1_ICSD.8190         | 1.10 eV    | 1.36 eV   |
| Au1Cl1_ICSD.6052           | 2.28 eV    | 1.61 eV   |
| Au1Cl3_ICSD.22146          | 1.24 eV    | 1.20 eV   |
| Au1Cl4Cs1_ICSD.423233      | 1.87 eV    | 1.45 eV   |
| Au1Cl4K1_ICSD.73080        | 1.49 eV    | 1.47 eV   |
| Au1Cl4N5S5_ICSD.61254      | 1.68 eV    | 1.64 eV   |
| Au1Cl4P1_ICSD.15565        | 2.80 eV    | 2.20 eV   |
| Au1Cl4Rb1_ICSD.26021       | 1.69 eV    | 1.41 eV   |
| Au1Cl4Ti1_ICSD.62107       | 1.82 eV    | 1.64 eV   |
| Au1Cl5S1_ICSD.39532        | 1.68 eV    | 1.73 eV   |
| Au1Cl7S1_ICSD.62908        | 1.78 eV    | 1.69 eV   |
| Au1Cl7Se1_ICSD.62511       | 1.74 eV    | 1.65 eV   |
| Au1Cl7Te1_ICSD.61350       | 1.58 eV    | 1.48 eV   |
| Au1Cl8P1_ICSD.62236        | 1.78 eV    | 2.10 eV   |
| Au1Co1Na4O5_ICSD.36661     | 2.00 eV    | 1.65 eV   |
| Au1Cr1S2_ICSD.88852        | 0.98 eV    | 0.85 eV   |
| Au1Cr3O8_ICSD.155508       | 1.17 eV    | 1.41 eV   |
| Au1Cs1F4_ICSD.152056       | 2.98 eV    | 2.63 eV   |
| Au1Cs1K2O2_ICSD.62064      | 2.29 eV    | 1.80 eV   |
| Au1Cs1N12_ICSD.416487      | 1.52 eV    | 1.70 eV   |
| Au1Cs1O1_ICSD.409553       | 1.66 eV    | 1.67 eV   |

Supplementary Table 642. Five-fold cross validated predictions for the band gap energy (36/277).

| system                   | calculated | predicted |
|--------------------------|------------|-----------|
| Au1Cs1Se3.ICSD_84002     | 1.06 eV    | 1.41 eV   |
| Au1Cs1Te1.ICSD_71653     | 1.48 eV    | 1.06 eV   |
| Au1Cs1.ICSD_150971       | 0.75 eV    | 0.57 eV   |
| Au1Cs3Ge4.ICSD_413725    | 0.92 eV    | 0.90 eV   |
| Au1Cs3Pb4.ICSD_107448    | 0.55 eV    | 0.47 eV   |
| Au1Eu3O6.ICSD_411503     | 0.24 eV    | 1.05 eV   |
| Au1F11Th2.ICSD_89619     | 2.59 eV    | 3.07 eV   |
| Au1F11U2.ICSD_152058     | 1.09 eV    | 1.94 eV   |
| Au1F12Sb2Xe2.ICSD_412106 | 1.45 eV    | 2.15 eV   |
| Au1F3.ICSD_16876         | 2.07 eV    | 1.83 eV   |
| Au1F4K1.ICSD_9906        | 2.88 eV    | 2.69 eV   |
| Au1F4Li1.ICSD_33953      | 2.60 eV    | 2.59 eV   |
| Au1F4Li1.ICSD_9908       | 2.60 eV    | 2.40 eV   |
| Au1F4Na1.ICSD_9905       | 2.62 eV    | 2.45 eV   |
| Au1F4Rb1.ICSD_9907       | 2.96 eV    | 2.70 eV   |
| Au1F6K1.ICSD_415874      | 2.20 eV    | 1.96 eV   |
| Au1F6Li1.ICSD_165209     | 2.10 eV    | 1.75 eV   |
| Au1F6O2.ICSD_171655      | 0.09 eV    | 1.53 eV   |
| Au1F6Ti1.ICSD_95770      | 1.78 eV    | 1.83 eV   |
| Au1Ga1O2.ICSD_95666      | 0.20 eV    | 0.94 eV   |
| Au1Gd3O6.ICSD_411500     | 1.80 eV    | 1.69 eV   |
| Au1Ge4K3.ICSD_413728     | 0.82 eV    | 0.78 eV   |
| Au1Ge4Rb3.ICSD_413724    | 0.89 eV    | 0.81 eV   |
| Au1I1Te1.ICSD_1661       | 0.93 eV    | 1.12 eV   |
| Au1I1.ICSD_24619         | 2.29 eV    | 1.66 eV   |
| Au1I2K5O2.ICSD_40376     | 1.98 eV    | 1.80 eV   |
| Au1I4K1O12.ICSD_417267   | 2.12 eV    | 1.83 eV   |
| Au1K1N12.ICSD_416489     | 1.47 eV    | 1.69 eV   |
| Au1K1N4O12.ICSD_16141    | 2.01 eV    | 2.24 eV   |
| Au1K1Na2O2.ICSD_61226    | 2.18 eV    | 1.95 eV   |
| Au1K1O2.ICSD_15115       | 1.36 eV    | 1.37 eV   |
| Au1K1O8S2.ICSD_412094    | 1.54 eV    | 2.11 eV   |
| Au1K1P2S7.ICSD_165325    | 1.50 eV    | 1.68 eV   |
| Au1K1S1.ICSD_202178      | 2.24 eV    | 2.08 eV   |
| Au1K1S5.ICSD_402875      | 1.78 eV    | 1.66 eV   |
| Au1K1Se1.ICSD_656713     | 1.90 eV    | 1.70 eV   |
| Au1K1Se2.ICSD_84003      | 0.92 eV    | 1.11 eV   |
| Au1K1Se5.ICSD_67372      | 1.01 eV    | 1.07 eV   |
| Au1K2P1S4.ICSD_85679     | 1.78 eV    | 1.80 eV   |
| Au1K2P1.ICSD_300201      | 1.21 eV    | 1.03 eV   |
| Au1K2Sb1.ICSD_380340     | 1.20 eV    | 1.09 eV   |
| Au1K3O1.ICSD_79086       | 0.64 eV    | 0.87 eV   |
| Au1K3P2Se8.ICSD_165321   | 1.28 eV    | 1.32 eV   |
| Au1K3Se13.ICSD_67373     | 0.66 eV    | 0.99 eV   |
| Au1K3Se2.ICSD_402000     | 2.10 eV    | 1.62 eV   |
| Au1K3Sn4.ICSD_107444     | 0.42 eV    | 0.56 eV   |
| Au1K5P2.ICSD_40700       | 0.52 eV    | 0.67 eV   |
| Au1La1O3.ICSD_73873      | 1.97 eV    | 1.74 eV   |
| Au1Li1S1.ICSD_165259     | 2.12 eV    | 1.94 eV   |
| Au1Li1S1.ICSD_280534     | 2.12 eV    | 1.80 eV   |

Supplementary Table 643. Five-fold cross validated predictions for the band gap energy (37/277).

| system                  | calculated | predicted |
|-------------------------|------------|-----------|
| Au1Li3O3.ICSD_15113     | 2.04 eV    | 1.75 eV   |
| Au1Li3S2.ICSD_280535    | 2.47 eV    | 2.13 eV   |
| Au1N12Rb1.ICSD_416488   | 1.50 eV    | 1.53 eV   |
| Au1Na1O2.ICSD_409547    | 1.32 eV    | 1.59 eV   |
| Au1Na1Se2.ICSD_84004    | 0.86 eV    | 1.00 eV   |
| Au1Na2O2Rb1.ICSD_411460 | 2.17 eV    | 1.99 eV   |
| Au1Na2Sb1.ICSD_23255    | 0.58 eV    | 0.66 eV   |
| Au1Na3O2.ICSD_62066     | 2.11 eV    | 1.90 eV   |
| Au1Na3S2.ICSD_202329    | 2.37 eV    | 1.95 eV   |
| Au1O1Rb1.ICSD_409552    | 1.68 eV    | 1.64 eV   |
| Au1O1Rb3.ICSD_75499     | 0.27 eV    | 0.70 eV   |
| Au1O2Rb1.ICSD_15116     | 1.76 eV    | 1.66 eV   |
| Au1O2Sc1.ICSD_95669     | 2.24 eV    | 2.12 eV   |
| Au1O2Y1.ICSD_95675      | 2.81 eV    | 2.16 eV   |
| Au1O8Rb1S2.ICSD_412095  | 1.77 eV    | 1.88 eV   |
| Au1O8Rb1Se2.ICSD_413989 | 1.57 eV    | 1.78 eV   |
| Au1P1S4Ti2.ICSD_85680   | 1.41 eV    | 1.63 eV   |
| Au1P1S4.ICSD_413009     | 1.21 eV    | 1.35 eV   |
| Au1Pb4Rb3.ICSD_107447   | 0.34 eV    | 0.49 eV   |
| Au1Rb1S1.ICSD_71654     | 2.13 eV    | 2.13 eV   |
| Au1Rb1Se1.ICSD_656714   | 1.83 eV    | 1.72 eV   |
| Au1Rb1Se3U1.ICSD_420483 | 1.12 eV    | 1.07 eV   |
| Au1Rb1Te1.ICSD_71652    | 1.28 eV    | 0.94 eV   |
| Au1Rb1Te3U1.ICSD_420485 | 0.54 eV    | 0.79 eV   |
| Au1Rb1.ICSD_58428       | 0.16 eV    | 0.68 eV   |
| Au1Rb2S4Sb1.ICSD_54507  | 1.63 eV    | 1.50 eV   |
| Au1Rb3Sn4.ICSD_107445   | 0.57 eV    | 0.58 eV   |
| Au2Ba1F12.ICSD_39316    | 1.77 eV    | 2.04 eV   |
| Au2Ba1F8.ICSD_65289     | 2.96 eV    | 2.52 eV   |
| Au2Ba1O4.ICSD_80327     | 1.69 eV    | 1.61 eV   |
| Au2Br2H12N4.ICSD_80216  | 3.65 eV    | 2.68 eV   |
| Au2Br6Cs2.ICSD_170696   | 0.66 eV    | 0.96 eV   |
| Au2Br6Rb2.ICSD_9577     | 1.11 eV    | 1.04 eV   |
| Au2Br6.ICSD_4069        | 0.65 eV    | 1.05 eV   |
| Au2C10Cl8S8.ICSD_65114  | 0.21 eV    | 1.82 eV   |
| Au2Ca1F12.ICSD_39315    | 1.71 eV    | 1.89 eV   |
| Au2Ca1O4.ICSD_79801     | 1.84 eV    | 1.57 eV   |
| Au2Cd1F12.ICSD_415873   | 1.99 eV    | 1.70 eV   |
| Au2Cd1F8.ICSD_85413     | 2.31 eV    | 2.25 eV   |
| Au2Cd2Rb2S4.ICSD_85582  | 2.07 eV    | 1.70 eV   |
| Au2Cl6Cs2.ICSD_417370   | 0.91 eV    | 1.27 eV   |
| Au2Cl6Cs2.ICSD_56470    | 0.93 eV    | 1.36 eV   |
| Au2Cs1F7.ICSD_152057    | 2.28 eV    | 2.37 eV   |
| Au2Cs2I6.ICSD_186066    | 0.64 eV    | 0.90 eV   |
| Au2Cs2Se3.ICSD_85708    | 1.51 eV    | 1.36 eV   |
| Au2F11H1Mg1.ICSD_415872 | 2.07 eV    | 2.06 eV   |
| Au2F8Hg1.ICSD_85414     | 2.08 eV    | 2.09 eV   |
| Au2F8Mg1.ICSD_65287     | 2.44 eV    | 2.42 eV   |
| Au2F8Ni1.ICSD_65288     | 2.23 eV    | 2.00 eV   |
| Au2F8Zn1.ICSD_65286     | 2.24 eV    | 2.19 eV   |

Supplementary Table 644. Five-fold cross validated predictions for the band gap energy (38/277).

| system                     | calculated | predicted |
|----------------------------|------------|-----------|
| Au2K2P2Se6.ICSD.165322     | 1.09 eV    | 1.19 eV   |
| Au2K2S4Sn1.ICSD.74022      | 1.56 eV    | 1.72 eV   |
| Au2La4O9.ICSD.74989        | 2.12 eV    | 1.95 eV   |
| Au2O10Se3.ICSD.170260      | 1.09 eV    | 1.41 eV   |
| Au2O11Se4.ICSD.15495       | 1.41 eV    | 1.57 eV   |
| Au2O3.ICSD.8014            | 1.03 eV    | 0.99 eV   |
| Au2O4Sr1.ICSD.80328        | 1.77 eV    | 1.61 eV   |
| Au2O7Se2.ICSD.37009        | 1.21 eV    | 1.31 eV   |
| Au2P2Se6Ti2.ICSD.171216    | 1.01 eV    | 0.93 eV   |
| Au2P3.ICSD.8058            | 0.17 eV    | 0.59 eV   |
| Au2S1.ICSD.612282          | 1.96 eV    | 1.32 eV   |
| Au3C6Co1K1N6.ICSD.201056   | 2.69 eV    | 2.78 eV   |
| Au3C6H6La1N6O3.ICSD.170989 | 2.72 eV    | 3.13 eV   |
| Au3C6K1N6Ni1.ICSD.249724   | 2.82 eV    | 2.90 eV   |
| Au3Cl8Rb3.ICSD.9578        | 0.92 eV    | 1.71 eV   |
| Au3Dy3Sb4.ICSD.611802      | 0.46 eV    | 0.44 eV   |
| Au3Er3Sb4.ICSD.611833      | 0.47 eV    | 0.46 eV   |
| Au3F12La1.ICSD.78915       | 2.57 eV    | 2.32 eV   |
| Au3Gd3Sb4.ICSD.611925      | 0.27 eV    | 0.36 eV   |
| Au3Ge1Na1.ICSD.16463       | 0.15 eV    | 0.77 eV   |
| Au3Ho3Sb4.ICSD.612001      | 0.46 eV    | 0.45 eV   |
| Au3K3Sb2.ICSD.78977        | 1.24 eV    | 0.89 eV   |
| Au3La3Sb4.ICSD.612105      | 0.39 eV    | 0.42 eV   |
| Au3Lu3Sb4.ICSD.612134      | 0.48 eV    | 0.45 eV   |
| Au3Na1Si1.ICSD.16462       | 0.15 eV    | 0.79 eV   |
| Au3O2Rb5.ICSD.91308        | 0.97 eV    | 1.14 eV   |
| Au3P7Sn1.ICSD.416407       | 0.21 eV    | 0.56 eV   |
| Au3Rb1Se2.ICSD.82541       | 2.01 eV    | 1.16 eV   |
| Au3Rb3Sb2.ICSD.78978       | 1.35 eV    | 0.86 eV   |
| Au3Sb4Tb3.ICSD.612293      | 0.46 eV    | 0.41 eV   |
| Au3Sb4Y3.ICSD.957          | 0.48 eV    | 0.46 eV   |
| Au4Cd1K2S4.ICSD.85583      | 2.18 eV    | 1.64 eV   |
| Au4Cl8.ICSD.201436         | 0.97 eV    | 1.37 eV   |
| Au4S3Ti2.ICSD.51235        | 1.24 eV    | 1.31 eV   |
| Au5Cs7O2.ICSD.411334       | 1.03 eV    | 1.01 eV   |
| Au5Cs7O2.ICSD.95821        | 1.04 eV    | 1.07 eV   |
| Au5O2Rb7.ICSD.95825        | 0.89 eV    | 0.98 eV   |
| Au6Rb4S5.ICSD.82556        | 1.94 eV    | 1.90 eV   |
| Au7I1P10.ICSD.12162        | 0.75 eV    | 0.80 eV   |
| Au7I1P10.ICSD.8059         | 0.84 eV    | 0.76 eV   |
| B0.667N0.667.ICSD.162872   | 4.46 eV    | 4.24 eV   |
| B10Ba2H2Na2O19.ICSD.95447  | 4.76 eV    | 5.08 eV   |
| B10Ca1La2O19.ICSD.92866    | 5.81 eV    | 5.50 eV   |
| B10O21Pb6.ICSD.2641        | 3.25 eV    | 3.35 eV   |
| B12Br1Cs3H12.ICSD.414584   | 4.75 eV    | 4.54 eV   |
| B12Br1H12K3.ICSD.414581    | 4.81 eV    | 4.65 eV   |
| B12Br1H12Rb3.ICSD.414583   | 4.74 eV    | 4.44 eV   |
| B12C2Li2.ICSD.415556       | 1.39 eV    | 1.68 eV   |
| B12C2Mg1.ICSD.416801       | 2.14 eV    | 1.65 eV   |
| B12C3.ICSD.612562          | 1.52 eV    | 1.21 eV   |

Supplementary Table 645. Five-fold cross validated predictions for the band gap energy (39/277).

| system                     | calculated | predicted |
|----------------------------|------------|-----------|
| B12Cl1Cs3H12.ICSD.414586   | 4.94 eV    | 4.77 eV   |
| B12Cl1H12Rb3.ICSD.414585   | 4.94 eV    | 4.23 eV   |
| B12Cs2H12.ICSD.92501       | 5.37 eV    | 4.73 eV   |
| B12Cs3H12I1.ICSD.98622     | 4.54 eV    | 4.19 eV   |
| B12H12I1K3.ICSD.98619      | 4.60 eV    | 4.48 eV   |
| B12H12I1Rb3.ICSD.98620     | 4.61 eV    | 4.41 eV   |
| B12H12K2.ICSD.36148        | 5.52 eV    | 4.93 eV   |
| B12H12Rb2.ICSD.20015       | 5.47 eV    | 5.02 eV   |
| B12H12Ti2.ICSD.422433      | 4.53 eV    | 3.89 eV   |
| B12H20Li2O4.ICSD.163690    | 5.26 eV    | 4.78 eV   |
| B12H20N2.ICSD.98618        | 5.65 eV    | 5.19 eV   |
| B12Ni1.ICSD.614986         | 0.25 eV    | 1.19 eV   |
| B12O24Se2Zn8.ICSD.74057    | 4.94 eV    | 3.83 eV   |
| B12P2.ICSD.62748           | 2.49 eV    | 1.73 eV   |
| B13C2Li1.ICSD.415557       | 2.54 eV    | 1.86 eV   |
| B18Hg2Rb4Se18.ICSD.410758  | 1.87 eV    | 1.68 eV   |
| B1Ba1Bi1O4.ICSD.154105     | 3.60 eV    | 2.95 eV   |
| B1Ba1Bi1S4.ICSD.248222     | 1.98 eV    | 2.12 eV   |
| B1Ba1Cl1F4.ICSD.188654     | 5.99 eV    | 5.87 eV   |
| B1Ba1F10P1.ICSD.420597     | 7.25 eV    | 6.41 eV   |
| B1Ba1F1O3Zn1.ICSD.248042   | 3.94 eV    | 3.91 eV   |
| B1Ba1F2Ga1O3.ICSD.91315    | 5.04 eV    | 4.86 eV   |
| B1Ba1F3O1.ICSD.16684       | 5.88 eV    | 6.11 eV   |
| B1Ba1Li1O3.ICSD.73218      | 4.39 eV    | 3.40 eV   |
| B1Ba1Li1O3.ICSD.92843      | 2.29 eV    | 3.23 eV   |
| B1Ba1Li1S3.ICSD.82352      | 2.16 eV    | 2.40 eV   |
| B1Ba1Na1O3.ICSD.250086     | 3.66 eV    | 3.78 eV   |
| B1Ba1O5P1.ICSD.50875       | 5.49 eV    | 5.22 eV   |
| B1Ba1O5P1.ICSD.99842       | 5.49 eV    | 5.23 eV   |
| B1Ba1S4Sb1.ICSD.248221     | 2.36 eV    | 2.15 eV   |
| B1Ba2Cl17Zr6.ICSD.203141   | 1.08 eV    | 1.55 eV   |
| B1Ba2Cl1N2.ICSD.418947     | 2.75 eV    | 2.49 eV   |
| B1Ba3O3P1.ICSD.402017      | 1.46 eV    | 1.73 eV   |
| B1Ba3O7P1.ICSD.150328      | 3.33 eV    | 3.93 eV   |
| B1Be2Cs1F2O3.ICSD.20000    | 5.92 eV    | 5.91 eV   |
| B1Be2F1O3.ICSD.200264      | 6.36 eV    | 6.18 eV   |
| B1Be2F1O3.ICSD.56847       | 6.35 eV    | 6.24 eV   |
| B1Be2F2K1O3.ICSD.16178     | 6.04 eV    | 5.88 eV   |
| B1Be2F2K1O3.ICSD.77277     | 6.05 eV    | 5.73 eV   |
| B1Be2F2Na1O3.ICSD.75594    | 5.89 eV    | 5.87 eV   |
| B1Be2F2O3Rb1.ICSD.260439   | 6.04 eV    | 5.94 eV   |
| B1Be2F2O3Rb1.ICSD.4223     | 5.92 eV    | 6.24 eV   |
| B1Be2H1O4.ICSD.34650       | 5.86 eV    | 5.94 eV   |
| B1Bi1O3.ICSD.413621        | 3.10 eV    | 2.93 eV   |
| B1Bi1O4Pb1.ICSD.183393     | 2.84 eV    | 2.74 eV   |
| B1Bi1O4Pb1.ICSD.416639     | 1.51 eV    | 2.57 eV   |
| B1Bi1.ICSD.184569          | 0.22 eV    | 0.59 eV   |
| B1Br1C4F4H11N1.ICSD.249155 | 5.09 eV    | 5.03 eV   |
| B1Br1Eu2N2.ICSD.409982     | 1.45 eV    | 1.49 eV   |
| B1Br1Mg2N2.ICSD.261620     | 3.32 eV    | 3.02 eV   |

Supplementary Table 646. Five-fold cross validated predictions for the band gap energy (40/277).

| system                      | calculated | predicted |
|-----------------------------|------------|-----------|
| B1Br1N2Sr2.ICSD.261795      | 2.40 eV    | 2.39 eV   |
| B1Br20K8Zr6.ICSD.165310     | 0.97 eV    | 1.71 eV   |
| B1Br3I3P1.ICSD.411438       | 1.94 eV    | 2.25 eV   |
| B1Br3P4S3.ICSD.165186       | 2.70 eV    | 2.25 eV   |
| B1Br3.ICSD.173374           | 3.78 eV    | 3.58 eV   |
| B1C1Ca3C12N1.ICSD.33850     | 2.17 eV    | 2.11 eV   |
| B1C1C12N1Sr3.ICSD.74914     | 1.87 eV    | 2.39 eV   |
| B1C1F4H6N3.ICSD.202434      | 5.68 eV    | 5.71 eV   |
| B1C1F6K1.ICSD.1194          | 7.00 eV    | 6.81 eV   |
| B1C1H5N2.ICSD.2165          | 5.45 eV    | 5.36 eV   |
| B1C1Li1.ICSD.245288         | 0.85 eV    | 1.97 eV   |
| B1C2Cs1F8.ICSD.200869       | 6.40 eV    | 6.43 eV   |
| B1C2N1.ICSD.93040           | 2.11 eV    | 2.65 eV   |
| B1C2N1.ICSD.93041           | 1.67 eV    | 2.24 eV   |
| B1C3.33N1.ICSD.161278       | 0.49 eV    | 2.08 eV   |
| B1C3Cs1F9N1O2.ICSD.410079   | 3.39 eV    | 4.02 eV   |
| B1C3F4H10N1.ICSD.171202     | 7.40 eV    | 6.55 eV   |
| B1C3H12N1.ICSD.249799       | 6.10 eV    | 5.70 eV   |
| B1C3K2N3.ICSD.262588        | 2.45 eV    | 4.17 eV   |
| B1C4Cl1F4H11N1.ICSD.320194  | 6.36 eV    | 6.04 eV   |
| B1C4Cs1N4.ICSD.414556       | 6.31 eV    | 5.20 eV   |
| B1C4Cu1N4.ICSD.414557       | 3.52 eV    | 3.92 eV   |
| B1C4H4N5.ICSD.414561        | 6.28 eV    | 5.04 eV   |
| B1C4K1N4.ICSD.411180        | 6.22 eV    | 5.01 eV   |
| B1C4K1O8.ICSD.281621        | 3.50 eV    | 3.98 eV   |
| B1C4Li1N4.ICSD.414558       | 6.35 eV    | 4.81 eV   |
| B1C4N4Na1.ICSD.414559       | 6.52 eV    | 4.43 eV   |
| B1C4N4Rb1.ICSD.414563       | 6.33 eV    | 5.93 eV   |
| B1C4N4Tl1.ICSD.414564       | 5.18 eV    | 4.55 eV   |
| B1C4Na1O8.ICSD.281622       | 3.53 eV    | 3.94 eV   |
| B1Ca1Ga1O4.ICSD.93390       | 4.01 eV    | 4.14 eV   |
| B1Ca1H1O3.ICSD.181633       | 4.94 eV    | 4.94 eV   |
| B1Ca1H1O5Si1.ICSD.168627    | 5.41 eV    | 5.15 eV   |
| B1Ca1H3Ni1O10P2.ICSD.409898 | 3.84 eV    | 3.51 eV   |
| B1Ca1Li1O3.ICSD.99386       | 5.03 eV    | 4.36 eV   |
| B1Ca1O5P1.ICSD.87893        | 5.31 eV    | 5.49 eV   |
| B1Ca2Cl1N2.ICSD.406361      | 3.33 eV    | 2.80 eV   |
| B1Ca2Cl1O3.ICSD.342         | 4.57 eV    | 4.13 eV   |
| B1Ca2F1N2.ICSD.50842        | 2.91 eV    | 3.34 eV   |
| B1Ca2H1N2.ICSD.414006       | 3.01 eV    | 2.73 eV   |
| B1Ca3N3.ICSD.95814          | 0.59 eV    | 1.70 eV   |
| B1Cd1Cs1O3.ICSD.189199      | 1.81 eV    | 2.60 eV   |
| B1Cd1Li1O3.ICSD.200615      | 2.11 eV    | 2.62 eV   |
| B1Cd1Li1O3.ICSD.20191       | 2.21 eV    | 2.39 eV   |
| B1Ce1N2.ICSD.410417         | 2.07 eV    | 2.14 eV   |
| B1Ce1O3.ICSD.99689          | 4.72 eV    | 4.36 eV   |
| B1Ce1O3.ICSD.99690          | 4.39 eV    | 4.18 eV   |
| B1Ce1O5Si1.ICSD.28026       | 5.24 eV    | 4.60 eV   |
| B1Ce1S3.ICSD.421071         | 2.44 eV    | 2.32 eV   |
| B1Cl1F4O2.ICSD.166598       | 1.91 eV    | 4.10 eV   |

Supplementary Table 647. Five-fold cross validated predictions for the band gap energy (41/277).

| system                   | calculated | predicted |
|--------------------------|------------|-----------|
| B1Cl1F6.ICSD.68277       | 3.33 eV    | 4.55 eV   |
| B1Cl1H4Na2O4.ICSD.32518  | 4.63 eV    | 4.71 eV   |
| B1Cl1Mg2N2.ICSD.413908   | 3.66 eV    | 3.52 eV   |
| B1Cl1N2Sr2.ICSD.50845    | 2.76 eV    | 2.61 eV   |
| B1Cl2H4K1Zn1.ICSD.174294 | 5.00 eV    | 4.29 eV   |
| B1Cl3.ICSD.27869         | 4.69 eV    | 4.59 eV   |
| B1Co3O5.ICSD.93484       | 0.63 eV    | 1.57 eV   |
| B1Co3O7P1.ICSD.51317     | 2.98 eV    | 2.56 eV   |
| B1Cr1O3.ICSD.43311       | 2.26 eV    | 2.01 eV   |
| B1Cr1O4Pb1.ICSD.97663    | 2.24 eV    | 2.30 eV   |
| B1Cr2O12P3.ICSD.409459   | 3.01 eV    | 2.65 eV   |
| B1Cs1F4.ICSD.95828       | 7.55 eV    | 7.27 eV   |
| B1Cs1Li2S3.ICSD.411530   | 3.10 eV    | 2.83 eV   |
| B1Cs1Na2O3.ICSD.67524    | 3.29 eV    | 3.10 eV   |
| B1Cs1Se3.ICSD.411342     | 1.64 eV    | 1.73 eV   |
| B1Cs3P2.ICSD.300123      | 1.69 eV    | 1.42 eV   |
| B1Cs3S3.ICSD.391170      | 2.48 eV    | 2.48 eV   |
| B1Cu1S2.ICSD.156413      | 1.94 eV    | 1.71 eV   |
| B1Cu1Se2.ICSD.613591     | 1.67 eV    | 1.22 eV   |
| B1Cu2H5O6.ICSD.54883     | 0.11 eV    | 1.33 eV   |
| B1Dy1O3.ICSD.59849       | 5.37 eV    | 4.66 eV   |
| B1Dy3O9W1.ICSD.250419    | 3.42 eV    | 3.47 eV   |
| B1F1H4N1O4P1.ICSD.170949 | 5.74 eV    | 5.59 eV   |
| B1F1N2Sr2.ICSD.50843     | 2.57 eV    | 2.82 eV   |
| B1F3H4O2.ICSD.26551      | 7.16 eV    | 6.46 eV   |
| B1F3Mg3O3.ICSD.4226      | 5.40 eV    | 5.26 eV   |
| B1F3Na2O4S1.ICSD.424150  | 5.76 eV    | 5.40 eV   |
| B1F3.ICSD.24783          | 8.04 eV    | 7.16 eV   |
| B1F4H2N3S3.ICSD.201705   | 2.27 eV    | 3.51 eV   |
| B1F4H3O1.ICSD.15591      | 7.54 eV    | 7.24 eV   |
| B1F4H4N1.ICSD.93978      | 7.48 eV    | 7.13 eV   |
| B1F4H5N2.ICSD.245055     | 6.31 eV    | 6.27 eV   |
| B1F4In1.ICSD.50218       | 4.55 eV    | 5.26 eV   |
| B1F4K1.ICSD.22260        | 7.83 eV    | 7.60 eV   |
| B1F4Li1.ICSD.171375      | 8.22 eV    | 7.73 eV   |
| B1F4N1O2.ICSD.240721     | 2.90 eV    | 2.72 eV   |
| B1F4Na1.ICSD.30349       | 7.83 eV    | 7.00 eV   |
| B1F4Rb1.ICSD.24016       | 7.68 eV    | 7.27 eV   |
| B1F4Tl1.ICSD.300222      | 5.78 eV    | 4.77 eV   |
| B1F5Li2.ICSD.426821      | 7.53 eV    | 7.66 eV   |
| B1F7N2O1S2.ICSD.414492   | 4.90 eV    | 4.84 eV   |
| B1F7S1.ICSD.10337        | 4.96 eV    | 5.43 eV   |
| B1F7Sn2.ICSD.15263       | 4.38 eV    | 4.30 eV   |
| B1F8N1.ICSD.165425       | 2.91 eV    | 3.32 eV   |
| B1F8N1.ICSD.63311        | 2.90 eV    | 2.97 eV   |
| B1F9Sn3.ICSD.15264       | 4.37 eV    | 4.22 eV   |
| B1Fe1Ni2O5.ICSD.69615    | 1.39 eV    | 1.41 eV   |
| B1Fe1O3.ICSD.34474       | 1.47 eV    | 1.99 eV   |
| B1Fe1O4Pb1.ICSD.97668    | 1.87 eV    | 1.71 eV   |
| B1Fe2O12P3.ICSD.260895   | 2.30 eV    | 2.85 eV   |

Supplementary Table 648. Five-fold cross validated predictions for the band gap energy (42/277).

| system                      | calculated | predicted |
|-----------------------------|------------|-----------|
| B1Fe2O4.ICSD.88450          | 0.35 eV    | 1.15 eV   |
| B1Fe3O5.ICSD.164815         | 0.52 eV    | 0.81 eV   |
| B1Fe3O6.ICSD.23863          | 1.54 eV    | 1.62 eV   |
| B1Ga1O4Pb1.ICSD.279600      | 3.37 eV    | 3.06 eV   |
| B1Gd1N2.ICSD.657369         | 2.17 eV    | 2.08 eV   |
| B1Gd1O3.ICSD.87779          | 2.41 eV    | 4.17 eV   |
| B1Gd3O9W1.ICSD.250417       | 3.38 eV    | 3.31 eV   |
| B1Ge1La1O5.ICSD.39262       | 3.92 eV    | 4.06 eV   |
| B1Ge1Li1O4.ICSD.28106       | 2.67 eV    | 4.10 eV   |
| B1Ge1Li1O4.ICSD.67535       | 4.43 eV    | 4.48 eV   |
| B1Ge2K1O6.ICSD.281258       | 3.39 eV    | 3.67 eV   |
| B1H10Li4N3.ICSD.161018      | 3.61 eV    | 3.79 eV   |
| B1H1Na2O3.ICSD.27211        | 3.82 eV    | 3.84 eV   |
| B1H1O2.ICSD.34639           | 7.06 eV    | 6.02 eV   |
| B1H2Li1.ICSD.153289         | 0.86 eV    | 3.64 eV   |
| B1H2Na1O7Si2.ICSD.12134     | 4.06 eV    | 4.61 eV   |
| B1H3In1Na1O10P2.ICSD.409585 | 3.17 eV    | 3.63 eV   |
| B1H3Mg3O6.ICSD.250420       | 3.48 eV    | 3.95 eV   |
| B1H3Na1O10P2V1.ICSD.409651  | 1.12 eV    | 2.27 eV   |
| B1H3O3.ICSD.52290           | 5.98 eV    | 5.47 eV   |
| B1H4K1.ICSD.160985          | 6.11 eV    | 5.63 eV   |
| B1H4K1.ICSD.160986          | 1.40 eV    | 3.42 eV   |
| B1H4Li1.ICSD.173101         | 5.51 eV    | 5.64 eV   |
| B1H4Li1.ICSD.186262         | 6.83 eV    | 6.72 eV   |
| B1H4Li1.ICSD.245569         | 6.77 eV    | 6.48 eV   |
| B1H4Li1.ICSD.95207          | 6.77 eV    | 6.50 eV   |
| B1H4N1O8P2Zn1.ICSD.410872   | 4.81 eV    | 4.63 eV   |
| B1H4Na1O4.ICSD.167112       | 5.11 eV    | 4.95 eV   |
| B1H4Na1.ICSD.159243         | 6.25 eV    | 6.38 eV   |
| B1H4Na1.ICSD.181024         | 6.32 eV    | 6.40 eV   |
| B1H4Na1.ICSD.182733         | 6.63 eV    | 5.80 eV   |
| B1H4Na1.ICSD.182734         | 6.54 eV    | 6.33 eV   |
| B1H4Na1.ICSD.261750         | 6.31 eV    | 6.34 eV   |
| B1H4Na1.ICSD.261751         | 5.46 eV    | 6.17 eV   |
| B1H5In1N1O9P2.ICSD.409584   | 4.05 eV    | 4.11 eV   |
| B1H5Li1N1.ICSD.180548       | 4.12 eV    | 4.97 eV   |
| B1H6N1.ICSD.165975          | 5.95 eV    | 5.62 eV   |
| B1H6N1.ICSD.180547          | 6.04 eV    | 5.99 eV   |
| B1H6N1.ICSD.181423          | 6.06 eV    | 5.97 eV   |
| B1H7Li1N1.ICSD.169560       | 5.63 eV    | 5.41 eV   |
| B1I1N2Sr2.ICSD.50598        | 2.53 eV    | 2.41 eV   |
| B1I3P4S3.ICSD.165187        | 2.27 eV    | 2.14 eV   |
| B1I3.ICSD.28328             | 2.67 eV    | 2.57 eV   |
| B1In1O3.ICSD.75254          | 2.83 eV    | 2.91 eV   |
| B1In2O12P3.ICSD.420643      | 4.01 eV    | 3.81 eV   |
| B1K1Li2O3.ICSD.48177        | 4.02 eV    | 4.01 eV   |
| B1K1Mg1O3.ICSD.174336       | 4.37 eV    | 4.08 eV   |
| B1K1Na2O3.ICSD.33261        | 2.82 eV    | 3.06 eV   |
| B1K1O6Si2.ICSD.380488       | 5.31 eV    | 5.12 eV   |
| B1K2Li1O3.ICSD.60949        | 3.60 eV    | 3.51 eV   |

Supplementary Table 649. Five-fold cross validated predictions for the band gap energy (43/277).

| system                 | calculated | predicted |
|------------------------|------------|-----------|
| B1K2Na1P2.ICSD.300133  | 1.79 eV    | 1.62 eV   |
| B1K3O13Sb4.ICSD.411501 | 1.85 eV    | 2.46 eV   |
| B1K3P2.ICSD.300104     | 1.65 eV    | 1.55 eV   |
| B1K3S3.ICSD.411607     | 2.71 eV    | 2.59 eV   |
| B1La1O3.ICSD.15383     | 4.40 eV    | 4.29 eV   |
| B1La1O5Si1.ICSD.83397  | 5.15 eV    | 5.06 eV   |
| B1La3O9W1.ICSD.39809   | 3.43 eV    | 3.32 eV   |
| B1Li1Mn1O3.ICSD.94318  | 2.58 eV    | 2.45 eV   |
| B1Li1O2.ICSD.200891    | 5.37 eV    | 5.43 eV   |
| B1Li1O2.ICSD.34256     | 7.29 eV    | 5.43 eV   |
| B1Li1O3Sr1.ICSD.92842  | 2.81 eV    | 3.69 eV   |
| B1Li1O4Si1.ICSD.67536  | 6.41 eV    | 5.47 eV   |
| B1Li1S3Sr1.ICSD.380105 | 2.39 eV    | 2.67 eV   |
| B1Li1Si2.ICSD.425643   | 1.15 eV    | 1.00 eV   |
| B1Li3N2.ICSD.155126    | 3.31 eV    | 3.18 eV   |
| B1Li3N2.ICSD.155129    | 3.36 eV    | 3.18 eV   |
| B1Li3N2.ICSD.655673    | 3.44 eV    | 3.22 eV   |
| B1Li3O3.ICSD.9105      | 5.14 eV    | 4.65 eV   |
| B1Li3S3.ICSD.75223     | 3.05 eV    | 3.26 eV   |
| B1Mg1Na1O3.ICSD.249567 | 3.62 eV    | 4.20 eV   |
| B1Mg3N3.ICSD.79623     | 1.37 eV    | 2.20 eV   |
| B1Mn1O4Pb1.ICSD.97664  | 0.68 eV    | 1.64 eV   |
| B1N1.ICSD.162871       | 4.46 eV    | 4.32 eV   |
| B1N1.ICSD.162875       | 3.57 eV    | 4.12 eV   |
| B1N1.ICSD.162876       | 5.75 eV    | 5.13 eV   |
| B1N1.ICSD.162877       | 1.57 eV    | 3.39 eV   |
| B1N1.ICSD.162880       | 3.49 eV    | 3.76 eV   |
| B1N1.ICSD.162882       | 3.54 eV    | 3.98 eV   |
| B1N1.ICSD.162883       | 5.13 eV    | 4.32 eV   |
| B1N1.ICSD.186246       | 4.46 eV    | 4.52 eV   |
| B1N1.ICSD.42002        | 4.46 eV    | 4.76 eV   |
| B1N1.ICSD.614873       | 5.21 eV    | 4.62 eV   |
| B1N2Na3.ICSD.68619     | 1.69 eV    | 1.96 eV   |
| B1N2Nd1.ICSD.657367    | 1.99 eV    | 2.18 eV   |
| B1Na1O2.ICSD.34645     | 4.14 eV    | 4.22 eV   |
| B1Na1O3Sr1.ICSD.172420 | 3.87 eV    | 3.85 eV   |
| B1Na1O4Si1.ICSD.39459  | 5.42 eV    | 5.33 eV   |
| B1Na2O3Rb1.ICSD.67525  | 2.96 eV    | 3.03 eV   |
| B1Na3O3.ICSD.1351      | 2.99 eV    | 3.09 eV   |
| B1Na3P2.ICSD.300124    | 1.89 eV    | 1.56 eV   |
| B1Na3S3.ICSD.411608    | 2.58 eV    | 2.54 eV   |
| B1Nb1Ni2O6.ICSD.32583  | 2.76 eV    | 2.50 eV   |
| B1Nb1O4.ICSD.63202     | 2.80 eV    | 2.97 eV   |
| B1Nd1O3.ICSD.240380    | 3.87 eV    | 3.90 eV   |
| B1Nd1O3.ICSD.412407    | 3.71 eV    | 4.11 eV   |
| B1Nd1S3.ICSD.421073    | 2.02 eV    | 2.26 eV   |
| B1O2Ti1.ICSD.36404     | 2.85 eV    | 2.89 eV   |
| B1O3P1Sr3.ICSD.401207  | 2.02 eV    | 1.95 eV   |
| B1O3Pr1.ICSD.421745    | 4.36 eV    | 3.99 eV   |
| B1O3Sc1.ICSD.65010     | 4.62 eV    | 4.79 eV   |

Supplementary Table 650. Five-fold cross validated predictions for the band gap energy (44/277).

| system                      | calculated | predicted |
|-----------------------------|------------|-----------|
| B1O3Ti3.ICSD.8084           | 1.37 eV    | 1.26 eV   |
| B1O3V1.ICSD.45060           | 1.43 eV    | 1.95 eV   |
| B1O3Y1.ICSD.44162           | 5.17 eV    | 4.66 eV   |
| B1O4P1.ICSD.26890           | 7.25 eV    | 6.11 eV   |
| B1O4P1.ICSD.413435          | 7.01 eV    | 6.14 eV   |
| B1O4Ta1.ICSD.402404         | 3.64 eV    | 3.07 eV   |
| B1O5P1Pb1.ICSD.93598        | 4.28 eV    | 3.88 eV   |
| B1O5P1Sr1.ICSD.77519        | 5.39 eV    | 5.39 eV   |
| B1O5P1Sr1.ICSD.97675        | 5.37 eV    | 5.40 eV   |
| B1O7P1Zn3.ICSD.406386       | 4.00 eV    | 3.66 eV   |
| B1O8P2Rb1Zn1.ICSD.410870    | 5.14 eV    | 4.55 eV   |
| B1O9Tb3W1.ICSD.250418       | 3.43 eV    | 3.43 eV   |
| B1P1S4.ICSD.24618           | 2.23 eV    | 2.45 eV   |
| B1P1.ICSD.184570            | 1.25 eV    | 1.15 eV   |
| B1P1.ICSD.615155            | 1.08 eV    | 1.46 eV   |
| B1P2Rb3.ICSD.402084         | 1.58 eV    | 1.46 eV   |
| B1Pr1S3.ICSD.421072         | 2.33 eV    | 2.18 eV   |
| B1Rb1S3.ICSD.73084          | 2.28 eV    | 2.64 eV   |
| B1Rb1Se3.ICSD.411343        | 1.52 eV    | 1.68 eV   |
| B1S2Th1.ICSD.71593          | 1.75 eV    | 1.63 eV   |
| B1S3Tb1.ICSD.710042         | 2.31 eV    | 2.15 eV   |
| B1S3Th1.ICSD.73085          | 1.68 eV    | 1.77 eV   |
| B1S3Ti3.ICSD.202528         | 1.40 eV    | 1.54 eV   |
| B1Sb1.ICSD.184571           | 0.75 eV    | 0.76 eV   |
| B1Se3Ti3.ICSD.40375         | 1.24 eV    | 1.22 eV   |
| B1.ICSD.659240              | 1.45 eV    | 1.23 eV   |
| B28.ICSD.164659             | 1.54 eV    | 1.65 eV   |
| B2Ba1Be2O6.ICSD.67975       | 5.39 eV    | 4.65 eV   |
| B2Ba1Cu1O5.ICSD.84683       | 1.68 eV    | 1.49 eV   |
| B2Ba1F8.ICSD.240991         | 7.99 eV    | 7.04 eV   |
| B2Ba1Ga2O7.ICSD.91280       | 4.05 eV    | 3.88 eV   |
| B2Ba1O6Ti1.ICSD.183931      | 2.89 eV    | 3.38 eV   |
| B2Ba1O6Zr1.ICSD.95527       | 4.14 eV    | 3.73 eV   |
| B2Ba1S4.ICSD.412516         | 2.72 eV    | 2.47 eV   |
| B2Ba1Se6.ICSD.411967        | 1.70 eV    | 1.62 eV   |
| B2Ba2Ca1O6.ICSD.80429       | 4.08 eV    | 3.93 eV   |
| B2Ba2Cd1O6.ICSD.180954      | 3.12 eV    | 2.83 eV   |
| B2Ba2Cl1Gd1O6.ICSD.262073   | 4.00 eV    | 3.77 eV   |
| B2Ba2Cl1Ho1O6.ICSD.65933    | 4.09 eV    | 3.79 eV   |
| B2Ba2Cl1O6Y1.ICSD.262072    | 4.04 eV    | 3.89 eV   |
| B2Ba2Cl1O6Yb1.ICSD.65934    | 0.16 eV    | 1.56 eV   |
| B2Ba2Mg1O6.ICSD.75986       | 4.53 eV    | 4.02 eV   |
| B2Ba3N4.ICSD.412663         | 2.51 eV    | 2.07 eV   |
| B2Ba3O12Ti3.ICSD.99460      | 2.55 eV    | 2.74 eV   |
| B2Ba4N4O1.ICSD.400338       | 2.81 eV    | 2.18 eV   |
| B2Be1C2.ICSD.418618         | 0.22 eV    | 1.42 eV   |
| B2Be1Ca1O5.ICSD.72520       | 5.59 eV    | 5.38 eV   |
| B2Be2Ca1F1K1O6.ICSD.183886  | 5.25 eV    | 5.19 eV   |
| B2Be2Ca1F1Na1O6.ICSD.183885 | 5.01 eV    | 5.15 eV   |
| B2Be2F1K1O6Sr1.ICSD.183887  | 4.91 eV    | 4.98 eV   |

Supplementary Table 651. Five-fold cross validated predictions for the band gap energy (45/277).

| system                     | calculated | predicted |
|----------------------------|------------|-----------|
| B2Be2O7Sr2.ICSD.79025      | 4.09 eV    | 4.44 eV   |
| B2Bi1F1O4.ICSD.172481      | 4.22 eV    | 3.89 eV   |
| B2Bi2Ca1O7.ICSD.245016     | 3.23 eV    | 2.96 eV   |
| B2Bi2O7Zn1.ICSD.152281     | 2.59 eV    | 2.88 eV   |
| B2Br4Cl6N2P2.ICSD.412556   | 2.89 eV    | 2.88 eV   |
| B2C2Ca1.ICSD.88019         | 0.48 eV    | 1.35 eV   |
| B2C2Mg1.ICSD.421839        | 1.31 eV    | 1.30 eV   |
| B2C2Mg1.ICSD.79587         | 1.02 eV    | 1.00 eV   |
| B2C6F8Fe1O6.ICSD.152380    | 4.38 eV    | 3.63 eV   |
| B2C8Cu1N8.ICSD.415546      | 2.52 eV    | 3.65 eV   |
| B2C8Hg1N8.ICSD.412297      | 4.59 eV    | 4.16 eV   |
| B2C8N8Zn1.ICSD.415547      | 5.69 eV    | 4.63 eV   |
| B2Ca1H10N2.ICSD.246139     | 3.84 eV    | 4.81 eV   |
| B2Ca1H12O10.ICSD.23016     | 5.43 eV    | 4.81 eV   |
| B2Ca1H2.ICSD.183133        | 0.13 eV    | 2.27 eV   |
| B2Ca1H8.ICSD.163262        | 4.96 eV    | 5.00 eV   |
| B2Ca1H8.ICSD.163263        | 5.22 eV    | 4.75 eV   |
| B2Ca1H8.ICSD.163480        | 5.15 eV    | 5.16 eV   |
| B2Ca1H8.ICSD.164182        | 4.94 eV    | 4.86 eV   |
| B2Ca1H8.ICSD.168224        | 5.09 eV    | 5.15 eV   |
| B2Ca1H8.ICSD.168225        | 5.09 eV    | 5.08 eV   |
| B2Ca1Li4O6.ICSD.99503      | 4.74 eV    | 4.43 eV   |
| B2Ca1O4.ICSD.20097         | 6.02 eV    | 5.45 eV   |
| B2Ca1O4.ICSD.23241         | 6.06 eV    | 5.80 eV   |
| B2Ca1O6Sn1.ICSD.30998      | 3.17 eV    | 3.27 eV   |
| B2Ca1O8Si2.ICSD.26491      | 5.66 eV    | 5.59 eV   |
| B2Ca2O5.ICSD.66516         | 4.75 eV    | 4.91 eV   |
| B2Ca3O6.ICSD.23664         | 4.81 eV    | 4.48 eV   |
| B2Cd1F1K1O6Zn2.ICSD.248025 | 3.06 eV    | 3.12 eV   |
| B2Cd1H8.ICSD.262600        | 3.69 eV    | 3.63 eV   |
| B2Cd2O5.ICSD.200621        | 2.59 eV    | 2.67 eV   |
| B2Cd2O5.ICSD.281357        | 2.60 eV    | 2.57 eV   |
| B2Cd3O6.ICSD.66170         | 1.62 eV    | 2.30 eV   |
| B2Ce1Cl1O4.ICSD.413236     | 5.02 eV    | 4.44 eV   |
| B2Ce3Cl3O6.ICSD.413237     | 4.32 eV    | 3.87 eV   |
| B2Cl1La1O4.ICSD.413209     | 5.18 eV    | 4.62 eV   |
| B2Cl1O4Pr1.ICSD.95851      | 3.90 eV    | 4.07 eV   |
| B2Cl4.ICSD.31693           | 2.92 eV    | 3.76 eV   |
| B2Co1O4.ICSD.422063        | 3.17 eV    | 3.23 eV   |
| B2Co2O5.ICSD.24284         | 3.53 eV    | 2.49 eV   |
| B2Co3O6.ICSD.24035         | 2.85 eV    | 2.24 eV   |
| B2Cs1Li5O6.ICSD.61203      | 3.48 eV    | 3.99 eV   |
| B2Cs1Nb1O6.ICSD.79703      | 3.30 eV    | 3.19 eV   |
| B2Cs1O6Ta1.ICSD.80423      | 3.43 eV    | 3.52 eV   |
| B2Cs3Li2Na1O6.ICSD.36531   | 3.41 eV    | 3.35 eV   |
| B2Cu1O6Pb2.ICSD.155317     | 1.64 eV    | 1.66 eV   |
| B2Cu1O6Sr2.ICSD.202934     | 1.59 eV    | 1.59 eV   |
| B2Cu2O6Sr1.ICSD.247206     | 1.18 eV    | 1.20 eV   |
| B2Cu2O6Sr1.ICSD.247207     | 1.18 eV    | 1.21 eV   |
| B2Cu2O6Sr1.ICSD.80592      | 1.18 eV    | 1.24 eV   |

Supplementary Table 652. Five-fold cross validated predictions for the band gap energy (46/277).

| system                       | calculated | predicted |
|------------------------------|------------|-----------|
| B2Eu3O6.ICSD.86479           | 1.93 eV    | 1.56 eV   |
| B2F10H1Nd1.ICSD.420467       | 4.85 eV    | 4.99 eV   |
| B2F10H1Pr1.ICSD.420466       | 5.11 eV    | 5.03 eV   |
| B2F3Gd3O6.ICSD.51140         | 5.35 eV    | 4.85 eV   |
| B2F4.ICSD.27867              | 4.88 eV    | 6.58 eV   |
| B2F8H6N2.ICSD.49614          | 7.44 eV    | 6.94 eV   |
| B2Fe1O4.ICSD.420403          | 2.93 eV    | 2.74 eV   |
| B2Fe1.ICSD.425310            | 0.68 eV    | 0.82 eV   |
| B2Fe2H2K2O18P4.ICSD.407797   | 2.44 eV    | 3.05 eV   |
| B2Ga2K2O7.ICSD.50039         | 3.85 eV    | 4.01 eV   |
| B2Ga2O7Sr1.ICSD.91279        | 4.02 eV    | 3.84 eV   |
| B2Ga6Ge6H8Na8O24.ICSD.188639 | 3.54 eV    | 3.70 eV   |
| B2H16Na2O14.ICSD.30532       | 3.87 eV    | 4.96 eV   |
| B2H4Li2O8.ICSD.100854        | 3.61 eV    | 5.29 eV   |
| B2H6.ICSD.1312               | 5.15 eV    | 5.46 eV   |
| B2H6.ICSD.413919             | 5.00 eV    | 5.51 eV   |
| B2H8K1Li1.ICSD.173236        | 6.09 eV    | 5.71 eV   |
| B2H8K1Na1.ICSD.163376        | 6.19 eV    | 6.07 eV   |
| B2H8K1Na1.ICSD.163377        | 6.18 eV    | 4.66 eV   |
| B2H8K1Na1.ICSD.163378        | 6.36 eV    | 5.68 eV   |
| B2H8K1Na1.ICSD.163379        | 6.40 eV    | 6.41 eV   |
| B2H8Mg1.ICSD.155717          | 6.07 eV    | 5.87 eV   |
| B2H8Mg1.ICSD.161140          | 6.55 eV    | 5.81 eV   |
| B2H8Mg1.ICSD.187436          | 6.60 eV    | 4.96 eV   |
| B2H8Mg1.ICSD.187440          | 3.81 eV    | 5.60 eV   |
| B2H8Mg1.ICSD.187459          | 5.99 eV    | 5.64 eV   |
| B2H8Mg1.ICSD.262083          | 5.48 eV    | 5.94 eV   |
| B2H8Zn1.ICSD.161376          | 4.89 eV    | 4.87 eV   |
| B2Hg3O6.ICSD.409688          | 2.64 eV    | 2.12 eV   |
| B2K1O6Ta1.ICSD.162214        | 3.65 eV    | 3.49 eV   |
| B2K2La2O7.ICSD.174543        | 4.09 eV    | 4.01 eV   |
| B2K2O6Zr1.ICSD.67982         | 3.40 eV    | 3.61 eV   |
| B2K3Nb3O12.ICSD.85091        | 2.24 eV    | 2.31 eV   |
| B2K3Nb3O12.ICSD.968          | 2.37 eV    | 2.42 eV   |
| B2K3O12Ta3.ICSD.201143       | 2.88 eV    | 2.89 eV   |
| B2K3O6Y1.ICSD.245925         | 3.19 eV    | 3.79 eV   |
| B2Li2S5.ICSD.401723          | 2.45 eV    | 2.79 eV   |
| B2Li2Se5.ICSD.411410         | 1.63 eV    | 1.70 eV   |
| B2Li3O6Sc1.ICSD.241234       | 2.55 eV    | 3.84 eV   |
| B2Li3O6Sc1.ICSD.261256       | 4.90 eV    | 4.60 eV   |
| B2Mg1O6Sn1.ICSD.28266        | 3.10 eV    | 3.31 eV   |
| B2Mg1O6Sr2.ICSD.240897       | 4.60 eV    | 4.48 eV   |
| B2Mg2O5.ICSD.24789           | 5.08 eV    | 4.89 eV   |
| B2Mg2O5.ICSD.81229           | 5.16 eV    | 5.15 eV   |
| B2Mg3O6.ICSD.24036           | 5.14 eV    | 5.15 eV   |
| B2Mn1O6Sn1.ICSD.79165        | 2.02 eV    | 2.36 eV   |
| B2Na1O5Sc1.ICSD.409522       | 5.01 eV    | 4.66 eV   |
| B2Na2S5.ICSD.401724          | 2.61 eV    | 2.59 eV   |
| B2Na3O6Sc1.ICSD.262733       | 3.59 eV    | 3.76 eV   |
| B2Na4O5.ICSD.10061           | 3.75 eV    | 3.44 eV   |

Supplementary Table 653. Five-fold cross validated predictions for the band gap energy (47/277).

| system                      | calculated | predicted |
|-----------------------------|------------|-----------|
| B2Ni1O4.ICSD.418385         | 3.24 eV    | 2.93 eV   |
| B2Ni3O6.ICSD.2016           | 2.55 eV    | 2.37 eV   |
| B2O3.ICSD.24649             | 6.25 eV    | 6.25 eV   |
| B2O3.ICSD.36066             | 6.26 eV    | 6.26 eV   |
| B2O4Sr1.ICSD.203226         | 4.94 eV    | 5.23 eV   |
| B2O4Sr1.ICSD.69102          | 6.37 eV    | 5.44 eV   |
| B2O5Sr2.ICSD.50739          | 4.27 eV    | 4.48 eV   |
| B2O5Zr1.ICSD.418931         | 3.79 eV    | 3.93 eV   |
| B2O6Pb1Zn2.ICSD.171139      | 3.76 eV    | 3.11 eV   |
| B2O6Sn1Sr1.ICSD.28267       | 3.11 eV    | 3.14 eV   |
| B2O6Sr3.ICSD.93395          | 4.39 eV    | 4.34 eV   |
| B2O6U1.ICSD.248127          | 3.79 eV    | 3.69 eV   |
| B2O6U1.ICSD.49908           | 3.84 eV    | 3.72 eV   |
| B2O7Se2.ICSD.172383         | 4.01 eV    | 3.78 eV   |
| B2O8Si2Sr1.ICSD.83368       | 5.49 eV    | 5.44 eV   |
| B2O9S2.ICSD.426544          | 6.68 eV    | 5.83 eV   |
| B2S4Sr1.ICSD.71594          | 2.83 eV    | 2.63 eV   |
| B2S6Sr3.ICSD.412879         | 2.32 eV    | 2.39 eV   |
| B3Ba1Li1S6.ICSD.82353       | 2.84 eV    | 2.61 eV   |
| B3Ba4N6Na1.ICSD.401210      | 2.05 eV    | 2.00 eV   |
| B3Ba5Br1O9.ICSD.422557      | 3.76 eV    | 3.62 eV   |
| B3Ba5C1N1O9.ICSD.414486     | 3.31 eV    | 3.03 eV   |
| B3Ba5Cl1O9.ICSD.422556      | 3.71 eV    | 3.83 eV   |
| B3Be2K1O7.ICSD.248202       | 5.42 eV    | 5.50 eV   |
| B3Be2K1O7.ICSD.248203       | 4.91 eV    | 5.39 eV   |
| B3Be2O7Rb1.ICSD.248205      | 4.79 eV    | 5.22 eV   |
| B3Be3F4Na1O9Sr3.ICSD.423143 | 4.79 eV    | 5.33 eV   |
| B3Bi1O6.ICSD.245893         | 3.94 eV    | 3.73 eV   |
| B3Bi1O6.ICSD.416822         | 3.86 eV    | 3.74 eV   |
| B3Ca1H7O9.ICSD.75922        | 5.41 eV    | 5.21 eV   |
| B3Ca4Gd1O10.ICSD.86172      | 4.37 eV    | 4.11 eV   |
| B3Ca4K1O9.ICSD.171422       | 4.60 eV    | 4.52 eV   |
| B3Ca4La1O10.ICSD.180596     | 4.28 eV    | 4.19 eV   |
| B3Ca4Li1N6.ICSD.83419       | 2.20 eV    | 2.30 eV   |
| B3Ca4Na1O9.ICSD.171421      | 4.08 eV    | 4.38 eV   |
| B3Ca5F1O9.ICSD.65763        | 4.25 eV    | 4.42 eV   |
| B3Ce1O6.ICSD.413903         | 5.22 eV    | 4.94 eV   |
| B3Ce1O6.ICSD.99691          | 5.15 eV    | 4.60 eV   |
| B3Cl1Eu5O9.ICSD.422555      | 2.04 eV    | 1.98 eV   |
| B3Cl1O9Sr5.ICSD.71871       | 3.94 eV    | 4.03 eV   |
| B3Cl6N3.ICSD.14276          | 3.13 eV    | 3.06 eV   |
| B3Cs1H8.ICSD.65947          | 5.97 eV    | 4.74 eV   |
| B3Eu4Li1N6.ICSD.400465      | 0.55 eV    | 1.32 eV   |
| B3Gd1O6.ICSD.8083           | 5.06 eV    | 4.81 eV   |
| B3H12Y1.ICSD.169076         | 4.49 eV    | 4.79 eV   |
| B3H2Na3O7.ICSD.1939         | 4.54 eV    | 4.58 eV   |
| B3H3O14Zn8.ICSD.416894      | 3.15 eV    | 3.49 eV   |
| B3H6N3.ICSD.401085          | 5.35 eV    | 4.89 eV   |
| B3K1O6Zn1.ICSD.174357       | 4.75 eV    | 4.62 eV   |
| B3K3O6.ICSD.16005           | 4.13 eV    | 3.95 eV   |

Supplementary Table 654. Five-fold cross validated predictions for the band gap energy (48/277).

| system                     | calculated | predicted |
|----------------------------|------------|-----------|
| B3K3S6.ICSD.79614          | 2.76 eV    | 2.61 eV   |
| B3La1O6.ICSD.20355         | 5.07 eV    | 5.34 eV   |
| B3La2Na3O9.ICSD.151884     | 3.74 eV    | 4.03 eV   |
| B3La3N6.ICSD.410598        | 2.12 eV    | 2.17 eV   |
| B3Li1N6Sr4.ICSD.402173     | 2.08 eV    | 2.06 eV   |
| B3Li1O5.ICSD.415200        | 6.37 eV    | 6.00 eV   |
| B3Li1S6Sr1.ICSD.79616      | 2.91 eV    | 2.61 eV   |
| B3N6Na1Sr4.ICSD.92577      | 1.97 eV    | 2.08 eV   |
| B3Na3O9Sc2.ICSD.245063     | 3.69 eV    | 4.00 eV   |
| B3Na3S6.ICSD.79613         | 2.52 eV    | 2.67 eV   |
| B3Nd1O6.ICSD.20075         | 3.59 eV    | 4.38 eV   |
| B3O5Rb1.ICSD.91545         | 5.29 eV    | 5.42 eV   |
| B3O5Tl1.ICSD.84855         | 4.22 eV    | 3.91 eV   |
| B3O6Pr1.ICSD.95850         | 4.28 eV    | 4.39 eV   |
| B3O6Rb3.ICSD.59826         | 3.93 eV    | 3.90 eV   |
| B3O9Rb1Zn4.ICSD.92616      | 3.39 eV    | 3.40 eV   |
| B3O9Sc1Sr3.ICSD.75339      | 4.85 eV    | 4.59 eV   |
| B3Rb3S6.ICSD.79615         | 2.82 eV    | 2.67 eV   |
| B3Si1.ICSD.412621          | 1.41 eV    | 1.18 eV   |
| B4Ba2O11Sc2.ICSD.86436     | 3.71 eV    | 4.45 eV   |
| B4Ba5F2O10.ICSD.73905      | 4.51 eV    | 4.35 eV   |
| B4C1Cl6O1.ICSD.280617      | 4.05 eV    | 3.58 eV   |
| B4C2Ca4H6Mg1O18.ICSD.80438 | 4.22 eV    | 4.12 eV   |
| B4Ca1O7.ICSD.412710        | 6.31 eV    | 6.56 eV   |
| B4Cl4.ICSD.27872           | 3.33 eV    | 3.16 eV   |
| B4Co1O7.ICSD.420402        | 3.86 eV    | 3.49 eV   |
| B4Cu1Er2O10.ICSD.401710    | 1.71 eV    | 1.84 eV   |
| B4Cu1Ho2O10.ICSD.408029    | 1.72 eV    | 1.81 eV   |
| B4Cu1Li6O10.ICSD.249215    | 3.23 eV    | 2.41 eV   |
| B4Cu1O7.ICSD.391408        | 1.54 eV    | 1.91 eV   |
| B4Dy1Mo1.ICSD.613645       | 0.31 eV    | 0.33 eV   |
| B4Dy1W1.ICSD.613694        | 0.26 eV    | 0.28 eV   |
| B4Er1Mo1.ICSD.613775       | 0.33 eV    | 0.33 eV   |
| B4Er1W1.ICSD.613826        | 0.28 eV    | 0.29 eV   |
| B4Fe1O7.ICSD.420401        | 3.46 eV    | 3.28 eV   |
| B4Fe3La1O12.ICSD.83506     | 2.07 eV    | 2.02 eV   |
| B4Fe3Nd1O12.ICSD.83507     | 1.57 eV    | 1.98 eV   |
| B4Fe3O12Tb1.ICSD.96455     | 2.14 eV    | 2.20 eV   |
| B4Ga2Li6O12.ICSD.9987      | 4.16 eV    | 4.15 eV   |
| B4Ga3Nd1O12.ICSD.200321    | 3.56 eV    | 3.76 eV   |
| B4Gd1Mo1.ICSD.614347       | 0.22 eV    | 0.27 eV   |
| B4Gd1W1.ICSD.614393        | 0.20 eV    | 0.27 eV   |
| B4H16Hf1.ICSD.35379        | 5.72 eV    | 3.95 eV   |
| B4H16Na1Sc1.ICSD.166748    | 5.11 eV    | 4.99 eV   |
| B4H16U1.ICSD.63132         | 2.85 eV    | 3.76 eV   |
| B4Hg1O7.ICSD.415347        | 1.79 eV    | 3.07 eV   |
| B4Ho1Mo1.ICSD.614475       | 0.32 eV    | 0.31 eV   |
| B4Ho1W1.ICSD.614514        | 0.27 eV    | 0.29 eV   |
| B4Ho2Ni1O10.ICSD.404814    | 3.48 eV    | 3.06 eV   |
| B4La1O12Sc3.ICSD.83405     | 4.72 eV    | 4.59 eV   |

Supplementary Table 655. Five-fold cross validated predictions for the band gap energy (49/277).

| system                      | calculated | predicted |
|-----------------------------|------------|-----------|
| B4La1O12Sc3.ICSD.89012      | 4.72 eV    | 4.43 eV   |
| B4La1O12Sc3.ICSD.89013      | 4.24 eV    | 4.57 eV   |
| B4Li2O7.ICSD.163177         | 5.62 eV    | 5.83 eV   |
| B4Mn1O7.ICSD.391409         | 5.10 eV    | 3.75 eV   |
| B4Mo1Tb1.ICSD.614843        | 0.30 eV    | 0.28 eV   |
| B4Mo1Y1.ICSD.20081          | 0.31 eV    | 0.32 eV   |
| B4Ni1O7.ICSD.391407         | 2.93 eV    | 3.39 eV   |
| B4O11Sc2Sr2.ICSD.86435      | 4.64 eV    | 4.50 eV   |
| B4O7Pb1.ICSD.185672         | 4.20 eV    | 3.44 eV   |
| B4O7Sn1.ICSD.249206         | 3.55 eV    | 4.04 eV   |
| B4O7Sr1.ICSD.27404          | 7.11 eV    | 6.17 eV   |
| B4O7Zn1.ICSD.412688         | 5.88 eV    | 5.55 eV   |
| B4Tb1W1.ICSD.615552         | 0.26 eV    | 0.25 eV   |
| B4W1Y1.ICSD.615702          | 0.27 eV    | 0.26 eV   |
| B5Ba2Li1O10.ICSD.71875      | 4.92 eV    | 4.72 eV   |
| B5Ca1Cl1H2O10Sr1.ICSD.91540 | 4.95 eV    | 4.70 eV   |
| B5Ca1Na3O10.ICSD.61165      | 4.43 eV    | 4.63 eV   |
| B5Ca2Cl1H2O10.ICSD.100261   | 3.54 eV    | 4.73 eV   |
| B5Ca2Cl1H2O10.ICSD.74548    | 5.01 eV    | 4.77 eV   |
| B5Ca3La3O15.ICSD.93394      | 4.68 eV    | 4.40 eV   |
| B5Cs2Li3O10.ICSD.180730     | 4.48 eV    | 4.29 eV   |
| B5Cu1O10Tb1.ICSD.401453     | 2.08 eV    | 2.19 eV   |
| B5H12N1O12.ICSD.90001       | 5.56 eV    | 5.59 eV   |
| B5H2Li3O10.ICSD.20155       | 5.89 eV    | 5.28 eV   |
| B5H8K1O12.ICSD.6292         | 5.60 eV    | 5.03 eV   |
| B5H9.ICSD.24636             | 5.80 eV    | 4.62 eV   |
| B5Na3O10Sr1.ICSD.260005     | 4.58 eV    | 4.63 eV   |
| B6Ba2Ca1O12.ICSD.30890      | 4.96 eV    | 5.15 eV   |
| B6Ba2Cd1O12.ICSD.425704     | 4.42 eV    | 3.97 eV   |
| B6Ba2Co1O12.ICSD.391014     | 2.92 eV    | 3.52 eV   |
| B6Ba2Mg1O12.ICSD.290356     | 5.19 eV    | 5.17 eV   |
| B6Ba2Mn1O12.ICSD.391013     | 4.01 eV    | 3.40 eV   |
| B6Ba2O12Zn1.ICSD.404486     | 4.31 eV    | 4.73 eV   |
| B6Ba3Ge2O16.ICSD.261403     | 4.08 eV    | 4.09 eV   |
| B6Br1K3O10.ICSD.172400      | 5.21 eV    | 4.54 eV   |
| B6Co4O13.ICSD.96561         | 3.73 eV    | 3.14 eV   |
| B6Cr1H16.ICSD.170564        | 2.33 eV    | 2.79 eV   |
| B6Cs1Li1O10.ICSD.75995      | 5.07 eV    | 5.12 eV   |
| B6Cs2H6.ICSD.65508          | 4.15 eV    | 4.24 eV   |
| B6Cs2O10.ICSD.25815         | 5.27 eV    | 5.26 eV   |
| B6Dy4O15.ICSD.412041        | 5.44 eV    | 5.30 eV   |
| B6H10.ICSD.43253            | 4.00 eV    | 4.97 eV   |
| B6H5K2N1O2.ICSD.67890       | 1.78 eV    | 3.33 eV   |
| B6H6K2.ICSD.65507           | 5.02 eV    | 4.80 eV   |
| B6Ho4O15.ICSD.412991        | 5.50 eV    | 5.28 eV   |
| B6Na2O11Zn1.ICSD.167333     | 5.02 eV    | 4.77 eV   |
| B6O13Zn4.ICSD.100290        | 4.04 eV    | 4.59 eV   |
| B6O18Sc1Sr6Y1.ICSD.67648    | 4.68 eV    | 4.52 eV   |
| B6O1.ICSD.71065             | 1.86 eV    | 2.75 eV   |
| B6Si1.ICSD.20240            | 0.14 eV    | 0.95 eV   |

Supplementary Table 656. Five-fold cross validated predictions for the band gap energy (50/277).

| system                      | calculated | predicted |
|-----------------------------|------------|-----------|
| B7Br1Cu3O13.ICSD.201347     | 0.80 eV    | 1.03 eV   |
| B7Br1Mn3O13.ICSD.80420      | 3.81 eV    | 3.04 eV   |
| B7Cl1Co3O13.ICSD.158297     | 3.02 eV    | 3.19 eV   |
| B7Cl1Cr3O13.ICSD.4231       | 2.59 eV    | 2.69 eV   |
| B7Cl1Mg3O13.ICSD.30351      | 5.92 eV    | 5.48 eV   |
| B7Cl1O13Zn3.ICSD.55444      | 4.95 eV    | 4.75 eV   |
| B7Cr3I1O13.ICSD.62178       | 1.85 eV    | 2.55 eV   |
| B7Cu3I1O13.ICSD.61058       | 0.33 eV    | 0.94 eV   |
| B7Fe3I1O13.ICSD.78420       | 2.70 eV    | 2.43 eV   |
| B7I1Ni3O13.ICSD.27946       | 1.98 eV    | 2.33 eV   |
| B8Ca1H4O15.ICSD.250323      | 5.51 eV    | 5.53 eV   |
| B8La9Na3O27.ICSD.95753      | 3.92 eV    | 4.10 eV   |
| B8S16.ICSD.15267            | 2.55 eV    | 2.72 eV   |
| B9Ba1Li1O15.ICSD.93013      | 5.66 eV    | 5.56 eV   |
| B9Ba1Na1O15.ICSD.93014      | 5.48 eV    | 5.40 eV   |
| B9Mg1N1.ICSD.280938         | 1.68 eV    | 1.43 eV   |
| Ba10N12Ti4.ICSD.79102       | 1.56 eV    | 1.09 eV   |
| Ba10O24P6S1.ICSD.410785     | 3.13 eV    | 3.96 eV   |
| Ba1Be1F1O4P1.ICSD.200922    | 3.74 eV    | 4.63 eV   |
| Ba1Be1F4.ICSD.414412        | 7.55 eV    | 7.09 eV   |
| Ba1Be1La2O5.ICSD.65292      | 3.82 eV    | 3.56 eV   |
| Ba1Be1O4Si1.ICSD.86792      | 4.60 eV    | 4.39 eV   |
| Ba1Be2N2.ICSD.415304        | 1.17 eV    | 1.92 eV   |
| Ba1Be2O7Si2.ICSD.100030     | 5.54 eV    | 5.51 eV   |
| Ba1Be2O7Si2.ICSD.263133     | 5.57 eV    | 5.21 eV   |
| Ba1Bi1Cl1O2.ICSD.79532      | 3.18 eV    | 3.12 eV   |
| Ba1Bi1I1O2.ICSD.97511       | 2.96 eV    | 2.81 eV   |
| Ba1Bi1Na1.ICSD.413810       | 0.30 eV    | 0.44 eV   |
| Ba1Bi1O3.ICSD.151895        | 0.13 eV    | 0.77 eV   |
| Ba1Bi1O3.ICSD.172756        | 0.69 eV    | 0.71 eV   |
| Ba1Bi1Se3.ICSD.10505        | 0.72 eV    | 0.81 eV   |
| Ba1Bi2La1S6.ICSD.85461      | 0.67 eV    | 1.04 eV   |
| Ba1Bi2Mg2.ICSD.100049       | 0.47 eV    | 0.39 eV   |
| Ba1Bi2Mo4O16.ICSD.416023    | 2.96 eV    | 2.34 eV   |
| Ba1Br1Cl1.ICSD.35458        | 4.93 eV    | 4.60 eV   |
| Ba1Br1F1.ICSD.155005        | 4.87 eV    | 4.81 eV   |
| Ba1Br1H1.ICSD.25544         | 3.21 eV    | 3.37 eV   |
| Ba1Br2H4O2.ICSD.33949       | 4.37 eV    | 4.12 eV   |
| Ba1Br2O6.ICSD.40287         | 4.33 eV    | 3.99 eV   |
| Ba1Br2O6.ICSD.66035         | 4.18 eV    | 4.02 eV   |
| Ba1Br2.ICSD.262675          | 4.38 eV    | 4.26 eV   |
| Ba1Br2.ICSD.79892           | 3.92 eV    | 4.05 eV   |
| Ba1Br6Th1.ICSD.78770        | 2.93 eV    | 2.57 eV   |
| Ba1C1Cl1H2N1O1S1.ICSD.82878 | 4.85 eV    | 4.21 eV   |
| Ba1C1Cl1N1S1.ICSD.94400     | 4.11 eV    | 3.61 eV   |
| Ba1C1Cu1F2O3.ICSD.79864     | 1.72 eV    | 2.02 eV   |
| Ba1C1F2Mn1O3.ICSD.95740     | 4.11 eV    | 3.15 eV   |
| Ba1C1F2O3Zn1.ICSD.95739     | 5.36 eV    | 4.47 eV   |
| Ba1C1N2.ICSD.75041          | 2.30 eV    | 2.97 eV   |
| Ba1C1O3.ICSD.158389         | 4.44 eV    | 4.05 eV   |

Supplementary Table 657. Five-fold cross validated predictions for the band gap energy (51/277).

| system                          | calculated | predicted |
|---------------------------------|------------|-----------|
| Ba1C1O3.ICSD.91897              | 3.97 eV    | 4.39 eV   |
| Ba1C1Si1.ICSD.168411            | 0.97 eV    | 0.91 eV   |
| Ba1C1Si1.ICSD.168413            | 0.30 eV    | 0.79 eV   |
| Ba1C2Ca1O6.ICSD.100477          | 4.12 eV    | 4.46 eV   |
| Ba1C2Ca1O6.ICSD.157982          | 4.68 eV    | 4.44 eV   |
| Ba1C2Ca2F2O6.ICSD.245746        | 4.73 eV    | 4.60 eV   |
| Ba1C2Ce1F1O6.ICSD.37195         | 3.28 eV    | 3.43 eV   |
| Ba1C2Ce1F1O6.ICSD.74178         | 4.29 eV    | 3.54 eV   |
| Ba1C2F2O6Pb2.ICSD.280899        | 4.06 eV    | 3.13 eV   |
| Ba1C2H2O4.ICSD.151335           | 4.68 eV    | 4.26 eV   |
| Ba1C2H2O5.ICSD.151115           | 3.16 eV    | 3.52 eV   |
| Ba1C2H4O6.ICSD.162707           | 3.42 eV    | 3.63 eV   |
| Ba1C2Mg1O6.ICSD.24435           | 4.17 eV    | 4.16 eV   |
| Ba1C2Mg1O6.ICSD.89038           | 4.08 eV    | 4.27 eV   |
| Ba1C2N2S2.ICSD.94428            | 3.85 eV    | 3.63 eV   |
| Ba1C2O4.ICSD.261703             | 3.25 eV    | 3.43 eV   |
| Ba1C2.ICSD.168408               | 2.88 eV    | 2.05 eV   |
| Ba1C2.ICSD.186576               | 1.38 eV    | 1.47 eV   |
| Ba1C2.ICSD.88098                | 1.61 eV    | 1.46 eV   |
| Ba1C2.ICSD.88102                | 1.91 eV    | 2.38 eV   |
| Ba1C4Ce2F1Na1O12.ICSD.77499     | 4.20 eV    | 4.23 eV   |
| Ba1C4H6O7.ICSD.62387            | 2.68 eV    | 3.34 eV   |
| Ba1C4H8N4O4Pt1.ICSD.851         | 2.21 eV    | 2.61 eV   |
| Ba1C4O4.ICSD.412830             | 2.56 eV    | 2.95 eV   |
| Ba1C8N8Pt2Rb2.ICSD.409861       | 2.49 eV    | 3.14 eV   |
| Ba1Ca1Fe4O7.ICSD.161791         | 1.19 eV    | 1.23 eV   |
| Ba1Ca1Fe4O8.ICSD.15174          | 1.59 eV    | 1.51 eV   |
| Ba1Ca1Ga4O8.ICSD.280042         | 3.19 eV    | 3.05 eV   |
| Ba1Ca1O4Si1.ICSD.67092          | 4.38 eV    | 4.26 eV   |
| Ba1Ca1O7V2.ICSD.80810           | 3.22 eV    | 2.76 eV   |
| Ba1Ca1Pb1.ICSD.615799           | 0.22 eV    | 0.26 eV   |
| Ba1Ca1Sn1.ICSD.58641            | 0.28 eV    | 0.32 eV   |
| Ba1Ca2Mg1O8Si2.ICSD.422406      | 4.99 eV    | 4.46 eV   |
| Ba1Ca2N12P6.ICSD.415714         | 4.07 eV    | 3.89 eV   |
| Ba1Ca2O9Si3.ICSD.24426          | 4.57 eV    | 4.46 eV   |
| Ba1Ca4Co2N4.ICSD.409921         | 0.52 eV    | 0.65 eV   |
| Ba1Ca4Cu2N4.ICSD.86066          | 0.35 eV    | 0.93 eV   |
| Ba1Cd0.333O3Ta0.667.ICSD.156335 | 3.60 eV    | 3.41 eV   |
| Ba1Cd1F1Sb1.ICSD.421815         | 0.38 eV    | 0.98 eV   |
| Ba1Cd1Ge1S4.ICSD.23343          | 2.68 eV    | 2.12 eV   |
| Ba1Cd1O7P2.ICSD.72673           | 3.67 eV    | 3.49 eV   |
| Ba1Cd1O7V2.ICSD.80811           | 3.09 eV    | 2.77 eV   |
| Ba1Cd1S2.ICSD.66655             | 1.69 eV    | 1.75 eV   |
| Ba1Cd1Sb2Yb1.ICSD.422280        | 0.18 eV    | 0.31 eV   |
| Ba1Cd2P2.ICSD.615814            | 0.78 eV    | 0.68 eV   |
| Ba1Ce1Cu1S3.ICSD.659174         | 1.21 eV    | 1.20 eV   |
| Ba1Ce1Cu1Se3.ICSD.659176        | 0.94 eV    | 0.99 eV   |
| Ba1Ce1N2.ICSD.74791             | 0.52 eV    | 1.05 eV   |
| Ba1Ce1O3.ICSD.29109             | 2.96 eV    | 2.24 eV   |
| Ba1Ce1O3.ICSD.79627             | 2.89 eV    | 3.03 eV   |

Supplementary Table 658. Five-fold cross validated predictions for the band gap energy (52/277).

| system                    | calculated | predicted |
|---------------------------|------------|-----------|
| Ba1Ce1O3.ICSD.88590       | 2.89 eV    | 2.74 eV   |
| Ba1Ce1O3.ICSD.94347       | 2.87 eV    | 2.84 eV   |
| Ba1Ce2Co1S5.ICSD.93708    | 1.14 eV    | 0.98 eV   |
| Ba1Ce2Mn1S5.ICSD.91228    | 0.37 eV    | 1.02 eV   |
| Ba1Ce2S5Zn1.ICSD.93712    | 1.36 eV    | 1.35 eV   |
| Ba1Cl1Cu1O4P1.ICSD.79883  | 1.40 eV    | 1.68 eV   |
| Ba1Cl1F1.ICSD.35491       | 5.44 eV    | 5.38 eV   |
| Ba1Cl1H1O1.ICSD.74721     | 4.86 eV    | 4.53 eV   |
| Ba1Cl1H1.ICSD.37201       | 3.48 eV    | 3.26 eV   |
| Ba1Cl1O2Sb1.ICSD.200962   | 2.88 eV    | 2.85 eV   |
| Ba1Cl1O3V1.ICSD.50786     | 2.34 eV    | 2.16 eV   |
| Ba1Cl2H2O1.ICSD.60886     | 5.12 eV    | 4.81 eV   |
| Ba1Cl2H4O2.ICSD.2254      | 4.54 eV    | 4.76 eV   |
| Ba1Cl2H6O11.ICSD.65020    | 5.30 eV    | 4.74 eV   |
| Ba1Cl2Hg2O2.ICSD.77509    | 1.60 eV    | 1.80 eV   |
| Ba1Cl2O6.ICSD.40285       | 5.27 eV    | 4.36 eV   |
| Ba1Cl2.ICSD.183924        | 5.13 eV    | 4.70 eV   |
| Ba1Cl2.ICSD.2190          | 4.57 eV    | 4.88 eV   |
| Ba1Cl2.ICSD.2191          | 5.44 eV    | 4.13 eV   |
| Ba1Cl2.ICSD.79891         | 3.54 eV    | 4.52 eV   |
| Ba1Cl4Pd1.ICSD.411837     | 2.12 eV    | 2.25 eV   |
| Ba1Cl4Zn1.ICSD.410193     | 4.96 eV    | 4.89 eV   |
| Ba1Cl4Zn1.ICSD.411951     | 4.90 eV    | 4.71 eV   |
| Ba1Cl5Gd1.ICSD.407832     | 3.88 eV    | 3.90 eV   |
| Ba1Co1Dy2O5.ICSD.74974    | 2.35 eV    | 2.13 eV   |
| Ba1Co1Dy2O5.ICSD.85060    | 1.90 eV    | 1.74 eV   |
| Ba1Co1Er2O5.ICSD.65469    | 1.94 eV    | 1.86 eV   |
| Ba1Co1Er2O5.ICSD.73168    | 2.37 eV    | 2.20 eV   |
| Ba1Co1F4.ICSD.261189      | 4.36 eV    | 3.74 eV   |
| Ba1Co1F6Li1.ICSD.41178    | 2.98 eV    | 3.75 eV   |
| Ba1Co1Ho2O5.ICSD.65467    | 2.36 eV    | 2.18 eV   |
| Ba1Co1La2S5.ICSD.95267    | 1.18 eV    | 1.06 eV   |
| Ba1Co1Lu2O5.ICSD.74977    | 2.29 eV    | 1.81 eV   |
| Ba1Co1Nd2O5.ICSD.202973   | 1.73 eV    | 1.71 eV   |
| Ba1Co1Nd2S5.ICSD.96554    | 1.17 eV    | 1.22 eV   |
| Ba1Co1O2.ICSD.25813       | 1.63 eV    | 1.42 eV   |
| Ba1Co1O3.ICSD.88670       | 0.60 eV    | 1.24 eV   |
| Ba1Co1O4Si1.ICSD.73778    | 3.46 eV    | 2.79 eV   |
| Ba1Co1O5Y2.ICSD.85061     | 2.36 eV    | 1.72 eV   |
| Ba1Co1O7P2.ICSD.202853    | 3.92 eV    | 3.48 eV   |
| Ba1Co2H2O9P2.ICSD.84830   | 3.70 eV    | 3.19 eV   |
| Ba1Co2O7Si2.ICSD.74160    | 3.60 eV    | 2.96 eV   |
| Ba1Co3H2O10V2.ICSD.236321 | 2.64 eV    | 2.11 eV   |
| Ba1Co4Ho1O7.ICSD.420423   | 0.35 eV    | 0.85 eV   |
| Ba1Co4Ho1O7.ICSD.420426   | 0.96 eV    | 0.74 eV   |
| Ba1Co4Ho1O7.ICSD.420427   | 0.99 eV    | 0.91 eV   |
| Ba1Co4O7Y1.ICSD.188853    | 0.82 eV    | 0.91 eV   |
| Ba1Co4O7Y1.ICSD.95745     | 0.95 eV    | 1.02 eV   |
| Ba1Cr1F5.ICSD.31705       | 3.49 eV    | 2.87 eV   |
| Ba1Cr1O4.ICSD.188534      | 2.92 eV    | 2.78 eV   |

Supplementary Table 659. Five-fold cross validated predictions for the band gap energy (53/277).

| system                    | calculated | predicted |
|---------------------------|------------|-----------|
| Ba1Cr1O4.ICSD.62560       | 2.93 eV    | 2.76 eV   |
| Ba1Cr1S2.ICSD.165626      | 0.33 eV    | 0.84 eV   |
| Ba1Cs2H6N2O12.ICSD.411040 | 0.70 eV    | 2.82 eV   |
| Ba1Cu1Dy1Te3.ICSD.85601   | 0.61 eV    | 0.89 eV   |
| Ba1Cu1Dy2O5.ICSD.93463    | 1.06 eV    | 1.17 eV   |
| Ba1Cu1Er1S3.ICSD.78176    | 1.32 eV    | 1.31 eV   |
| Ba1Cu1Er1Se3.ICSD.659168  | 1.10 eV    | 1.18 eV   |
| Ba1Cu1Er2O5.ICSD.72165    | 1.04 eV    | 1.13 eV   |
| Ba1Cu1F1S1.ICSD.183712    | 1.93 eV    | 1.82 eV   |
| Ba1Cu1F1Se1.ICSD.75585    | 1.74 eV    | 1.60 eV   |
| Ba1Cu1F1Te1.ICSD.245624   | 1.29 eV    | 1.53 eV   |
| Ba1Cu1F4.ICSD.9930        | 1.66 eV    | 2.37 eV   |
| Ba1Cu1F7Fe1.ICSD.60952    | 2.15 eV    | 2.07 eV   |
| Ba1Cu1Gd1Se3.ICSD.280698  | 1.01 eV    | 0.97 eV   |
| Ba1Cu1Ho2O5.ICSD.72163    | 1.05 eV    | 1.12 eV   |
| Ba1Cu1La1S3.ICSD.659175   | 1.16 eV    | 1.28 eV   |
| Ba1Cu1La1Se3.ICSD.659178  | 1.01 eV    | 1.10 eV   |
| Ba1Cu1La1Te3.ICSD.88715   | 0.75 eV    | 0.92 eV   |
| Ba1Cu1N1.ICSD.86064       | 0.15 eV    | 0.75 eV   |
| Ba1Cu1Na2O8V2.ICSD.72364  | 1.75 eV    | 1.63 eV   |
| Ba1Cu1Nd1S3.ICSD.659173   | 1.10 eV    | 1.30 eV   |
| Ba1Cu1Nd2O5.ICSD.154576   | 1.64 eV    | 1.61 eV   |
| Ba1Cu1O10Si4.ICSD.71864   | 2.36 eV    | 2.10 eV   |
| Ba1Cu1O5Pr2.ICSD.85952    | 1.67 eV    | 1.37 eV   |
| Ba1Cu1O5Y2.ICSD.72572     | 1.09 eV    | 1.43 eV   |
| Ba1Cu1O6Se2.ICSD.202387   | 1.60 eV    | 1.74 eV   |
| Ba1Cu1O6Se2.ICSD.202388   | 1.55 eV    | 1.50 eV   |
| Ba1Cu1O7V2.ICSD.40839     | 1.71 eV    | 1.68 eV   |
| Ba1Cu1S3Sc1.ICSD.659165   | 1.17 eV    | 1.19 eV   |
| Ba1Cu1S3Y1.ICSD.659166    | 1.34 eV    | 1.20 eV   |
| Ba1Cu1Se3Y1.ICSD.659169   | 1.11 eV    | 1.17 eV   |
| Ba1Cu1Te3Y1.ICSD.88716    | 0.62 eV    | 0.69 eV   |
| Ba1Cu2Ge1S4.ICSD.10006    | 1.32 eV    | 1.05 eV   |
| Ba1Cu2Ge1Se4.ICSD.411404  | 0.68 eV    | 0.82 eV   |
| Ba1Cu2Ge2O7.ICSD.77133    | 0.99 eV    | 1.20 eV   |
| Ba1Cu2O2.ICSD.9456        | 1.76 eV    | 1.46 eV   |
| Ba1Cu2O7Si2.ICSD.51281    | 1.27 eV    | 1.43 eV   |
| Ba1Cu2S2.ICSD.89573       | 1.24 eV    | 1.20 eV   |
| Ba1Cu2S2.ICSD.89575       | 0.70 eV    | 0.99 eV   |
| Ba1Cu2S4Sn1.ICSD.52685    | 0.53 eV    | 1.03 eV   |
| Ba1Cu2Se2.ICSD.89574      | 0.82 eV    | 0.82 eV   |
| Ba1Cu2Se2.ICSD.89576      | 0.55 eV    | 0.65 eV   |
| Ba1Cu2Se4Sn1.ICSD.170857  | 0.58 eV    | 0.67 eV   |
| Ba1Cu2Te2.ICSD.51444      | 0.78 eV    | 0.82 eV   |
| Ba1Cu3H2O10V2.ICSD.67726  | 1.20 eV    | 1.45 eV   |
| Ba1Cu3O4.ICSD.83079       | 0.67 eV    | 1.14 eV   |
| Ba1Cu4O17P4V1.ICSD.406667 | 1.04 eV    | 1.65 eV   |
| Ba1Cu4S3.ICSD.15138       | 0.84 eV    | 0.93 eV   |
| Ba1Cu4S3.ICSD.15139       | 0.52 eV    | 0.71 eV   |
| Ba1Cu5La4O12.ICSD.79398   | 0.34 eV    | 0.94 eV   |

Supplementary Table 660. Five-fold cross validated predictions for the band gap energy (54/277).

| system                     | calculated | predicted |
|----------------------------|------------|-----------|
| Ba1Dy1Fe2O4.996.ICSD_99611 | 0.45 eV    | 1.02 eV   |
| Ba1Dy2Ni1O5.ICSD_72627     | 1.92 eV    | 1.92 eV   |
| Ba1Dy2O5Pd1.ICSD_404496    | 2.36 eV    | 2.37 eV   |
| Ba1Dy2S4.ICSD_615841       | 1.75 eV    | 1.70 eV   |
| Ba1Dy2Se4.ICSD_615842      | 1.37 eV    | 1.22 eV   |
| Ba1Dy2Te4.ICSD_90334       | 0.78 eV    | 0.83 eV   |
| Ba1Er2F8.ICSD_151699       | 7.23 eV    | 6.94 eV   |
| Ba1Er2Ni1O5.ICSD_69323     | 1.98 eV    | 1.84 eV   |
| Ba1Er2O10Si3.ICSD_167615   | 4.79 eV    | 4.40 eV   |
| Ba1Er2S4.ICSD_188656       | 1.74 eV    | 1.73 eV   |
| Ba1Er2Se4.ICSD_615844      | 1.37 eV    | 1.32 eV   |
| Ba1Er2Te4.ICSD_90337       | 0.78 eV    | 0.83 eV   |
| Ba1F10Te2.ICSD_81862       | 4.88 eV    | 4.05 eV   |
| Ba1F10Zr2.ICSD_202530      | 5.76 eV    | 5.33 eV   |
| Ba1F11Li1Zr2.ICSD_67512    | 5.73 eV    | 5.95 eV   |
| Ba1F12Sb2.ICSD_39346       | 4.08 eV    | 4.37 eV   |
| Ba1F11I1.ICSD_1128         | 4.02 eV    | 3.70 eV   |
| Ba1F1O6P1U1.ICSD_249983    | 3.10 eV    | 3.56 eV   |
| Ba1F2Fe2O7P2.ICSD_88824    | 3.61 eV    | 2.95 eV   |
| Ba1F2.ICSD_181246          | 6.61 eV    | 5.78 eV   |
| Ba1F2.ICSD_183923          | 6.81 eV    | 6.12 eV   |
| Ba1F2.ICSD_41650           | 5.34 eV    | 6.00 eV   |
| Ba1F3H1.ICSD_35409         | 5.50 eV    | 5.92 eV   |
| Ba1F3Li1.ICSD_45310        | 6.57 eV    | 6.17 eV   |
| Ba1F4Fe1.ICSD_82765        | 3.07 eV    | 3.21 eV   |
| Ba1F4Mg1.ICSD_182596       | 6.78 eV    | 6.75 eV   |
| Ba1F4Mg1.ICSD_182599       | 6.81 eV    | 6.73 eV   |
| Ba1F4Mn1.ICSD_182603       | 3.31 eV    | 2.91 eV   |
| Ba1F4Ni1.ICSD_261190       | 3.99 eV    | 3.73 eV   |
| Ba1F4O1Ti1.ICSD_72740      | 3.72 eV    | 4.04 eV   |
| Ba1F4Pd1.ICSD_108991       | 2.55 eV    | 2.50 eV   |
| Ba1F4Sn1.ICSD_166207       | 3.74 eV    | 3.95 eV   |
| Ba1F4Zn1.ICSD_402925       | 5.72 eV    | 5.50 eV   |
| Ba1F5Ga1.ICSD_200316       | 5.86 eV    | 5.62 eV   |
| Ba1F5Mn1.ICSD_38317        | 1.83 eV    | 2.93 eV   |
| Ba1F5Sb1.ICSD_68455        | 4.74 eV    | 4.42 eV   |
| Ba1F6Ge1.ICSD_26614        | 5.55 eV    | 5.20 eV   |
| Ba1F6Ni1.ICSD_35396        | 1.72 eV    | 2.97 eV   |
| Ba1F6Pb1.ICSD_25521        | 2.86 eV    | 3.45 eV   |
| Ba1F6Si1.ICSD_26613        | 7.38 eV    | 6.55 eV   |
| Ba1F6Sn1.ICSD_33788        | 4.45 eV    | 3.97 eV   |
| Ba1F6Te1.ICSD_88416        | 4.79 eV    | 4.52 eV   |
| Ba1F6Ti1.ICSD_33789        | 4.80 eV    | 4.44 eV   |
| Ba1F6Zr1.ICSD_1697         | 6.32 eV    | 6.16 eV   |
| Ba1F6Zr1.ICSD_36122        | 6.26 eV    | 5.95 eV   |
| Ba1F7Fe1Zn1.ICSD_36001     | 3.58 eV    | 3.27 eV   |
| Ba1F7Ga1Mn1.ICSD_201525    | 3.71 eV    | 3.56 eV   |
| Ba1F7Na1Zr1.ICSD_67515     | 6.07 eV    | 6.26 eV   |
| Ba1F7Ta1.ICSD_417251       | 5.82 eV    | 5.20 eV   |
| Ba1F8Tm2.ICSD_20103        | 1.97 eV    | 4.34 eV   |

Supplementary Table 661. Five-fold cross validated predictions for the band gap energy (55/277).

| system                    | calculated | predicted |
|---------------------------|------------|-----------|
| Ba1Fe1H1O5P1.ICSD_174376  | 3.18 eV    | 2.86 eV   |
| Ba1Fe1K1O3.ICSD_412877    | 2.14 eV    | 1.77 eV   |
| Ba1Fe1La2S5.ICSD_51602    | 0.95 eV    | 0.97 eV   |
| Ba1Fe1Nd2S5.ICSD_51605    | 1.11 eV    | 1.11 eV   |
| Ba1Fe1O10Si4.ICSD_156832  | 3.28 eV    | 3.00 eV   |
| Ba1Fe1O10Si4.ICSD_31205   | 3.31 eV    | 2.95 eV   |
| Ba1Fe1Pr2S5.ICSD_51604    | 1.27 eV    | 1.05 eV   |
| Ba1Fe2O4.ICSD_171001      | 1.54 eV    | 1.32 eV   |
| Ba1Fe2O4.ICSD_2769        | 1.54 eV    | 1.50 eV   |
| Ba1Fe2O5Y1.ICSD_281203    | 0.48 eV    | 0.99 eV   |
| Ba1Fe2S3.ICSD_16307       | 0.93 eV    | 0.71 eV   |
| Ba1Fe2S4.ICSD_23081       | 0.14 eV    | 0.54 eV   |
| Ba1Fe2Se3.ICSD_290594     | 0.61 eV    | 0.71 eV   |
| Ba1Fe2Se3.ICSD_290595     | 0.92 eV    | 0.78 eV   |
| Ba1Fe2Se3.ICSD_424315     | 0.62 eV    | 0.71 eV   |
| Ba1Fe4O8Sr1.ICSD_1943     | 1.62 eV    | 1.42 eV   |
| Ba1Fe4O8Sr1.ICSD_37011    | 1.63 eV    | 1.57 eV   |
| Ba1Ga1Ge1H1.ICSD_173573   | 0.21 eV    | 0.41 eV   |
| Ba1Ga1H1Si1.ICSD_173572   | 0.54 eV    | 0.48 eV   |
| Ba1Ga1H1Sn1.ICSD_173574   | 0.15 eV    | 0.40 eV   |
| Ba1Ga1H5.ICSD_240693      | 3.11 eV    | 3.22 eV   |
| Ba1Ga1La1O4.ICSD_180536   | 3.93 eV    | 3.70 eV   |
| Ba1Ga1Nd1O4.ICSD_69641    | 3.71 eV    | 3.43 eV   |
| Ba1Ga2P2.ICSD_380479      | 1.42 eV    | 0.84 eV   |
| Ba1Ga2S4.ICSD_615871      | 2.96 eV    | 2.73 eV   |
| Ba1Ga2Sb2.ICSD_280662     | 0.10 eV    | 0.30 eV   |
| Ba1Ga2Se4.ICSD_24386      | 1.86 eV    | 1.62 eV   |
| Ba1Ga4S7.ICSD_162960      | 2.57 eV    | 2.50 eV   |
| Ba1Gd2O5Pd1.ICSD_83233    | 2.41 eV    | 2.43 eV   |
| Ba1Gd2O5Pt1.ICSD_202171   | 2.92 eV    | 2.39 eV   |
| Ba1Gd2O7Sc2.ICSD_167604   | 3.61 eV    | 3.44 eV   |
| Ba1Gd2S4.ICSD_615879      | 1.62 eV    | 1.53 eV   |
| Ba1Ge1O3.ICSD_23925       | 3.49 eV    | 2.96 eV   |
| Ba1Ge1O8P2.ICSD_423040    | 4.07 eV    | 4.12 eV   |
| Ba1Ge2O5.ICSD_60061       | 1.74 eV    | 2.32 eV   |
| Ba1Ge2P2.ICSD_26416       | 0.49 eV    | 0.71 eV   |
| Ba1Ge2.ICSD_615881        | 0.47 eV    | 0.39 eV   |
| Ba1Ge3O9Sn1.ICSD_10384    | 2.70 eV    | 2.58 eV   |
| Ba1H1I1.ICSD_37203        | 2.80 eV    | 3.20 eV   |
| Ba1H2N2O5.ICSD_200864     | 2.43 eV    | 2.63 eV   |
| Ba1H2N2O5.ICSD_65641      | 2.42 eV    | 2.63 eV   |
| Ba1H2Ni3O10V2.ICSD_424330 | 2.22 eV    | 2.00 eV   |
| Ba1H2O14P4Si1.ICSD_41357  | 5.71 eV    | 5.18 eV   |
| Ba1H2O14Se4V2.ICSD_79518  | 2.11 eV    | 2.19 eV   |
| Ba1H2O4Sn2.ICSD_37115     | 2.15 eV    | 2.77 eV   |
| Ba1H2O8S2.ICSD_62494      | 5.58 eV    | 5.22 eV   |
| Ba1H2.ICSD_615909         | 2.87 eV    | 2.44 eV   |
| Ba1H3Li1.ICSD_23977       | 1.15 eV    | 1.88 eV   |
| Ba1H3Li1.ICSD_416463      | 2.21 eV    | 1.65 eV   |
| Ba1H3Na1Pd1.ICSD_165609   | 1.55 eV    | 1.93 eV   |

Supplementary Table 662. Five-fold cross validated predictions for the band gap energy (56/277).

| system                   | calculated | predicted |
|--------------------------|------------|-----------|
| Ba1H4I2O2.ICSD_407360    | 3.67 eV    | 3.66 eV   |
| Ba1H4O3.ICSD_63017       | 4.25 eV    | 4.16 eV   |
| Ba1H4O4P2.ICSD_59934     | 5.31 eV    | 5.04 eV   |
| Ba1H4O8P2.ICSD_1297      | 5.57 eV    | 5.10 eV   |
| Ba1H6O8Si2.ICSD_26971    | 5.06 eV    | 4.62 eV   |
| Ba1H7Re1.ICSD_247116     | 1.00 eV    | 2.48 eV   |
| Ba1H8O5.ICSD_67109       | 4.80 eV    | 4.45 eV   |
| Ba1H9Re1.ICSD_247104     | 3.85 eV    | 3.48 eV   |
| Ba1H9Re1.ICSD_247107     | 3.67 eV    | 2.65 eV   |
| Ba1H9Re1.ICSD_247109     | 2.89 eV    | 2.52 eV   |
| Ba1H9Re1.ICSD_247110     | 2.89 eV    | 3.60 eV   |
| Ba1H9Re1.ICSD_247111     | 0.77 eV    | 2.74 eV   |
| Ba1H9Re1.ICSD_75460      | 3.79 eV    | 3.42 eV   |
| Ba1Hf1N2.ICSD_184055     | 1.26 eV    | 1.12 eV   |
| Ba1Hf1O8P2.ICSD_245690   | 4.92 eV    | 4.57 eV   |
| Ba1Hf1O9Si3.ICSD_183835  | 4.70 eV    | 4.45 eV   |
| Ba1Hg1O2.ICSD_68616      | 2.17 eV    | 1.90 eV   |
| Ba1Hg1O2.ICSD_83411      | 2.26 eV    | 1.98 eV   |
| Ba1Hg1O5Ru1.ICSD_81070   | 1.03 eV    | 1.32 eV   |
| Ba1Hg1S2.ICSD_32648      | 1.15 eV    | 1.31 eV   |
| Ba1Hg1S4Sn1.ICSD_10456   | 1.70 eV    | 1.51 eV   |
| Ba1Ho2Ni1O5.ICSD_67930   | 1.97 eV    | 1.87 eV   |
| Ba1Ho2O4.ICSD_154812     | 3.23 eV    | 3.26 eV   |
| Ba1Ho2O5Pd1.ICSD_404497  | 2.31 eV    | 2.35 eV   |
| Ba1Ho2S4.ICSD_615930     | 1.74 eV    | 1.72 eV   |
| Ba1Ho2Te4.ICSD_90336     | 0.78 eV    | 0.79 eV   |
| Ba1I2O6.ICSD_23276       | 3.54 eV    | 3.06 eV   |
| Ba1I2.ICSD_15707         | 3.47 eV    | 2.85 eV   |
| Ba1I2.ICSD_36210         | 3.06 eV    | 2.71 eV   |
| Ba1I2.ICSD_79893         | 1.73 eV    | 2.92 eV   |
| Ba1I6U1.ICSD_78772       | 2.18 eV    | 1.95 eV   |
| Ba1In2La2O7.ICSD_95984   | 2.64 eV    | 2.53 eV   |
| Ba1In2Nd2O7.ICSD_168283  | 2.57 eV    | 2.39 eV   |
| Ba1In2O14P4.ICSD_180003  | 4.09 eV    | 3.81 eV   |
| Ba1In2P2.ICSD_260564     | 0.34 eV    | 0.56 eV   |
| Ba1In2Te4.ICSD_41168     | 0.98 eV    | 0.79 eV   |
| Ba1K1Nb1S4.ICSD_415335   | 2.21 eV    | 1.81 eV   |
| Ba1K1O4P1.ICSD_202430    | 4.96 eV    | 4.83 eV   |
| Ba1K1O4V1.ICSD_418461    | 3.97 eV    | 3.26 eV   |
| Ba1K1P1S4.ICSD_414639    | 2.32 eV    | 2.27 eV   |
| Ba1K1P1Se4.ICSD_414637   | 1.21 eV    | 1.56 eV   |
| Ba1K4O9Si3.ICSD_246254   | 4.22 eV    | 3.81 eV   |
| Ba1K4S8V2.ICSD_240378    | 1.76 eV    | 1.73 eV   |
| Ba1La1Sb2Se6.ICSD_421269 | 0.52 eV    | 0.68 eV   |
| Ba1La2Mn1S5.ICSD_90640   | 1.20 eV    | 0.98 eV   |
| Ba1La2O14Te5.ICSD_417616 | 3.23 eV    | 2.89 eV   |
| Ba1La2O5Pt1.ICSD_68794   | 2.84 eV    | 2.47 eV   |
| Ba1La2O5Zn1.ICSD_172768  | 3.26 eV    | 3.09 eV   |
| Ba1La2O7Sc2.ICSD_167599  | 3.80 eV    | 3.56 eV   |
| Ba1La2S5Zn1.ICSD_93711   | 1.40 eV    | 1.51 eV   |

Supplementary Table 663. Five-fold cross validated predictions for the band gap energy (57/277).

| system                         | calculated | predicted |
|--------------------------------|------------|-----------|
| Ba1Li1P1.ICSD_416890           | 0.97 eV    | 0.80 eV   |
| Ba1Li1P1.ICSD_56444            | 0.70 eV    | 0.90 eV   |
| Ba1Li1Sb1.ICSD_280574          | 0.70 eV    | 0.64 eV   |
| Ba1Li2Mg1O8P2.ICSD_236294      | 5.56 eV    | 4.88 eV   |
| Ba1Li2O4Si1.ICSD_180289        | 4.38 eV    | 4.21 eV   |
| Ba1Lu2S4.ICSD_422891           | 1.73 eV    | 1.69 eV   |
| Ba1Mg0.333Nb0.667O3.ICSD_95497 | 2.91 eV    | 3.01 eV   |
| Ba1Mg0.333O3Ta0.667.ICSD_95495 | 3.40 eV    | 3.47 eV   |
| Ba1Mg1Na2O8P2.ICSD_262716      | 5.02 eV    | 4.74 eV   |
| Ba1Mg1O4Si1.ICSD_73776         | 4.12 eV    | 4.34 eV   |
| Ba1Mg1O7Te2.ICSD_262408        | 1.84 eV    | 2.63 eV   |
| Ba1Mg2O8V2.ICSD_20429          | 3.54 eV    | 2.96 eV   |
| Ba1Mg2P2.ICSD_30914            | 1.14 eV    | 1.12 eV   |
| Ba1Mg2Sb2.ICSD_100047          | 0.85 eV    | 0.71 eV   |
| Ba1Mn1O3.ICSD_10250            | 0.73 eV    | 0.84 eV   |
| Ba1Mn1O3.ICSD_10331            | 1.94 eV    | 1.34 eV   |
| Ba1Mn1O3.ICSD_23874            | 0.67 eV    | 0.96 eV   |
| Ba1Mn1O3.ICSD_66822            | 0.85 eV    | 1.21 eV   |
| Ba1Mn1O3.ICSD_89995            | 1.96 eV    | 1.22 eV   |
| Ba1Mn1O4Rb1.ICSD_80640         | 1.71 eV    | 1.61 eV   |
| Ba1Mn1O7P2.ICSD_78658          | 3.89 eV    | 3.16 eV   |
| Ba1Mn1Pr2S5.ICSD_91229         | 1.12 eV    | 1.06 eV   |
| Ba1Mn1S2.ICSD_31453            | 1.54 eV    | 1.33 eV   |
| Ba1Mn2O14Si4Sr2.ICSD_39593     | 1.61 eV    | 2.49 eV   |
| Ba1Mn2O3.ICSD_10038            | 0.24 eV    | 1.13 eV   |
| Ba1Mn2O8.ICSD_23443            | 1.85 eV    | 1.14 eV   |
| Ba1Mn2O8.ICSD_24128            | 0.20 eV    | 1.30 eV   |
| Ba1Mo1O4.ICSD_16166            | 3.95 eV    | 3.13 eV   |
| Ba1Mo1O6Se1.ICSD_82255         | 2.99 eV    | 2.78 eV   |
| Ba1Mo1O8P2.ICSD_79507          | 0.82 eV    | 2.20 eV   |
| Ba1Mo2O11Se2.ICSD_82256        | 2.43 eV    | 2.44 eV   |
| Ba1Mo2O12P2.ICSD_62833         | 2.81 eV    | 2.63 eV   |
| Ba1Mo2O14P3.ICSD_153067        | 1.01 eV    | 2.08 eV   |
| Ba1Mo2O14P4.ICSD_72339         | 2.80 eV    | 1.90 eV   |
| Ba1Mo2O9Te1.ICSD_159460        | 2.74 eV    | 2.75 eV   |
| Ba1Mo4O16P2.ICSD_75147         | 2.09 eV    | 1.75 eV   |
| Ba1Mo6S8.ICSD_65775            | 0.15 eV    | 0.53 eV   |
| Ba1N10Si7.ICSD_405772          | 3.92 eV    | 3.71 eV   |
| Ba1N12P6Sr2.ICSD_415716        | 4.15 eV    | 3.68 eV   |
| Ba1N2O2Si2.ICSD_419450         | 2.99 eV    | 3.75 eV   |
| Ba1N2O4.ICSD_29510             | 2.37 eV    | 2.95 eV   |
| Ba1N2O6.ICSD_56087             | 3.56 eV    | 2.97 eV   |
| Ba1N2Si1.ICSD_170265           | 2.92 eV    | 2.56 eV   |
| Ba1N2Zr1.ICSD_74904            | 0.99 eV    | 1.11 eV   |
| Ba1N4P2.ICSD_414350            | 3.91 eV    | 3.42 eV   |
| Ba1N6.ICSD_412253              | 3.81 eV    | 3.23 eV   |
| Ba1N7Si4Y1.ICSD_98276          | 2.73 eV    | 3.01 eV   |
| Ba1N7Si4Yb1.ICSD_160649        | 0.09 eV    | 0.61 eV   |
| Ba1N8O1Si6.ICSD_415272         | 4.22 eV    | 3.80 eV   |
| Ba1N8Si6.ICSD_417444           | 3.26 eV    | 3.42 eV   |

Supplementary Table 664. Five-fold cross validated predictions for the band gap energy (58/277).

| system                        | calculated | predicted |
|-------------------------------|------------|-----------|
| Ba1Na1O7Sc1Si2_ICSD_166998    | 4.53 eV    | 4.57 eV   |
| Ba1Na1P1_ICSD_402227          | 0.84 eV    | 0.87 eV   |
| Ba1Na2O6Si2_ICSD_10217        | 4.16 eV    | 4.23 eV   |
| Ba1Nb0.67O3Sr0.33_ICSD_186191 | 3.03 eV    | 3.29 eV   |
| Ba1Nb2O11V2_ICSD_165097       | 2.33 eV    | 2.26 eV   |
| Ba1Nb2O6_ICSD_39272           | 2.64 eV    | 2.46 eV   |
| Ba1Nb2O6_ICSD_39320           | 3.00 eV    | 3.02 eV   |
| Ba1Nb8O14_ICSD_79976          | 0.31 eV    | 1.02 eV   |
| Ba1Nd2O5Pd1_ICSD_62609        | 2.64 eV    | 2.47 eV   |
| Ba1Nd2O5Pt1_ICSD_47178        | 2.73 eV    | 2.45 eV   |
| Ba1Nd2O5Zn1_ICSD_68808        | 3.21 eV    | 2.76 eV   |
| Ba1Nd2S4_ICSD_615994          | 1.78 eV    | 1.45 eV   |
| Ba1Nd2S5Zn1_ICSD_93714        | 1.13 eV    | 1.32 eV   |
| Ba1Ni1O2_ICSD_15760           | 1.98 eV    | 1.50 eV   |
| Ba1Ni1O3_ICSD_15761           | 1.46 eV    | 1.42 eV   |
| Ba1Ni1O3_ICSD_175             | 1.45 eV    | 1.44 eV   |
| Ba1Ni1O5Tb2_ICSD_66078        | 0.45 eV    | 1.72 eV   |
| Ba1Ni1O5Y2_ICSD_71327         | 1.95 eV    | 1.95 eV   |
| Ba1Ni2O8P2_ICSD_280167        | 3.29 eV    | 2.73 eV   |
| Ba1Ni2O8V2_ICSD_201621        | 2.36 eV    | 1.91 eV   |
| Ba1Ni4O8_ICSD_20898           | 0.20 eV    | 0.90 eV   |
| Ba1O13Ti6_ICSD_2922           | 2.92 eV    | 2.50 eV   |
| Ba1O14P4Ti2_ICSD_69103        | 2.86 eV    | 3.42 eV   |
| Ba1O14P4V2_ICSD_66538         | 1.51 eV    | 2.29 eV   |
| Ba1O14Sr4U3_ICSD_50812        | 3.05 eV    | 3.03 eV   |
| Ba1O1S1Zn1_ICSD_171239        | 2.42 eV    | 2.04 eV   |
| Ba1O1_ICSD_15301              | 2.75 eV    | 2.30 eV   |
| Ba1O1_ICSD_173921             | 2.36 eV    | 2.55 eV   |
| Ba1O1_ICSD_58663              | 2.09 eV    | 2.24 eV   |
| Ba1O2.8V1_ICSD_78164          | 0.55 eV    | 1.50 eV   |
| Ba1O2Zn1_ICSD_25812           | 2.78 eV    | 2.48 eV   |
| Ba1O2_ICSD_180398             | 2.22 eV    | 2.69 eV   |
| Ba1O2_ICSD_80750              | 2.23 eV    | 2.71 eV   |
| Ba1O3Pb1_ICSD_94312           | 0.21 eV    | 0.90 eV   |
| Ba1O3Pb1_ICSD_94313           | 0.19 eV    | 0.99 eV   |
| Ba1O3Pr1_ICSD_163752          | 1.64 eV    | 1.84 eV   |
| Ba1O3Pr1_ICSD_163753          | 0.32 eV    | 1.66 eV   |
| Ba1O3Se1_ICSD_54156           | 3.88 eV    | 3.52 eV   |
| Ba1O3Si1_ICSD_156705          | 3.04 eV    | 3.47 eV   |
| Ba1O3Si1_ICSD_156706          | 2.13 eV    | 3.38 eV   |
| Ba1O3Si1_ICSD_6245            | 4.53 eV    | 3.91 eV   |
| Ba1O3Tc1_ICSD_109077          | 0.31 eV    | 0.80 eV   |
| Ba1O3Te1_ICSD_10107           | 3.17 eV    | 3.10 eV   |
| Ba1O3Te1_ICSD_4320            | 2.76 eV    | 2.56 eV   |
| Ba1O3Th1_ICSD_29110           | 2.92 eV    | 3.04 eV   |
| Ba1O3Ti1_ICSD_100802          | 2.13 eV    | 2.10 eV   |
| Ba1O3Ti1_ICSD_154346          | 0.36 eV    | 1.92 eV   |
| Ba1O3Ti1_ICSD_186461          | 2.14 eV    | 2.12 eV   |
| Ba1O3Ti1_ICSD_31155           | 2.14 eV    | 2.08 eV   |
| Ba1O3Ti1_ICSD_34619           | 2.18 eV    | 2.20 eV   |

Supplementary Table 665. Five-fold cross validated predictions for the band gap energy (59/277).

| system                  | calculated | predicted |
|-------------------------|------------|-----------|
| Ba1O3Ti1_ICSD_55221     | 2.19 eV    | 2.22 eV   |
| Ba1O3Ti1_ICSD_73628     | 2.14 eV    | 2.14 eV   |
| Ba1O3Ti1_ICSD_73640     | 2.14 eV    | 2.13 eV   |
| Ba1O3Zr1_ICSD_90049     | 3.04 eV    | 2.81 eV   |
| Ba1O4P1Rb1_ICSD_72001   | 5.02 eV    | 4.67 eV   |
| Ba1O4S1_ICSD_186427     | 5.91 eV    | 5.76 eV   |
| Ba1O4S1_ICSD_23743      | 4.51 eV    | 4.64 eV   |
| Ba1O4S1_ICSD_33732      | 5.95 eV    | 5.73 eV   |
| Ba1O4Se1_ICSD_409810    | 3.69 eV    | 3.62 eV   |
| Ba1O4Si1Zn1_ICSD_73777  | 4.00 eV    | 3.83 eV   |
| Ba1O4Tb2_ICSD_78661     | 3.20 eV    | 3.27 eV   |
| Ba1O4U1_ICSD_36239      | 3.01 eV    | 2.94 eV   |
| Ba1O4W1_ICSD_155512     | 4.69 eV    | 3.34 eV   |
| Ba1O4W1_ICSD_155516     | 2.45 eV    | 3.55 eV   |
| Ba1O4Y2_ICSD_89640      | 3.24 eV    | 3.43 eV   |
| Ba1O5Pd1Pr2_ICSD_202172 | 2.52 eV    | 2.23 eV   |
| Ba1O5Pd1Tb2_ICSD_202173 | 2.41 eV    | 2.32 eV   |
| Ba1O5Pd1Y2_ICSD_202819  | 2.37 eV    | 2.26 eV   |
| Ba1O5Se2_ICSD_54157     | 3.38 eV    | 3.09 eV   |
| Ba1O5Si2_ICSD_10162     | 4.40 eV    | 4.48 eV   |
| Ba1O5Tb2Zn1_ICSD_69721  | 3.43 eV    | 3.15 eV   |
| Ba1O5Ti2_ICSD_157775    | 2.17 eV    | 2.09 eV   |
| Ba1O5Ti2_ICSD_162369    | 3.19 eV    | 2.71 eV   |
| Ba1O5Ti2_ICSD_2356      | 0.63 eV    | 1.67 eV   |
| Ba1O5Ti2_ICSD_281548    | 2.21 eV    | 2.24 eV   |
| Ba1O6P1V1_ICSD_66699    | 2.47 eV    | 2.72 eV   |
| Ba1O6P2_ICSD_15714      | 5.27 eV    | 5.15 eV   |
| Ba1O6Sb2_ICSD_74541     | 2.89 eV    | 2.34 eV   |
| Ba1O6Te2_ICSD_8017      | 1.74 eV    | 2.27 eV   |
| Ba1O6Ti1U1_ICSD_156646  | 2.74 eV    | 2.73 eV   |
| Ba1O6V2_ICSD_80938      | 2.76 eV    | 2.21 eV   |
| Ba1O7P2Zn1_ICSD_39396   | 4.75 eV    | 4.70 eV   |
| Ba1O7Si2V1_ICSD_78029   | 2.17 eV    | 2.39 eV   |
| Ba1O7Te2Zn1_ICSD_262409 | 1.91 eV    | 2.39 eV   |
| Ba1O7U2_ICSD_22206      | 2.91 eV    | 2.56 eV   |
| Ba1O8P2Sn1_ICSD_420129  | 3.18 eV    | 3.49 eV   |
| Ba1O8P2Th1_ICSD_421965  | 5.21 eV    | 4.59 eV   |
| Ba1O8P2Zn2_ICSD_300159  | 4.50 eV    | 4.46 eV   |
| Ba1O8P2Zr1_ICSD_153124  | 4.15 eV    | 4.23 eV   |
| Ba1O8P2Zr1_ICSD_173842  | 3.83 eV    | 4.08 eV   |
| Ba1O8Si2U1_ICSD_79817   | 3.55 eV    | 3.02 eV   |
| Ba1O8V3_ICSD_80299      | 1.58 eV    | 2.03 eV   |
| Ba1O8V3_ICSD_82063      | 1.59 eV    | 2.02 eV   |
| Ba1O9Si3Sn1_ICSD_10385  | 3.36 eV    | 3.37 eV   |
| Ba1O9Si3Ti1_ICSD_290229 | 3.55 eV    | 3.85 eV   |
| Ba1O9Si4_ICSD_80067     | 4.35 eV    | 4.31 eV   |
| Ba1O9Te1W2_ICSD_281502  | 3.25 eV    | 2.92 eV   |
| Ba1O9Ti4_ICSD_49575     | 3.20 eV    | 2.50 eV   |
| Ba1O9V4_ICSD_173002     | 0.96 eV    | 1.41 eV   |
| Ba1P10_ICSD_35295       | 1.29 eV    | 1.09 eV   |

Supplementary Table 666. Five-fold cross validated predictions for the band gap energy (60/277).

| system                  | calculated | predicted |
|-------------------------|------------|-----------|
| Ba1P3Pt2.ICSD.62520     | 0.26 eV    | 0.47 eV   |
| Ba1P3.ICSD.23618        | 0.56 eV    | 0.53 eV   |
| Ba1P4Te2.ICSD.412643    | 1.17 eV    | 0.93 eV   |
| Ba1P8.ICSD.96544        | 0.89 eV    | 0.96 eV   |
| Ba1Pd1S2.ICSD.63588     | 0.88 eV    | 1.08 eV   |
| Ba1Pd2S4.ICSD.79930     | 1.08 eV    | 1.08 eV   |
| Ba1Pr2S5Zn1.ICSD.93713  | 1.37 eV    | 1.29 eV   |
| Ba1Pt2S3.ICSD.201146    | 1.28 eV    | 1.39 eV   |
| Ba1Pt2S3.ICSD.55077     | 1.61 eV    | 1.39 eV   |
| Ba1Rb1S4Ta1.ICSD.421845 | 2.59 eV    | 2.10 eV   |
| Ba1S1.ICSD.52690        | 2.15 eV    | 1.66 eV   |
| Ba1S2Sn1.ICSD.2587      | 1.68 eV    | 1.38 eV   |
| Ba1S2.ICSD.2004         | 1.58 eV    | 1.48 eV   |
| Ba1S3Sn2.ICSD.26333     | 1.26 eV    | 1.41 eV   |
| Ba1S3Te1.ICSD.8         | 1.91 eV    | 1.67 eV   |
| Ba1S3U1.ICSD.23289      | 1.93 eV    | 1.30 eV   |
| Ba1S3V1.ICSD.154183     | 0.30 eV    | 0.63 eV   |
| Ba1S3V1.ICSD.154184     | 0.34 eV    | 0.60 eV   |
| Ba1S3V1.ICSD.616099     | 0.24 eV    | 0.52 eV   |
| Ba1S3Zr1.ICSD.165977    | 1.02 eV    | 0.97 eV   |
| Ba1S3.ICSD.23637        | 1.37 eV    | 1.23 eV   |
| Ba1S3.ICSD.26765        | 1.02 eV    | 1.54 eV   |
| Ba1S4Sb2.ICSD.38372     | 1.45 eV    | 1.55 eV   |
| Ba1S4Tb2.ICSD.616078    | 1.75 eV    | 1.64 eV   |
| Ba1S4Y2.ICSD.616101     | 1.76 eV    | 1.53 eV   |
| Ba1Sb1Te3.ICSD.10506    | 0.39 eV    | 0.56 eV   |
| Ba1Sc2Te4.ICSD.416326   | 0.67 eV    | 0.77 eV   |
| Ba1Se1.ICSD.43655       | 1.95 eV    | 1.63 eV   |
| Ba1Se1.ICSD.52695       | 1.21 eV    | 1.50 eV   |
| Ba1Se2.ICSD.16358       | 0.62 eV    | 1.05 eV   |
| Ba1Se3.ICSD.16359       | 0.93 eV    | 0.99 eV   |
| Ba1Se4Y2.ICSD.422980    | 1.39 eV    | 1.28 eV   |
| Ba1Se4Yb2.ICSD.616135   | 0.53 eV    | 1.07 eV   |
| Ba1Si2.ICSD.168407      | 0.77 eV    | 0.64 eV   |
| Ba1Tb2Te4.ICSD.90333    | 0.78 eV    | 0.78 eV   |
| Ba1Te1.ICSD.43656       | 1.59 eV    | 1.23 eV   |
| Ba1Te1.ICSD.616164      | 0.78 eV    | 1.28 eV   |
| Ba1Te2.ICSD.80280       | 0.34 eV    | 0.67 eV   |
| Ba1Te3.ICSD.36366       | 0.74 eV    | 0.50 eV   |
| Ba1Te4Y2.ICSD.90335     | 0.80 eV    | 0.78 eV   |
| Ba2Bi1Dy1O6.ICSD.68612  | 1.87 eV    | 2.12 eV   |
| Ba2Bi1Fe1S5.ICSD.261419 | 1.22 eV    | 1.44 eV   |
| Ba2Bi1Ir1O6.ICSD.174290 | 0.44 eV    | 0.70 eV   |
| Ba2Bi1O6Sb1.ICSD.172761 | 1.78 eV    | 1.80 eV   |
| Ba2Bi1O6Sb1.ICSD.172762 | 1.64 eV    | 1.44 eV   |
| Ba2Bi1O6Ta1.ICSD.153120 | 2.69 eV    | 3.00 eV   |
| Ba2Bi1O6Ta1.ICSD.154150 | 2.78 eV    | 2.74 eV   |
| Ba2Bi1O6Y1.ICSD.65555   | 1.93 eV    | 2.54 eV   |
| Ba2Bi1O6Yb1.ICSD.80902  | 0.30 eV    | 0.79 eV   |
| Ba2Bi2O6.ICSD.28164     | 0.10 eV    | 0.84 eV   |

Supplementary Table 667. Five-fold cross validated predictions for the band gap energy (61/277).

| system                      | calculated | predicted |
|-----------------------------|------------|-----------|
| Ba2Bi2Zn1.ICSD.421424       | 0.18 eV    | 0.29 eV   |
| Ba2Br1Cu1O2.ICSD.67395      | 2.62 eV    | 2.38 eV   |
| Ba2Br1H3.ICSD.415127        | 2.13 eV    | 2.38 eV   |
| Ba2Br1In1O3.ICSD.81878      | 1.99 eV    | 2.10 eV   |
| Ba2Br1N1.ICSD.262056        | 1.14 eV    | 1.35 eV   |
| Ba2Br2F10Pb4.ICSD.411087    | 3.28 eV    | 3.06 eV   |
| Ba2Br2O1.ICSD.423479        | 3.31 eV    | 3.89 eV   |
| Ba2Br5Cs1.ICSD.402191       | 4.44 eV    | 4.02 eV   |
| Ba2C2Co1F2O6.ICSD.95721     | 3.92 eV    | 3.79 eV   |
| Ba2C2F3O6Y1.ICSD.72733      | 5.27 eV    | 4.94 eV   |
| Ba2C3Ce1F1O9.ICSD.72446     | 4.62 eV    | 4.29 eV   |
| Ba2C3Cs2O9.ICSD.73170       | 4.35 eV    | 4.12 eV   |
| Ba2C3F1La1O9.ICSD.250059    | 4.60 eV    | 4.66 eV   |
| Ba2C4H12N2O10S2.ICSD.59807  | 3.60 eV    | 4.04 eV   |
| Ba2Ca1Cr2Cu1F14.ICSD.419545 | 2.29 eV    | 2.73 eV   |
| Ba2Ca1Cu1F14Fe2.ICSD.202761 | 2.97 eV    | 2.41 eV   |
| Ba2Ca1Ir1O6.ICSD.74029      | 0.42 eV    | 0.59 eV   |
| Ba2Ca1Mo1O6.ICSD.45317      | 2.12 eV    | 2.29 eV   |
| Ba2Ca1N4W1.ICSD.409472      | 1.84 eV    | 1.75 eV   |
| Ba2Ca1O6Pd3.ICSD.73082      | 2.07 eV    | 1.48 eV   |
| Ba2Ca1O6Te1.ICSD.246112     | 3.00 eV    | 2.75 eV   |
| Ba2Ca1O6W1.ICSD.246111      | 2.86 eV    | 3.03 eV   |
| Ba2Ca1O6W1.ICSD.246117      | 2.95 eV    | 2.95 eV   |
| Ba2Cd1O6U1.ICSD.167503      | 2.88 eV    | 2.51 eV   |
| Ba2Cd1S3.ICSD.66654         | 2.14 eV    | 1.80 eV   |
| Ba2Cd1Se3.ICSD.66653        | 1.62 eV    | 1.46 eV   |
| Ba2Cd1Te3.ICSD.88849        | 1.44 eV    | 1.26 eV   |
| Ba2Cd2K1Sb3.ICSD.420620     | 0.25 eV    | 0.34 eV   |
| Ba2Ce1Cl7.ICSD.000          | 4.74 eV    | 4.39 eV   |
| Ba2Ce1O6Pt1.ICSD.66408      | 2.19 eV    | 2.12 eV   |
| Ba2Cl1Co2F7.ICSD.79479      | 3.94 eV    | 3.70 eV   |
| Ba2Cl1Co4O7.ICSD.245991     | 1.09 eV    | 1.24 eV   |
| Ba2Cl1Cu1O2.ICSD.1038       | 2.65 eV    | 2.19 eV   |
| Ba2Cl1F3.ICSD.183926        | 5.73 eV    | 5.34 eV   |
| Ba2Cl1F7Mn1Ni1.ICSD.79480   | 2.20 eV    | 3.01 eV   |
| Ba2Cl1F7Ni2.ICSD.84782      | 3.61 eV    | 3.35 eV   |
| Ba2Cl1F7Zn2.ICSD.79478      | 4.76 eV    | 4.93 eV   |
| Ba2Cl1H3.ICSD.416893        | 2.09 eV    | 2.75 eV   |
| Ba2Cl1In1O3.ICSD.81877      | 2.08 eV    | 2.19 eV   |
| Ba2Cl1Mn1O7Si2.ICSD.281430  | 1.33 eV    | 2.58 eV   |
| Ba2Cl1N1.ICSD.262135        | 1.11 eV    | 1.71 eV   |
| Ba2Cl1P1.ICSD.28134         | 1.25 eV    | 1.18 eV   |
| Ba2Cl1P7.ICSD.24398         | 1.57 eV    | 1.33 eV   |
| Ba2Cl2Co1O6Se2.ICSD.280965  | 3.81 eV    | 2.81 eV   |
| Ba2Cl7Er1.ICSD.82494        | 4.95 eV    | 4.60 eV   |
| Ba2Cl7Gd1.ICSD.82495        | 4.59 eV    | 4.66 eV   |
| Ba2Cl7La1.ICSD.000          | 4.81 eV    | 4.39 eV   |
| Ba2Cl7Sc1.ICSD.408056       | 4.11 eV    | 4.18 eV   |
| Ba2Cl7Sc1.ICSD.56832        | 4.16 eV    | 4.15 eV   |
| Ba2Cl7Y1.ICSD.000           | 4.71 eV    | 4.82 eV   |

Supplementary Table 668. Five-fold cross validated predictions for the band gap energy (62/277).

| system                    | calculated | predicted |
|---------------------------|------------|-----------|
| Ba2Co1F6_ICSD_21057       | 3.77 eV    | 3.38 eV   |
| Ba2Co1Ge2O7_ICSD_290483   | 2.70 eV    | 2.13 eV   |
| Ba2Co1O4_ICSD_16234       | 1.61 eV    | 1.72 eV   |
| Ba2Co1O4_ICSD_92321       | 1.84 eV    | 1.62 eV   |
| Ba2Co1O6Re1_ICSD_109254   | 0.29 eV    | 1.28 eV   |
| Ba2Co1O7Si2_ICSD_281293   | 3.79 eV    | 3.24 eV   |
| Ba2Co1O7Si2_ICSD_81472    | 3.70 eV    | 3.07 eV   |
| Ba2Cr1O4_ICSD_73892       | 1.75 eV    | 1.62 eV   |
| Ba2Cr1O6Ta1_ICSD_74410    | 2.23 eV    | 2.24 eV   |
| Ba2Cr7O14_ICSD_2766       | 0.19 eV    | 1.33 eV   |
| Ba2Cs1Nb3O10_ICSD_93676   | 1.64 eV    | 2.05 eV   |
| Ba2Cu1F6_ICSD_100028      | 2.69 eV    | 2.39 eV   |
| Ba2Cu1Ge2O7_ICSD_77132    | 1.53 eV    | 1.45 eV   |
| Ba2Cu1I1O2_ICSD_67394     | 2.58 eV    | 2.02 eV   |
| Ba2Cu1O6Te1_ICSD_88703    | 0.27 eV    | 0.93 eV   |
| Ba2Cu1O6U1_ICSD_157853    | 1.38 eV    | 1.34 eV   |
| Ba2Cu1O6U1_ICSD_169534    | 1.37 eV    | 1.37 eV   |
| Ba2Cu1O6W1_ICSD_33569     | 0.91 eV    | 1.07 eV   |
| Ba2Cu1O6W1_ICSD_72813     | 0.91 eV    | 1.11 eV   |
| Ba2Cu1O7Si2_ICSD_20905    | 1.43 eV    | 1.53 eV   |
| Ba2Cu1O7Si2_ICSD_97762    | 1.43 eV    | 1.64 eV   |
| Ba2Cu1O8P2_ICSD_81457     | 1.47 eV    | 1.71 eV   |
| Ba2Cu2O12Si4_ICSD_71535   | 1.56 eV    | 1.49 eV   |
| Ba2Cu2S5U1_ICSD_418464    | 0.92 eV    | 1.09 eV   |
| Ba2Cu3Li1O6_ICSD_401239   | 0.37 eV    | 0.95 eV   |
| Ba2Cu3Na1O6_ICSD_72328    | 0.37 eV    | 0.87 eV   |
| Ba2Cu3S6V1_ICSD_83969     | 0.92 eV    | 0.97 eV   |
| Ba2Cu5F14_ICSD_202138     | 1.93 eV    | 2.09 eV   |
| Ba2Dy1Ga1Se5_ICSD_262886  | 1.68 eV    | 1.57 eV   |
| Ba2Dy1Nb1O6_ICSD_109156   | 3.09 eV    | 2.91 eV   |
| Ba2Dy1O6Sb1_ICSD_150863   | 3.46 eV    | 3.29 eV   |
| Ba2Er1Ga1Se5_ICSD_262887  | 1.69 eV    | 1.66 eV   |
| Ba2Er1Nb1O6_ICSD_245456   | 3.10 eV    | 3.12 eV   |
| Ba2Er1O6Ru1_ICSD_59743    | 1.09 eV    | 1.13 eV   |
| Ba2Er1O6Sb1_ICSD_245459   | 3.37 eV    | 3.35 eV   |
| Ba2F10I2Pb4_ICSD_411088   | 2.84 eV    | 3.09 eV   |
| Ba2F10Mg3_ICSD_50228      | 6.89 eV    | 6.74 eV   |
| Ba2F10Ni3_ICSD_23364      | 4.21 eV    | 3.68 eV   |
| Ba2F18Ni7_ICSD_65610      | 4.21 eV    | 3.40 eV   |
| Ba2F18Zn7_ICSD_40925      | 5.40 eV    | 5.20 eV   |
| Ba2F1In1O3_ICSD_79261     | 2.21 eV    | 2.20 eV   |
| Ba2F1N1_ICSD_262049       | 1.09 eV    | 1.24 eV   |
| Ba2F2Fe2O1S2_ICSD_249689  | 1.58 eV    | 1.47 eV   |
| Ba2F2Fe2O1Se2_ICSD_249687 | 1.57 eV    | 1.48 eV   |
| Ba2F2Mn2O1Se2_ICSD_183149 | 2.05 eV    | 1.58 eV   |
| Ba2F2S3Sn1_ICSD_171343    | 2.05 eV    | 1.93 eV   |
| Ba2F2Se3Sn1_ICSD_171344   | 1.55 eV    | 1.43 eV   |
| Ba2F4O3W1_ICSD_33271      | 3.70 eV    | 3.45 eV   |
| Ba2F6Ni1_ICSD_21056       | 3.87 eV    | 3.36 eV   |
| Ba2F6O1Ti1_ICSD_72150     | 3.85 eV    | 4.00 eV   |

Supplementary Table 669. Five-fold cross validated predictions for the band gap energy (63/277).

| system                    | calculated | predicted |
|---------------------------|------------|-----------|
| Ba2F6Pd1_ICSD_88802       | 2.84 eV    | 2.89 eV   |
| Ba2F6Zn1_ICSD_21054       | 5.87 eV    | 5.32 eV   |
| Ba2F8Zr1_ICSD_85720       | 5.94 eV    | 5.90 eV   |
| Ba2Fe1Ge2O7_ICSD_22358    | 1.27 eV    | 2.18 eV   |
| Ba2Fe1Mo1O6_ICSD_246543   | 0.41 eV    | 1.09 eV   |
| Ba2Fe1O6U1_ICSD_27018     | 1.92 eV    | 1.76 eV   |
| Ba2Fe1O6W1_ICSD_95518     | 1.61 eV    | 1.91 eV   |
| Ba2Fe1O6W1_ICSD_99061     | 2.54 eV    | 1.94 eV   |
| Ba2Fe1S3_ICSD_615850      | 1.74 eV    | 1.09 eV   |
| Ba2Fe1S5Sb1_ICSD_261418   | 1.14 eV    | 1.39 eV   |
| Ba2Fe1Se3_ICSD_615861     | 1.60 eV    | 1.29 eV   |
| Ba2Ga1H1O14P4_ICSD_280043 | 5.10 eV    | 4.64 eV   |
| Ba2Ga2S5_ICSD_38256       | 2.80 eV    | 2.67 eV   |
| Ba2Gd1Nb1O6_ICSD_109155   | 3.02 eV    | 2.86 eV   |
| Ba2Gd1Nb1O6_ICSD_172405   | 3.15 eV    | 2.97 eV   |
| Ba2Ge1P2_ICSD_35150       | 0.59 eV    | 0.73 eV   |
| Ba2Ge1S4_ICSD_615898      | 2.24 eV    | 2.37 eV   |
| Ba2Ge1Se2Te2_ICSD_414165  | 0.81 eV    | 1.03 eV   |
| Ba2Ge1Se4_ICSD_414166     | 1.38 eV    | 1.45 eV   |
| Ba2Ge2Mg1O7_ICSD_419312   | 3.56 eV    | 3.40 eV   |
| Ba2Ge2Mn1O7_ICSD_184630   | 2.15 eV    | 2.18 eV   |
| Ba2Ge2O1S6Zn1_ICSD_14174  | 2.08 eV    | 2.30 eV   |
| Ba2Ge2O7Zn1_ICSD_420550   | 3.37 eV    | 3.19 eV   |
| Ba2Ge2O8Ti1_ICSD_281271   | 3.66 eV    | 3.62 eV   |
| Ba2Ge2O8Ti1_ICSD_39133    | 3.66 eV    | 3.61 eV   |
| Ba2Ge2Se5_ICSD_410791     | 1.27 eV    | 1.36 eV   |
| Ba2Ge2Te5_ICSD_59001      | 0.61 eV    | 0.79 eV   |
| Ba2Ge4S10_ICSD_66868      | 2.16 eV    | 1.98 eV   |
| Ba2H1N1_ICSD_67510        | 1.09 eV    | 1.20 eV   |
| Ba2H3I1_ICSD_423520       | 2.19 eV    | 2.46 eV   |
| Ba2H4Pd1_ICSD_165182      | 1.59 eV    | 1.96 eV   |
| Ba2H7O7Ti1_ICSD_411058    | 2.50 eV    | 2.86 eV   |
| Ba2Hf1S4_ICSD_80652       | 0.87 eV    | 1.38 eV   |
| Ba2Hg1S3_ICSD_32647       | 1.35 eV    | 1.59 eV   |
| Ba2Ho1Nb1O6_ICSD_109157   | 3.09 eV    | 2.98 eV   |
| Ba2Ho1O6Ru1_ICSD_99638    | 1.10 eV    | 1.10 eV   |
| Ba2Ho1O6Sb1_ICSD_150862   | 3.44 eV    | 3.39 eV   |
| Ba2Ho1O6Ta1_ICSD_158358   | 3.56 eV    | 3.47 eV   |
| Ba2Ho1O6Ta1_ICSD_158359   | 3.50 eV    | 3.43 eV   |
| Ba2I1Na1O6_ICSD_425446    | 2.21 eV    | 3.07 eV   |
| Ba2I2O1_ICSD_391434       | 3.03 eV    | 2.86 eV   |
| Ba2In1Nb1O6_ICSD_172166   | 3.65 eV    | 3.10 eV   |
| Ba2In1O6Ru1_ICSD_15260    | 1.31 eV    | 1.04 eV   |
| Ba2In1O6Ta1_ICSD_261481   | 4.10 eV    | 3.57 eV   |
| Ba2In1Sb1Se5_ICSD_425179  | 0.80 eV    | 0.97 eV   |
| Ba2In1Se5Y1_ICSD_262888   | 1.19 eV    | 1.21 eV   |
| Ba2In2O5_ICSD_89438       | 1.06 eV    | 1.68 eV   |
| Ba2In2Se5_ICSD_67187      | 1.44 eV    | 1.20 eV   |
| Ba2Ir1La1O6_ICSD_152678   | 0.35 eV    | 0.31 eV   |
| Ba2Ir1La1O6_ICSD_174140   | 0.19 eV    | 0.47 eV   |

Supplementary Table 670. Five-fold cross validated predictions for the band gap energy (64/277).

| system                   | calculated | predicted |
|--------------------------|------------|-----------|
| Ba2Ir1O6Pr1_ICSD_150323  | 0.19 eV    | 0.27 eV   |
| Ba2Ir1O6Pr1_ICSD_155828  | 0.20 eV    | 0.14 eV   |
| Ba2Ir1O6Sr1_ICSD_74030   | 0.52 eV    | 0.48 eV   |
| Ba2K8O24U6_ICSD_91785    | 2.87 eV    | 2.90 eV   |
| Ba2La1O6Ru1_ICSD_100793  | 1.27 eV    | 1.19 eV   |
| Ba2La1O6Ru1_ICSD_155549  | 1.30 eV    | 1.01 eV   |
| Ba2La1O6Ru1_ICSD_37028   | 0.79 eV    | 1.06 eV   |
| Ba2La1O6Sb1_ICSD_153136  | 3.74 eV    | 3.26 eV   |
| Ba2La1O6Ta1_ICSD_160168  | 2.86 eV    | 3.52 eV   |
| Ba2La1O6Ta1_ICSD_160169  | 2.86 eV    | 3.32 eV   |
| Ba2La1O6Ta1_ICSD_160170  | 3.68 eV    | 3.66 eV   |
| Ba2Li1N4Re1_ICSD_411453  | 1.82 eV    | 1.67 eV   |
| Ba2Li1O6Re1_ICSD_109259  | 1.91 eV    | 1.92 eV   |
| Ba2Li3N4Nb1_ICSD_75516   | 2.41 eV    | 2.13 eV   |
| Ba2Li3N4Ta1_ICSD_75031   | 2.39 eV    | 2.18 eV   |
| Ba2Lu1Nb1O6_ICSD_109161  | 0.98 eV    | 2.76 eV   |
| Ba2Lu1O6Ru1_ICSD_202869  | 1.05 eV    | 0.75 eV   |
| Ba2Mg1O6U1_ICSD_23099    | 3.07 eV    | 2.92 eV   |
| Ba2Mg1O6W1_ICSD_183771   | 2.91 eV    | 2.97 eV   |
| Ba2Mg1O7Si2_ICSD_183983  | 4.44 eV    | 4.39 eV   |
| Ba2Mg1O7Si2_ICSD_81117   | 4.46 eV    | 4.47 eV   |
| Ba2Mn1O3_ICSD_15508      | 1.65 eV    | 1.32 eV   |
| Ba2Mn1S3_ICSD_26231      | 1.86 eV    | 1.71 eV   |
| Ba2Mn1Se3_ICSD_26230     | 1.66 eV    | 1.54 eV   |
| Ba2Mn1Te3_ICSD_1151      | 1.29 eV    | 0.95 eV   |
| Ba2Mo1Nd1O6_ICSD_172390  | 0.12 eV    | 2.00 eV   |
| Ba2Mo1Ni1O6_ICSD_98192   | 2.20 eV    | 1.86 eV   |
| Ba2N2Zn1_ICSD_80377      | 0.61 eV    | 0.77 eV   |
| Ba2N3Nb1_ICSD_74906      | 1.99 eV    | 1.68 eV   |
| Ba2N3Ta1_ICSD_74503      | 2.03 eV    | 1.74 eV   |
| Ba2N3V1_ICSD_80177       | 1.46 eV    | 1.37 eV   |
| Ba2N8Si5_ICSD_401501     | 2.88 eV    | 2.93 eV   |
| Ba2Na1Nb5O15_ICSD_53267  | 2.49 eV    | 2.52 eV   |
| Ba2Na1Ni3O6_ICSD_59588   | 1.06 eV    | 1.48 eV   |
| Ba2Na1O6Re1_ICSD_200876  | 1.97 eV    | 1.72 eV   |
| Ba2Nb1O6Tb1_ICSD_245455  | 3.15 eV    | 2.94 eV   |
| Ba2Nb1O6Y1_ICSD_172407   | 3.08 eV    | 3.15 eV   |
| Ba2Nb2O10Te1_ICSD_405153 | 3.02 eV    | 3.03 eV   |
| Ba2Nb6O21Te2_ICSD_405107 | 2.41 eV    | 2.71 eV   |
| Ba2Nd1O6Ru1_ICSD_155551  | 0.33 eV    | 0.92 eV   |
| Ba2Ni1O6Te1_ICSD_25005   | 2.27 eV    | 2.17 eV   |
| Ba2Ni1O6U1_ICSD_169535   | 2.61 eV    | 2.11 eV   |
| Ba2Ni1O6W1_ICSD_24984    | 3.06 eV    | 2.66 eV   |
| Ba2O10Si4_ICSD_100314    | 4.74 eV    | 4.35 eV   |
| Ba2O11Te2V2_ICSD_261183  | 3.27 eV    | 2.85 eV   |
| Ba2O13Ti6_ICSD_300030    | 1.01 eV    | 1.58 eV   |
| Ba2O21Ta6Te2_ICSD_405108 | 3.03 eV    | 2.88 eV   |
| Ba2O3Pd1_ICSD_202812     | 0.61 eV    | 1.31 eV   |
| Ba2O3Zn1_ICSD_36659      | 3.10 eV    | 2.53 eV   |
| Ba2O4Pb1_ICSD_66544      | 1.23 eV    | 1.55 eV   |

Supplementary Table 671. Five-fold cross validated predictions for the band gap energy (65/277).

| system                   | calculated | predicted |
|--------------------------|------------|-----------|
| Ba2O4Sn1_ICSD_81849      | 2.08 eV    | 2.00 eV   |
| Ba2O4Ti1_ICSD_2625       | 3.62 eV    | 2.93 eV   |
| Ba2O4V1_ICSD_72625       | 1.24 eV    | 2.42 eV   |
| Ba2O4Zr1_ICSD_39707      | 2.98 eV    | 3.00 eV   |
| Ba2O5Re1_ICSD_202393     | 0.44 eV    | 1.31 eV   |
| Ba2O5Ti2_ICSD_6322       | 0.59 eV    | 1.28 eV   |
| Ba2O5W1_ICSD_62489       | 2.87 eV    | 3.13 eV   |
| Ba2O6Pb1U1_ICSD_167504   | 2.15 eV    | 2.17 eV   |
| Ba2O6Pr1Sb1_ICSD_153137  | 3.11 eV    | 2.82 eV   |
| Ba2O6Ru1Y1_ICSD_202864   | 1.11 eV    | 0.96 eV   |
| Ba2O6Sb1Tb1_ICSD_38332   | 3.51 eV    | 3.11 eV   |
| Ba2O6Sb1Y1_ICSD_84650    | 3.54 eV    | 3.26 eV   |
| Ba2O6Sr1Te1_ICSD_246109  | 3.12 eV    | 2.98 eV   |
| Ba2O6Sr1W1_ICSD_246114   | 3.06 eV    | 3.19 eV   |
| Ba2O6Ta1Y1_ICSD_171176   | 3.54 eV    | 3.32 eV   |
| Ba2O6Ta1Y1_ICSD_261453   | 3.48 eV    | 3.54 eV   |
| Ba2O6U1Zn1_ICSD_167502   | 2.89 eV    | 2.75 eV   |
| Ba2O6W1Zn1_ICSD_423034   | 2.99 eV    | 2.87 eV   |
| Ba2O7P2_ICSD_261125      | 5.14 eV    | 4.82 eV   |
| Ba2O7Si2Zn1_ICSD_409588  | 4.27 eV    | 4.12 eV   |
| Ba2O7U2_ICSD_63076       | 3.15 eV    | 2.82 eV   |
| Ba2O8Si2Ti1_ICSD_201844  | 4.33 eV    | 3.72 eV   |
| Ba2O8Si2V1_ICSD_51479    | 2.31 eV    | 2.76 eV   |
| Ba2O9P2Te1_ICSD_416032   | 3.42 eV    | 3.59 eV   |
| Ba2O9V3_ICSD_404713      | 1.29 eV    | 1.78 eV   |
| Ba2Re6S11_ICSD_201072    | 1.31 eV    | 1.15 eV   |
| Ba2S3Zn1_ICSD_653999     | 2.08 eV    | 2.01 eV   |
| Ba2S3_ICSD_70058         | 1.59 eV    | 1.66 eV   |
| Ba2S4Si1_ICSD_42661      | 3.00 eV    | 2.70 eV   |
| Ba2S4Sn1_ICSD_16273      | 2.05 eV    | 1.92 eV   |
| Ba2S4Sn1_ICSD_42036      | 1.68 eV    | 1.90 eV   |
| Ba2S4Ti1_ICSD_616084     | 2.11 eV    | 1.64 eV   |
| Ba2S4Zr1_ICSD_80651      | 0.61 eV    | 1.23 eV   |
| Ba2Sb2Zn1_ICSD_421425    | 0.38 eV    | 0.29 eV   |
| Ba2Sb3_ICSD_61089        | 0.26 eV    | 0.25 eV   |
| Ba2Se4Si1_ICSD_49750     | 2.27 eV    | 1.67 eV   |
| Ba2Se5Sn1_ICSD_248033    | 1.17 eV    | 1.12 eV   |
| Ba2Si1Te4_ICSD_49751     | 1.10 eV    | 0.92 eV   |
| Ba3Be1Cl18Zr6_ICSD_33993 | 1.01 eV    | 1.74 eV   |
| Ba3Bi1Cl3O3_ICSD_69618   | 3.98 eV    | 3.72 eV   |
| Ba3Bi1Ir2O9_ICSD_174292  | 0.43 eV    | 0.61 eV   |
| Ba3Bi1N1_ICSD_152055     | 0.67 eV    | 0.63 eV   |
| Ba3Bi1Na1O6_ICSD_72839   | 1.77 eV    | 2.03 eV   |
| Ba3Bi1O9Ru2_ICSD_72448   | 0.88 eV    | 0.87 eV   |
| Ba3Bi2O16P4_ICSD_61061   | 3.82 eV    | 3.43 eV   |
| Ba3Bi2O9Te1_ICSD_90842   | 2.13 eV    | 1.68 eV   |
| Ba3Br2Fe2O5_ICSD_48179   | 2.20 eV    | 1.77 eV   |
| Ba3C1Cl4O3_ICSD_174065   | 4.76 eV    | 4.21 eV   |
| Ba3C1F7O3Sc1_ICSD_75255  | 5.21 eV    | 5.35 eV   |
| Ba3C5F2La2O15_ICSD_72445 | 4.43 eV    | 4.35 eV   |

Supplementary Table 672. Five-fold cross validated predictions for the band gap energy (66/277).

| system                      | calculated | predicted |
|-----------------------------|------------|-----------|
| Ba3Ca1O9Ru2.ICSD.152482     | 0.86 eV    | 0.99 eV   |
| Ba3Ca1O9Ru2.ICSD.71209      | 0.98 eV    | 0.94 eV   |
| Ba3Ca1O9Ru2.ICSD.73183      | 0.99 eV    | 0.97 eV   |
| Ba3Ca1O9Sb2.ICSD.249664     | 3.17 eV    | 2.41 eV   |
| Ba3Ca2N6Si2.ICSD.187336     | 1.57 eV    | 1.69 eV   |
| Ba3Cl2Cu2O4.ICSD.115        | 1.11 eV    | 1.41 eV   |
| Ba3Cl2Fe2O5.ICSD.48178      | 2.22 eV    | 1.72 eV   |
| Ba3Cl2O5W1.ICSD.63518       | 3.60 eV    | 2.96 eV   |
| Ba3Co1Nb2O9.ICSD.150431     | 2.58 eV    | 1.67 eV   |
| Ba3Co1O9Ru2.ICSD.69092      | 0.79 eV    | 0.78 eV   |
| Ba3Co1O9Sb2.ICSD.151442     | 2.33 eV    | 1.70 eV   |
| Ba3Cr1O5.ICSD.73893         | 1.47 eV    | 1.71 eV   |
| Ba3Cr2Mo1O9.ICSD.81071      | 1.12 eV    | 1.25 eV   |
| Ba3Cr2O9W1.ICSD.81072       | 1.75 eV    | 1.65 eV   |
| Ba3Cr2S6.ICSD.97540         | 0.92 eV    | 0.91 eV   |
| Ba3Cu2Er2O10Pt1.ICSD.69569  | 1.30 eV    | 1.34 eV   |
| Ba3Cu2Ho2O10Pt1.ICSD.62391  | 1.31 eV    | 1.30 eV   |
| Ba3Cu2O10Pt1Y2.ICSD.62390   | 1.33 eV    | 1.35 eV   |
| Ba3Dy1O9Ru2.ICSD.401914     | 0.60 eV    | 0.60 eV   |
| Ba3Dy4O9.ICSD.72480         | 3.24 eV    | 3.29 eV   |
| Ba3Er1O9Ru2.ICSD.401915     | 0.57 eV    | 0.66 eV   |
| Ba3Er4O9.ICSD.72481         | 3.28 eV    | 3.49 eV   |
| Ba3F12In2.ICSD.48182        | 4.63 eV    | 4.53 eV   |
| Ba3Fe1S5.ICSD.280           | 0.29 eV    | 1.29 eV   |
| Ba3Fe3Nb1O14Si2.ICSD.162894 | 2.32 eV    | 2.26 eV   |
| Ba3Fe3Se7.ICSD.16310        | 0.40 eV    | 0.82 eV   |
| Ba3Ga2Ge4O14.ICSD.250124    | 2.23 eV    | 2.80 eV   |
| Ba3Ga2N4.ICSD.82736         | 1.52 eV    | 1.38 eV   |
| Ba3Ga2S6.ICSD.201421        | 2.68 eV    | 2.60 eV   |
| Ba3Ga3Nb1O14Si2.ICSD.154215 | 3.55 eV    | 3.37 eV   |
| Ba3Ge1O1.ICSD.50512         | 0.31 eV    | 0.57 eV   |
| Ba3Ho4O9.ICSD.33807         | 3.26 eV    | 3.38 eV   |
| Ba3In1O9Ru2.ICSD.15261      | 0.73 eV    | 0.90 eV   |
| Ba3In2O11Zn5.ICSD.73192     | 2.29 eV    | 1.96 eV   |
| Ba3In2P4.ICSD.402812        | 1.13 eV    | 0.84 eV   |
| Ba3Ir2Na1O9.ICSD.413452     | 0.21 eV    | 0.54 eV   |
| Ba3Ir2O9Sr1.ICSD.245254     | 0.19 eV    | 0.37 eV   |
| Ba3Ir2O9Y1.ICSD.16367       | 0.17 eV    | 0.31 eV   |
| Ba3La1O9Ru2.ICSD.51926      | 0.66 eV    | 0.84 eV   |
| Ba3Lu1O9Ru2.ICSD.51929      | 0.54 eV    | 0.67 eV   |
| Ba3Lu4O9.ICSD.38383         | 3.48 eV    | 3.52 eV   |
| Ba3Mg1O8Si2.ICSD.419862     | 4.70 eV    | 3.88 eV   |
| Ba3Mg1O9Ru2.ICSD.33529      | 0.88 eV    | 0.99 eV   |
| Ba3Mg1O9Sb2.ICSD.33527      | 2.65 eV    | 2.58 eV   |
| Ba3Mn2O8.ICSD.280045        | 1.59 eV    | 1.62 eV   |
| Ba3N1Sb1.ICSD.152054        | 0.71 eV    | 0.62 eV   |
| Ba3N2O12Si6.ICSD.421322     | 4.62 eV    | 4.47 eV   |
| Ba3N2O1Zn1.ICSD.55536       | 0.52 eV    | 1.08 eV   |
| Ba3N4O9Si6.ICSD.415918      | 4.37 eV    | 4.02 eV   |
| Ba3N8O6P6.ICSD.710077       | 4.54 eV    | 4.31 eV   |

Supplementary Table 673. Five-fold cross validated predictions for the band gap energy (67/277).

| system                      | calculated | predicted |
|-----------------------------|------------|-----------|
| Ba3Na1Nb1O6.ICSD.72330      | 3.23 eV    | 3.29 eV   |
| Ba3Na1O6Ru1.ICSD.405133     | 1.45 eV    | 1.45 eV   |
| Ba3Na1O6Ta1.ICSD.72331      | 3.47 eV    | 3.49 eV   |
| Ba3Nb2O18P4.ICSD.90878      | 3.46 eV    | 3.15 eV   |
| Ba3Nb2O8.ICSD.95193         | 4.46 eV    | 3.25 eV   |
| Ba3Nb2O9Sr1.ICSD.24390      | 3.48 eV    | 3.53 eV   |
| Ba3Nb2O9Sr1.ICSD.37161      | 3.69 eV    | 3.44 eV   |
| Ba3Nb2O9Zn1.ICSD.157044     | 2.95 eV    | 2.99 eV   |
| Ba3Nb6O26Si4.ICSD.16029     | 2.57 eV    | 3.10 eV   |
| Ba3Ni1O4.ICSD.30662         | 2.05 eV    | 1.75 eV   |
| Ba3Ni1O9Ru2.ICSD.50831      | 1.00 eV    | 0.98 eV   |
| Ba3Ni1O9Sb2.ICSD.1177       | 0.72 eV    | 1.56 eV   |
| Ba3Ni1O9Ta2.ICSD.240281     | 3.50 eV    | 2.71 eV   |
| Ba3O11Te4.ICSD.37069        | 3.23 eV    | 3.01 eV   |
| Ba3O13P4.ICSD.280908        | 5.11 eV    | 4.74 eV   |
| Ba3O1Sb2.ICSD.280592        | 0.33 eV    | 0.48 eV   |
| Ba3O1Sb4.ICSD.415032        | 0.34 eV    | 0.70 eV   |
| Ba3O20Si4Te1Zn6.ICSD.416231 | 3.24 eV    | 3.08 eV   |
| Ba3O23Si4Ta6.ICSD.18316     | 0.17 eV    | 2.59 eV   |
| Ba3O26Si4Ta6.ICSD.18317     | 3.26 eV    | 2.91 eV   |
| Ba3O3S4V2.ICSD.279607       | 0.90 eV    | 1.28 eV   |
| Ba3O4P2Se4.ICSD.414638      | 1.31 eV    | 1.88 eV   |
| Ba3O5Si1.ICSD.1449          | 3.53 eV    | 3.24 eV   |
| Ba3O6Sb2.ICSD.413764        | 2.93 eV    | 2.52 eV   |
| Ba3O6W1.ICSD.76437          | 2.72 eV    | 3.03 eV   |
| Ba3O8P2.ICSD.69450          | 5.15 eV    | 4.60 eV   |
| Ba3O8V2.ICSD.78169          | 3.72 eV    | 3.16 eV   |
| Ba3O9Ru2Sr1.ICSD.48102      | 1.23 eV    | 0.86 eV   |
| Ba3O9Ru2Tb1.ICSD.95165      | 0.60 eV    | 0.58 eV   |
| Ba3O9Ru2Y1.ICSD.51924       | 0.60 eV    | 0.69 eV   |
| Ba3O9Ru2Zn1.ICSD.69090      | 0.86 eV    | 0.97 eV   |
| Ba3O9Sb2Sr1.ICSD.249663     | 3.13 eV    | 2.74 eV   |
| Ba3O9Sr1Ta2.ICSD.24391      | 3.92 eV    | 3.81 eV   |
| Ba3O9Sr1Ta2.ICSD.27496      | 3.45 eV    | 3.68 eV   |
| Ba3O9Sr1Ta2.ICSD.37162      | 4.15 eV    | 3.97 eV   |
| Ba3O9Te2.ICSD.100797        | 2.36 eV    | 2.62 eV   |
| Ba3O9Y4.ICSD.87118          | 3.30 eV    | 3.55 eV   |
| Ba3P2S8.ICSD.417422         | 1.98 eV    | 2.07 eV   |
| Ba3P4Sn2.ICSD.80132         | 0.81 eV    | 0.83 eV   |
| Ba3P4.ICSD.38322            | 0.48 eV    | 0.65 eV   |
| Ba3P6Si4.ICSD.29261         | 0.40 eV    | 0.94 eV   |
| Ba3S5Si1.ICSD.26377         | 2.81 eV    | 2.57 eV   |
| Ba3S5Ti1.ICSD.203087        | 1.38 eV    | 1.51 eV   |
| Ba3S7Sn2.ICSD.166524        | 1.95 eV    | 1.84 eV   |
| Ba3S7Zr2.ICSD.59271         | 0.82 eV    | 1.02 eV   |
| Ba3S8Ta2.ICSD.202878        | 0.81 eV    | 1.17 eV   |
| Ba4Br2Si3.ICSD.411640       | 0.33 eV    | 1.09 eV   |
| Ba4Br6O1.ICSD.391435        | 4.16 eV    | 4.19 eV   |
| Ba4C2Cu1Li1O10.ICSD.401122  | 0.87 eV    | 1.33 eV   |
| Ba4C2Cu1Na1O10.ICSD.66776   | 1.00 eV    | 1.28 eV   |

Supplementary Table 674. Five-fold cross validated predictions for the band gap energy (68/277).

| system                         | calculated | predicted |
|--------------------------------|------------|-----------|
| Ba4Cd3S10Tb2.ICSD_411167       | 1.92 eV    | 1.35 eV   |
| Ba4Ce1Mn3O12.ICSD_99661        | 1.87 eV    | 1.57 eV   |
| Ba4Cl12Co2.ICSD_280274         | 3.27 eV    | 3.09 eV   |
| Ba4Cl2N4W1.ICSD_50003          | 2.22 eV    | 2.16 eV   |
| Ba4Cl6O1.ICSD_16026            | 4.38 eV    | 4.39 eV   |
| Ba4Er1O12Ru3.ICSD_174186       | 0.29 eV    | 0.41 eV   |
| Ba4F24H1P3.ICSD_419143         | 6.02 eV    | 6.50 eV   |
| Ba4Ga2S7.ICSD_201420           | 2.66 eV    | 2.44 eV   |
| Ba4Ge1P4.ICSD_32560            | 1.01 eV    | 0.94 eV   |
| Ba4H0.666Nb2O9.333.ICSD_165531 | 3.45 eV    | 3.16 eV   |
| Ba4Hf3S10.ICSD_602359          | 0.19 eV    | 0.41 eV   |
| Ba4Ho1O12Ru3.ICSD_160868       | 0.28 eV    | 0.42 eV   |
| Ba4I6O1.ICSD_280584            | 3.98 eV    | 3.42 eV   |
| Ba4In2S8.ICSD_261680           | 1.95 eV    | 1.66 eV   |
| Ba4K1O1Sb3.ICSD_410747         | 1.02 eV    | 0.84 eV   |
| Ba4Li1Nb3O12.ICSD_19009        | 2.79 eV    | 2.96 eV   |
| Ba4Li1O12Ta3.ICSD_19010        | 3.21 eV    | 3.12 eV   |
| Ba4Mg1N6Si2.ICSD_187335        | 1.14 eV    | 1.53 eV   |
| Ba4Mn3O10.ICSD_51881           | 1.04 eV    | 1.35 eV   |
| Ba4Mn3O12Pr1.ICSD_99662        | 1.52 eV    | 1.68 eV   |
| Ba4Na1O12Sb3.ICSD_160173       | 1.52 eV    | 2.20 eV   |
| Ba4O16Si6.ICSD_100310          | 4.52 eV    | 4.25 eV   |
| Ba4O1Rb1Sb3.ICSD_415036        | 0.94 eV    | 0.84 eV   |
| Ba4O1Sb2.ICSD_402284           | 0.64 eV    | 0.53 eV   |
| Ba4O6Pt1.ICSD_65706            | 2.00 eV    | 2.20 eV   |
| Ba4O9Ta2.ICSD_166900           | 4.09 eV    | 3.77 eV   |
| Ba4P3.ICSD_73206               | 0.74 eV    | 0.84 eV   |
| Ba4P4Si1.ICSD_32559            | 1.09 eV    | 0.91 eV   |
| Ba4P4Ti1.ICSD_380114           | 1.14 eV    | 1.14 eV   |
| Ba4S10Zr3.ICSD_72656           | 0.47 eV    | 0.84 eV   |
| Ba4Sb4Se11.ICSD_31500          | 1.10 eV    | 0.94 eV   |
| Ba5Br1O12P3.ICSD_409482        | 4.97 eV    | 4.59 eV   |
| Ba5Br2O9Ru2.ICSD_245668        | 1.42 eV    | 1.23 eV   |
| Ba5Br6O4Si1.ICSD_73365         | 4.26 eV    | 3.95 eV   |
| Ba5Cd2O2Sb4.ICSD_423458        | 0.10 eV    | 0.49 eV   |
| Ba5Cl1Mn3O12.ICSD_61356        | 1.73 eV    | 2.09 eV   |
| Ba5Cl1O12P3.ICSD_8191          | 5.06 eV    | 4.72 eV   |
| Ba5Cl1O12V3.ICSD_170769        | 3.95 eV    | 2.83 eV   |
| Ba5Cl1O15Os3.ICSD_80447        | 1.20 eV    | 1.65 eV   |
| Ba5Cl1O15Re3.ICSD_73928        | 2.64 eV    | 1.69 eV   |
| Ba5Cl2O9Ta2.ICSD_240872        | 3.60 eV    | 3.27 eV   |
| Ba5Co5O14.ICSD_153698          | 1.27 eV    | 1.27 eV   |
| Ba5Cr1N5.ICSD_82360            | 0.17 eV    | 0.79 eV   |
| Ba5Er8O21Zn4.ICSD_400436       | 3.54 eV    | 3.33 eV   |
| Ba5Fe4S11.ICSD_16372           | 0.49 eV    | 0.83 eV   |
| Ba5Gd8O21Zn4.ICSD_94223        | 3.25 eV    | 3.32 eV   |
| Ba5Hf4S13.ICSD_71936           | 0.25 eV    | 0.45 eV   |
| Ba5Ho8O21Zn4.ICSD_73186        | 3.51 eV    | 3.33 eV   |
| Ba5Nb4O15.ICSD_157477          | 2.79 eV    | 2.80 eV   |
| Ba5O10Ru2.ICSD_75386           | 0.77 eV    | 0.92 eV   |

Supplementary Table 675. Five-fold cross validated predictions for the band gap energy (69/277).

| system                      | calculated | predicted |
|-----------------------------|------------|-----------|
| Ba5O15Ta4.ICSD_16028        | 3.10 eV    | 3.19 eV   |
| Ba5P4.ICSD_413273           | 0.93 eV    | 0.69 eV   |
| Ba5Sb4.ICSD_280022          | 0.25 eV    | 0.30 eV   |
| Ba5Sb4.ICSD_52693           | 0.27 eV    | 0.30 eV   |
| Ba6C60.ICSD_70062           | 0.17 eV    | 1.02 eV   |
| Ba6Cl2Eu1F12.ICSD_411225    | 3.13 eV    | 4.22 eV   |
| Ba6Cl2O12Pt1Ru2.ICSD_72280  | 1.50 eV    | 1.22 eV   |
| Ba6Cl2O12Ru3.ICSD_99681     | 0.92 eV    | 1.13 eV   |
| Ba6F26Mg7.ICSD_50217        | 6.81 eV    | 6.72 eV   |
| Ba6Ga2P6.ICSD_402177        | 0.60 eV    | 0.83 eV   |
| Ba6Hf5S16.ICSD_71935        | 0.30 eV    | 0.37 eV   |
| Ba6Mn5O16.ICSD_97017        | 1.30 eV    | 1.07 eV   |
| Ba6Na2Nb2O17P2.ICSD_249742  | 3.26 eV    | 3.32 eV   |
| Ba6Nb8O30Ti2.ICSD_36081     | 2.17 eV    | 2.74 eV   |
| Ba6O17Ti4Y2.ICSD_96630      | 3.03 eV    | 2.99 eV   |
| Ba6O18W4.ICSD_9725          | 3.45 eV    | 3.14 eV   |
| Ba6P6Sn2.ICSD_35342         | 0.77 eV    | 0.72 eV   |
| Ba7Cl2F12.ICSD_87084        | 6.06 eV    | 5.16 eV   |
| Ba7Cu1F34Fe6.ICSD_203173    | 2.51 eV    | 2.59 eV   |
| Ba7Ir6O19.ICSD_74686        | 0.27 eV    | 0.29 eV   |
| Ba8Si6Sn1.ICSD_169999       | 0.27 eV    | 0.54 eV   |
| Ba9C1N10Nb2O1.ICSD_412664   | 1.80 eV    | 1.72 eV   |
| Ba9N12Nb2.ICSD_402743       | 1.27 eV    | 1.77 eV   |
| Ba9O24Sc2Si6.ICSD_75175     | 4.51 eV    | 3.92 eV   |
| Be17Ca12O29.ICSD_14359      | 3.66 eV    | 4.33 eV   |
| Be1Bi1La3S7.ICSD_616183     | 1.73 eV    | 1.53 eV   |
| Be1Br2.ICSD_92584           | 5.19 eV    | 4.56 eV   |
| Be1C1N2.ICSD_181041         | 3.85 eV    | 4.65 eV   |
| Be1C1N2.ICSD_181042         | 5.48 eV    | 4.96 eV   |
| Be1C4Cl2H16O4S2.ICSD_249588 | 4.47 eV    | 4.54 eV   |
| Be1C4K2O8.ICSD_1446         | 3.39 eV    | 4.09 eV   |
| Be1Ca1F1Na1O6Si2.ICSD_15314 | 5.29 eV    | 5.19 eV   |
| Be1Ca2O7Si2.ICSD_31234      | 4.99 eV    | 4.82 eV   |
| Be1Cl2.ICSD_173559          | 6.65 eV    | 6.35 eV   |
| Be1Cl2.ICSD_173560          | 6.35 eV    | 6.40 eV   |
| Be1Cl2.ICSD_173561          | 6.59 eV    | 6.52 eV   |
| Be1Cl2.ICSD_31696           | 6.28 eV    | 5.68 eV   |
| Be1Cl2.ICSD_78774           | 6.52 eV    | 6.46 eV   |
| Be1Cl4Cs2.ICSD_49622        | 5.54 eV    | 5.23 eV   |
| Be1Cr1Dy3S7.ICSD_616230     | 0.88 eV    | 0.99 eV   |
| Be1Cr1Er3S7.ICSD_616231     | 0.86 eV    | 1.10 eV   |
| Be1Cr1La3S7.ICSD_616233     | 0.97 eV    | 0.73 eV   |
| Be1Cr1Nd3S7.ICSD_616236     | 0.95 eV    | 0.93 eV   |
| Be1Cr1S7Y3.ICSD_616240      | 0.90 eV    | 1.06 eV   |
| Be1Cs1F3.ICSD_290358        | 5.35 eV    | 6.14 eV   |
| Be1Cs1F3.ICSD_9870          | 6.65 eV    | 6.80 eV   |
| Be1Cs1F4Li1.ICSD_42463      | 6.89 eV    | 6.98 eV   |
| Be1Cs1F4Li1.ICSD_9434       | 0.13 eV    | 0.64 eV   |
| Be1Cs1H3.ICSD_173446        | 3.19 eV    | 3.61 eV   |
| Be1Cs2F4.ICSD_153084        | 6.87 eV    | 6.61 eV   |

Supplementary Table 676. Five-fold cross validated predictions for the band gap energy (70/277).

| system                  | calculated | predicted |
|-------------------------|------------|-----------|
| Be1Cs2F4_ICSD_23152     | 6.71 eV    | 6.68 eV   |
| Be1F2_ICSD_173557       | 8.04 eV    | 7.61 eV   |
| Be1F2_ICSD_173558       | 8.08 eV    | 7.57 eV   |
| Be1F2_ICSD_261194       | 8.34 eV    | 7.71 eV   |
| Be1F2_ICSD_9481         | 8.09 eV    | 7.62 eV   |
| Be1F3H4N1_ICSD_61060    | 6.48 eV    | 6.59 eV   |
| Be1F4H4Li1N1_ICSD_9433  | 6.56 eV    | 6.49 eV   |
| Be1F4H5Li1N2_ICSD_1903  | 5.62 eV    | 6.28 eV   |
| Be1F4H8N2_ICSD_200916   | 6.62 eV    | 6.14 eV   |
| Be1F4K1Li1_ICSD_2773    | 6.85 eV    | 7.05 eV   |
| Be1F4K2_ICSD_153081     | 6.87 eV    | 6.84 eV   |
| Be1F4K2_ICSD_50337      | 6.84 eV    | 6.83 eV   |
| Be1F4Li2_ICSD_14360     | 7.59 eV    | 7.53 eV   |
| Be1F4Na2_ICSD_20366     | 6.39 eV    | 6.56 eV   |
| Be1F4Na2_ICSD_28105     | 6.75 eV    | 6.62 eV   |
| Be1F4Pb1_ICSD_24568     | 5.19 eV    | 4.46 eV   |
| Be1F4Rb2_ICSD_153082    | 6.65 eV    | 6.63 eV   |
| Be1F4Rb2_ICSD_61800     | 6.65 eV    | 6.75 eV   |
| Be1F4Ti2_ICSD_171183    | 4.44 eV    | 4.40 eV   |
| Be1F4Yb1_ICSD_411132    | 1.98 eV    | 1.99 eV   |
| Be1F5K3_ICSD_14114      | 6.21 eV    | 6.32 eV   |
| Be1F6Ho1K1_ICSD_2143    | 7.39 eV    | 5.15 eV   |
| Be1Ga1La3S7_ICSD_616274 | 1.13 eV    | 1.71 eV   |
| Be1Ge1Na2O4_ICSD_80357  | 3.66 eV    | 3.58 eV   |
| Be1H2O2_ICSD_50445      | 5.72 eV    | 5.77 eV   |
| Be1H2O4Se1_ICSD_410094  | 4.79 eV    | 4.35 eV   |
| Be1H2_ICSD_161367       | 5.42 eV    | 4.83 eV   |
| Be1H3K1_ICSD_173445     | 3.21 eV    | 3.61 eV   |
| Be1H3Li1_ICSD_162770    | 4.81 eV    | 4.37 eV   |
| Be1H3Li1_ICSD_162772    | 4.41 eV    | 4.76 eV   |
| Be1H3Li1_ICSD_162773    | 4.40 eV    | 4.72 eV   |
| Be1H3Li1_ICSD_162774    | 4.56 eV    | 4.44 eV   |
| Be1H3Li1_ICSD_162775    | 4.89 eV    | 4.38 eV   |
| Be1H3Li1_ICSD_173447    | 2.39 eV    | 3.61 eV   |
| Be1H3Na1_ICSD_158250    | 0.91 eV    | 2.47 eV   |
| Be1H3Rb1_ICSD_173449    | 3.29 eV    | 3.20 eV   |
| Be1H4N1O4P1_ICSD_85445  | 5.24 eV    | 5.41 eV   |
| Be1H4Na2_ICSD_159452    | 4.58 eV    | 3.84 eV   |
| Be1H4O4Sr1_ICSD_180022  | 4.16 eV    | 4.31 eV   |
| Be1H8I2O10_ICSD_83330   | 4.01 eV    | 3.65 eV   |
| Be1H8O8S1_ICSD_74572    | 5.46 eV    | 5.18 eV   |
| Be1H8O8Se1_ICSD_150083  | 3.99 eV    | 4.27 eV   |
| Be1I2_ICSD_92585        | 4.12 eV    | 3.13 eV   |
| Be1In1La3S7_ICSD_616297 | 1.66 eV    | 1.48 eV   |
| Be1K1O4P1_ICSD_4255     | 5.24 eV    | 5.26 eV   |
| Be1K1O9P3_ICSD_40866    | 5.54 eV    | 5.40 eV   |
| Be1K4P2_ICSD_300110     | 1.14 eV    | 1.09 eV   |
| Be1La3S7Sb1_ICSD_616308 | 1.50 eV    | 1.43 eV   |
| Be1La3S7Sc1_ICSD_616309 | 1.32 eV    | 1.49 eV   |
| Be1La3S7Ti1_ICSD_616310 | 1.25 eV    | 1.24 eV   |

Supplementary Table 677. Five-fold cross validated predictions for the band gap energy (71/277).

| system                       | calculated | predicted |
|------------------------------|------------|-----------|
| Be1La3S7V1_ICSD_616311       | 0.45 eV    | 0.95 eV   |
| Be1Li1N1_ICSD_402341         | 2.69 eV    | 3.01 eV   |
| Be1Li1P1_ICSD_616316         | 1.16 eV    | 1.07 eV   |
| Be1Li1Sb1_ICSD_616318        | 0.85 eV    | 0.95 eV   |
| Be1Li2O4Si1_ICSD_2319        | 5.58 eV    | 5.39 eV   |
| Be1N2Si1_ICSD_25704          | 5.14 eV    | 4.34 eV   |
| Be1N2Si1_ICSD_44112          | 3.56 eV    | 4.08 eV   |
| Be1N4P2_ICSD_421385          | 4.04 eV    | 3.95 eV   |
| Be1Na1Sb1_ICSD_100092        | 0.89 eV    | 0.89 eV   |
| Be1Na2O2_ICSD_67154          | 2.84 eV    | 2.95 eV   |
| Be1O1_ICSD_163467            | 6.85 eV    | 6.44 eV   |
| Be1O1_ICSD_163826            | 8.17 eV    | 6.71 eV   |
| Be1O1_ICSD_18147             | 7.09 eV    | 6.39 eV   |
| Be1O1_ICSD_34237             | 7.45 eV    | 6.86 eV   |
| Be1O4S1_ICSD_44801           | 6.94 eV    | 5.44 eV   |
| Be1O6P2_ICSD_100404          | 5.83 eV    | 5.72 eV   |
| Be1P2_ICSD_2262              | 0.83 eV    | 1.19 eV   |
| Be1S1_ICSD_186889            | 3.14 eV    | 1.58 eV   |
| Be1S1_ICSD_52719             | 0.99 eV    | 2.51 eV   |
| Be1Se1_ICSD_52720            | 0.11 eV    | 1.85 eV   |
| Be1Se1_ICSD_616419           | 2.67 eV    | 0.87 eV   |
| Be1Te1_ICSD_290008           | 2.02 eV    | 0.96 eV   |
| Be2C1_ICSD_183009            | 1.17 eV    | 0.90 eV   |
| Be2Ca1P2_ICSD_616191         | 0.73 eV    | 0.77 eV   |
| Be2Ca3H10O20P4_ICSD_40671    | 5.33 eV    | 5.36 eV   |
| Be2Cs1F5_ICSD_2801           | 7.16 eV    | 6.98 eV   |
| Be2Dy2Ge1O7_ICSD_39121       | 4.42 eV    | 4.42 eV   |
| Be2Er2Ge1O7_ICSD_39123       | 4.38 eV    | 4.46 eV   |
| Be2F5Rb1_ICSD_28541          | 6.85 eV    | 7.07 eV   |
| Be2F7H4Li2N1_ICSD_240273     | 6.93 eV    | 6.87 eV   |
| Be2F7Li1Na2_ICSD_9430        | 6.92 eV    | 6.92 eV   |
| Be2F7Li2Rb1_ICSD_72          | 7.19 eV    | 7.20 eV   |
| Be2F8K2Pb1_ICSD_9902         | 5.55 eV    | 4.62 eV   |
| Be2F8K2Sr1_ICSD_109005       | 7.17 eV    | 7.12 eV   |
| Be2Gd2Ge1O7_ICSD_39120       | 4.28 eV    | 4.17 eV   |
| Be2Ge1La2O7_ICSD_39117       | 4.00 eV    | 3.90 eV   |
| Be2Ge1O7Pr2_ICSD_39118       | 3.85 eV    | 3.53 eV   |
| Be2Ge1O7Y2_ICSD_39122        | 4.49 eV    | 4.36 eV   |
| Be2Ho2O7Si1_ICSD_73521       | 5.09 eV    | 4.64 eV   |
| Be2K2Na4O5_ICSD_33849        | 2.46 eV    | 2.37 eV   |
| Be2K4O4_ICSD_23633           | 1.14 eV    | 2.24 eV   |
| Be2La2O5_ICSD_36063          | 4.04 eV    | 3.83 eV   |
| Be2Mg1N2_ICSD_413358         | 4.06 eV    | 3.01 eV   |
| Be2Mg1P2_ICSD_616328         | 0.66 eV    | 0.77 eV   |
| Be2O10P3Rb1_ICSD_72985       | 5.62 eV    | 5.24 eV   |
| Be2O4Si1_ICSD_202275         | 5.82 eV    | 5.88 eV   |
| Be2O7Si1Y2_ICSD_23233        | 5.16 eV    | 4.63 eV   |
| Be3Ca3F2Li2O12Si3_ICSD_39389 | 5.74 eV    | 5.12 eV   |
| Be3Cd2F12Rb2_ICSD_15155      | 5.39 eV    | 4.80 eV   |
| Be3Cl1Li4O12P3_ICSD_74525    | 6.22 eV    | 6.05 eV   |

Supplementary Table 678. Five-fold cross validated predictions for the band gap energy (72/277).

| system                     | calculated | predicted |
|----------------------------|------------|-----------|
| Be3F12K2Mg2_ICSD_15152     | 7.01 eV    | 7.11 eV   |
| Be3F12K2Mn2_ICSD_83658     | 4.51 eV    | 3.78 eV   |
| Be3F12K2Zn2_ICSD_24962     | 6.56 eV    | 6.61 eV   |
| Be3F9K1Zn1_ICSD_18022      | 6.95 eV    | 6.85 eV   |
| Be3F9Rb1Zn1_ICSD_23133     | 6.90 eV    | 6.92 eV   |
| Be3H4O10P2_ICSD_88664      | 5.85 eV    | 5.61 eV   |
| Be3K4O5_ICSD_33808         | 3.21 eV    | 2.50 eV   |
| Be3Mn4O12S1Si3_ICSD_2709   | 3.13 eV    | 2.96 eV   |
| Be3N2_ICSD_185490          | 2.76 eV    | 3.76 eV   |
| Be3N2_ICSD_185491          | 4.27 eV    | 3.53 eV   |
| Be3N2_ICSD_25656           | 3.33 eV    | 3.57 eV   |
| Be3N2_ICSD_412667          | 3.32 eV    | 3.34 eV   |
| Be3O4Sr1_ICSD_26179        | 4.13 eV    | 4.34 eV   |
| Be3P2_ICSD_187677          | 0.22 eV    | 0.97 eV   |
| Be3P2_ICSD_616384          | 0.89 eV    | 0.84 eV   |
| Be4C6K6O19_ICSD_412642     | 4.78 eV    | 4.32 eV   |
| Be4Ca2N4_ICSD_413357       | 2.40 eV    | 2.68 eV   |
| Be4H2O9Si2_ICSD_202360     | 5.76 eV    | 5.39 eV   |
| Be4N4Sr2_ICSD_413356       | 1.87 eV    | 2.36 eV   |
| Be4Na10O17Si4_ICSD_68750   | 3.98 eV    | 3.90 eV   |
| Be4Na1O7Sb1_ICSD_27599     | 3.39 eV    | 3.90 eV   |
| Be4O7Te1_ICSD_1322         | 1.29 eV    | 3.54 eV   |
| Be6Br2Li8O24P6_ICSD_80472  | 5.93 eV    | 5.20 eV   |
| Be6Cd8O24S2Si6_ICSD_81485  | 2.98 eV    | 3.08 eV   |
| Be6Cd8O24Se2Si6_ICSD_81486 | 2.93 eV    | 3.06 eV   |
| Be6Cd8O24Si6Te2_ICSD_81487 | 2.95 eV    | 2.99 eV   |
| Be6Ge6Mn8O24S2_ICSD_83841  | 2.40 eV    | 2.28 eV   |
| Be6Ge6Mn8O24Se2_ICSD_83842 | 2.25 eV    | 2.24 eV   |
| Be6Mn8O24Se2Si6_ICSD_83839 | 2.96 eV    | 2.97 eV   |
| Be6Mn8O24Si6Te2_ICSD_83840 | 2.94 eV    | 2.83 eV   |
| Be6O24S2Si6Zn8_ICSD_201641 | 4.51 eV    | 4.22 eV   |
| Bi12Cl12Pt1_ICSD_415739    | 0.87 eV    | 1.18 eV   |
| Bi12O20Si1_ICSD_422389     | 2.41 eV    | 2.39 eV   |
| Bi14Br16Pd1_ICSD_412895    | 1.18 eV    | 1.55 eV   |
| Bi1Br1Cd1S2_ICSD_171725    | 1.80 eV    | 1.63 eV   |
| Bi1Br1Cd1Se2_ICSD_171726   | 1.44 eV    | 1.31 eV   |
| Bi1Br1Cu3O8Se2_ICSD_280759 | 1.12 eV    | 1.03 eV   |
| Bi1Br1Mn1S2_ICSD_415307    | 1.55 eV    | 1.38 eV   |
| Bi1Br1O1_ICSD_61225        | 2.31 eV    | 1.92 eV   |
| Bi1Br1O2Sr1_ICSD_97509     | 3.16 eV    | 2.93 eV   |
| Bi1Br1_ICSD_1560           | 0.68 eV    | 1.26 eV   |
| Bi1Br3_ICSD_100293         | 2.62 eV    | 2.29 eV   |
| Bi1Br3_ICSD_100294         | 2.86 eV    | 2.20 eV   |
| Bi1Br7Hg6Sb4_ICSD_411218   | 1.02 eV    | 1.10 eV   |
| Bi1C1Ca1F1O4_ICSD_87759    | 1.07 eV    | 2.39 eV   |
| Bi1C3H6N3S6_ICSD_422349    | 2.49 eV    | 2.59 eV   |
| Bi1C4N4Rb1S4_ICSD_164      | 2.47 eV    | 2.77 eV   |
| Bi1C5H5K2O10_ICSD_109956   | 4.12 eV    | 3.65 eV   |
| Bi1Ca1Cl1O2_ICSD_84635     | 3.63 eV    | 2.93 eV   |
| Bi1Ca1Li1_ICSD_616539      | 0.58 eV    | 0.50 eV   |

Supplementary Table 679. Five-fold cross validated predictions for the band gap energy (73/277).

| system                    | calculated | predicted |
|---------------------------|------------|-----------|
| Bi1Ca1O5V1_ICSD_73184     | 3.23 eV    | 2.99 eV   |
| Bi1Ca2O6V1_ICSD_50939     | 3.02 eV    | 2.87 eV   |
| Bi1Ca2_ICSD_42136         | 0.10 eV    | 0.26 eV   |
| Bi1Ca3N1_ICSD_106320      | 0.38 eV    | 0.58 eV   |
| Bi1Cd1Cl1O2_ICSD_280770   | 2.88 eV    | 2.35 eV   |
| Bi1Cd1Cl1S2_ICSD_171724   | 1.98 eV    | 1.77 eV   |
| Bi1Cd1I1Se2_ICSD_171727   | 1.32 eV    | 1.27 eV   |
| Bi1Ce1O1S2_ICSD_80        | 0.55 eV    | 1.18 eV   |
| Bi1Ce1Pd1_ICSD_616563     | 0.10 eV    | 0.10 eV   |
| Bi1Cl1Cu3O8Se2_ICSD_54190 | 1.28 eV    | 1.16 eV   |
| Bi1Cl1F8_ICSD_39555       | 2.22 eV    | 2.71 eV   |
| Bi1Cl1Mn1S2_ICSD_172156   | 1.70 eV    | 1.52 eV   |
| Bi1Cl1O1_ICSD_24608       | 2.57 eV    | 2.23 eV   |
| Bi1Cl1O2Sr1_ICSD_84636    | 3.33 eV    | 3.19 eV   |
| Bi1Cl1O3Se1_ICSD_411169   | 3.56 eV    | 3.49 eV   |
| Bi1Cl1O3Se1_ICSD_98000    | 3.57 eV    | 3.26 eV   |
| Bi1Cl1S1_ICSD_100173      | 1.95 eV    | 1.56 eV   |
| Bi1Cl1Te1_ICSD_79362      | 1.34 eV    | 1.09 eV   |
| Bi1Cl2Cu1S1_ICSD_413289   | 0.87 eV    | 1.17 eV   |
| Bi1Cl2K1O4S1_ICSD_155203  | 4.19 eV    | 3.51 eV   |
| Bi1Cl3O3Sr3_ICSD_80637    | 4.06 eV    | 3.68 eV   |
| Bi1Cl3_ICSD_41179         | 3.55 eV    | 2.56 eV   |
| Bi1Cl4N3S4_ICSD_9460      | 2.03 eV    | 1.99 eV   |
| Bi1Cl6Cs1K2_ICSD_201983   | 3.92 eV    | 3.32 eV   |
| Bi1Cl6Cs2Na1_ICSD_59195   | 3.71 eV    | 3.72 eV   |
| Bi1Cl6Ti3_ICSD_421317     | 2.66 eV    | 2.65 eV   |
| Bi1Cl8F4H3K6_ICSD_39524   | 4.18 eV    | 3.63 eV   |
| Bi1Co1O3_ICSD_157833      | 0.68 eV    | 1.17 eV   |
| Bi1Co1Zr1_ICSD_107120     | 0.87 eV    | 0.57 eV   |
| Bi1Cr1O3_ICSD_160454      | 1.55 eV    | 1.48 eV   |
| Bi1Cr1O3_ICSD_160456      | 1.31 eV    | 1.40 eV   |
| Bi1Cr2O8Rb1_ICSD_201624   | 2.42 eV    | 2.38 eV   |
| Bi1Cs1F6_ICSD_15122       | 2.91 eV    | 3.19 eV   |
| Bi1Cs1Ge1S4_ICSD_281168   | 2.02 eV    | 2.00 eV   |
| Bi1Cs1O2_ICSD_406564      | 2.34 eV    | 1.99 eV   |
| Bi1Cs1S2_ICSD_72975       | 1.68 eV    | 1.67 eV   |
| Bi1Cs1S4Si1_ICSD_281169   | 2.50 eV    | 2.31 eV   |
| Bi1Cs2F6K1_ICSD_9383      | 4.93 eV    | 4.75 eV   |
| Bi1Cs2F6Na1_ICSD_9382     | 5.02 eV    | 4.83 eV   |
| Bi1Cs2F6Rb1_ICSD_9384     | 4.76 eV    | 4.35 eV   |
| Bi1Cs2F6Th1_ICSD_9385     | 3.09 eV    | 3.27 eV   |
| Bi1Cs3O3_ICSD_406563      | 3.06 eV    | 2.67 eV   |
| Bi1Cs3Se3_ICSD_85410      | 2.09 eV    | 1.82 eV   |
| Bi1Cs3_ICSD_58769         | 0.22 eV    | 0.31 eV   |
| Bi1Cs3_ICSD_659568        | 0.21 eV    | 0.33 eV   |
| Bi1Cu1O1Se1_ICSD_74475    | 0.52 eV    | 0.62 eV   |
| Bi1Cu1O8W2_ICSD_67569     | 1.43 eV    | 1.68 eV   |
| Bi1Cu1P2Se6_ICSD_170643   | 0.94 eV    | 1.07 eV   |
| Bi1Cu1Pb1S3_ICSD_9120     | 0.83 eV    | 0.83 eV   |
| Bi1Cu1Pt1S3_ICSD_180450   | 0.76 eV    | 0.99 eV   |

Supplementary Table 680. Five-fold cross validated predictions for the band gap energy (74/277).

| system                    | calculated | predicted |
|---------------------------|------------|-----------|
| Bi1Cu1S2_ICSD_38779       | 0.72 eV    | 0.84 eV   |
| Bi1Cu2O6P1_ICSD_75387     | 0.71 eV    | 1.09 eV   |
| Bi1Cu3I1O8Se2_ICSD_54191  | 0.81 eV    | 1.09 eV   |
| Bi1Cu3S3_ICSD_616615      | 1.01 eV    | 0.97 eV   |
| Bi1Dy1Ni1_ICSD_58779      | 0.11 eV    | 0.12 eV   |
| Bi1Er1Ge1O5_ICSD_96409    | 3.32 eV    | 2.66 eV   |
| Bi1F1O1_ICSD_24096        | 3.13 eV    | 2.52 eV   |
| Bi1F3_ICSD_1269           | 4.69 eV    | 3.73 eV   |
| Bi1F3_ICSD_25567          | 3.96 eV    | 3.38 eV   |
| Bi1F3_ICSD_655136         | 3.95 eV    | 3.24 eV   |
| Bi1F4K1_ICSD_63166        | 3.26 eV    | 3.55 eV   |
| Bi1F4Li1_ICSD_65404       | 4.84 eV    | 3.16 eV   |
| Bi1F4Rb1_ICSD_63167       | 2.90 eV    | 3.13 eV   |
| Bi1F5K2_ICSD_418777       | 4.77 eV    | 4.26 eV   |
| Bi1F5_ICSD_25023          | 1.97 eV    | 2.69 eV   |
| Bi1F6K1Rb2_ICSD_9387      | 4.77 eV    | 4.72 eV   |
| Bi1F6K1_ICSD_25024        | 2.91 eV    | 3.32 eV   |
| Bi1F6K1_ICSD_25025        | 2.85 eV    | 3.33 eV   |
| Bi1F6Li1_ICSD_15119       | 2.75 eV    | 3.37 eV   |
| Bi1F6Na1Rb2_ICSD_9386     | 4.92 eV    | 4.59 eV   |
| Bi1F6Na1_ICSD_15120       | 2.88 eV    | 3.22 eV   |
| Bi1F6Rb1_ICSD_15121       | 2.78 eV    | 2.92 eV   |
| Bi1F7Kr1_ICSD_279626      | 2.45 eV    | 2.45 eV   |
| Bi1Fe1O3_ICSD_162264      | 1.66 eV    | 1.71 eV   |
| Bi1Fe1O3_ICSD_168320      | 1.47 eV    | 1.34 eV   |
| Bi1Fe1O3_ICSD_168321      | 1.34 eV    | 1.27 eV   |
| Bi1Fe1O3_ICSD_180498      | 1.67 eV    | 1.53 eV   |
| Bi1Fe1O3_ICSD_188467      | 1.34 eV    | 1.10 eV   |
| Bi1Fe1O3_ICSD_22342       | 1.57 eV    | 1.50 eV   |
| Bi1Fe2H1O9Si2_ICSD_200069 | 2.28 eV    | 2.20 eV   |
| Bi1Ga1O3_ICSD_157550      | 1.30 eV    | 1.18 eV   |
| Bi1Ga1O3_ICSD_171709      | 1.91 eV    | 2.41 eV   |
| Bi1Ge1K1S4_ICSD_421486    | 1.94 eV    | 1.99 eV   |
| Bi1Ge1Rb1S4_ICSD_281167   | 1.98 eV    | 2.00 eV   |
| Bi1H1O12P4_ICSD_1967      | 5.01 eV    | 3.96 eV   |
| Bi1H1O7Sr4_ICSD_419369    | 1.26 eV    | 2.41 eV   |
| Bi1I1Mn1Se2_ICSD_415138   | 1.23 eV    | 1.00 eV   |
| Bi1I1O1_ICSD_391354       | 1.52 eV    | 1.96 eV   |
| Bi1I1O2Sr1_ICSD_97510     | 2.89 eV    | 2.76 eV   |
| Bi1I1O3Te1_ICSD_56218     | 2.34 eV    | 2.07 eV   |
| Bi1I1O4_ICSD_262019       | 2.40 eV    | 2.43 eV   |
| Bi1I1S1_ICSD_25575        | 1.00 eV    | 0.98 eV   |
| Bi1I1Se1_ICSD_280311      | 1.56 eV    | 1.19 eV   |
| Bi1I1Te1_ICSD_263109      | 1.20 eV    | 0.83 eV   |
| Bi1I1_ICSD_1558           | 0.71 eV    | 0.89 eV   |
| Bi1I1_ICSD_1559           | 0.70 eV    | 1.05 eV   |
| Bi1I3_ICSD_187608         | 2.27 eV    | 2.38 eV   |
| Bi1I3_ICSD_187611         | 2.28 eV    | 2.36 eV   |
| Bi1I3_ICSD_20676          | 2.41 eV    | 2.30 eV   |
| Bi1I3_ICSD_56570          | 2.51 eV    | 2.36 eV   |

Supplementary Table 681. Five-fold cross validated predictions for the band gap energy (75/277).

| system                  | calculated | predicted |
|-------------------------|------------|-----------|
| Bi1I6Ti3_ICSD_417537    | 2.48 eV    | 2.19 eV   |
| Bi1In1O3_ICSD_158758    | 0.22 eV    | 1.10 eV   |
| Bi1In1O3_ICSD_171756    | 2.91 eV    | 2.45 eV   |
| Bi1In1O3_ICSD_171757    | 2.49 eV    | 2.37 eV   |
| Bi1In1S3_ICSD_290195    | 1.35 eV    | 1.41 eV   |
| Bi1Ir1S1_ICSD_616740    | 0.74 eV    | 0.88 eV   |
| Bi1Ir1Se1_ICSD_616741   | 0.58 eV    | 0.73 eV   |
| Bi1K1Li6O6_ICSD_71035   | 1.52 eV    | 1.99 eV   |
| Bi1K1Mg1_ICSD_616748    | 0.43 eV    | 0.61 eV   |
| Bi1K1O2_ICSD_407209     | 1.85 eV    | 1.81 eV   |
| Bi1K1O3_ICSD_76976      | 0.57 eV    | 2.11 eV   |
| Bi1K1O8W2_ICSD_391361   | 2.76 eV    | 2.86 eV   |
| Bi1K1P2S6_ICSD_409686   | 2.23 eV    | 2.06 eV   |
| Bi1K1P2Se6_ICSD_90153   | 1.76 eV    | 1.62 eV   |
| Bi1K1S4Si1_ICSD_421485  | 2.04 eV    | 2.18 eV   |
| Bi1K1_ICSD_55065        | 0.42 eV    | 0.40 eV   |
| Bi1K2Rb1Se3_ICSD_85412  | 2.15 eV    | 1.98 eV   |
| Bi1K3O3_ICSD_407293     | 3.00 eV    | 2.50 eV   |
| Bi1K3P2S8_ICSD_81772    | 2.11 eV    | 2.03 eV   |
| Bi1K3Se3_ICSD_78841     | 2.07 eV    | 1.87 eV   |
| Bi1K3Te3_ICSD_300183    | 1.51 eV    | 1.15 eV   |
| Bi1K9O24U6_ICSD_66528   | 2.58 eV    | 2.72 eV   |
| Bi1Li1Mg1_ICSD_108112   | 0.46 eV    | 0.56 eV   |
| Bi1Li1O2_ICSD_25385     | 2.17 eV    | 1.99 eV   |
| Bi1Li1O4Pd2_ICSD_202930 | 1.13 eV    | 1.18 eV   |
| Bi1Li1Sr1_ICSD_58800    | 0.55 eV    | 0.48 eV   |
| Bi1Li1Yb1_ICSD_602201   | 0.25 eV    | 0.38 eV   |
| Bi1Li3O4_ICSD_109087    | 1.16 eV    | 1.96 eV   |
| Bi1Li3_ICSD_58797       | 0.37 eV    | 1.00 eV   |
| Bi1Li5O5_ICSD_203031    | 1.45 eV    | 1.79 eV   |
| Bi1Mg2O6P1_ICSD_73894   | 3.63 eV    | 3.40 eV   |
| Bi1Mg2O6V1_ICSD_72175   | 3.18 eV    | 2.69 eV   |
| Bi1Mn1O3_ICSD_245299    | 0.28 eV    | 0.32 eV   |
| Bi1Mn1O3_ICSD_245300    | 0.26 eV    | 0.30 eV   |
| Bi1Mn1O3_ICSD_50795     | 0.28 eV    | 0.31 eV   |
| Bi1Mn1O5V1_ICSD_59720   | 2.12 eV    | 1.92 eV   |
| Bi1Mn2O5_ICSD_169736    | 0.30 eV    | 0.84 eV   |
| Bi1Mn2O6P1_ICSD_59673   | 1.99 eV    | 1.94 eV   |
| Bi1N1Sr3_ICSD_152053    | 0.26 eV    | 0.31 eV   |
| Bi1Na1O2_ICSD_10317     | 1.20 eV    | 1.39 eV   |
| Bi1Na1O3_ICSD_27553     | 1.16 eV    | 1.98 eV   |
| Bi1Na1O6Sr3_ICSD_419367 | 1.79 eV    | 2.17 eV   |
| Bi1Na3O3_ICSD_23347     | 2.91 eV    | 2.46 eV   |
| Bi1Na3O4_ICSD_10319     | 1.05 eV    | 1.77 eV   |
| Bi1Nb1O4_ICSD_415850    | 2.64 eV    | 2.64 eV   |
| Bi1Nb1O4_ICSD_74338     | 2.96 eV    | 2.63 eV   |
| Bi1O2Rb1_ICSD_407208    | 2.12 eV    | 2.00 eV   |
| Bi1O3Rb3_ICSD_407294    | 3.11 eV    | 2.49 eV   |
| Bi1O3Rh1_ICSD_188150    | 0.91 eV    | 1.29 eV   |
| Bi1O3Sc1_ICSD_171384    | 2.79 eV    | 2.63 eV   |

Supplementary Table 682. Five-fold cross validated predictions for the band gap energy (76/277).

| system                   | calculated | predicted |
|--------------------------|------------|-----------|
| Bi1O3Sc1.ICSD.171385     | 2.78 eV    | 2.63 eV   |
| Bi1O3Sc1.ICSD.181115     | 0.66 eV    | 1.93 eV   |
| Bi1O3Sr1.ICSD.85173      | 0.19 eV    | 1.27 eV   |
| Bi1O4P1.ICSD.189659      | 3.84 eV    | 3.55 eV   |
| Bi1O4P1.ICSD.27469       | 3.69 eV    | 3.77 eV   |
| Bi1O4Sb1.ICSD.80821      | 0.50 eV    | 1.33 eV   |
| Bi1O4Ta1.ICSD.415849     | 2.99 eV    | 2.59 eV   |
| Bi1O4Ta1.ICSD.97423      | 3.00 eV    | 2.68 eV   |
| Bi1O4V1.ICSD.100601      | 2.28 eV    | 2.11 eV   |
| Bi1O4V1.ICSD.100733      | 2.76 eV    | 2.27 eV   |
| Bi1O5P1Pb1.ICSD.419125   | 3.36 eV    | 3.12 eV   |
| Bi1O5Pb1V1.ICSD.419123   | 2.20 eV    | 2.39 eV   |
| Bi1O5Pb1V1.ICSD.419126   | 2.91 eV    | 2.54 eV   |
| Bi1O6P1Zn2.ICSD.91234    | 3.25 eV    | 2.96 eV   |
| Bi1O8P1Pb4.ICSD.50649    | 2.56 eV    | 2.30 eV   |
| Bi1Os1Se1.ICSD.616892    | 0.74 eV    | 0.87 eV   |
| Bi1P2S6Ti1.ICSD.249461   | 2.01 eV    | 2.04 eV   |
| Bi1Rb1S2.ICSD.52735      | 1.35 eV    | 1.64 eV   |
| Bi1Rb1S4Si1.ICSD.281166  | 2.07 eV    | 2.24 eV   |
| Bi1Rb1.ICSD.55066        | 0.39 eV    | 0.40 eV   |
| Bi1Rb3Se3.ICSD.85411     | 2.08 eV    | 1.83 eV   |
| Bi1Rh1S1.ICSD.617013     | 0.45 eV    | 0.64 eV   |
| Bi1Rh1Se1.ICSD.617014    | 0.28 eV    | 0.50 eV   |
| Bi1S2Ti1.ICSD.172572     | 0.46 eV    | 0.88 eV   |
| Bi1Se2Ti1.ICSD.43314     | 0.23 eV    | 0.48 eV   |
| Bi1Te2Ti1.ICSD.15412     | 0.43 eV    | 0.38 eV   |
| Bi24Ge2O40.ICSD.68431    | 2.44 eV    | 2.28 eV   |
| Bi24O40Pb2.ICSD.75392    | 1.74 eV    | 2.03 eV   |
| Bi24O40Ti2.ICSD.75389    | 2.39 eV    | 2.15 eV   |
| Bi2Br1Dy1O4.ICSD.92417   | 1.34 eV    | 1.39 eV   |
| Bi2Br1Er1O4.ICSD.92420   | 1.37 eV    | 1.41 eV   |
| Bi2Br1Eu1O4.ICSD.92414   | 0.18 eV    | 0.33 eV   |
| Bi2Br1Gd1O4.ICSD.92415   | 1.30 eV    | 1.24 eV   |
| Bi2Br1Ho1O4.ICSD.92419   | 1.39 eV    | 1.37 eV   |
| Bi2Br1In1Se4.ICSD.159465 | 1.29 eV    | 1.12 eV   |
| Bi2Br1Lu1O4.ICSD.92423   | 1.41 eV    | 1.46 eV   |
| Bi2Br1Nd1O4.ICSD.92412   | 1.25 eV    | 1.29 eV   |
| Bi2Br1O4Pr1.ICSD.92411   | 1.12 eV    | 1.15 eV   |
| Bi2Br1O4Tb1.ICSD.92416   | 1.36 eV    | 1.36 eV   |
| Bi2Br1O4Y1.ICSD.92418    | 1.35 eV    | 1.39 eV   |
| Bi2Br8Te4.ICSD.83806     | 1.04 eV    | 2.02 eV   |
| Bi2Br9Cs3.ICSD.1142      | 2.58 eV    | 2.20 eV   |
| Bi2Br9Cs3.ICSD.96723     | 2.58 eV    | 2.21 eV   |
| Bi2C1O5.ICSD.94740       | 1.14 eV    | 2.33 eV   |
| Bi2C2Ca1O8.ICSD.94741    | 1.06 eV    | 1.99 eV   |
| Bi2Ca1Mg2.ICSD.261988    | 0.46 eV    | 0.46 eV   |
| Bi2Ca4O1.ICSD.416137     | 0.82 eV    | 0.75 eV   |
| Bi2Cd1Cs2S5.ICSD.97427   | 1.74 eV    | 1.65 eV   |
| Bi2Cd1Ge1O6.ICSD.82157   | 1.91 eV    | 2.34 eV   |
| Bi2Cl1Dy1O4.ICSD.92404   | 1.44 eV    | 1.41 eV   |

Supplementary Table 683. Five-fold cross validated predictions for the band gap energy (77/277).

| system                   | calculated | predicted |
|--------------------------|------------|-----------|
| Bi2Cl1Er1O4.ICSD.92407   | 1.44 eV    | 1.47 eV   |
| Bi2Cl1Eu1O4.ICSD.92401   | 0.41 eV    | 0.37 eV   |
| Bi2Cl1Gd1O4.ICSD.92402   | 1.27 eV    | 1.25 eV   |
| Bi2Cl1Ho1O4.ICSD.92406   | 1.41 eV    | 1.42 eV   |
| Bi2Cl1In1S4.ICSD.484     | 1.88 eV    | 1.58 eV   |
| Bi2Cl1Lu1O4.ICSD.92410   | 1.47 eV    | 1.59 eV   |
| Bi2Cl1Nd1O4.ICSD.92399   | 1.31 eV    | 1.37 eV   |
| Bi2Cl1O4Pr1.ICSD.92398   | 1.09 eV    | 1.25 eV   |
| Bi2Cl1O4Tb1.ICSD.92403   | 1.37 eV    | 1.38 eV   |
| Bi2Cl1O4Y1.ICSD.92405    | 1.35 eV    | 1.61 eV   |
| Bi2Cl1O4Yb1.ICSD.92409   | 0.17 eV    | 0.29 eV   |
| Bi2Co1Mn1O6.ICSD.153856  | 0.76 eV    | 0.89 eV   |
| Bi2Co1O7S1.ICSD.65135    | 2.55 eV    | 2.36 eV   |
| Bi2Cr1Fe1O6.ICSD.246426  | 1.81 eV    | 1.57 eV   |
| Bi2Cs1Cu1S4.ICSD.93370   | 0.75 eV    | 1.04 eV   |
| Bi2Cs2Pd1.ICSD.658703    | 0.54 eV    | 0.48 eV   |
| Bi2Cs2Pt1.ICSD.658701    | 0.49 eV    | 0.60 eV   |
| Bi2Cs3I9.ICSD.1448       | 2.07 eV    | 2.20 eV   |
| Bi2Cs3I9.ICSD.411633     | 2.37 eV    | 2.19 eV   |
| Bi2Cu1K1S4.ICSD.91297    | 0.89 eV    | 0.95 eV   |
| Bi2Cu1O12Se4.ICSD.66826  | 1.75 eV    | 1.61 eV   |
| Bi2Cu1O4.ICSD.12104      | 0.43 eV    | 0.62 eV   |
| Bi2Cu1O4.ICSD.68812      | 0.83 eV    | 0.84 eV   |
| Bi2Dy1I1O4.ICSD.92431    | 1.37 eV    | 1.40 eV   |
| Bi2Er1I1O4.ICSD.89618    | 1.42 eV    | 1.37 eV   |
| Bi2Eu1I1O4.ICSD.92428    | 0.13 eV    | 0.41 eV   |
| Bi2Eu1Se4.ICSD.600805    | 1.02 eV    | 0.73 eV   |
| Bi2Fe4O9.ICSD.26808      | 1.34 eV    | 1.27 eV   |
| Bi2Ga2In4S12.ICSD.410032 | 1.84 eV    | 1.44 eV   |
| Bi2Ga4O9.ICSD.248245     | 2.92 eV    | 2.62 eV   |
| Bi2Ga4S8.ICSD.408441     | 2.55 eV    | 1.99 eV   |
| Bi2Ga4Se8.ICSD.408442    | 1.93 eV    | 1.73 eV   |
| Bi2Ge1O5.ICSD.62488      | 2.31 eV    | 2.27 eV   |
| Bi2Ge1O5.ICSD.65522      | 2.34 eV    | 2.43 eV   |
| Bi2Ge1O5.ICSD.94334      | 2.32 eV    | 2.37 eV   |
| Bi2Ge1Te4.ICSD.658633    | 0.59 eV    | 0.45 eV   |
| Bi2Ge3O9.ICSD.100277     | 2.98 eV    | 2.89 eV   |
| Bi2H16Na6O14.ICSD.412583 | 3.94 eV    | 3.11 eV   |
| Bi2Hg1S4.ICSD.14189      | 1.22 eV    | 1.16 eV   |
| Bi2Ho1I1O4.ICSD.92433    | 1.40 eV    | 1.37 eV   |
| Bi2I1La1O4.ICSD.92424    | 1.21 eV    | 1.32 eV   |
| Bi2I1Lu1O4.ICSD.92437    | 1.48 eV    | 1.41 eV   |
| Bi2I1Nd1O4.ICSD.92426    | 1.28 eV    | 1.23 eV   |
| Bi2I1O4Pr1.ICSD.92425    | 1.28 eV    | 1.19 eV   |
| Bi2I1O4Tb1.ICSD.92430    | 1.34 eV    | 1.37 eV   |
| Bi2I1O4Y1.ICSD.92432     | 1.40 eV    | 1.40 eV   |
| Bi2In4S9.ICSD.2839       | 1.66 eV    | 1.39 eV   |
| Bi2K3O12P3.ICSD.409582   | 3.77 eV    | 3.61 eV   |
| Bi2K4O5.ICSD.408000      | 2.64 eV    | 2.45 eV   |
| Bi2Li8O10Pd1.ICSD.73000  | 1.25 eV    | 1.53 eV   |

Supplementary Table 684. Five-fold cross validated predictions for the band gap energy (78/277).

| system                  | calculated | predicted |
|-------------------------|------------|-----------|
| Bi2Mg2Sr1.ICSD_616807   | 0.46 eV    | 0.43 eV   |
| Bi2Mn1Ni1O6.ICSD_159285 | 0.86 eV    | 0.98 eV   |
| Bi2Mo1O6.ICSD_14266     | 2.11 eV    | 1.29 eV   |
| Bi2Mo1O6.ICSD_17070     | 0.44 eV    | 1.52 eV   |
| Bi2Mo1O6.ICSD_37251     | 0.36 eV    | 1.46 eV   |
| Bi2Na1O11Sb3.ICSD_79859 | 2.39 eV    | 2.14 eV   |
| Bi2Nb2O9Pb1.ICSD_20668  | 0.88 eV    | 1.76 eV   |
| Bi2O10Pb2V2.ICSD_60577  | 2.93 eV    | 2.65 eV   |
| Bi2O10Te2W1.ICSD_78917  | 2.87 eV    | 2.32 eV   |
| Bi2O11Ti4.ICSD_79769    | 2.36 eV    | 2.48 eV   |
| Bi2O13P4.ICSD_65133     | 4.54 eV    | 3.79 eV   |
| Bi2O2S1.ICSD_29451      | 0.84 eV    | 0.69 eV   |
| Bi2O2Se1.ICSD_411143    | 0.40 eV    | 1.01 eV   |
| Bi2O3.ICSD_168808       | 0.16 eV    | 0.98 eV   |
| Bi2O3.ICSD_168810       | 2.39 eV    | 1.85 eV   |
| Bi2O3.ICSD_168811       | 2.59 eV    | 2.23 eV   |
| Bi2O3.ICSD_168813       | 1.86 eV    | 1.96 eV   |
| Bi2O3.ICSD_168814       | 2.61 eV    | 2.04 eV   |
| Bi2O3.ICSD_168815       | 1.82 eV    | 2.08 eV   |
| Bi2O3.ICSD_169686       | 2.35 eV    | 2.18 eV   |
| Bi2O3.ICSD_186365       | 1.12 eV    | 1.07 eV   |
| Bi2O3.ICSD_261777       | 2.31 eV    | 2.05 eV   |
| Bi2O3.ICSD_27152        | 1.78 eV    | 1.95 eV   |
| Bi2O3.ICSD_421855       | 1.59 eV    | 1.76 eV   |
| Bi2O3.ICSD_616890       | 2.30 eV    | 2.18 eV   |
| Bi2O3.ICSD_62979        | 1.67 eV    | 1.83 eV   |
| Bi2O4Pd1.ICSD_200145    | 0.95 eV    | 1.00 eV   |
| Bi2O4Pd1.ICSD_9622      | 0.26 eV    | 0.84 eV   |
| Bi2O4Sr1.ICSD_80668     | 2.69 eV    | 1.40 eV   |
| Bi2O4.ICSD_79500        | 1.22 eV    | 1.40 eV   |
| Bi2O5Se1.ICSD_409518    | 2.88 eV    | 2.50 eV   |
| Bi2O5Si1.ICSD_30995     | 2.73 eV    | 2.77 eV   |
| Bi2O5Sr2.ICSD_86415     | 2.27 eV    | 2.03 eV   |
| Bi2O5Te1.ICSD_36446     | 2.44 eV    | 2.25 eV   |
| Bi2O6Te1.ICSD_6239      | 1.24 eV    | 1.59 eV   |
| Bi2O6Ti1Zn1.ICSD_162767 | 1.51 eV    | 2.07 eV   |
| Bi2O6Ti1Zn1.ICSD_162768 | 1.66 eV    | 2.00 eV   |
| Bi2O6Ti1Zn1.ICSD_186802 | 2.83 eV    | 2.06 eV   |
| Bi2O6Ti1Zn1.ICSD_186803 | 1.63 eV    | 1.91 eV   |
| Bi2O6U1.ICSD_1805       | 2.21 eV    | 1.70 eV   |
| Bi2O6U1.ICSD_1806       | 2.02 eV    | 1.68 eV   |
| Bi2O6W1.ICSD_23584      | 2.07 eV    | 2.18 eV   |
| Bi2O6W1.ICSD_66579      | 2.09 eV    | 2.36 eV   |
| Bi2O6W1.ICSD_67647      | 2.15 eV    | 1.92 eV   |
| Bi2O7Pt2.ICSD_161104    | 1.07 eV    | 1.20 eV   |
| Bi2O7Sn2.ICSD_50311     | 2.63 eV    | 2.24 eV   |
| Bi2O7Ti2.ICSD_180394    | 2.89 eV    | 2.45 eV   |
| Bi2O9Si3.ICSD_155234    | 3.61 eV    | 3.29 eV   |
| Bi2O9W2.ICSD_88428      | 2.31 eV    | 2.02 eV   |
| Bi2Pb1S4.ICSD_31859     | 1.01 eV    | 1.08 eV   |

Supplementary Table 685. Five-fold cross validated predictions for the band gap energy (79/277).

| system                   | calculated | predicted |
|--------------------------|------------|-----------|
| Bi2Pb1Te4.ICSD_616936    | 0.49 eV    | 0.43 eV   |
| Bi2Pb2Se5.ICSD_30372     | 0.49 eV    | 0.57 eV   |
| Bi2Pb3S6.ICSD_92981      | 0.61 eV    | 0.93 eV   |
| Bi2S1Te2.ICSD_26720      | 0.41 eV    | 0.72 eV   |
| Bi2S3.ICSD_617021        | 1.36 eV    | 1.23 eV   |
| Bi2S4Yb1.ICSD_600812     | 1.13 eV    | 1.18 eV   |
| Bi2Se2Te1.ICSD_54838     | 0.76 eV    | 0.59 eV   |
| Bi2Se3.ICSD_171571       | 0.99 eV    | 0.74 eV   |
| Bi2Se3.ICSD_617083       | 0.49 eV    | 0.70 eV   |
| Bi2Se3.ICSD_617096       | 0.56 eV    | 1.06 eV   |
| Bi2Te3.ICSD_617187       | 0.31 eV    | 0.36 eV   |
| Bi3Br1Se4.ICSD_411096    | 1.04 eV    | 1.12 eV   |
| Bi3Cl5O10Te4.ICSD_168978 | 2.37 eV    | 2.80 eV   |
| Bi3Cs1Se5.ICSD_171610    | 1.00 eV    | 0.81 eV   |
| Bi3F6N1.ICSD_79395       | 2.79 eV    | 3.28 eV   |
| Bi3Fe1Mo2O12.ICSD_45     | 2.44 eV    | 1.88 eV   |
| Bi3Mn4N1O15.ICSD_260393  | 0.87 eV    | 1.45 eV   |
| Bi3Na1O10V2.ICSD_88455   | 2.72 eV    | 2.41 eV   |
| Bi3O7Sb1.ICSD_51779      | 2.19 eV    | 1.87 eV   |
| Bi3O8Re1.ICSD_185903     | 2.82 eV    | 2.61 eV   |
| Bi3O8Re1.ICSD_185904     | 2.72 eV    | 2.38 eV   |
| Bi4Br2O5.ICSD_412591     | 2.55 eV    | 2.42 eV   |
| Bi4Br2O9Te2.ICSD_79508   | 0.88 eV    | 1.98 eV   |
| Bi4Ce3Pd3.ICSD_419162    | 0.28 eV    | 0.13 eV   |
| Bi4Ce3Pt3.ICSD_616565    | 0.33 eV    | 0.37 eV   |
| Bi4Cl14Se4.ICSD_410910   | 1.35 eV    | 2.44 eV   |
| Bi4Cl16Te14.ICSD_391157  | 0.59 eV    | 1.05 eV   |
| Bi4Cl1O8Ta1.ICSD_59601   | 1.13 eV    | 1.71 eV   |
| Bi4Cu3La3.ICSD_167250    | 0.18 eV    | 0.25 eV   |
| Bi4Ge1Te7.ICSD_42891     | 0.64 eV    | 0.43 eV   |
| Bi4Ge3O12.ICSD_108872    | 3.46 eV    | 2.91 eV   |
| Bi4I2O5.ICSD_412590      | 2.25 eV    | 2.33 eV   |
| Bi4I2Ru1.ICSD_406949     | 0.53 eV    | 0.64 eV   |
| Bi4Li1Nb3O14.ICSD_391261 | 2.90 eV    | 2.66 eV   |
| Bi4O11Ta2.ICSD_50601     | 2.85 eV    | 2.58 eV   |
| Bi4O12Si3.ICSD_69430     | 3.91 eV    | 3.21 eV   |
| Bi4O7.ICSD_51778         | 1.05 eV    | 1.76 eV   |
| Bi4Pb1Te7.ICSD_250249    | 0.38 eV    | 0.40 eV   |
| Bi4Sn1Te7.ICSD_236253    | 0.39 eV    | 0.45 eV   |
| Bi4Te3.ICSD_30526        | 0.13 eV    | 0.34 eV   |
| Bi5Cl12Ga3.ICSD_414089   | 1.80 eV    | 2.33 eV   |
| Bi5I1O7.ICSD_30978       | 2.53 eV    | 2.07 eV   |
| Bi6Cu2Pb2S12.ICSD_160417 | 0.82 eV    | 1.00 eV   |
| Bi6Se13Sr4.ICSD_62782    | 0.49 eV    | 0.84 eV   |
| Bi7Cs3Se12.ICSD_61785    | 0.62 eV    | 0.79 eV   |
| Bi7F11O5.ICSD_167074     | 3.92 eV    | 3.19 eV   |
| Bi7O18Ta3.ICSD_280093    | 2.37 eV    | 2.46 eV   |
| Bi8K2Se13.ICSD_72976     | 0.80 eV    | 0.89 eV   |
| Bi9I3Rh2.ICSD_411136     | 0.46 eV    | 0.64 eV   |
| Br1.6Cl0.4Sr1.ICSD_35052 | 4.44 eV    | 4.44 eV   |

Supplementary Table 686. Five-fold cross validated predictions for the band gap energy (80/277).

| system                    | calculated | predicted |
|---------------------------|------------|-----------|
| Br10Co1Er6.ICSD.424427    | 0.17 eV    | 0.50 eV   |
| Br10Co1Y6.ICSD.424465     | 0.18 eV    | 0.43 eV   |
| Br10Gd6Ir1.ICSD.424456    | 0.10 eV    | 0.15 eV   |
| Br10Ir1Tb6.ICSD.424434    | 0.09 eV    | 0.21 eV   |
| Br10Ni1Tb6.ICSD.424435    | 0.36 eV    | 1.11 eV   |
| Br10Ni1Y6.ICSD.424466     | 0.42 eV    | 0.50 eV   |
| Br10O1Ta2Te4.ICSD.401906  | 1.00 eV    | 1.42 eV   |
| Br10O4Pb9.ICSD.35381      | 2.92 eV    | 2.73 eV   |
| Br10Pd1Y6.ICSD.424467     | 0.33 eV    | 0.52 eV   |
| Br10Rb1Re3.ICSD.33911     | 0.90 eV    | 1.19 eV   |
| Br10Re2Te6.ICSD.410190    | 1.41 eV    | 1.45 eV   |
| Br11Cs1Nb4.ICSD.26077     | 0.32 eV    | 0.83 eV   |
| Br12Co1Ho7.ICSD.424451    | 0.45 eV    | 0.60 eV   |
| Br12Co1Sc7.ICSD.424474    | 0.37 eV    | 0.98 eV   |
| Br12Os1Se2.ICSD.182315    | 1.03 eV    | 1.22 eV   |
| Br12Ta2Te4.ICSD.401905    | 1.16 eV    | 1.37 eV   |
| Br14Cd1W6.ICSD.80887      | 2.26 eV    | 2.35 eV   |
| Br14Mo6Pb1.ICSD.36573     | 2.49 eV    | 2.04 eV   |
| Br14Rb2W6.ICSD.390028     | 2.91 eV    | 1.70 eV   |
| Br14Ta6.ICSD.402031       | 1.11 eV    | 1.13 eV   |
| Br15Co1Th6.ICSD.33926     | 0.70 eV    | 0.99 eV   |
| Br16Re4Te8.ICSD.78924     | 2.05 eV    | 1.64 eV   |
| Br17Nb6Rb3S1.ICSD.400496  | 0.55 eV    | 0.95 eV   |
| Br18Cs1Er1Ta6.ICSD.77666  | 1.22 eV    | 1.19 eV   |
| Br18K4Nb6.ICSD.49687      | 1.07 eV    | 0.86 eV   |
| Br18Nb6Ti4.ICSD.402033    | 1.04 eV    | 1.27 eV   |
| Br1C1C11F1H3.ICSD.424851  | 2.69 eV    | 3.51 eV   |
| Br1C1Cu1H2N2.ICSD.420807  | 2.55 eV    | 2.21 eV   |
| Br1C1K1N2O4.ICSD.42826    | 2.10 eV    | 2.75 eV   |
| Br1C2H8N1.ICSD.110459     | 4.70 eV    | 4.58 eV   |
| Br1C2H8N1.ICSD.400651     | 4.71 eV    | 4.28 eV   |
| Br1C2N2Ni1Rb1.ICSD.380470 | 2.30 eV    | 2.21 eV   |
| Br1C3H10N1.ICSD.171150    | 4.75 eV    | 4.75 eV   |
| Br1C4N3.ICSD.246789       | 3.30 eV    | 3.18 eV   |
| Br1C5Mn1O5.ICSD.281349    | 2.82 eV    | 2.88 eV   |
| Br1C5O5Re1.ICSD.66697     | 2.49 eV    | 2.54 eV   |
| Br1C5O5Te1.ICSD.167773    | 2.60 eV    | 2.52 eV   |
| Br1C8H20Li1O4.ICSD.151064 | 4.61 eV    | 4.44 eV   |
| Br1Ca1H1.ICSD.25542       | 4.14 eV    | 3.08 eV   |
| Br1Ca2H3.ICSD.420928      | 1.57 eV    | 3.09 eV   |
| Br1Ca2N1.ICSD.153105      | 2.42 eV    | 2.05 eV   |
| Br1Cd1S2Sb1.ICSD.171723   | 1.58 eV    | 1.55 eV   |
| Br1Cd2P3.ICSD.100817      | 1.17 eV    | 1.16 eV   |
| Br1Cd2P3.ICSD.100880      | 1.17 eV    | 1.26 eV   |
| Br1Ce2S5Sb1.ICSD.51484    | 1.46 eV    | 1.58 eV   |
| Br1Ce3S8Si2.ICSD.39052    | 2.69 eV    | 2.53 eV   |
| Br1Cl14P3.ICSD.80214      | 1.56 eV    | 2.02 eV   |
| Br1Cl1.ICSD.424850        | 1.75 eV    | 2.06 eV   |
| Br1Cr1O1.ICSD.27092       | 1.31 eV    | 1.45 eV   |
| Br1Cr1S1.ICSD.69659       | 0.63 eV    | 0.80 eV   |

Supplementary Table 687. Five-fold cross validated predictions for the band gap energy (81/277).

| system                       | calculated | predicted |
|------------------------------|------------|-----------|
| Br1Cr2O4P1.ICSD.410823       | 2.03 eV    | 2.18 eV   |
| Br1Cs1F6.ICSD.65712          | 3.99 eV    | 4.30 eV   |
| Br1Cs1O3.ICSD.74769          | 4.29 eV    | 3.93 eV   |
| Br1Cs1O4.ICSD.201158         | 3.68 eV    | 3.68 eV   |
| Br1Cs1.ICSD.53834            | 4.27 eV    | 4.12 eV   |
| Br1Cs1.ICSD.61516            | 4.27 eV    | 4.22 eV   |
| Br1Cu1H6N2.ICSD.170947       | 2.41 eV    | 2.03 eV   |
| Br1Cu1Hg1S1.ICSD.412308      | 0.73 eV    | 0.92 eV   |
| Br1Cu1Hg1Se1.ICSD.411771     | 0.78 eV    | 0.91 eV   |
| Br1Cu1N4S4.ICSD.33515        | 1.09 eV    | 1.64 eV   |
| Br1Cu1O2Sr2.ICSD.65470       | 2.74 eV    | 2.24 eV   |
| Br1Cu1Se3.ICSD.71309         | 1.15 eV    | 1.03 eV   |
| Br1Cu1Te2.ICSD.67252         | 0.91 eV    | 0.92 eV   |
| Br1Cu1.ICSD.30091            | 0.96 eV    | 1.13 eV   |
| Br1Cu1.ICSD.78275            | 1.14 eV    | 1.06 eV   |
| Br1Cu1.ICSD.78278            | 0.76 eV    | 1.06 eV   |
| Br1Cu1.ICSD.78280            | 0.89 eV    | 1.00 eV   |
| Br1Cu6P1S5.ICSD.89450        | 1.10 eV    | 1.09 eV   |
| Br1Dy1Mo1O4.ICSD.425268      | 1.82 eV    | 1.93 eV   |
| Br1Dy1S1.ICSD.79106          | 2.87 eV    | 2.55 eV   |
| Br1Er1Mo1O4.ICSD.425270      | 1.91 eV    | 2.15 eV   |
| Br1Eu1I1.ICSD.59885          | 2.99 eV    | 3.16 eV   |
| Br1Eu2P1.ICSD.202067         | 0.84 eV    | 0.88 eV   |
| Br1Eu3O4.ICSD.34605          | 0.23 eV    | 1.09 eV   |
| Br1F1Pb1.ICSD.155011         | 2.58 eV    | 2.75 eV   |
| Br1F1Sr1.ICSD.159279         | 5.00 eV    | 4.79 eV   |
| Br1F3Rb1Sb1.ICSD.200109      | 3.77 eV    | 3.55 eV   |
| Br1F3.ICSD.39441             | 2.17 eV    | 2.74 eV   |
| Br1F4K1.ICSD.16633           | 0.87 eV    | 3.72 eV   |
| Br1F4K1.ICSD.16700           | 3.12 eV    | 3.92 eV   |
| Br1F4N1O2.ICSD.412427        | 2.33 eV    | 2.52 eV   |
| Br1F4Rb1.ICSD.65713          | 3.32 eV    | 3.28 eV   |
| Br1F5O3Te1.ICSD.50200        | 2.77 eV    | 2.69 eV   |
| Br1F5Sn3.ICSD.1383           | 3.19 eV    | 2.96 eV   |
| Br1F5.ICSD.31690             | 3.47 eV    | 2.77 eV   |
| Br1F6O2Sb1.ICSD.173608       | 1.98 eV    | 2.40 eV   |
| Br1F8Sb1.ICSD.9886           | 2.74 eV    | 2.17 eV   |
| Br1Fe1O3Sr2.ICSD.93509       | 0.85 eV    | 0.91 eV   |
| Br1Gd1Mo1O4.ICSD.425266      | 1.84 eV    | 1.89 eV   |
| Br1Gd1O1.ICSD.41071          | 4.34 eV    | 3.83 eV   |
| Br1Gd3S8Si2.ICSD.411995      | 2.37 eV    | 2.25 eV   |
| Br1H1Hg1O4.ICSD.29039        | 1.99 eV    | 2.20 eV   |
| Br1H1K2O1.ICSD.78734         | 3.50 eV    | 3.35 eV   |
| Br1H1O1Pb1.ICSD.404573       | 3.11 eV    | 2.79 eV   |
| Br1H1O1Rb2.ICSD.78735        | 3.35 eV    | 3.37 eV   |
| Br1H1O1Sr1.ICSD.407720       | 4.31 eV    | 3.93 eV   |
| Br1H1Sr1.ICSD.25543          | 3.80 eV    | 3.53 eV   |
| Br1H1.ICSD.28842             | 1.32 eV    | 1.78 eV   |
| Br1H2Li1O1.ICSD.391154       | 4.40 eV    | 4.05 eV   |
| Br1H2O6Rb1Se2Zn1.ICSD.409916 | 3.67 eV    | 3.64 eV   |

Supplementary Table 688. Five-fold cross validated predictions for the band gap energy (82/277).

| system                   | calculated | predicted |
|--------------------------|------------|-----------|
| Br1H3Li4O3.ICSD.412730   | 4.45 eV    | 4.33 eV   |
| Br1H4N1O4.ICSD.165085    | 3.05 eV    | 3.14 eV   |
| Br1H4N1.ICSD.27724       | 4.27 eV    | 4.00 eV   |
| Br1H4N1.ICSD.43300       | 3.96 eV    | 3.94 eV   |
| Br1H4Na1O2.ICSD.8125     | 4.26 eV    | 3.97 eV   |
| Br1H4P1.ICSD.23691       | 4.03 eV    | 3.62 eV   |
| Br1H5O2.ICSD.34105       | 4.36 eV    | 3.73 eV   |
| Br1H6Li1O7.ICSD.73706    | 3.13 eV    | 3.67 eV   |
| Br1H6Na1O5.ICSD.74654    | 2.17 eV    | 3.56 eV   |
| Br1Hf1N1.ICSD.51773      | 1.89 eV    | 1.81 eV   |
| Br1Hf1N1.ICSD.95720      | 2.12 eV    | 1.90 eV   |
| Br1Hg1I1.ICSD.109010     | 2.26 eV    | 2.14 eV   |
| Br1Hg2N1.ICSD.24706      | 0.70 eV    | 1.45 eV   |
| Br1Hg2P3.ICSD.74770      | 0.93 eV    | 1.19 eV   |
| Br1Hg3I1Te2.ICSD.99125   | 1.28 eV    | 1.31 eV   |
| Br1Ho1Mo1O4.ICSD.425269  | 1.84 eV    | 2.06 eV   |
| Br1In1O1.ICSD.24059      | 2.12 eV    | 2.22 eV   |
| Br1In1O3Te1.ICSD.420301  | 3.03 eV    | 2.86 eV   |
| Br1In1S4Sb2.ICSD.159467  | 1.54 eV    | 1.56 eV   |
| Br1In1Sb2Se4.ICSD.159466 | 1.11 eV    | 1.12 eV   |
| Br1In1Te1.ICSD.100705    | 1.81 eV    | 1.63 eV   |
| Br1In1.ICSD.62239        | 1.26 eV    | 1.56 eV   |
| Br1In5S5.ICSD.414219     | 1.15 eV    | 1.14 eV   |
| Br1In5Se5.ICSD.414218    | 0.75 eV    | 0.84 eV   |
| Br1K1O3.ICSD.74767       | 3.81 eV    | 3.71 eV   |
| Br1K1O4.ICSD.15222       | 3.07 eV    | 3.37 eV   |
| Br1K1.ICSD.290558        | 3.92 eV    | 3.96 eV   |
| Br1K1.ICSD.52243         | 4.32 eV    | 4.20 eV   |
| Br1K3Mo2O7.ICSD.2163     | 2.99 eV    | 3.03 eV   |
| Br1K3O1.ICSD.33920       | 0.88 eV    | 1.05 eV   |
| Br1La1O1.ICSD.24612      | 4.17 eV    | 4.06 eV   |
| Br1La1O7Pb6.ICSD.249390  | 1.92 eV    | 1.97 eV   |
| Br1La3S8Si2.ICSD.411996  | 2.77 eV    | 2.76 eV   |
| Br1Li10N3.ICSD.78819     | 1.37 eV    | 1.72 eV   |
| Br1Li1.ICSD.44274        | 4.93 eV    | 4.68 eV   |
| Br1Li3O1.ICSD.67265      | 4.28 eV    | 3.09 eV   |
| Br1Li6O5P1.ICSD.421480   | 5.10 eV    | 4.27 eV   |
| Br1Lu1O1.ICSD.249338     | 4.33 eV    | 4.23 eV   |
| Br1Lu1S1.ICSD.6082       | 2.91 eV    | 2.36 eV   |
| Br1Mn1S2Sb1.ICSD.172782  | 1.37 eV    | 1.32 eV   |
| Br1Mn1Sb1Se2.ICSD.172784 | 1.09 eV    | 1.08 eV   |
| Br1Mo1Nd1O4.ICSD.425264  | 2.06 eV    | 2.02 eV   |
| Br1Mo1O4Pr1.ICSD.425263  | 2.07 eV    | 1.96 eV   |
| Br1Mo1O4Tb1.ICSD.425267  | 1.81 eV    | 2.00 eV   |
| Br1Mo1S1.ICSD.163308     | 1.12 eV    | 0.99 eV   |
| Br1Mo1Te4.ICSD.82245     | 0.85 eV    | 0.70 eV   |
| Br1N1O3.ICSD.407765      | 2.24 eV    | 1.91 eV   |
| Br1N1Sr2.ICSD.172600     | 1.85 eV    | 1.79 eV   |
| Br1N1Ti1.ICSD.27395      | 1.20 eV    | 1.19 eV   |
| Br1N1Zn2.ICSD.425736     | 2.12 eV    | 1.93 eV   |

Supplementary Table 689. Five-fold cross validated predictions for the band gap energy (83/277).

| system                          | calculated | predicted |
|---------------------------------|------------|-----------|
| Br1N1Zr1.ICSD.25507             | 2.76 eV    | 1.57 eV   |
| Br1N1Zr1.ICSD.27393             | 1.69 eV    | 1.97 eV   |
| Br1N1Zr1.ICSD.87797             | 1.46 eV    | 1.50 eV   |
| Br1Na1O3.ICSD.1302              | 4.47 eV    | 3.77 eV   |
| Br1Na1.ICSD.53822               | 4.11 eV    | 3.90 eV   |
| Br1Nd1O3Te1.ICSD.92319          | 0.12 eV    | 1.65 eV   |
| Br1O12P3Sr5.ICSD.87102          | 4.95 eV    | 4.56 eV   |
| Br1O1Pr1.ICSD.262128            | 3.68 eV    | 3.17 eV   |
| Br1O1Rb3.ICSD.77196             | 0.41 eV    | 1.16 eV   |
| Br1O1Sc1.ICSD.170774            | 3.77 eV    | 3.02 eV   |
| Br1O1Ti1.ICSD.155650            | 2.05 eV    | 1.95 eV   |
| Br1O1V1.ICSD.27010              | 1.15 eV    | 1.22 eV   |
| Br1O1Y1.ICSD.0                  | 4.41 eV    | 4.35 eV   |
| Br1O3Rb1.ICSD.74768             | 3.97 eV    | 3.98 eV   |
| Br1O3Ti1.ICSD.76966             | 3.54 eV    | 3.24 eV   |
| Br1O4Ti1.ICSD.65660             | 3.02 eV    | 3.30 eV   |
| Br1O4Y3.ICSD.419384             | 4.21 eV    | 3.87 eV   |
| Br1Rb1.ICSD.18017               | 4.22 eV    | 4.06 eV   |
| Br1Rb1.ICSD.61522               | 3.95 eV    | 4.12 eV   |
| Br1S1Sb1.ICSD.40918             | 1.77 eV    | 1.27 eV   |
[truncated: 1,988,994 more chars]
